# Supplementary material for: Integrative Proteomic and Phosphoproteomic Analyses of Hypoxia-Treated Pulmonary Artery Smooth Muscle Cells
Source: MDPI journal article supplement (doi:10.3390/proteomes10030023), 2022-06-28
Supplement: s1 [file s1]

## Supplementary Figures

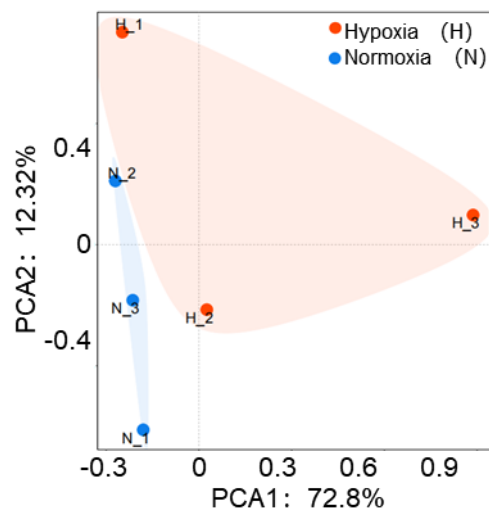

**Figure S1.** Principal component analysis (PCA) of the protein abundances in proteome study.

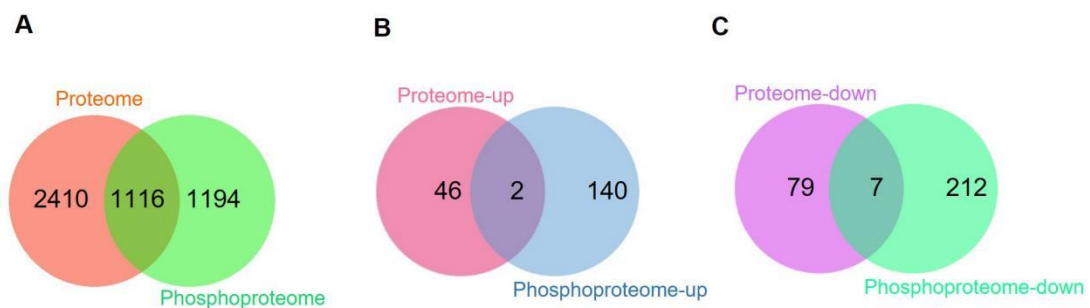

**Figure S2.** Venn diagram showing proteins and phosphoproteins in proteome and phosphoproteome analysis. (A) Total proteins and phosphoproteins. (B) Upregulated proteins and upregulated phosphoproteins. (C) Downregulated proteins and downregulated phosphoproteins.

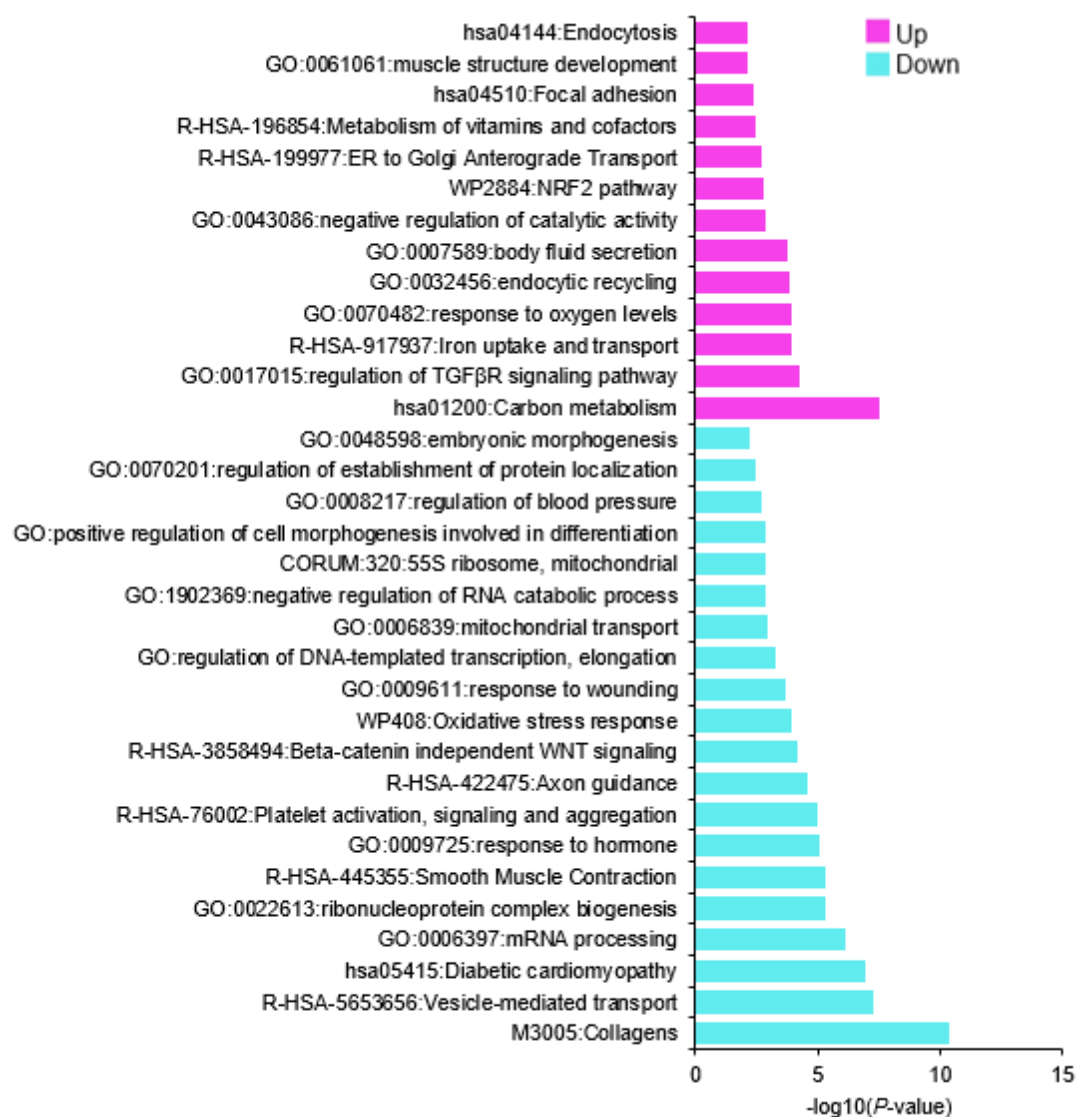

**Figure S3.** Comprehensive Pathway enrichment analysis of significantly changed proteins ( $P < 0.05$ ,  $|\log_2(\text{fold change})| > \log_2(1.1)$ ) in hypoxia-treated cells compared with the control cells (normoxia).

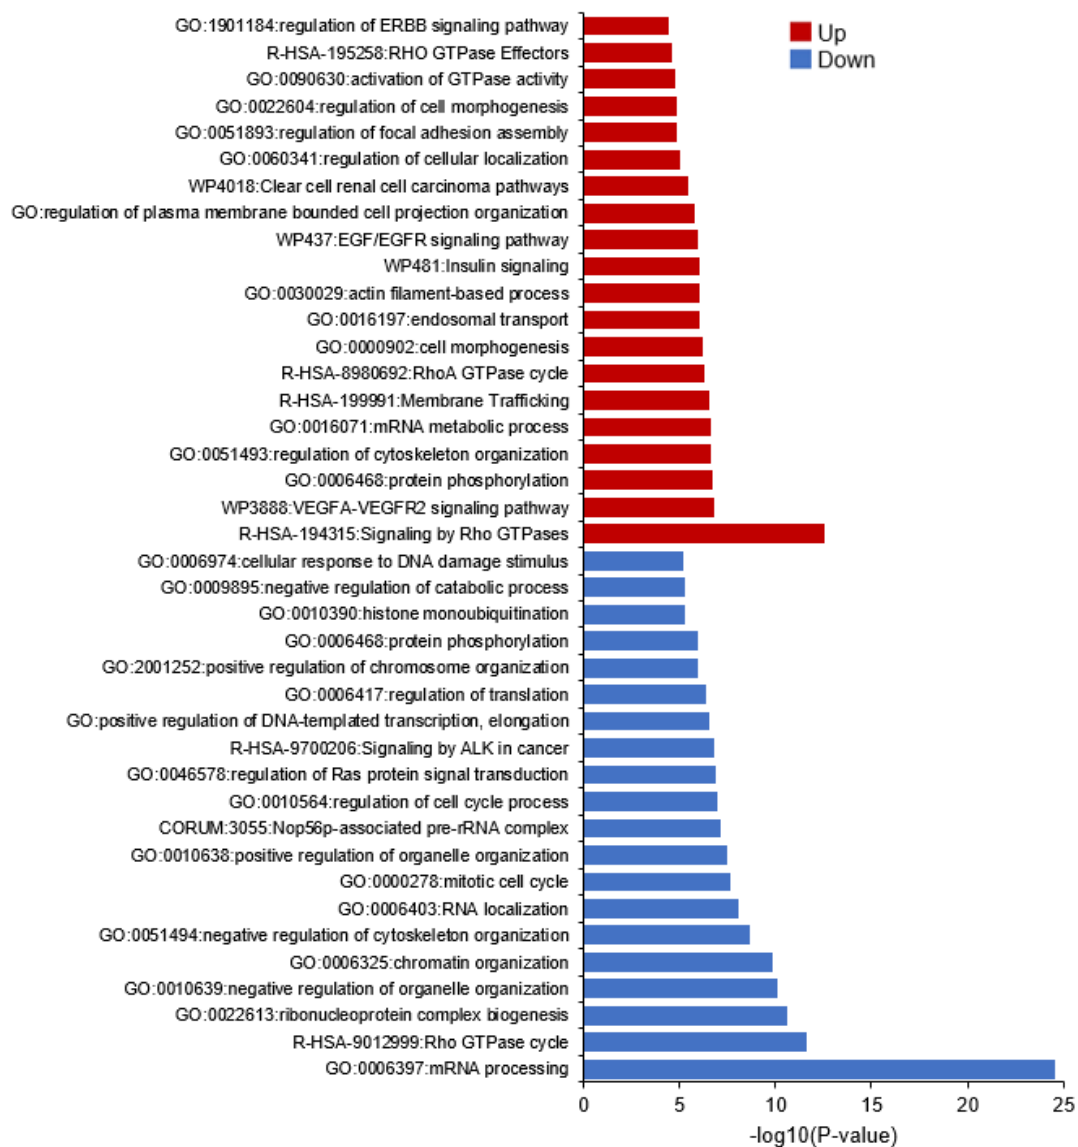

**Figure S4.** Comprehensive Pathway enrichment analysis of significantly changed phosphoproteins ( $P < 0.05$ ,  $|\log_2(\text{fold change})| > \log_2(1.1)$ ) in hypoxia-treated cells compared with the control cells (normoxia).
