# Supplementary material for: Integrative Proteomic and Phosphoproteomic Analyses of Hypoxia-Treated Pulmonary Artery Smooth Muscle Cells
Source: MDPI journal article supplement (doi:10.3390/proteomes10030023), 2022-06-28
Supplement: s1 [file s1]

**Table S2**

Proteins significantly changed in proteome analysis of hypoxia-treated hPASCs

| UniProtKB ID | Gene name       | Protein name                                                        | Fold change |
|--------------|-----------------|---------------------------------------------------------------------|-------------|
| Q15904       | <i>ATP6AP1</i>  | V-type proton ATPase subunit S1                                     | 1.62        |
| Q9BY76       | <i>ANGPTL4</i>  | Angiopoietin-related protein 4                                      | 1.44        |
| O43570       | <i>CA12</i>     | Carbonic anhydrase 12                                               | 1.44        |
| O00743       | <i>PPP6C</i>    | Serine/threonine-protein phosphatase 6 catalytic subunit            | 1.42        |
| Q8NB37       | <i>GATD1</i>    | Glutamine amidotransferase-like class 1 domain-containing protein 1 | 1.42        |
| Q9UJJ9       | <i>GNPTG</i>    | N-acetylglucosamine-1-phosphotransferase subunit gamma              | 1.39        |
| Q7Z5L9       | <i>IRF2BP2</i>  | Interferon regulatory factor 2-binding protein 2                    | 1.32        |
| A6NFQ2       | <i>TCAF2</i>    | TRPM8 channel-associated factor 2                                   | 1.32        |
| P02794       | <i>FTH1</i>     | Ferritin heavy chain                                                | 1.30        |
| Q15796       | <i>SMAD2</i>    | Mothers against decapentaplegic homolog 2                           | 1.29        |
| Q9UJW0       | <i>DCTN4</i>    | Dynactin subunit 4                                                  | 1.29        |
| O00506       | <i>STK25</i>    | Serine/threonine-protein kinase 25                                  | 1.25        |
| P05155       | <i>SERPING1</i> | Plasma protease C1 inhibitor                                        | 1.24        |
| Q9NR46       | <i>SH3GLB2</i>  | Endophilin-B2                                                       | 1.23        |
| Q9H9E3       | <i>COG4</i>     | Conserved oligomeric Golgi complex subunit 4                        | 1.23        |
| P12277       | <i>CKB</i>      | Creatine kinase B-type                                              | 1.22        |
| O43294       | <i>TGFB1I1</i>  | Transforming growth factor beta-1-induced transcript 1 protein      | 1.22        |
| Q9Y4P3       | <i>TBL2</i>     | Transducin beta-like protein 2                                      | 1.18        |
| P09104       | <i>ENO2</i>     | Gamma-enolase                                                       | 1.18        |
| Q6NUM9       | <i>RETSAT</i>   | All-trans-retinol 13,14-reductase                                   | 1.18        |
| Q96JY6       | <i>PDLIM2</i>   | PDZ and LIM domain protein 2                                        | 1.18        |
| O15530       | <i>PDPK1</i>    | 3-phosphoinositide-dependent protein kinase 1                       | 1.17        |
| P11166       | <i>SLC2A1</i>   | Solute carrier family 2, facilitated glucose transporter member 1   | 1.16        |
| Q96BP3       | <i>PPWD1</i>    | Peptidylprolyl isomerase domain and WD repeat-containing protein 1  | 1.16        |
| Q06033       | <i>ITIH3</i>    | Inter-alpha-trypsin inhibitor heavy chain H3                        | 1.15        |
| Q3LXA3       | <i>TKFC</i>     | Triokinase/FMN cyclase                                              | 1.15        |
| Q96L34       | <i>MARK4</i>    | MAP/microtubule affinity-regulating kinase 4                        | 1.15        |
| P11498       | <i>PC</i>       | Pyruvate carboxylase, mitochondrial                                 | 1.14        |
| Q92615       | <i>LARP4B</i>   | La-related protein 4B                                               | 1.14        |
| P49593       | <i>PPM1F</i>    | Protein phosphatase 1F                                              | 1.14        |
| Q9NVS2       | <i>MRPS18A</i>  | 39S ribosomal protein S18a, mitochondrial                           | 1.14        |
| P17813       | <i>ENG</i>      | Endoglin                                                            | 1.13        |
| P09341       | <i>CXCL1</i>    | Growth-regulated alpha protein                                      | 1.13        |

|         |                  |                                                                            |      |
|---------|------------------|----------------------------------------------------------------------------|------|
| P21399  | <i>ACO1</i>      | Cytoplasmic aconitate hydratase                                            | 1.13 |
| O75368  | <i>SH3BGRL</i>   | SH3 domain-binding glutamic acid-rich-like protein                         | 1.13 |
| Q9UBY9  | <i>HSPB7</i>     | Heat shock protein beta-7                                                  | 1.12 |
| P48163  | <i>ME1</i>       | NADP-dependent malic enzyme                                                | 1.12 |
| P14384  | <i>CPM</i>       | Carboxypeptidase M                                                         | 1.12 |
| P17342  | <i>NPR3</i>      | Atrial natriuretic peptide receptor 3                                      | 1.12 |
| Q9NZN4  | <i>EHD2</i>      | EH domain-containing protein 2                                             | 1.12 |
| Q07960  | <i>ARHGAP1</i>   | Rho GTPase-activating protein 1                                            | 1.12 |
| P08572  | <i>COL4A2</i>    | Collagen alpha-2                                                           | 1.12 |
| Q8IY33  | <i>MICAL2</i>    | MICAL-like protein 2                                                       | 1.12 |
| Q86TI2  | <i>DPP9</i>      | Dipeptidyl peptidase 9                                                     | 1.12 |
| P52789  | <i>HK2</i>       | Hexokinase-2                                                               | 1.12 |
| P07741  | <i>APRT</i>      | Adenine phosphoribosyltransferase                                          | 1.11 |
| P24844  | <i>MYL9</i>      | Myosin regulatory light polypeptide 9                                      | 1.11 |
| Q9P2B2  | <i>PTGFRN</i>    | Prostaglandin F2 receptor negative regulator                               | 1.11 |
| Q9GZU8  | <i>PSME3IP1</i>  | PSME3-interacting protein                                                  | 0.91 |
| Q9BVG4  | <i>PBDC1</i>     | Protein PBDC1                                                              | 0.91 |
| P05166  | <i>PCCB</i>      | Propionyl-CoA carboxylase beta chain, mitochondrial                        | 0.91 |
| O94826  | <i>TOMM70</i>    | Mitochondrial import receptor subunit TOM70                                | 0.91 |
| Q9NPJ3  | <i>ACOT13</i>    | Acyl-coenzyme A thioesterase 13                                            | 0.91 |
| Q12849  | <i>GRSF1</i>     | G-rich sequence factor 1                                                   | 0.91 |
| Q13573  | <i>SNW1</i>      | SNW domain-containing protein 1                                            | 0.91 |
| Q15758  | <i>SLC1A5</i>    | Neutral amino acid transporter B                                           | 0.91 |
| Q96H20  | <i>SNF8</i>      | Vacuolar-sorting protein SNF8                                              | 0.90 |
| P02786  | <i>TFRC</i>      | Transferrin receptor protein 1                                             | 0.90 |
| P22626  | <i>HNRNPA2B1</i> | Heterogeneous nuclear ribonucleoproteins A2/B1                             | 0.90 |
| O43242  | <i>PSMD3</i>     | 26S proteasome non-ATPase regulatory subunit 3                             | 0.90 |
| P56537  | <i>EIF6</i>      | Eukaryotic translation initiation factor 6                                 | 0.90 |
| Q9Y5B9  | <i>SUPT16H</i>   | FACT complex subunit SPT16                                                 | 0.90 |
| Q9NRF8  | <i>CTPS2</i>     | CTP synthase 2                                                             | 0.90 |
| Q96KR1  | <i>ZFR</i>       | Zinc finger RNA-binding protein                                            | 0.90 |
| Q7Z417  | <i>NUFIP2</i>    | Nuclear fragile X mental retardation-interacting protein 2                 | 0.89 |
| Q9B XK5 | <i>BCL2L13</i>   | Bcl-2-like protein 13                                                      | 0.89 |
| Q12907  | <i>LMAN2</i>     | Vesicular integral-membrane protein VIP36                                  | 0.89 |
| O60832  | <i>DKC1</i>      | H/ACA ribonucleoprotein complex subunit DKC1                               | 0.89 |
| E9PAV3  | <i>NACA</i>      | Nascent polypeptide-associated complex subunit alpha, muscle-specific form | 0.89 |
| P12109  | <i>COL6A1</i>    | Collagen alpha-1                                                           | 0.89 |
| Q14839  | <i>CHD4</i>      | Chromodomain-helicase-DNA-binding protein 4                                | 0.89 |
| P30050  | <i>RPL12</i>     | 60S ribosomal protein L12                                                  | 0.89 |
| P67809  | <i>YBX1</i>      | Y-box-binding protein 1                                                    | 0.89 |
| Q9BUQ8  | <i>DDX23</i>     | Probable ATP-dependent RNA helicase DDX23                                  | 0.89 |

|        |                 |                                                                      |      |
|--------|-----------------|----------------------------------------------------------------------|------|
| P04179 | <i>SOD2</i>     | Superoxide dismutase [Mn], mitochondrial                             | 0.88 |
| Q96EL3 | <i>MRPL53</i>   | 39S ribosomal protein L53, mitochondrial                             | 0.88 |
| Q07021 | <i>C1QBP</i>    | Complement component 1 Q subcomponent-binding protein, mitochondrial | 0.88 |
| P60660 | <i>MYL6</i>     | Myosin light polypeptide 6                                           | 0.87 |
| P82650 | <i>MRPS22</i>   | 28S ribosomal protein S22, mitochondrial                             | 0.87 |
| Q14444 | <i>CAPRIN1</i>  | Caprin-1                                                             | 0.87 |
| Q99757 | <i>TXN2</i>     | Thioredoxin, mitochondrial                                           | 0.87 |
| P21397 | <i>MAOA</i>     | Amine oxidase [flavin-containing] A                                  | 0.87 |
| Q6NUK1 | <i>SLC25A24</i> | Calcium-binding mitochondrial carrier protein SCaMC-1                | 0.87 |
| P61812 | <i>TGFB2</i>    | Transforming growth factor beta-2 proprotein                         | 0.86 |
| Q13243 | <i>SRSF5</i>    | Serine/arginine-rich splicing factor 5                               | 0.86 |
| Q9UMY1 | <i>NOL7</i>     | Nucleolar protein 7                                                  | 0.86 |
| O14817 | <i>TSPAN4</i>   | Tetraspanin-4                                                        | 0.86 |
| Q9UII2 | <i>ATP5IF1</i>  | ATPase inhibitor, mitochondrial                                      | 0.86 |
| Q10471 | <i>GALNT2</i>   | Polypeptide N-acetylgalactosaminyltransferase 2                      | 0.86 |
| Q92520 | <i>FAM3C</i>    | Protein FAM3C                                                        | 0.86 |
| Q13610 | <i>PWPI</i>     | Periodic tryptophan protein 1 homolog                                | 0.85 |
| P84090 | <i>ERH</i>      | Enhancer of rudimentary homolog                                      | 0.85 |
| P67936 | <i>TPM4</i>     | Tropomyosin alpha-4 chain                                            | 0.85 |
| Q14978 | <i>NOLC1</i>    | Nucleolar and coiled-body phosphoprotein 1                           | 0.85 |
| O14494 | <i>PLPP1</i>    | Phospholipid phosphatase 1                                           | 0.85 |
| Q9NX58 | <i>LYAR</i>     | Cell growth-regulating nucleolar protein                             | 0.85 |
| Q9NY27 | <i>PPP4R2</i>   | Serine/threonine-protein phosphatase 4 regulatory subunit 2          | 0.85 |
| Q5BKZ1 | <i>ZNF326</i>   | DBIRD complex subunit ZNF326                                         | 0.83 |
| P20674 | <i>COX5A</i>    | Cytochrome c oxidase subunit 5A, mitochondrial                       | 0.83 |
| P09493 | <i>TPM1</i>     | Tropomyosin alpha-1 chain                                            | 0.83 |
| P63098 | <i>PPP3R1</i>   | Calcineurin subunit B type 1                                         | 0.82 |
| Q96EI5 | <i>TCEAL4</i>   | Transcription elongation factor A protein-like 4                     | 0.82 |
| Q9NPJ1 | <i>MKKS</i>     | McKusick-Kaufman/Bardet-Biedl syndromes putative chaperonin          | 0.82 |
| P09497 | <i>CLTB</i>     | Clathrin light chain B                                               | 0.82 |
| O15155 | <i>BET1</i>     | BET1 homolog                                                         | 0.81 |
| P63313 | <i>TMSB10</i>   | Thymosin beta-10                                                     | 0.81 |
| Q15293 | <i>RCN1</i>     | Reticulocalbin-1                                                     | 0.81 |
| Q15018 | <i>ABRAXAS2</i> | BRISC complex subunit Abraxas 2                                      | 0.81 |
| P10606 | <i>COX5B</i>    | Cytochrome c oxidase subunit 5B, mitochondrial                       | 0.80 |
| P07919 | <i>UQCRH</i>    | Cytochrome b-c1 complex subunit 6, mitochondrial                     | 0.80 |
| P49755 | <i>TMED10</i>   | Transmembrane emp24 domain-containing protein 10                     | 0.80 |
| Q99715 | <i>COL12A1</i>  | Collagen alpha-1                                                     | 0.80 |
| P05114 | <i>HMGN1</i>    | Non-histone chromosomal protein HMG-14                               | 0.79 |
| Q9P2N5 | <i>RBM27</i>    | RNA-binding protein 27                                               | 0.79 |

|        |                |                                                              |      |
|--------|----------------|--------------------------------------------------------------|------|
| Q9H0A0 | <i>NAT10</i>   | RNA cytidine acetyltransferase                               | 0.79 |
| P05997 | <i>COL5A2</i>  | Collagen alpha-2                                             | 0.79 |
| P60903 | <i>S100A10</i> | Protein S100-A10                                             | 0.79 |
| P30049 | <i>ATP5F1D</i> | ATP synthase subunit delta, mitochondrial                    | 0.78 |
| P07602 | <i>PSAP</i>    | Prosaposin                                                   | 0.77 |
| P20962 | <i>PTMS</i>    | Parathymosin                                                 | 0.76 |
| P08123 | <i>COL1A2</i>  | Collagen alpha-2                                             | 0.75 |
| P09496 | <i>CLTA</i>    | Clathrin light chain A                                       | 0.75 |
| Q02818 | <i>NUCB1</i>   | Nucleobindin-1                                               | 0.75 |
| P09486 | <i>SPARC</i>   | SPARC                                                        | 0.75 |
| P80723 | <i>BASP1</i>   | Brain acid soluble protein 1                                 | 0.74 |
| P21127 | <i>CDK11B</i>  | Cyclin-dependent kinase 11B                                  | 0.73 |
| P0DP25 | <i>CALM3</i>   | Calmodulin-3                                                 | 0.72 |
| Q9GZT3 | <i>SLIRP</i>   | SRA stem-loop-interacting RNA-binding protein, mitochondrial | 0.71 |
| P02461 | <i>COL3A1</i>  | collagen type III, alpha-1 chain                             | 0.71 |
| Q96A49 | <i>SYAP1</i>   | Synapse-associated protein 1                                 | 0.69 |
| P20908 | <i>COL5A1</i>  | Collagen alpha-1(V)                                          | 0.67 |
| Q15121 | <i>PEA15</i>   | Astrocytic phosphoprotein PEA-15                             | 0.63 |
| Q8N5N7 | <i>MRPL50</i>  | 39S ribosomal protein L50, mitochondrial                     | 0.62 |
| P02452 | <i>COL1A1</i>  | Collagen alpha-1                                             | 0.53 |
