# Supplementary material for: Integrative Proteomic and Phosphoproteomic Analyses of Hypoxia-Treated Pulmonary Artery Smooth Muscle Cells
Source: Proteomes. 2022 Jun 28;10(3):23. doi: 10.3390/proteomes10030023 (PMC9326561; doi:10.3390/proteomes10030023)
Supplement: Supplementary file 1 [file proteomes-10-00023-s001.zip]

Archive with 5 entries (5 files):
- Supplementary figures.pdf
- Table S1-Protein Discoverer software searching result for proteomic analysis.xlsx
- Table S2.pdf
- Table S3-Protein Discoverer software searching result for phosphoproteomic analysis.xlsx
- Table S4.xls
