# Supplementary material for: Integrative Proteomic and Phosphoproteomic Analyses of Hypoxia-Treated Pulmonary Artery Smooth Muscle Cells
Source: Proteomes. 2022 Jun 28;10(3):23. doi: 10.3390/proteomes10030023 (PMC9326561; doi:10.3390/proteomes10030023)
Supplement: Supplementary file 1 [file proteomes-10-00023-s001.zip › Table S1-Protein Discoverer software searching result for proteomic analysis.xlsx]

## Sheet: Proteins
Checked	Protein FDR Confidence: Combined	Master	Accession	Description	Exp. q-value: Combined	Sum PEP Score	Coverage [%]	# Peptides	# PSMs	# Unique Peptides	# Protein Groups	# AAs	MW [kDa]	calc. pI	Score Sequest HT: Sequest HT	# Peptides (by Search Engine): Sequest HT	# Razor Peptides	Abundances (Scaled): F9: 126, Sample	Abundances (Scaled): F9: 127C, Sample	Abundances (Scaled): F9: 128N, Sample	Abundances (Scaled): F9: 130N, Sample	Abundances (Scaled): F9: 130C, Sample	Abundances (Scaled): F9: 131, Sample	Found in Fraction: F9.1	Found in Fraction: F9.2	Found in Fraction: F9.3	Found in Fraction: F9.4	Found in Fraction: F9.5	Found in Fraction: F9.6	Found in Fraction: F9.7	Found in Fraction: F9.8	Found in Fraction: F9.9
FALSE	High	Master Protein	Q15149	Plectin OS=Homo sapiens OX=9606 GN=PLEC PE=1 SV=3	0	1919.23	64	288	1027	285	1	4684	531.5	5.96	3357.87	288	3	103.5	95.9	101.4	93.8	101.8	108.9	High	High	High	High	High	High	High	High	High
FALSE	High	Master Protein	Q09666	Neuroblast differentiation-associated protein AHNAK OS=Homo sapiens OX=9606 GN=AHNAK PE=1 SV=2	0	1848.05	75	267	685	265	1	5890	628.7	6.15	2141.36	267	1	103.5	99.8	102.3	98.8	102.7	99	High	High	High	High	High	High	High	High	High
FALSE	High	Master Protein	P21333	Filamin-A OS=Homo sapiens OX=9606 GN=FLNA PE=1 SV=4	0	1138.34	66	136	462	121	1	2647	280.6	6.06	1705.2	136	15	100.3	99.3	101.1	100.4	101.2	100.8	High	High	High	High	High	High	High	High	High
FALSE	High	Master Protein	P35579	Myosin-9 OS=Homo sapiens OX=9606 GN=MYH9 PE=1 SV=4	0	1065.44	60	124	523	104	1	1960	226.4	5.6	1800.44	124	22	101.4	104.5	98.2	104.7	98.3	89.7	High	High	High	High	High	High	High	High	High
FALSE	High	Master Protein	Q13813	Spectrin alpha chain, non-erythrocytic 1 OS=Homo sapiens OX=9606 GN=SPTAN1 PE=1 SV=3	0	986.023	65	138	335	138	1	2472	284.4	5.35	1227	138	0	103.8	99.5	102.7	96.7	101	100.5	High	High	High	High	High	High	High	High	High
FALSE	High	Master Protein	Q01082	Spectrin beta chain, non-erythrocytic 1 OS=Homo sapiens OX=9606 GN=SPTBN1 PE=1 SV=2	0	895.163	62	125	248	118	1	2364	274.4	5.57	898.19	125	7	102.1	97.8	100.7	96.5	102.5	103.4	High	High	High	High	High	High	High	High	High
FALSE	High	Master Protein	Q14315	Filamin-C OS=Homo sapiens OX=9606 GN=FLNC PE=1 SV=3	0	764.21	52	114	273	99	1	2725	290.8	5.97	961.14	114	3	98.3	98.2	97.7	100.1	100.1	99.2	High	High	High	High	High	High	High	High	Not Found
FALSE	High	Master Protein	Q14204	Cytoplasmic dynein 1 heavy chain 1 OS=Homo sapiens OX=9606 GN=DYNC1H1 PE=1 SV=5	0	737.384	34	131	201	131	1	4646	532.1	6.4	686.28	131	0	97	102.6	96.9	103.7	98.8	101.1	High	High	High	High	High	High	High	High	High
FALSE	High	Master Protein	Q9Y490	Talin-1 OS=Homo sapiens OX=9606 GN=TLN1 PE=1 SV=3	0	701.7	55	105	220	96	1	2541	269.6	6.07	788.29	105	10	94.9	100.2	95.9	103.2	96.2	106.3	High	High	High	High	High	High	High	High	High
FALSE	High	Master Protein	O75369	Filamin-B OS=Homo sapiens OX=9606 GN=FLNB PE=1 SV=2	0	647.863	50	104	207	92	1	2602	278	5.73	725.33	104	0	98.3	98.9	97.9	99.8	102.6	102.5	High	High	High	High	High	High	High	High	Not Found
FALSE	High	Master Protein	P12814	Alpha-actinin-1 OS=Homo sapiens OX=9606 GN=ACTN1 PE=1 SV=2	0	527.028	68	54	240	37	1	892	103	5.41	826.01	54	0	99.5	101.4	98.4	99.5	100.1	104.8	High	High	High	High	High	High	High	High	High
FALSE	High	Master Protein	O43707	Alpha-actinin-4 OS=Homo sapiens OX=9606 GN=ACTN4 PE=1 SV=2	0	520.999	70	59	249	41	1	911	104.8	5.44	870.12	59	19	99.3	101.5	99.7	100.4	98.1	105.5	High	High	High	High	High	High	High	High	Not Found
FALSE	High	Master Protein	Q00610	Clathrin heavy chain 1 OS=Homo sapiens OX=9606 GN=CLTC PE=1 SV=5	0	477.928	49	63	160	63	1	1675	191.5	5.69	580.46	63	0	98.1	100.6	99.9	99.6	101.3	100.7	High	High	High	High	High	High	High	High	High
FALSE	High	Master Protein	P02751	Fibronectin OS=Homo sapiens OX=9606 GN=FN1 PE=1 SV=5	0	416.327	37	66	127	66	1	2477	272.2	5.5	474.83	66	0	102.8	107.3	103	100.5	101	95.7	Not Found	High	High	High	High	High	High	High	High
FALSE	High	Master Protein	P14618	Pyruvate kinase PKM OS=Homo sapiens OX=9606 GN=PKM PE=1 SV=4	0	383.072	71	35	244	35	1	531	57.9	7.84	891.25	35	0	90.7	101.2	94.9	108	95	101.6	High	High	High	High	High	High	High	High	Not Found
FALSE	High	Master Protein	P02545	Prelamin-A/C OS=Homo sapiens OX=9606 GN=LMNA PE=1 SV=1	0	382.887	67	46	254	44	1	664	74.1	7.02	890.4	46	2	103.6	95.8	104	95.4	102.8	104.2	High	High	High	High	High	High	High	High	High
FALSE	High	Master Protein	Q9NZM1	Myoferlin OS=Homo sapiens OX=9606 GN=MYOF PE=1 SV=1	0	376.687	42	76	116	76	1	2061	234.6	6.18	388.02	76	0	107.9	102.4	102.9	100.8	102.4	100.5	High	High	High	High	High	High	High	High	Not Found
FALSE	High	Master Protein	P46940	Ras GTPase-activating-like protein IQGAP1 OS=Homo sapiens OX=9606 GN=IQGAP1 PE=1 SV=1	0	373.721	48	61	102	61	1	1657	189.1	6.48	350.92	61	0	98.1	101.8	97.6	103.1	99.3	95.1	High	High	High	High	High	High	High	High	Not Found
FALSE	High	Master Protein	P08670	Vimentin OS=Homo sapiens OX=9606 GN=VIM PE=1 SV=4	0	372.765	75	38	904	35	1	466	53.6	5.12	2777.94	38	3	105	94.2	103.4	94.1	101.6	104.5	High	High	High	High	High	High	High	High	High
FALSE	High	Master Protein	P46821	Microtubule-associated protein 1B OS=Homo sapiens OX=9606 GN=MAP1B PE=1 SV=2	0	367.865	35	62	98	60	1	2468	270.5	4.81	362.57	62	2	102.7	106.9	104.8	103.7	96.5	87.9	High	High	High	High	High	High	High	High	Not Found
FALSE	High	Master Protein	P60709	Actin, cytoplasmic 1 OS=Homo sapiens OX=9606 GN=ACTB PE=1 SV=1	0	363.305	69	21	790	9	1	375	41.7	5.48	2620.13	21	16	101.6	96.7	101.5	97.9	102.6	109.8	High	High	High	High	High	High	High	High	High
FALSE	High	Master Protein	P14625	Endoplasmin OS=Homo sapiens OX=9606 GN=HSP90B1 PE=1 SV=1	0	355.46	56	44	243	43	1	803	92.4	4.84	809.34	44	1	105.8	102	104.6	98.3	100	92.5	High	High	High	High	High	High	High	High	High
FALSE	High	Master Protein	P08238	Heat shock protein HSP 90-beta OS=Homo sapiens OX=9606 GN=HSP90AB1 PE=1 SV=4	0	352.11	57	40	192	24	1	724	83.2	5.03	635.23	40	17	96	104.3	100.4	102.8	91.7	89.2	High	High	High	High	High	High	High	High	Not Found
FALSE	High	Master Protein	P07996	Thrombospondin-1 OS=Homo sapiens OX=9606 GN=THBS1 PE=1 SV=2	0	336.346	53	48	128	47	1	1170	129.3	4.94	463.21	48	1	106.3	102.1	102.3	98.6	102.9	99.4	High	High	High	High	High	High	High	High	Not Found
FALSE	High	Master Protein	P07900	Heat shock protein HSP 90-alpha OS=Homo sapiens OX=9606 GN=HSP90AA1 PE=1 SV=5	0	334.276	54	39	186	23	1	732	84.6	5.02	608.08	39	1	96.2	105	99.5	107	94.9	85.9	High	High	High	High	High	High	High	High	Not Found
FALSE	High	Master Protein	P07814	Bifunctional glutamate/proline--tRNA ligase OS=Homo sapiens OX=9606 GN=EPRS1 PE=1 SV=5	0	333.093	45	57	97	56	1	1512	170.5	7.33	322.82	57	1	99.6	103.9	100.5	103.5	96.9	92.8	High	High	High	High	High	High	High	High	Not Found
FALSE	High	Master Protein	P10809	60 kDa heat shock protein, mitochondrial OS=Homo sapiens OX=9606 GN=HSPD1 PE=1 SV=2	0	332.876	79	34	138	34	1	573	61	5.87	534.68	34	0	110.5	98.1	105.5	93	102.5	99.7	Not Found	High	High	High	High	High	High	High	Not Found
FALSE	High	Master Protein	P11021	Endoplasmic reticulum chaperone BiP OS=Homo sapiens OX=9606 GN=HSPA5 PE=1 SV=2	0	332.844	59	40	208	37	1	654	72.3	5.16	708.9	40	3	104.5	101.1	104.3	99.2	98.4	91.3	High	High	High	High	High	High	High	High	High
FALSE	High	Master Protein	P12111	Collagen alpha-3(VI) chain OS=Homo sapiens OX=9606 GN=COL6A3 PE=1 SV=5	0	332.35	25	69	102	69	1	3177	343.5	6.68	321.8	69	0	94.6	93.8	96.3	100.1	101.9	104.5	High	High	High	High	High	High	High	High	Not Found
FALSE	High	Master Protein	Q8WWI1	LIM domain only protein 7 OS=Homo sapiens OX=9606 GN=LMO7 PE=1 SV=3	0	332.315	40	57	102	57	1	1683	192.6	8.09	355.68	57	0	104.2	99.1	102.5	97.2	103.1	101.9	High	High	High	High	High	High	High	High	High
FALSE	High	Master Protein	P13639	Elongation factor 2 OS=Homo sapiens OX=9606 GN=EEF2 PE=1 SV=4	0	325.976	57	44	170	43	1	858	95.3	6.83	553.18	44	1	93.1	100.1	96	105.7	95	94.1	High	High	High	High	High	High	High	High	High
FALSE	High	Master Protein	P11142	Heat shock cognate 71 kDa protein OS=Homo sapiens OX=9606 GN=HSPA8 PE=1 SV=1	0	321.395	63	35	217	27	1	646	70.9	5.52	759.13	35	6	101.1	106.4	103.2	99.7	91.3	80	High	High	High	High	High	High	High	High	High
FALSE	High	Master Protein	P18206	Vinculin OS=Homo sapiens OX=9606 GN=VCL PE=1 SV=4	0	320.915	55	56	113	56	1	1134	123.7	5.66	343.67	56	0	90.7	99.3	94	104.6	94	101	High	High	High	High	High	High	High	High	High
FALSE	High	Master Protein	P35580	Myosin-10 OS=Homo sapiens OX=9606 GN=MYH10 PE=1 SV=3	0	313.999	33	61	110	43	1	1976	228.9	5.54	363.89	61	1	100.6	102.1	96.2	100.4	98.8	99	High	High	High	High	High	High	High	High	High
FALSE	High	Master Protein	P49327	Fatty acid synthase OS=Homo sapiens OX=9606 GN=FASN PE=1 SV=3	0	310.424	30	56	72	56	1	2511	273.3	6.44	247.14	56	0	92.8	101.4	95.4	104.7	96.2	104	Not Found	High	High	High	High	High	High	High	Not Found
FALSE	High	Master Protein	P07237	Protein disulfide-isomerase OS=Homo sapiens OX=9606 GN=P4HB PE=1 SV=3	0	299.988	69	38	262	38	1	508	57.1	4.87	846.28	38	0	104.7	99.7	106.2	102.3	101.9	85.8	High	High	High	High	High	High	High	High	High
FALSE	High	Master Protein	P08133	Annexin A6 OS=Homo sapiens OX=9606 GN=ANXA6 PE=1 SV=3	0	290.166	65	39	136	39	1	673	75.8	5.6	489.64	39	0	107.7	104	103.1	101.3	103	93.5	High	High	High	High	High	High	High	High	High
FALSE	High	Master Protein	P11216	Glycogen phosphorylase, brain form OS=Homo sapiens OX=9606 GN=PYGB PE=1 SV=5	0	283.345	57	43	81	33	1	843	96.6	6.86	269.1	43	12	99.4	103.2	96.3	105.6	99.7	92.7	High	High	High	High	High	High	High	High	Not Found
FALSE	High	Master Protein	P00558	Phosphoglycerate kinase 1 OS=Homo sapiens OX=9606 GN=PGK1 PE=1 SV=3	0	278.677	77	30	153	30	1	417	44.6	8.1	514.49	30	0	88.8	98.9	95.2	112.3	97.6	94.6	High	High	High	High	High	High	High	High	Not Found
FALSE	High	Master Protein	P15144	Aminopeptidase N OS=Homo sapiens OX=9606 GN=ANPEP PE=1 SV=4	0	278.671	38	35	102	35	1	967	109.5	5.48	353.85	35	0	104.4	98.6	100.2	98.8	105.5	105.3	High	High	High	High	High	High	High	High	Not Found
FALSE	High	Master Protein	P05023	Sodium/potassium-transporting ATPase subunit alpha-1 OS=Homo sapiens OX=9606 GN=ATP1A1 PE=1 SV=1	0	274.009	41	36	83	36	1	1023	112.8	5.49	298.79	36	0	106	102.3	99.2	102.3	102.3	101.7	High	High	High	High	High	High	High	High	Not Found
FALSE	High	Master Protein	Q14764	Major vault protein OS=Homo sapiens OX=9606 GN=MVP PE=1 SV=4	0	269.477	50	35	80	35	1	893	99.3	5.48	305.09	35	0	94.8	101.5	95.6	100.5	97.9	109.3	High	High	High	High	High	High	High	High	High
FALSE	High	Master Protein	Q02952	A-kinase anchor protein 12 OS=Homo sapiens OX=9606 GN=AKAP12 PE=1 SV=4	0	266.396	33	39	52	39	1	1782	191.4	4.41	215.98	39	0	94.3	97	91.9	102.1	96.5	99.8	High	High	High	High	High	High	High	High	Not Found
FALSE	High	Master Protein	P55072	Transitional endoplasmic reticulum ATPase OS=Homo sapiens OX=9606 GN=VCP PE=1 SV=4	0	264.764	60	43	120	43	1	806	89.3	5.26	390.15	43	0	98.2	100.6	99.9	98.2	95.7	106.7	High	High	High	High	High	High	High	High	High
FALSE	High	Master Protein	P06733	Alpha-enolase OS=Homo sapiens OX=9606 GN=ENO1 PE=1 SV=2	0	261.48	73	25	177	21	1	434	47.1	7.39	630.88	25	4	90.3	99.1	95.5	107.2	95.2	97.3	High	High	High	High	High	High	High	High	High
FALSE	High	Master Protein	Q00341	Vigilin OS=Homo sapiens OX=9606 GN=HDLBP PE=1 SV=2	0	259.777	41	42	77	42	1	1268	141.4	6.87	267.73	42	0	100.5	99.2	102	97.4	100.4	99.6	High	High	High	High	High	High	High	High	High
FALSE	High	Master Protein	P68104	Elongation factor 1-alpha 1 OS=Homo sapiens OX=9606 GN=EEF1A1 PE=1 SV=1	0	257.95	59	21	207	21	1	462	50.1	9.01	700.61	21	0	94.4	98.8	97.7	103.1	94	87.5	High	High	High	High	High	High	High	High	High
FALSE	High	Master Protein	P06576	ATP synthase subunit beta, mitochondrial OS=Homo sapiens OX=9606 GN=ATP5F1B PE=1 SV=3	0	257.38	64	22	95	22	1	529	56.5	5.4	345.48	22	0	103.7	96.6	101.5	94.3	108.7	104	Not Found	Not Found	High	High	High	High	High	High	High
FALSE	High	Master Protein	Q16555	Dihydropyrimidinase-related protein 2 OS=Homo sapiens OX=9606 GN=DPYSL2 PE=1 SV=1	0	249.863	72	27	78	23	1	572	62.3	6.38	314.17	27	5	90.8	101.3	94.3	105.6	94.7	99	Not Found	High	High	High	High	High	High	High	Not Found
FALSE	High	Master Protein	P04075	Fructose-bisphosphate aldolase A OS=Homo sapiens OX=9606 GN=ALDOA PE=1 SV=2	0	248.398	82	25	197	19	1	364	39.4	8.09	705.46	25	6	91.2	97.4	94.7	104.7	97.6	107.8	Not Found	High	High	High	High	High	High	High	High
FALSE	High	Master Protein	P38646	Stress-70 protein, mitochondrial OS=Homo sapiens OX=9606 GN=HSPA9 PE=1 SV=2	0	247.459	57	34	73	33	1	679	73.6	6.16	257.11	34	0	107.9	99.4	103.9	100.6	104	94.1	Not Found	High	High	High	High	High	High	High	High
FALSE	High	Master Protein	P68371	Tubulin beta-4B chain OS=Homo sapiens OX=9606 GN=TUBB4B PE=1 SV=1	0	246.62	65	21	199	3	1	445	49.8	4.89	659.02	21	26	91	100.1	94.6	105	95.6	98.6	Not Found	Not Found	High	High	High	High	High	Not Found	Not Found
FALSE	High	Master Protein	Q9P2E9	Ribosome-binding protein 1 OS=Homo sapiens OX=9606 GN=RRBP1 PE=1 SV=5	0	244.21	37	45	63	44	1	1410	152.4	8.6	219.54	45	1	107.4	97.5	106	94.5	100.3	103.1	High	High	High	High	High	High	High	Not Found	High
FALSE	High	Master Protein	P21980	Protein-glutamine gamma-glutamyltransferase 2 OS=Homo sapiens OX=9606 GN=TGM2 PE=1 SV=2	0	243.336	53	29	105	29	1	687	77.3	5.22	359.24	29	0	92.7	102.9	94.8	105.7	94.4	92.3	High	High	High	High	High	High	High	High	High
FALSE	High	Master Protein	Q13885	Tubulin beta-2A chain OS=Homo sapiens OX=9606 GN=TUBB2A PE=1 SV=1	0	243.26	63	20	193	3	1	445	49.9	4.89	636.9	20	3	87.1	94.6	96.6	108.1	95.7	94.7	Not Found	Not Found	Not Found	High	High	High	Not Found	Not Found	Not Found
FALSE	High	Master Protein	P13667	Protein disulfide-isomerase A4 OS=Homo sapiens OX=9606 GN=PDIA4 PE=1 SV=2	0	240.295	57	36	113	36	1	645	72.9	5.07	356.99	36	0	103.9	98	103.1	93.6	103.9	101	High	High	High	High	High	High	High	High	Not Found
FALSE	High	Master Protein	O00469	Procollagen-lysine,2-oxoglutarate 5-dioxygenase 2 OS=Homo sapiens OX=9606 GN=PLOD2 PE=1 SV=2	0	239.662	52	34	155	34	1	737	84.6	6.71	478.8	34	0	99.7	93.7	97.2	97.3	110.1	113.9	High	High	High	High	High	High	High	High	High
FALSE	High	Master Protein	P07355	Annexin A2 OS=Homo sapiens OX=9606 GN=ANXA2 PE=1 SV=2	0	236.061	69	26	399	26	1	339	38.6	7.75	1340.92	26	0	105.5	99.7	102.6	100.8	105.7	100.4	High	High	High	High	High	High	High	High	High
FALSE	High	Master Protein	P78371	T-complex protein 1 subunit beta OS=Homo sapiens OX=9606 GN=CCT2 PE=1 SV=4	0	235.793	60	23	65	23	1	535	57.5	6.46	257.88	23	0	95.9	103.3	97.4	102.6	95.9	97.7	High	High	High	High	High	High	High	High	High
FALSE	High	Master Protein	P34932	Heat shock 70 kDa protein 4 OS=Homo sapiens OX=9606 GN=HSPA4 PE=1 SV=4	0	234.959	54	38	62	36	1	840	94.3	5.19	214.37	38	2	98.6	104.8	98.9	105.9	92.5	85.5	High	High	High	High	High	High	High	High	Not Found
FALSE	High	Master Protein	Q07954	Prolow-density lipoprotein receptor-related protein 1 OS=Homo sapiens OX=9606 GN=LRP1 PE=1 SV=2	0	232.836	14	45	64	45	1	4544	504.3	5.39	206.55	45	0	105.6	100.7	100.6	102.9	104	110.7	High	High	High	High	High	High	High	High	Not Found
FALSE	High	Master Protein	P53396	ATP-citrate synthase OS=Homo sapiens OX=9606 GN=ACLY PE=1 SV=3	0	232.543	48	45	71	45	1	1101	120.8	7.33	242.56	45	0	94.4	101.2	95.6	103.9	96.7	99.3	Not Found	High	High	High	High	High	High	High	Not Found
FALSE	High	Master Protein	P22314	Ubiquitin-like modifier-activating enzyme 1 OS=Homo sapiens OX=9606 GN=UBA1 PE=1 SV=3	0	230.43	46	37	77	37	1	1058	117.8	5.76	279.95	37	0	95	101.6	98.3	102.9	97.1	99.6	High	High	High	High	High	High	High	High	Not Found
FALSE	High	Master Protein	P19367	Hexokinase-1 OS=Homo sapiens OX=9606 GN=HK1 PE=1 SV=3	0	230.101	49	43	73	40	1	917	102.4	6.8	238.01	43	2	105.3	98.1	99.6	96.1	107.2	106.1	High	High	High	High	High	High	High	High	Not Found
FALSE	High	Master Protein	P07437	Tubulin beta chain OS=Homo sapiens OX=9606 GN=TUBB PE=1 SV=2	0	226.865	65	21	196	4	1	444	49.6	4.89	641.43	21	2	90.1	99	95	102.8	95.8	103.5	Not Found	Not Found	Not Found	High	High	High	High	High	Not Found
FALSE	High	Master Protein	P27816	Microtubule-associated protein 4 OS=Homo sapiens OX=9606 GN=MAP4 PE=1 SV=3	0	226.04	42	41	73	41	1	1152	120.9	5.43	238.44	41	0	99.1	106.5	102.7	101.3	93.6	92.4	High	Not Found	High	High	High	High	High	High	Not Found
FALSE	High	Master Protein	Q7KZF4	Staphylococcal nuclease domain-containing protein 1 OS=Homo sapiens OX=9606 GN=SND1 PE=1 SV=1	0	225.286	52	38	81	38	1	910	101.9	7.17	270.08	38	0	99	99	99	99.4	99.8	105.8	High	High	High	High	High	High	High	High	High
FALSE	High	Master Protein	P30101	Protein disulfide-isomerase A3 OS=Homo sapiens OX=9606 GN=PDIA3 PE=1 SV=4	0	223.305	61	30	164	30	1	505	56.7	6.35	532.58	30	0	103.8	96.9	104.6	96.4	103.5	98.3	High	High	High	High	High	High	High	High	High
FALSE	High	Master Protein	Q92616	eIF-2-alpha kinase activator GCN1 OS=Homo sapiens OX=9606 GN=GCN1 PE=1 SV=6	0	220.09	20	45	56	45	1	2671	292.6	7.47	186.99	45	0	95.8	100.7	95.4	101.2	98	107	Not Found	High	High	High	High	High	High	High	Not Found
FALSE	High	Master Protein	Q07065	Cytoskeleton-associated protein 4 OS=Homo sapiens OX=9606 GN=CKAP4 PE=1 SV=2	0	217.597	65	36	84	34	1	602	66	5.92	309.94	36	1	121.3	101.5	111.5	91.9	102.5	93	Not Found	High	High	High	High	High	High	High	High
FALSE	High	Master Protein	Q14697	Neutral alpha-glucosidase AB OS=Homo sapiens OX=9606 GN=GANAB PE=1 SV=3	0	215.704	43	33	74	33	1	944	106.8	6.14	257.35	33	0	102.9	98.1	100.9	98.7	105.5	99.5	High	High	High	High	High	High	High	High	High
FALSE	High	Master Protein	P26038	Moesin OS=Homo sapiens OX=9606 GN=MSN PE=1 SV=3	0	213.723	60	39	152	27	1	577	67.8	6.4	471.98	39	14	95.1	99.8	95.2	101.1	97.8	106.9	High	High	High	High	High	High	High	High	High
FALSE	High	Master Protein	O75083	WD repeat-containing protein 1 OS=Homo sapiens OX=9606 GN=WDR1 PE=1 SV=4	0	210.127	58	28	78	28	1	606	66.2	6.65	294.59	28	0	93.8	99.3	99.9	107.5	98.9	94.2	Not Found	High	High	High	High	High	High	High	Not Found
FALSE	High	Master Protein	P50991	T-complex protein 1 subunit delta OS=Homo sapiens OX=9606 GN=CCT4 PE=1 SV=4	0	209.705	65	30	88	29	1	539	57.9	7.83	279.89	30	1	96	99.7	95.9	101.8	98.2	101.4	Not Found	High	High	High	High	High	High	High	Not Found
FALSE	High	Master Protein	Q16891	MICOS complex subunit MIC60 OS=Homo sapiens OX=9606 GN=IMMT PE=1 SV=1	0	209.154	51	34	61	34	1	758	83.6	6.48	204.87	34	0	101.3	98.7	103.3	96.7	101.6	108.6	High	High	High	High	High	High	High	High	High
FALSE	High	Master Protein	P27797	Calreticulin OS=Homo sapiens OX=9606 GN=CALR PE=1 SV=1	0	205.731	59	22	133	22	1	417	48.1	4.44	429.41	22	0	105.3	103.9	104.8	100.7	95.8	88.6	Not Found	High	High	High	High	High	High	High	High
FALSE	High	Master Protein	Q9Y2D5	A-kinase anchor protein 2 OS=Homo sapiens OX=9606 GN=AKAP2 PE=1 SV=3	0	205.009	41	31	78	31	1	859	94.6	5.11	280.94	31	0	104.6	100.3	99.9	95.5	100.8	108.8	Not Found	High	High	High	High	High	High	High	Not Found
FALSE	High	Master Protein	P60842	Eukaryotic initiation factor 4A-I OS=Homo sapiens OX=9606 GN=EIF4A1 PE=1 SV=1	0	204.916	61	22	76	11	1	406	46.1	5.48	279.7	22	13	94.6	96	95.2	100.9	98	101.5	Not Found	High	High	High	High	High	High	High	Not Found
FALSE	High	Master Protein	Q71U36	Tubulin alpha-1A chain OS=Homo sapiens OX=9606 GN=TUBA1A PE=1 SV=1	0	202.537	60	20	184	1	1	451	50.1	5.06	592.19	20	25	90.8	96.8	95.7	103.5	95.6	99.9	Not Found	Not Found	Not Found	Not Found	Not Found	Not Found	Not Found	High	Not Found
FALSE	High	Master Protein	P50990	T-complex protein 1 subunit theta OS=Homo sapiens OX=9606 GN=CCT8 PE=1 SV=4	0	202.348	70	33	74	33	1	548	59.6	5.6	251.09	33	0	95.5	101.2	97.8	102.5	97.1	99.9	High	High	High	High	High	High	High	High	Not Found
FALSE	High	Master Protein	P04406	Glyceraldehyde-3-phosphate dehydrogenase OS=Homo sapiens OX=9606 GN=GAPDH PE=1 SV=3	0	201.994	72	18	193	18	1	335	36	8.46	641.35	18	0	89.7	94.7	93.4	108.2	98.2	107.5	Not Found	Not Found	Not Found	High	High	High	High	High	High
FALSE	High	Master Protein	P08729	Keratin, type II cytoskeletal 7 OS=Homo sapiens OX=9606 GN=KRT7 PE=1 SV=5	0	200.445	58	29	169	24	1	469	51.4	5.48	495.02	29	2	104.5	95.5	101.5	99.2	108.5	98.7	High	High	High	High	High	High	High	High	High
FALSE	High	Master Protein	Q9BQE3	Tubulin alpha-1C chain OS=Homo sapiens OX=9606 GN=TUBA1C PE=1 SV=1	0	199.053	60	20	172	2	1	449	49.9	5.1	539.29	20	1	80.8	92.6	89.9	102.1	95.9	120.5	Not Found	Not Found	Not Found	Not Found	High	High	High	Not Found	Not Found
FALSE	High	Master Protein	O60763	General vesicular transport factor p115 OS=Homo sapiens OX=9606 GN=USO1 PE=1 SV=2	0	198.747	41	31	60	31	1	962	107.8	4.91	229.92	31	0	100.5	103.9	98.7	102.3	98.9	94	High	High	High	High	High	High	High	High	Not Found
FALSE	High	Master Protein	P13797	Plastin-3 OS=Homo sapiens OX=9606 GN=PLS3 PE=1 SV=4	0	198.079	59	30	62	30	1	630	70.8	5.6	207.73	30	0	95.1	104.5	96.6	103.3	95.1	89.4	High	High	High	High	High	High	High	High	High
FALSE	High	Master Protein	Q96AY3	Peptidyl-prolyl cis-trans isomerase FKBP10 OS=Homo sapiens OX=9606 GN=FKBP10 PE=1 SV=1	0	196.746	48	25	94	24	1	582	64.2	5.62	276.91	25	1	101.7	96.6	101	93.6	101.9	109	Not Found	High	High	High	High	High	High	High	Not Found
FALSE	High	Master Protein	Q13509	Tubulin beta-3 chain OS=Homo sapiens OX=9606 GN=TUBB3 PE=1 SV=2	0	195.774	57	19	140	5	1	450	50.4	4.93	459.03	19	4	92.1	100.7	95.9	102	96.2	102.6	Not Found	Not Found	Not Found	High	High	High	High	High	Not Found
FALSE	High	Master Protein	Q13200	26S proteasome non-ATPase regulatory subunit 2 OS=Homo sapiens OX=9606 GN=PSMD2 PE=1 SV=3	0	195.073	44	29	52	29	1	908	100.1	5.2	200.19	29	0	97.2	103.3	101	104.8	98.8	87.2	Not Found	High	High	High	High	High	High	High	Not Found
FALSE	High	Master Protein	Q9Y678	Coatomer subunit gamma-1 OS=Homo sapiens OX=9606 GN=COPG1 PE=1 SV=1	0	193.883	47	32	57	29	1	874	97.7	5.47	192.7	32	4	93	97.3	95.6	102.2	98.7	101.4	High	High	High	High	High	High	High	High	High
FALSE	High	Master Protein	P68366	Tubulin alpha-4A chain OS=Homo sapiens OX=9606 GN=TUBA4A PE=1 SV=1	0	193.815	56	19	148	4	1	448	49.9	5.06	458.3	19	0	87.5	96.3	90.8	100.6	100.4	105.7	High	High	High	High	Not Found	High	High	High	Not Found
FALSE	High	Master Protein	P40939	Trifunctional enzyme subunit alpha, mitochondrial OS=Homo sapiens OX=9606 GN=HADHA PE=1 SV=2	0	193.768	51	31	54	31	1	763	82.9	9.04	192.19	31	0	107.6	93.8	98.5	97.9	111.8	101.9	High	Not Found	High	High	High	High	High	High	Not Found
FALSE	High	Master Protein	P08123	Collagen alpha-2(I) chain OS=Homo sapiens OX=9606 GN=COL1A2 PE=1 SV=7	0	192.821	35	35	74	34	1	1366	129.2	8.95	244.25	35	1	121.6	112.7	121.3	83	91.5	105.6	High	High	High	High	High	High	High	High	Not Found
FALSE	High	Master Protein	Q08211	ATP-dependent RNA helicase A OS=Homo sapiens OX=9606 GN=DHX9 PE=1 SV=4	0	192.66	29	30	42	30	1	1270	140.9	6.84	151.51	30	0	99.5	97.3	100.3	95.2	103.8	106.7	Not Found	High	High	High	High	High	High	High	Not Found
FALSE	High	Master Protein	O43852	Calumenin OS=Homo sapiens OX=9606 GN=CALU PE=1 SV=2	0	192.342	70	20	67	20	1	315	37.1	4.64	274.44	20	0	108.6	109.5	107.4	99	98.8	82.9	Not Found	High	High	High	High	High	Not Found	Not Found	Not Found
FALSE	High	Master Protein	P00338	L-lactate dehydrogenase A chain OS=Homo sapiens OX=9606 GN=LDHA PE=1 SV=2	0	190.712	63	20	155	18	1	332	36.7	8.27	539.75	20	2	90.4	98.7	91.7	107.2	99.9	99.3	High	High	High	High	High	High	High	High	High
FALSE	High	Master Protein	P50454	Serpin H1 OS=Homo sapiens OX=9606 GN=SERPINH1 PE=1 SV=2	0	190.134	56	22	64	22	1	418	46.4	8.69	251.16	22	0	101.6	99.2	102.5	96.3	102	105.5	Not Found	Not Found	High	High	High	High	High	High	High
FALSE	High	Master Protein	P68032	Actin, alpha cardiac muscle 1 OS=Homo sapiens OX=9606 GN=ACTC1 PE=1 SV=1	0	189.949	56	18	505	7	1	377	42	5.39	1439.36	18	0	101	99.3	100.4	102.4	103.2	90.4	High	High	Not Found	High	High	High	High	High	Not Found
FALSE	High	Master Protein	Q99832	T-complex protein 1 subunit eta OS=Homo sapiens OX=9606 GN=CCT7 PE=1 SV=2	0	189.844	62	27	73	27	1	543	59.3	7.65	244.44	27	0	95.9	104.6	97.7	103.8	96.3	90.8	High	High	High	High	High	High	High	High	Not Found
FALSE	High	Master Protein	Q9BUF5	Tubulin beta-6 chain OS=Homo sapiens OX=9606 GN=TUBB6 PE=1 SV=1	0	189.786	57	19	111	9	1	446	49.8	4.88	322.24	19	0	89.3	97.3	94.2	103.4	100.4	105.3	Not Found	Not Found	High	High	High	High	High	High	Not Found
FALSE	High	Master Protein	P63010	AP-2 complex subunit beta OS=Homo sapiens OX=9606 GN=AP2B1 PE=1 SV=1	0	189.287	39	32	56	17	1	937	104.5	5.38	203.11	32	15	104.3	101.7	107.4	101.7	100.8	93.5	Not Found	Not Found	Not Found	High	High	High	High	High	Not Found
FALSE	High	Master Protein	Q05682	Caldesmon OS=Homo sapiens OX=9606 GN=CALD1 PE=1 SV=3	0	187.418	29	23	68	23	1	793	93.2	5.66	240.33	23	0	102.9	102.9	105.3	106.7	98.3	87.3	High	High	High	High	High	High	High	High	High
FALSE	High	Master Protein	P35606	Coatomer subunit beta' OS=Homo sapiens OX=9606 GN=COPB2 PE=1 SV=2	0	186.563	41	31	58	31	1	906	102.4	5.27	204.8	31	0	93.6	98	95.4	103.9	99	99.1	Not Found	High	High	High	High	High	High	High	Not Found
FALSE	High	Master Protein	P48643	T-complex protein 1 subunit epsilon OS=Homo sapiens OX=9606 GN=CCT5 PE=1 SV=1	0	185.573	56	28	84	27	1	541	59.6	5.66	265.54	28	0	97.4	103.3	98.4	105.5	96.7	91.2	Not Found	High	Not Found	High	High	High	High	High	Not Found
FALSE	High	Master Protein	Q01813	ATP-dependent 6-phosphofructokinase, platelet type OS=Homo sapiens OX=9606 GN=PFKP PE=1 SV=2	0	185.149	38	27	52	23	1	784	85.5	7.55	185.18	27	5	90.8	97.2	92.3	104.6	99.8	104.1	Not Found	High	High	High	High	High	High	High	Not Found
FALSE	High	Master Protein	P98160	Basement membrane-specific heparan sulfate proteoglycan core protein OS=Homo sapiens OX=9606 GN=HSPG2 PE=1 SV=4	0	183.141	12	35	41	35	1	4391	468.5	6.51	141.89	35	0	99.5	98.2	96.8	96.1	106.2	131.6	High	High	High	High	High	High	High	High	Not Found
FALSE	High	Master Protein	Q01518	Adenylyl cyclase-associated protein 1 OS=Homo sapiens OX=9606 GN=CAP1 PE=1 SV=5	0	182.597	60	26	111	26	1	475	51.9	8.06	349.31	26	0	92	101.3	96.7	107.6	96.6	92.6	Not Found	High	High	High	High	High	High	High	Not Found
FALSE	High	Master Protein	P53618	Coatomer subunit beta OS=Homo sapiens OX=9606 GN=COPB1 PE=1 SV=3	0	181.57	40	30	46	30	1	953	107.1	6.05	152.71	30	0	92.6	98.9	95.6	104	97.1	102.2	High	High	High	High	High	High	High	High	Not Found
FALSE	High	Master Protein	P53621	Coatomer subunit alpha OS=Homo sapiens OX=9606 GN=COPA PE=1 SV=2	0	179.492	33	35	47	35	1	1224	138.3	7.66	157.63	35	0	93.8	101.5	95.5	104.6	98.9	96	High	High	High	High	High	High	High	High	Not Found
FALSE	High	Master Protein	P42704	Leucine-rich PPR motif-containing protein, mitochondrial OS=Homo sapiens OX=9606 GN=LRPPRC PE=1 SV=3	0	177.843	31	37	46	37	1	1394	157.8	6.13	160.73	37	0	113	92.7	97	91.9	110.4	107.1	Not Found	High	High	High	High	High	High	High	Not Found
FALSE	High	Master Protein	P21796	Voltage-dependent anion-selective channel protein 1 OS=Homo sapiens OX=9606 GN=VDAC1 PE=1 SV=2	0	175.773	71	16	69	15	1	283	30.8	8.54	272.25	16	1	104.9	98.7	106.5	97.1	105	96.5	Not Found	Not Found	High	High	High	High	High	High	High
FALSE	High	Master Protein	P25705	ATP synthase subunit alpha, mitochondrial OS=Homo sapiens OX=9606 GN=ATP5F1A PE=1 SV=1	0	174.276	57	26	90	26	1	553	59.7	9.13	286.98	26	0	108.8	97.3	102.5	99.1	106.8	94.1	Not Found	High	High	High	High	High	High	High	High
FALSE	High	Master Protein	P40926	Malate dehydrogenase, mitochondrial OS=Homo sapiens OX=9606 GN=MDH2 PE=1 SV=3	0	174.138	68	20	78	20	1	338	35.5	8.68	279.31	20	0	105.5	101.1	108.6	97.4	103.6	93.1	Not Found	Not Found	High	High	High	High	High	High	High
FALSE	High	Master Protein	O95782	AP-2 complex subunit alpha-1 OS=Homo sapiens OX=9606 GN=AP2A1 PE=1 SV=3	0	173.507	36	32	53	20	1	977	107.5	7.03	159.12	32	11	98.1	97.3	99.7	98.4	102.4	107.7	Not Found	Not Found	High	High	High	High	High	High	Not Found
FALSE	High	Master Protein	P60174	Triosephosphate isomerase OS=Homo sapiens OX=9606 GN=TPI1 PE=1 SV=4	0	173.004	84	16	69	16	1	249	26.7	6.9	268.95	16	0	91.2	97.6	96.5	107.3	101.1	96.5	Not Found	Not Found	High	High	High	High	High	High	High
FALSE	High	Master Protein	P29401	Transketolase OS=Homo sapiens OX=9606 GN=TKT PE=1 SV=3	0	172.884	47	25	69	25	1	623	67.8	7.66	237.52	25	0	94.5	99.9	98.6	105.5	100.2	91.1	Not Found	Not Found	Not Found	High	High	High	High	High	Not Found
FALSE	High	Master Protein	Q99460	26S proteasome non-ATPase regulatory subunit 1 OS=Homo sapiens OX=9606 GN=PSMD1 PE=1 SV=2	0	172.768	39	30	43	30	1	953	105.8	5.39	156.03	30	0	98.5	104.3	100.1	106.9	98.4	85.4	Not Found	High	High	High	High	High	High	High	Not Found
FALSE	High	Master Protein	P51659	Peroxisomal multifunctional enzyme type 2 OS=Homo sapiens OX=9606 GN=HSD17B4 PE=1 SV=3	0	172.441	44	26	40	26	1	736	79.6	8.84	146.84	26	0	98.2	95	99.1	97.8	105.8	114.3	Not Found	High	Not Found	High	High	High	High	High	Not Found
FALSE	High	Master Protein	P05556	Integrin beta-1 OS=Homo sapiens OX=9606 GN=ITGB1 PE=1 SV=2	0	171.402	35	25	91	25	1	798	88.4	5.39	319.29	25	0	111.3	105.4	105.4	105.7	104.1	91.8	High	High	High	High	High	High	High	High	High
FALSE	High	Master Protein	P04083	Annexin A1 OS=Homo sapiens OX=9606 GN=ANXA1 PE=1 SV=2	0	170.474	68	21	94	21	1	346	38.7	7.02	313.37	21	0	94.1	104.1	94.6	112.3	93.8	92.7	High	High	High	High	High	High	High	High	Not Found
FALSE	High	Master Protein	P08727	Keratin, type I cytoskeletal 19 OS=Homo sapiens OX=9606 GN=KRT19 PE=1 SV=4	0	169.152	73	25	62	17	1	400	44.1	5.14	191.39	25	9	99.3	93.6	96.8	98.8	112	106.2	High	High	High	High	High	High	High	High	Not Found
FALSE	High	Master Protein	Q9UHB6	LIM domain and actin-binding protein 1 OS=Homo sapiens OX=9606 GN=LIMA1 PE=1 SV=1	0	169.081	43	26	66	26	1	759	85.2	6.84	238.2	26	0	104.3	101.7	103.2	99.6	97.3	92.9	High	High	High	High	High	High	High	High	High
FALSE	High	Master Protein	Q9P0K7	Ankycorbin OS=Homo sapiens OX=9606 GN=RAI14 PE=1 SV=2	0	168.946	40	36	46	36	1	980	110	6.21	154.85	36	0	100.6	98.6	100.4	99	102.4	95.1	High	High	High	High	High	High	High	High	High
FALSE	High	Master Protein	P02452	Collagen alpha-1(I) chain OS=Homo sapiens OX=9606 GN=COL1A1 PE=1 SV=5	0	168.391	25	29	49	28	1	1464	138.9	5.8	162.43	29	1	145.6	128.8	144.4	66.6	78.1	87.5	High	High	High	High	High	High	High	High	Not Found
FALSE	High	Master Protein	P49368	T-complex protein 1 subunit gamma OS=Homo sapiens OX=9606 GN=CCT3 PE=1 SV=4	0	168.258	60	29	57	29	1	545	60.5	6.49	189.96	29	0	96.1	101.1	97.3	101.2	95.5	102.4	High	High	High	High	High	High	High	High	High
FALSE	High	Master Protein	Q04637	Eukaryotic translation initiation factor 4 gamma 1 OS=Homo sapiens OX=9606 GN=EIF4G1 PE=1 SV=4	0	167.077	23	35	58	32	1	1599	175.4	5.33	180.65	35	3	97.1	101.9	99.1	99.1	95.4	100.7	High	High	High	High	High	High	High	High	High
FALSE	High	Master Protein	Q15436	Protein transport protein Sec23A OS=Homo sapiens OX=9606 GN=SEC23A PE=1 SV=2	0	165.844	39	23	47	20	1	765	86.1	7.08	155.01	23	3	95.6	98.9	97.4	102.2	100.2	102.4	High	High	High	High	High	High	High	High	Not Found
FALSE	High	Master Protein	O94979	Protein transport protein Sec31A OS=Homo sapiens OX=9606 GN=SEC31A PE=1 SV=3	0	165.698	25	25	41	25	1	1220	132.9	6.89	153.94	25	0	92.4	98.8	96.7	102.9	97.6	97.9	Not Found	High	High	High	High	High	High	High	Not Found
FALSE	High	Master Protein	P08758	Annexin A5 OS=Homo sapiens OX=9606 GN=ANXA5 PE=1 SV=2	0	164.444	73	21	106	20	1	320	35.9	5.05	367.26	21	1	96.5	105.9	95.4	107.1	93.5	89.6	High	High	High	High	High	High	High	High	High
FALSE	High	Master Protein	P17987	T-complex protein 1 subunit alpha OS=Homo sapiens OX=9606 GN=TCP1 PE=1 SV=1	0	163.656	55	25	62	25	1	556	60.3	6.11	191.43	25	0	96.3	102	98	103.9	98.1	92	High	High	High	High	High	High	High	High	Not Found
FALSE	High	Master Protein	Q02809	Procollagen-lysine,2-oxoglutarate 5-dioxygenase 1 OS=Homo sapiens OX=9606 GN=PLOD1 PE=1 SV=2	0	163.548	49	30	72	29	1	727	83.5	6.95	224.94	30	1	103.2	97.8	102.8	96.1	105.2	103.3	Not Found	High	High	High	High	High	High	High	High
FALSE	High	Master Protein	Q9UPN3	Microtubule-actin cross-linking factor 1, isoforms 1/2/3/5 OS=Homo sapiens OX=9606 GN=MACF1 PE=1 SV=4	0	163.538	6	34	38	32	1	7388	837.8	5.39	128.56	34	1	101.1	103.5	99.8	102.5	99.2	99.2	High	High	High	High	High	High	High	High	High
FALSE	High	Master Protein	Q14152	Eukaryotic translation initiation factor 3 subunit A OS=Homo sapiens OX=9606 GN=EIF3A PE=1 SV=1	0	163.098	30	37	59	37	1	1382	166.5	6.79	182.27	37	0	96.6	95.9	96.2	98.3	100	110.1	High	High	High	High	High	High	High	High	High
FALSE	High	Master Protein	P00367	Glutamate dehydrogenase 1, mitochondrial OS=Homo sapiens OX=9606 GN=GLUD1 PE=1 SV=2	0	163.055	45	22	47	22	1	558	61.4	7.8	163.68	22	0	112.2	99.2	101.9	98.8	107.2	89.3	Not Found	High	High	High	High	High	High	High	High
FALSE	High	Master Protein	P33176	Kinesin-1 heavy chain OS=Homo sapiens OX=9606 GN=KIF5B PE=1 SV=1	0	162.66	34	27	44	27	1	963	109.6	6.51	163.94	27	0	95.3	105.5	95.4	105.5	93.5	95.3	High	High	High	High	High	High	Not Found	Not Found	High
FALSE	High	Master Protein	Q92945	Far upstream element-binding protein 2 OS=Homo sapiens OX=9606 GN=KHSRP PE=1 SV=4	0	162.558	43	21	45	18	1	711	73.1	7.3	175.91	21	2	99.1	96	100.5	94.8	101.3	108.5	High	High	High	High	High	High	High	Not Found	Not Found
FALSE	High	Master Protein	P26641	Elongation factor 1-gamma OS=Homo sapiens OX=9606 GN=EEF1G PE=1 SV=3	0	161.746	55	23	86	23	1	437	50.1	6.67	275.07	23	0	98.7	101.9	100.1	100	98.4	95.7	Not Found	High	High	High	High	High	High	High	High
FALSE	High	Master Protein	Q16643	Drebrin OS=Homo sapiens OX=9606 GN=DBN1 PE=1 SV=4	0	161.503	43	21	43	21	1	649	71.4	4.45	180.63	21	0	101.8	99.1	104.2	96.5	100	101.4	High	High	High	High	High	High	High	High	High
FALSE	High	Master Protein	P49748	Very long-chain specific acyl-CoA dehydrogenase, mitochondrial OS=Homo sapiens OX=9606 GN=ACADVL PE=1 SV=1	0	160.187	51	27	41	27	1	655	70.3	8.75	140.2	27	0	103.8	94.3	100.4	95.3	111	110.2	Not Found	High	High	High	High	High	High	High	Not Found
FALSE	High	Master Protein	Q9Y4L1	Hypoxia up-regulated protein 1 OS=Homo sapiens OX=9606 GN=HYOU1 PE=1 SV=1	0	159.937	33	27	46	27	1	999	111.3	5.22	168.08	27	0	104.6	97.4	101.4	94.9	104.4	100.6	High	High	High	High	High	High	High	High	Not Found
FALSE	High	Master Protein	P50395	Rab GDP dissociation inhibitor beta OS=Homo sapiens OX=9606 GN=GDI2 PE=1 SV=2	0	159.824	59	22	57	15	1	445	50.6	6.47	205.09	22	9	93.4	99.7	95.6	104.4	97.6	93.5	High	High	High	High	High	High	High	High	Not Found
FALSE	High	Master Protein	P19338	Nucleolin OS=Homo sapiens OX=9606 GN=NCL PE=1 SV=3	0	159.059	39	36	94	36	1	710	76.6	4.7	277.33	36	0	106.3	99.7	105.9	98.6	95.5	95.7	High	High	High	High	High	High	High	High	High
FALSE	High	Master Protein	P35221	Catenin alpha-1 OS=Homo sapiens OX=9606 GN=CTNNA1 PE=1 SV=1	0	157.746	39	28	34	23	1	906	100	6.29	117.38	28	4	101	100.3	98.8	99.9	102.8	97.8	Not Found	Not Found	High	High	High	High	High	High	Not Found
FALSE	High	Master Protein	P36578	60S ribosomal protein L4 OS=Homo sapiens OX=9606 GN=RPL4 PE=1 SV=5	0	157.744	47	20	73	20	1	427	47.7	11.06	269.49	20	0	101	97.4	103.8	97.5	96.8	104.1	Not Found	Not Found	High	High	High	High	High	High	High
FALSE	High	Master Protein	P52272	Heterogeneous nuclear ribonucleoprotein M OS=Homo sapiens OX=9606 GN=HNRNPM PE=1 SV=3	0	157.379	41	27	66	27	1	730	77.5	8.7	210.9	27	0	103.2	100.1	102.3	97.3	99.4	98.2	High	High	High	High	High	High	High	High	Not Found
FALSE	High	Master Protein	P15311	Ezrin OS=Homo sapiens OX=9606 GN=EZR PE=1 SV=4	0	157.368	53	34	70	21	1	586	69.4	6.27	221.87	34	2	94.9	99.7	94.9	103.9	96.9	99	High	High	High	High	High	High	High	High	Not Found
FALSE	High	Master Protein	P07942	Laminin subunit beta-1 OS=Homo sapiens OX=9606 GN=LAMB1 PE=1 SV=2	0	157.281	19	26	40	26	1	1786	197.9	4.94	139.8	26	0	95.1	96.4	98.4	95.6	100.1	113.9	High	High	High	High	High	High	High	High	High
FALSE	High	Master Protein	Q9UGT4	Sushi domain-containing protein 2 OS=Homo sapiens OX=9606 GN=SUSD2 PE=1 SV=1	0	156.992	37	18	47	18	1	822	90.2	6.28	178.27	18	0	100.6	96.3	95.6	95.4	103.8	115.5	Not Found	High	High	High	High	High	High	High	Not Found
FALSE	High	Master Protein	P04264	Keratin, type II cytoskeletal 1 OS=Homo sapiens OX=9606 GN=KRT1 PE=1 SV=6	0	156.516	38	24	67	19	1	644	66	8.12	217.33	24	3	101.3	105.1	105.4	127.6	145.3	66.8	High	High	High	High	High	High	High	High	Not Found
FALSE	High	Master Protein	Q6WCQ1	Myosin phosphatase Rho-interacting protein OS=Homo sapiens OX=9606 GN=MPRIP PE=1 SV=3	0	153.988	35	25	34	25	1	1025	116.5	6.21	132.06	25	0	99	92.9	95.6	94.9	105.7	118.6	High	High	High	High	High	High	High	Not Found	Not Found
FALSE	High	Master Protein	P39023	60S ribosomal protein L3 OS=Homo sapiens OX=9606 GN=RPL3 PE=1 SV=2	0	153.75	58	24	102	24	1	403	46.1	10.18	280.02	24	0	101.8	100.6	103.1	98.9	99.3	92.2	Not Found	High	High	High	High	High	High	High	Not Found
FALSE	High	Master Protein	O60664	Perilipin-3 OS=Homo sapiens OX=9606 GN=PLIN3 PE=1 SV=3	0	153.725	62	19	35	19	1	434	47	5.44	138.8	19	0	94.9	101.9	93.8	106.7	93.2	95.4	Not Found	High	High	High	High	High	High	High	Not Found
FALSE	High	Master Protein	P37802	Transgelin-2 OS=Homo sapiens OX=9606 GN=TAGLN2 PE=1 SV=3	0	153.535	79	16	119	16	1	199	22.4	8.25	353.8	16	0	90.4	101.8	94.6	109.5	97	96.7	Not Found	High	High	High	High	High	High	High	Not Found
FALSE	High	Master Protein	Q00839	Heterogeneous nuclear ribonucleoprotein U OS=Homo sapiens OX=9606 GN=HNRNPU PE=1 SV=6	0	153.281	30	25	57	25	1	825	90.5	6	186.56	25	0	102.9	98.6	105	96.9	100.8	95.8	High	High	High	High	High	High	High	High	Not Found
FALSE	High	Master Protein	Q15084	Protein disulfide-isomerase A6 OS=Homo sapiens OX=9606 GN=PDIA6 PE=1 SV=1	0	152.258	50	17	44	17	1	440	48.1	5.08	171.17	17	0	104	104.2	101.4	98.7	101.7	93.8	High	High	High	High	High	High	High	High	Not Found
FALSE	High	Master Protein	P22626	Heterogeneous nuclear ribonucleoproteins A2/B1 OS=Homo sapiens OX=9606 GN=HNRNPA2B1 PE=1 SV=2	0	152.028	63	20	110	16	1	353	37.4	8.95	374.32	20	4	107	99.8	108.2	95.5	98.8	101	High	High	High	High	High	High	High	High	High
FALSE	High	Master Protein	Q08378	Golgin subfamily A member 3 OS=Homo sapiens OX=9606 GN=GOLGA3 PE=1 SV=2	0	151.835	21	25	31	25	1	1498	167.3	5.44	117.45	25	0	96.4	97.7	99	98.6	99.5	109.9	High	High	High	High	High	High	High	High	Not Found
FALSE	High	Master Protein	Q9P2J5	Leucine--tRNA ligase, cytoplasmic OS=Homo sapiens OX=9606 GN=LARS1 PE=1 SV=2	0	151.774	35	34	46	34	1	1176	134.4	7.3	148.12	34	0	97.1	99.3	97.7	104.1	101.5	97	High	High	High	High	High	High	High	High	High
FALSE	High	Master Protein	P78527	DNA-dependent protein kinase catalytic subunit OS=Homo sapiens OX=9606 GN=PRKDC PE=1 SV=3	0	151.698	10	39	50	39	1	4128	468.8	7.12	149.92	39	0	100.2	100.5	103.5	101.2	104.7	103.7	Not Found	High	High	High	High	High	High	High	High
FALSE	High	Master Protein	P13489	Ribonuclease inhibitor OS=Homo sapiens OX=9606 GN=RNH1 PE=1 SV=2	0	151.404	63	21	47	21	1	461	49.9	4.82	176.97	21	0	89.1	94.7	93.7	101.1	99.2	115.1	High	High	High	High	High	High	High	High	Not Found
FALSE	High	Master Protein	Q13451	Peptidyl-prolyl cis-trans isomerase FKBP5 OS=Homo sapiens OX=9606 GN=FKBP5 PE=1 SV=2	0	150.971	53	23	48	23	1	457	51.2	5.9	152.81	23	0	100.8	105.7	103.3	98.2	96.1	89.8	High	High	High	High	High	High	High	High	Not Found
FALSE	High	Master Protein	P31948	Stress-induced-phosphoprotein 1 OS=Homo sapiens OX=9606 GN=STIP1 PE=1 SV=1	0	149.874	55	34	58	34	1	543	62.6	6.8	167.54	34	0	96.4	100.1	97.5	99.2	96.1	101	Not Found	High	High	High	High	High	High	High	Not Found
FALSE	High	Master Protein	P61978	Heterogeneous nuclear ribonucleoprotein K OS=Homo sapiens OX=9606 GN=HNRNPK PE=1 SV=1	0	148.815	45	18	90	18	1	463	50.9	5.54	268.49	18	0	98.8	97	98.9	97.2	100.6	110.2	High	High	High	High	High	High	High	High	High
FALSE	High	Master Protein	Q8IVF2	Protein AHNAK2 OS=Homo sapiens OX=9606 GN=AHNAK2 PE=1 SV=2	0	148.795	21	36	46	34	1	5795	616.2	5.36	138.29	36	0	104.7	99.4	100.4	98	102	100.3	High	High	High	High	High	High	High	High	High
FALSE	High	Master Protein	P05783	Keratin, type I cytoskeletal 18 OS=Homo sapiens OX=9606 GN=KRT18 PE=1 SV=2	0	147.983	63	24	58	22	1	430	48	5.45	183.78	24	0	101.4	93.6	96.6	94	104.6	115.6	High	High	High	High	High	High	High	Not Found	Not Found
FALSE	High	Master Protein	Q8WX93	Palladin OS=Homo sapiens OX=9606 GN=PALLD PE=1 SV=3	0	147.046	28	30	55	30	1	1383	150.5	7.09	182.7	30	0	100.2	98.7	95.7	98.5	99.7	109.3	High	High	High	High	High	High	High	High	Not Found
FALSE	High	Master Protein	P13674	Prolyl 4-hydroxylase subunit alpha-1 OS=Homo sapiens OX=9606 GN=P4HA1 PE=1 SV=2	0	146.337	50	25	62	25	1	534	61	6.01	224.63	25	0	102.9	98.6	104.3	97.6	105	92.7	Not Found	High	High	High	High	High	High	High	Not Found
FALSE	High	Master Protein	Q14203	Dynactin subunit 1 OS=Homo sapiens OX=9606 GN=DCTN1 PE=1 SV=3	0	146.309	29	27	40	27	1	1278	141.6	5.81	137.69	27	0	93.8	103	95.4	105.8	96.5	100.3	High	High	High	High	High	High	High	High	Not Found
FALSE	High	Master Protein	P07339	Cathepsin D OS=Homo sapiens OX=9606 GN=CTSD PE=1 SV=1	0	145.981	43	13	68	13	1	412	44.5	6.54	237.84	13	0	103.8	97.8	103.7	94.2	107.6	98.9	Not Found	High	High	High	High	High	High	High	Not Found
FALSE	High	Master Protein	P43243	Matrin-3 OS=Homo sapiens OX=9606 GN=MATR3 PE=1 SV=2	0	143.74	36	25	42	25	1	847	94.6	6.25	142.25	25	0	99.7	95.2	100.2	94.5	101.1	105.6	High	High	High	High	High	High	High	High	High
FALSE	High	Master Protein	P05455	Lupus La protein OS=Homo sapiens OX=9606 GN=SSB PE=1 SV=2	0	142.788	51	23	49	23	1	408	46.8	7.12	173.74	23	0	103.3	101.9	106.5	96.2	98.4	90.3	Not Found	High	High	High	High	High	High	High	Not Found
FALSE	High	Master Protein	Q8NBS9	Thioredoxin domain-containing protein 5 OS=Homo sapiens OX=9606 GN=TXNDC5 PE=1 SV=2	0	142.564	48	20	62	20	1	432	47.6	5.97	205.81	20	0	99.7	95.4	100.4	97.2	103.4	104.7	High	High	High	High	High	High	High	High	Not Found
FALSE	High	Master Protein	P11047	Laminin subunit gamma-1 OS=Homo sapiens OX=9606 GN=LAMC1 PE=1 SV=3	0	142.487	21	25	29	25	1	1609	177.5	5.12	96.29	25	0	101.9	103.6	99.4	97.7	102.5	98.6	Not Found	High	High	High	High	High	High	High	Not Found
FALSE	High	Master Protein	Q9UHD8	Septin-9 OS=Homo sapiens OX=9606 GN=SEPTIN9 PE=1 SV=2	0	142.348	49	26	58	26	1	586	65.4	8.97	187.93	26	0	95.9	94.7	95	102	100.3	111	High	High	High	High	High	High	High	High	Not Found
FALSE	High	Master Protein	Q9NYU2	UDP-glucose:glycoprotein glucosyltransferase 1 OS=Homo sapiens OX=9606 GN=UGGT1 PE=1 SV=3	0	141.654	20	29	50	28	1	1555	177.1	5.63	158.95	29	1	102.8	97	100.3	96.8	104.6	102.8	Not Found	High	High	High	High	High	High	High	Not Found
FALSE	High	Master Protein	Q14974	Importin subunit beta-1 OS=Homo sapiens OX=9606 GN=KPNB1 PE=1 SV=2	0	141.122	34	25	47	25	1	876	97.1	4.78	154.09	25	0	98.1	102.8	98.7	101.2	96.2	99	High	High	High	High	High	High	High	High	Not Found
FALSE	High	Master Protein	Q16658	Fascin OS=Homo sapiens OX=9606 GN=FSCN1 PE=1 SV=3	0	140.763	51	23	49	23	1	493	54.5	7.24	166.46	23	0	94	98.5	99.5	107.6	98.7	102.1	Not Found	High	High	High	High	High	High	High	Not Found
FALSE	High	Master Protein	Q03252	Lamin-B2 OS=Homo sapiens OX=9606 GN=LMNB2 PE=1 SV=4	0	140.48	41	27	61	24	1	620	69.9	5.59	186.31	27	1	102.1	93.4	101.3	90.1	103.1	122.2	High	High	High	High	High	High	High	High	Not Found
FALSE	High	Master Protein	P18669	Phosphoglycerate mutase 1 OS=Homo sapiens OX=9606 GN=PGAM1 PE=1 SV=2	0	139.736	70	13	40	13	1	254	28.8	7.18	143.86	13	0	91.1	101.1	96.1	107.1	99	91.6	Not Found	Not Found	High	High	High	High	High	High	Not Found
FALSE	High	Master Protein	O60506	Heterogeneous nuclear ribonucleoprotein Q OS=Homo sapiens OX=9606 GN=SYNCRIP PE=1 SV=2	0	139.486	47	23	39	16	1	623	69.6	8.59	136.15	23	8	102.2	100	106.9	99.7	96	91.5	Not Found	Not Found	High	High	High	High	Not Found	High	Not Found
FALSE	High	Master Protein	P09651	Heterogeneous nuclear ribonucleoprotein A1 OS=Homo sapiens OX=9606 GN=HNRNPA1 PE=1 SV=5	0	139.198	48	18	66	12	1	372	38.7	9.13	242.29	18	2	103	93	107	91	94.3	111.3	Not Found	High	High	High	High	High	High	High	High
FALSE	High	Master Protein	P61247	40S ribosomal protein S3a OS=Homo sapiens OX=9606 GN=RPS3A PE=1 SV=2	0	138.897	68	21	75	21	1	264	29.9	9.73	238.86	21	0	102.2	100.2	102.6	98.1	98.3	96.8	High	High	High	High	High	High	High	High	Not Found
FALSE	High	Master Protein	P49411	Elongation factor Tu, mitochondrial OS=Homo sapiens OX=9606 GN=TUFM PE=1 SV=2	0	138.803	55	21	44	21	1	452	49.5	7.61	160.66	21	0	108.8	97.5	101.3	96.6	108.5	100.6	High	High	High	High	High	High	High	High	Not Found
FALSE	High	Master Protein	P21397	Amine oxidase [flavin-containing] A OS=Homo sapiens OX=9606 GN=MAOA PE=1 SV=1	0	138.753	48	22	54	22	1	527	59.6	7.85	179.67	22	0	112.1	103	105.6	93.3	101.5	95.8	Not Found	High	High	High	High	High	High	High	Not Found
FALSE	High	Master Protein	P63244	Receptor of activated protein C kinase 1 OS=Homo sapiens OX=9606 GN=RACK1 PE=1 SV=3	0	138.392	79	19	57	19	1	317	35.1	7.69	225.68	19	0	103.4	100.3	103.8	98.5	100.2	86.2	Not Found	High	High	High	High	High	High	High	Not Found
FALSE	High	Master Protein	Q9UQ80	Proliferation-associated protein 2G4 OS=Homo sapiens OX=9606 GN=PA2G4 PE=1 SV=3	0	137.714	59	20	49	20	1	394	43.8	6.55	164.33	20	0	98.6	101.5	101	101.3	97	92.5	High	High	High	High	High	High	High	High	Not Found
FALSE	High	Master Protein	P06744	Glucose-6-phosphate isomerase OS=Homo sapiens OX=9606 GN=GPI PE=1 SV=4	0	137.599	42	19	41	19	1	558	63.1	8.32	152.3	19	0	91.4	98.9	95.5	106	99.4	96.2	High	Not Found	High	High	High	High	High	High	Not Found
FALSE	High	Master Protein	O00159	Unconventional myosin-Ic OS=Homo sapiens OX=9606 GN=MYO1C PE=1 SV=4	0	137.092	33	27	35	27	1	1063	121.6	9.41	122.04	27	0	103.3	100.8	99.6	100.2	101.9	105.5	Not Found	High	High	High	High	High	High	High	Not Found
FALSE	High	Master Protein	P26640	Valine--tRNA ligase OS=Homo sapiens OX=9606 GN=VARS1 PE=1 SV=4	0	135.692	24	25	33	25	1	1264	140.4	7.59	120.99	25	0	98.3	99.2	98	99.3	103	104.2	Not Found	High	High	High	High	High	High	High	Not Found
FALSE	High	Master Protein	P14866	Heterogeneous nuclear ribonucleoprotein L OS=Homo sapiens OX=9606 GN=HNRNPL PE=1 SV=2	0	135.094	38	18	57	17	1	589	64.1	8.22	189.76	18	1	102.9	99.1	104.7	96.1	101.9	94.8	Not Found	High	High	High	High	High	High	High	Not Found
FALSE	High	Master Protein	O00571	ATP-dependent RNA helicase DDX3X OS=Homo sapiens OX=9606 GN=DDX3X PE=1 SV=3	0	134.258	48	27	40	26	1	662	73.2	7.18	132.2	27	1	96.4	99.9	99	101.8	96.7	93.6	Not Found	High	High	High	High	High	High	High	Not Found
FALSE	High	Master Protein	P11940	Polyadenylate-binding protein 1 OS=Homo sapiens OX=9606 GN=PABPC1 PE=1 SV=2	0	133.565	42	25	37	18	1	636	70.6	9.5	123.65	25	7	99.8	97.9	104.7	96.6	96	94	High	Not Found	High	High	Not Found	High	High	High	High
FALSE	High	Master Protein	P13010	X-ray repair cross-complementing protein 5 OS=Homo sapiens OX=9606 GN=XRCC5 PE=1 SV=3	0	133.389	36	22	38	22	1	732	82.7	5.81	135.38	22	0	107.4	98.1	104.3	97.6	104.1	89	High	High	High	High	High	High	High	High	High
FALSE	High	Master Protein	P17980	26S proteasome regulatory subunit 6A OS=Homo sapiens OX=9606 GN=PSMC3 PE=1 SV=3	0	133.297	52	21	39	21	1	439	49.2	5.24	131.71	21	0	98.7	100.7	99.2	99.7	99.1	99.4	Not Found	High	High	High	High	High	High	High	Not Found
FALSE	High	Master Protein	Q15075	Early endosome antigen 1 OS=Homo sapiens OX=9606 GN=EEA1 PE=1 SV=2	0	132.787	22	28	31	28	1	1411	162.4	5.68	103.34	28	0	98.5	98.7	101	97.4	99.8	107.2	Not Found	High	High	High	High	High	High	High	Not Found
FALSE	High	Master Protein	O00429	Dynamin-1-like protein OS=Homo sapiens OX=9606 GN=DNM1L PE=1 SV=2	0	132.48	37	24	32	24	1	736	81.8	6.81	107.93	24	0	92.3	99.2	93	102	96.7	107.5	High	High	High	High	High	High	High	High	High
FALSE	High	Master Protein	P17301	Integrin alpha-2 OS=Homo sapiens OX=9606 GN=ITGA2 PE=1 SV=1	0	132.427	21	20	32	20	1	1181	129.2	5.31	114.25	20	0	104.5	99.3	100.7	100.1	104.7	105.7	High	Not Found	High	High	High	High	High	High	Not Found
FALSE	High	Master Protein	Q12906	Interleukin enhancer-binding factor 3 OS=Homo sapiens OX=9606 GN=ILF3 PE=1 SV=3	0	132.314	33	26	36	26	1	894	95.3	8.76	123.63	26	0	99.1	96	101.5	95.3	102.2	109	Not Found	High	High	High	High	High	High	High	Not Found
FALSE	High	Master Protein	P11413	Glucose-6-phosphate 1-dehydrogenase OS=Homo sapiens OX=9606 GN=G6PD PE=1 SV=4	0	131.785	54	25	63	25	1	515	59.2	6.84	198.54	25	0	94.3	99.6	95	101.2	95.6	104.5	High	High	High	High	High	High	High	High	High
FALSE	High	Master Protein	P0DMV9	Heat shock 70 kDa protein 1B OS=Homo sapiens OX=9606 GN=HSPA1B PE=1 SV=1	0	131.616	41	23	86	17	1	641	70	5.66	282.56	23	0	97.3	108.9	99.9	104.2	93.7	82.5	High	High	High	High	High	High	High	High	Not Found
FALSE	High	Master Protein	P54136	Arginine--tRNA ligase, cytoplasmic OS=Homo sapiens OX=9606 GN=RARS1 PE=1 SV=2	0	131.268	42	24	37	24	1	660	75.3	6.68	124.56	24	0	98.2	99.6	98.7	97.7	98.2	101.6	Not Found	High	High	High	High	High	High	High	Not Found
FALSE	High	Master Protein	P41250	Glycine--tRNA ligase OS=Homo sapiens OX=9606 GN=GARS1 PE=1 SV=3	0	130.706	43	25	41	25	1	739	83.1	7.03	128.97	25	0	95.3	101.5	97.2	104.6	97	96.5	High	High	High	High	High	High	High	High	High
FALSE	High	Master Protein	P30153	Serine/threonine-protein phosphatase 2A 65 kDa regulatory subunit A alpha isoform OS=Homo sapiens OX=9606 GN=PPP2R1A PE=1 SV=4	0	129.919	45	21	37	21	1	589	65.3	5.11	121.76	21	0	95.4	99.3	98.1	99.3	98.5	100.7	High	High	High	High	High	High	High	High	High
FALSE	High	Master Protein	Q13263	Transcription intermediary factor 1-beta OS=Homo sapiens OX=9606 GN=TRIM28 PE=1 SV=5	0	129.841	33	23	33	23	1	835	88.5	5.77	121.33	23	0	103.7	98	105.4	93.6	100.5	97.4	Not Found	High	High	High	High	High	High	High	Not Found
FALSE	High	Master Protein	P52907	F-actin-capping protein subunit alpha-1 OS=Homo sapiens OX=9606 GN=CAPZA1 PE=1 SV=3	0	129.428	65	12	31	10	1	286	32.9	5.69	130.31	12	2	96.4	97	98.3	98.1	98.6	109.2	High	High	High	High	High	High	Not Found	High	High
FALSE	High	Master Protein	Q86VP6	Cullin-associated NEDD8-dissociated protein 1 OS=Homo sapiens OX=9606 GN=CAND1 PE=1 SV=2	0	128.797	27	29	43	29	1	1230	136.3	5.78	132.03	29	0	95.6	101.2	97.8	103.9	99.3	94.1	High	High	High	Not Found	High	High	High	High	High
FALSE	High	Master Protein	P12956	X-ray repair cross-complementing protein 6 OS=Homo sapiens OX=9606 GN=XRCC6 PE=1 SV=2	0	128.649	41	23	38	23	1	609	69.8	6.64	125.4	23	0	104	101.8	105.7	98.1	100.1	88.8	High	High	High	High	High	High	High	High	Not Found
FALSE	High	Master Protein	Q8WUM4	Programmed cell death 6-interacting protein OS=Homo sapiens OX=9606 GN=PDCD6IP PE=1 SV=1	0	128.425	38	32	53	32	1	868	96	6.52	160.52	32	0	94.7	98.4	96.7	101.5	95.8	103.6	High	High	High	High	High	High	High	High	Not Found
FALSE	High	Master Protein	P20810	Calpastatin OS=Homo sapiens OX=9606 GN=CAST PE=1 SV=4	0	128.355	45	21	40	21	1	708	76.5	5.07	130.42	21	0	96.2	109.7	96.9	109.8	89.7	82	High	High	High	High	High	High	High	High	Not Found
FALSE	High	Master Protein	P63104	14-3-3 protein zeta/delta OS=Homo sapiens OX=9606 GN=YWHAZ PE=1 SV=1	0	128.299	69	16	100	11	1	245	27.7	4.79	298.84	16	4	94.2	102.3	98.8	104.3	97.4	92	High	High	High	High	High	High	High	Not Found	Not Found
FALSE	High	Master Protein	P55084	Trifunctional enzyme subunit beta, mitochondrial OS=Homo sapiens OX=9606 GN=HADHB PE=1 SV=3	0	127.871	48	20	44	20	1	474	51.3	9.41	133.01	20	0	103.8	93.7	98.3	96.9	103.1	113.2	High	High	Not Found	High	High	High	High	High	Not Found
FALSE	High	Master Protein	P31946	14-3-3 protein beta/alpha OS=Homo sapiens OX=9606 GN=YWHAB PE=1 SV=3	0	127.487	61	13	80	6	1	246	28.1	4.83	253.74	13	0	92.7	104.9	99.6	106.8	101.1	91	High	High	High	High	High	High	High	Not Found	Not Found
FALSE	High	Master Protein	P62258	14-3-3 protein epsilon OS=Homo sapiens OX=9606 GN=YWHAE PE=1 SV=1	0	127.437	72	18	56	15	1	255	29.2	4.74	193.55	18	4	101.8	116	101.8	109.1	94.2	87.5	High	High	High	High	High	High	High	Not Found	Not Found
FALSE	High	Master Protein	Q06210	Glutamine--fructose-6-phosphate aminotransferase [isomerizing] 1 OS=Homo sapiens OX=9606 GN=GFPT1 PE=1 SV=3	0	126.8	42	23	30	20	1	699	78.8	7.11	101.38	23	2	90	98.5	91.7	101.6	97.2	110.4	Not Found	High	High	High	High	High	High	High	Not Found
FALSE	High	Master Protein	Q14157	Ubiquitin-associated protein 2-like OS=Homo sapiens OX=9606 GN=UBAP2L PE=1 SV=2	0	126.64	31	20	31	20	1	1087	114.5	7.11	115.28	20	0	99.3	105.2	103.3	100.3	94.9	91.9	High	High	High	High	High	High	High	High	Not Found
FALSE	High	Master Protein	Q96HE7	ERO1-like protein alpha OS=Homo sapiens OX=9606 GN=ERO1A PE=1 SV=2	0	126.638	51	16	27	16	1	468	54.4	5.68	103.34	16	0	100.8	92.2	97.2	96.3	111.8	114.1	Not Found	High	High	High	High	High	High	High	Not Found
FALSE	High	Master Protein	P35908	Keratin, type II cytoskeletal 2 epidermal OS=Homo sapiens OX=9606 GN=KRT2 PE=1 SV=2	0	126.627	44	22	39	17	1	639	65.4	8	126.2	22	2	100.3	102.5	87.9	108.8	127.5	86.1	Not Found	High	High	High	High	High	High	High	Not Found
FALSE	High	Master Protein	O15460	Prolyl 4-hydroxylase subunit alpha-2 OS=Homo sapiens OX=9606 GN=P4HA2 PE=1 SV=1	0	125.763	48	22	49	22	1	535	60.9	5.71	152.1	22	0	101.7	95.5	101.2	98.3	105	101.9	High	High	High	High	High	High	High	High	High
FALSE	High	Master Protein	P14314	Glucosidase 2 subunit beta OS=Homo sapiens OX=9606 GN=PRKCSH PE=1 SV=2	0	124.44	37	17	49	17	1	528	59.4	4.41	166.68	17	0	100.5	95	100.2	95.9	101.5	109.4	High	High	High	High	High	High	High	High	Not Found
FALSE	High	Master Protein	Q15417	Calponin-3 OS=Homo sapiens OX=9606 GN=CNN3 PE=1 SV=1	0	124.317	53	14	45	12	1	329	36.4	6.05	152.9	14	2	93.4	97.2	96.3	98	100.1	119.9	High	High	High	High	High	High	High	High	Not Found
FALSE	High	Master Protein	Q9Y3I0	RNA-splicing ligase RtcB homolog OS=Homo sapiens OX=9606 GN=RTCB PE=1 SV=1	0	123.301	49	18	32	18	1	505	55.2	7.23	120.16	18	0	99.4	99.7	100.6	98.7	100.1	106.1	Not Found	High	High	High	High	High	High	High	Not Found
FALSE	High	Master Protein	Q9UQ35	Serine/arginine repetitive matrix protein 2 OS=Homo sapiens OX=9606 GN=SRRM2 PE=1 SV=2	0	122.875	12	23	28	23	1	2752	299.4	12.06	96.41	23	0	98.2	99.7	99.9	98	101.1	101.3	Not Found	High	High	High	High	High	High	High	Not Found
FALSE	High	Master Protein	P06748	Nucleophosmin OS=Homo sapiens OX=9606 GN=NPM1 PE=1 SV=2	0	122.036	47	14	77	14	1	294	32.6	4.78	277.54	14	0	106.5	100.3	106.6	98.2	97	90.4	High	High	High	High	High	High	High	High	Not Found
FALSE	High	Master Protein	Q01995	Transgelin OS=Homo sapiens OX=9606 GN=TAGLN PE=1 SV=4	0	121.864	78	16	67	16	1	201	22.6	8.84	190.94	16	0	90	100.5	97.3	109.7	94.6	102.4	High	High	High	High	High	High	High	High	High
FALSE	High	Master Protein	P23526	Adenosylhomocysteinase OS=Homo sapiens OX=9606 GN=AHCY PE=1 SV=4	0	121.592	48	19	37	18	1	432	47.7	6.34	123.78	19	1	90.6	97.5	95.8	102.4	96.4	103.5	Not Found	Not Found	Not Found	High	High	High	High	High	Not Found
FALSE	High	Master Protein	Q04917	14-3-3 protein eta OS=Homo sapiens OX=9606 GN=YWHAH PE=1 SV=4	0	121.558	68	16	66	12	1	246	28.2	4.84	203.85	16	1	96.1	104.4	97.3	107	96	89.5	High	High	High	High	High	High	Not Found	Not Found	Not Found
FALSE	High	Master Protein	Q99439	Calponin-2 OS=Homo sapiens OX=9606 GN=CNN2 PE=1 SV=4	0	121.509	59	14	47	12	1	309	33.7	7.33	150.42	14	0	91.1	93.9	97	106.9	100.4	95.9	Not Found	Not Found	High	High	High	High	High	High	Not Found
FALSE	High	Master Protein	Q99798	Aconitate hydratase, mitochondrial OS=Homo sapiens OX=9606 GN=ACO2 PE=1 SV=2	0	121.349	34	21	32	21	1	780	85.4	7.61	112.71	21	0	108.6	93.1	97.7	94.9	112.9	109.5	Not Found	High	High	High	High	High	High	High	Not Found
FALSE	High	Master Protein	P41252	Isoleucine--tRNA ligase, cytoplasmic OS=Homo sapiens OX=9606 GN=IARS1 PE=1 SV=2	0	120.385	27	26	38	26	1	1262	144.4	6.15	132.23	26	0	97.5	100.2	98.5	101.8	101.3	98.3	High	High	High	High	High	High	High	High	Not Found
FALSE	High	Master Protein	P40227	T-complex protein 1 subunit zeta OS=Homo sapiens OX=9606 GN=CCT6A PE=1 SV=3	0	120.324	49	19	35	19	1	531	58	6.68	123.93	19	0	96.8	103.4	99	103.6	96.8	94.5	Not Found	High	Not Found	High	High	High	High	High	Not Found
FALSE	High	Master Protein	Q9Y696	Chloride intracellular channel protein 4 OS=Homo sapiens OX=9606 GN=CLIC4 PE=1 SV=4	0	119.915	74	16	33	16	1	253	28.8	5.59	131.76	16	0	93.4	105.5	95.5	105.4	95.1	93.2	High	High	High	High	High	High	High	High	Not Found
FALSE	High	Master Protein	P23246	Splicing factor, proline- and glutamine-rich OS=Homo sapiens OX=9606 GN=SFPQ PE=1 SV=2	0	119.651	34	23	46	22	1	707	76.1	9.44	149.4	23	1	102.6	97.8	104.3	95.1	100.5	98.5	High	High	High	High	High	High	High	High	High
FALSE	High	Master Protein	P07195	L-lactate dehydrogenase B chain OS=Homo sapiens OX=9606 GN=LDHB PE=1 SV=2	0	118.424	54	16	81	14	1	334	36.6	6.05	296.82	16	0	96.3	104	101.9	108.8	99.1	103.8	Not Found	Not Found	High	High	High	High	High	High	High
FALSE	High	Master Protein	O60701	UDP-glucose 6-dehydrogenase OS=Homo sapiens OX=9606 GN=UGDH PE=1 SV=1	0	118.298	49	19	25	19	1	494	55	7.12	92	19	0	86.6	89.2	89.1	90.3	95.9	144.7	High	High	High	Not Found	High	High	High	High	Not Found
FALSE	High	Master Protein	P23396	40S ribosomal protein S3 OS=Homo sapiens OX=9606 GN=RPS3 PE=1 SV=2	0	117.962	80	19	80	19	1	243	26.7	9.66	244.04	19	0	103.9	100.7	99.4	94.9	104.1	90.5	High	High	High	High	High	High	High	High	Not Found
FALSE	High	Master Protein	P80723	Brain acid soluble protein 1 OS=Homo sapiens OX=9606 GN=BASP1 PE=1 SV=2	0	116.98	79	14	25	14	1	227	22.7	4.63	113.59	14	0	116.7	132.2	102.4	95.9	88.6	83.6	High	High	High	High	High	Not Found	Not Found	Not Found	High
FALSE	High	Master Protein	P16615	Sarcoplasmic/endoplasmic reticulum calcium ATPase 2 OS=Homo sapiens OX=9606 GN=ATP2A2 PE=1 SV=1	0	116.714	25	22	28	22	1	1042	114.7	5.34	100	22	0	105.8	97.7	102.8	97	103	109.5	Not Found	High	High	High	High	High	High	High	Not Found
FALSE	High	Master Protein	Q9NVA2	Septin-11 OS=Homo sapiens OX=9606 GN=SEPTIN11 PE=1 SV=3	0	116.627	48	17	38	9	1	429	49.4	6.81	149.3	17	9	97.5	100.5	96.5	100.5	101.7	98.8	Not Found	High	High	High	High	High	High	High	Not Found
FALSE	High	Master Protein	P49792	E3 SUMO-protein ligase RanBP2 OS=Homo sapiens OX=9606 GN=RANBP2 PE=1 SV=2	0	116.406	11	26	27	25	1	3224	358	6.2	90.98	26	1	102.5	100.9	102.1	98.3	102.1	95.9	High	High	High	High	High	High	High	High	Not Found
FALSE	High	Master Protein	P15880	40S ribosomal protein S2 OS=Homo sapiens OX=9606 GN=RPS2 PE=1 SV=2	0	116.17	60	18	73	18	1	293	31.3	10.24	219.46	18	0	98.6	97.1	95.5	94.9	102.3	104.3	Not Found	Not Found	High	High	High	High	High	High	Not Found
FALSE	High	Master Protein	Q9ULV4	Coronin-1C OS=Homo sapiens OX=9606 GN=CORO1C PE=1 SV=1	0	116.055	45	23	36	23	1	474	53.2	7.08	110.94	23	0	105.1	106.8	104.6	104.6	94	87.6	High	Not Found	High	High	High	High	High	High	High
FALSE	High	Master Protein	O00425	Insulin-like growth factor 2 mRNA-binding protein 3 OS=Homo sapiens OX=9606 GN=IGF2BP3 PE=1 SV=2	0	115.93	49	24	39	20	1	579	63.7	8.87	119.54	24	3	100	99.1	101	99.6	98.2	96.9	High	High	Not Found	High	High	High	High	High	Not Found
FALSE	High	Master Protein	Q96HC4	PDZ and LIM domain protein 5 OS=Homo sapiens OX=9606 GN=PDLIM5 PE=1 SV=5	0	115.879	34	17	31	17	1	596	63.9	8.21	114.8	17	0	93.3	96.3	94.8	102.5	96.8	107.6	Not Found	High	High	High	High	High	High	High	Not Found
FALSE	High	Master Protein	Q14247	Src substrate cortactin OS=Homo sapiens OX=9606 GN=CTTN PE=1 SV=2	0	115.782	43	22	53	22	1	550	61.5	5.4	173.41	22	0	99.3	102.2	98.5	101.3	97.8	96.1	Not Found	High	High	High	High	High	High	High	Not Found
FALSE	High	Master Protein	Q92841	Probable ATP-dependent RNA helicase DDX17 OS=Homo sapiens OX=9606 GN=DDX17 PE=1 SV=2	0	115.674	31	22	35	16	1	729	80.2	8.27	102.99	22	5	99.7	97.5	102.5	96.2	99.4	97.5	Not Found	High	High	High	High	High	Not Found	High	Not Found
FALSE	High	Master Protein	Q96AE4	Far upstream element-binding protein 1 OS=Homo sapiens OX=9606 GN=FUBP1 PE=1 SV=3	0	115.405	38	19	36	15	1	644	67.5	7.61	114.86	19	1	101.1	100	99.8	98.6	95.1	103.5	Not Found	Not Found	High	High	High	High	Not Found	Not Found	Not Found
FALSE	High	Master Protein	P31943	Heterogeneous nuclear ribonucleoprotein H OS=Homo sapiens OX=9606 GN=HNRNPH1 PE=1 SV=4	0	114.801	46	15	38	7	1	449	49.2	6.3	122.2	15	9	96.4	95.4	101.2	99	101.5	110.1	Not Found	High	High	High	High	High	Not Found	High	Not Found
FALSE	High	Master Protein	Q96TA1	Protein Niban 2 OS=Homo sapiens OX=9606 GN=NIBAN2 PE=1 SV=3	0	114.766	28	19	36	19	1	746	84.1	6.19	120.31	19	0	93.3	93.8	88.7	102.6	104.8	102.4	Not Found	Not Found	High	High	High	High	High	High	Not Found
FALSE	High	Master Protein	O95340	Bifunctional 3'-phosphoadenosine 5'-phosphosulfate synthase 2 OS=Homo sapiens OX=9606 GN=PAPSS2 PE=1 SV=2	0	114.3	35	20	38	18	1	614	69.5	8.03	126.16	20	2	93.5	99.6	97.1	100.9	95.1	100.1	High	High	High	High	High	High	High	High	Not Found
FALSE	High	Master Protein	P13804	Electron transfer flavoprotein subunit alpha, mitochondrial OS=Homo sapiens OX=9606 GN=ETFA PE=1 SV=1	0	113.634	63	16	29	16	1	333	35.1	8.38	108.46	16	0	107.8	100.3	104.1	95.1	108	95	Not Found	Not Found	Not Found	High	High	High	High	High	Not Found
FALSE	High	Master Protein	Q15046	Lysine--tRNA ligase OS=Homo sapiens OX=9606 GN=KARS1 PE=1 SV=3	0	113.596	35	20	31	20	1	597	68	6.35	100.27	20	0	97.7	96.9	96.1	96.3	101.8	111.9	Not Found	High	High	High	High	High	High	High	Not Found
FALSE	High	Master Protein	P26599	Polypyrimidine tract-binding protein 1 OS=Homo sapiens OX=9606 GN=PTBP1 PE=1 SV=1	0	113.476	40	16	30	16	1	531	57.2	9.17	109.81	16	0	102.1	94.9	104.9	95.2	101.7	98.6	High	High	High	High	High	High	High	High	Not Found
FALSE	High	Master Protein	Q8NC51	Plasminogen activator inhibitor 1 RNA-binding protein OS=Homo sapiens OX=9606 GN=SERBP1 PE=1 SV=2	0	113.387	42	17	32	17	1	408	44.9	8.65	114.25	17	0	100.5	109.1	108.4	100	94.2	86.6	Not Found	High	High	High	High	High	High	High	Not Found
FALSE	High	Master Protein	Q06830	Peroxiredoxin-1 OS=Homo sapiens OX=9606 GN=PRDX1 PE=1 SV=1	0	113.237	76	14	86	11	1	199	22.1	8.13	274.75	14	3	99.9	104.7	100.6	104.6	93	93.6	Not Found	High	High	High	High	High	High	High	High
FALSE	High	Master Protein	Q13310	Polyadenylate-binding protein 4 OS=Homo sapiens OX=9606 GN=PABPC4 PE=1 SV=1	0	112.727	36	21	25	14	1	644	70.7	9.26	87.26	21	0	98.4	98.2	101.7	97.3	96.5	102.8	High	Not Found	High	High	High	High	High	High	Not Found
FALSE	High	Master Protein	P31939	Bifunctional purine biosynthesis protein ATIC OS=Homo sapiens OX=9606 GN=ATIC PE=1 SV=3	0	112.652	45	21	25	21	1	592	64.6	6.71	89.01	21	0	93	101.3	99.4	103.2	96	97.7	High	High	High	High	High	High	High	High	Not Found
FALSE	High	Master Protein	P04843	Dolichyl-diphosphooligosaccharide--protein glycosyltransferase subunit 1 OS=Homo sapiens OX=9606 GN=RPN1 PE=1 SV=1	0	112.613	38	22	49	22	1	607	68.5	6.38	154.26	22	0	114.6	100.2	102.9	96.2	106.7	97.7	Not Found	High	High	High	High	High	High	High	High
FALSE	High	Master Protein	O14974	Protein phosphatase 1 regulatory subunit 12A OS=Homo sapiens OX=9606 GN=PPP1R12A PE=1 SV=1	0	112.526	23	24	35	24	1	1030	115.2	5.4	120.15	24	0	102.6	103.1	99.6	97.6	99.4	94.5	High	High	High	High	High	High	High	High	High
FALSE	High	Master Protein	P55884	Eukaryotic translation initiation factor 3 subunit B OS=Homo sapiens OX=9606 GN=EIF3B PE=1 SV=3	0	111.087	26	19	27	19	1	814	92.4	5	90.95	19	0	97.3	101.5	95.8	102.9	98.8	101.3	High	High	High	High	High	High	High	High	High
FALSE	High	Master Protein	P05787	Keratin, type II cytoskeletal 8 OS=Homo sapiens OX=9606 GN=KRT8 PE=1 SV=7	0	110.862	46	25	112	18	1	483	53.7	5.59	300.85	25	3	102.5	94.9	100.4	97.8	107.5	95	High	High	High	High	High	High	Not Found	High	Not Found
FALSE	High	Master Protein	P62424	60S ribosomal protein L7a OS=Homo sapiens OX=9606 GN=RPL7A PE=1 SV=2	0	110.696	45	17	47	17	1	266	30	10.61	175.84	17	0	104.5	105.4	108.7	104.6	102.2	90.9	Not Found	High	Not Found	High	High	High	High	High	Not Found
FALSE	High	Master Protein	Q16881	Thioredoxin reductase 1, cytoplasmic OS=Homo sapiens OX=9606 GN=TXNRD1 PE=1 SV=3	0	110.611	41	19	33	18	1	649	70.9	7.39	113.15	19	1	92.8	101.5	98	105.3	95.9	97.7	Not Found	Not Found	High	High	High	High	High	High	Not Found
FALSE	High	Master Protein	P46777	60S ribosomal protein L5 OS=Homo sapiens OX=9606 GN=RPL5 PE=1 SV=3	0	110.512	45	14	69	14	1	297	34.3	9.72	204.54	14	0	104.3	106.7	103	101.5	96.4	84.5	Not Found	High	High	High	High	High	High	High	Not Found
FALSE	High	Master Protein	Q9Y3F4	Serine-threonine kinase receptor-associated protein OS=Homo sapiens OX=9606 GN=STRAP PE=1 SV=1	0	110.51	59	15	27	15	1	350	38.4	5.12	107.02	15	0	97.7	101.8	100.5	100.1	91.8	92.7	Not Found	Not Found	High	High	High	High	High	High	Not Found
FALSE	High	Master Protein	Q15942	Zyxin OS=Homo sapiens OX=9606 GN=ZYX PE=1 SV=1	0	110.34	42	17	58	17	1	572	61.2	6.67	224.78	17	0	94.7	103	94.8	107	96.4	92.2	High	High	High	High	High	High	High	High	Not Found
FALSE	High	Master Protein	O60841	Eukaryotic translation initiation factor 5B OS=Homo sapiens OX=9606 GN=EIF5B PE=1 SV=4	0	110.332	20	22	26	21	1	1220	138.7	5.49	87.3	22	1	100.8	104.3	99.4	97.4	95.2	98.2	Not Found	High	High	High	High	High	High	High	Not Found
FALSE	High	Master Protein	Q16222	UDP-N-acetylhexosamine pyrophosphorylase OS=Homo sapiens OX=9606 GN=UAP1 PE=1 SV=3	0	109.888	44	16	26	16	1	522	58.7	6.33	101.64	16	0	89.4	98.4	95.1	104.3	94.6	99.4	Not Found	Not Found	High	High	High	High	High	High	Not Found
FALSE	High	Master Protein	P35241	Radixin OS=Homo sapiens OX=9606 GN=RDX PE=1 SV=1	0	109.295	34	23	38	9	1	583	68.5	6.37	130.28	23	0	99.1	97.6	93.6	96.7	102.7	107.4	High	High	High	High	High	Not Found	High	Not Found	Not Found
FALSE	High	Master Protein	P23528	Cofilin-1 OS=Homo sapiens OX=9606 GN=CFL1 PE=1 SV=3	0	108.892	75	16	48	13	1	166	18.5	8.09	152.9	16	3	97	106.5	100.5	110.7	90.7	81.4	Not Found	High	High	High	High	High	High	High	Not Found
FALSE	High	Master Protein	P14868	Aspartate--tRNA ligase, cytoplasmic OS=Homo sapiens OX=9606 GN=DARS1 PE=1 SV=2	0	108.537	47	22	39	22	1	501	57.1	6.55	119.93	22	0	97.8	97.2	97.6	98.8	102	106.4	High	High	High	High	High	High	High	High	Not Found
FALSE	High	Master Protein	Q15019	Septin-2 OS=Homo sapiens OX=9606 GN=SEPTIN2 PE=1 SV=1	0	108.472	65	16	30	16	1	361	41.5	6.6	108.07	16	0	97.9	98.7	96.7	101.8	100.2	100.5	Not Found	High	High	High	High	High	High	High	Not Found
FALSE	High	Master Protein	Q92499	ATP-dependent RNA helicase DDX1 OS=Homo sapiens OX=9606 GN=DDX1 PE=1 SV=2	0	108.061	37	22	38	22	1	740	82.4	7.23	127.03	22	0	100.1	102.4	103.1	99.7	99.1	96.6	Not Found	Not Found	High	High	High	High	High	High	Not Found
FALSE	High	Master Protein	P08195	4F2 cell-surface antigen heavy chain OS=Homo sapiens OX=9606 GN=SLC3A2 PE=1 SV=3	0	107.958	33	18	30	18	1	630	68	5.01	106.12	18	0	107.7	97.5	102.9	96.6	103.6	111.3	High	High	High	High	High	High	High	High	Not Found
FALSE	High	Master Protein	P08648	Integrin alpha-5 OS=Homo sapiens OX=9606 GN=ITGA5 PE=1 SV=2	0	107.884	22	18	43	18	1	1049	114.5	5.77	133.3	18	0	99.1	94.1	95	98.8	103.5	112.6	Not Found	High	High	High	High	High	High	High	Not Found
FALSE	High	Master Protein	P09972	Fructose-bisphosphate aldolase C OS=Homo sapiens OX=9606 GN=ALDOC PE=1 SV=2	0	107.718	46	14	47	8	1	364	39.4	6.87	147.43	14	0	87	91.6	90.5	98.1	105.1	132.8	Not Found	High	High	High	Not Found	High	High	High	Not Found
FALSE	High	Master Protein	P67809	Y-box-binding protein 1 OS=Homo sapiens OX=9606 GN=YBX1 PE=1 SV=3	0	107.537	51	12	34	9	1	324	35.9	9.88	138.13	12	3	101.7	107.2	99.3	95.3	94.5	94.1	High	High	High	High	High	High	High	Not Found	High
FALSE	High	Master Protein	P54577	Tyrosine--tRNA ligase, cytoplasmic OS=Homo sapiens OX=9606 GN=YARS1 PE=1 SV=4	0	107.475	50	24	41	24	1	528	59.1	7.05	127.98	24	0	92.9	100	95.9	100.6	97	100.5	High	High	High	High	High	High	High	High	Not Found
FALSE	High	Master Protein	P54886	Delta-1-pyrroline-5-carboxylate synthase OS=Homo sapiens OX=9606 GN=ALDH18A1 PE=1 SV=2	0	107.436	32	23	30	23	1	795	87.2	7.12	94.18	23	0	107.9	95.4	99.1	92.8	108.3	104.6	High	Not Found	High	High	High	High	High	High	High
FALSE	High	Master Protein	O15231	Zinc finger protein 185 OS=Homo sapiens OX=9606 GN=ZNF185 PE=1 SV=3	0	107.148	37	20	34	20	1	689	73.5	7.01	120.65	20	0	101.9	98.1	102	97	98.9	108.8	High	High	High	High	High	High	High	High	Not Found
FALSE	High	Master Protein	P13645	Keratin, type I cytoskeletal 10 OS=Homo sapiens OX=9606 GN=KRT10 PE=1 SV=6	0	106.666	29	17	40	14	1	584	58.8	5.21	127.07	17	2	96.6	99.9	86.1	126.1	141.8	79.5	Not Found	High	High	High	High	High	High	High	Not Found
FALSE	High	Master Protein	Q9Y265	RuvB-like 1 OS=Homo sapiens OX=9606 GN=RUVBL1 PE=1 SV=1	0	106.424	42	13	18	13	1	456	50.2	6.42	75.74	13	0	93.2	97.9	94.9	97.5	100.1	111.6	Not Found	High	High	High	High	Not Found	High	High	Not Found
FALSE	High	Master Protein	Q16181	Septin-7 OS=Homo sapiens OX=9606 GN=SEPTIN7 PE=1 SV=2	0	106.112	38	16	30	15	1	437	50.6	8.63	111.35	16	0	97.7	98.8	96	102.1	100.5	107.5	Not Found	High	High	High	High	High	High	High	High
FALSE	High	Master Protein	P00505	Aspartate aminotransferase, mitochondrial OS=Homo sapiens OX=9606 GN=GOT2 PE=1 SV=3	0	105.816	57	20	40	20	1	430	47.5	9.01	119.94	20	0	103.2	102.4	103	98.3	105.8	94.1	Not Found	High	High	High	High	High	High	High	Not Found
FALSE	High	Master Protein	P22695	Cytochrome b-c1 complex subunit 2, mitochondrial OS=Homo sapiens OX=9606 GN=UQCRC2 PE=1 SV=3	0	105.539	47	17	31	17	1	453	48.4	8.63	113.61	17	0	103.4	95.1	97.9	95.4	107	109.3	Not Found	Not Found	High	High	High	High	High	High	Not Found
FALSE	High	Master Protein	P47897	Glutamine--tRNA ligase OS=Homo sapiens OX=9606 GN=QARS1 PE=1 SV=1	0	105.454	30	20	25	19	1	775	87.7	7.15	85.41	20	0	98.9	102.8	100.2	98.5	99.2	94	Not Found	Not Found	High	High	High	High	Not Found	High	Not Found
FALSE	High	Master Protein	P46939	Utrophin OS=Homo sapiens OX=9606 GN=UTRN PE=1 SV=2	0	105.355	8	21	22	21	1	3433	394.2	5.33	76.55	21	0	97	93.5	93	95	103.9	136.2	Not Found	High	High	High	High	High	High	High	Not Found
FALSE	High	Master Protein	Q10567	AP-1 complex subunit beta-1 OS=Homo sapiens OX=9606 GN=AP1B1 PE=1 SV=2	0	105.261	23	21	32	6	1	949	104.6	5.06	108.76	21	0	92.4	96.5	102.2	99.9	102.4	99.3	Not Found	Not Found	High	High	Not Found	Not Found	Not Found	High	Not Found
FALSE	High	Master Protein	P35998	26S proteasome regulatory subunit 7 OS=Homo sapiens OX=9606 GN=PSMC2 PE=1 SV=3	0	104.916	51	18	28	18	1	433	48.6	5.95	105.29	18	0	95.5	103	98.9	102.8	97.8	98.3	High	High	High	High	High	High	High	High	Not Found
FALSE	High	Master Protein	P27348	14-3-3 protein theta OS=Homo sapiens OX=9606 GN=YWHAQ PE=1 SV=1	0	104.883	57	14	72	8	1	245	27.7	4.78	220.12	14	0	95	101.2	98.6	106.6	99.4	86.9	High	High	High	High	High	High	High	Not Found	Not Found
FALSE	High	Master Protein	Q9UBG0	C-type mannose receptor 2 OS=Homo sapiens OX=9606 GN=MRC2 PE=1 SV=2	0	104.788	13	17	21	17	1	1479	166.6	5.83	79.6	17	0	109	104.3	102.6	103.9	105.4	100.4	High	High	High	High	High	High	High	High	High
FALSE	High	Master Protein	O94973	AP-2 complex subunit alpha-2 OS=Homo sapiens OX=9606 GN=AP2A2 PE=1 SV=2	0	104.714	25	20	27	8	1	939	103.9	6.96	86.93	20	0	97.9	103.7	101.1	99.2	101.7	98.4	Not Found	Not Found	Not Found	High	High	Not Found	High	High	Not Found
FALSE	High	Master Protein	P26006	Integrin alpha-3 OS=Homo sapiens OX=9606 GN=ITGA3 PE=1 SV=5	0	104.656	18	16	31	16	1	1051	116.5	6.77	112.61	16	0	105.3	99.4	100.7	98.7	105.8	108.8	Not Found	Not Found	High	High	High	High	High	High	High
FALSE	High	Master Protein	Q96D15	Reticulocalbin-3 OS=Homo sapiens OX=9606 GN=RCN3 PE=1 SV=1	0	104.354	49	11	25	11	1	328	37.5	4.89	95.05	11	0	113.4	100	110.9	86.7	103.1	107.7	High	High	High	High	High	Not Found	Not Found	High	High
FALSE	High	Master Protein	P29692	Elongation factor 1-delta OS=Homo sapiens OX=9606 GN=EEF1D PE=1 SV=5	0	103.998	64	14	52	12	1	281	31.1	5.01	231.15	14	2	98.5	101	96.4	99.8	96.1	105.2	High	Not Found	High	High	High	High	High	High	High
FALSE	High	Master Protein	O75533	Splicing factor 3B subunit 1 OS=Homo sapiens OX=9606 GN=SF3B1 PE=1 SV=3	0	103.423	20	20	30	20	1	1304	145.7	7.09	111.54	20	0	99.4	96.6	100.9	95.3	102.7	109.6	Not Found	High	High	High	High	High	High	High	Not Found
FALSE	High	Master Protein	O60716	Catenin delta-1 OS=Homo sapiens OX=9606 GN=CTNND1 PE=1 SV=1	0	103.29	23	19	29	19	1	968	108.1	6.23	95.28	19	0	102.7	98.5	99.5	97.4	103.2	105.6	Not Found	High	High	High	High	High	High	High	Not Found
FALSE	High	Master Protein	Q9C0C2	182 kDa tankyrase-1-binding protein OS=Homo sapiens OX=9606 GN=TNKS1BP1 PE=1 SV=4	0	103.143	18	24	29	24	1	1729	181.7	4.86	95.14	24	0	91.1	99.7	94.3	102.9	99	109.3	High	High	High	High	High	High	High	High	Not Found
FALSE	High	Master Protein	Q16531	DNA damage-binding protein 1 OS=Homo sapiens OX=9606 GN=DDB1 PE=1 SV=1	0	102.699	20	20	27	20	1	1140	126.9	5.26	86.34	20	0	101.2	97.7	99.8	98.6	106.2	103	Not Found	High	High	High	High	High	High	High	Not Found
FALSE	High	Master Protein	P21291	Cysteine and glycine-rich protein 1 OS=Homo sapiens OX=9606 GN=CSRP1 PE=1 SV=3	0	101.836	65	12	32	12	1	193	20.6	8.57	133.22	12	0	90.3	105.2	94.4	111.7	96.1	83.9	Not Found	Not Found	High	High	High	High	High	High	Not Found
FALSE	High	Master Protein	P06756	Integrin alpha-V OS=Homo sapiens OX=9606 GN=ITGAV PE=1 SV=2	0	101.562	23	21	29	21	1	1048	116	5.68	92.3	21	0	102	103.6	99.6	102.5	102.6	104.3	High	High	High	High	High	High	High	High	Not Found
FALSE	High	Master Protein	P06396	Gelsolin OS=Homo sapiens OX=9606 GN=GSN PE=1 SV=1	0	101.551	33	22	54	22	1	782	85.6	6.28	153.96	22	0	93.9	97.8	96.5	104.7	99.6	101.5	High	High	High	High	High	High	High	High	Not Found
FALSE	High	Master Protein	Q92900	Regulator of nonsense transcripts 1 OS=Homo sapiens OX=9606 GN=UPF1 PE=1 SV=2	0	101.234	24	22	26	22	1	1129	124.3	6.61	81.19	22	0	96.5	97.9	97.1	99.2	99.4	104.3	High	Not Found	High	High	High	High	High	High	Not Found
FALSE	High	Master Protein	P07737	Profilin-1 OS=Homo sapiens OX=9606 GN=PFN1 PE=1 SV=2	0	101.223	70	9	52	9	1	140	15	8.27	177.51	9	0	93	101.4	101.1	108.2	93.1	89.6	Not Found	Not Found	High	High	High	High	High	High	Not Found
FALSE	High	Master Protein	P55795	Heterogeneous nuclear ribonucleoprotein H2 OS=Homo sapiens OX=9606 GN=HNRNPH2 PE=1 SV=1	0	101.146	35	12	32	5	1	449	49.2	6.3	92.01	12	0	101.5	96.1	101.3	91	100.5	121.2	Not Found	Not Found	High	High	High	High	High	Not Found	Not Found
FALSE	High	Master Protein	P35222	Catenin beta-1 OS=Homo sapiens OX=9606 GN=CTNNB1 PE=1 SV=1	0	100.884	27	17	23	14	1	781	85.4	5.86	80.78	17	3	103.1	96.1	96.9	96	103.9	114.4	High	High	High	High	High	High	High	High	Not Found
FALSE	High	Master Protein	P36871	Phosphoglucomutase-1 OS=Homo sapiens OX=9606 GN=PGM1 PE=1 SV=3	0	100.768	38	19	26	19	1	562	61.4	6.76	89.3	19	0	91.2	95.2	92.7	104.8	101.3	100.8	High	High	High	High	High	High	High	High	Not Found
FALSE	High	Master Protein	P35527	Keratin, type I cytoskeletal 9 OS=Homo sapiens OX=9606 GN=KRT9 PE=1 SV=3	0	100.521	30	15	22	14	1	623	62	5.24	74.9	15	0	108.5	107.9	116.1	116.7	135.1	78.1	Not Found	High	High	High	High	Not Found	High	Not Found	Not Found
FALSE	High	Master Protein	Q13561	Dynactin subunit 2 OS=Homo sapiens OX=9606 GN=DCTN2 PE=1 SV=4	0	100.516	49	15	25	15	1	401	44.2	5.21	98.19	15	0	94.3	99.5	94	101.6	98.2	112.4	High	High	High	High	High	High	High	High	Not Found
FALSE	High	Master Protein	Q14240	Eukaryotic initiation factor 4A-II OS=Homo sapiens OX=9606 GN=EIF4A2 PE=1 SV=2	0	100.269	38	15	38	4	1	407	46.4	5.48	130.7	15	0	104.1	93.1	95.3	98.7	104.5	107.6	Not Found	Not Found	Not Found	High	High	High	High	Not Found	Not Found
FALSE	High	Master Protein	P04899	Guanine nucleotide-binding protein G(i) subunit alpha-2 OS=Homo sapiens OX=9606 GN=GNAI2 PE=1 SV=3	0	100.153	55	14	24	8	1	355	40.4	5.54	95.27	14	6	110.7	99.1	101.8	98.4	111.2	98.2	High	Not Found	High	High	High	High	High	High	Not Found
FALSE	High	Master Protein	Q14195	Dihydropyrimidinase-related protein 3 OS=Homo sapiens OX=9606 GN=DPYSL3 PE=1 SV=1	0	99.984	41	16	31	12	1	570	61.9	6.49	117.12	16	0	91.8	100.3	93.8	98.7	94.5	106.5	Not Found	High	High	High	High	High	High	High	Not Found
FALSE	High	Master Protein	Q02878	60S ribosomal protein L6 OS=Homo sapiens OX=9606 GN=RPL6 PE=1 SV=3	0	99.604	47	16	61	16	1	288	32.7	10.58	177.47	16	0	101	98.5	102.5	96.5	99.7	100.6	Not Found	High	High	High	High	High	High	High	Not Found
FALSE	High	Master Protein	P21589	5'-nucleotidase OS=Homo sapiens OX=9606 GN=NT5E PE=1 SV=1	0	99.366	37	15	24	15	1	574	63.3	7.03	90.09	15	0	104.7	99	98.9	99.2	105.1	110.3	Not Found	Not Found	High	High	High	High	High	High	Not Found
FALSE	High	Master Protein	P27824	Calnexin OS=Homo sapiens OX=9606 GN=CANX PE=1 SV=2	0	99.184	39	22	33	22	1	592	67.5	4.6	101.75	22	0	120.9	103.6	111.1	101.2	102.7	86	High	High	High	High	High	High	High	High	High
FALSE	High	Master Protein	Q9NYL9	Tropomodulin-3 OS=Homo sapiens OX=9606 GN=TMOD3 PE=1 SV=1	0	99.174	55	16	21	15	1	352	39.6	5.19	86.69	16	1	104.4	108.2	104.7	105.1	99.2	80	Not Found	High	High	High	High	High	High	High	Not Found
FALSE	High	Master Protein	O43143	Pre-mRNA-splicing factor ATP-dependent RNA helicase DHX15 OS=Homo sapiens OX=9606 GN=DHX15 PE=1 SV=2	0	98.981	25	17	26	17	1	795	90.9	7.46	82.63	17	0	99.6	96.9	100.3	98.5	106.2	99	High	High	High	High	Not Found	High	High	High	Not Found
FALSE	High	Master Protein	P04040	Catalase OS=Homo sapiens OX=9606 GN=CAT PE=1 SV=3	0	98.957	35	15	26	15	1	527	59.7	7.39	94.22	15	0	100	96.2	97.1	92.5	102.4	126.9	Not Found	High	High	High	High	High	High	High	Not Found
FALSE	High	Master Protein	P09525	Annexin A4 OS=Homo sapiens OX=9606 GN=ANXA4 PE=1 SV=4	0	98.825	53	16	37	15	1	319	35.9	6.13	110.47	16	0	103.6	97.3	100.3	96.9	106.2	107.7	High	High	High	High	High	High	Not Found	High	Not Found
FALSE	High	Master Protein	Q15365	Poly(rC)-binding protein 1 OS=Homo sapiens OX=9606 GN=PCBP1 PE=1 SV=2	0	98.464	41	10	30	6	1	356	37.5	7.09	105.76	10	6	94.9	94.7	99.4	103.9	96.9	98	Not Found	Not Found	High	High	High	High	High	High	Not Found
FALSE	High	Master Protein	P56192	Methionine--tRNA ligase, cytoplasmic OS=Homo sapiens OX=9606 GN=MARS1 PE=1 SV=2	0	98.414	28	20	26	20	1	900	101.1	6.16	84.34	20	0	92.6	97.7	97.8	98.7	99.1	109.5	Not Found	High	High	High	High	High	High	High	Not Found
FALSE	High	Master Protein	Q13740	CD166 antigen OS=Homo sapiens OX=9606 GN=ALCAM PE=1 SV=2	0	98.259	30	15	30	15	1	583	65.1	6.25	99.2	15	0	112.7	104	107.1	104.9	106.5	97.8	Not Found	Not Found	High	High	High	High	High	High	Not Found
FALSE	High	Master Protein	Q1KMD3	Heterogeneous nuclear ribonucleoprotein U-like protein 2 OS=Homo sapiens OX=9606 GN=HNRNPUL2 PE=1 SV=1	0	98.25	31	19	30	19	1	747	85.1	4.91	95.2	19	0	98.9	98.8	103.5	98.7	101.6	106.7	High	High	High	High	High	High	High	High	Not Found
FALSE	High	Master Protein	O15372	Eukaryotic translation initiation factor 3 subunit H OS=Homo sapiens OX=9606 GN=EIF3H PE=1 SV=1	0	98.076	41	12	21	12	1	352	39.9	6.54	83.77	12	0	97.3	101.4	100.4	100.8	98.9	91.4	Not Found	High	High	High	High	High	High	High	Not Found
FALSE	High	Master Protein	P34897	Serine hydroxymethyltransferase, mitochondrial OS=Homo sapiens OX=9606 GN=SHMT2 PE=1 SV=3	0	97.987	43	18	26	17	1	504	56	8.53	94.12	18	1	106.6	96.6	99.8	97	107.3	104.1	Not Found	High	High	High	High	High	High	High	Not Found
FALSE	High	Master Protein	P67936	Tropomyosin alpha-4 chain OS=Homo sapiens OX=9606 GN=TPM4 PE=1 SV=3	0	97.984	58	19	112	8	1	248	28.5	4.69	332.57	19	12	105.5	120.8	101.2	92.8	89.5	107.5	High	High	High	High	High	High	Not Found	Not Found	Not Found
FALSE	High	Master Protein	P20700	Lamin-B1 OS=Homo sapiens OX=9606 GN=LMNB1 PE=1 SV=2	0	97.532	36	23	47	20	1	586	66.4	5.16	133.18	23	0	100.5	97.4	100.3	94.8	101.3	108.9	High	High	High	High	High	High	High	Not Found	Not Found
FALSE	High	Master Protein	Q86UP2	Kinectin OS=Homo sapiens OX=9606 GN=KTN1 PE=1 SV=1	0	97.452	16	20	23	20	1	1357	156.2	5.64	78.76	20	0	106.4	98.3	104.7	96.3	102.5	106.9	Not Found	High	High	High	High	High	High	Not Found	High
FALSE	High	Master Protein	O43242	26S proteasome non-ATPase regulatory subunit 3 OS=Homo sapiens OX=9606 GN=PSMD3 PE=1 SV=2	0	97.334	40	17	26	17	1	534	60.9	8.44	91.8	17	0	100.8	103.3	102.8	97.2	94.5	95.9	High	High	High	High	High	High	High	High	Not Found
FALSE	High	Master Protein	O75534	Cold shock domain-containing protein E1 OS=Homo sapiens OX=9606 GN=CSDE1 PE=1 SV=2	0	96.961	33	26	28	26	1	798	88.8	6.25	83.84	26	0	96.8	101.6	97.5	98.3	92.8	96.4	High	High	High	High	High	High	High	High	Not Found
FALSE	High	Master Protein	Q6NZI2	Caveolae-associated protein 1 OS=Homo sapiens OX=9606 GN=CAVIN1 PE=1 SV=1	0	96.822	40	15	42	15	1	390	43.5	5.6	137.49	15	0	103.4	98.5	104.4	98.3	101.8	98.9	High	High	High	High	High	High	High	High	High
FALSE	High	Master Protein	Q8NBJ5	Procollagen galactosyltransferase 1 OS=Homo sapiens OX=9606 GN=COLGALT1 PE=1 SV=1	0	96.547	33	21	37	21	1	622	71.6	7.31	115.79	21	0	103.7	97.2	102.5	94.6	105.6	104.9	Not Found	High	High	High	High	High	High	High	Not Found
FALSE	High	Master Protein	P02786	Transferrin receptor protein 1 OS=Homo sapiens OX=9606 GN=TFRC PE=1 SV=2	0	96.332	30	19	28	19	1	760	84.8	6.61	87.85	19	0	108.8	103	105.8	94.3	102.3	101.4	High	High	Not Found	High	High	High	High	High	Not Found
FALSE	High	Master Protein	P12268	Inosine-5'-monophosphate dehydrogenase 2 OS=Homo sapiens OX=9606 GN=IMPDH2 PE=1 SV=2	0	95.863	38	15	21	13	1	514	55.8	6.9	86.54	15	2	93.2	101.5	99.1	102.5	98	94	Not Found	Not Found	Not Found	High	High	High	High	High	Not Found
FALSE	High	Master Protein	P45880	Voltage-dependent anion-selective channel protein 2 OS=Homo sapiens OX=9606 GN=VDAC2 PE=1 SV=2	0	95.489	55	12	48	12	1	294	31.5	7.56	188.92	12	0	107.5	100.9	107.9	97.7	102.6	95.1	Not Found	Not Found	Not Found	High	High	High	High	High	Not Found
FALSE	High	Master Protein	P31150	Rab GDP dissociation inhibitor alpha OS=Homo sapiens OX=9606 GN=GDI1 PE=1 SV=2	0	94.841	45	17	29	10	1	447	50.6	5.14	90.74	17	0	97.6	103.5	96.3	99.3	95	102.3	High	High	High	High	Not Found	High	Not Found	Not Found	High
FALSE	High	Master Protein	P07951	Tropomyosin beta chain OS=Homo sapiens OX=9606 GN=TPM2 PE=1 SV=1	0	94.741	42	16	101	5	1	284	32.8	4.7	290.31	16	0	109.3	118.2	103.2	103.7	91.6	97.7	High	High	High	High	High	High	Not Found	High	High
FALSE	High	Master Protein	Q07866	Kinesin light chain 1 OS=Homo sapiens OX=9606 GN=KLC1 PE=1 SV=2	0	94.673	30	17	22	11	1	573	65.3	6.2	76.37	17	5	100.2	106.9	97.6	104.4	93.3	87.1	High	High	High	High	High	High	High	Not Found	Not Found
FALSE	High	Master Protein	P61158	Actin-related protein 3 OS=Homo sapiens OX=9606 GN=ACTR3 PE=1 SV=3	0	94.427	44	15	35	15	1	418	47.3	5.88	123.48	15	0	96.4	103.1	97.4	100.4	98	94.4	Not Found	High	High	High	High	High	High	High	Not Found
FALSE	High	Master Protein	P61981	14-3-3 protein gamma OS=Homo sapiens OX=9606 GN=YWHAG PE=1 SV=2	0	94.282	58	13	69	8	1	247	28.3	4.89	209.1	13	2	97	109.1	96.9	109.2	94.2	82.6	High	High	High	High	High	High	High	High	Not Found
FALSE	High	Master Protein	P83111	Serine beta-lactamase-like protein LACTB, mitochondrial OS=Homo sapiens OX=9606 GN=LACTB PE=1 SV=2	0	94.012	36	15	23	15	1	547	60.7	8.53	81.95	15	0	103.3	104.1	105	101.6	103.7	93.8	Not Found	High	High	High	High	High	Not Found	High	Not Found
FALSE	High	Master Protein	Q15293	Reticulocalbin-1 OS=Homo sapiens OX=9606 GN=RCN1 PE=1 SV=1	0	93.737	57	13	37	13	1	331	38.9	5	129	13	0	109.6	109.5	108.9	95.6	94	87.7	Not Found	High	High	High	High	High	High	High	Not Found
FALSE	High	Master Protein	P08865	40S ribosomal protein SA OS=Homo sapiens OX=9606 GN=RPSA PE=1 SV=4	0	93.418	54	12	30	12	1	295	32.8	4.87	111.95	12	0	99.1	101	102.1	99.6	101.1	88.1	High	High	High	Not Found	High	High	High	High	Not Found
FALSE	High	Master Protein	Q96AC1	Fermitin family homolog 2 OS=Homo sapiens OX=9606 GN=FERMT2 PE=1 SV=1	0	92.852	25	14	23	14	1	680	77.8	6.7	77.27	14	0	96.8	99.7	95	98.4	101.6	95.4	Not Found	High	High	High	High	High	High	High	Not Found
FALSE	High	Master Protein	O00410	Importin-5 OS=Homo sapiens OX=9606 GN=IPO5 PE=1 SV=4	0	92.835	22	19	27	18	1	1097	123.6	4.94	87.4	19	1	95.3	100.3	97.8	104.4	98.8	96.1	Not Found	Not Found	High	High	High	High	High	High	High
FALSE	High	Master Protein	Q32P28	Prolyl 3-hydroxylase 1 OS=Homo sapiens OX=9606 GN=P3H1 PE=1 SV=2	0	92.779	26	14	32	13	1	736	83.3	5.14	115.2	14	1	100.5	102	102.8	96.9	98.1	101.7	Not Found	High	High	High	High	High	High	High	Not Found
FALSE	High	Master Protein	P63241	Eukaryotic translation initiation factor 5A-1 OS=Homo sapiens OX=9606 GN=EIF5A PE=1 SV=2	0	92.655	66	9	39	3	1	154	16.8	5.24	132.56	9	9	96.2	108.6	98.7	107	92.2	83.4	Not Found	Not Found	Not Found	High	High	High	Not Found	Not Found	High
FALSE	High	Master Protein	Q92598	Heat shock protein 105 kDa OS=Homo sapiens OX=9606 GN=HSPH1 PE=1 SV=1	0	92.644	24	17	22	14	1	858	96.8	5.39	73.88	17	1	96.1	103.4	96.6	101.4	93.8	94	Not Found	Not Found	High	High	High	High	High	High	Not Found
FALSE	High	Master Protein	P41091	Eukaryotic translation initiation factor 2 subunit 3 OS=Homo sapiens OX=9606 GN=EIF2S3 PE=1 SV=3	0	92.451	46	19	31	19	1	472	51.1	8.4	97.18	19	0	98.1	98.1	99.6	96.6	99.6	102.6	Not Found	Not Found	High	High	High	High	High	High	Not Found
FALSE	High	Master Protein	P62195	26S proteasome regulatory subunit 8 OS=Homo sapiens OX=9606 GN=PSMC5 PE=1 SV=1	0	92.375	49	16	24	14	1	406	45.6	7.55	81.36	16	2	96.4	100	97	98	96.4	106.4	Not Found	Not Found	High	High	High	High	High	Not Found	Not Found
FALSE	High	Master Protein	Q8N8S7	Protein enabled homolog OS=Homo sapiens OX=9606 GN=ENAH PE=1 SV=2	0	92.21	32	16	31	16	1	591	66.5	6.93	105.5	16	0	97.2	101.4	95.8	100	95.8	108.8	High	High	High	High	High	High	High	High	Not Found
FALSE	High	Master Protein	P35232	Prohibitin OS=Homo sapiens OX=9606 GN=PHB PE=1 SV=1	0	91.821	54	14	37	14	1	272	29.8	5.76	122.9	14	0	103.9	98.7	103.9	97	101.8	100.6	High	High	High	High	High	High	High	High	High
FALSE	High	Master Protein	P30084	Enoyl-CoA hydratase, mitochondrial OS=Homo sapiens OX=9606 GN=ECHS1 PE=1 SV=4	0	91.8	59	15	22	15	1	290	31.4	8.07	84.85	15	0	105.7	100.7	101.4	97.4	103.9	99	Not Found	Not Found	Not Found	High	High	High	High	High	Not Found
FALSE	High	Master Protein	P09211	Glutathione S-transferase P OS=Homo sapiens OX=9606 GN=GSTP1 PE=1 SV=2	0	91.385	61	10	29	10	1	210	23.3	5.64	102.97	10	0	93.5	101.3	98	104	95.1	86.4	Not Found	High	High	High	High	High	High	High	Not Found
FALSE	High	Master Protein	P11586	C-1-tetrahydrofolate synthase, cytoplasmic OS=Homo sapiens OX=9606 GN=MTHFD1 PE=1 SV=4	0	91.272	24	20	30	20	1	935	101.5	7.3	93.56	20	0	93.8	95.8	97.3	100.2	98.3	109.6	High	High	High	High	High	High	High	High	Not Found
FALSE	High	Master Protein	P60228	Eukaryotic translation initiation factor 3 subunit E OS=Homo sapiens OX=9606 GN=EIF3E PE=1 SV=1	0	91.036	37	14	27	14	1	445	52.2	6.04	82.44	14	0	102.6	100.9	100.4	97.6	100.1	92.2	Not Found	High	High	High	High	High	High	High	Not Found
FALSE	High	Master Protein	Q86V48	Leucine zipper protein 1 OS=Homo sapiens OX=9606 GN=LUZP1 PE=1 SV=2	0	90.978	19	17	20	16	1	1076	120.2	8.5	74.77	17	1	101.1	100	101	92.4	96.8	105.9	Not Found	High	High	High	High	High	Not Found	High	Not Found
FALSE	High	Master Protein	P62879	Guanine nucleotide-binding protein G(I)/G(S)/G(T) subunit beta-2 OS=Homo sapiens OX=9606 GN=GNB2 PE=1 SV=3	0	90.587	41	11	37	3	1	340	37.3	6	121	11	4	105.7	103.2	104	101.7	100.8	90.6	Not Found	Not Found	Not Found	High	High	High	High	Not Found	Not Found
FALSE	High	Master Protein	P25786	Proteasome subunit alpha type-1 OS=Homo sapiens OX=9606 GN=PSMA1 PE=1 SV=1	0	90.425	51	15	26	15	1	263	29.5	6.61	83.74	15	0	95.9	102.9	97.2	105.6	95.3	96.2	High	High	High	High	High	High	High	High	High
FALSE	High	Master Protein	P17858	ATP-dependent 6-phosphofructokinase, liver type OS=Homo sapiens OX=9606 GN=PFKL PE=1 SV=6	0	90.175	23	16	28	11	1	780	85	7.5	90.67	16	1	88.3	99.3	92.2	111.2	100.3	105.3	High	Not Found	High	Not Found	High	High	High	High	Not Found
FALSE	High	Master Protein	P55786	Puromycin-sensitive aminopeptidase OS=Homo sapiens OX=9606 GN=NPEPPS PE=1 SV=2	0	89.846	26	21	23	21	1	919	103.2	5.72	78.19	21	0	91.1	98.3	92.9	104.7	99.3	105.9	High	High	High	High	High	High	High	High	Not Found
FALSE	High	Master Protein	P17844	Probable ATP-dependent RNA helicase DDX5 OS=Homo sapiens OX=9606 GN=DDX5 PE=1 SV=1	0	89.763	33	21	28	15	1	614	69.1	8.92	83.83	21	0	99.2	91.8	101.4	88.4	93.2	88.1	High	High	High	High	High	High	High	Not Found	Not Found
FALSE	High	Master Protein	Q04446	1,4-alpha-glucan-branching enzyme OS=Homo sapiens OX=9606 GN=GBE1 PE=1 SV=3	0	89.532	27	18	33	18	1	702	80.4	6.32	103.22	18	0	89.2	98.1	92.9	111.8	100.1	106.6	Not Found	High	High	High	High	High	High	High	Not Found
FALSE	High	Master Protein	Q99714	3-hydroxyacyl-CoA dehydrogenase type-2 OS=Homo sapiens OX=9606 GN=HSD17B10 PE=1 SV=3	0	89.238	70	12	18	12	1	261	26.9	7.78	70.44	12	0	98.8	97.6	98.5	96.1	103.5	115.5	Not Found	High	High	Not Found	High	High	High	High	Not Found
FALSE	High	Master Protein	P40925	Malate dehydrogenase, cytoplasmic OS=Homo sapiens OX=9606 GN=MDH1 PE=1 SV=4	0	89.236	46	16	34	16	1	334	36.4	7.36	96.69	16	0	93.3	99.9	96.1	102.4	96	98.6	High	Not Found	High	High	High	High	High	High	Not Found
FALSE	High	Master Protein	P17655	Calpain-2 catalytic subunit OS=Homo sapiens OX=9606 GN=CAPN2 PE=1 SV=6	0	89.05	27	14	22	14	1	700	79.9	4.98	75.23	14	0	93.4	99.9	95.9	101.9	97.8	100.3	Not Found	High	High	High	High	High	High	High	Not Found
FALSE	High	Master Protein	P09493	Tropomyosin alpha-1 chain OS=Homo sapiens OX=9606 GN=TPM1 PE=1 SV=2	0	88.817	45	18	86	7	1	284	32.7	4.74	254.03	18	8	105.2	120.4	102.7	96.5	90.9	96	High	High	Not Found	High	High	High	High	Not Found	High
FALSE	High	Master Protein	P46459	Vesicle-fusing ATPase OS=Homo sapiens OX=9606 GN=NSF PE=1 SV=3	0	88.59	25	20	33	19	1	744	82.5	6.95	92.22	20	1	101.3	96.8	101.4	97.5	101.5	105.9	High	High	High	High	High	High	High	High	Not Found
FALSE	High	Master Protein	P06753	Tropomyosin alpha-3 chain OS=Homo sapiens OX=9606 GN=TPM3 PE=1 SV=2	0	88.504	39	16	83	4	1	285	32.9	4.72	240.49	16	0	95.3	117.5	101.7	105.9	83.5	108.9	High	High	Not Found	High	High	High	Not Found	Not Found	Not Found
FALSE	High	Master Protein	P47756	F-actin-capping protein subunit beta OS=Homo sapiens OX=9606 GN=CAPZB PE=1 SV=4	0	88.237	51	12	28	12	1	277	31.3	5.59	92.01	12	0	94.9	97.7	99.4	103.5	97.9	99.7	Not Found	High	High	High	High	High	High	High	High
FALSE	High	Master Protein	O00299	Chloride intracellular channel protein 1 OS=Homo sapiens OX=9606 GN=CLIC1 PE=1 SV=4	0	88.02	69	12	27	12	1	241	26.9	5.17	106.9	12	0	90.5	97.3	94.6	100.7	98.1	107.6	Not Found	High	High	High	Not Found	High	High	High	Not Found
FALSE	High	Master Protein	P48047	ATP synthase subunit O, mitochondrial OS=Homo sapiens OX=9606 GN=ATP5PO PE=1 SV=1	0	87.72	62	10	23	10	1	213	23.3	9.96	87.48	10	0	99.5	98.7	103	98.6	106.1	94.9	Not Found	Not Found	Not Found	High	High	High	High	High	Not Found
FALSE	High	Master Protein	O95373	Importin-7 OS=Homo sapiens OX=9606 GN=IPO7 PE=1 SV=1	0	87.626	19	15	17	15	1	1038	119.4	4.82	61.85	15	0	93.3	99.7	95.4	101.3	99.7	102.9	Not Found	Not Found	High	High	High	High	High	High	Not Found
FALSE	High	Master Protein	P00387	NADH-cytochrome b5 reductase 3 OS=Homo sapiens OX=9606 GN=CYB5R3 PE=1 SV=3	0	87.515	45	11	22	11	1	301	34.2	7.59	86.73	11	0	108	96.1	101.1	95.3	107.2	109.4	Not Found	High	Not Found	High	High	High	High	High	Not Found
FALSE	High	Master Protein	Q9UBS4	DnaJ homolog subfamily B member 11 OS=Homo sapiens OX=9606 GN=DNAJB11 PE=1 SV=1	0	87.446	38	14	30	14	1	358	40.5	6.18	105.68	14	0	103.7	101.5	101.8	95.2	99.2	99.4	High	High	High	High	High	High	Not Found	Not Found	High
FALSE	High	Master Protein	Q3SY69	Mitochondrial 10-formyltetrahydrofolate dehydrogenase OS=Homo sapiens OX=9606 GN=ALDH1L2 PE=1 SV=2	0	87.409	24	20	22	20	1	923	101.7	6.52	67.52	20	0	109.1	97.7	96.9	99.7	110.2	95.9	Not Found	High	High	High	High	High	High	High	Not Found
FALSE	High	Master Protein	P31040	Succinate dehydrogenase [ubiquinone] flavoprotein subunit, mitochondrial OS=Homo sapiens OX=9606 GN=SDHA PE=1 SV=2	0	86.741	32	14	25	14	1	664	72.6	7.39	90.17	14	0	101.3	93.4	93.8	98.4	109.1	122.9	Not Found	High	High	High	High	High	High	High	Not Found
FALSE	High	Master Protein	Q16851	UTP--glucose-1-phosphate uridylyltransferase OS=Homo sapiens OX=9606 GN=UGP2 PE=1 SV=5	0	86.673	39	17	29	17	1	508	56.9	8.15	90.52	17	0	91.8	97.7	94	103.2	98.9	104.1	Not Found	Not Found	Not Found	High	High	High	High	Not Found	Not Found
FALSE	High	Master Protein	P05121	Plasminogen activator inhibitor 1 OS=Homo sapiens OX=9606 GN=SERPINE1 PE=1 SV=1	0	86.394	50	16	31	16	1	402	45	7.2	113.2	16	0	99.5	90.7	96.4	93.2	104.4	114.2	Not Found	High	High	High	High	High	High	High	Not Found
FALSE	High	Master Protein	O75396	Vesicle-trafficking protein SEC22b OS=Homo sapiens OX=9606 GN=SEC22B PE=1 SV=5	0	86.231	47	9	30	9	1	215	24.7	8.51	105.25	9	0	113.5	100.1	108.2	99.6	104.8	103.9	Not Found	High	High	High	High	High	High	High	Not Found
FALSE	High	Master Protein	P12270	Nucleoprotein TPR OS=Homo sapiens OX=9606 GN=TPR PE=1 SV=3	0	86.136	10	21	24	21	1	2363	267.1	5.02	76.44	21	0	100.2	99.3	101	96.1	100.8	104.1	High	Not Found	High	High	High	High	High	High	High
FALSE	High	Master Protein	P18124	60S ribosomal protein L7 OS=Homo sapiens OX=9606 GN=RPL7 PE=1 SV=1	0	86.021	51	14	46	14	1	248	29.2	10.65	153.95	14	0	108.1	101.8	88.6	85.2	112.3	90.1	Not Found	High	High	High	High	High	High	High	Not Found
FALSE	High	Master Protein	Q14847	LIM and SH3 domain protein 1 OS=Homo sapiens OX=9606 GN=LASP1 PE=1 SV=2	0	85.974	48	12	50	12	1	261	29.7	7.05	153.98	12	0	96.6	103.1	95.8	103.2	94.4	95.2	High	High	High	High	High	High	High	High	High
FALSE	High	Master Protein	P51991	Heterogeneous nuclear ribonucleoprotein A3 OS=Homo sapiens OX=9606 GN=HNRNPA3 PE=1 SV=2	0	85.777	36	14	41	10	1	378	39.6	9.01	131.12	14	0	102.3	92.7	104.9	95	102.9	111.7	High	High	High	High	High	High	High	High	High
FALSE	High	Master Protein	Q9NSD9	Phenylalanine--tRNA ligase beta subunit OS=Homo sapiens OX=9606 GN=FARSB PE=1 SV=3	0	85.677	34	19	28	19	1	589	66.1	6.84	86.7	19	0	97.7	98.8	96.9	100.3	99.6	102.7	Not Found	Not Found	High	High	High	High	High	High	Not Found
FALSE	High	Master Protein	O15144	Actin-related protein 2/3 complex subunit 2 OS=Homo sapiens OX=9606 GN=ARPC2 PE=1 SV=1	0	85.556	45	13	28	13	1	300	34.3	7.36	74.42	13	0	99.2	105.9	97.6	104.2	96.1	84.7	High	High	High	High	High	High	High	Not Found	Not Found
FALSE	High	Master Protein	P46063	ATP-dependent DNA helicase Q1 OS=Homo sapiens OX=9606 GN=RECQL PE=1 SV=3	0	85.508	26	15	24	15	1	649	73.4	7.88	73.55	15	0	100.5	95.7	96.7	98.7	104.6	101	High	High	High	High	High	High	High	High	Not Found
FALSE	High	Master Protein	Q13428	Treacle protein OS=Homo sapiens OX=9606 GN=TCOF1 PE=1 SV=3	0	85.424	12	14	16	14	1	1488	152	9.04	57.64	14	0	100.3	98.4	102.8	97.7	99.2	101.6	Not Found	Not Found	Not Found	Not Found	High	High	High	High	Not Found
FALSE	High	Master Protein	Q92896	Golgi apparatus protein 1 OS=Homo sapiens OX=9606 GN=GLG1 PE=1 SV=2	0	84.964	17	18	22	18	1	1179	134.5	6.9	73.48	18	0	105.7	101.4	104.6	100.4	101.1	109.3	High	High	High	High	High	High	High	High	High
FALSE	High	Master Protein	Q9BXJ9	N-alpha-acetyltransferase 15, NatA auxiliary subunit OS=Homo sapiens OX=9606 GN=NAA15 PE=1 SV=1	0	84.93	22	20	27	20	1	866	101.2	7.42	71.98	20	0	97.3	99.6	98.4	97.8	96.8	100.6	Not Found	High	High	High	High	High	High	High	Not Found
FALSE	High	Master Protein	Q7Z6Z7	E3 ubiquitin-protein ligase HUWE1 OS=Homo sapiens OX=9606 GN=HUWE1 PE=1 SV=3	0	84.848	5	17	19	17	1	4374	481.6	5.22	59.37	17	0	91.5	95.6	93.6	101.3	99.8	121.9	Not Found	High	High	High	High	High	High	High	Not Found
FALSE	High	Master Protein	P48444	Coatomer subunit delta OS=Homo sapiens OX=9606 GN=ARCN1 PE=1 SV=1	0	84.625	32	17	29	17	1	511	57.2	6.21	97.83	17	0	93.3	97.9	94.1	101.6	98.2	103.8	Not Found	Not Found	High	High	High	High	High	High	Not Found
FALSE	High	Master Protein	Q9Y266	Nuclear migration protein nudC OS=Homo sapiens OX=9606 GN=NUDC PE=1 SV=1	0	84.586	41	14	26	14	1	331	38.2	5.38	89.62	14	0	94.3	101	97.1	102.2	94.6	93.5	High	High	High	High	High	High	Not Found	High	Not Found
FALSE	High	Master Protein	O43237	Cytoplasmic dynein 1 light intermediate chain 2 OS=Homo sapiens OX=9606 GN=DYNC1LI2 PE=1 SV=1	0	84.367	33	13	16	12	1	492	54.1	6.38	61.17	13	1	96.5	105.3	96.7	106.5	98.1	91.7	Not Found	Not Found	High	High	High	High	High	High	Not Found
FALSE	High	Master Protein	P27635	60S ribosomal protein L10 OS=Homo sapiens OX=9606 GN=RPL10 PE=1 SV=4	0	84.353	45	9	49	9	1	214	24.6	10.08	110.05	9	0	98.7	99.1	99.7	99	98.7	104.7	Not Found	Not Found	High	High	High	High	High	High	Not Found
FALSE	High	Master Protein	P11717	Cation-independent mannose-6-phosphate receptor OS=Homo sapiens OX=9606 GN=IGF2R PE=1 SV=3	0	84.275	8	17	19	17	1	2491	274.2	5.94	61.35	17	0	101.1	99.4	99.4	98.4	103.6	125.1	Not Found	High	High	High	High	High	High	High	Not Found
FALSE	High	Master Protein	Q9UKV3	Apoptotic chromatin condensation inducer in the nucleus OS=Homo sapiens OX=9606 GN=ACIN1 PE=1 SV=2	0	83.492	14	16	18	16	1	1341	151.8	6.43	63.1	16	0	101.6	95.2	98.3	94	103.1	112	High	High	High	Not Found	High	High	High	High	High
FALSE	High	Master Protein	Q27J81	Inverted formin-2 OS=Homo sapiens OX=9606 GN=INF2 PE=1 SV=2	0	83.412	16	16	18	15	1	1249	135.5	5.38	61.81	16	1	100.5	98.1	97.1	93.3	102.9	113.2	Not Found	High	High	High	High	High	High	Not Found	High
FALSE	High	Master Protein	P28331	NADH-ubiquinone oxidoreductase 75 kDa subunit, mitochondrial OS=Homo sapiens OX=9606 GN=NDUFS1 PE=1 SV=3	0	83.312	27	14	16	14	1	727	79.4	6.23	61	14	0	105.7	90.4	98.5	97.6	111.8	100.2	High	High	High	High	Not Found	High	High	High	Not Found
FALSE	High	Master Protein	P50995	Annexin A11 OS=Homo sapiens OX=9606 GN=ANXA11 PE=1 SV=1	0	83.219	30	14	30	14	1	505	54.4	7.65	88.89	14	0	103.2	98.8	99	100.2	99.1	103.2	High	High	High	High	High	High	High	High	Not Found
FALSE	High	Master Protein	O60568	Multifunctional procollagen lysine hydroxylase and glycosyltransferase LH3 OS=Homo sapiens OX=9606 GN=PLOD3 PE=1 SV=1	0	83.091	22	15	22	15	1	738	84.7	6.05	76.42	15	0	103.8	97.4	101.4	95.9	105	104.5	Not Found	High	High	High	High	High	High	High	Not Found
FALSE	High	Master Protein	O94855	Protein transport protein Sec24D OS=Homo sapiens OX=9606 GN=SEC24D PE=1 SV=2	0	82.795	19	18	21	18	1	1032	112.9	7.25	70.39	18	0	93.6	100.4	95.6	104.9	97.5	103.1	Not Found	Not Found	Not Found	High	High	High	High	High	High
FALSE	High	Master Protein	P07910	Heterogeneous nuclear ribonucleoproteins C1/C2 OS=Homo sapiens OX=9606 GN=HNRNPC PE=1 SV=4	0	82.774	39	16	34	16	1	306	33.7	5.08	117.82	16	0	105.8	102.3	110.7	95.6	97.6	85.9	High	High	High	High	High	High	High	High	Not Found
FALSE	High	Master Protein	P38606	V-type proton ATPase catalytic subunit A OS=Homo sapiens OX=9606 GN=ATP6V1A PE=1 SV=2	0	82.762	33	16	28	16	1	617	68.3	5.52	97.36	16	0	98.9	99.7	100.3	100.1	98.6	93.7	Not Found	Not Found	High	High	High	High	High	High	Not Found
FALSE	High	Master Protein	P07954	Fumarate hydratase, mitochondrial OS=Homo sapiens OX=9606 GN=FH PE=1 SV=3	0	82.741	39	15	23	15	1	510	54.6	8.76	77.15	15	0	108.2	99.9	101.9	95.8	101.7	96	High	High	High	High	High	High	High	High	Not Found
FALSE	High	Master Protein	P12236	ADP/ATP translocase 3 OS=Homo sapiens OX=9606 GN=SLC25A6 PE=1 SV=4	0	82.564	53	15	40	1	1	298	32.8	9.74	119.1	15	4	104.9	94.5	99.9	89.1	102.6	117.3	Not Found	Not Found	Not Found	Not Found	Not Found	Not Found	High	High	Not Found
FALSE	High	Master Protein	P50570	Dynamin-2 OS=Homo sapiens OX=9606 GN=DNM2 PE=1 SV=2	0	82.226	24	17	17	17	1	870	98	7.44	58.34	17	0	93.7	99.5	92.1	103	96.6	111.3	Not Found	High	High	High	High	Not Found	High	High	Not Found
FALSE	High	Master Protein	O00231	26S proteasome non-ATPase regulatory subunit 11 OS=Homo sapiens OX=9606 GN=PSMD11 PE=1 SV=3	0	82.097	46	17	19	17	1	422	47.4	6.48	64.24	17	0	97.5	99.3	98.1	100	100	103.6	Not Found	High	Not Found	High	High	High	High	High	Not Found
FALSE	High	Master Protein	Q9H4M9	EH domain-containing protein 1 OS=Homo sapiens OX=9606 GN=EHD1 PE=1 SV=2	0	81.829	34	16	23	14	1	534	60.6	6.83	74.34	16	2	93.6	96.5	94.6	101.2	99.8	104.1	Not Found	Not Found	High	High	High	High	High	High	Not Found
FALSE	High	Master Protein	P26639	Threonine--tRNA ligase 1, cytoplasmic OS=Homo sapiens OX=9606 GN=TARS1 PE=1 SV=3	0	81.816	30	17	21	17	1	723	83.4	6.67	64.39	17	0	94.8	102.5	96.5	102.5	96.9	90.8	Not Found	High	High	High	High	High	High	Not Found	Not Found
FALSE	High	Master Protein	P62701	40S ribosomal protein S4, X isoform OS=Homo sapiens OX=9606 GN=RPS4X PE=1 SV=2	0	81.746	52	14	31	14	1	263	29.6	10.15	96.31	14	0	103.8	100.4	101.6	95.8	99.6	97.5	Not Found	Not Found	High	High	High	High	High	High	Not Found
FALSE	High	Master Protein	O75643	U5 small nuclear ribonucleoprotein 200 kDa helicase OS=Homo sapiens OX=9606 GN=SNRNP200 PE=1 SV=2	0	81.708	10	18	20	18	1	2136	244.4	6.06	66.26	18	0	99.6	97.6	97.8	96.7	104.5	111.2	High	High	High	High	High	High	High	High	Not Found
FALSE	High	Master Protein	Q96CX2	BTB/POZ domain-containing protein KCTD12 OS=Homo sapiens OX=9606 GN=KCTD12 PE=1 SV=1	0	81.673	42	12	30	12	1	325	35.7	5.64	96.43	12	0	100.6	100.4	99.7	96.4	101.8	106.9	High	High	High	High	High	High	High	Not Found	High
FALSE	High	Master Protein	Q15029	116 kDa U5 small nuclear ribonucleoprotein component OS=Homo sapiens OX=9606 GN=EFTUD2 PE=1 SV=1	0	81.433	22	17	21	16	1	972	109.4	5	69.91	17	0	99.5	97.6	100.9	99.4	102.7	98.8	Not Found	High	Not Found	High	High	High	High	High	Not Found
FALSE	High	Master Protein	Q9NR12	PDZ and LIM domain protein 7 OS=Homo sapiens OX=9606 GN=PDLIM7 PE=1 SV=1	0	80.659	34	14	26	14	1	457	49.8	8.41	80.39	14	0	97.9	99.6	95.8	107.2	97.9	102.5	Not Found	High	High	High	High	High	High	High	Not Found
FALSE	High	Master Protein	Q16270	Insulin-like growth factor-binding protein 7 OS=Homo sapiens OX=9606 GN=IGFBP7 PE=1 SV=1	0	80.613	50	11	23	11	1	282	29.1	7.9	82.89	11	0	97.5	95.8	97.9	99.7	106.5	119.7	High	High	High	High	High	High	High	Not Found	High
FALSE	High	Master Protein	Q9Y262	Eukaryotic translation initiation factor 3 subunit L OS=Homo sapiens OX=9606 GN=EIF3L PE=1 SV=1	0	80.594	32	17	27	17	1	564	66.7	6.34	91.58	17	0	98.6	100.9	99.4	98.9	99.6	97.7	High	High	High	High	High	High	High	High	Not Found
FALSE	High	Master Protein	P29279	CCN family member 2 OS=Homo sapiens OX=9606 GN=CCN2 PE=1 SV=2	0	80.545	50	16	20	16	1	349	38.1	8	60.37	16	0	107.6	106.6	105.2	100.8	101.3	91.5	High	Not Found	High	High	High	High	Not Found	High	Not Found
FALSE	High	Master Protein	P05388	60S acidic ribosomal protein P0 OS=Homo sapiens OX=9606 GN=RPLP0 PE=1 SV=1	0	80.5	40	11	38	11	1	317	34.3	5.97	113.82	11	0	99.3	97.6	100.9	94.7	98	108.8	High	High	Not Found	High	High	High	High	High	Not Found
FALSE	High	Master Protein	P60900	Proteasome subunit alpha type-6 OS=Homo sapiens OX=9606 GN=PSMA6 PE=1 SV=1	0	80.462	46	12	27	12	1	246	27.4	6.76	105.36	12	0	93.5	97.6	97.9	101.2	100.6	108.9	Not Found	Not Found	High	High	High	High	High	Not Found	Not Found
FALSE	High	Master Protein	O43390	Heterogeneous nuclear ribonucleoprotein R OS=Homo sapiens OX=9606 GN=HNRNPR PE=1 SV=1	0	80.33	26	15	26	8	1	633	70.9	8.13	85.85	15	0	100.9	99.2	100.8	94.5	101.1	102.9	Not Found	Not Found	High	High	High	Not Found	Not Found	Not Found	Not Found
FALSE	High	Master Protein	P28838	Cytosol aminopeptidase OS=Homo sapiens OX=9606 GN=LAP3 PE=1 SV=3	0	80.282	29	13	17	13	1	519	56.1	7.93	66.12	13	0	97.3	99.5	98.3	102.5	97.3	100.4	High	High	High	High	High	High	High	High	Not Found
FALSE	High	Master Protein	O95817	BAG family molecular chaperone regulator 3 OS=Homo sapiens OX=9606 GN=BAG3 PE=1 SV=3	0	80.113	29	13	24	13	1	575	61.6	6.95	85.12	13	0	98.3	104.1	97	98.8	89.8	101.7	Not Found	High	High	High	High	High	High	High	High
FALSE	High	Master Protein	Q14257	Reticulocalbin-2 OS=Homo sapiens OX=9606 GN=RCN2 PE=1 SV=1	0	80.105	38	8	19	8	1	317	36.9	4.4	66.73	8	0	102.9	102.9	103.2	93.1	100.5	109.2	Not Found	High	High	High	High	Not Found	Not Found	Not Found	Not Found
FALSE	High	Master Protein	Q13409	Cytoplasmic dynein 1 intermediate chain 2 OS=Homo sapiens OX=9606 GN=DYNC1I2 PE=1 SV=3	0	80.104	27	13	22	13	1	638	71.4	5.2	76.89	13	0	94.9	101.6	99.7	109.2	96.2	93.3	High	High	High	High	High	High	Not Found	High	High
FALSE	High	Master Protein	P35613	Basigin OS=Homo sapiens OX=9606 GN=BSG PE=1 SV=2	0	80.067	26	9	28	9	1	385	42.2	5.66	106.88	9	0	102.1	98.9	100.7	106.5	108.6	99.4	Not Found	High	High	High	High	High	High	High	Not Found
FALSE	High	Master Protein	P23284	Peptidyl-prolyl cis-trans isomerase B OS=Homo sapiens OX=9606 GN=PPIB PE=1 SV=2	0	80.042	56	13	77	12	1	216	23.7	9.41	209.89	13	1	106	104.1	109.4	101.8	103	87.6	High	High	High	High	High	High	High	High	High
FALSE	High	Master Protein	P60660	Myosin light polypeptide 6 OS=Homo sapiens OX=9606 GN=MYL6 PE=1 SV=2	0	80.018	60	9	49	9	1	151	16.9	4.65	161.39	9	0	107.8	106.8	105.2	95.3	98.2	97.6	High	High	High	High	High	High	High	High	Not Found
FALSE	High	Master Protein	P04844	Dolichyl-diphosphooligosaccharide--protein glycosyltransferase subunit 2 OS=Homo sapiens OX=9606 GN=RPN2 PE=1 SV=3	0	79.893	26	11	19	11	1	631	69.2	5.69	71.29	11	0	115.3	98.9	102.8	97.5	109.6	95.3	Not Found	Not Found	High	High	High	High	High	High	Not Found
FALSE	High	Master Protein	P52209	6-phosphogluconate dehydrogenase, decarboxylating OS=Homo sapiens OX=9606 GN=PGD PE=1 SV=3	0	79.857	31	13	19	13	1	483	53.1	7.23	68.97	13	0	95.4	106.2	99.7	108.3	91.6	81.5	Not Found	Not Found	High	High	High	High	High	High	Not Found
FALSE	High	Master Protein	O14617	AP-3 complex subunit delta-1 OS=Homo sapiens OX=9606 GN=AP3D1 PE=1 SV=1	0	79.804	14	11	15	11	1	1153	130.1	8.48	59.7	11	0	96.9	103.4	97.8	102	95.4	100.9	Not Found	High	High	High	High	High	High	High	Not Found
FALSE	High	Master Protein	Q15233	Non-POU domain-containing octamer-binding protein OS=Homo sapiens OX=9606 GN=NONO PE=1 SV=4	0	79.589	40	17	33	15	1	471	54.2	8.95	105.31	17	1	101.6	98.6	101.9	96	99.9	101.6	Not Found	Not Found	High	High	High	High	High	High	High
FALSE	High	Master Protein	P12081	Histidine--tRNA ligase, cytoplasmic OS=Homo sapiens OX=9606 GN=HARS1 PE=1 SV=2	0	79.458	35	16	20	11	1	509	57.4	5.88	65.69	16	5	97.4	102.1	98	105.7	96.8	90	Not Found	High	High	High	High	High	High	Not Found	Not Found
FALSE	High	Master Protein	P24752	Acetyl-CoA acetyltransferase, mitochondrial OS=Homo sapiens OX=9606 GN=ACAT1 PE=1 SV=1	0	79.319	37	13	16	13	1	427	45.2	8.85	61.37	13	0	105.5	101.4	99.8	99.6	102.8	100.5	Not Found	High	High	High	High	High	High	High	Not Found
FALSE	High	Master Protein	Q8WVM8	Sec1 family domain-containing protein 1 OS=Homo sapiens OX=9606 GN=SCFD1 PE=1 SV=4	0	79.174	31	15	22	15	1	642	72.3	6.27	75.24	15	0	98	96.2	97.2	97.2	103.1	112.5	High	High	Not Found	High	High	High	High	High	High
FALSE	High	Master Protein	P35555	Fibrillin-1 OS=Homo sapiens OX=9606 GN=FBN1 PE=1 SV=4	0	78.969	9	20	24	18	1	2871	312.1	4.93	65.72	20	2	101.2	104	100	97.1	101.9	108.2	High	High	High	High	High	High	Not Found	High	Not Found
FALSE	High	Master Protein	P09429	High mobility group protein B1 OS=Homo sapiens OX=9606 GN=HMGB1 PE=1 SV=3	0	78.908	40	10	28	7	1	215	24.9	5.74	105.23	10	3	94.3	96.5	103	111.6	100.8	82.8	Not Found	Not Found	Not Found	High	High	High	High	High	Not Found
FALSE	High	Master Protein	Q9UJZ1	Stomatin-like protein 2, mitochondrial OS=Homo sapiens OX=9606 GN=STOML2 PE=1 SV=1	0	78.416	39	9	15	9	1	356	38.5	7.39	59.64	9	0	102.6	102.1	101.1	94.2	104.1	103.5	Not Found	High	High	High	High	High	High	High	Not Found
FALSE	High	Master Protein	P61160	Actin-related protein 2 OS=Homo sapiens OX=9606 GN=ACTR2 PE=1 SV=1	0	78.321	37	13	36	12	1	394	44.7	6.74	116.37	13	0	95.3	98.3	97.3	104	99.2	97.2	High	High	Not Found	High	High	High	High	High	Not Found
FALSE	High	Master Protein	P61163	Alpha-centractin OS=Homo sapiens OX=9606 GN=ACTR1A PE=1 SV=1	0	78.073	47	16	31	9	1	376	42.6	6.64	99.36	16	4	92.8	100	96.4	102.5	98.6	106.7	High	High	High	High	High	High	Not Found	High	High
FALSE	High	Master Protein	P42765	3-ketoacyl-CoA thiolase, mitochondrial OS=Homo sapiens OX=9606 GN=ACAA2 PE=1 SV=2	0	78.009	46	11	11	11	1	397	41.9	8.09	46.04	11	0	102.4	95.6	103.1	98.8	110.5	101.5	Not Found	Not Found	High	High	High	High	High	High	Not Found
FALSE	High	Master Protein	O43399	Tumor protein D54 OS=Homo sapiens OX=9606 GN=TPD52L2 PE=1 SV=2	0	77.901	49	10	20	10	1	206	22.2	5.36	78.36	10	0	97.5	100.6	100.2	101.9	97.4	91.6	Not Found	High	High	High	High	High	High	Not Found	Not Found
FALSE	High	Master Protein	P05362	Intercellular adhesion molecule 1 OS=Homo sapiens OX=9606 GN=ICAM1 PE=1 SV=2	0	77.869	32	12	17	12	1	532	57.8	7.99	62.06	12	0	99.9	97.4	97.6	100.1	109.6	113.3	High	High	High	High	High	Not Found	High	High	High
FALSE	High	Master Protein	P62140	Serine/threonine-protein phosphatase PP1-beta catalytic subunit OS=Homo sapiens OX=9606 GN=PPP1CB PE=1 SV=3	0	77.699	43	11	24	3	1	327	37.2	6.19	86.1	11	0	92	93.9	96.2	99.4	98.9	115	Not Found	Not Found	Not Found	High	High	Not Found	High	Not Found	Not Found
FALSE	High	Master Protein	P18031	Tyrosine-protein phosphatase non-receptor type 1 OS=Homo sapiens OX=9606 GN=PTPN1 PE=1 SV=1	0	77.618	39	15	20	15	1	435	49.9	6.27	65.45	15	0	106.4	96.3	97.9	97.1	102.2	107.7	Not Found	High	High	High	High	High	High	Not Found	Not Found
FALSE	High	Master Protein	Q9NZN4	EH domain-containing protein 2 OS=Homo sapiens OX=9606 GN=EHD2 PE=1 SV=2	0	77.564	34	15	23	12	1	543	61.1	6.46	73.19	15	2	91.1	95.3	90.5	101.9	103.9	117	Not Found	High	High	High	High	High	High	High	Not Found
FALSE	High	Master Protein	P05141	ADP/ATP translocase 2 OS=Homo sapiens OX=9606 GN=SLC25A5 PE=1 SV=7	0	77.406	44	15	38	4	1	298	32.8	9.69	110.02	15	11	108.5	96.8	101.2	92	102.6	107.4	Not Found	Not Found	Not Found	High	High	High	High	High	Not Found
FALSE	High	Master Protein	P12235	ADP/ATP translocase 1 OS=Homo sapiens OX=9606 GN=SLC25A4 PE=1 SV=4	0	77.31	48	13	30	2	1	298	33	9.76	91.43	13	0	100.8	95.1	94.8	103.6	107.6	115.9	Not Found	Not Found	Not Found	Not Found	High	Not Found	High	Not Found	Not Found
FALSE	High	Master Protein	Q9HDC9	Adipocyte plasma membrane-associated protein OS=Homo sapiens OX=9606 GN=APMAP PE=1 SV=2	0	77.306	44	14	26	14	1	416	46.5	6.16	84.41	14	0	104.9	97.1	101.1	92.9	106.8	104.9	High	High	Not Found	High	High	High	High	High	Not Found
FALSE	High	Master Protein	Q13162	Peroxiredoxin-4 OS=Homo sapiens OX=9606 GN=PRDX4 PE=1 SV=1	0	77.228	62	12	35	10	1	271	30.5	6.29	121.23	12	0	100.2	94.2	104.1	100.5	106.7	99.3	Not Found	High	High	High	High	High	High	High	High
FALSE	High	Master Protein	Q9UHB9	Signal recognition particle subunit SRP68 OS=Homo sapiens OX=9606 GN=SRP68 PE=1 SV=2	0	77.148	28	16	19	16	1	627	70.7	8.56	71.97	16	0	100.2	101.6	99.3	99.7	99.9	97.9	Not Found	High	High	High	High	High	High	High	High
FALSE	High	Master Protein	P54289	Voltage-dependent calcium channel subunit alpha-2/delta-1 OS=Homo sapiens OX=9606 GN=CACNA2D1 PE=1 SV=3	0	77.109	16	15	17	15	1	1103	124.5	5.27	60.08	15	0	105.1	99.8	101.3	96.8	107.6	105.3	Not Found	Not Found	High	High	High	High	High	High	Not Found
FALSE	High	Master Protein	P62873	Guanine nucleotide-binding protein G(I)/G(S)/G(T) subunit beta-1 OS=Homo sapiens OX=9606 GN=GNB1 PE=1 SV=3	0	77.086	46	11	38	5	1	340	37.4	6	129.12	11	0	106.2	98.1	102.7	95.3	103.9	108.3	Not Found	Not Found	Not Found	High	High	High	High	Not Found	Not Found
FALSE	High	Master Protein	P30040	Endoplasmic reticulum resident protein 29 OS=Homo sapiens OX=9606 GN=ERP29 PE=1 SV=4	0	77.063	56	11	23	11	1	261	29	7.31	78.9	11	0	100.7	97.9	102.9	97.8	104.4	96.4	Not Found	High	High	High	High	High	High	High	Not Found
FALSE	High	Master Protein	Q99623	Prohibitin-2 OS=Homo sapiens OX=9606 GN=PHB2 PE=1 SV=2	0	77.014	57	16	39	16	1	299	33.3	9.83	121.84	16	0	105.5	94.6	97.8	92.8	105.5	111.9	High	High	High	High	High	High	High	High	Not Found
FALSE	High	Master Protein	Q9BSJ8	Extended synaptotagmin-1 OS=Homo sapiens OX=9606 GN=ESYT1 PE=1 SV=1	0	76.968	19	17	18	17	1	1104	122.8	5.83	65.21	17	0	103.9	96.3	100.2	96.6	105.5	111.1	Not Found	High	High	High	High	High	High	High	Not Found
FALSE	High	Master Protein	Q9HAV0	Guanine nucleotide-binding protein subunit beta-4 OS=Homo sapiens OX=9606 GN=GNB4 PE=1 SV=3	0	76.852	51	13	30	8	1	340	37.5	6	95.34	13	5	103.2	94.6	102	94.1	105.9	115.8	Not Found	High	Not Found	High	High	High	High	Not Found	Not Found
FALSE	High	Master Protein	Q07157	Tight junction protein ZO-1 OS=Homo sapiens OX=9606 GN=TJP1 PE=1 SV=3	0	76.819	13	17	17	17	1	1748	195.3	6.7	54.48	17	0	96.1	96.6	96.9	99.2	96.7	112.2	High	High	High	High	Not Found	High	High	High	Not Found
FALSE	High	Master Protein	P49023	Paxillin OS=Homo sapiens OX=9606 GN=PXN PE=1 SV=3	0	76.741	28	13	21	13	1	591	64.5	6.19	72.74	13	0	92.9	98	93.7	106.5	94.2	105.6	Not Found	Not Found	High	High	High	High	High	High	Not Found
FALSE	High	Master Protein	P39656	Dolichyl-diphosphooligosaccharide--protein glycosyltransferase 48 kDa subunit OS=Homo sapiens OX=9606 GN=DDOST PE=1 SV=4	0	76.48	44	14	20	14	1	456	50.8	6.55	75.64	14	0	105.6	98	103	96.6	104.6	103.4	Not Found	High	High	High	High	High	High	High	Not Found
FALSE	High	Master Protein	P21281	V-type proton ATPase subunit B, brain isoform OS=Homo sapiens OX=9606 GN=ATP6V1B2 PE=1 SV=3	0	76.447	42	15	20	15	1	511	56.5	5.81	68.19	15	0	97.2	100.4	97.6	101.2	100.2	101.5	Not Found	Not Found	High	High	High	High	High	High	Not Found
FALSE	High	Master Protein	P22307	Sterol carrier protein 2 OS=Homo sapiens OX=9606 GN=SCP2 PE=1 SV=2	0	76.428	23	12	31	12	1	547	59	6.89	93.29	12	0	106.2	102.6	107.9	95.8	103.8	91	Not Found	High	High	High	High	High	High	High	Not Found
FALSE	High	Master Protein	P31930	Cytochrome b-c1 complex subunit 1, mitochondrial OS=Homo sapiens OX=9606 GN=UQCRC1 PE=1 SV=3	0	76.34	39	11	18	11	1	480	52.6	6.37	62.36	11	0	101.8	99.1	96.8	99.6	104.9	106.7	High	High	High	High	High	High	High	High	High
FALSE	High	Master Protein	Q9Y277	Voltage-dependent anion-selective channel protein 3 OS=Homo sapiens OX=9606 GN=VDAC3 PE=1 SV=1	0	76.25	50	11	21	10	1	283	30.6	8.66	81.45	11	0	104.5	99.5	104.7	98	106.5	98.1	Not Found	Not Found	Not Found	High	High	High	High	High	Not Found
FALSE	High	Master Protein	P15121	Aldo-keto reductase family 1 member B1 OS=Homo sapiens OX=9606 GN=AKR1B1 PE=1 SV=3	0	76.21	43	13	40	12	1	316	35.8	6.98	125.58	13	1	87.6	98.8	92.8	104.6	97.1	95.5	High	High	High	High	High	High	High	High	Not Found
FALSE	High	Master Protein	Q9UNM6	26S proteasome non-ATPase regulatory subunit 13 OS=Homo sapiens OX=9606 GN=PSMD13 PE=1 SV=2	0	76.045	48	18	31	18	1	376	42.9	5.81	90.82	18	0	99.9	99.8	99.6	100.3	102.1	95.8	High	High	High	High	High	High	High	High	Not Found
FALSE	High	Master Protein	P24844	Myosin regulatory light polypeptide 9 OS=Homo sapiens OX=9606 GN=MYL9 PE=1 SV=4	0	75.867	62	8	29	3	1	172	19.8	4.92	96.52	8	0	97.8	91.8	93.1	102.5	104.1	121.4	High	High	Not Found	High	High	Not Found	Not Found	Not Found	Not Found
FALSE	High	Master Protein	P46060	Ran GTPase-activating protein 1 OS=Homo sapiens OX=9606 GN=RANGAP1 PE=1 SV=1	0	75.51	24	12	13	12	1	587	63.5	4.68	45.41	12	0	94.1	95.7	100.4	101.7	98.1	105.2	Not Found	High	High	High	High	High	High	High	Not Found
FALSE	High	Master Protein	P09382	Galectin-1 OS=Homo sapiens OX=9606 GN=LGALS1 PE=1 SV=2	0	75.45	76	8	114	8	1	135	14.7	5.5	426.67	8	0	102.5	115.4	96.8	105.1	93.5	99.5	Not Found	High	High	High	High	High	High	High	Not Found
FALSE	High	Master Protein	P09960	Leukotriene A-4 hydrolase OS=Homo sapiens OX=9606 GN=LTA4H PE=1 SV=2	0	75.436	30	16	17	16	1	611	69.2	6.18	55.01	16	0	94.5	99.1	99.2	105.7	96.6	94.8	Not Found	Not Found	High	High	High	High	High	High	Not Found
FALSE	High	Master Protein	P28066	Proteasome subunit alpha type-5 OS=Homo sapiens OX=9606 GN=PSMA5 PE=1 SV=3	0	75.433	46	9	23	9	1	241	26.4	4.79	88.19	9	0	94.7	101.7	97.3	100.8	95.7	108.6	High	High	High	High	High	High	High	High	Not Found
FALSE	High	Master Protein	Q9NSE4	Isoleucine--tRNA ligase, mitochondrial OS=Homo sapiens OX=9606 GN=IARS2 PE=1 SV=2	0	75.142	19	15	19	15	1	1012	113.7	7.2	67.93	15	0	104.5	94.9	96.7	98.8	113.6	100.7	Not Found	High	High	High	High	High	High	High	Not Found
FALSE	High	Master Protein	O14950	Myosin regulatory light chain 12B OS=Homo sapiens OX=9606 GN=MYL12B PE=1 SV=2	0	75.1	62	8	40	3	1	172	19.8	4.84	147.51	8	8	95.1	100	96.6	101.8	99	110.3	High	High	High	High	High	High	High	Not Found	Not Found
FALSE	High	Master Protein	Q12888	TP53-binding protein 1 OS=Homo sapiens OX=9606 GN=TP53BP1 PE=1 SV=2	0	74.872	10	13	16	13	1	1972	213.4	4.7	59.86	13	0	98.2	99	101.7	94	102.9	117.5	High	High	High	High	Not Found	High	High	High	Not Found
FALSE	High	Master Protein	P43490	Nicotinamide phosphoribosyltransferase OS=Homo sapiens OX=9606 GN=NAMPT PE=1 SV=1	0	74.845	41	16	22	16	1	491	55.5	7.15	70.66	16	0	89.4	93.5	93.3	102.5	100.3	108.3	Not Found	Not Found	High	Not Found	High	High	High	High	Not Found
FALSE	High	Master Protein	P07858	Cathepsin B OS=Homo sapiens OX=9606 GN=CTSB PE=1 SV=3	0	74.832	32	7	36	7	1	339	37.8	6.3	131.03	7	0	100.9	99.2	99.6	97.3	103.5	101.1	Not Found	Not Found	High	High	High	High	High	Not Found	Not Found
FALSE	High	Master Protein	Q9Y230	RuvB-like 2 OS=Homo sapiens OX=9606 GN=RUVBL2 PE=1 SV=3	0	74.531	33	14	20	14	1	463	51.1	5.64	68.02	14	0	94.9	100.2	97.4	102.4	97.9	101.1	Not Found	Not Found	High	High	High	High	High	High	Not Found
FALSE	High	Master Protein	P49588	Alanine--tRNA ligase, cytoplasmic OS=Homo sapiens OX=9606 GN=AARS1 PE=1 SV=2	0	74.353	17	13	17	13	1	968	106.7	5.53	57.22	13	0	94.7	98.5	101.3	103.8	99.5	103	Not Found	High	High	High	High	High	High	High	Not Found
FALSE	High	Master Protein	P62136	Serine/threonine-protein phosphatase PP1-alpha catalytic subunit OS=Homo sapiens OX=9606 GN=PPP1CA PE=1 SV=1	0	74.202	42	11	24	2	1	330	37.5	6.33	85.61	11	9	96.1	97	96.8	97.5	101.9	107.5	Not Found	Not Found	High	Not Found	Not Found	High	Not Found	Not Found	Not Found
FALSE	High	Master Protein	P62820	Ras-related protein Rab-1A OS=Homo sapiens OX=9606 GN=RAB1A PE=1 SV=3	0	74.16	67	13	30	5	1	205	22.7	6.21	95.86	13	7	112.4	102.6	105.3	99.1	101.1	94.7	Not Found	Not Found	Not Found	High	High	High	High	High	Not Found
FALSE	High	Master Protein	P13861	cAMP-dependent protein kinase type II-alpha regulatory subunit OS=Homo sapiens OX=9606 GN=PRKAR2A PE=1 SV=2	0	73.896	37	11	18	11	1	404	45.5	5.07	62.4	11	0	94.9	96	94.2	100.7	102	114.4	High	High	Not Found	High	High	High	High	High	High
FALSE	High	Master Protein	P62979	Ubiquitin-40S ribosomal protein S27a OS=Homo sapiens OX=9606 GN=RPS27A PE=1 SV=2	0	73.816	53	7	63	3	1	156	18	9.64	212.58	7	4	107.6	100.7	98.6	94.5	98.7	93	Not Found	Not Found	High	High	Not Found	High	High	High	Not Found
FALSE	High	Master Protein	Q13177	Serine/threonine-protein kinase PAK 2 OS=Homo sapiens OX=9606 GN=PAK2 PE=1 SV=3	0	73.542	31	13	22	13	1	524	58	5.96	73.27	13	0	93.6	99.7	97.7	103.6	97.2	92.8	Not Found	High	High	High	High	High	High	High	Not Found
FALSE	High	Master Protein	P36776	Lon protease homolog, mitochondrial OS=Homo sapiens OX=9606 GN=LONP1 PE=1 SV=2	0	73.533	19	14	16	14	1	959	106.4	6.39	48.99	14	0	104.9	99.4	99.5	98.8	108.4	98.5	High	High	High	High	Not Found	High	High	High	Not Found
FALSE	High	Master Protein	Q07955	Serine/arginine-rich splicing factor 1 OS=Homo sapiens OX=9606 GN=SRSF1 PE=1 SV=2	0	73.518	48	14	24	14	1	248	27.7	10.36	76.79	14	0	102.3	98.9	103.7	92	100.8	108.2	High	High	High	High	High	High	High	Not Found	Not Found
FALSE	High	Master Protein	Q96QK1	Vacuolar protein sorting-associated protein 35 OS=Homo sapiens OX=9606 GN=VPS35 PE=1 SV=2	0	73.464	23	16	25	16	1	796	91.6	5.49	79.82	16	0	97.4	101.1	97.6	99.8	98.3	105.2	Not Found	High	High	High	High	High	High	High	Not Found
FALSE	High	Master Protein	Q16698	2,4-dienoyl-CoA reductase [(3E)-enoyl-CoA-producing], mitochondrial OS=Homo sapiens OX=9606 GN=DECR1 PE=1 SV=1	0	73.447	44	13	23	13	1	335	36	9.28	78.04	13	0	106.7	97.8	107.8	95.6	105.9	100.2	Not Found	Not Found	High	High	High	High	High	High	Not Found
FALSE	High	Master Protein	P43686	26S proteasome regulatory subunit 6B OS=Homo sapiens OX=9606 GN=PSMC4 PE=1 SV=2	0	73.431	33	12	27	11	1	418	47.3	5.21	89.56	12	0	94.8	100.1	98.9	98	99.1	104.2	Not Found	High	High	High	High	High	High	High	Not Found
FALSE	High	Master Protein	O00116	Alkyldihydroxyacetonephosphate synthase, peroxisomal OS=Homo sapiens OX=9606 GN=AGPS PE=1 SV=1	0	73.163	28	12	15	12	1	658	72.9	7.34	57.86	12	0	101.1	96	100.1	98.3	104.7	104.3	High	Not Found	Not Found	High	High	High	Not Found	High	Not Found
FALSE	High	Master Protein	Q70UQ0	Inhibitor of nuclear factor kappa-B kinase-interacting protein OS=Homo sapiens OX=9606 GN=IKBIP PE=1 SV=1	0	73.126	40	14	21	14	1	350	39.3	9.17	69.46	14	0	100.9	94.5	99.5	100	105.8	107	Not Found	Not Found	High	High	High	High	Not Found	High	Not Found
FALSE	High	Master Protein	Q15459	Splicing factor 3A subunit 1 OS=Homo sapiens OX=9606 GN=SF3A1 PE=1 SV=1	0	73.06	25	15	17	15	1	793	88.8	5.22	60.59	15	0	103.8	102.9	102.6	101	96.6	93.9	Not Found	High	High	High	High	High	High	High	Not Found
FALSE	High	Master Protein	P22392	Nucleoside diphosphate kinase B OS=Homo sapiens OX=9606 GN=NME2 PE=1 SV=1	0	72.978	77	11	55	6	1	152	17.3	8.41	207.25	11	6	90	99.5	95.8	106.5	97.2	101.3	Not Found	High	High	Not Found	High	High	High	High	Not Found
FALSE	High	Master Protein	P62937	Peptidyl-prolyl cis-trans isomerase A OS=Homo sapiens OX=9606 GN=PPIA PE=1 SV=2	0	72.785	67	12	46	11	1	165	18	7.81	107.97	12	0	95.9	106	102.1	109.7	93.9	98.5	Not Found	High	High	High	High	High	High	High	Not Found
FALSE	High	Master Protein	P30041	Peroxiredoxin-6 OS=Homo sapiens OX=9606 GN=PRDX6 PE=1 SV=3	0	72.573	49	11	22	11	1	224	25	6.38	75.94	11	0	93.4	104.2	96.9	109.6	94	90.6	Not Found	High	High	High	High	High	High	High	Not Found
FALSE	High	Master Protein	P20042	Eukaryotic translation initiation factor 2 subunit 2 OS=Homo sapiens OX=9606 GN=EIF2S2 PE=1 SV=2	0	72.482	49	15	24	15	1	333	38.4	5.8	81.55	15	0	97.8	103.7	98.8	102.8	98.2	87.5	Not Found	High	High	High	High	High	High	High	Not Found
FALSE	High	Master Protein	P62333	26S proteasome regulatory subunit 10B OS=Homo sapiens OX=9606 GN=PSMC6 PE=1 SV=1	0	72.439	48	14	20	14	1	389	44.1	7.49	63.63	14	0	94.9	101.9	98.2	100.4	97.7	104	Not Found	High	High	High	High	High	High	High	Not Found
FALSE	High	Master Protein	P50502	Hsc70-interacting protein OS=Homo sapiens OX=9606 GN=ST13 PE=1 SV=2	0	72.357	30	10	17	10	1	369	41.3	5.27	51.37	10	0	93.5	105.6	101.7	101.8	90.1	93	Not Found	High	High	High	High	High	High	High	Not Found
FALSE	High	Master Protein	Q14192	Four and a half LIM domains protein 2 OS=Homo sapiens OX=9606 GN=FHL2 PE=1 SV=3	0	71.99	54	16	27	16	1	279	32.2	7.55	91.8	16	0	97.2	105.8	97.9	110.4	92.1	85.5	Not Found	Not Found	High	High	High	High	High	High	Not Found
FALSE	High	Master Protein	Q9H3P7	Golgi resident protein GCP60 OS=Homo sapiens OX=9606 GN=ACBD3 PE=1 SV=4	0	71.933	27	11	20	11	1	528	60.6	5.06	77.55	11	0	94.8	95.1	95.5	99.4	101.9	116.3	High	High	High	High	High	High	High	Not Found	Not Found
FALSE	High	Master Protein	O14980	Exportin-1 OS=Homo sapiens OX=9606 GN=XPO1 PE=1 SV=1	0	71.704	18	16	21	16	1	1071	123.3	6.06	68.54	16	0	95.2	103.6	98.2	102.4	101.1	98.1	High	Not Found	High	High	High	High	High	Not Found	Not Found
FALSE	High	Master Protein	Q92973	Transportin-1 OS=Homo sapiens OX=9606 GN=TNPO1 PE=1 SV=2	0	71.664	20	14	27	11	1	898	102.3	4.98	76.28	14	3	97.2	103.3	99.4	101.8	96	95.7	High	High	Not Found	High	High	Not Found	High	High	Not Found
FALSE	High	Master Protein	P16070	CD44 antigen OS=Homo sapiens OX=9606 GN=CD44 PE=1 SV=3	0	71.438	13	9	35	9	1	742	81.5	5.33	113.49	9	0	109.3	108.5	101.8	102.5	98.8	90.1	High	High	High	High	High	High	High	High	Not Found
FALSE	High	Master Protein	Q96PK6	RNA-binding protein 14 OS=Homo sapiens OX=9606 GN=RBM14 PE=1 SV=2	0	71.074	23	13	19	13	1	669	69.4	9.67	72.14	13	0	99.5	96.1	99.1	95.5	98.5	109.6	Not Found	Not Found	High	High	High	High	High	Not Found	Not Found
FALSE	High	Master Protein	P28074	Proteasome subunit beta type-5 OS=Homo sapiens OX=9606 GN=PSMB5 PE=1 SV=3	0	70.965	40	9	19	9	1	263	28.5	6.92	60.7	9	0	94.7	99.2	96.3	101.8	98.7	106.7	Not Found	Not Found	High	High	High	High	High	High	Not Found
FALSE	High	Master Protein	P55060	Exportin-2 OS=Homo sapiens OX=9606 GN=CSE1L PE=1 SV=3	0	70.938	18	18	25	18	1	971	110.3	5.77	73.12	18	0	96.8	104.5	98.5	101.7	96.6	93.9	High	High	High	High	High	High	High	High	High
FALSE	High	Master Protein	P39019	40S ribosomal protein S19 OS=Homo sapiens OX=9606 GN=RPS19 PE=1 SV=2	0	70.905	61	12	38	12	1	145	16.1	10.32	118.69	12	0	99.1	94.2	103.7	93.8	99.1	112.1	Not Found	High	High	High	High	High	High	High	Not Found
FALSE	High	Master Protein	P49915	GMP synthase [glutamine-hydrolyzing] OS=Homo sapiens OX=9606 GN=GMPS PE=1 SV=1	0	70.893	24	15	16	15	1	693	76.7	6.87	55.42	15	0	95.1	102.4	100.9	100.6	98.6	97.8	Not Found	High	High	High	High	High	High	High	Not Found
FALSE	High	Master Protein	P12277	Creatine kinase B-type OS=Homo sapiens OX=9606 GN=CKB PE=1 SV=1	0	70.742	47	13	18	13	1	381	42.6	5.59	67.78	13	0	83.1	91.7	86.8	104	102.3	126.9	Not Found	High	High	High	High	High	High	High	Not Found
FALSE	High	Master Protein	P09622	Dihydrolipoyl dehydrogenase, mitochondrial OS=Homo sapiens OX=9606 GN=DLD PE=1 SV=2	0	70.683	23	11	29	11	1	509	54.1	7.85	84.35	11	0	109.1	98.7	102.9	96.2	104.6	98	Not Found	High	High	High	High	High	High	High	Not Found
FALSE	High	Master Protein	P62750	60S ribosomal protein L23a OS=Homo sapiens OX=9606 GN=RPL23A PE=1 SV=1	0	70.616	49	12	33	12	1	156	17.7	10.45	97.48	12	0	102.8	99	106.2	98.3	98.5	91.7	Not Found	Not Found	Not Found	High	High	High	High	Not Found	High
FALSE	High	Master Protein	P29966	Myristoylated alanine-rich C-kinase substrate OS=Homo sapiens OX=9606 GN=MARCKS PE=1 SV=4	0	70.592	31	7	21	7	1	332	31.5	4.45	82.06	7	0	100.9	100.6	97.5	102	97.3	109.6	High	High	High	Not Found	High	Not Found	High	High	High
FALSE	High	Master Protein	O76021	Ribosomal L1 domain-containing protein 1 OS=Homo sapiens OX=9606 GN=RSL1D1 PE=1 SV=3	0	70.406	32	15	22	15	1	490	54.9	10.13	67.25	15	0	103.4	98.1	102.4	91.4	98.3	102.4	High	High	High	High	High	Not Found	High	High	Not Found
FALSE	High	Master Protein	P36873	Serine/threonine-protein phosphatase PP1-gamma catalytic subunit OS=Homo sapiens OX=9606 GN=PPP1CC PE=1 SV=1	0	70.393	40	10	23	1	1	323	37	6.54	81.95	10	0	89.8	102	97.8	96.4	98.3	104.3	Not Found	Not Found	High	Not Found	Not Found	Not Found	Not Found	Not Found	Not Found
FALSE	High	Master Protein	P52597	Heterogeneous nuclear ribonucleoprotein F OS=Homo sapiens OX=9606 GN=HNRNPF PE=1 SV=3	0	70.317	37	12	26	10	1	415	45.6	5.58	83.93	12	0	96.8	96.9	104.1	97.1	96.5	102.1	Not Found	High	High	High	High	High	High	High	High
FALSE	High	Master Protein	Q5JPE7	Nodal modulator 2 OS=Homo sapiens OX=9606 GN=NOMO2 PE=1 SV=1	0	69.966	16	16	21	16	1	1267	139.4	5.76	68.66	16	0	103.6	97.3	97.9	95.3	108.8	103.2	High	High	Not Found	High	High	High	High	Not Found	Not Found
FALSE	High	Master Protein	P37837	Transaldolase OS=Homo sapiens OX=9606 GN=TALDO1 PE=1 SV=2	0	69.838	43	16	35	16	1	337	37.5	6.81	98.85	16	0	99.5	101.2	102.7	105.2	101.5	92.1	High	High	High	High	High	High	High	High	Not Found
FALSE	High	Master Protein	P62714	Serine/threonine-protein phosphatase 2A catalytic subunit beta isoform OS=Homo sapiens OX=9606 GN=PPP2CB PE=1 SV=1	0	69.576	50	12	20	2	1	309	35.6	5.43	70.29	12	12	94.9	99.3	94.9	102.1	98.1	102.8	Not Found	Not Found	High	High	Not Found	Not Found	Not Found	Not Found	Not Found
FALSE	High	Master Protein	Q14444	Caprin-1 OS=Homo sapiens OX=9606 GN=CAPRIN1 PE=1 SV=2	0	69.141	19	14	28	14	1	709	78.3	5.25	88.03	14	0	104.1	100.1	106.2	94.3	96.1	91.1	High	High	Not Found	High	High	High	High	High	High
FALSE	High	Master Protein	Q9UJU6	Drebrin-like protein OS=Homo sapiens OX=9606 GN=DBNL PE=1 SV=1	0	68.999	35	12	19	12	1	430	48.2	5.05	64.53	12	0	90.9	97.1	94.8	103.6	99.2	107.3	High	Not Found	High	High	High	High	High	High	Not Found
FALSE	High	Master Protein	Q02218	2-oxoglutarate dehydrogenase, mitochondrial OS=Homo sapiens OX=9606 GN=OGDH PE=1 SV=3	0	68.795	17	13	16	13	1	1023	115.9	6.86	52.9	13	0	108.7	94.3	96.5	99.4	107.7	106.2	Not Found	High	High	High	High	High	Not Found	High	Not Found
FALSE	High	Master Protein	O15371	Eukaryotic translation initiation factor 3 subunit D OS=Homo sapiens OX=9606 GN=EIF3D PE=1 SV=1	0	68.795	34	13	18	13	1	548	63.9	6.05	60.29	13	0	99.6	98.1	94.5	103.4	102.3	94.6	High	High	High	High	High	High	High	Not Found	High
FALSE	High	Master Protein	P62191	26S proteasome regulatory subunit 4 OS=Homo sapiens OX=9606 GN=PSMC1 PE=1 SV=1	0	68.789	38	14	26	12	1	440	49.2	6.21	87.89	14	0	99.3	105.8	100.5	101.7	96.3	89.5	High	Not Found	High	High	High	High	High	High	Not Found
FALSE	High	Master Protein	O94905	Erlin-2 OS=Homo sapiens OX=9606 GN=ERLIN2 PE=1 SV=1	0	68.747	41	13	29	10	1	339	37.8	5.62	88.71	13	3	105.8	100.6	102.6	98	100.9	99	Not Found	Not Found	High	High	Not Found	High	High	High	Not Found
FALSE	High	Master Protein	Q15366	Poly(rC)-binding protein 2 OS=Homo sapiens OX=9606 GN=PCBP2 PE=1 SV=1	0	68.629	31	9	22	5	1	365	38.6	6.79	71.04	9	0	91.6	94.3	97.2	95.1	97.9	114.5	Not Found	High	High	Not Found	Not Found	Not Found	High	High	Not Found
FALSE	High	Master Protein	P67775	Serine/threonine-protein phosphatase 2A catalytic subunit alpha isoform OS=Homo sapiens OX=9606 GN=PPP2CA PE=1 SV=1	0	68.493	50	12	22	2	1	309	35.6	5.54	76.94	12	0	100.2	102	98.5	105.2	92.3	86.2	Not Found	Not Found	Not Found	High	High	Not Found	Not Found	Not Found	Not Found
FALSE	High	Master Protein	O60814	Histone H2B type 1-K OS=Homo sapiens OX=9606 GN=H2BC12 PE=1 SV=3	0	68.361	59	10	63	2	1	126	13.9	10.32	202.82	10	10	101.6	96.2	102.2	96.8	101.9	109.8	Not Found	Not Found	Not Found	High	High	High	High	High	Not Found
FALSE	High	Master Protein	P62753	40S ribosomal protein S6 OS=Homo sapiens OX=9606 GN=RPS6 PE=1 SV=1	0	68.344	36	10	29	10	1	249	28.7	10.84	100.73	10	0	102	102.4	101.1	100.7	98.6	92.2	High	High	High	High	High	High	High	High	Not Found
FALSE	High	Master Protein	P20073	Annexin A7 OS=Homo sapiens OX=9606 GN=ANXA7 PE=1 SV=3	0	68.186	22	9	16	9	1	488	52.7	5.68	48.86	9	0	93.9	97.1	91.2	103.4	98.3	111.7	High	High	High	High	High	Not Found	Not Found	High	Not Found
FALSE	High	Master Protein	P36957	Dihydrolipoyllysine-residue succinyltransferase component of 2-oxoglutarate dehydrogenase complex, mitochondrial OS=Homo sapiens OX=9606 GN=DLST PE=1 SV=4	0	68.126	27	12	27	12	1	453	48.7	8.95	85.27	12	0	106.2	94.9	101.2	94.3	107.2	108.2	High	High	High	High	High	High	High	High	Not Found
FALSE	High	Master Protein	P16152	Carbonyl reductase [NADPH] 1 OS=Homo sapiens OX=9606 GN=CBR1 PE=1 SV=3	0	67.705	45	8	13	8	1	277	30.4	8.32	56.58	8	0	92.2	98.8	99.8	103.1	99.6	98.5	Not Found	Not Found	Not Found	High	High	High	High	High	Not Found
FALSE	High	Master Protein	O76094	Signal recognition particle subunit SRP72 OS=Homo sapiens OX=9606 GN=SRP72 PE=1 SV=3	0	67.657	26	16	17	15	1	671	74.6	9.26	56.2	16	0	100.8	99.6	98.7	102.4	98.4	97.2	Not Found	Not Found	High	High	High	High	High	High	Not Found
FALSE	High	Master Protein	P09936	Ubiquitin carboxyl-terminal hydrolase isozyme L1 OS=Homo sapiens OX=9606 GN=UCHL1 PE=1 SV=2	0	67.648	54	10	31	10	1	223	24.8	5.48	121.56	10	0	92.2	105.4	99.9	115.2	96.1	78.8	Not Found	Not Found	High	High	High	High	High	High	Not Found
FALSE	High	Master Protein	O75955	Flotillin-1 OS=Homo sapiens OX=9606 GN=FLOT1 PE=1 SV=3	0	67.199	37	12	16	12	1	427	47.3	7.49	59.83	12	0	100	92.2	96.8	94	103.7	126.4	High	High	High	High	High	High	Not Found	High	High
FALSE	High	Master Protein	Q99873	Protein arginine N-methyltransferase 1 OS=Homo sapiens OX=9606 GN=PRMT1 PE=1 SV=3	0	67.164	35	12	16	12	1	371	42.4	5.35	60.86	12	0	102.6	96.3	100.9	100.2	103.9	96.5	Not Found	Not Found	High	High	High	High	High	High	Not Found
FALSE	High	Master Protein	Q92538	Golgi-specific brefeldin A-resistance guanine nucleotide exchange factor 1 OS=Homo sapiens OX=9606 GN=GBF1 PE=1 SV=2	0	67.132	9	13	14	13	1	1859	206.3	5.73	47.56	13	0	99.8	104.6	99.4	99.3	97.3	95.7	Not Found	High	High	High	High	High	High	High	Not Found
FALSE	High	Master Protein	P49257	Protein ERGIC-53 OS=Homo sapiens OX=9606 GN=LMAN1 PE=1 SV=2	0	66.627	33	13	25	12	1	510	57.5	6.77	83.1	13	1	106	103.6	102.7	109	99.6	98	Not Found	High	High	High	High	High	High	High	Not Found
FALSE	High	Master Protein	P23588	Eukaryotic translation initiation factor 4B OS=Homo sapiens OX=9606 GN=EIF4B PE=1 SV=2	0	66.592	24	10	22	10	1	611	69.1	5.73	72.7	10	0	95.3	98.8	94.9	104	93.2	105.1	High	High	High	Not Found	High	High	High	High	High
FALSE	High	Master Protein	Q14677	Clathrin interactor 1 OS=Homo sapiens OX=9606 GN=CLINT1 PE=1 SV=1	0	66.354	21	11	19	11	1	625	68.2	6.42	68.74	11	0	96.7	103.9	94.5	102.2	97	112.3	High	High	High	High	High	High	High	Not Found	Not Found
FALSE	High	Master Protein	Q13435	Splicing factor 3B subunit 2 OS=Homo sapiens OX=9606 GN=SF3B2 PE=1 SV=2	0	66.307	18	15	20	15	1	895	100.2	5.67	60.92	15	0	103	99.2	103	92.4	102.1	103.9	High	High	High	High	High	High	High	High	Not Found
FALSE	High	Master Protein	P20290	Transcription factor BTF3 OS=Homo sapiens OX=9606 GN=BTF3 PE=1 SV=1	0	66.247	63	9	14	9	1	206	22.2	9.38	54.33	9	0	99.9	100	100.1	97.5	94.3	94.1	Not Found	High	High	High	High	High	High	High	Not Found
FALSE	High	Master Protein	Q02790	Peptidyl-prolyl cis-trans isomerase FKBP4 OS=Homo sapiens OX=9606 GN=FKBP4 PE=1 SV=3	0	66.233	42	13	17	13	1	459	51.8	5.43	51.31	13	0	95.9	102.6	97.3	102.5	97.7	105.1	High	High	High	High	High	Not Found	High	High	High
FALSE	High	Master Protein	O15143	Actin-related protein 2/3 complex subunit 1B OS=Homo sapiens OX=9606 GN=ARPC1B PE=1 SV=3	0	66.194	41	11	15	10	1	372	40.9	8.35	67.83	11	1	96	106.5	98.3	106.7	96	85.8	Not Found	Not Found	High	High	High	High	High	High	Not Found
FALSE	High	Master Protein	P38159	RNA-binding motif protein, X chromosome OS=Homo sapiens OX=9606 GN=RBMX PE=1 SV=3	0	66.165	36	15	32	5	1	391	42.3	10.05	89.26	15	9	101	94.7	101.5	92.8	102.3	113.3	Not Found	Not Found	High	High	High	High	High	High	Not Found
FALSE	High	Master Protein	P62280	40S ribosomal protein S11 OS=Homo sapiens OX=9606 GN=RPS11 PE=1 SV=3	0	66.161	56	11	58	11	1	158	18.4	10.3	165.96	11	0	100.5	101.6	102	101	99.6	89.8	Not Found	Not Found	High	High	High	High	High	High	Not Found
FALSE	High	Master Protein	P13798	Acylamino-acid-releasing enzyme OS=Homo sapiens OX=9606 GN=APEH PE=1 SV=4	0	65.938	19	12	14	12	1	732	81.2	5.48	48.38	12	0	94.1	99.2	94.5	103	94.5	107	High	High	High	High	High	High	High	High	Not Found
FALSE	High	Master Protein	P04792	Heat shock protein beta-1 OS=Homo sapiens OX=9606 GN=HSPB1 PE=1 SV=2	0	65.886	48	10	28	10	1	205	22.8	6.4	94.37	10	0	94.3	100.5	94.7	105.4	96.5	101.2	Not Found	High	High	High	High	High	High	High	Not Found
FALSE	High	Master Protein	Q70E73	Ras-associated and pleckstrin homology domains-containing protein 1 OS=Homo sapiens OX=9606 GN=RAPH1 PE=1 SV=3	0	65.879	14	14	16	14	1	1250	135.2	8.85	57.83	14	0	93.9	103.3	96.1	106.9	92.3	96	Not Found	Not Found	High	High	High	High	High	High	High
FALSE	High	Master Protein	Q13283	Ras GTPase-activating protein-binding protein 1 OS=Homo sapiens OX=9606 GN=G3BP1 PE=1 SV=1	0	65.681	27	8	20	8	1	466	52.1	5.52	81.72	8	0	99.9	103.1	102.8	102.1	96.1	82.5	Not Found	Not Found	Not Found	Not Found	High	High	High	High	Not Found
FALSE	High	Master Protein	P43034	Platelet-activating factor acetylhydrolase IB subunit beta OS=Homo sapiens OX=9606 GN=PAFAH1B1 PE=1 SV=2	0	65.67	34	10	16	9	1	410	46.6	7.37	63.03	10	0	96.4	99.5	96	102.5	100.4	97.1	Not Found	Not Found	High	High	High	High	Not Found	High	Not Found
FALSE	High	Master Protein	Q12931	Heat shock protein 75 kDa, mitochondrial OS=Homo sapiens OX=9606 GN=TRAP1 PE=1 SV=3	0	65.589	23	16	23	15	1	704	80.1	8.21	79.05	16	0	110.2	97.2	101.3	92.3	107	101.8	Not Found	Not Found	High	High	High	High	High	High	Not Found
FALSE	High	Master Protein	Q8WWM7	Ataxin-2-like protein OS=Homo sapiens OX=9606 GN=ATXN2L PE=1 SV=2	0	65.558	18	15	21	14	1	1075	113.3	8.59	74.2	15	1	104	102.7	103	99.2	94.4	95.3	Not Found	High	High	High	High	High	Not Found	Not Found	High
FALSE	High	Master Protein	P17812	CTP synthase 1 OS=Homo sapiens OX=9606 GN=CTPS1 PE=1 SV=2	0	65.406	25	14	19	12	1	591	66.6	6.46	64.5	14	2	94.4	103.6	96.2	101.7	91.7	90.9	Not Found	High	High	High	High	High	High	High	Not Found
FALSE	High	Master Protein	Q9H9B4	Sideroflexin-1 OS=Homo sapiens OX=9606 GN=SFXN1 PE=1 SV=4	0	65.396	45	12	21	11	1	322	35.6	9.07	70.82	12	1	101.6	101.4	96.2	95.5	105	106.6	Not Found	Not Found	High	High	High	High	High	High	Not Found
FALSE	High	Master Protein	Q9UNZ2	NSFL1 cofactor p47 OS=Homo sapiens OX=9606 GN=NSFL1C PE=1 SV=2	0	65.246	42	12	13	12	1	370	40.5	5.1	46.41	12	0	94.4	103.7	100.5	102	95.3	98.1	High	High	High	High	High	High	Not Found	Not Found	Not Found
FALSE	High	Master Protein	Q13347	Eukaryotic translation initiation factor 3 subunit I OS=Homo sapiens OX=9606 GN=EIF3I PE=1 SV=1	0	65.124	42	11	25	11	1	325	36.5	5.64	73.04	11	0	98.9	100.7	99.2	99.3	99.9	100.1	Not Found	High	High	High	High	High	High	Not Found	Not Found
FALSE	High	Master Protein	P35237	Serpin B6 OS=Homo sapiens OX=9606 GN=SERPINB6 PE=1 SV=3	0	65.073	39	11	13	11	1	376	42.6	5.27	50.09	11	0	91.4	100.1	92	103.5	100.7	100.9	Not Found	Not Found	High	High	High	High	High	High	Not Found
FALSE	High	Master Protein	O43491	Band 4.1-like protein 2 OS=Homo sapiens OX=9606 GN=EPB41L2 PE=1 SV=1	0	64.917	15	13	15	13	1	1005	112.5	5.44	52.81	13	0	101	100.1	100.1	98	102.3	103.6	Not Found	High	High	High	High	High	High	Not Found	Not Found
FALSE	High	Master Protein	P13807	Glycogen [starch] synthase, muscle OS=Homo sapiens OX=9606 GN=GYS1 PE=1 SV=2	0	64.696	17	12	16	12	1	737	83.7	6.18	62.6	12	0	95.8	100.2	95.7	106.4	104.3	93.6	Not Found	Not Found	High	High	High	High	High	High	Not Found
FALSE	High	Master Protein	P42892	Endothelin-converting enzyme 1 OS=Homo sapiens OX=9606 GN=ECE1 PE=1 SV=2	0	64.683	25	17	24	17	1	770	87.1	5.88	71.19	17	0	100.7	98.4	97.1	99	101.6	113.9	Not Found	Not Found	High	High	High	High	High	High	Not Found
FALSE	High	Master Protein	P38919	Eukaryotic initiation factor 4A-III OS=Homo sapiens OX=9606 GN=EIF4A3 PE=1 SV=4	0	64.636	29	13	19	10	1	411	46.8	6.73	71.86	13	0	95.9	95.2	96.1	92.8	104.4	112.8	Not Found	High	High	High	High	High	High	High	Not Found
FALSE	High	Master Protein	O94874	E3 UFM1-protein ligase 1 OS=Homo sapiens OX=9606 GN=UFL1 PE=1 SV=2	0	64.632	20	14	18	14	1	794	89.5	6.79	57.38	14	0	102.2	99.4	98.3	95.9	102.2	108	Not Found	High	High	High	High	Not Found	High	Not Found	Not Found
FALSE	High	Master Protein	P09110	3-ketoacyl-CoA thiolase, peroxisomal OS=Homo sapiens OX=9606 GN=ACAA1 PE=1 SV=2	0	64.631	37	10	12	10	1	424	44.3	8.44	50.84	10	0	98.3	95.4	97.5	97	103.4	117.9	Not Found	Not Found	Not Found	High	High	High	High	High	Not Found
FALSE	High	Master Protein	Q15393	Splicing factor 3B subunit 3 OS=Homo sapiens OX=9606 GN=SF3B3 PE=1 SV=4	0	64.542	14	16	20	16	1	1217	135.5	5.26	63.51	16	0	99.5	99.6	101.7	97.4	99.5	108.8	High	Not Found	High	Not Found	Not Found	High	High	High	Not Found
FALSE	High	Master Protein	P12004	Proliferating cell nuclear antigen OS=Homo sapiens OX=9606 GN=PCNA PE=1 SV=1	0	64.436	47	10	12	10	1	261	28.8	4.69	50.16	10	0	99.3	98.2	109.2	90	96.4	85.2	Not Found	High	High	High	High	High	Not Found	High	Not Found
FALSE	High	Master Protein	Q9Y6M1	Insulin-like growth factor 2 mRNA-binding protein 2 OS=Homo sapiens OX=9606 GN=IGF2BP2 PE=1 SV=2	0	64.435	31	16	30	13	1	599	66.1	8.46	79.78	16	0	98.9	96.7	99.5	96.7	104.5	111.8	High	High	High	High	High	High	High	High	High
FALSE	High	Master Protein	Q99497	Parkinson disease protein 7 OS=Homo sapiens OX=9606 GN=PARK7 PE=1 SV=2	0	64.346	50	10	23	10	1	189	19.9	6.79	71.75	10	0	91.6	97	97	99.4	92.8	113.3	Not Found	High	High	High	High	High	High	High	Not Found
FALSE	High	Master Protein	A0AVT1	Ubiquitin-like modifier-activating enzyme 6 OS=Homo sapiens OX=9606 GN=UBA6 PE=1 SV=1	0	64.245	13	12	15	12	1	1052	117.9	6.14	47.33	12	0	92	100.1	94	105.5	99.5	103.9	Not Found	Not Found	Not Found	High	High	High	High	Not Found	Not Found
FALSE	High	Master Protein	P55209	Nucleosome assembly protein 1-like 1 OS=Homo sapiens OX=9606 GN=NAP1L1 PE=1 SV=1	0	64.234	31	8	14	7	1	391	45.3	4.46	50.63	8	1	94.8	112.6	93.4	114.1	83.1	80.2	Not Found	Not Found	Not Found	High	High	Not Found	High	High	Not Found
FALSE	High	Master Protein	P09104	Gamma-enolase OS=Homo sapiens OX=9606 GN=ENO2 PE=1 SV=3	0	64.027	39	11	39	7	1	434	47.2	5.03	171.71	11	0	87.4	89.4	92.1	111.5	106.5	113	High	Not Found	Not Found	High	Not Found	High	High	High	Not Found
FALSE	High	Master Protein	Q14978	Nucleolar and coiled-body phosphoprotein 1 OS=Homo sapiens OX=9606 GN=NOLC1 PE=1 SV=2	0	63.935	17	15	24	15	1	699	73.6	9.47	73.15	15	0	106.6	99.8	106.7	91.4	95.3	90.2	Not Found	Not Found	High	High	Not Found	High	High	High	Not Found
FALSE	High	Master Protein	P10768	S-formylglutathione hydrolase OS=Homo sapiens OX=9606 GN=ESD PE=1 SV=2	0	63.805	42	10	17	10	1	282	31.4	7.02	62.58	10	0	90.8	102.9	97.8	109.1	94.8	88.8	Not Found	Not Found	Not Found	High	High	High	High	High	Not Found
FALSE	High	Master Protein	O00151	PDZ and LIM domain protein 1 OS=Homo sapiens OX=9606 GN=PDLIM1 PE=1 SV=4	0	63.792	51	12	15	12	1	329	36	7.02	53.03	12	0	101.3	104.4	99.3	103.5	98.1	96.3	Not Found	Not Found	High	High	High	High	High	High	Not Found
FALSE	High	Master Protein	Q14008	Cytoskeleton-associated protein 5 OS=Homo sapiens OX=9606 GN=CKAP5 PE=1 SV=3	0	63.61	8	15	18	15	1	2032	225.4	7.8	50.95	15	0	98.6	101.2	103.2	99.6	94.1	98.3	Not Found	Not Found	High	High	High	High	High	High	Not Found
FALSE	High	Master Protein	P00491	Purine nucleoside phosphorylase OS=Homo sapiens OX=9606 GN=PNP PE=1 SV=2	0	63.604	46	9	9	9	1	289	32.1	6.95	40.38	9	0	91.7	101	96.1	101.5	97.3	93.2	Not Found	Not Found	Not Found	High	High	High	High	High	Not Found
FALSE	High	Master Protein	Q12797	Aspartyl/asparaginyl beta-hydroxylase OS=Homo sapiens OX=9606 GN=ASPH PE=1 SV=3	0	63.471	18	12	24	12	1	758	85.8	5.01	98.84	12	0	106.5	95.8	102.3	98.2	111.6	105.6	High	High	High	High	High	High	High	High	Not Found
FALSE	High	Master Protein	P62263	40S ribosomal protein S14 OS=Homo sapiens OX=9606 GN=RPS14 PE=1 SV=3	0	63.424	36	5	25	5	1	151	16.3	10.05	107.36	5	0	99.7	97.4	102.3	96.9	100.7	105.9	Not Found	High	High	High	High	High	High	High	Not Found
FALSE	High	Master Protein	P07686	Beta-hexosaminidase subunit beta OS=Homo sapiens OX=9606 GN=HEXB PE=1 SV=3	0	63.368	29	15	20	13	1	556	63.1	6.76	58.19	15	2	99.9	98.1	102.1	96	101.1	108.3	High	High	Not Found	High	High	High	High	High	Not Found
FALSE	High	Master Protein	P38117	Electron transfer flavoprotein subunit beta OS=Homo sapiens OX=9606 GN=ETFB PE=1 SV=3	0	63.336	53	13	23	13	1	255	27.8	8.1	74.9	13	0	105	100	101.1	94.4	107.6	107.5	Not Found	High	High	High	High	Not Found	High	High	Not Found
FALSE	High	Master Protein	Q7L014	Probable ATP-dependent RNA helicase DDX46 OS=Homo sapiens OX=9606 GN=DDX46 PE=1 SV=2	0	63.237	13	13	13	13	1	1031	117.3	9.29	45.62	13	0	102.5	95.6	102.3	96	101.8	105.3	Not Found	High	High	High	Not Found	High	High	High	Not Found
FALSE	High	Master Protein	P51858	Hepatoma-derived growth factor OS=Homo sapiens OX=9606 GN=HDGF PE=1 SV=1	0	63.212	53	12	19	11	1	240	26.8	4.73	50.55	12	0	101.8	114.2	103.2	107.8	94	82.4	High	High	High	High	High	High	Not Found	Not Found	Not Found
FALSE	High	Master Protein	P22234	Multifunctional protein ADE2 OS=Homo sapiens OX=9606 GN=PAICS PE=1 SV=3	0	63.076	33	12	17	12	1	425	47	7.23	58.97	12	0	91.1	96.8	93.7	101.1	100.1	113	High	High	High	High	High	High	High	High	Not Found
FALSE	High	Master Protein	O95302	Peptidyl-prolyl cis-trans isomerase FKBP9 OS=Homo sapiens OX=9606 GN=FKBP9 PE=1 SV=2	0	62.993	28	14	31	13	1	570	63	5.08	90.65	14	0	101.1	99.4	100.6	97.2	104.1	99.8	Not Found	Not Found	High	High	High	High	High	Not Found	Not Found
FALSE	High	Master Protein	P51149	Ras-related protein Rab-7a OS=Homo sapiens OX=9606 GN=RAB7A PE=1 SV=1	0	62.952	54	11	21	11	1	207	23.5	6.7	71.19	11	0	108.4	103.7	103.3	102.2	100.5	95.7	Not Found	Not Found	High	High	High	High	High	High	Not Found
FALSE	High	Master Protein	P49189	4-trimethylaminobutyraldehyde dehydrogenase OS=Homo sapiens OX=9606 GN=ALDH9A1 PE=1 SV=3	0	62.92	27	12	19	12	1	494	53.8	5.87	65.39	12	0	97.6	97.3	99.5	99.8	100.5	102.3	Not Found	High	High	High	High	High	High	High	Not Found
FALSE	High	Master Protein	P47755	F-actin-capping protein subunit alpha-2 OS=Homo sapiens OX=9606 GN=CAPZA2 PE=1 SV=3	0	62.87	49	9	13	7	1	286	32.9	5.85	58.55	9	0	88.7	94.3	95.3	103.8	106.5	103.9	Not Found	High	High	High	Not Found	High	High	High	Not Found
FALSE	High	Master Protein	P36542	ATP synthase subunit gamma, mitochondrial OS=Homo sapiens OX=9606 GN=ATP5F1C PE=1 SV=1	0	62.837	32	9	27	9	1	298	33	9.22	73.72	9	0	107.5	99	103.7	98.9	107.7	89.2	Not Found	Not Found	Not Found	High	High	High	High	High	High
FALSE	High	Master Protein	P50552	Vasodilator-stimulated phosphoprotein OS=Homo sapiens OX=9606 GN=VASP PE=1 SV=3	0	62.725	35	10	14	10	1	380	39.8	8.94	56.81	10	0	96.7	102.7	99.3	102.5	98.6	96.8	Not Found	High	High	High	High	High	High	High	Not Found
FALSE	High	Master Protein	P62906	60S ribosomal protein L10a OS=Homo sapiens OX=9606 GN=RPL10A PE=1 SV=2	0	62.685	41	10	16	10	1	217	24.8	9.94	56.5	10	0	96	96.8	98.1	103.4	95.1	93.7	Not Found	Not Found	High	Not Found	High	High	High	High	Not Found
FALSE	High	Master Protein	P30050	60S ribosomal protein L12 OS=Homo sapiens OX=9606 GN=RPL12 PE=1 SV=1	0	62.668	64	9	26	9	1	165	17.8	9.42	98.74	9	0	101.5	100.6	105.4	95.3	88.3	100.4	Not Found	High	High	High	High	High	High	High	Not Found
FALSE	High	Master Protein	Q7L1Q6	Basic leucine zipper and W2 domain-containing protein 1 OS=Homo sapiens OX=9606 GN=BZW1 PE=1 SV=1	0	62.576	33	15	23	15	1	419	48	5.92	69.88	15	0	97.1	98.6	96.6	101.1	96.3	94.9	Not Found	High	High	High	High	High	High	High	Not Found
FALSE	High	Master Protein	Q86UE4	Protein LYRIC OS=Homo sapiens OX=9606 GN=MTDH PE=1 SV=2	0	62.498	22	10	11	10	1	582	63.8	9.32	41.1	10	0	111.2	101.6	104.1	97.9	104.3	103.5	Not Found	High	High	High	High	Not Found	High	Not Found	Not Found
FALSE	High	Master Protein	Q32MZ4	Leucine-rich repeat flightless-interacting protein 1 OS=Homo sapiens OX=9606 GN=LRRFIP1 PE=1 SV=2	0	62.341	19	11	14	10	1	808	89.2	4.65	44.81	11	0	95.6	100.9	96.4	96.1	98.3	99.6	Not Found	High	High	High	Not Found	High	High	Not Found	Not Found
FALSE	High	Master Protein	P32969	60S ribosomal protein L9 OS=Homo sapiens OX=9606 GN=RPL9 PE=1 SV=1	0	62.281	58	8	30	8	1	192	21.9	9.95	98.43	8	0	99.2	97.3	96.9	94.6	102.9	106.4	High	Not Found	Not Found	Not Found	High	High	High	High	High
FALSE	High	Master Protein	P25789	Proteasome subunit alpha type-4 OS=Homo sapiens OX=9606 GN=PSMA4 PE=1 SV=1	0	62.204	46	11	21	11	1	261	29.5	7.72	79	11	0	98	101.9	100.8	103	99.2	90.5	Not Found	Not Found	Not Found	High	High	High	High	High	Not Found
FALSE	High	Master Protein	Q562R1	Beta-actin-like protein 2 OS=Homo sapiens OX=9606 GN=ACTBL2 PE=1 SV=2	0	62.008	23	8	222	2	1	376	42	5.59	663.08	8	0	90.6	91.6	90.2	93.1	107.8	135.9	Not Found	High	Not Found	Not Found	High	Not Found	Not Found	Not Found	Not Found
FALSE	High	Master Protein	P32119	Peroxiredoxin-2 OS=Homo sapiens OX=9606 GN=PRDX2 PE=1 SV=5	0	61.481	53	10	43	9	1	198	21.9	5.97	128.88	10	0	93.4	101.4	93.6	101.4	95.9	107.5	High	High	High	High	High	High	High	High	Not Found
FALSE	High	Master Protein	P54578	Ubiquitin carboxyl-terminal hydrolase 14 OS=Homo sapiens OX=9606 GN=USP14 PE=1 SV=3	0	61.43	28	14	17	14	1	494	56	5.3	59.51	14	0	96.7	105.1	99	105.8	95.4	83.8	High	Not Found	High	High	High	High	Not Found	High	Not Found
FALSE	High	Master Protein	P48681	Nestin OS=Homo sapiens OX=9606 GN=NES PE=1 SV=2	0	61.376	9	13	14	13	1	1621	177.3	4.36	48.81	13	0	101.5	91.9	98.6	90.4	101.3	127.9	Not Found	High	High	High	Not Found	High	Not Found	High	Not Found
FALSE	High	Master Protein	Q6Y7W6	GRB10-interacting GYF protein 2 OS=Homo sapiens OX=9606 GN=GIGYF2 PE=1 SV=1	0	61.251	10	12	17	12	1	1299	150	5.54	53.1	12	0	96	93.8	97.7	99	97.3	117.4	High	High	High	High	High	High	Not Found	High	High
FALSE	High	Master Protein	P25398	40S ribosomal protein S12 OS=Homo sapiens OX=9606 GN=RPS12 PE=1 SV=3	0	60.912	54	7	27	7	1	132	14.5	7.21	108.81	7	0	103	107.4	109.7	98.6	94.7	85.8	Not Found	Not Found	High	High	High	High	High	High	Not Found
FALSE	High	Master Protein	P20908	Collagen alpha-1(V) chain OS=Homo sapiens OX=9606 GN=COL5A1 PE=1 SV=3	0	60.783	10	13	15	12	1	1838	183.4	5.06	55.61	13	0	124	118.6	125.7	78.8	81.1	98.3	Not Found	Not Found	Not Found	High	High	High	High	High	Not Found
FALSE	High	Master Protein	Q8IWE2	Protein NOXP20 OS=Homo sapiens OX=9606 GN=FAM114A1 PE=1 SV=2	0	60.692	17	8	11	8	1	563	60.7	4.68	45.45	8	0	89.4	99.7	93	107.3	98.7	104.5	Not Found	Not Found	Not Found	High	High	High	High	High	Not Found
FALSE	High	Master Protein	Q08379	Golgin subfamily A member 2 OS=Homo sapiens OX=9606 GN=GOLGA2 PE=1 SV=3	0	60.497	15	10	12	10	1	1002	113	5.02	45.83	10	0	105.4	103.7	103.6	103.2	95.7	94.2	High	High	Not Found	High	High	Not Found	Not Found	High	High
FALSE	High	Master Protein	P78344	Eukaryotic translation initiation factor 4 gamma 2 OS=Homo sapiens OX=9606 GN=EIF4G2 PE=1 SV=1	0	60.424	16	12	17	12	1	907	102.3	7.14	52.7	12	0	95.5	100.4	99.1	100.4	101.4	97	High	High	High	Not Found	High	High	High	High	Not Found
FALSE	High	Master Protein	P51114	Fragile X mental retardation syndrome-related protein 1 OS=Homo sapiens OX=9606 GN=FXR1 PE=1 SV=3	0	60.224	22	11	14	9	1	621	69.7	6.15	43.41	11	1	98.7	101.4	100.4	94.3	101.9	103.3	High	High	Not Found	High	Not Found	High	High	High	Not Found
FALSE	High	Master Protein	Q9Y4G6	Talin-2 OS=Homo sapiens OX=9606 GN=TLN2 PE=1 SV=4	0	60.134	5	12	26	2	1	2542	271.4	5.57	86.36	12	1	108	97.8	97.3	102	86.8	102.9	Not Found	High	Not Found	High	High	High	Not Found	Not Found	Not Found
FALSE	High	Master Protein	Q02543	60S ribosomal protein L18a OS=Homo sapiens OX=9606 GN=RPL18A PE=1 SV=2	0	60.097	44	9	40	9	1	176	20.7	10.71	130.63	9	0	103.2	101.4	102.3	100.4	101.7	89	Not Found	High	High	High	High	High	High	High	Not Found
FALSE	High	Master Protein	Q16630	Cleavage and polyadenylation specificity factor subunit 6 OS=Homo sapiens OX=9606 GN=CPSF6 PE=1 SV=2	0	60.095	18	7	10	7	1	551	59.2	7.15	41.48	7	0	97.8	97.3	98.7	105.8	98.6	99.4	Not Found	Not Found	High	High	High	High	High	Not Found	Not Found
FALSE	High	Master Protein	P27658	Collagen alpha-1(VIII) chain OS=Homo sapiens OX=9606 GN=COL8A1 PE=1 SV=2	0	60.07	11	8	19	8	1	744	73.3	9.61	75.39	8	0	103.8	114.2	104	106	90.4	65.8	Not Found	Not Found	High	High	High	High	High	High	Not Found
FALSE	High	Master Protein	P08603	Complement factor H OS=Homo sapiens OX=9606 GN=CFH PE=1 SV=4	0	60.005	13	13	14	13	1	1231	139	6.61	47.9	13	0	100.3	103.5	99.3	100.9	101	99.5	Not Found	Not Found	High	High	High	High	High	High	Not Found
FALSE	High	Master Protein	P07384	Calpain-1 catalytic subunit OS=Homo sapiens OX=9606 GN=CAPN1 PE=1 SV=1	0	59.92	25	15	21	15	1	714	81.8	5.67	63.61	15	0	95.2	103.2	94.5	106.7	94.6	100.9	Not Found	Not Found	High	High	High	High	High	High	Not Found
FALSE	High	Master Protein	P62241	40S ribosomal protein S8 OS=Homo sapiens OX=9606 GN=RPS8 PE=1 SV=2	0	59.892	51	10	23	10	1	208	24.2	10.32	69.42	10	0	105.3	102	104.9	100.6	99.7	90	Not Found	Not Found	High	High	High	High	High	Not Found	Not Found
FALSE	High	Master Protein	Q5JRX3	Presequence protease, mitochondrial OS=Homo sapiens OX=9606 GN=PITRM1 PE=1 SV=3	0	59.867	18	16	18	16	1	1037	117.3	6.92	57.65	16	0	108.6	94.4	100.6	98.3	110	97.6	Not Found	Not Found	Not Found	High	High	High	High	High	Not Found
FALSE	High	Master Protein	P62805	Histone H4 OS=Homo sapiens OX=9606 GN=H4C1 PE=1 SV=2	0	59.749	51	6	47	6	1	103	11.4	11.36	155.79	6	0	107	96.3	95.9	89.3	108.3	92.9	Not Found	Not Found	High	High	High	High	High	High	Not Found
FALSE	High	Master Protein	Q9NZB2	Constitutive coactivator of PPAR-gamma-like protein 1 OS=Homo sapiens OX=9606 GN=FAM120A PE=1 SV=2	0	59.714	15	13	18	13	1	1118	121.8	8.88	61.15	13	0	106.1	109.7	104.7	105	96.6	86.9	Not Found	Not Found	High	High	High	High	High	High	Not Found
FALSE	High	Master Protein	P05198	Eukaryotic translation initiation factor 2 subunit 1 OS=Homo sapiens OX=9606 GN=EIF2S1 PE=1 SV=3	0	59.628	45	13	28	13	1	315	36.1	5.08	87.16	13	0	97.2	98.6	98.4	96.2	99.4	107.4	High	High	High	High	High	High	Not Found	High	Not Found
FALSE	High	Master Protein	P99999	Cytochrome c OS=Homo sapiens OX=9606 GN=CYCS PE=1 SV=2	0	59.545	68	9	18	9	1	105	11.7	9.57	70.97	9	0	97.6	94.7	106.6	95.1	101.3	101	Not Found	Not Found	Not Found	Not Found	High	High	High	High	Not Found
FALSE	High	Master Protein	Q14103	Heterogeneous nuclear ribonucleoprotein D0 OS=Homo sapiens OX=9606 GN=HNRNPD PE=1 SV=1	0	59.508	32	12	22	9	1	355	38.4	7.81	69.84	12	3	102.6	98.9	104.6	95.5	100.5	96.5	High	High	Not Found	High	High	High	High	High	High
FALSE	High	Master Protein	Q99536	Synaptic vesicle membrane protein VAT-1 homolog OS=Homo sapiens OX=9606 GN=VAT1 PE=1 SV=2	0	59.232	42	10	17	10	1	393	41.9	6.29	60.14	10	0	100.1	104.5	94.1	101.3	99.4	109.2	Not Found	High	High	High	High	High	High	High	Not Found
FALSE	High	Master Protein	P54727	UV excision repair protein RAD23 homolog B OS=Homo sapiens OX=9606 GN=RAD23B PE=1 SV=1	0	59.21	34	11	25	9	1	409	43.1	4.84	91.89	11	2	97.6	106.3	101.4	105.2	96.7	88.5	Not Found	Not Found	High	High	High	High	High	High	Not Found
FALSE	High	Master Protein	Q9NYF8	Bcl-2-associated transcription factor 1 OS=Homo sapiens OX=9606 GN=BCLAF1 PE=1 SV=2	0	59.178	14	13	19	12	1	920	106.1	9.98	61.41	13	1	103.8	99	104.8	97.5	100	96.7	High	High	High	High	High	High	High	High	Not Found
FALSE	High	Master Protein	Q14554	Protein disulfide-isomerase A5 OS=Homo sapiens OX=9606 GN=PDIA5 PE=1 SV=1	0	59.051	23	10	15	10	1	519	59.6	7.91	49.67	10	0	103.9	100.3	99.7	97.4	102.9	102.9	Not Found	Not Found	High	High	High	High	High	High	Not Found
FALSE	High	Master Protein	B5ME19	Eukaryotic translation initiation factor 3 subunit C-like protein OS=Homo sapiens OX=9606 GN=EIF3CL PE=1 SV=1	0	58.861	18	17	25	17	1	914	105.4	5.64	69.21	17	0	93.9	93.2	96.1	97.1	99.3	120.9	High	High	Not Found	High	High	High	High	High	High
FALSE	High	Master Protein	Q15181	Inorganic pyrophosphatase OS=Homo sapiens OX=9606 GN=PPA1 PE=1 SV=2	0	58.739	52	11	14	10	1	289	32.6	5.86	50.94	11	0	91.8	103.3	97.4	103.6	94.6	90.4	Not Found	Not Found	High	High	High	High	Not Found	High	High
FALSE	High	Master Protein	P16989	Y-box-binding protein 3 OS=Homo sapiens OX=9606 GN=YBX3 PE=1 SV=4	0	58.719	31	9	15	6	1	372	40.1	9.77	50.98	9	0	96.6	93.4	98.8	90.2	100.5	112.1	High	High	High	High	Not Found	High	High	Not Found	Not Found
FALSE	High	Master Protein	Q92804	TATA-binding protein-associated factor 2N OS=Homo sapiens OX=9606 GN=TAF15 PE=1 SV=1	0	58.707	33	11	21	9	1	592	61.8	8.02	64.1	11	2	107.3	100.5	104.3	101.2	94.7	93.5	High	High	High	High	High	High	High	High	Not Found
FALSE	High	Master Protein	P35637	RNA-binding protein FUS OS=Homo sapiens OX=9606 GN=FUS PE=1 SV=1	0	58.642	19	8	19	6	1	526	53.4	9.36	72.27	8	0	97.4	97.2	103.6	98.8	101.5	92.6	Not Found	High	Not Found	High	High	High	Not Found	Not Found	Not Found
FALSE	High	Master Protein	Q9Y6N5	Sulfide:quinone oxidoreductase, mitochondrial OS=Homo sapiens OX=9606 GN=SQOR PE=1 SV=1	0	58.627	33	13	16	13	1	450	49.9	9.11	55.45	13	0	108.2	98	97.3	96.2	110.9	99.5	Not Found	High	Not Found	High	High	High	High	High	Not Found
FALSE	High	Master Protein	Q9H0U4	Ras-related protein Rab-1B OS=Homo sapiens OX=9606 GN=RAB1B PE=1 SV=1	0	58.607	63	10	20	2	1	201	22.2	5.73	69.3	10	0	100.3	107.1	100.3	109.5	98.5	94.8	Not Found	Not Found	Not Found	Not Found	High	High	Not Found	Not Found	Not Found
FALSE	High	Master Protein	P06899	Histone H2B type 1-J OS=Homo sapiens OX=9606 GN=H2BC11 PE=1 SV=3	0	58.545	59	10	54	2	1	126	13.9	10.32	168.6	10	0	99.1	91.4	106.8	92.3	108.1	98.3	Not Found	Not Found	Not Found	Not Found	High	High	High	Not Found	Not Found
FALSE	High	Master Protein	P04181	Ornithine aminotransferase, mitochondrial OS=Homo sapiens OX=9606 GN=OAT PE=1 SV=1	0	58.511	27	10	20	10	1	439	48.5	7.03	68.16	10	0	103.2	92	96.7	98.1	117	106.9	Not Found	Not Found	High	High	High	Not Found	Not Found	High	Not Found
FALSE	High	Master Protein	Q9H2G2	STE20-like serine/threonine-protein kinase OS=Homo sapiens OX=9606 GN=SLK PE=1 SV=1	0	58.462	11	12	16	10	1	1235	142.6	5.15	47.26	12	2	96.1	98.3	97	99.3	99.6	101.4	Not Found	High	High	High	High	High	High	High	Not Found
FALSE	High	Master Protein	P31942	Heterogeneous nuclear ribonucleoprotein H3 OS=Homo sapiens OX=9606 GN=HNRNPH3 PE=1 SV=2	0	58.351	30	8	28	7	1	346	36.9	6.87	81.93	8	0	96.2	100.6	101.7	100.3	97.6	94.9	High	High	High	High	High	High	High	High	Not Found
FALSE	High	Master Protein	O00232	26S proteasome non-ATPase regulatory subunit 12 OS=Homo sapiens OX=9606 GN=PSMD12 PE=1 SV=3	0	58.25	24	10	12	10	1	456	52.9	7.65	45.95	10	0	95.8	103.6	97	96.7	98.6	109.9	Not Found	Not Found	High	High	High	High	Not Found	Not Found	Not Found
FALSE	High	Master Protein	P35611	Alpha-adducin OS=Homo sapiens OX=9606 GN=ADD1 PE=1 SV=2	0	58.215	16	9	11	9	1	737	80.9	5.83	39.52	9	0	100.9	101.7	99.5	97.5	100.6	104.9	Not Found	Not Found	High	High	High	High	Not Found	Not Found	Not Found
FALSE	High	Master Protein	Q9Y2W1	Thyroid hormone receptor-associated protein 3 OS=Homo sapiens OX=9606 GN=THRAP3 PE=1 SV=2	0	58.012	12	10	20	9	1	955	108.6	10.15	65.89	10	0	102.5	98	101.2	94.6	103.1	105.7	High	High	High	High	High	High	High	Not Found	Not Found
FALSE	High	Master Protein	Q08257	Quinone oxidoreductase OS=Homo sapiens OX=9606 GN=CRYZ PE=1 SV=1	0	57.9	39	10	15	10	1	329	35.2	8.44	51.16	10	0	93.5	98.2	102	107.5	97.2	98	Not Found	Not Found	Not Found	High	High	High	High	Not Found	Not Found
FALSE	High	Master Protein	P10301	Ras-related protein R-Ras OS=Homo sapiens OX=9606 GN=RRAS PE=1 SV=1	0	57.863	56	9	16	7	1	218	23.5	6.93	63.61	9	3	103.8	100.9	99.2	101.8	107.3	108.4	Not Found	High	High	Not Found	High	High	High	Not Found	Not Found
FALSE	High	Master Protein	P61026	Ras-related protein Rab-10 OS=Homo sapiens OX=9606 GN=RAB10 PE=1 SV=1	0	57.854	46	10	18	8	1	200	22.5	8.38	62.05	10	0	106.8	100.5	105	101.3	104.4	97.3	High	Not Found	Not Found	High	High	High	High	High	High
FALSE	High	Master Protein	Q9Y2B0	Protein canopy homolog 2 OS=Homo sapiens OX=9606 GN=CNPY2 PE=1 SV=1	0	57.83	63	9	16	9	1	182	20.6	4.92	59.16	9	0	100.5	107	98.5	99.8	97.3	105.8	High	High	High	High	High	High	High	Not Found	Not Found
FALSE	High	Master Protein	P56537	Eukaryotic translation initiation factor 6 OS=Homo sapiens OX=9606 GN=EIF6 PE=1 SV=1	0	57.705	60	9	16	9	1	245	26.6	4.68	59.16	9	0	100.2	104	100.3	95.7	95.4	93.5	Not Found	High	High	High	High	High	High	Not Found	Not Found
FALSE	High	Master Protein	Q13492	Phosphatidylinositol-binding clathrin assembly protein OS=Homo sapiens OX=9606 GN=PICALM PE=1 SV=2	0	57.702	20	11	19	11	1	652	70.7	7.9	60.7	11	0	99.4	101.5	99.3	98.2	101.4	95.1	High	High	Not Found	High	High	High	High	High	High
FALSE	High	Master Protein	Q9UKK3	Protein mono-ADP-ribosyltransferase PARP4 OS=Homo sapiens OX=9606 GN=PARP4 PE=1 SV=3	0	57.698	8	12	13	12	1	1724	192.5	5.66	43.03	12	0	97.5	99.8	95.3	102.1	100.9	103.9	Not Found	High	High	Not Found	High	High	Not Found	High	Not Found
FALSE	High	Master Protein	Q9UGI8	Testin OS=Homo sapiens OX=9606 GN=TES PE=1 SV=1	0	57.572	32	13	14	13	1	421	48	7.68	46.59	13	0	92.1	100.5	93.9	106.4	95.8	92.5	High	High	Not Found	High	High	High	High	High	Not Found
FALSE	High	Master Protein	Q9UIJ7	GTP:AMP phosphotransferase AK3, mitochondrial OS=Homo sapiens OX=9606 GN=AK3 PE=1 SV=4	0	57.472	62	14	28	14	1	227	25.6	9.16	76.86	14	0	102.2	98	101.9	94.7	103.9	110.2	Not Found	Not Found	High	High	High	High	High	High	Not Found
FALSE	High	Master Protein	O75390	Citrate synthase, mitochondrial OS=Homo sapiens OX=9606 GN=CS PE=1 SV=2	0	57.459	28	13	23	13	1	466	51.7	8.32	71.28	13	0	111.6	97.2	100.1	92.2	109.8	102.5	Not Found	Not Found	High	High	High	High	High	High	Not Found
FALSE	High	Master Protein	Q14254	Flotillin-2 OS=Homo sapiens OX=9606 GN=FLOT2 PE=1 SV=2	0	57.422	29	11	11	11	1	428	47	5.25	39.44	11	0	108	104.1	105.2	101.7	105.6	101.9	Not Found	High	High	High	High	Not Found	High	High	Not Found
FALSE	High	Master Protein	P02461	Collagen alpha-1(III) chain OS=Homo sapiens OX=9606 GN=COL3A1 PE=1 SV=4	0	57.362	8	10	12	10	1	1466	138.5	6.61	41.11	10	0	119.6	115.3	120.6	81.1	87.9	92.5	Not Found	High	Not Found	High	High	High	High	Not Found	Not Found
FALSE	High	Master Protein	P61019	Ras-related protein Rab-2A OS=Homo sapiens OX=9606 GN=RAB2A PE=1 SV=1	0	57.347	46	8	10	8	1	212	23.5	6.54	39.59	8	0	105.5	102.2	105.1	99.3	104.5	99.9	Not Found	Not Found	Not Found	High	High	High	High	Not Found	Not Found
FALSE	High	Master Protein	Q9NZI8	Insulin-like growth factor 2 mRNA-binding protein 1 OS=Homo sapiens OX=9606 GN=IGF2BP1 PE=1 SV=2	0	57.321	30	14	21	12	1	577	63.4	9.2	68.39	14	0	96.8	95.1	98.6	96.2	101.3	112.8	Not Found	High	High	High	High	High	High	High	Not Found
FALSE	High	Master Protein	P54920	Alpha-soluble NSF attachment protein OS=Homo sapiens OX=9606 GN=NAPA PE=1 SV=3	0	57.17	41	10	15	10	1	295	33.2	5.36	50.55	10	0	97.8	94.2	98.8	95.6	101.6	114.6	High	High	High	High	High	High	High	Not Found	High
FALSE	High	Master Protein	P02533	Keratin, type I cytoskeletal 14 OS=Homo sapiens OX=9606 GN=KRT14 PE=1 SV=4	0	57.083	28	13	22	3	1	472	51.5	5.16	59.05	13	3	94.8	101.9	110.4	99	152.5	86.1	Not Found	High	Not Found	High	Not Found	Not Found	Not Found	Not Found	Not Found
FALSE	High	Master Protein	O43776	Asparagine--tRNA ligase, cytoplasmic OS=Homo sapiens OX=9606 GN=NARS1 PE=1 SV=1	0	57.039	25	11	20	11	1	548	62.9	6.25	58.56	11	0	91	97.6	93.2	97.9	96	116.5	Not Found	Not Found	High	High	High	High	High	High	Not Found
FALSE	High	Master Protein	Q03001	Dystonin OS=Homo sapiens OX=9606 GN=DST PE=1 SV=4	0	57.018	2	17	17	16	1	7570	860.1	5.25	40.96	17	0	99.5	97.1	99.2	98.6	102.3	105.5	Not Found	High	High	High	High	High	High	High	Not Found
FALSE	High	Master Protein	P62829	60S ribosomal protein L23 OS=Homo sapiens OX=9606 GN=RPL23 PE=1 SV=1	0	56.808	62	7	29	7	1	140	14.9	10.51	91.42	7	0	99.1	102.1	101.1	100.6	98.6	98.5	Not Found	Not Found	High	High	High	High	High	High	Not Found
FALSE	High	Master Protein	Q12904	Aminoacyl tRNA synthase complex-interacting multifunctional protein 1 OS=Homo sapiens OX=9606 GN=AIMP1 PE=1 SV=2	0	56.253	41	9	13	9	1	312	34.3	8.43	38.64	9	0	97.6	98.3	99.6	99.9	97.7	96.6	Not Found	Not Found	Not Found	High	High	High	High	High	Not Found
FALSE	High	Master Protein	Q08J23	RNA cytosine C(5)-methyltransferase NSUN2 OS=Homo sapiens OX=9606 GN=NSUN2 PE=1 SV=2	0	56.244	21	11	13	11	1	767	86.4	6.77	45.49	11	0	100	106.6	100.5	98.6	95.7	99.1	Not Found	High	High	High	High	High	Not Found	High	Not Found
FALSE	High	Master Protein	Q01469	Fatty acid-binding protein 5 OS=Homo sapiens OX=9606 GN=FABP5 PE=1 SV=3	0	56.113	59	7	9	7	1	135	15.2	7.01	36.64	7	0	93.7	106.4	100.3	107	93.8	75.4	High	Not Found	Not Found	Not Found	High	High	High	Not Found	Not Found
FALSE	High	Master Protein	P61586	Transforming protein RhoA OS=Homo sapiens OX=9606 GN=RHOA PE=1 SV=1	0	55.964	51	8	24	4	1	193	21.8	6.1	81.86	8	5	98.8	102.3	94.7	106.4	103.4	102.3	Not Found	Not Found	High	Not Found	High	High	High	Not Found	Not Found
FALSE	High	Master Protein	O00499	Myc box-dependent-interacting protein 1 OS=Homo sapiens OX=9606 GN=BIN1 PE=1 SV=1	0	55.939	23	10	13	10	1	593	64.7	5.06	47.69	10	0	90.6	95.8	94.3	100.2	95.9	117.5	Not Found	Not Found	High	High	High	High	High	High	Not Found
FALSE	High	Master Protein	P12429	Annexin A3 OS=Homo sapiens OX=9606 GN=ANXA3 PE=1 SV=3	0	55.803	32	9	11	9	1	323	36.4	5.92	42.64	9	0	90.8	97.4	95.8	106	96.9	93.1	Not Found	High	High	High	High	High	Not Found	Not Found	Not Found
FALSE	High	Master Protein	Q71RC2	La-related protein 4 OS=Homo sapiens OX=9606 GN=LARP4 PE=1 SV=3	0	55.771	21	12	13	12	1	724	80.5	6.61	43.55	12	0	97.7	97.6	100.3	93.6	97.5	110.2	Not Found	High	High	High	High	High	Not Found	High	Not Found
FALSE	High	Master Protein	Q06323	Proteasome activator complex subunit 1 OS=Homo sapiens OX=9606 GN=PSME1 PE=1 SV=1	0	55.649	42	9	10	9	1	249	28.7	6.02	42.5	9	0	99.1	105.3	97.7	108.6	90.2	85.4	Not Found	High	Not Found	High	High	High	High	Not Found	Not Found
FALSE	High	Master Protein	P40261	Nicotinamide N-methyltransferase OS=Homo sapiens OX=9606 GN=NNMT PE=1 SV=1	0	55.53	35	9	22	9	1	264	29.6	5.74	76.35	9	0	88.1	100.6	92.9	107.8	100.3	90.7	Not Found	Not Found	High	High	High	High	High	High	Not Found
FALSE	High	Master Protein	Q9BXS5	AP-1 complex subunit mu-1 OS=Homo sapiens OX=9606 GN=AP1M1 PE=1 SV=3	0	55.526	35	12	12	12	1	423	48.6	7.3	41.82	12	0	97	97.9	100	101	100.8	102.8	Not Found	Not Found	High	High	High	High	High	High	High
FALSE	High	Master Protein	P53992	Protein transport protein Sec24C OS=Homo sapiens OX=9606 GN=SEC24C PE=1 SV=3	0	55.514	13	11	20	11	1	1094	118.2	7.06	58.35	11	0	97.4	97.8	96.4	101.5	105.9	105.6	High	High	High	Not Found	High	High	High	High	High
FALSE	High	Master Protein	P61106	Ras-related protein Rab-14 OS=Homo sapiens OX=9606 GN=RAB14 PE=1 SV=4	0	55.478	56	9	14	8	1	215	23.9	6.21	54.61	9	0	102.9	94.9	100.1	102.5	106.9	100.6	High	High	High	High	High	High	High	Not Found	Not Found
FALSE	High	Master Protein	P46783	40S ribosomal protein S10 OS=Homo sapiens OX=9606 GN=RPS10 PE=1 SV=1	0	55.346	53	11	37	10	1	165	18.9	10.15	109.96	11	0	95.8	96.8	96.4	98.9	99.2	118.5	Not Found	High	High	High	High	High	High	High	High
FALSE	High	Master Protein	Q15424	Scaffold attachment factor B1 OS=Homo sapiens OX=9606 GN=SAFB PE=1 SV=4	0	55.328	16	11	14	8	1	915	102.6	5.47	47.97	11	3	100.4	96.7	103.9	99.1	98.9	98.8	High	Not Found	High	High	Not Found	Not Found	High	High	Not Found
FALSE	High	Master Protein	P11217	Glycogen phosphorylase, muscle form OS=Homo sapiens OX=9606 GN=PYGM PE=1 SV=6	0	55.326	15	11	23	1	1	842	97	7.03	64.22	11	0	93	97	86.8	100.9	113.8	100.7	Not Found	Not Found	Not Found	Not Found	Not Found	High	Not Found	Not Found	Not Found
FALSE	High	Master Protein	Q9UPQ0	LIM and calponin homology domains-containing protein 1 OS=Homo sapiens OX=9606 GN=LIMCH1 PE=1 SV=4	0	55.303	12	10	10	10	1	1083	121.8	6.47	34.44	10	0	100.3	100.6	95.6	103.6	107.2	101.7	Not Found	High	High	High	High	High	High	Not Found	Not Found
FALSE	High	Master Protein	P61224	Ras-related protein Rap-1b OS=Homo sapiens OX=9606 GN=RAP1B PE=1 SV=1	0	55.234	59	10	17	5	1	184	20.8	5.78	59.78	10	5	106.5	101.1	95.2	98.7	105.4	111.9	Not Found	Not Found	Not Found	High	High	High	High	High	Not Found
FALSE	High	Master Protein	Q93008	Probable ubiquitin carboxyl-terminal hydrolase FAF-X OS=Homo sapiens OX=9606 GN=USP9X PE=1 SV=4	0	55.226	6	17	24	17	1	2554	290.3	5.8	63	17	0	94.4	100	94	98.6	98.9	113	Not Found	High	High	High	High	High	High	High	High
FALSE	High	Master Protein	O00154	Cytosolic acyl coenzyme A thioester hydrolase OS=Homo sapiens OX=9606 GN=ACOT7 PE=1 SV=3	0	55.223	36	11	15	11	1	380	41.8	8.54	46.49	11	0	91.2	98.7	94.4	100.9	99.2	112.9	High	High	High	High	High	High	High	High	Not Found
FALSE	High	Master Protein	Q9Y383	Putative RNA-binding protein Luc7-like 2 OS=Homo sapiens OX=9606 GN=LUC7L2 PE=1 SV=2	0	55.181	34	13	17	8	1	392	46.5	10.01	50.05	13	5	99.1	98.9	100.2	100.1	99.7	99.5	High	High	High	Not Found	High	Not Found	Not Found	High	High
FALSE	High	Master Protein	Q13217	DnaJ homolog subfamily C member 3 OS=Homo sapiens OX=9606 GN=DNAJC3 PE=1 SV=1	0	55.152	30	13	14	13	1	504	57.5	6.15	44.94	13	0	105.7	100.5	103.3	98	100.7	92.4	High	High	High	High	High	High	High	High	Not Found
FALSE	High	Master Protein	Q7Z406	Myosin-14 OS=Homo sapiens OX=9606 GN=MYH14 PE=1 SV=2	0	55.138	5	10	30	1	1	1995	227.7	5.6	107.11	10	0	88.5	93	76.6	78	103.5	115.9	Not Found	Not Found	Not Found	High	High	High	Not Found	Not Found	Not Found
FALSE	High	Master Protein	P05387	60S acidic ribosomal protein P2 OS=Homo sapiens OX=9606 GN=RPLP2 PE=1 SV=1	0	55.015	49	7	16	7	1	115	11.7	4.54	59.28	7	0	107.7	104.9	105.6	92.6	103.1	93.7	High	Not Found	High	High	High	High	High	High	Not Found
FALSE	High	Master Protein	P62491	Ras-related protein Rab-11A OS=Homo sapiens OX=9606 GN=RAB11A PE=1 SV=3	0	54.901	49	9	18	9	1	216	24.4	6.57	57.01	9	0	103.4	102.8	97.8	98.3	96.1	103.2	High	High	High	High	High	High	High	Not Found	Not Found
FALSE	High	Master Protein	P62910	60S ribosomal protein L32 OS=Homo sapiens OX=9606 GN=RPL32 PE=1 SV=2	0	54.79	39	6	33	6	1	135	15.9	11.33	95.65	6	0	93.7	95.2	100.9	108	103	100.9	Not Found	Not Found	Not Found	Not Found	High	High	High	High	Not Found
FALSE	High	Master Protein	P21399	Cytoplasmic aconitate hydratase OS=Homo sapiens OX=9606 GN=ACO1 PE=1 SV=3	0	54.762	20	15	16	15	1	889	98.3	6.68	48.68	15	0	89.6	95.1	91.7	107	105.3	112.8	Not Found	High	High	High	High	High	High	High	Not Found
FALSE	High	Master Protein	Q12905	Interleukin enhancer-binding factor 2 OS=Homo sapiens OX=9606 GN=ILF2 PE=1 SV=2	0	54.759	35	10	13	10	1	390	43	5.26	53.57	10	0	100.7	99.7	103.4	98.5	102.5	94.5	Not Found	Not Found	Not Found	Not Found	High	High	Not Found	High	Not Found
FALSE	High	Master Protein	Q10471	Polypeptide N-acetylgalactosaminyltransferase 2 OS=Homo sapiens OX=9606 GN=GALNT2 PE=1 SV=1	0	54.663	24	14	25	13	1	571	64.7	8.35	71.02	14	1	111.9	105.9	110	97.5	101.9	94	Not Found	High	High	High	High	High	High	High	Not Found
FALSE	High	Master Protein	P28070	Proteasome subunit beta type-4 OS=Homo sapiens OX=9606 GN=PSMB4 PE=1 SV=4	0	54.591	48	8	12	8	1	264	29.2	5.97	39.91	8	0	95.5	96.2	98.2	102	98.3	104.1	Not Found	Not Found	Not Found	High	High	High	High	High	Not Found
FALSE	High	Master Protein	O95831	Apoptosis-inducing factor 1, mitochondrial OS=Homo sapiens OX=9606 GN=AIFM1 PE=1 SV=1	0	54.491	20	10	12	10	1	613	66.9	8.95	44.61	10	0	98.1	100.4	100.4	95.9	98.6	115	High	High	High	High	High	High	High	High	Not Found
FALSE	High	Master Protein	P30533	Alpha-2-macroglobulin receptor-associated protein OS=Homo sapiens OX=9606 GN=LRPAP1 PE=1 SV=1	0	54.462	33	12	15	12	1	357	41.4	8.78	47.19	12	0	100.9	98.2	101.1	104.9	102.9	93.4	High	High	High	High	High	High	High	Not Found	High
FALSE	High	Master Protein	O43175	D-3-phosphoglycerate dehydrogenase OS=Homo sapiens OX=9606 GN=PHGDH PE=1 SV=4	0	54.405	22	9	11	9	1	533	56.6	6.71	42.09	9	0	94.4	101.4	96.8	99	97.6	100.7	Not Found	Not Found	High	High	High	High	High	Not Found	Not Found
FALSE	High	Master Protein	Q99729	Heterogeneous nuclear ribonucleoprotein A/B OS=Homo sapiens OX=9606 GN=HNRNPAB PE=1 SV=2	0	54.333	23	8	18	6	1	332	36.2	8.21	60.17	8	0	105.1	97.3	105	99.6	94.9	93.8	Not Found	High	High	High	High	Not Found	High	High	Not Found
FALSE	High	Master Protein	P30086	Phosphatidylethanolamine-binding protein 1 OS=Homo sapiens OX=9606 GN=PEBP1 PE=1 SV=3	0	54.193	56	8	17	8	1	187	21	7.53	61	8	0	89.1	99.1	96.3	106.6	96.6	97.7	Not Found	High	Not Found	High	High	High	High	High	Not Found
FALSE	High	Master Protein	Q07666	KH domain-containing, RNA-binding, signal transduction-associated protein 1 OS=Homo sapiens OX=9606 GN=KHDRBS1 PE=1 SV=1	0	53.879	20	9	24	8	1	443	48.2	8.66	87.97	9	1	99.2	98.4	103.1	99.4	100.9	101.1	Not Found	High	High	High	High	High	High	High	Not Found
FALSE	High	Master Protein	P08708	40S ribosomal protein S17 OS=Homo sapiens OX=9606 GN=RPS17 PE=1 SV=2	0	53.875	56	7	14	7	1	135	15.5	9.85	53.37	7	0	101	101.3	102.6	96.9	100.9	94.2	Not Found	High	High	Not Found	High	High	High	High	Not Found
FALSE	High	Master Protein	Q13439	Golgin subfamily A member 4 OS=Homo sapiens OX=9606 GN=GOLGA4 PE=1 SV=1	0	53.624	6	12	14	11	1	2230	261	5.39	45.47	12	0	99.4	100.5	98.3	97.5	102.5	102.4	High	Not Found	High	High	High	High	Not Found	Not Found	Not Found
FALSE	High	Master Protein	O00303	Eukaryotic translation initiation factor 3 subunit F OS=Homo sapiens OX=9606 GN=EIF3F PE=1 SV=1	0	53.59	31	10	16	10	1	357	37.5	5.45	46.35	10	0	93.2	100.6	98.7	105.2	96.9	92.8	Not Found	High	High	Not Found	High	High	High	High	Not Found
FALSE	High	Master Protein	Q13838	Spliceosome RNA helicase DDX39B OS=Homo sapiens OX=9606 GN=DDX39B PE=1 SV=1	0	53.585	31	13	19	13	1	428	49	5.67	61.2	13	0	104.1	97.3	102.3	95.8	104.6	99.9	Not Found	High	High	High	High	High	High	High	Not Found
FALSE	High	Master Protein	Q9Y285	Phenylalanine--tRNA ligase alpha subunit OS=Homo sapiens OX=9606 GN=FARSA PE=1 SV=3	0	53.571	21	9	19	9	1	508	57.5	7.8	61.66	9	0	97.9	97.2	98.9	94.6	101.3	106.5	High	High	Not Found	High	High	Not Found	High	Not Found	Not Found
FALSE	High	Master Protein	P16402	Histone H1.3 OS=Homo sapiens OX=9606 GN=H1-3 PE=1 SV=2	0	53.516	26	8	21	2	1	221	22.3	11.02	69.9	8	6	102.8	93	102.6	94.3	95.8	109.5	Not Found	Not Found	Not Found	Not Found	Not Found	High	Not Found	High	Not Found
FALSE	High	Master Protein	P62826	GTP-binding nuclear protein Ran OS=Homo sapiens OX=9606 GN=RAN PE=1 SV=3	0	53.465	40	7	27	7	1	216	24.4	7.49	89.2	7	0	95	106	96.5	108.9	96.3	83.2	Not Found	Not Found	Not Found	High	High	High	High	Not Found	Not Found
FALSE	High	Master Protein	P11233	Ras-related protein Ral-A OS=Homo sapiens OX=9606 GN=RALA PE=1 SV=1	0	53.308	50	7	14	4	1	206	23.6	7.11	44.83	7	4	104.2	102.7	101.2	106.1	99.6	98.7	Not Found	Not Found	High	Not Found	High	High	Not Found	High	Not Found
FALSE	High	Master Protein	P55036	26S proteasome non-ATPase regulatory subunit 4 OS=Homo sapiens OX=9606 GN=PSMD4 PE=1 SV=1	0	53.301	30	9	18	9	1	377	40.7	4.79	55.5	9	0	96.4	103.4	98.6	102.3	97.4	99.5	Not Found	Not Found	High	High	High	High	High	High	Not Found
FALSE	High	Master Protein	Q9UBT2	SUMO-activating enzyme subunit 2 OS=Homo sapiens OX=9606 GN=UBA2 PE=1 SV=2	0	53.11	28	13	15	13	1	640	71.2	5.29	45.33	13	0	99.5	101.5	98.4	100.9	100.9	100.3	High	Not Found	High	High	Not Found	High	High	Not Found	Not Found
FALSE	High	Master Protein	Q9UDY4	DnaJ homolog subfamily B member 4 OS=Homo sapiens OX=9606 GN=DNAJB4 PE=1 SV=1	0	53.069	34	9	15	8	1	337	37.8	8.5	60.92	9	1	95.8	104.1	98.2	98.3	93.9	93.5	Not Found	Not Found	High	High	High	High	Not Found	High	Not Found
FALSE	High	Master Protein	P40222	Alpha-taxilin OS=Homo sapiens OX=9606 GN=TXLNA PE=1 SV=3	0	53.033	26	12	16	12	1	546	61.9	6.52	54.51	12	0	98.3	98.5	98.2	96	97.8	105.3	High	High	High	High	High	High	Not Found	Not Found	Not Found
FALSE	High	Master Protein	Q01105	Protein SET OS=Homo sapiens OX=9606 GN=SET PE=1 SV=3	0	53.027	30	6	11	6	1	290	33.5	4.32	46.4	6	0	108	111.4	104.3	97.2	97.4	81.7	Not Found	High	High	High	High	High	High	Not Found	Not Found
FALSE	High	Master Protein	Q9BS26	Endoplasmic reticulum resident protein 44 OS=Homo sapiens OX=9606 GN=ERP44 PE=1 SV=1	0	53.012	27	11	16	10	1	406	46.9	5.26	47.87	11	1	97	93.3	102.9	101.4	103.9	107.9	High	High	High	Not Found	High	High	High	High	High
FALSE	High	Master Protein	Q9UM54	Unconventional myosin-VI OS=Homo sapiens OX=9606 GN=MYO6 PE=1 SV=4	0	52.938	8	8	11	8	1	1294	149.6	8.53	39.07	8	0	102.3	98.6	99	97.3	100.7	107.8	Not Found	High	Not Found	High	High	Not Found	High	High	Not Found
FALSE	High	Master Protein	Q14258	E3 ubiquitin/ISG15 ligase TRIM25 OS=Homo sapiens OX=9606 GN=TRIM25 PE=1 SV=2	0	52.933	20	10	14	10	1	630	70.9	8.09	52.35	10	0	95.1	99.3	96.4	99.9	97	104.7	Not Found	Not Found	High	High	High	High	High	High	Not Found
FALSE	High	Master Protein	Q16543	Hsp90 co-chaperone Cdc37 OS=Homo sapiens OX=9606 GN=CDC37 PE=1 SV=1	0	52.923	29	9	17	9	1	378	44.4	5.25	53.2	9	0	96.6	106.2	100.4	107.7	95.2	80.9	High	High	High	High	High	High	High	Not Found	Not Found
FALSE	High	Master Protein	Q9P0L0	Vesicle-associated membrane protein-associated protein A OS=Homo sapiens OX=9606 GN=VAPA PE=1 SV=3	0	52.867	39	9	13	8	1	249	27.9	8.62	50.03	9	1	113.1	98.1	111.1	99.9	106.1	92.9	Not Found	Not Found	Not Found	High	High	High	High	High	Not Found
FALSE	High	Master Protein	P54819	Adenylate kinase 2, mitochondrial OS=Homo sapiens OX=9606 GN=AK2 PE=1 SV=2	0	52.791	40	8	22	8	1	239	26.5	7.81	70.66	8	0	101	100.1	102	97.6	102	105.5	Not Found	Not Found	High	High	High	High	High	High	Not Found
FALSE	High	Master Protein	P62070	Ras-related protein R-Ras2 OS=Homo sapiens OX=9606 GN=RRAS2 PE=1 SV=1	0	52.767	41	8	15	6	1	204	23.4	6.01	53.63	8	0	105.4	99	101.6	97	107.5	111.5	Not Found	High	High	High	High	High	Not Found	Not Found	Not Found
FALSE	High	Master Protein	P29590	Protein PML OS=Homo sapiens OX=9606 GN=PML PE=1 SV=3	0	52.729	17	15	18	15	1	882	97.5	6.21	53.05	15	0	101.9	96	99.8	96.5	102.5	106.2	High	High	High	High	High	High	High	High	Not Found
FALSE	High	Master Protein	Q8N556	Actin filament-associated protein 1 OS=Homo sapiens OX=9606 GN=AFAP1 PE=1 SV=2	0	52.674	13	10	13	10	1	730	80.7	8.68	44.45	10	0	101.5	98.9	99.9	100.5	99.7	96.7	Not Found	Not Found	High	High	High	High	High	High	Not Found
FALSE	High	Master Protein	Q9UG63	ATP-binding cassette sub-family F member 2 OS=Homo sapiens OX=9606 GN=ABCF2 PE=1 SV=2	0	52.42	20	11	14	11	1	623	71.2	7.37	36.4	11	0	99.6	100.7	96.3	92.9	97.7	106	Not Found	Not Found	High	High	High	Not Found	High	High	Not Found
FALSE	High	Master Protein	P11137	Microtubule-associated protein 2 OS=Homo sapiens OX=9606 GN=MAP2 PE=1 SV=4	0	52.342	9	13	15	13	1	1827	199.4	4.91	49.73	13	0	95.8	101.6	94.5	102.5	97.8	101.4	Not Found	High	High	High	High	High	High	High	Not Found
FALSE	High	Master Protein	Q15691	Microtubule-associated protein RP/EB family member 1 OS=Homo sapiens OX=9606 GN=MAPRE1 PE=1 SV=3	0	52.273	59	12	17	11	1	268	30	5.14	61.29	12	1	95	100.6	96.1	100.4	94.4	99	High	High	High	High	High	High	High	High	Not Found
FALSE	High	Master Protein	P32322	Pyrroline-5-carboxylate reductase 1, mitochondrial OS=Homo sapiens OX=9606 GN=PYCR1 PE=1 SV=2	0	52.264	27	6	10	5	1	319	33.3	7.61	45.71	6	0	103.4	97.9	99	98.1	103.7	105.4	Not Found	High	Not Found	High	Not Found	High	High	High	Not Found
FALSE	High	Master Protein	P61204	ADP-ribosylation factor 3 OS=Homo sapiens OX=9606 GN=ARF3 PE=1 SV=2	0	52.053	54	7	10	3	1	181	20.6	7.43	36.95	7	0	101.5	98.1	88.9	97.3	104	117.9	Not Found	High	High	High	Not Found	High	Not Found	Not Found	Not Found
FALSE	High	Master Protein	Q8N766	ER membrane protein complex subunit 1 OS=Homo sapiens OX=9606 GN=EMC1 PE=1 SV=1	0	51.93	15	11	16	11	1	993	111.7	7.66	55.39	11	0	100.9	99.1	93.3	99.8	105.2	107.8	Not Found	High	High	Not Found	High	High	High	High	Not Found
FALSE	High	Master Protein	P27708	CAD protein OS=Homo sapiens OX=9606 GN=CAD PE=1 SV=3	0	51.885	7	10	12	10	1	2225	242.8	6.46	39.24	10	0	98.2	97.5	95.5	98.5	99.2	102.7	High	High	High	Not Found	High	Not Found	High	High	Not Found
FALSE	High	Master Protein	Q9NQC3	Reticulon-4 OS=Homo sapiens OX=9606 GN=RTN4 PE=1 SV=2	0	51.882	8	7	53	7	1	1192	129.9	4.5	189.99	7	0	104.5	97.6	102.5	96.5	100.2	116	Not Found	High	High	High	High	High	High	High	Not Found
FALSE	High	Master Protein	P00533	Epidermal growth factor receptor OS=Homo sapiens OX=9606 GN=EGFR PE=1 SV=2	0	51.799	10	9	11	9	1	1210	134.2	6.68	38.24	9	0	103.7	97.7	100.5	99.7	102.9	105.7	Not Found	High	High	High	High	High	High	High	Not Found
FALSE	High	Master Protein	O00203	AP-3 complex subunit beta-1 OS=Homo sapiens OX=9606 GN=AP3B1 PE=1 SV=3	0	51.787	13	15	19	14	1	1094	121.2	6.04	50.61	15	1	96.9	101.4	98.5	100	97.8	100.9	Not Found	High	High	High	High	High	High	High	Not Found
FALSE	High	Master Protein	Q9GZV4	Eukaryotic translation initiation factor 5A-2 OS=Homo sapiens OX=9606 GN=EIF5A2 PE=1 SV=3	0	51.786	38	7	28	1	1	153	16.8	5.58	92.81	7	0	94.6	109.8	95.6	111.4	88.6	78.5	Not Found	Not Found	Not Found	High	Not Found	Not Found	Not Found	Not Found	Not Found
FALSE	High	Master Protein	Q9NR45	Sialic acid synthase OS=Homo sapiens OX=9606 GN=NANS PE=1 SV=2	0	51.785	28	7	12	7	1	359	40.3	6.74	47.1	7	0	90.1	100.2	92.4	107.7	93.4	113.2	Not Found	High	High	High	High	High	High	Not Found	Not Found
FALSE	High	Master Protein	Q12805	EGF-containing fibulin-like extracellular matrix protein 1 OS=Homo sapiens OX=9606 GN=EFEMP1 PE=1 SV=2	0	51.71	22	8	15	8	1	493	54.6	5.07	52.62	8	0	99	98.1	99.4	98	102.7	119.7	High	High	High	High	Not Found	High	High	Not Found	Not Found
FALSE	High	Master Protein	P62888	60S ribosomal protein L30 OS=Homo sapiens OX=9606 GN=RPL30 PE=1 SV=2	0	51.588	67	8	23	8	1	115	12.8	9.63	80.58	8	0	101.5	99.3	106.1	102	98.9	85.7	Not Found	Not Found	High	High	High	High	High	High	Not Found
FALSE	High	Master Protein	Q9UNF0	Protein kinase C and casein kinase substrate in neurons protein 2 OS=Homo sapiens OX=9606 GN=PACSIN2 PE=1 SV=2	0	51.5	24	12	18	12	1	486	55.7	5.2	45.15	12	0	95.9	97.8	97.8	100.3	95.3	102.9	High	High	High	High	High	High	Not Found	High	High
FALSE	High	Master Protein	P22102	Trifunctional purine biosynthetic protein adenosine-3 OS=Homo sapiens OX=9606 GN=GART PE=1 SV=1	0	51.436	16	15	18	15	1	1010	107.7	6.7	53.4	15	0	93.3	96.2	95.3	99.3	100.3	107.5	Not Found	High	Not Found	High	High	High	High	High	Not Found
FALSE	High	Master Protein	P06737	Glycogen phosphorylase, liver form OS=Homo sapiens OX=9606 GN=PYGL PE=1 SV=4	0	51.32	14	12	22	6	1	847	97.1	7.17	60.33	12	0	94.1	105.6	96.9	106.4	98.2	97.1	Not Found	Not Found	Not Found	Not Found	High	High	High	Not Found	Not Found
FALSE	High	Master Protein	Q02750	Dual specificity mitogen-activated protein kinase kinase 1 OS=Homo sapiens OX=9606 GN=MAP2K1 PE=1 SV=2	0	51.303	26	9	16	5	1	393	43.4	6.62	47.41	9	4	91.6	104.6	96.2	114.9	92.3	87.9	Not Found	Not Found	High	High	Not Found	High	Not Found	High	Not Found
FALSE	High	Master Protein	Q15811	Intersectin-1 OS=Homo sapiens OX=9606 GN=ITSN1 PE=1 SV=3	0	51.296	7	12	14	11	1	1721	195.3	7.77	45.13	12	1	95.4	104.8	96.4	102.7	98.3	97.8	Not Found	High	High	Not Found	High	High	Not Found	High	Not Found
FALSE	High	Master Protein	Q96I99	Succinate--CoA ligase [GDP-forming] subunit beta, mitochondrial OS=Homo sapiens OX=9606 GN=SUCLG2 PE=1 SV=2	0	51.291	28	12	19	12	1	432	46.5	6.39	58.7	12	0	104.4	95	100.6	93.7	110.7	107.7	High	Not Found	Not Found	High	High	High	High	High	Not Found
FALSE	High	Master Protein	Q9BT78	COP9 signalosome complex subunit 4 OS=Homo sapiens OX=9606 GN=COPS4 PE=1 SV=1	0	51.241	31	9	12	9	1	406	46.2	5.83	41.65	9	0	96.2	98.3	95.9	97.9	101.5	115.5	Not Found	High	High	High	High	High	High	Not Found	Not Found
FALSE	High	Master Protein	Q6YN16	Hydroxysteroid dehydrogenase-like protein 2 OS=Homo sapiens OX=9606 GN=HSDL2 PE=1 SV=1	0	51.228	33	12	15	12	1	418	45.4	7.99	40.85	12	0	98.1	93.8	97.8	97.4	110.2	117	Not Found	Not Found	High	High	High	High	High	High	Not Found
FALSE	High	Master Protein	Q93052	Lipoma-preferred partner OS=Homo sapiens OX=9606 GN=LPP PE=1 SV=1	0	51.175	24	9	10	9	1	612	65.7	7.37	38.89	9	0	91.8	99.6	95.4	100.9	98.9	111.5	Not Found	Not Found	High	High	High	High	High	High	Not Found
FALSE	High	Master Protein	Q5T4S7	E3 ubiquitin-protein ligase UBR4 OS=Homo sapiens OX=9606 GN=UBR4 PE=1 SV=1	0	51.163	3	11	14	11	1	5183	573.5	6.04	42.69	11	0	94.7	101.3	98.6	108.5	100.1	103.8	High	Not Found	High	Not Found	High	High	High	High	Not Found
FALSE	High	Master Protein	P55265	Double-stranded RNA-specific adenosine deaminase OS=Homo sapiens OX=9606 GN=ADAR PE=1 SV=4	0	51.141	12	13	16	13	1	1226	136	8.65	48.21	13	0	99.1	99	94.9	100.8	100.3	108.7	Not Found	High	High	High	Not Found	High	High	High	Not Found
FALSE	High	Master Protein	P30044	Peroxiredoxin-5, mitochondrial OS=Homo sapiens OX=9606 GN=PRDX5 PE=1 SV=4	0	50.937	48	7	12	7	1	214	22.1	8.7	44.83	7	0	103.9	103	105.5	98.9	102.2	87.8	Not Found	Not Found	Not Found	High	High	High	High	High	Not Found
FALSE	High	Master Protein	Q12874	Splicing factor 3A subunit 3 OS=Homo sapiens OX=9606 GN=SF3A3 PE=1 SV=1	0	50.912	22	12	13	12	1	501	58.8	5.38	43.5	12	0	100.3	97.6	105.9	97.9	102.9	92	High	Not Found	High	High	High	High	High	High	Not Found
FALSE	High	Master Protein	P16403	Histone H1.2 OS=Homo sapiens OX=9606 GN=H1-2 PE=1 SV=2	0	50.844	27	7	20	1	1	213	21.4	10.93	67.21	7	0	96.9	100.2	89.7	104.3	82.9	140.7	Not Found	Not Found	Not Found	Not Found	Not Found	Not Found	Not Found	High	Not Found
FALSE	High	Master Protein	Q07021	Complement component 1 Q subcomponent-binding protein, mitochondrial OS=Homo sapiens OX=9606 GN=C1QBP PE=1 SV=1	0	50.617	32	6	15	6	1	282	31.3	4.84	66.45	6	0	106.8	106.2	106	97.1	96.5	97.5	Not Found	Not Found	High	High	High	High	Not Found	Not Found	Not Found
FALSE	High	Master Protein	P55010	Eukaryotic translation initiation factor 5 OS=Homo sapiens OX=9606 GN=EIF5 PE=1 SV=2	0	50.61	26	10	19	10	1	431	49.2	5.58	52.84	10	0	95.4	96.4	97	98.5	100.9	104	High	High	High	High	High	High	High	High	Not Found
FALSE	High	Master Protein	O60271	C-Jun-amino-terminal kinase-interacting protein 4 OS=Homo sapiens OX=9606 GN=SPAG9 PE=1 SV=4	0	50.574	7	7	9	7	1	1321	146.1	5.15	35.93	7	0	93.9	103.7	94	104.2	93	96.7	Not Found	High	Not Found	High	Not Found	High	High	High	Not Found
FALSE	High	Master Protein	O95479	GDH/6PGL endoplasmic bifunctional protein OS=Homo sapiens OX=9606 GN=H6PD PE=1 SV=2	0	50.548	13	9	10	9	1	791	88.8	7.3	35.4	9	0	100	98.4	100.3	91.7	109.8	116.3	Not Found	High	High	High	Not Found	High	Not Found	Not Found	Not Found
FALSE	High	Master Protein	O15355	Protein phosphatase 1G OS=Homo sapiens OX=9606 GN=PPM1G PE=1 SV=1	0	50.471	27	11	11	11	1	546	59.2	4.36	37.91	11	0	98.1	97.1	98.4	94.1	100.7	111.5	High	High	High	High	High	High	Not Found	Not Found	High
FALSE	High	Master Protein	P52789	Hexokinase-2 OS=Homo sapiens OX=9606 GN=HK2 PE=1 SV=2	0	50.467	15	12	14	9	1	917	102.3	6.05	42.24	12	0	95.1	92.8	92.4	103.7	104.8	117.4	High	Not Found	High	High	High	Not Found	High	Not Found	Not Found
FALSE	High	Master Protein	P20618	Proteasome subunit beta type-1 OS=Homo sapiens OX=9606 GN=PSMB1 PE=1 SV=2	0	50.436	39	8	19	8	1	241	26.5	8.13	68.7	8	0	92.4	99.4	94.7	103.7	100.8	106.8	High	High	High	High	High	High	High	High	Not Found
FALSE	High	Master Protein	O75821	Eukaryotic translation initiation factor 3 subunit G OS=Homo sapiens OX=9606 GN=EIF3G PE=1 SV=2	0	50.351	31	10	17	10	1	320	35.6	6.13	48.31	10	0	95.3	102.2	100.7	101.8	97.5	92.8	High	High	High	High	High	Not Found	High	Not Found	High
FALSE	High	Master Protein	O60313	Dynamin-like 120 kDa protein, mitochondrial OS=Homo sapiens OX=9606 GN=OPA1 PE=1 SV=3	0	50.316	14	12	13	12	1	960	111.6	7.87	43.38	12	0	99.9	100.1	96.5	94.9	105.4	109.8	Not Found	High	High	High	High	High	High	High	Not Found
FALSE	High	Master Protein	P25788	Proteasome subunit alpha type-3 OS=Homo sapiens OX=9606 GN=PSMA3 PE=1 SV=2	0	50.277	33	10	22	10	1	255	28.4	5.33	67.3	10	0	96.6	101	98.6	100.3	98.2	105.7	High	High	Not Found	High	High	High	High	Not Found	Not Found
FALSE	High	Master Protein	O75718	Cartilage-associated protein OS=Homo sapiens OX=9606 GN=CRTAP PE=1 SV=1	0	50.227	35	13	21	13	1	401	46.5	5.73	53.01	13	0	101.8	93.4	100	88.8	104.3	119.6	Not Found	High	High	High	High	High	High	High	Not Found
FALSE	High	Master Protein	P13611	Versican core protein OS=Homo sapiens OX=9606 GN=VCAN PE=1 SV=3	0	50.156	4	11	15	11	1	3396	372.6	4.51	54.87	11	0	103.3	122.2	79.9	104.1	97.7	129.8	Not Found	High	High	Not Found	High	High	High	Not Found	Not Found
FALSE	High	Master Protein	O14818	Proteasome subunit alpha type-7 OS=Homo sapiens OX=9606 GN=PSMA7 PE=1 SV=1	0	50.001	40	8	14	8	1	248	27.9	8.46	52.84	8	0	99.4	104.2	99.2	100	96.1	95.3	Not Found	High	High	High	High	High	High	High	Not Found
FALSE	High	Master Protein	Q15008	26S proteasome non-ATPase regulatory subunit 6 OS=Homo sapiens OX=9606 GN=PSMD6 PE=1 SV=1	0	49.988	32	11	19	11	1	389	45.5	5.62	54.77	11	0	98.6	100.7	97.8	103.7	99.9	99.6	High	High	Not Found	High	High	High	High	High	Not Found
FALSE	High	Master Protein	Q9UHX1	Poly(U)-binding-splicing factor PUF60 OS=Homo sapiens OX=9606 GN=PUF60 PE=1 SV=1	0	49.847	22	12	15	12	1	559	59.8	5.29	48.19	12	0	99.9	100	107.7	93.5	100	95.1	Not Found	High	Not Found	High	High	High	High	High	Not Found
FALSE	High	Master Protein	P21964	Catechol O-methyltransferase OS=Homo sapiens OX=9606 GN=COMT PE=1 SV=2	0	49.741	46	9	10	9	1	271	30	5.47	37.33	9	0	104.6	98.9	102.6	98	104.4	105.7	High	Not Found	High	Not Found	High	High	Not Found	High	Not Found
FALSE	High	Master Protein	P27695	DNA-(apurinic or apyrimidinic site) endonuclease OS=Homo sapiens OX=9606 GN=APEX1 PE=1 SV=2	0	49.734	32	9	13	9	1	318	35.5	8.12	42.94	9	0	95.9	105.2	103.2	107.4	100.7	88.2	High	High	High	Not Found	Not Found	High	High	High	High
FALSE	High	Master Protein	Q69YQ0	Cytospin-A OS=Homo sapiens OX=9606 GN=SPECC1L PE=1 SV=2	0	49.711	12	9	11	9	1	1117	124.5	5.72	37.29	9	0	98.4	100.9	100.7	100.6	100.3	99.5	Not Found	High	Not Found	High	High	High	High	High	Not Found
FALSE	High	Master Protein	P26196	Probable ATP-dependent RNA helicase DDX6 OS=Homo sapiens OX=9606 GN=DDX6 PE=1 SV=2	0	49.679	18	6	13	6	1	483	54.4	8.66	60.66	6	0	94.4	95.2	97.3	95.9	99	115.2	Not Found	Not Found	High	High	High	High	High	High	Not Found
FALSE	High	Master Protein	P62316	Small nuclear ribonucleoprotein Sm D2 OS=Homo sapiens OX=9606 GN=SNRPD2 PE=1 SV=1	0	49.673	62	8	20	8	1	118	13.5	9.91	55.98	8	0	102.3	103.7	103.7	98.8	100.2	90.9	Not Found	High	High	High	High	High	High	High	Not Found
FALSE	High	Master Protein	P49755	Transmembrane emp24 domain-containing protein 10 OS=Homo sapiens OX=9606 GN=TMED10 PE=1 SV=2	0	49.635	35	6	23	6	1	219	25	7.44	77.57	6	0	113.9	108.2	109.6	96.4	88.9	91.3	Not Found	Not Found	High	High	High	High	High	High	Not Found
FALSE	High	Master Protein	Q9UKY7	Protein CDV3 homolog OS=Homo sapiens OX=9606 GN=CDV3 PE=1 SV=1	0	49.608	38	8	20	8	1	258	27.3	6.4	61.7	8	0	94.9	102.7	94.7	102.5	92.8	102.5	High	High	High	High	High	High	High	Not Found	Not Found
FALSE	High	Master Protein	P55145	Mesencephalic astrocyte-derived neurotrophic factor OS=Homo sapiens OX=9606 GN=MANF PE=1 SV=3	0	49.546	46	8	18	8	1	182	20.7	8.69	65.94	8	0	103.5	99	106.9	97.3	100.8	87.6	Not Found	Not Found	Not Found	High	High	High	High	High	Not Found
FALSE	High	Master Protein	Q00688	Peptidyl-prolyl cis-trans isomerase FKBP3 OS=Homo sapiens OX=9606 GN=FKBP3 PE=1 SV=1	0	49.512	47	8	12	8	1	224	25.2	9.28	42.85	8	0	95.6	101.7	99.1	105.9	98.8	93.9	High	Not Found	Not Found	Not Found	High	High	High	High	Not Found
FALSE	High	Master Protein	O75131	Copine-3 OS=Homo sapiens OX=9606 GN=CPNE3 PE=1 SV=1	0	49.485	24	12	17	12	1	537	60.1	5.85	52.58	12	0	102.1	98	100.5	101.7	103.2	95.6	Not Found	Not Found	Not Found	High	High	High	High	High	Not Found
FALSE	High	Master Protein	Q9Y263	Phospholipase A-2-activating protein OS=Homo sapiens OX=9606 GN=PLAA PE=1 SV=2	0	49.431	17	12	15	12	1	795	87.1	6.37	47.05	12	0	98.9	100	98.4	99.9	98.4	95.9	High	High	High	High	High	High	High	High	Not Found
FALSE	High	Master Protein	P10412	Histone H1.4 OS=Homo sapiens OX=9606 GN=H1-4 PE=1 SV=2	0	49.38	26	7	20	1	1	219	21.9	11.03	66.88	7	0	102.7	99.3	103.4	94.6	99.5	110.7	Not Found	Not Found	Not Found	Not Found	Not Found	Not Found	High	Not Found	Not Found
FALSE	High	Master Protein	Q96CW1	AP-2 complex subunit mu OS=Homo sapiens OX=9606 GN=AP2M1 PE=1 SV=2	0	49.363	28	11	23	11	1	435	49.6	9.54	71.73	11	0	104.8	102.5	99.5	97.2	100.6	91.9	Not Found	High	High	High	High	High	High	High	Not Found
FALSE	High	Master Protein	Q6DD88	Atlastin-3 OS=Homo sapiens OX=9606 GN=ATL3 PE=1 SV=1	0	49.347	25	11	14	11	1	541	60.5	5.66	42.25	11	0	109.6	97.3	103.8	95	104	100.1	High	High	High	High	High	High	High	High	Not Found
FALSE	High	Master Protein	Q13045	Protein flightless-1 homolog OS=Homo sapiens OX=9606 GN=FLII PE=1 SV=2	0	49.247	10	12	14	12	1	1269	144.7	6.05	42.63	12	0	95.8	99.2	98.6	99	98.6	102.1	Not Found	Not Found	High	Not Found	High	High	High	High	Not Found
FALSE	High	Master Protein	P15170	Eukaryotic peptide chain release factor GTP-binding subunit ERF3A OS=Homo sapiens OX=9606 GN=GSPT1 PE=1 SV=1	0	49.21	23	11	17	5	1	499	55.7	5.62	49.62	11	7	96.8	102.6	98	100.5	96.5	91	Not Found	Not Found	High	High	High	High	Not Found	Not Found	Not Found
FALSE	High	Master Protein	P60953	Cell division control protein 42 homolog OS=Homo sapiens OX=9606 GN=CDC42 PE=1 SV=2	0	49.137	41	7	24	6	1	191	21.2	6.55	80.65	7	1	106.9	104.6	98.6	107.7	103.1	83.7	Not Found	High	High	Not Found	High	High	High	High	Not Found
FALSE	High	Master Protein	Q9UMS4	Pre-mRNA-processing factor 19 OS=Homo sapiens OX=9606 GN=PRPF19 PE=1 SV=1	0	49.093	28	10	11	10	1	504	55.1	6.61	40.27	10	0	106.8	105.1	109.6	102.7	104.6	92.5	Not Found	Not Found	Not Found	High	Not Found	High	Not Found	High	Not Found
FALSE	High	Master Protein	P04179	Superoxide dismutase [Mn], mitochondrial OS=Homo sapiens OX=9606 GN=SOD2 PE=1 SV=3	0	49.06	42	9	22	9	1	222	24.7	8.25	77.94	9	0	102.9	99.1	109.4	93.1	90.6	102.4	Not Found	Not Found	Not Found	High	High	High	High	High	High
FALSE	High	Master Protein	Q13151	Heterogeneous nuclear ribonucleoprotein A0 OS=Homo sapiens OX=9606 GN=HNRNPA0 PE=1 SV=1	0	49.017	35	9	15	7	1	305	30.8	9.29	51.19	9	0	98	95.4	99.7	93.4	97.9	109.6	Not Found	High	High	High	High	High	High	High	Not Found
FALSE	High	Master Protein	Q9H2U2	Inorganic pyrophosphatase 2, mitochondrial OS=Homo sapiens OX=9606 GN=PPA2 PE=1 SV=2	0	49.006	33	11	14	10	1	334	37.9	7.39	47.57	11	1	104	98.8	100.6	94.9	108.6	109.7	Not Found	High	High	High	High	High	High	High	High
FALSE	High	Master Protein	Q8NEY1	Neuron navigator 1 OS=Homo sapiens OX=9606 GN=NAV1 PE=1 SV=2	0	49.005	7	10	11	10	1	1877	202.3	8.07	39.39	10	0	93.9	99.6	95.1	101.8	101.6	106.4	Not Found	High	High	High	High	Not Found	High	High	Not Found
FALSE	High	Master Protein	P08473	Neprilysin OS=Homo sapiens OX=9606 GN=MME PE=1 SV=2	0	48.998	18	12	14	12	1	750	85.5	5.73	44.97	12	0	99.8	98.7	99.5	101	104.2	107.8	Not Found	Not Found	Not Found	High	High	High	High	High	Not Found
FALSE	High	Master Protein	P00390	Glutathione reductase, mitochondrial OS=Homo sapiens OX=9606 GN=GSR PE=1 SV=2	0	48.908	20	8	13	8	1	522	56.2	8.5	37.49	8	0	93.3	98.1	95.8	100.1	103.1	101.2	Not Found	Not Found	Not Found	High	High	High	High	High	Not Found
FALSE	High	Master Protein	O14579	Coatomer subunit epsilon OS=Homo sapiens OX=9606 GN=COPE PE=1 SV=3	0	48.878	36	8	13	8	1	308	34.5	5.12	46.61	8	0	98.2	104.2	97.4	101.9	98.9	91	High	High	Not Found	Not Found	High	High	High	High	High
FALSE	High	Master Protein	P61313	60S ribosomal protein L15 OS=Homo sapiens OX=9606 GN=RPL15 PE=1 SV=2	0	48.862	50	11	28	11	1	204	24.1	11.62	78.1	11	0	100	95.5	96.3	96.9	101.4	111.4	Not Found	High	High	High	High	High	High	High	Not Found
FALSE	High	Master Protein	P23634	Plasma membrane calcium-transporting ATPase 4 OS=Homo sapiens OX=9606 GN=ATP2B4 PE=1 SV=2	0	48.855	13	12	12	6	1	1241	137.8	6.6	41.78	12	6	99.3	97.6	97	99.8	102.8	111.5	Not Found	High	High	High	High	Not Found	High	Not Found	Not Found
FALSE	High	Master Protein	P49750	YLP motif-containing protein 1 OS=Homo sapiens OX=9606 GN=YLPM1 PE=1 SV=4	0	48.743	6	11	12	10	1	2146	241.5	6.55	39.49	11	1	100.5	95.2	98.4	98.7	99.7	113.2	Not Found	High	High	Not Found	Not Found	Not Found	High	High	Not Found
FALSE	High	Master Protein	P24534	Elongation factor 1-beta OS=Homo sapiens OX=9606 GN=EEF1B2 PE=1 SV=3	0	48.436	47	9	19	7	1	225	24.7	4.67	56.06	9	0	101.4	107	102.9	99.2	95.2	89.9	Not Found	High	Not Found	High	High	High	High	High	Not Found
FALSE	High	Master Protein	E9PAV3	Nascent polypeptide-associated complex subunit alpha, muscle-specific form OS=Homo sapiens OX=9606 GN=NACA PE=1 SV=1	0	48.322	3	5	12	5	1	2078	205.3	9.58	41.18	5	0	100.2	98.5	103.3	94.7	91.8	93.1	Not Found	Not Found	Not Found	High	High	High	Not Found	Not Found	Not Found
FALSE	High	Master Protein	Q13155	Aminoacyl tRNA synthase complex-interacting multifunctional protein 2 OS=Homo sapiens OX=9606 GN=AIMP2 PE=1 SV=2	0	48.297	36	10	13	10	1	320	35.3	8.22	42.69	10	0	97.4	101.3	96.3	103.9	97	95.3	Not Found	Not Found	High	High	High	High	High	Not Found	Not Found
FALSE	High	Master Protein	P61758	Prefoldin subunit 3 OS=Homo sapiens OX=9606 GN=VBP1 PE=1 SV=4	0	48.264	49	10	14	10	1	197	22.6	7.11	36.57	10	0	93.7	97.7	94	102.5	97.9	101.5	High	Not Found	High	High	High	High	High	High	High
FALSE	High	Master Protein	Q92688	Acidic leucine-rich nuclear phosphoprotein 32 family member B OS=Homo sapiens OX=9606 GN=ANP32B PE=1 SV=1	0	48.236	32	9	11	4	1	251	28.8	4.06	38.13	9	4	95.7	99.4	101.3	106.1	102	91.8	Not Found	Not Found	Not Found	High	High	High	High	High	Not Found
FALSE	High	Master Protein	P48735	Isocitrate dehydrogenase [NADP], mitochondrial OS=Homo sapiens OX=9606 GN=IDH2 PE=1 SV=2	0	48.085	28	11	15	10	1	452	50.9	8.69	50.71	11	1	99.8	97.7	95.8	96.1	104.5	115.4	Not Found	High	High	High	High	High	Not Found	High	Not Found
FALSE	High	Master Protein	Q6NUK1	Calcium-binding mitochondrial carrier protein SCaMC-1 OS=Homo sapiens OX=9606 GN=SLC25A24 PE=1 SV=2	0	47.888	19	10	18	10	1	477	53.3	6.33	54.75	10	0	106.6	104.7	107.1	93.5	100.8	93.2	Not Found	Not Found	Not Found	High	High	High	High	High	Not Found
FALSE	High	Master Protein	P30419	Glycylpeptide N-tetradecanoyltransferase 1 OS=Homo sapiens OX=9606 GN=NMT1 PE=1 SV=2	0	47.815	25	10	16	7	1	496	56.8	7.8	47.64	10	2	102.1	105.7	100.1	103.3	94.4	91.3	High	High	High	High	High	High	High	Not Found	Not Found
FALSE	High	Master Protein	Q9NTK5	Obg-like ATPase 1 OS=Homo sapiens OX=9606 GN=OLA1 PE=1 SV=2	0	47.741	36	12	16	12	1	396	44.7	7.81	51.02	12	0	95	104.8	97.4	105.3	94.5	88.4	Not Found	High	High	High	High	High	High	High	Not Found
FALSE	High	Master Protein	P51116	Fragile X mental retardation syndrome-related protein 2 OS=Homo sapiens OX=9606 GN=FXR2 PE=1 SV=2	0	47.733	19	9	12	7	1	673	74.2	6.23	41.9	9	0	99.1	101.4	101.9	100.5	97.2	99.3	Not Found	High	High	Not Found	High	Not Found	High	High	Not Found
FALSE	High	Master Protein	P07602	Prosaposin OS=Homo sapiens OX=9606 GN=PSAP PE=1 SV=2	0	47.667	24	12	19	12	1	524	58.1	5.17	58.46	12	0	123.9	110.8	110.9	89.1	98.4	88.4	Not Found	Not Found	Not Found	High	High	High	High	Not Found	Not Found
FALSE	High	Master Protein	Q15363	Transmembrane emp24 domain-containing protein 2 OS=Homo sapiens OX=9606 GN=TMED2 PE=1 SV=1	0	47.588	32	6	24	6	1	201	22.7	5.17	70.36	6	0	103.9	100.5	99	97.5	101.3	107.8	High	High	High	Not Found	Not Found	High	High	High	Not Found
FALSE	High	Master Protein	O15173	Membrane-associated progesterone receptor component 2 OS=Homo sapiens OX=9606 GN=PGRMC2 PE=1 SV=1	0	47.548	32	5	8	4	1	223	23.8	4.88	36.91	5	1	119.4	99	113.6	91.7	110.5	105.7	Not Found	High	High	High	Not Found	Not Found	Not Found	High	Not Found
FALSE	High	Master Protein	P00750	Tissue-type plasminogen activator OS=Homo sapiens OX=9606 GN=PLAT PE=1 SV=1	0	47.479	23	9	11	9	1	562	62.9	7.8	35.86	9	0	93.3	92.1	93.3	103.4	96.2	97.8	Not Found	High	High	High	High	High	High	Not Found	Not Found
FALSE	High	Master Protein	Q07020	60S ribosomal protein L18 OS=Homo sapiens OX=9606 GN=RPL18 PE=1 SV=2	0	47.424	42	7	18	7	1	188	21.6	11.72	63.27	7	0	100.2	100.3	97.4	99.1	102.6	99.2	Not Found	Not Found	High	High	High	High	High	High	Not Found
FALSE	High	Master Protein	Q9Y5S2	Serine/threonine-protein kinase MRCK beta OS=Homo sapiens OX=9606 GN=CDC42BPB PE=1 SV=2	0	47.352	7	10	10	7	1	1711	194.2	6.37	29.27	10	3	94	95.4	95.4	98.7	102.7	118.6	Not Found	High	High	High	High	Not Found	Not Found	High	Not Found
FALSE	High	Master Protein	P46782	40S ribosomal protein S5 OS=Homo sapiens OX=9606 GN=RPS5 PE=1 SV=4	0	47.347	46	9	40	9	1	204	22.9	9.72	110.43	9	0	104.6	102	78.3	84.8	113.8	100.5	Not Found	Not Found	High	High	High	High	High	High	Not Found
FALSE	High	Master Protein	Q9BXF6	Rab11 family-interacting protein 5 OS=Homo sapiens OX=9606 GN=RAB11FIP5 PE=1 SV=1	0	47.337	19	8	9	8	1	653	70.4	9.23	29.66	8	0	94.6	96	97.1	93.8	100.6	134.1	Not Found	High	High	High	High	High	High	Not Found	Not Found
FALSE	High	Master Protein	P09486	SPARC OS=Homo sapiens OX=9606 GN=SPARC PE=1 SV=1	0	47.329	35	9	15	9	1	303	34.6	4.84	51.85	9	0	115.8	116.8	107.2	93.2	93.2	78.1	High	High	High	High	High	High	High	High	Not Found
FALSE	High	Master Protein	O43252	Bifunctional 3'-phosphoadenosine 5'-phosphosulfate synthase 1 OS=Homo sapiens OX=9606 GN=PAPSS1 PE=1 SV=2	0	47.307	23	12	15	10	1	624	70.8	6.86	42.83	12	0	94.8	100.5	96.8	100.1	97.4	100.4	Not Found	Not Found	High	High	High	High	High	High	Not Found
FALSE	High	Master Protein	P22087	rRNA 2'-O-methyltransferase fibrillarin OS=Homo sapiens OX=9606 GN=FBL PE=1 SV=2	0	47.261	26	7	10	7	1	321	33.8	10.18	39.24	7	0	100.8	98.7	101.7	96.7	103.3	103.9	Not Found	Not Found	High	High	High	High	Not Found	High	Not Found
FALSE	High	Master Protein	P15586	N-acetylglucosamine-6-sulfatase OS=Homo sapiens OX=9606 GN=GNS PE=1 SV=3	0	47.248	19	10	11	10	1	552	62	8.31	37.86	10	0	101.7	100.9	104.5	98.1	102.5	90.4	Not Found	High	High	Not Found	High	High	High	High	Not Found
FALSE	High	Master Protein	Q13443	Disintegrin and metalloproteinase domain-containing protein 9 OS=Homo sapiens OX=9606 GN=ADAM9 PE=1 SV=1	0	47.163	15	11	16	11	1	819	90.5	7.52	43.7	11	0	108.6	103.7	102.9	105.4	104	95.9	High	High	High	High	High	High	High	High	Not Found
FALSE	High	Master Protein	Q12929	Epidermal growth factor receptor kinase substrate 8 OS=Homo sapiens OX=9606 GN=EPS8 PE=1 SV=1	0	46.968	16	10	11	10	1	822	91.8	7.5	35.08	10	0	97.1	93.3	92	92.4	97.9	140.2	Not Found	High	Not Found	High	High	High	High	Not Found	Not Found
FALSE	High	Master Protein	O76003	Glutaredoxin-3 OS=Homo sapiens OX=9606 GN=GLRX3 PE=1 SV=2	0	46.926	35	10	11	10	1	335	37.4	5.39	37.68	10	0	93.3	95.2	95.3	97.8	96.2	114.9	Not Found	High	High	Not Found	High	High	Not Found	High	Not Found
FALSE	High	Master Protein	Q13620	Cullin-4B OS=Homo sapiens OX=9606 GN=CUL4B PE=1 SV=4	0	46.913	13	11	11	7	1	913	103.9	7.37	30.59	11	4	96.5	99.8	101.6	102.8	99.6	88.8	High	Not Found	Not Found	High	Not Found	High	High	High	High
FALSE	High	Master Protein	Q08945	FACT complex subunit SSRP1 OS=Homo sapiens OX=9606 GN=SSRP1 PE=1 SV=1	0	46.642	19	11	12	11	1	709	81	6.87	39.14	11	0	98.8	96.3	102.4	94.9	102.7	103.2	Not Found	Not Found	Not Found	High	High	High	High	High	Not Found
FALSE	High	Master Protein	Q9BPW9	Dehydrogenase/reductase SDR family member 9 OS=Homo sapiens OX=9606 GN=DHRS9 PE=1 SV=1	0	46.586	26	8	11	8	1	319	35.2	8.6	36.88	8	0	110.2	98.2	103	98	104.1	100.6	Not Found	Not Found	High	High	High	High	High	High	Not Found
FALSE	High	Master Protein	O94925	Glutaminase kidney isoform, mitochondrial OS=Homo sapiens OX=9606 GN=GLS PE=1 SV=1	0	46.573	19	8	11	8	1	669	73.4	7.77	43.27	8	0	99.1	99.3	91.8	101.6	105.6	105.7	Not Found	Not Found	Not Found	High	High	High	High	High	Not Found
FALSE	High	Master Protein	P28300	Protein-lysine 6-oxidase OS=Homo sapiens OX=9606 GN=LOX PE=1 SV=2	0	46.556	21	6	10	6	1	417	46.9	8.09	35.37	6	0	97.2	90.8	96.3	101.2	114.2	104.6	Not Found	High	High	High	High	Not Found	Not Found	High	Not Found
FALSE	High	Master Protein	Q03135	Caveolin-1 OS=Homo sapiens OX=9606 GN=CAV1 PE=1 SV=4	0	46.465	46	8	15	8	1	178	20.5	6.02	53.55	8	0	110.5	100.8	103.3	103	108.7	101	Not Found	Not Found	High	High	High	High	High	Not Found	Not Found
FALSE	High	Master Protein	Q14980	Nuclear mitotic apparatus protein 1 OS=Homo sapiens OX=9606 GN=NUMA1 PE=1 SV=2	0	46.463	5	9	11	8	1	2115	238.1	5.78	37.86	9	1	99.8	92	100.9	97	100.6	117.3	High	High	High	High	High	Not Found	Not Found	Not Found	High
FALSE	High	Master Protein	Q13011	Delta(3,5)-Delta(2,4)-dienoyl-CoA isomerase, mitochondrial OS=Homo sapiens OX=9606 GN=ECH1 PE=1 SV=2	0	46.428	33	8	12	8	1	328	35.8	8	48.16	8	0	100.3	98.3	100.1	100.1	104.5	106.4	Not Found	High	High	High	High	High	High	Not Found	Not Found
FALSE	High	Master Protein	Q7Z4V5	Hepatoma-derived growth factor-related protein 2 OS=Homo sapiens OX=9606 GN=HDGFL2 PE=1 SV=1	0	46.281	16	8	11	7	1	671	74.3	7.49	31.23	8	0	103.7	101.6	103.6	98.4	96.5	99	High	High	Not Found	High	High	Not Found	High	Not Found	Not Found
FALSE	High	Master Protein	P61221	ATP-binding cassette sub-family E member 1 OS=Homo sapiens OX=9606 GN=ABCE1 PE=1 SV=1	0	46.254	19	12	14	12	1	599	67.3	8.34	46.27	12	0	91.2	101.7	94.3	105.9	96.1	97.6	Not Found	High	High	High	Not Found	High	High	High	Not Found
FALSE	High	Master Protein	Q969X5	Endoplasmic reticulum-Golgi intermediate compartment protein 1 OS=Homo sapiens OX=9606 GN=ERGIC1 PE=1 SV=1	0	46.25	33	8	13	8	1	290	32.6	7.06	48.24	8	0	102.8	96.1	100.1	97.8	112.6	105.7	Not Found	Not Found	High	High	High	High	High	Not Found	Not Found
FALSE	High	Master Protein	P15559	NAD(P)H dehydrogenase [quinone] 1 OS=Homo sapiens OX=9606 GN=NQO1 PE=1 SV=1	0	46.192	38	9	16	9	1	274	30.8	8.88	50.58	9	0	101.4	106.2	100.6	101	96.1	82.7	Not Found	Not Found	High	High	High	High	High	High	Not Found
FALSE	High	Master Protein	Q6P2Q9	Pre-mRNA-processing-splicing factor 8 OS=Homo sapiens OX=9606 GN=PRPF8 PE=1 SV=2	0	46.185	6	12	13	12	1	2335	273.4	8.84	42.14	12	0	94.3	96.9	102	99.3	101	107.5	Not Found	High	High	High	High	High	High	High	Not Found
FALSE	High	Master Protein	P62495	Eukaryotic peptide chain release factor subunit 1 OS=Homo sapiens OX=9606 GN=ETF1 PE=1 SV=3	0	46.093	27	8	8	8	1	437	49	5.71	27.32	8	0	94.8	100.1	97.1	96.5	93.4	106.1	Not Found	Not Found	High	High	High	High	Not Found	High	Not Found
FALSE	High	Master Protein	Q01844	RNA-binding protein EWS OS=Homo sapiens OX=9606 GN=EWSR1 PE=1 SV=1	0	46.078	14	6	13	6	1	656	68.4	9.33	56.78	6	0	102.9	99.1	100.8	93.8	99.2	105	Not Found	High	High	Not Found	High	High	Not Found	Not Found	Not Found
FALSE	High	Master Protein	P31153	S-adenosylmethionine synthase isoform type-2 OS=Homo sapiens OX=9606 GN=MAT2A PE=1 SV=1	0	46.066	33	11	12	11	1	395	43.6	6.48	36.23	11	0	95.9	93.5	96.7	94.2	94.5	110.8	Not Found	Not Found	Not Found	High	High	High	High	Not Found	Not Found
FALSE	High	Master Protein	Q9NVI7	ATPase family AAA domain-containing protein 3A OS=Homo sapiens OX=9606 GN=ATAD3A PE=1 SV=2	0	46.034	21	13	15	5	1	634	71.3	8.98	40.93	13	7	104.3	94.7	95.1	94.2	106.2	117.4	Not Found	Not Found	Not Found	High	Not Found	High	Not Found	High	Not Found
FALSE	High	Master Protein	P08237	ATP-dependent 6-phosphofructokinase, muscle type OS=Homo sapiens OX=9606 GN=PFKM PE=1 SV=2	0	45.919	14	10	16	7	1	780	85.1	7.99	45.73	10	0	88.5	96.7	93.6	102.3	97.1	111.7	High	Not Found	Not Found	Not Found	High	High	High	High	Not Found
FALSE	High	Master Protein	P02795	Metallothionein-2 OS=Homo sapiens OX=9606 GN=MT2A PE=1 SV=1	0	45.904	67	4	19	4	1	61	6	7.83	71	4	0	101.9	118.6	101.6	120	83.7	56.7	Not Found	Not Found	High	High	High	High	High	High	Not Found
FALSE	High	Master Protein	Q12907	Vesicular integral-membrane protein VIP36 OS=Homo sapiens OX=9606 GN=LMAN2 PE=1 SV=1	0	45.863	37	10	13	10	1	356	40.2	6.95	43.76	10	0	111.3	104	108.9	98.7	101.7	100.2	Not Found	High	Not Found	High	High	High	High	High	Not Found
FALSE	High	Master Protein	Q9BY44	Eukaryotic translation initiation factor 2A OS=Homo sapiens OX=9606 GN=EIF2A PE=1 SV=3	0	45.806	26	11	12	11	1	585	64.9	8.87	39.98	11	0	94.7	98.4	99.2	100.5	101.7	99.5	Not Found	Not Found	High	High	High	High	High	High	Not Found
FALSE	High	Master Protein	Q6IBS0	Twinfilin-2 OS=Homo sapiens OX=9606 GN=TWF2 PE=1 SV=2	0	45.75	36	10	10	9	1	349	39.5	6.84	30	10	0	90.8	98.2	95.7	102.8	96.6	110	Not Found	High	High	High	High	Not Found	High	High	Not Found
FALSE	High	Master Protein	P26373	60S ribosomal protein L13 OS=Homo sapiens OX=9606 GN=RPL13 PE=1 SV=4	0	45.748	39	9	39	9	1	211	24.2	11.65	117.33	9	0	102.3	98.9	100.9	98.5	98.7	101.5	High	High	High	High	High	High	High	High	High
FALSE	High	Master Protein	P83731	60S ribosomal protein L24 OS=Homo sapiens OX=9606 GN=RPL24 PE=1 SV=1	0	45.699	40	9	22	9	1	157	17.8	11.25	70.93	9	0	103.3	103	103.9	102.6	91.9	86.2	Not Found	Not Found	High	High	High	High	High	High	Not Found
FALSE	High	Master Protein	P62269	40S ribosomal protein S18 OS=Homo sapiens OX=9606 GN=RPS18 PE=1 SV=3	0	45.665	48	8	26	8	1	152	17.7	10.99	69.61	8	0	100.6	99.1	100.7	95.3	101.9	101.8	High	Not Found	Not Found	Not Found	High	High	High	High	High
FALSE	High	Master Protein	P62249	40S ribosomal protein S16 OS=Homo sapiens OX=9606 GN=RPS16 PE=1 SV=2	0	45.469	61	12	28	12	1	146	16.4	10.21	75.81	12	0	99.6	94.1	97.5	94.1	106.2	108.6	Not Found	Not Found	High	High	High	High	High	High	Not Found
FALSE	High	Master Protein	P15531	Nucleoside diphosphate kinase A OS=Homo sapiens OX=9606 GN=NME1 PE=1 SV=1	0	45.463	49	8	32	3	1	152	17.1	6.19	138.08	8	0	92.5	100.3	99.1	102.1	98.3	92.2	Not Found	Not Found	Not Found	High	High	Not Found	Not Found	High	Not Found
FALSE	High	Master Protein	O00629	Importin subunit alpha-3 OS=Homo sapiens OX=9606 GN=KPNA4 PE=1 SV=1	0	45.397	11	4	8	2	1	521	57.9	4.96	34.57	4	2	100.2	104.8	100.3	101.7	99.4	90.5	Not Found	Not Found	High	High	Not Found	Not Found	Not Found	Not Found	Not Found
FALSE	High	Master Protein	P04632	Calpain small subunit 1 OS=Homo sapiens OX=9606 GN=CAPNS1 PE=1 SV=1	0	45.333	35	7	12	7	1	268	28.3	5.2	38.19	7	0	97.6	105.6	97.1	101.8	97.9	83.5	High	Not Found	High	High	High	High	High	High	Not Found
FALSE	High	Master Protein	Q9Y224	RNA transcription, translation and transport factor protein OS=Homo sapiens OX=9606 GN=RTRAF PE=1 SV=1	0	45.293	42	10	14	10	1	244	28.1	6.65	45.26	10	0	103.6	101.6	103.2	97.5	103.2	96.9	Not Found	Not Found	Not Found	High	High	High	High	High	Not Found
FALSE	High	Master Protein	P16401	Histone H1.5 OS=Homo sapiens OX=9606 GN=H1-5 PE=1 SV=3	0	45.279	30	8	19	6	1	226	22.6	10.92	61.37	8	0	100.5	99	96.5	95	94.9	94.7	Not Found	Not Found	Not Found	High	High	High	High	High	Not Found
FALSE	High	Master Protein	P39687	Acidic leucine-rich nuclear phosphoprotein 32 family member A OS=Homo sapiens OX=9606 GN=ANP32A PE=1 SV=1	0	45.247	33	9	11	4	1	249	28.6	4.09	40.77	9	0	98.8	97.8	97.6	102.6	103.6	103.8	Not Found	Not Found	High	Not Found	High	Not Found	High	Not Found	Not Found
FALSE	High	Master Protein	P49419	Alpha-aminoadipic semialdehyde dehydrogenase OS=Homo sapiens OX=9606 GN=ALDH7A1 PE=1 SV=5	0	45.235	21	9	12	9	1	539	58.5	7.99	38.89	9	0	104.1	99.1	97.9	95.9	105.7	98.7	Not Found	High	High	High	Not Found	High	High	High	Not Found
FALSE	High	Master Protein	Q8TBA6	Golgin subfamily A member 5 OS=Homo sapiens OX=9606 GN=GOLGA5 PE=1 SV=3	0	45.219	15	8	8	8	1	731	83	5.83	28.08	8	0	100.9	100.2	102.2	97.5	103.9	109.5	High	High	Not Found	High	High	Not Found	High	Not Found	Not Found
FALSE	High	Master Protein	Q13404	Ubiquitin-conjugating enzyme E2 variant 1 OS=Homo sapiens OX=9606 GN=UBE2V1 PE=1 SV=2	0	45.088	68	9	20	4	1	147	16.5	7.93	61.5	9	6	91.1	96.8	95.5	100.7	98.2	105.9	Not Found	Not Found	Not Found	High	High	Not Found	High	Not Found	Not Found
FALSE	High	Master Protein	P62266	40S ribosomal protein S23 OS=Homo sapiens OX=9606 GN=RPS23 PE=1 SV=3	0	45.083	49	6	17	6	1	143	15.8	10.49	63.53	6	0	96.4	97.5	99.5	101	100.6	107.6	Not Found	Not Found	Not Found	High	High	High	High	High	Not Found
FALSE	High	Master Protein	P12109	Collagen alpha-1(VI) chain OS=Homo sapiens OX=9606 GN=COL6A1 PE=1 SV=3	0	45.029	10	8	11	8	1	1028	108.5	5.43	35.78	8	0	103.5	105.3	105.3	88.7	96.7	106.1	Not Found	Not Found	High	High	High	High	High	High	High
FALSE	High	Master Protein	Q96E39	RNA binding motif protein, X-linked-like-1 OS=Homo sapiens OX=9606 GN=RBMXL1 PE=1 SV=1	0	44.963	27	11	21	1	1	390	42.1	9.89	59.75	11	0	94.5	100.7	96.7	96	99.4	112.3	Not Found	Not Found	Not Found	High	Not Found	Not Found	Not Found	Not Found	Not Found
FALSE	High	Master Protein	P46781	40S ribosomal protein S9 OS=Homo sapiens OX=9606 GN=RPS9 PE=1 SV=3	0	44.932	56	14	33	14	1	194	22.6	10.65	85.97	14	0	112.1	98.7	96.7	89.3	111.1	91.8	High	High	High	High	High	High	High	High	Not Found
FALSE	High	Master Protein	Q8N163	Cell cycle and apoptosis regulator protein 2 OS=Homo sapiens OX=9606 GN=CCAR2 PE=1 SV=2	0	44.921	14	10	11	10	1	923	102.8	5.22	38.4	10	0	102.7	95.9	101.1	96.2	99.7	108.3	Not Found	High	Not Found	High	High	High	High	Not Found	Not Found
FALSE	High	Master Protein	P15289	Arylsulfatase A OS=Homo sapiens OX=9606 GN=ARSA PE=1 SV=3	0	44.913	14	6	9	5	1	507	53.6	6.07	29.61	6	1	94	93.7	96.7	97.6	105.8	122.6	Not Found	High	Not Found	High	High	High	High	High	Not Found
FALSE	High	Master Protein	Q9Y5B9	FACT complex subunit SPT16 OS=Homo sapiens OX=9606 GN=SUPT16H PE=1 SV=1	0	44.91	11	12	15	12	1	1047	119.8	5.66	43.24	12	0	103.9	104.5	101.7	94.8	96.7	98.1	High	High	High	High	High	High	High	High	Not Found
FALSE	High	Master Protein	O95394	Phosphoacetylglucosamine mutase OS=Homo sapiens OX=9606 GN=PGM3 PE=1 SV=1	0	44.887	17	10	18	10	1	542	59.8	6.25	53.86	10	0	92.6	98.2	95.5	100.9	101.4	99.3	High	High	Not Found	Not Found	High	High	High	Not Found	Not Found
FALSE	High	Master Protein	P61011	Signal recognition particle 54 kDa protein OS=Homo sapiens OX=9606 GN=SRP54 PE=1 SV=1	0	44.85	21	11	15	11	1	504	55.7	8.75	47.79	11	0	95.7	101.4	92.5	99.8	104	97.7	High	Not Found	High	Not Found	High	High	High	High	High
FALSE	High	Master Protein	Q969G5	Caveolae-associated protein 3 OS=Homo sapiens OX=9606 GN=CAVIN3 PE=1 SV=3	0	44.811	31	7	11	7	1	261	27.7	6.43	38.91	7	0	100.6	92.8	98.9	93.8	107.9	114.8	Not Found	High	High	High	Not Found	High	High	High	Not Found
FALSE	High	Master Protein	P08621	U1 small nuclear ribonucleoprotein 70 kDa OS=Homo sapiens OX=9606 GN=SNRNP70 PE=1 SV=2	0	44.703	24	10	18	10	1	437	51.5	9.94	52.3	10	0	101.1	98.1	103.1	99.2	100.7	104.8	High	High	High	High	High	High	Not Found	Not Found	Not Found
FALSE	High	Master Protein	O43765	Small glutamine-rich tetratricopeptide repeat-containing protein alpha OS=Homo sapiens OX=9606 GN=SGTA PE=1 SV=1	0	44.594	36	10	13	10	1	313	34	4.87	37.44	10	0	94.2	101.9	106.8	98.1	95.8	95.9	High	Not Found	High	Not Found	High	High	High	High	High
FALSE	High	Master Protein	P60981	Destrin OS=Homo sapiens OX=9606 GN=DSTN PE=1 SV=3	0	44.546	40	9	26	8	1	165	18.5	7.85	71.84	9	0	92.6	107.4	98.2	109.8	94.3	82.5	High	Not Found	High	Not Found	High	High	High	High	Not Found
FALSE	High	Master Protein	P52926	High mobility group protein HMGI-C OS=Homo sapiens OX=9606 GN=HMGA2 PE=1 SV=1	0	44.491	41	6	28	6	1	109	11.8	10.62	123.33	6	0	100.8	94.9	105.5	98.6	106.9	95.2	Not Found	High	High	High	High	High	Not Found	High	Not Found
FALSE	High	Master Protein	P23381	Tryptophan--tRNA ligase, cytoplasmic OS=Homo sapiens OX=9606 GN=WARS1 PE=1 SV=2	0	44.436	20	8	10	8	1	471	53.1	6.23	34.05	8	0	92.7	101.1	96.6	104.2	95.6	97.8	Not Found	High	High	Not Found	High	High	High	High	High
FALSE	High	Master Protein	P46779	60S ribosomal protein L28 OS=Homo sapiens OX=9606 GN=RPL28 PE=1 SV=3	0	44.374	50	9	31	9	1	137	15.7	12.02	100.48	9	0	102.7	101.5	103.3	99.1	95.4	96.2	Not Found	Not Found	High	High	High	High	High	High	Not Found
FALSE	High	Master Protein	Q9BZZ5	Apoptosis inhibitor 5 OS=Homo sapiens OX=9606 GN=API5 PE=1 SV=3	0	44.337	20	9	10	9	1	524	59	7.34	36.99	9	0	98.9	99	101.6	97.5	103.7	91.9	Not Found	Not Found	High	Not Found	High	High	High	High	Not Found
FALSE	High	Master Protein	Q7Z2W4	Zinc finger CCCH-type antiviral protein 1 OS=Homo sapiens OX=9606 GN=ZC3HAV1 PE=1 SV=3	0	44.309	12	9	12	9	1	902	101.4	8.4	37.28	9	0	96.6	100	97.8	100.5	103.7	96.2	High	High	High	High	High	High	High	High	Not Found
FALSE	High	Master Protein	P18085	ADP-ribosylation factor 4 OS=Homo sapiens OX=9606 GN=ARF4 PE=1 SV=3	0	44.276	56	8	15	5	1	180	20.5	7.14	50.18	8	3	98.5	95	92.8	104	100.5	113.6	Not Found	Not Found	High	High	High	Not Found	High	High	Not Found
FALSE	High	Master Protein	Q8IVL6	Prolyl 3-hydroxylase 3 OS=Homo sapiens OX=9606 GN=P3H3 PE=1 SV=1	0	44.241	17	11	12	11	1	736	81.8	6.32	38.26	11	0	99.9	96.6	98.8	96	100.8	114.5	High	High	High	High	High	Not Found	High	Not Found	High
FALSE	High	Master Protein	Q9HBL0	Tensin-1 OS=Homo sapiens OX=9606 GN=TNS1 PE=1 SV=2	0	44.204	8	10	12	8	1	1735	185.6	7.75	35.46	10	2	100	99.4	96.3	103.2	99.7	106.7	Not Found	High	High	High	High	Not Found	Not Found	High	Not Found
FALSE	High	Master Protein	O75477	Erlin-1 OS=Homo sapiens OX=9606 GN=ERLIN1 PE=1 SV=2	0	44.134	27	9	11	6	1	348	39.1	7.87	41.47	9	0	103	98.7	100.2	101.8	104.3	97.1	Not Found	Not Found	High	Not Found	High	High	Not Found	High	Not Found
FALSE	High	Master Protein	P51571	Translocon-associated protein subunit delta OS=Homo sapiens OX=9606 GN=SSR4 PE=1 SV=1	0	44.084	36	5	16	5	1	173	19	6.15	56.73	5	0	102.6	94.4	100.2	96	111.8	104.3	Not Found	High	High	Not Found	High	High	High	High	Not Found
FALSE	High	Master Protein	O75367	Core histone macro-H2A.1 OS=Homo sapiens OX=9606 GN=MACROH2A1 PE=1 SV=4	0	44.002	26	9	9	9	1	372	39.6	9.79	34.67	9	0	111.3	103.1	104.9	92.9	103.7	80.7	Not Found	Not Found	High	High	High	High	High	High	Not Found
FALSE	High	Master Protein	O95433	Activator of 90 kDa heat shock protein ATPase homolog 1 OS=Homo sapiens OX=9606 GN=AHSA1 PE=1 SV=1	0	43.998	27	8	12	8	1	338	38.3	5.53	39.21	8	0	92	98.4	98.8	99.1	95.8	100	Not Found	High	High	High	Not Found	High	High	High	Not Found
FALSE	High	Master Protein	Q5JWF2	Guanine nucleotide-binding protein G(s) subunit alpha isoforms XLas OS=Homo sapiens OX=9606 GN=GNAS PE=1 SV=2	0	43.961	11	10	13	9	1	1037	111	5.03	44.71	10	0	106.1	96.4	99.5	92.3	104.7	116.9	High	High	High	High	High	Not Found	High	High	Not Found
FALSE	High	Master Protein	Q96G03	Phosphoglucomutase-2 OS=Homo sapiens OX=9606 GN=PGM2 PE=1 SV=4	0	43.956	19	9	10	9	1	612	68.2	6.73	34.92	9	0	94.7	100	93.9	102	100.5	106.2	Not Found	Not Found	High	High	High	High	High	Not Found	Not Found
FALSE	High	Master Protein	Q6UB35	Monofunctional C1-tetrahydrofolate synthase, mitochondrial OS=Homo sapiens OX=9606 GN=MTHFD1L PE=1 SV=1	0	43.941	10	8	12	8	1	978	105.7	8.06	35.88	8	0	107.5	101.4	95.6	101.1	108.6	94.5	Not Found	High	High	High	Not Found	High	High	High	Not Found
FALSE	High	Master Protein	P52943	Cysteine-rich protein 2 OS=Homo sapiens OX=9606 GN=CRIP2 PE=1 SV=1	0	43.834	20	4	9	4	1	208	22.5	8.72	37.99	4	0	91.5	98.3	95.5	96.7	99.4	116.3	Not Found	Not Found	Not Found	High	High	Not Found	High	High	Not Found
FALSE	High	Master Protein	Q12792	Twinfilin-1 OS=Homo sapiens OX=9606 GN=TWF1 PE=1 SV=3	0	43.781	26	9	12	8	1	350	40.3	6.96	36.75	9	0	97.9	97.3	96.9	105	101	100	Not Found	Not Found	High	High	High	Not Found	High	High	Not Found
FALSE	High	Master Protein	P48637	Glutathione synthetase OS=Homo sapiens OX=9606 GN=GSS PE=1 SV=1	0	43.698	25	11	12	11	1	474	52.4	5.92	36.58	11	0	94.7	98.6	98.5	100.3	98.3	104.5	Not Found	High	High	High	High	High	High	High	Not Found
FALSE	High	Master Protein	P49591	Serine--tRNA ligase, cytoplasmic OS=Homo sapiens OX=9606 GN=SARS1 PE=1 SV=3	0	43.597	27	11	14	11	1	514	58.7	6.43	45.11	11	0	89.1	98	92.5	105.7	100.6	104.9	High	High	High	High	High	High	High	Not Found	Not Found
FALSE	High	Master Protein	Q9H8Y8	Golgi reassembly-stacking protein 2 OS=Homo sapiens OX=9606 GN=GORASP2 PE=1 SV=3	0	43.583	27	9	17	9	1	452	47.1	4.82	53.21	9	0	100.7	95.3	101.1	93.2	106.1	105.2	Not Found	High	High	High	High	High	High	High	Not Found
FALSE	High	Master Protein	P48147	Prolyl endopeptidase OS=Homo sapiens OX=9606 GN=PREP PE=1 SV=2	0	43.56	16	11	11	11	1	710	80.6	5.86	32.75	11	0	89.6	94.8	94.5	104.8	100.2	105.1	Not Found	Not Found	High	High	High	High	High	High	Not Found
FALSE	High	Master Protein	Q8IXB1	DnaJ homolog subfamily C member 10 OS=Homo sapiens OX=9606 GN=DNAJC10 PE=1 SV=2	0	43.358	15	10	12	10	1	793	91	7.18	38.61	10	0	102.3	96.8	103	94.4	104	114.5	High	High	High	High	Not Found	High	High	Not Found	Not Found
FALSE	High	Master Protein	Q15717	ELAV-like protein 1 OS=Homo sapiens OX=9606 GN=ELAVL1 PE=1 SV=2	0	43.186	32	8	10	8	1	326	36.1	9.17	36.57	8	0	101.1	101.7	101.2	100.5	101.2	97.1	Not Found	Not Found	High	Not Found	High	High	High	High	Not Found
FALSE	High	Master Protein	O14964	Hepatocyte growth factor-regulated tyrosine kinase substrate OS=Homo sapiens OX=9606 GN=HGS PE=1 SV=1	0	43.172	11	9	16	9	1	777	86.1	6.16	49.09	9	0	97.6	99.3	98	100.2	101.6	100.3	High	High	High	Not Found	High	High	High	Not Found	Not Found
FALSE	High	Master Protein	P18621	60S ribosomal protein L17 OS=Homo sapiens OX=9606 GN=RPL17 PE=1 SV=3	0	43.158	50	8	40	7	1	184	21.4	10.17	121.3	8	0	101	105.6	102.5	102.6	96.8	82.8	Not Found	Not Found	High	High	High	High	High	High	Not Found
FALSE	High	Master Protein	P31689	DnaJ homolog subfamily A member 1 OS=Homo sapiens OX=9606 GN=DNAJA1 PE=1 SV=2	0	43.079	30	10	12	10	1	397	44.8	7.08	44.99	10	0	93.1	99.3	97.9	104.8	90.6	91.3	Not Found	Not Found	Not Found	High	High	High	High	High	Not Found
FALSE	High	Master Protein	Q9NQW7	Xaa-Pro aminopeptidase 1 OS=Homo sapiens OX=9606 GN=XPNPEP1 PE=1 SV=3	0	43.032	21	12	13	12	1	623	69.9	5.67	36.48	12	0	94.2	99.5	95.5	104.2	95.4	101.7	Not Found	Not Found	Not Found	High	High	High	High	High	High
FALSE	High	Master Protein	Q14789	Golgin subfamily B member 1 OS=Homo sapiens OX=9606 GN=GOLGB1 PE=1 SV=2	0	42.932	3	10	11	9	1	3259	375.8	5	34.48	10	1	100.2	98.7	99.6	96.7	102.9	125.4	Not Found	Not Found	High	High	Not Found	High	Not Found	Not Found	Not Found
FALSE	High	Master Protein	P62917	60S ribosomal protein L8 OS=Homo sapiens OX=9606 GN=RPL8 PE=1 SV=2	0	42.912	47	11	49	11	1	257	28	11.03	133.44	11	0	96	93.3	95.9	93	98.8	128.5	Not Found	High	High	High	High	High	High	High	Not Found
FALSE	High	Master Protein	Q9NUU7	ATP-dependent RNA helicase DDX19A OS=Homo sapiens OX=9606 GN=DDX19A PE=1 SV=1	0	42.823	19	8	11	8	1	478	53.9	6.58	35.61	8	0	97.9	104.2	97.1	107.5	92.6	86.5	High	High	High	High	Not Found	High	High	Not Found	Not Found
FALSE	High	Master Protein	P10915	Hyaluronan and proteoglycan link protein 1 OS=Homo sapiens OX=9606 GN=HAPLN1 PE=2 SV=2	0	42.821	30	10	13	10	1	354	40.1	7.42	41.54	10	0	102	119	84.4	100.3	96.8	120.5	Not Found	High	High	High	High	High	High	High	Not Found
FALSE	High	Master Protein	P11766	Alcohol dehydrogenase class-3 OS=Homo sapiens OX=9606 GN=ADH5 PE=1 SV=4	0	42.755	33	10	13	10	1	374	39.7	7.49	38.97	10	0	90.2	95.5	98.9	101.7	93.6	104.1	Not Found	Not Found	Not Found	High	High	High	Not Found	High	Not Found
FALSE	High	Master Protein	A0A0B4J2D5	Putative glutamine amidotransferase-like class 1 domain-containing protein 3B, mitochondrial OS=Homo sapiens OX=9606 GN=GATD3B PE=5 SV=1	0	42.675	46	7	10	7	1	268	28.1	8.27	36.95	7	0	102.8	96.2	102.1	97.1	107.7	104.8	Not Found	High	Not Found	Not Found	High	High	High	High	Not Found
FALSE	High	Master Protein	P10253	Lysosomal alpha-glucosidase OS=Homo sapiens OX=9606 GN=GAA PE=1 SV=4	0	42.604	11	8	10	8	1	952	105.3	6	35.31	8	0	97.9	96.4	93.4	93.8	106.8	109.2	Not Found	Not Found	Not Found	High	High	High	High	High	Not Found
FALSE	High	Master Protein	Q9NX63	MICOS complex subunit MIC19 OS=Homo sapiens OX=9606 GN=CHCHD3 PE=1 SV=1	0	42.585	36	8	16	8	1	227	26.1	8.28	49.77	8	0	101.6	99.3	102.3	98	97.7	105.6	High	High	High	High	High	Not Found	High	High	High
FALSE	High	Master Protein	O75439	Mitochondrial-processing peptidase subunit beta OS=Homo sapiens OX=9606 GN=PMPCB PE=1 SV=2	0	42.478	18	7	10	7	1	489	54.3	6.83	36	7	0	110	100.1	102.1	104.2	108.7	85.9	Not Found	Not Found	High	High	High	High	High	High	Not Found
FALSE	High	Master Protein	P51572	B-cell receptor-associated protein 31 OS=Homo sapiens OX=9606 GN=BCAP31 PE=1 SV=3	0	42.451	38	10	18	10	1	246	28	8.44	47.96	10	0	117.6	102.3	107.7	101.5	100.3	94.9	Not Found	High	High	High	High	High	High	Not Found	Not Found
FALSE	High	Master Protein	P08754	Guanine nucleotide-binding protein G(i) subunit alpha-3 OS=Homo sapiens OX=9606 GN=GNAI3 PE=1 SV=3	0	42.332	26	8	11	2	1	354	40.5	5.69	37.47	8	0	98.2	93.8	97	99.6	100.1	110.9	Not Found	Not Found	Not Found	High	High	Not Found	Not Found	Not Found	Not Found
FALSE	High	Master Protein	Q14108	Lysosome membrane protein 2 OS=Homo sapiens OX=9606 GN=SCARB2 PE=1 SV=2	0	42.215	19	8	14	8	1	478	54.3	5.14	52.67	8	0	107.4	102.6	101.1	101.4	102.4	107.9	Not Found	High	High	High	High	High	High	Not Found	Not Found
FALSE	High	Master Protein	P52594	Arf-GAP domain and FG repeat-containing protein 1 OS=Homo sapiens OX=9606 GN=AGFG1 PE=1 SV=2	0	42.211	16	6	13	6	1	562	58.2	8.63	45.98	6	0	95.9	101.5	98.7	101	99	102.4	Not Found	Not Found	Not Found	High	High	High	High	High	Not Found
FALSE	High	Master Protein	A5YKK6	CCR4-NOT transcription complex subunit 1 OS=Homo sapiens OX=9606 GN=CNOT1 PE=1 SV=2	0	42.188	5	13	14	13	1	2376	266.8	7.11	39.85	13	0	95	96.7	96.3	98.6	103.1	113.7	Not Found	High	Not Found	High	High	High	High	High	High
FALSE	High	Master Protein	P00352	Aldehyde dehydrogenase 1A1 OS=Homo sapiens OX=9606 GN=ALDH1A1 PE=1 SV=2	0	42.172	20	9	19	7	1	501	54.8	6.73	59.37	9	2	93.9	99.3	99.7	99.9	98.8	98.2	Not Found	Not Found	Not Found	High	High	High	Not Found	High	Not Found
FALSE	High	Master Protein	Q92823	Neuronal cell adhesion molecule OS=Homo sapiens OX=9606 GN=NRCAM PE=1 SV=3	0	42.147	8	9	12	9	1	1304	143.8	5.66	36.3	9	0	101.8	100.6	98.5	100.6	104.1	109.6	High	High	Not Found	High	High	High	High	High	Not Found
FALSE	High	Master Protein	Q969V3	Nicalin OS=Homo sapiens OX=9606 GN=NCLN PE=1 SV=2	0	42.083	16	7	8	7	1	563	62.9	6.89	29.48	7	0	102.2	96.1	96.3	94.1	101.6	117	Not Found	Not Found	Not Found	High	High	High	High	Not Found	Not Found
FALSE	High	Master Protein	Q8N6T3	ADP-ribosylation factor GTPase-activating protein 1 OS=Homo sapiens OX=9606 GN=ARFGAP1 PE=1 SV=2	0	42.078	28	7	7	7	1	406	44.6	5.66	28.55	7	0	91	98.9	95.5	107.1	100.3	100.4	Not Found	Not Found	Not Found	High	High	High	High	Not Found	Not Found
FALSE	High	Master Protein	P35658	Nuclear pore complex protein Nup214 OS=Homo sapiens OX=9606 GN=NUP214 PE=1 SV=2	0	41.867	7	10	10	10	1	2090	213.5	7.47	30.01	10	0	99.2	104.5	99.7	107.1	99.4	84.9	Not Found	High	Not Found	High	High	High	High	High	Not Found
FALSE	High	Master Protein	P50281	Matrix metalloproteinase-14 OS=Homo sapiens OX=9606 GN=MMP14 PE=1 SV=3	0	41.756	16	9	11	9	1	582	65.9	7.77	36.71	9	0	100.7	95.7	100.6	96.1	101.1	108.9	Not Found	Not Found	High	High	High	High	High	Not Found	Not Found
FALSE	High	Master Protein	Q8WUH6	Transmembrane protein 263 OS=Homo sapiens OX=9606 GN=TMEM263 PE=1 SV=1	0	41.692	66	5	7	5	1	116	11.7	9.32	27.79	5	0	88.2	102.2	91	96.4	90.3	101.9	Not Found	Not Found	High	Not Found	Not Found	Not Found	High	High	Not Found
FALSE	High	Master Protein	O95571	Persulfide dioxygenase ETHE1, mitochondrial OS=Homo sapiens OX=9606 GN=ETHE1 PE=1 SV=2	0	41.686	36	7	9	7	1	254	27.9	6.83	33.03	7	0	112.1	102.9	107.7	99.4	100.3	86.9	Not Found	High	High	High	High	High	High	Not Found	Not Found
FALSE	High	Master Protein	Q96C36	Pyrroline-5-carboxylate reductase 2 OS=Homo sapiens OX=9606 GN=PYCR2 PE=1 SV=1	0	41.655	28	8	9	7	1	320	33.6	7.77	29.79	8	1	105.7	100.5	102.4	98.4	105.1	92	Not Found	Not Found	High	Not Found	Not Found	Not Found	High	High	Not Found
FALSE	High	Master Protein	P08134	Rho-related GTP-binding protein RhoC OS=Homo sapiens OX=9606 GN=RHOC PE=1 SV=1	0	41.627	45	6	18	2	1	193	22	6.58	62.67	6	0	91	105.9	94.2	109.2	104.5	89.6	Not Found	Not Found	Not Found	Not Found	High	Not Found	High	Not Found	Not Found
FALSE	High	Master Protein	Q53EP0	Fibronectin type III domain-containing protein 3B OS=Homo sapiens OX=9606 GN=FNDC3B PE=1 SV=2	0	41.595	7	7	11	7	1	1204	132.8	5.95	42.61	7	0	107.6	96.7	100.8	98	101.6	124.9	Not Found	High	High	High	High	High	High	High	Not Found
FALSE	High	Master Protein	P18065	Insulin-like growth factor-binding protein 2 OS=Homo sapiens OX=9606 GN=IGFBP2 PE=1 SV=2	0	41.581	27	7	12	7	1	325	34.8	7.5	43.82	7	0	94.3	90.9	94.4	93.8	104.6	141.8	Not Found	High	High	High	High	High	High	Not Found	Not Found
FALSE	High	Master Protein	Q7L0Y3	tRNA methyltransferase 10 homolog C OS=Homo sapiens OX=9606 GN=TRMT10C PE=1 SV=2	0	41.53	21	7	8	7	1	403	47.3	9.36	26.16	7	0	111.1	99.8	102.1	95.7	103.3	83.5	Not Found	High	High	High	Not Found	High	High	Not Found	Not Found
FALSE	High	Master Protein	P50479	PDZ and LIM domain protein 4 OS=Homo sapiens OX=9606 GN=PDLIM4 PE=1 SV=2	0	41.521	25	8	16	8	1	330	35.4	7.91	52.6	8	0	100.1	102.7	96.6	102.3	98.6	101.8	Not Found	High	High	High	High	High	High	High	Not Found
FALSE	High	Master Protein	Q9UI42	Carboxypeptidase A4 OS=Homo sapiens OX=9606 GN=CPA4 PE=1 SV=2	0	41.51	33	9	13	9	1	421	47.3	6.7	50.28	9	0	100.8	95.1	100.8	102.3	110.6	111.8	Not Found	Not Found	High	High	High	Not Found	High	High	Not Found
FALSE	High	Master Protein	Q9P2R7	Succinate--CoA ligase [ADP-forming] subunit beta, mitochondrial OS=Homo sapiens OX=9606 GN=SUCLA2 PE=1 SV=3	0	41.412	23	9	16	9	1	463	50.3	7.42	50.48	9	0	104.4	94.8	96.9	93.1	109.7	115.9	Not Found	High	High	High	High	High	High	Not Found	Not Found
FALSE	High	Master Protein	P41227	N-alpha-acetyltransferase 10 OS=Homo sapiens OX=9606 GN=NAA10 PE=1 SV=1	0	41.405	42	8	13	8	1	235	26.4	5.64	45.61	8	0	97.3	95	96.9	94.6	95	111.7	Not Found	High	High	High	Not Found	High	Not Found	High	Not Found
FALSE	High	Master Protein	O95292	Vesicle-associated membrane protein-associated protein B/C OS=Homo sapiens OX=9606 GN=VAPB PE=1 SV=3	0	41.182	33	8	10	7	1	243	27.2	7.3	36.08	8	0	107.6	98.2	102.6	102.8	103.3	94.7	Not Found	Not Found	High	Not Found	High	Not Found	High	High	Not Found
FALSE	High	Master Protein	P61088	Ubiquitin-conjugating enzyme E2 N OS=Homo sapiens OX=9606 GN=UBE2N PE=1 SV=1	0	41.144	59	9	13	9	1	152	17.1	6.57	42.16	9	0	93.8	96.3	94.2	104.6	96	101.6	High	High	Not Found	Not Found	High	High	High	High	High
FALSE	High	Master Protein	O15027	Protein transport protein Sec16A OS=Homo sapiens OX=9606 GN=SEC16A PE=1 SV=4	0	41.132	4	8	12	8	1	2357	251.7	5.8	35.16	8	0	98.8	102.5	98.4	105.5	97	91.8	Not Found	High	High	High	Not Found	High	High	High	Not Found
FALSE	High	Master Protein	P10644	cAMP-dependent protein kinase type I-alpha regulatory subunit OS=Homo sapiens OX=9606 GN=PRKAR1A PE=1 SV=1	0	41.043	27	9	11	9	1	381	43	5.35	36.6	9	0	99.7	103	97.8	102.5	97.8	97.5	High	High	Not Found	High	Not Found	High	High	Not Found	Not Found
FALSE	High	Master Protein	P10619	Lysosomal protective protein OS=Homo sapiens OX=9606 GN=CTSA PE=1 SV=2	0	40.964	16	8	13	8	1	480	54.4	6.61	39.55	8	0	107.4	97.8	104.7	97.2	109.2	85.3	Not Found	Not Found	High	High	High	High	High	High	Not Found
FALSE	High	Master Protein	P50213	Isocitrate dehydrogenase [NAD] subunit alpha, mitochondrial OS=Homo sapiens OX=9606 GN=IDH3A PE=1 SV=1	0	40.928	23	7	9	7	1	366	39.6	6.92	30.48	7	0	102.3	97.5	97.5	95.9	104.7	106.5	Not Found	High	Not Found	High	High	High	Not Found	High	Not Found
FALSE	High	Master Protein	O43854	EGF-like repeat and discoidin I-like domain-containing protein 3 OS=Homo sapiens OX=9606 GN=EDIL3 PE=1 SV=1	0	40.585	20	9	14	9	1	480	53.7	7.28	43.32	9	0	102.6	93.2	100.1	90.6	105.2	115.2	High	Not Found	High	High	Not Found	High	High	High	Not Found
FALSE	High	Master Protein	P53597	Succinate--CoA ligase [ADP/GDP-forming] subunit alpha, mitochondrial OS=Homo sapiens OX=9606 GN=SUCLG1 PE=1 SV=4	0	40.503	24	7	13	7	1	346	36.2	8.79	46.74	7	0	106	92	101.7	100.2	105.7	106	Not Found	Not Found	Not Found	Not Found	High	High	High	High	Not Found
FALSE	High	Master Protein	Q16706	Alpha-mannosidase 2 OS=Homo sapiens OX=9606 GN=MAN2A1 PE=1 SV=2	0	40.475	9	8	11	8	1	1144	131.1	7.58	33.36	8	0	103.8	105.6	100.3	103.6	99.7	102.2	Not Found	Not Found	High	High	High	High	High	Not Found	Not Found
FALSE	High	Master Protein	P29144	Tripeptidyl-peptidase 2 OS=Homo sapiens OX=9606 GN=TPP2 PE=1 SV=4	0	40.434	11	11	13	11	1	1249	138.3	6.32	36.13	11	0	93.9	97.8	92.1	100.9	100.4	112.9	High	Not Found	High	High	High	High	High	Not Found	Not Found
FALSE	High	Master Protein	O43396	Thioredoxin-like protein 1 OS=Homo sapiens OX=9606 GN=TXNL1 PE=1 SV=3	0	40.402	28	6	10	6	1	289	32.2	4.96	30.66	6	0	95.2	96.8	100.8	101.9	93.7	104.3	High	High	High	Not Found	High	Not Found	High	High	Not Found
FALSE	High	Master Protein	O43432	Eukaryotic translation initiation factor 4 gamma 3 OS=Homo sapiens OX=9606 GN=EIF4G3 PE=1 SV=2	0	40.394	6	9	12	6	1	1585	176.5	5.38	34.44	9	0	99.7	112.9	96.3	96.8	94.3	96	High	High	High	High	Not Found	Not Found	Not Found	Not Found	Not Found
FALSE	High	Master Protein	O75489	NADH dehydrogenase [ubiquinone] iron-sulfur protein 3, mitochondrial OS=Homo sapiens OX=9606 GN=NDUFS3 PE=1 SV=1	0	40.319	27	5	6	5	1	264	30.2	7.5	23.96	5	0	98	93.4	95.3	90.5	111.1	125	Not Found	Not Found	High	High	High	High	Not Found	Not Found	Not Found
FALSE	High	Master Protein	Q6UVK1	Chondroitin sulfate proteoglycan 4 OS=Homo sapiens OX=9606 GN=CSPG4 PE=1 SV=2	0	40.311	4	5	6	5	1	2322	250.4	5.47	23.44	5	0	91.1	87.8	90.1	91.8	102.8	173.3	High	High	High	Not Found	Not Found	Not Found	Not Found	Not Found	Not Found
FALSE	High	Master Protein	Q9HAV7	GrpE protein homolog 1, mitochondrial OS=Homo sapiens OX=9606 GN=GRPEL1 PE=1 SV=2	0	40.283	29	5	13	5	1	217	24.3	8.12	44.85	5	0	101.5	101.2	97.9	94.8	101.8	112.7	Not Found	High	High	High	High	Not Found	Not Found	Not Found	Not Found
FALSE	High	Master Protein	P49585	Choline-phosphate cytidylyltransferase A OS=Homo sapiens OX=9606 GN=PCYT1A PE=1 SV=2	0	40.277	31	10	12	10	1	367	41.7	7.25	38.93	10	0	97.8	96	101	95.3	97.5	116.6	Not Found	High	High	High	Not Found	High	Not Found	High	Not Found
FALSE	High	Master Protein	Q8NHP8	Putative phospholipase B-like 2 OS=Homo sapiens OX=9606 GN=PLBD2 PE=1 SV=2	0	40.265	17	9	12	9	1	589	65.4	6.8	34.85	9	0	101.4	99.2	101.9	96.6	103.7	98.6	High	High	High	Not Found	High	Not Found	High	High	Not Found
FALSE	High	Master Protein	P62847	40S ribosomal protein S24 OS=Homo sapiens OX=9606 GN=RPS24 PE=1 SV=1	0	40.26	30	5	12	5	1	133	15.4	10.78	35.33	5	0	101.6	106.3	104.8	105.3	96.9	73.5	Not Found	Not Found	Not Found	Not Found	High	High	High	High	Not Found
FALSE	High	Master Protein	Q9H2D6	TRIO and F-actin-binding protein OS=Homo sapiens OX=9606 GN=TRIOBP PE=1 SV=3	0	40.246	4	8	9	8	1	2365	261.2	8.48	30.51	8	0	96.3	98.2	95.6	97.7	106	103.5	Not Found	High	High	High	High	High	Not Found	Not Found	Not Found
FALSE	High	Master Protein	Q9BXK5	Bcl-2-like protein 13 OS=Homo sapiens OX=9606 GN=BCL2L13 PE=1 SV=1	0	40.149	21	7	8	7	1	485	52.7	4.44	30.55	7	0	107.7	107.3	102.5	89.1	99.8	106.3	Not Found	High	High	High	High	Not Found	Not Found	Not Found	Not Found
FALSE	High	Master Protein	P08559	Pyruvate dehydrogenase E1 component subunit alpha, somatic form, mitochondrial OS=Homo sapiens OX=9606 GN=PDHA1 PE=1 SV=3	0	40.105	25	9	11	9	1	390	43.3	8.06	37.71	9	0	103.7	98.4	99.7	93.8	105.4	111	Not Found	High	Not Found	High	High	High	High	High	Not Found
FALSE	High	Master Protein	Q9Y2X3	Nucleolar protein 58 OS=Homo sapiens OX=9606 GN=NOP58 PE=1 SV=1	0	40.083	22	9	10	9	1	529	59.5	8.92	32.76	9	0	102.8	101.8	101.5	93.2	98.9	109	Not Found	High	High	High	Not Found	High	High	Not Found	Not Found
FALSE	High	Master Protein	Q15819	Ubiquitin-conjugating enzyme E2 variant 2 OS=Homo sapiens OX=9606 GN=UBE2V2 PE=1 SV=4	0	40.034	50	6	13	1	1	145	16.4	8.09	43.66	6	0	89.2	106.1	100	109.7	97.9	102.2	Not Found	Not Found	Not Found	Not Found	High	Not Found	Not Found	Not Found	Not Found
FALSE	High	Master Protein	Q9UNE7	E3 ubiquitin-protein ligase CHIP OS=Homo sapiens OX=9606 GN=STUB1 PE=1 SV=2	0	39.98	30	8	8	8	1	303	34.8	5.87	28.29	8	0	95.7	94.1	96.6	97.9	98.8	114.5	Not Found	Not Found	High	High	High	Not Found	High	Not Found	Not Found
FALSE	High	Master Protein	Q7Z417	Nuclear fragile X mental retardation-interacting protein 2 OS=Homo sapiens OX=9606 GN=NUFIP2 PE=1 SV=1	0	39.979	13	6	8	6	1	695	76.1	8.7	26.56	6	0	101.6	103	102	92.4	96	96.9	Not Found	Not Found	High	High	High	High	Not Found	Not Found	Not Found
FALSE	High	Master Protein	Q96IZ0	PRKC apoptosis WT1 regulator protein OS=Homo sapiens OX=9606 GN=PAWR PE=1 SV=1	0	39.904	29	7	9	7	1	340	36.5	5.41	31.76	7	0	104.1	121.9	101.5	118.5	83.5	59.3	High	High	High	Not Found	High	Not Found	Not Found	Not Found	Not Found
FALSE	High	Master Protein	P29317	Ephrin type-A receptor 2 OS=Homo sapiens OX=9606 GN=EPHA2 PE=1 SV=2	0	39.889	10	7	8	6	1	976	108.2	6.23	30.24	7	1	111	110.4	107.8	106.9	103.8	80.9	Not Found	Not Found	High	High	High	Not Found	High	Not Found	Not Found
FALSE	High	Master Protein	Q5SSJ5	Heterochromatin protein 1-binding protein 3 OS=Homo sapiens OX=9606 GN=HP1BP3 PE=1 SV=1	0	39.869	18	11	17	11	1	553	61.2	9.67	50.47	11	0	97.7	95.3	101.1	97.3	97.4	106.6	Not Found	Not Found	High	High	High	High	High	High	Not Found
FALSE	High	Master Protein	Q96AG4	Leucine-rich repeat-containing protein 59 OS=Homo sapiens OX=9606 GN=LRRC59 PE=1 SV=1	0	39.758	30	8	11	8	1	307	34.9	9.57	34.66	8	0	114.3	103.9	114.1	104.1	103.8	82.9	Not Found	Not Found	High	High	High	High	Not Found	High	High
FALSE	High	Master Protein	Q99829	Copine-1 OS=Homo sapiens OX=9606 GN=CPNE1 PE=1 SV=1	0	39.729	15	7	10	7	1	537	59	5.83	33.53	7	0	93.9	101.3	95.5	109.3	99.4	90.4	Not Found	Not Found	Not Found	Not Found	High	High	High	High	Not Found
FALSE	High	Master Protein	P43304	Glycerol-3-phosphate dehydrogenase, mitochondrial OS=Homo sapiens OX=9606 GN=GPD2 PE=1 SV=3	0	39.712	13	10	11	10	1	727	80.8	7.69	32.24	10	0	105.7	102.3	102.2	99.9	101	92.3	High	High	High	Not Found	High	High	High	High	Not Found
FALSE	High	Master Protein	O60749	Sorting nexin-2 OS=Homo sapiens OX=9606 GN=SNX2 PE=1 SV=2	0	39.696	17	9	12	7	1	519	58.4	5.12	37.66	9	2	97.2	107	98.6	107.9	96.7	85.9	Not Found	High	High	High	Not Found	High	Not Found	High	Not Found
FALSE	High	Master Protein	Q9Y6E0	Serine/threonine-protein kinase 24 OS=Homo sapiens OX=9606 GN=STK24 PE=1 SV=1	0	39.658	24	9	10	8	1	443	49.3	5.69	32.52	9	1	98.7	101.3	99.3	103.8	97.5	94.3	Not Found	Not Found	High	High	Not Found	High	High	High	Not Found
FALSE	High	Master Protein	P63000	Ras-related C3 botulinum toxin substrate 1 OS=Homo sapiens OX=9606 GN=RAC1 PE=1 SV=1	0	39.633	28	6	24	3	1	192	21.4	8.5	73.66	6	2	99	95.9	94.7	103.4	104.8	117.8	Not Found	Not Found	Not Found	Not Found	Not Found	Not Found	High	High	Not Found
FALSE	High	Master Protein	P30048	Thioredoxin-dependent peroxide reductase, mitochondrial OS=Homo sapiens OX=9606 GN=PRDX3 PE=1 SV=3	0	39.618	31	7	24	7	1	256	27.7	7.78	78.9	7	0	109.5	102.1	105.5	96.6	104	94.9	Not Found	High	High	High	High	High	High	High	Not Found
FALSE	High	Master Protein	P62987	Ubiquitin-60S ribosomal protein L40 OS=Homo sapiens OX=9606 GN=UBA52 PE=1 SV=2	0	39.575	41	5	54	1	1	128	14.7	9.83	171.1	5	0	101.2	133.5	102.5	119.4	73.5	56.2	Not Found	Not Found	Not Found	Not Found	Not Found	High	High	Not Found	Not Found
FALSE	High	Master Protein	Q9HC35	Echinoderm microtubule-associated protein-like 4 OS=Homo sapiens OX=9606 GN=EML4 PE=1 SV=3	0	39.557	9	7	9	7	1	981	108.8	6.4	31.2	7	0	92.6	101.7	95.2	102	96.1	106.9	High	High	High	High	High	Not Found	Not Found	High	Not Found
FALSE	High	Master Protein	Q9NX40	OCIA domain-containing protein 1 OS=Homo sapiens OX=9606 GN=OCIAD1 PE=1 SV=1	0	39.537	37	8	10	8	1	245	27.6	7.49	30.21	8	0	103.1	99.2	101.8	95.8	100.7	103.1	Not Found	Not Found	High	High	High	High	High	High	Not Found
FALSE	High	Master Protein	P11177	Pyruvate dehydrogenase E1 component subunit beta, mitochondrial OS=Homo sapiens OX=9606 GN=PDHB PE=1 SV=3	0	39.516	30	9	12	9	1	359	39.2	6.65	41.69	9	0	109	99.8	104.9	98	107.2	93	Not Found	High	Not Found	Not Found	High	High	High	High	Not Found
FALSE	High	Master Protein	O60832	H/ACA ribonucleoprotein complex subunit DKC1 OS=Homo sapiens OX=9606 GN=DKC1 PE=1 SV=3	0	39.476	17	7	11	7	1	514	57.6	9.42	35.74	7	0	105.3	102.9	104.6	94.6	100.1	95.2	Not Found	Not Found	High	High	High	Not Found	Not Found	High	Not Found
FALSE	High	Master Protein	O14979	Heterogeneous nuclear ribonucleoprotein D-like OS=Homo sapiens OX=9606 GN=HNRNPDL PE=1 SV=3	0	39.394	23	8	11	6	1	420	46.4	9.57	37.34	8	0	100.6	98.8	102.7	97.7	97.4	86	Not Found	Not Found	Not Found	High	High	High	High	High	Not Found
FALSE	High	Master Protein	O95793	Double-stranded RNA-binding protein Staufen homolog 1 OS=Homo sapiens OX=9606 GN=STAU1 PE=1 SV=2	0	39.329	17	8	9	8	1	577	63.1	9.44	34.24	8	0	100	96.3	99.3	91.6	98.8	112.6	Not Found	High	Not Found	High	Not Found	Not Found	High	High	Not Found
FALSE	High	Master Protein	P61289	Proteasome activator complex subunit 3 OS=Homo sapiens OX=9606 GN=PSME3 PE=1 SV=1	0	39.292	34	9	13	9	1	254	29.5	5.95	45.26	9	0	100.6	99.4	101	93	98.5	106	Not Found	High	High	High	Not Found	High	Not Found	High	Not Found
FALSE	High	Master Protein	P17252	Protein kinase C alpha type OS=Homo sapiens OX=9606 GN=PRKCA PE=1 SV=4	0	39.242	14	10	13	10	1	672	76.7	7.05	35.89	10	0	100.6	97.7	98	98.7	105.2	103.5	Not Found	High	Not Found	High	Not Found	High	High	High	High
FALSE	High	Master Protein	Q9NZV1	Cysteine-rich motor neuron 1 protein OS=Homo sapiens OX=9606 GN=CRIM1 PE=1 SV=1	0	39.213	12	10	10	10	1	1036	113.7	5.21	26.95	10	0	105.4	103.1	101.6	102.3	102.4	94.3	Not Found	High	High	High	High	High	High	High	High
FALSE	High	Master Protein	Q6VY07	Phosphofurin acidic cluster sorting protein 1 OS=Homo sapiens OX=9606 GN=PACS1 PE=1 SV=2	0	39.212	10	7	8	7	1	963	104.8	7.74	27.76	7	0	90.8	98.2	89.4	98.9	97.8	120.7	Not Found	High	High	High	High	Not Found	Not Found	High	Not Found
FALSE	High	Master Protein	O43150	Arf-GAP with SH3 domain, ANK repeat and PH domain-containing protein 2 OS=Homo sapiens OX=9606 GN=ASAP2 PE=1 SV=3	0	39.142	11	7	7	7	1	1006	111.6	6.68	25.65	7	0	99.4	105.4	100.3	102.6	98.4	91.1	Not Found	High	Not Found	High	High	Not Found	High	Not Found	Not Found
FALSE	High	Master Protein	P55809	Succinyl-CoA:3-ketoacid coenzyme A transferase 1, mitochondrial OS=Homo sapiens OX=9606 GN=OXCT1 PE=1 SV=1	0	39.13	22	10	17	10	1	520	56.1	7.46	45.85	10	0	102.5	101.8	97.1	102.2	104.6	95	Not Found	Not Found	High	Not Found	High	High	High	High	Not Found
FALSE	High	Master Protein	P25787	Proteasome subunit alpha type-2 OS=Homo sapiens OX=9606 GN=PSMA2 PE=1 SV=2	0	39.118	37	6	14	6	1	234	25.9	7.43	55.07	6	0	93.4	100.9	99.7	98.4	100.9	104.7	Not Found	Not Found	High	Not Found	High	High	Not Found	High	Not Found
FALSE	High	Master Protein	P04062	Lysosomal acid glucosylceramidase OS=Homo sapiens OX=9606 GN=GBA PE=1 SV=3	0	39.109	17	10	12	10	1	536	59.7	7.61	38.2	10	0	99.1	92.4	99.3	95.8	105.4	115.6	Not Found	Not Found	High	High	High	High	Not Found	High	Not Found
FALSE	High	Master Protein	Q15599	Na(+)/H(+) exchange regulatory cofactor NHE-RF2 OS=Homo sapiens OX=9606 GN=SLC9A3R2 PE=1 SV=2	0	39.055	27	7	9	7	1	337	37.4	7.93	29.06	7	0	101.4	100.8	96.8	98.2	98.4	113.5	Not Found	High	High	High	Not Found	Not Found	High	Not Found	Not Found
FALSE	High	Master Protein	P10599	Thioredoxin OS=Homo sapiens OX=9606 GN=TXN PE=1 SV=3	0	39.032	74	7	25	7	1	105	11.7	4.92	59.54	7	0	96.4	117.9	105	108.4	87	67	Not Found	Not Found	High	High	High	High	High	High	Not Found
FALSE	High	Master Protein	O75874	Isocitrate dehydrogenase [NADP] cytoplasmic OS=Homo sapiens OX=9606 GN=IDH1 PE=1 SV=2	0	39.027	24	8	9	7	1	414	46.6	7.01	28.81	8	0	93.1	103.3	96.9	101.5	95.9	100.9	Not Found	High	High	High	High	High	Not Found	High	Not Found
FALSE	High	Master Protein	Q14914	Prostaglandin reductase 1 OS=Homo sapiens OX=9606 GN=PTGR1 PE=1 SV=2	0	38.947	24	7	10	7	1	329	35.8	8.29	37.32	7	0	93.3	100.7	94.1	113.5	100.9	90.7	Not Found	Not Found	Not Found	High	High	High	High	High	Not Found
FALSE	High	Master Protein	P78417	Glutathione S-transferase omega-1 OS=Homo sapiens OX=9606 GN=GSTO1 PE=1 SV=2	0	38.941	44	12	17	12	1	241	27.5	6.6	56.49	12	0	89	95.2	96.4	100.3	96.8	99.5	Not Found	Not Found	High	High	High	High	High	High	Not Found
FALSE	High	Master Protein	P62081	40S ribosomal protein S7 OS=Homo sapiens OX=9606 GN=RPS7 PE=1 SV=1	0	38.882	53	8	23	8	1	194	22.1	10.1	71.12	8	0	100.6	97.6	104.5	97.4	99.8	95.7	High	High	Not Found	High	High	High	High	High	Not Found
FALSE	High	Master Protein	Q13185	Chromobox protein homolog 3 OS=Homo sapiens OX=9606 GN=CBX3 PE=1 SV=4	0	38.811	34	7	12	6	1	183	20.8	5.33	38.6	7	1	99.2	99.1	103.1	100.3	98.5	99.3	Not Found	High	High	High	Not Found	High	Not Found	Not Found	Not Found
FALSE	High	Master Protein	Q9Y617	Phosphoserine aminotransferase OS=Homo sapiens OX=9606 GN=PSAT1 PE=1 SV=2	0	38.8	21	7	10	7	1	370	40.4	7.66	32.99	7	0	98.9	100.4	97.9	100.9	97.5	87.5	Not Found	Not Found	Not Found	High	High	High	High	High	Not Found
FALSE	High	Master Protein	Q96CV9	Optineurin OS=Homo sapiens OX=9606 GN=OPTN PE=1 SV=3	0	38.748	14	7	7	7	1	577	65.9	5.17	27.75	7	0	89.9	100.9	97	100.7	98.1	101.4	Not Found	High	High	Not Found	Not Found	High	High	High	Not Found
FALSE	High	Master Protein	Q8IVM0	Coiled-coil domain-containing protein 50 OS=Homo sapiens OX=9606 GN=CCDC50 PE=1 SV=1	0	38.71	23	7	9	7	1	306	35.8	6.65	24.67	7	0	97.4	102	102.2	102.1	95	99.4	High	High	High	High	Not Found	Not Found	Not Found	Not Found	Not Found
FALSE	High	Master Protein	P68036	Ubiquitin-conjugating enzyme E2 L3 OS=Homo sapiens OX=9606 GN=UBE2L3 PE=1 SV=1	0	38.644	56	8	11	7	1	154	17.9	8.51	36.35	8	0	87.3	96.6	97.7	105.3	98.5	101.6	Not Found	Not Found	High	High	Not Found	Not Found	High	High	Not Found
FALSE	High	Master Protein	Q13596	Sorting nexin-1 OS=Homo sapiens OX=9606 GN=SNX1 PE=1 SV=3	0	38.593	12	6	8	4	1	522	59	5.15	27.09	6	0	98.1	106.6	92.6	102.2	93.9	93.5	High	High	High	Not Found	Not Found	High	High	Not Found	Not Found
FALSE	High	Master Protein	Q9Y3B3	Transmembrane emp24 domain-containing protein 7 OS=Homo sapiens OX=9606 GN=TMED7 PE=1 SV=2	0	38.55	30	7	13	7	1	224	25.2	6.89	48.95	7	0	104.8	96.9	99.3	97.8	109.5	99.6	High	High	High	Not Found	High	High	High	Not Found	Not Found
FALSE	High	Master Protein	P61353	60S ribosomal protein L27 OS=Homo sapiens OX=9606 GN=RPL27 PE=1 SV=2	0	38.533	53	8	21	8	1	136	15.8	10.56	68.39	8	0	100.9	96	103.6	98.3	96.8	106.1	Not Found	Not Found	High	High	High	High	High	High	Not Found
FALSE	High	Master Protein	P63167	Dynein light chain 1, cytoplasmic OS=Homo sapiens OX=9606 GN=DYNLL1 PE=1 SV=1	0	38.509	45	3	13	2	1	89	10.4	7.4	54.9	3	1	100.9	110.6	101.5	108.3	97.4	73.5	Not Found	High	High	Not Found	High	High	Not Found	Not Found	Not Found
FALSE	High	Master Protein	Q9UHG3	Prenylcysteine oxidase 1 OS=Homo sapiens OX=9606 GN=PCYOX1 PE=1 SV=3	0	38.464	23	9	9	9	1	505	56.6	6.18	32.45	9	0	100.7	97.4	99	95.9	110.5	98.9	Not Found	Not Found	Not Found	High	High	High	High	High	Not Found
FALSE	High	Master Protein	Q14141	Septin-6 OS=Homo sapiens OX=9606 GN=SEPTIN6 PE=1 SV=4	0	38.408	23	8	12	1	1	434	49.7	6.67	39.53	8	0	120.2	90.6	110	81.4	108.2	79.4	Not Found	Not Found	High	Not Found	Not Found	Not Found	Not Found	Not Found	Not Found
FALSE	High	Master Protein	P62277	40S ribosomal protein S13 OS=Homo sapiens OX=9606 GN=RPS13 PE=1 SV=2	0	38.378	52	9	24	9	1	151	17.2	10.54	69.78	9	0	102.6	97.2	101.6	91.4	100.2	104.7	Not Found	High	High	High	High	High	High	High	Not Found
FALSE	High	Master Protein	O95819	Mitogen-activated protein kinase kinase kinase kinase 4 OS=Homo sapiens OX=9606 GN=MAP4K4 PE=1 SV=2	0	38.352	8	7	8	4	1	1239	142	7.46	26.81	7	3	95.3	100.9	91.9	99.5	97.3	109.5	Not Found	High	Not Found	High	High	Not Found	Not Found	Not Found	Not Found
FALSE	High	Master Protein	Q14151	Scaffold attachment factor B2 OS=Homo sapiens OX=9606 GN=SAFB2 PE=1 SV=1	0	38.313	10	6	8	3	1	953	107.4	6.16	33.6	6	0	106.2	105	102.7	101.3	102.3	82.6	Not Found	High	Not Found	High	Not Found	Not Found	Not Found	Not Found	Not Found
FALSE	High	Master Protein	Q13247	Serine/arginine-rich splicing factor 6 OS=Homo sapiens OX=9606 GN=SRSF6 PE=1 SV=2	0	38.274	30	11	16	5	1	344	39.6	11.43	46.14	11	6	101.1	95.8	103.5	95.8	98.2	105.2	Not Found	High	High	Not Found	High	High	Not Found	Not Found	Not Found
FALSE	High	Master Protein	P14550	Aldo-keto reductase family 1 member A1 OS=Homo sapiens OX=9606 GN=AKR1A1 PE=1 SV=3	0	38.258	29	8	12	7	1	325	36.6	6.79	44.78	8	0	92	98.5	95.9	99	98.3	105.6	Not Found	Not Found	High	High	Not Found	High	High	High	Not Found
FALSE	High	Master Protein	O43865	S-adenosylhomocysteine hydrolase-like protein 1 OS=Homo sapiens OX=9606 GN=AHCYL1 PE=1 SV=2	0	38.098	20	9	10	8	1	530	58.9	6.89	32.25	9	0	97.6	101.4	94.3	106.6	100.7	97	Not Found	Not Found	High	High	High	High	Not Found	High	Not Found
FALSE	High	Master Protein	Q9UBB4	Ataxin-10 OS=Homo sapiens OX=9606 GN=ATXN10 PE=1 SV=1	0	38.086	16	6	6	6	1	475	53.5	5.25	24.08	6	0	91.1	100.6	96.3	97.3	95.4	106.1	Not Found	Not Found	Not Found	High	High	Not Found	High	High	Not Found
FALSE	High	Master Protein	P35080	Profilin-2 OS=Homo sapiens OX=9606 GN=PFN2 PE=1 SV=3	0	38.032	36	4	13	4	1	140	15	6.99	48.62	4	0	95.5	98.3	95.3	101.9	95.4	113.2	Not Found	High	High	High	Not Found	Not Found	High	Not Found	Not Found
FALSE	High	Master Protein	P46778	60S ribosomal protein L21 OS=Homo sapiens OX=9606 GN=RPL21 PE=1 SV=2	0	37.954	37	7	23	7	1	160	18.6	10.49	65.35	7	0	99.8	100.6	103.1	96.4	97	97.3	Not Found	High	High	High	High	High	High	High	Not Found
FALSE	High	Master Protein	Q02818	Nucleobindin-1 OS=Homo sapiens OX=9606 GN=NUCB1 PE=1 SV=4	0	37.939	19	7	8	7	1	461	53.8	5.25	29.66	7	0	121.3	113.3	121	87.9	93.7	94.5	Not Found	High	High	High	Not Found	High	High	Not Found	Not Found
FALSE	High	Master Protein	P63096	Guanine nucleotide-binding protein G(i) subunit alpha-1 OS=Homo sapiens OX=9606 GN=GNAI1 PE=1 SV=2	0	37.909	24	7	9	1	1	354	40.3	5.97	32.27	7	0	97.9	94.7	88.6	79.5	104.2	167.6	Not Found	Not Found	High	Not Found	Not Found	Not Found	Not Found	Not Found	Not Found
FALSE	High	Master Protein	Q96N67	Dedicator of cytokinesis protein 7 OS=Homo sapiens OX=9606 GN=DOCK7 PE=1 SV=4	0	37.899	6	11	13	11	1	2140	242.4	6.8	36.94	11	0	97	102.2	94.5	106.9	102.6	97.4	Not Found	Not Found	High	High	High	High	Not Found	High	Not Found
FALSE	High	Master Protein	P50914	60S ribosomal protein L14 OS=Homo sapiens OX=9606 GN=RPL14 PE=1 SV=4	0	37.864	25	5	21	5	1	215	23.4	10.93	75.31	5	0	97.1	100	98.9	98.5	98.7	99.5	Not Found	Not Found	Not Found	High	High	High	High	High	Not Found
FALSE	High	Master Protein	Q8NBJ7	Inactive C-alpha-formylglycine-generating enzyme 2 OS=Homo sapiens OX=9606 GN=SUMF2 PE=1 SV=2	0	37.863	27	7	17	7	1	301	33.8	8	51.53	7	0	103.4	100.5	101.5	99.8	101.2	95.6	Not Found	High	Not Found	High	High	High	High	High	Not Found
FALSE	High	Master Protein	Q9NY33	Dipeptidyl peptidase 3 OS=Homo sapiens OX=9606 GN=DPP3 PE=1 SV=2	0	37.857	15	10	10	10	1	737	82.5	5.1	33.05	10	0	92.6	96.6	93.6	103.1	97.2	109.9	Not Found	High	High	High	High	High	Not Found	High	Not Found
FALSE	High	Master Protein	P17174	Aspartate aminotransferase, cytoplasmic OS=Homo sapiens OX=9606 GN=GOT1 PE=1 SV=3	0	37.843	23	9	12	9	1	413	46.2	7.01	35.41	9	0	96.7	99.9	98.7	103.6	98.3	92.6	Not Found	Not Found	Not Found	High	High	High	High	High	Not Found
FALSE	High	Master Protein	Q9Y295	Developmentally-regulated GTP-binding protein 1 OS=Homo sapiens OX=9606 GN=DRG1 PE=1 SV=1	0	37.694	23	7	8	7	1	367	40.5	8.9	26.6	7	0	99	99.3	102.1	99.1	97.3	96.4	Not Found	High	High	High	Not Found	High	High	High	Not Found
FALSE	High	Master Protein	Q9Y2Z0	Protein SGT1 homolog OS=Homo sapiens OX=9606 GN=SUGT1 PE=1 SV=3	0	37.669	26	8	14	8	1	365	41	5.16	45.21	8	0	96.4	104.6	96.1	99.6	97.9	95.1	Not Found	Not Found	High	High	High	High	High	Not Found	Not Found
FALSE	High	Master Protein	P09661	U2 small nuclear ribonucleoprotein A' OS=Homo sapiens OX=9606 GN=SNRPA1 PE=1 SV=2	0	37.652	29	6	8	6	1	255	28.4	8.62	25.09	6	0	104.1	100	98.4	93.3	104.5	107	Not Found	Not Found	High	High	Not Found	High	High	High	Not Found
FALSE	High	Master Protein	Q68CZ2	Tensin-3 OS=Homo sapiens OX=9606 GN=TNS3 PE=1 SV=2	0	37.597	9	10	12	8	1	1445	155.2	6.81	34.57	10	0	93.4	94.3	94.5	94.4	97.9	123.2	Not Found	Not Found	High	High	Not Found	High	High	High	Not Found
FALSE	High	Master Protein	Q5T1M5	FK506-binding protein 15 OS=Homo sapiens OX=9606 GN=FKBP15 PE=1 SV=2	0	37.571	5	5	7	5	1	1219	133.5	5.2	27.05	5	0	96.5	100.4	99.7	98.6	97.2	106.1	High	High	Not Found	Not Found	Not Found	High	High	Not Found	Not Found
FALSE	High	Master Protein	P61513	60S ribosomal protein L37a OS=Homo sapiens OX=9606 GN=RPL37A PE=1 SV=2	0	37.457	59	6	24	6	1	92	10.3	10.43	66.86	6	0	96.7	93.8	100.6	98.3	100.6	107.9	Not Found	Not Found	Not Found	Not Found	High	High	High	High	Not Found
FALSE	High	Master Protein	Q86XP3	ATP-dependent RNA helicase DDX42 OS=Homo sapiens OX=9606 GN=DDX42 PE=1 SV=1	0	37.453	12	9	12	9	1	938	102.9	7.02	47.39	9	0	94.9	94.3	105.2	96.6	101.6	105.5	Not Found	Not Found	High	High	High	High	High	High	Not Found
FALSE	High	Master Protein	Q9H488	GDP-fucose protein O-fucosyltransferase 1 OS=Homo sapiens OX=9606 GN=POFUT1 PE=1 SV=1	0	37.431	29	8	8	8	1	388	43.9	8.53	27.54	8	0	96.7	99.1	94.9	100.6	104.4	111.8	Not Found	Not Found	Not Found	Not Found	High	High	High	High	Not Found
FALSE	High	Master Protein	P45974	Ubiquitin carboxyl-terminal hydrolase 5 OS=Homo sapiens OX=9606 GN=USP5 PE=1 SV=2	0	37.346	12	9	10	9	1	858	95.7	5.03	33.45	9	0	93.3	94.7	95	102.6	97.6	108.9	Not Found	High	High	High	High	High	Not Found	Not Found	Not Found
FALSE	High	Master Protein	P55735	Protein SEC13 homolog OS=Homo sapiens OX=9606 GN=SEC13 PE=1 SV=3	0	37.336	30	7	14	7	1	322	35.5	5.48	45.39	7	0	99.8	104.8	99.1	104.5	94.7	85.8	Not Found	High	High	High	High	High	High	Not Found	Not Found
FALSE	High	Master Protein	P52565	Rho GDP-dissociation inhibitor 1 OS=Homo sapiens OX=9606 GN=ARHGDIA PE=1 SV=3	0	37.268	29	7	19	7	1	204	23.2	5.11	68.64	7	0	92.3	104.5	98	108.1	93.2	83.8	Not Found	High	High	High	High	High	High	Not Found	Not Found
FALSE	High	Master Protein	Q96PD2	Discoidin, CUB and LCCL domain-containing protein 2 OS=Homo sapiens OX=9606 GN=DCBLD2 PE=1 SV=1	0	37.242	16	9	14	9	1	775	85	7.17	42.69	9	0	108	106.7	102.2	101.2	99.7	94.2	Not Found	High	High	High	Not Found	High	High	High	Not Found
FALSE	High	Master Protein	P23921	Ribonucleoside-diphosphate reductase large subunit OS=Homo sapiens OX=9606 GN=RRM1 PE=1 SV=1	0	37.237	9	7	9	7	1	792	90	7.15	32.84	7	0	94.5	97.3	98.2	102.4	97.9	98.6	Not Found	Not Found	High	Not Found	Not Found	High	High	High	Not Found
FALSE	High	Master Protein	O95747	Serine/threonine-protein kinase OSR1 OS=Homo sapiens OX=9606 GN=OXSR1 PE=1 SV=1	0	37.234	16	7	8	6	1	527	58	6.43	25	7	0	92.9	95	96.3	102.3	94.6	116.6	Not Found	Not Found	High	High	High	Not Found	Not Found	High	Not Found
FALSE	High	Master Protein	P84098	60S ribosomal protein L19 OS=Homo sapiens OX=9606 GN=RPL19 PE=1 SV=1	0	37.134	26	6	23	6	1	196	23.5	11.47	59.44	6	0	100	93.8	99.6	92.5	100.4	116.8	Not Found	Not Found	High	High	High	High	High	High	Not Found
FALSE	High	Master Protein	Q9NVD7	Alpha-parvin OS=Homo sapiens OX=9606 GN=PARVA PE=1 SV=1	0	37.057	22	7	10	7	1	372	42.2	5.95	29.56	7	0	97.6	100.4	95.7	97.6	96.4	98.7	Not Found	High	High	High	High	Not Found	High	High	Not Found
FALSE	High	Master Protein	P26232	Catenin alpha-2 OS=Homo sapiens OX=9606 GN=CTNNA2 PE=1 SV=5	0	36.992	8	6	10	1	1	953	105.2	5.71	32.4	6	0	108.5	109.9	99.3	86.8	90.3	110.5	Not Found	Not Found	Not Found	Not Found	Not Found	Not Found	Not Found	High	Not Found
FALSE	High	Master Protein	P23368	NAD-dependent malic enzyme, mitochondrial OS=Homo sapiens OX=9606 GN=ME2 PE=1 SV=1	0	36.939	15	7	8	7	1	584	65.4	7.61	28.96	7	0	107.6	97.8	102.3	93.6	107.2	103.6	Not Found	High	High	High	Not Found	High	High	High	Not Found
FALSE	High	Master Protein	Q9NVP1	ATP-dependent RNA helicase DDX18 OS=Homo sapiens OX=9606 GN=DDX18 PE=1 SV=2	0	36.876	15	8	8	8	1	670	75.4	9.5	27.75	8	0	96.6	98.4	95.3	97.1	100.7	111.2	Not Found	Not Found	High	High	High	High	High	Not Found	Not Found
FALSE	High	Master Protein	Q9Y305	Acyl-coenzyme A thioesterase 9, mitochondrial OS=Homo sapiens OX=9606 GN=ACOT9 PE=1 SV=2	0	36.834	19	7	9	7	1	439	49.9	8.6	30.16	7	0	105.3	93	98.1	95.4	111.9	106.3	Not Found	High	Not Found	High	Not Found	High	High	High	Not Found
FALSE	High	Master Protein	O00622	CCN family member 1 OS=Homo sapiens OX=9606 GN=CCN1 PE=1 SV=1	0	36.802	23	8	9	8	1	381	42	8.21	28.43	8	0	99.9	101.4	101	104	106.2	101.4	Not Found	High	High	Not Found	Not Found	High	High	High	Not Found
FALSE	High	Master Protein	P40429	60S ribosomal protein L13a OS=Homo sapiens OX=9606 GN=RPL13A PE=1 SV=2	0	36.777	39	9	28	9	1	203	23.6	10.93	75.99	9	0	102.9	98.7	95.2	95.9	102.7	101.8	Not Found	High	High	High	High	High	High	High	Not Found
FALSE	High	Master Protein	Q96DZ1	Endoplasmic reticulum lectin 1 OS=Homo sapiens OX=9606 GN=ERLEC1 PE=1 SV=1	0	36.771	24	11	14	11	1	483	54.8	6.28	39.45	11	0	99.5	93.3	99.9	91.5	106.5	115.9	High	High	Not Found	High	High	High	Not Found	High	Not Found
FALSE	High	Master Protein	P24539	ATP synthase F(0) complex subunit B1, mitochondrial OS=Homo sapiens OX=9606 GN=ATP5PB PE=1 SV=2	0	36.742	24	6	9	6	1	256	28.9	9.36	33.15	6	0	131.4	99.5	95.5	100.8	111.6	86.5	Not Found	Not Found	Not Found	High	High	High	High	Not Found	Not Found
FALSE	High	Master Protein	O00567	Nucleolar protein 56 OS=Homo sapiens OX=9606 GN=NOP56 PE=1 SV=4	0	36.692	14	7	8	7	1	594	66	9.19	28.1	7	0	102	95.2	102.6	95.5	102	99.4	Not Found	High	Not Found	Not Found	Not Found	High	High	High	Not Found
FALSE	High	Master Protein	P07203	Glutathione peroxidase 1 OS=Homo sapiens OX=9606 GN=GPX1 PE=1 SV=4	0	36.624	33	5	9	5	1	203	22.1	6.55	30.95	5	0	100.2	100.9	99.1	100.7	100.7	99.4	Not Found	High	High	Not Found	High	Not Found	High	High	Not Found
FALSE	High	Master Protein	P13693	Translationally-controlled tumor protein OS=Homo sapiens OX=9606 GN=TPT1 PE=1 SV=1	0	36.576	36	6	15	6	1	172	19.6	4.93	52.25	6	0	90.1	102	98	107.2	92.7	80.5	High	High	High	High	High	Not Found	Not Found	High	Not Found
FALSE	High	Master Protein	P35268	60S ribosomal protein L22 OS=Homo sapiens OX=9606 GN=RPL22 PE=1 SV=2	0	36.54	55	5	15	5	1	128	14.8	9.19	56.39	5	0	98.6	96.3	100.4	94.5	102.6	109.9	High	High	Not Found	High	High	High	High	Not Found	Not Found
FALSE	High	Master Protein	Q99470	Stromal cell-derived factor 2 OS=Homo sapiens OX=9606 GN=SDF2 PE=1 SV=2	0	36.519	29	3	5	3	1	211	23	7.33	28.16	3	0	96.1	94.9	101.7	100.8	109.5	94.4	Not Found	Not Found	High	High	High	High	Not Found	Not Found	Not Found
FALSE	High	Master Protein	P51148	Ras-related protein Rab-5C OS=Homo sapiens OX=9606 GN=RAB5C PE=1 SV=2	0	36.465	43	7	10	5	1	216	23.5	8.41	35.96	7	2	113.1	106.3	97.7	101.9	103.4	89.9	Not Found	High	High	Not Found	High	Not Found	High	High	Not Found
FALSE	High	Master Protein	P61254	60S ribosomal protein L26 OS=Homo sapiens OX=9606 GN=RPL26 PE=1 SV=1	0	36.457	45	9	31	2	1	145	17.2	10.55	86.22	9	8	98.4	99.3	102	99.1	98.6	97.5	Not Found	Not Found	Not Found	High	High	High	High	Not Found	Not Found
FALSE	High	Master Protein	O75694	Nuclear pore complex protein Nup155 OS=Homo sapiens OX=9606 GN=NUP155 PE=1 SV=1	0	36.431	6	6	7	6	1	1391	155.1	6.16	26.46	6	0	96.9	98.8	98.7	94.7	104.8	107.4	Not Found	High	High	High	High	High	Not Found	High	Not Found
FALSE	High	Master Protein	O94808	Glutamine--fructose-6-phosphate aminotransferase [isomerizing] 2 OS=Homo sapiens OX=9606 GN=GFPT2 PE=1 SV=3	0	36.398	12	7	8	4	1	682	76.9	7.37	28.58	7	0	89.4	91.2	89.7	96.9	94.5	118.8	Not Found	High	High	Not Found	Not Found	Not Found	High	Not Found	Not Found
FALSE	High	Master Protein	O95980	Reversion-inducing cysteine-rich protein with Kazal motifs OS=Homo sapiens OX=9606 GN=RECK PE=1 SV=1	0	36.371	10	6	7	6	1	971	106.4	6.74	25.68	6	0	101.4	103.3	95.5	98.8	107	109.1	Not Found	High	High	High	High	Not Found	Not Found	High	Not Found
FALSE	High	Master Protein	Q96FW1	Ubiquitin thioesterase OTUB1 OS=Homo sapiens OX=9606 GN=OTUB1 PE=1 SV=2	0	36.359	34	6	9	6	1	271	31.3	4.94	32.72	6	0	94.7	96.4	97.8	99.8	104.2	109.4	Not Found	High	High	High	High	High	Not Found	Not Found	Not Found
FALSE	High	Master Protein	Q92520	Protein FAM3C OS=Homo sapiens OX=9606 GN=FAM3C PE=1 SV=1	0	36.31	37	8	12	8	1	227	24.7	8.29	35.07	8	0	112.5	106.8	110.6	99	100.1	95.6	Not Found	Not Found	High	High	Not Found	High	High	High	Not Found
FALSE	High	Master Protein	P30626	Sorcin OS=Homo sapiens OX=9606 GN=SRI PE=1 SV=1	0	36.297	45	7	10	7	1	198	21.7	5.59	32.18	7	0	89.4	100.6	93.1	109.3	95	101.6	Not Found	Not Found	Not Found	High	High	High	High	High	Not Found
FALSE	High	Master Protein	A0FGR8	Extended synaptotagmin-2 OS=Homo sapiens OX=9606 GN=ESYT2 PE=1 SV=1	0	36.29	10	7	8	7	1	921	102.3	9.26	27.96	7	0	102.9	98.1	99.1	99.1	108.1	111.7	Not Found	Not Found	High	High	High	High	High	High	Not Found
FALSE	High	Master Protein	P08779	Keratin, type I cytoskeletal 16 OS=Homo sapiens OX=9606 GN=KRT16 PE=1 SV=4	0	36.258	21	10	17	1	1	473	51.2	5.05	43.67	10	0							Not Found	High	Not Found	Not Found	Not Found	Not Found	Not Found	Not Found	Not Found
FALSE	High	Master Protein	Q9UDY2	Tight junction protein ZO-2 OS=Homo sapiens OX=9606 GN=TJP2 PE=1 SV=2	0	36.224	8	9	10	9	1	1190	133.9	7.4	32.34	9	0	94	97.2	96.8	100.1	96.3	106.7	Not Found	High	High	High	Not Found	Not Found	High	High	Not Found
FALSE	High	Master Protein	Q9BWF3	RNA-binding protein 4 OS=Homo sapiens OX=9606 GN=RBM4 PE=1 SV=1	0	36.216	24	7	10	7	1	364	40.3	7.08	28.69	7	0	98.2	93.7	95.4	88.5	100.4	129.6	High	High	High	High	Not Found	High	High	Not Found	High
FALSE	High	Master Protein	P30622	CAP-Gly domain-containing linker protein 1 OS=Homo sapiens OX=9606 GN=CLIP1 PE=1 SV=2	0	36.16	7	9	9	9	1	1438	162.1	5.36	28.86	9	0	96.7	101.8	97	95.2	97.3	112.3	Not Found	Not Found	High	High	Not Found	High	Not Found	Not Found	Not Found
FALSE	High	Master Protein	P40121	Macrophage-capping protein OS=Homo sapiens OX=9606 GN=CAPG PE=1 SV=2	0	36.15	22	7	9	7	1	348	38.5	6.19	27.73	7	0	93.2	100	91.6	105.8	101.5	102.8	Not Found	Not Found	Not Found	High	High	High	Not Found	High	Not Found
FALSE	High	Master Protein	P53634	Dipeptidyl peptidase 1 OS=Homo sapiens OX=9606 GN=CTSC PE=1 SV=2	0	36.146	16	6	8	6	1	463	51.8	6.99	30.9	6	0	103.4	102.5	103	95.2	102.1	95.9	Not Found	Not Found	Not Found	High	High	High	Not Found	High	Not Found
FALSE	High	Master Protein	P08240	Signal recognition particle receptor subunit alpha OS=Homo sapiens OX=9606 GN=SRPRA PE=1 SV=2	0	36.132	16	8	8	8	1	638	69.8	8.95	28.85	8	0	104.2	96	100.8	99.6	106.6	109.6	Not Found	Not Found	High	Not Found	High	High	High	High	Not Found
FALSE	High	Master Protein	Q00765	Receptor expression-enhancing protein 5 OS=Homo sapiens OX=9606 GN=REEP5 PE=1 SV=3	0	36.02	15	4	9	4	1	189	21.5	8.1	32.31	4	0	110	97.8	106.2	92.2	104.3	99.2	Not Found	Not Found	High	High	High	High	High	Not Found	Not Found
FALSE	High	Master Protein	P49756	RNA-binding protein 25 OS=Homo sapiens OX=9606 GN=RBM25 PE=1 SV=3	0	35.99	10	6	7	6	1	843	100.1	6.32	27.39	6	0	100	96.1	103.2	94	102.7	108.4	High	High	High	Not Found	High	Not Found	Not Found	Not Found	Not Found
FALSE	High	Master Protein	Q14019	Coactosin-like protein OS=Homo sapiens OX=9606 GN=COTL1 PE=1 SV=3	0	35.956	51	8	19	8	1	142	15.9	5.67	58.4	8	0	92.9	99.8	97.5	103.1	96	100.8	High	Not Found	High	High	High	High	Not Found	Not Found	Not Found
FALSE	High	Master Protein	P61916	NPC intracellular cholesterol transporter 2 OS=Homo sapiens OX=9606 GN=NPC2 PE=1 SV=1	0	35.91	44	6	12	6	1	151	16.6	7.65	46.5	6	0	105.6	102	108.3	94.3	99.4	85.3	Not Found	Not Found	High	Not Found	High	High	High	High	Not Found
FALSE	High	Master Protein	P10155	60 kDa SS-A/Ro ribonucleoprotein OS=Homo sapiens OX=9606 GN=RO60 PE=1 SV=2	0	35.883	17	10	12	10	1	538	60.6	8.03	34.98	10	0	96.5	98	99.1	94.6	99.2	111.1	Not Found	High	High	High	High	High	Not Found	High	Not Found
FALSE	High	Master Protein	Q9UN86	Ras GTPase-activating protein-binding protein 2 OS=Homo sapiens OX=9606 GN=G3BP2 PE=1 SV=2	0	35.806	20	7	9	7	1	482	54.1	5.55	27.6	7	0	108.3	108.7	105.3	99	90.8	72.5	Not Found	High	High	High	Not Found	Not Found	High	Not Found	Not Found
FALSE	High	Master Protein	Q15067	Peroxisomal acyl-coenzyme A oxidase 1 OS=Homo sapiens OX=9606 GN=ACOX1 PE=1 SV=3	0	35.803	19	9	10	9	1	660	74.4	8.16	35.04	9	0	101.7	96.6	97.5	98.4	109.1	103.3	Not Found	Not Found	High	High	High	High	High	High	Not Found
FALSE	High	Master Protein	Q9UL46	Proteasome activator complex subunit 2 OS=Homo sapiens OX=9606 GN=PSME2 PE=1 SV=4	0	35.717	24	6	9	6	1	239	27.4	5.73	35.84	6	0	96.4	104	95.3	106.4	97.6	88.8	High	Not Found	High	Not Found	High	High	High	High	Not Found
FALSE	High	Master Protein	Q96I24	Far upstream element-binding protein 3 OS=Homo sapiens OX=9606 GN=FUBP3 PE=1 SV=2	0	35.703	23	11	15	9	1	572	61.6	8.38	43.88	11	0	97.5	100.9	95.2	98.4	95.8	113	Not Found	High	High	High	High	High	High	High	Not Found
FALSE	High	Master Protein	Q15056	Eukaryotic translation initiation factor 4H OS=Homo sapiens OX=9606 GN=EIF4H PE=1 SV=5	0	35.675	32	6	8	6	1	248	27.4	7.23	28.31	6	0	91.6	97.3	91.1	102.3	94.8	122	Not Found	High	High	High	High	High	Not Found	Not Found	Not Found
FALSE	High	Master Protein	P61421	V-type proton ATPase subunit d 1 OS=Homo sapiens OX=9606 GN=ATP6V0D1 PE=1 SV=1	0	35.56	25	8	12	8	1	351	40.3	5	37.48	8	0	104.9	104.6	104.6	100.2	102.7	85.1	Not Found	High	Not Found	High	High	High	Not Found	Not Found	Not Found
FALSE	High	Master Protein	Q9Y281	Cofilin-2 OS=Homo sapiens OX=9606 GN=CFL2 PE=1 SV=1	0	35.514	37	5	18	2	1	166	18.7	7.88	47.72	5	0	100.5	104.5	100.4	105	98.2	94.5	Not Found	Not Found	Not Found	High	High	Not Found	Not Found	Not Found	Not Found
FALSE	High	Master Protein	P11234	Ras-related protein Ral-B OS=Homo sapiens OX=9606 GN=RALB PE=1 SV=1	0	35.486	31	4	9	1	1	206	23.4	6.62	26.46	4	0	100.5	72.8	88.7	78.1	106.2	184.8	Not Found	High	Not Found	Not Found	Not Found	Not Found	Not Found	Not Found	Not Found
FALSE	High	Master Protein	Q9UBE0	SUMO-activating enzyme subunit 1 OS=Homo sapiens OX=9606 GN=SAE1 PE=1 SV=1	0	35.462	25	8	12	8	1	346	38.4	5.3	34.33	8	0	101.5	102.3	102.9	98	97.1	99.1	High	High	High	High	High	High	Not Found	High	Not Found
FALSE	High	Master Protein	P49821	NADH dehydrogenase [ubiquinone] flavoprotein 1, mitochondrial OS=Homo sapiens OX=9606 GN=NDUFV1 PE=1 SV=4	0	35.397	12	4	8	4	1	464	50.8	8.21	31.18	4	0	103.5	92.3	99.5	97.5	109.8	113.6	Not Found	High	High	High	High	High	High	Not Found	Not Found
FALSE	High	Master Protein	P20339	Ras-related protein Rab-5A OS=Homo sapiens OX=9606 GN=RAB5A PE=1 SV=2	0	35.265	36	6	8	4	1	215	23.6	8.15	26.33	6	0	105	99.6	93.8	101.6	96.6	118.8	Not Found	High	High	High	Not Found	High	High	Not Found	Not Found
FALSE	High	Master Protein	Q9H3U1	Protein unc-45 homolog A OS=Homo sapiens OX=9606 GN=UNC45A PE=1 SV=1	0	35.154	9	8	9	8	1	944	103	6.07	27.4	8	0	100.5	104.3	100	103.4	95.1	88.3	Not Found	Not Found	High	High	High	High	Not Found	High	Not Found
FALSE	High	Master Protein	Q9BZF9	Uveal autoantigen with coiled-coil domains and ankyrin repeats OS=Homo sapiens OX=9606 GN=UACA PE=1 SV=2	0	35.142	7	9	9	9	1	1416	162.4	7.03	26.09	9	0	103.9	103.2	97.4	98.8	98.6	103.1	Not Found	High	High	High	High	Not Found	High	Not Found	Not Found
FALSE	High	Master Protein	O15382	Branched-chain-amino-acid aminotransferase, mitochondrial OS=Homo sapiens OX=9606 GN=BCAT2 PE=1 SV=2	0	35.133	17	5	8	5	1	392	44.3	8.65	31.95	5	0	99.3	92.4	99.2	93.5	105.6	119.5	Not Found	Not Found	Not Found	Not Found	Not Found	High	High	High	Not Found
FALSE	High	Master Protein	P20020	Plasma membrane calcium-transporting ATPase 1 OS=Homo sapiens OX=9606 GN=ATP2B1 PE=1 SV=4	0	35.067	10	9	9	3	1	1220	134.6	5.91	30.57	9	0	103.6	101	102.2	96.2	107.9	100.4	Not Found	High	Not Found	Not Found	High	Not Found	High	Not Found	Not Found
FALSE	High	Master Protein	Q86VS8	Protein Hook homolog 3 OS=Homo sapiens OX=9606 GN=HOOK3 PE=1 SV=2	0	35.005	12	7	9	7	1	718	83.1	5.17	26.46	7	0	99.6	103.5	101.9	102.1	96.8	100.6	Not Found	High	High	High	Not Found	Not Found	High	Not Found	Not Found
FALSE	High	Master Protein	Q00325	Phosphate carrier protein, mitochondrial OS=Homo sapiens OX=9606 GN=SLC25A3 PE=1 SV=2	0	34.915	21	8	19	8	1	362	40.1	9.38	61.62	8	0	114.2	95.1	101	103.1	111.9	107.6	Not Found	Not Found	Not Found	High	High	High	High	High	Not Found
FALSE	High	Master Protein	P84085	ADP-ribosylation factor 5 OS=Homo sapiens OX=9606 GN=ARF5 PE=1 SV=2	0	34.888	39	5	7	1	1	180	20.5	6.79	26.49	5	0	103.8	99.9	94.2	100.8	102.9	91.3	Not Found	Not Found	High	Not Found	Not Found	Not Found	Not Found	Not Found	Not Found
FALSE	High	Master Protein	P08572	Collagen alpha-2(IV) chain OS=Homo sapiens OX=9606 GN=COL4A2 PE=1 SV=4	0	34.854	5	7	14	7	1	1712	167.4	8.66	42.18	7	0	91	96.3	93.2	101.2	104.6	121.4	Not Found	High	High	High	High	Not Found	High	High	Not Found
FALSE	High	Master Protein	Q9BR76	Coronin-1B OS=Homo sapiens OX=9606 GN=CORO1B PE=1 SV=1	0	34.794	19	8	11	8	1	489	54.2	5.88	30.1	8	0	99.6	104.4	94.8	105.1	101.6	100.1	High	Not Found	Not Found	High	Not Found	Not Found	High	High	Not Found
FALSE	High	Master Protein	Q9BTE3	Mini-chromosome maintenance complex-binding protein OS=Homo sapiens OX=9606 GN=MCMBP PE=1 SV=2	0	34.761	12	6	7	6	1	642	72.9	5.87	21.58	6	0	89.7	91.9	93	94.1	99.6	139	High	High	Not Found	Not Found	Not Found	Not Found	Not Found	High	Not Found
FALSE	High	Master Protein	P61006	Ras-related protein Rab-8A OS=Homo sapiens OX=9606 GN=RAB8A PE=1 SV=1	0	34.757	29	6	13	3	1	207	23.7	9.07	43.17	6	0	108.2	105.5	104.9	110.6	105.3	81.3	Not Found	Not Found	Not Found	Not Found	Not Found	High	Not Found	Not Found	Not Found
FALSE	High	Master Protein	P35914	Hydroxymethylglutaryl-CoA lyase, mitochondrial OS=Homo sapiens OX=9606 GN=HMGCL PE=1 SV=2	0	34.703	22	6	9	6	1	325	34.3	8.54	30.19	6	0	100.3	97.2	97.9	103.7	108.9	103.7	Not Found	Not Found	Not Found	High	High	High	High	High	Not Found
FALSE	High	Master Protein	Q8N126	Cell adhesion molecule 3 OS=Homo sapiens OX=9606 GN=CADM3 PE=1 SV=1	0	34.687	24	6	7	6	1	398	43.3	6.09	30.49	6	0	104	107	101.7	107.1	104.5	95.6	Not Found	High	High	High	Not Found	High	Not Found	High	Not Found
FALSE	High	Master Protein	O00443	Phosphatidylinositol 4-phosphate 3-kinase C2 domain-containing subunit alpha OS=Homo sapiens OX=9606 GN=PIK3C2A PE=1 SV=2	0	34.655	6	10	10	10	1	1686	190.6	8.02	28.23	10	0	97.1	103.7	98.5	97	99.9	108.4	High	Not Found	High	High	High	High	High	High	Not Found
FALSE	High	Master Protein	P33527	Multidrug resistance-associated protein 1 OS=Homo sapiens OX=9606 GN=ABCC1 PE=1 SV=3	0	34.614	6	7	7	7	1	1531	171.5	7.11	21.09	7	0	99	96.2	92.7	99.2	99.5	122.8	Not Found	High	High	Not Found	High	High	Not Found	Not Found	Not Found
FALSE	High	Master Protein	P61604	10 kDa heat shock protein, mitochondrial OS=Homo sapiens OX=9606 GN=HSPE1 PE=1 SV=2	0	34.583	75	8	24	8	1	102	10.9	8.92	65.27	8	0	103.9	99.9	105.9	90.5	103.8	103.2	Not Found	Not Found	High	High	High	High	High	High	Not Found
FALSE	High	Master Protein	Q09028	Histone-binding protein RBBP4 OS=Homo sapiens OX=9606 GN=RBBP4 PE=1 SV=3	0	34.581	16	6	9	3	1	425	47.6	4.89	29.15	6	3	103.5	97	105.1	93.1	98.6	96.2	Not Found	Not Found	Not Found	High	Not Found	High	High	Not Found	Not Found
FALSE	High	Master Protein	Q5JTV8	Torsin-1A-interacting protein 1 OS=Homo sapiens OX=9606 GN=TOR1AIP1 PE=1 SV=2	0	34.568	14	6	7	6	1	583	66.2	8.18	26.66	6	0	110.9	100.1	108.3	99.9	104.5	98.5	Not Found	High	High	High	Not Found	High	Not Found	Not Found	High
FALSE	High	Master Protein	P49589	Cysteine--tRNA ligase, cytoplasmic OS=Homo sapiens OX=9606 GN=CARS1 PE=1 SV=3	0	34.563	15	9	10	9	1	748	85.4	6.76	24.16	9	0	91.3	100.4	93.3	102.5	99	104.9	Not Found	Not Found	High	High	High	High	High	Not Found	Not Found
FALSE	High	Master Protein	Q96HD1	Protein disulfide isomerase CRELD1 OS=Homo sapiens OX=9606 GN=CRELD1 PE=1 SV=3	0	34.425	23	6	6	6	1	420	45.4	4.87	25.08	6	0	99.2	100.5	99.3	97.8	102.4	112.8	Not Found	High	High	Not Found	Not Found	High	High	Not Found	Not Found
FALSE	High	Master Protein	P84095	Rho-related GTP-binding protein RhoG OS=Homo sapiens OX=9606 GN=RHOG PE=1 SV=1	0	34.402	30	4	9	3	1	191	21.3	8.12	30	4	0	103	104.9	97.1	97.9	105.9	109.8	Not Found	Not Found	Not Found	High	Not Found	Not Found	High	Not Found	Not Found
FALSE	High	Master Protein	P46776	60S ribosomal protein L27a OS=Homo sapiens OX=9606 GN=RPL27A PE=1 SV=2	0	34.382	34	5	20	5	1	148	16.6	11	58.14	5	0	104	107.9	100.2	103.3	96.3	85.5	Not Found	Not Found	Not Found	Not Found	High	High	High	High	Not Found
FALSE	High	Master Protein	Q15006	ER membrane protein complex subunit 2 OS=Homo sapiens OX=9606 GN=EMC2 PE=1 SV=1	0	34.381	29	7	8	7	1	297	34.8	6.57	25.3	7	0	97.8	93.4	100.7	96.5	100.9	116.3	Not Found	Not Found	High	High	High	Not Found	Not Found	High	Not Found
FALSE	High	Master Protein	Q9Y2T2	AP-3 complex subunit mu-1 OS=Homo sapiens OX=9606 GN=AP3M1 PE=1 SV=1	0	34.235	22	6	6	6	1	418	46.9	6.93	22.41	6	0	91.3	97.5	99.1	103.4	103.2	98.3	Not Found	Not Found	Not Found	High	High	Not Found	High	High	Not Found
FALSE	High	Master Protein	P52306	Rap1 GTPase-GDP dissociation stimulator 1 OS=Homo sapiens OX=9606 GN=RAP1GDS1 PE=1 SV=3	0	34.113	14	7	10	7	1	607	66.3	5.31	28.69	7	0	97.4	99.7	95.6	100.7	101.1	102.1	High	High	Not Found	High	High	High	High	High	Not Found
FALSE	High	Master Protein	O43684	Mitotic checkpoint protein BUB3 OS=Homo sapiens OX=9606 GN=BUB3 PE=1 SV=1	0	33.972	28	8	11	8	1	328	37.1	6.84	35.1	8	0	100.2	98.5	96.3	101.8	100.1	103.2	Not Found	Not Found	High	High	High	Not Found	High	Not Found	Not Found
FALSE	High	Master Protein	Q9BRK5	45 kDa calcium-binding protein OS=Homo sapiens OX=9606 GN=SDF4 PE=1 SV=1	0	33.972	20	5	6	5	1	362	41.8	4.86	24.08	5	0	108	109.7	103	98	101.5	95.9	High	Not Found	High	High	Not Found	High	Not Found	Not Found	Not Found
FALSE	High	Master Protein	P09874	Poly [ADP-ribose] polymerase 1 OS=Homo sapiens OX=9606 GN=PARP1 PE=1 SV=4	0	33.905	10	8	10	8	1	1014	113	8.88	30.94	8	0	94.4	94.1	96.2	98.9	100.2	106.1	Not Found	High	High	High	Not Found	Not Found	High	Not Found	High
FALSE	High	Master Protein	Q92747	Actin-related protein 2/3 complex subunit 1A OS=Homo sapiens OX=9606 GN=ARPC1A PE=1 SV=2	0	33.838	23	7	10	6	1	370	41.5	8.18	30.96	7	0	95.5	98.2	96.8	101.8	98.6	103.6	Not Found	Not Found	Not Found	High	High	High	High	High	Not Found
FALSE	High	Master Protein	Q9Y6G9	Cytoplasmic dynein 1 light intermediate chain 1 OS=Homo sapiens OX=9606 GN=DYNC1LI1 PE=1 SV=3	0	33.83	21	8	8	7	1	523	56.5	6.42	27.77	8	0	95.8	98.7	97.8	98.9	99	107	Not Found	Not Found	Not Found	High	High	Not Found	Not Found	High	Not Found
FALSE	High	Master Protein	P0DP25	Calmodulin-3 OS=Homo sapiens OX=9606 GN=CALM3 PE=1 SV=1	0	33.817	44	7	10	7	1	149	16.8	4.22	37.07	7	0	121.8	118.6	110	85.9	94	84.5	Not Found	High	High	Not Found	High	High	High	Not Found	Not Found
FALSE	High	Master Protein	Q9UNX3	60S ribosomal protein L26-like 1 OS=Homo sapiens OX=9606 GN=RPL26L1 PE=1 SV=1	0	33.776	45	9	28	2	1	145	17.2	10.55	73.5	9	0	92.3	101	107	97.7	96	100.7	Not Found	Not Found	Not Found	Not Found	High	High	Not Found	Not Found	Not Found
FALSE	High	Master Protein	Q04837	Single-stranded DNA-binding protein, mitochondrial OS=Homo sapiens OX=9606 GN=SSBP1 PE=1 SV=1	0	33.759	40	5	17	5	1	148	17.2	9.6	48.74	5	0	103.1	96.7	104.9	103.5	101.5	99.5	Not Found	Not Found	High	High	High	High	Not Found	High	Not Found
FALSE	High	Master Protein	P42785	Lysosomal Pro-X carboxypeptidase OS=Homo sapiens OX=9606 GN=PRCP PE=1 SV=1	0	33.757	15	6	9	6	1	496	55.8	7.21	32.25	6	0	105.2	98.2	106	94.8	106.3	93.5	Not Found	Not Found	High	Not Found	High	High	High	Not Found	Not Found
FALSE	High	Master Protein	Q99584	Protein S100-A13 OS=Homo sapiens OX=9606 GN=S100A13 PE=1 SV=1	0	33.746	49	6	15	6	1	98	11.5	6.16	48.23	6	0	104.9	104.1	105.4	102.5	97.2	78.6	Not Found	Not Found	High	High	High	High	High	Not Found	Not Found
FALSE	High	Master Protein	Q9NZL9	Methionine adenosyltransferase 2 subunit beta OS=Homo sapiens OX=9606 GN=MAT2B PE=1 SV=1	0	33.729	25	6	7	6	1	334	37.5	7.36	22.59	6	0	90.2	101.9	94.4	96.7	92.8	120.4	Not Found	High	Not Found	High	Not Found	High	High	High	Not Found
FALSE	High	Master Protein	P13073	Cytochrome c oxidase subunit 4 isoform 1, mitochondrial OS=Homo sapiens OX=9606 GN=COX4I1 PE=1 SV=1	0	33.661	38	6	14	6	1	169	19.6	9.51	46.76	6	0	118.4	93.6	100.6	101.4	115.5	100.5	Not Found	Not Found	High	High	High	High	High	High	Not Found
FALSE	High	Master Protein	Q9UHD9	Ubiquilin-2 OS=Homo sapiens OX=9606 GN=UBQLN2 PE=1 SV=2	0	33.633	14	6	8	3	1	624	65.7	5.22	28.15	6	3	93.4	102.7	96.1	106	96.8	92	Not Found	Not Found	Not Found	High	High	Not Found	High	Not Found	Not Found
FALSE	High	Master Protein	Q9BT09	Protein canopy homolog 3 OS=Homo sapiens OX=9606 GN=CNPY3 PE=1 SV=1	0	33.594	25	6	7	6	1	278	30.7	5.49	26.6	6	0	99	92.2	102	91.3	104.9	111.2	Not Found	High	High	Not Found	High	High	High	Not Found	Not Found
FALSE	High	Master Protein	Q96S97	Myeloid-associated differentiation marker OS=Homo sapiens OX=9606 GN=MYADM PE=1 SV=2	0	33.59	14	3	11	3	1	322	35.3	8.15	45.97	3	0	101.7	93.9	96.9	92.8	106.4	128.4	Not Found	Not Found	Not Found	Not Found	High	High	High	High	Not Found
FALSE	High	Master Protein	Q15637	Splicing factor 1 OS=Homo sapiens OX=9606 GN=SF1 PE=1 SV=4	0	33.583	14	6	10	6	1	639	68.3	8.98	31.43	6	0	101.5	102.3	102.9	99.8	98.6	96.4	High	Not Found	Not Found	High	High	High	High	Not Found	Not Found
FALSE	High	Master Protein	Q12765	Secernin-1 OS=Homo sapiens OX=9606 GN=SCRN1 PE=1 SV=2	0	33.542	20	6	9	6	1	414	46.4	4.75	30.01	6	0	87	88.5	83.7	85.2	95.1	172.8	High	High	High	High	High	Not Found	Not Found	Not Found	Not Found
FALSE	High	Master Protein	P05091	Aldehyde dehydrogenase, mitochondrial OS=Homo sapiens OX=9606 GN=ALDH2 PE=1 SV=2	0	33.529	14	7	13	5	1	517	56.3	7.05	37.92	7	0	101.6	101.1	98.9	95.7	105.2	99.4	Not Found	Not Found	High	Not Found	Not Found	High	High	High	Not Found
FALSE	High	Master Protein	Q13557	Calcium/calmodulin-dependent protein kinase type II subunit delta OS=Homo sapiens OX=9606 GN=CAMK2D PE=1 SV=3	0	33.449	15	8	13	6	1	499	56.3	7.25	36.71	8	2	100	100.5	101.3	100.2	99.3	97	High	High	Not Found	Not Found	High	High	High	High	Not Found
FALSE	High	Master Protein	O15020	Spectrin beta chain, non-erythrocytic 2 OS=Homo sapiens OX=9606 GN=SPTBN2 PE=1 SV=3	0	33.423	3	8	12	1	1	2390	271.2	6.11	38.23	8	0	93.9	93	91	93.8	114.1	139.6	Not Found	Not Found	Not Found	High	Not Found	Not Found	Not Found	Not Found	Not Found
FALSE	High	Master Protein	O94760	N(G),N(G)-dimethylarginine dimethylaminohydrolase 1 OS=Homo sapiens OX=9606 GN=DDAH1 PE=1 SV=3	0	33.41	28	7	9	6	1	285	31.1	5.81	26.85	7	1	92.9	102.3	99.3	101	95.9	99.7	Not Found	High	High	Not Found	High	Not Found	Not Found	High	High
FALSE	High	Master Protein	Q9HD26	Golgi-associated PDZ and coiled-coil motif-containing protein OS=Homo sapiens OX=9606 GN=GOPC PE=1 SV=1	0	33.385	20	8	10	8	1	462	50.5	5.92	34.51	8	0	101.2	102.3	99.4	104.8	96.9	90.2	Not Found	Not Found	High	High	High	High	Not Found	High	Not Found
FALSE	High	Master Protein	P05120	Plasminogen activator inhibitor 2 OS=Homo sapiens OX=9606 GN=SERPINB2 PE=1 SV=2	0	33.303	19	7	10	7	1	415	46.6	5.63	33.31	7	0	89.6	98.5	91.6	100.4	93.8	107.1	Not Found	High	High	High	Not Found	High	Not Found	Not Found	Not Found
FALSE	High	Master Protein	Q6PKG0	La-related protein 1 OS=Homo sapiens OX=9606 GN=LARP1 PE=1 SV=2	0	33.294	8	9	14	9	1	1096	123.4	8.82	48.54	9	0	97.8	108.6	100.7	105.2	91.9	88.1	Not Found	Not Found	Not Found	High	High	High	High	High	Not Found
FALSE	High	Master Protein	Q9HB71	Calcyclin-binding protein OS=Homo sapiens OX=9606 GN=CACYBP PE=1 SV=2	0	33.265	37	6	6	6	1	228	26.2	8.25	22.69	6	0	97.3	103.4	97	103.3	95.6	89.6	Not Found	High	Not Found	Not Found	High	High	Not Found	High	Not Found
FALSE	High	Master Protein	Q8IZL8	Proline-, glutamic acid- and leucine-rich protein 1 OS=Homo sapiens OX=9606 GN=PELP1 PE=1 SV=2	0	33.262	7	5	5	5	1	1130	119.6	4.34	19.36	5	0	95.1	102.6	89.1	98	97.4	127	Not Found	High	Not Found	High	High	Not Found	Not Found	High	Not Found
FALSE	High	Master Protein	P27105	Stomatin OS=Homo sapiens OX=9606 GN=STOM PE=1 SV=3	0	33.259	23	6	10	6	1	288	31.7	7.88	25.98	6	0	102.3	94.9	96.5	92.5	99.7	131.1	High	High	High	Not Found	Not Found	High	High	Not Found	High
FALSE	High	Master Protein	Q99436	Proteasome subunit beta type-7 OS=Homo sapiens OX=9606 GN=PSMB7 PE=1 SV=1	0	33.253	25	5	14	5	1	277	29.9	7.68	50.76	5	0	93	104.9	94.5	103.2	95.4	108.8	Not Found	Not Found	High	High	Not Found	Not Found	High	Not Found	Not Found
FALSE	High	Master Protein	Q8NCA5	Protein FAM98A OS=Homo sapiens OX=9606 GN=FAM98A PE=1 SV=2	0	33.248	13	7	10	6	1	518	55.2	8.95	33.41	7	1	99.7	99	101	104.4	100.4	97.2	Not Found	Not Found	Not Found	High	High	Not Found	High	High	Not Found
FALSE	High	Master Protein	P62244	40S ribosomal protein S15a OS=Homo sapiens OX=9606 GN=RPS15A PE=1 SV=2	0	33.178	46	6	14	6	1	130	14.8	10.13	41.46	6	0	105.5	104	92	92.9	108	84.6	Not Found	Not Found	Not Found	Not Found	High	High	High	High	Not Found
FALSE	High	Master Protein	Q9Y371	Endophilin-B1 OS=Homo sapiens OX=9606 GN=SH3GLB1 PE=1 SV=1	0	33.177	23	8	9	7	1	365	40.8	6.04	27.3	8	1	94.9	104.4	94.4	100.2	97.3	96.4	Not Found	Not Found	High	High	High	High	Not Found	High	High
FALSE	High	Master Protein	Q9UNS2	COP9 signalosome complex subunit 3 OS=Homo sapiens OX=9606 GN=COPS3 PE=1 SV=3	0	33.146	18	6	9	6	1	423	47.8	6.65	28.84	6	0	95.2	100.9	98	100.2	95.9	103.4	Not Found	High	High	High	High	Not Found	High	Not Found	Not Found
FALSE	High	Master Protein	Q9Y3B8	Oligoribonuclease, mitochondrial OS=Homo sapiens OX=9606 GN=REXO2 PE=1 SV=3	0	33.009	35	7	13	7	1	237	26.8	6.87	54.61	7	0	96.5	100.8	98.2	100.8	97.9	96.7	Not Found	Not Found	High	High	High	High	High	Not Found	Not Found
FALSE	High	Master Protein	P11498	Pyruvate carboxylase, mitochondrial OS=Homo sapiens OX=9606 GN=PC PE=1 SV=2	0	32.975	7	6	6	6	1	1178	129.6	6.84	23.36	6	0	95.7	91.3	88.1	97.7	107.3	123.9	Not Found	High	High	High	Not Found	High	Not Found	High	Not Found
FALSE	High	Master Protein	P18077	60S ribosomal protein L35a OS=Homo sapiens OX=9606 GN=RPL35A PE=1 SV=2	0	32.93	53	7	20	7	1	110	12.5	11.06	56.83	7	0	103.7	103.2	102.4	100.3	95.5	91.2	Not Found	Not Found	High	High	High	High	High	High	Not Found
FALSE	High	Master Protein	Q9BVK6	Transmembrane emp24 domain-containing protein 9 OS=Homo sapiens OX=9606 GN=TMED9 PE=1 SV=2	0	32.919	23	6	11	4	1	235	27.3	8.02	33.09	6	3	110.8	101.7	110.1	100.5	106.9	98.3	Not Found	Not Found	Not Found	High	High	High	Not Found	Not Found	High
FALSE	High	Master Protein	Q13442	28 kDa heat- and acid-stable phosphoprotein OS=Homo sapiens OX=9606 GN=PDAP1 PE=1 SV=1	0	32.89	33	6	8	6	1	181	20.6	8.87	26.59	6	0	103.5	106.9	103.4	107.2	94	79.8	Not Found	Not Found	High	Not Found	High	High	Not Found	High	High
FALSE	High	Master Protein	O95299	NADH dehydrogenase [ubiquinone] 1 alpha subcomplex subunit 10, mitochondrial OS=Homo sapiens OX=9606 GN=NDUFA10 PE=1 SV=1	0	32.888	23	8	10	8	1	355	40.7	8.48	30.9	8	0	106.7	100.9	98.6	97.2	105.7	94.3	High	Not Found	High	High	High	High	High	Not Found	Not Found
FALSE	High	Master Protein	P00441	Superoxide dismutase [Cu-Zn] OS=Homo sapiens OX=9606 GN=SOD1 PE=1 SV=2	0	32.882	42	6	8	6	1	154	15.9	6.13	24.5	6	0	91.6	93.3	101.5	111.7	102.4	83.9	Not Found	Not Found	High	Not Found	High	High	High	Not Found	Not Found
FALSE	High	Master Protein	P18084	Integrin beta-5 OS=Homo sapiens OX=9606 GN=ITGB5 PE=1 SV=1	0	32.863	11	8	8	8	1	799	88	6.06	20.98	8	0	103.1	100.6	99.3	99.8	101.9	109.9	High	High	Not Found	High	Not Found	High	High	High	Not Found
FALSE	High	Master Protein	O00461	Golgi integral membrane protein 4 OS=Homo sapiens OX=9606 GN=GOLIM4 PE=1 SV=1	0	32.845	9	6	7	6	1	696	81.8	4.77	23.12	6	0	109	101.2	103	94.5	100.5	108.9	High	Not Found	High	High	Not Found	High	Not Found	Not Found	Not Found
FALSE	High	Master Protein	O75947	ATP synthase subunit d, mitochondrial OS=Homo sapiens OX=9606 GN=ATP5PD PE=1 SV=3	0	32.838	70	9	14	9	1	161	18.5	5.3	41.44	9	0	126.1	104.9	98.8	97.3	108.6	79	Not Found	Not Found	High	High	High	High	High	Not Found	Not Found
FALSE	High	Master Protein	P16278	Beta-galactosidase OS=Homo sapiens OX=9606 GN=GLB1 PE=1 SV=2	0	32.686	12	6	9	6	1	677	76	6.57	30.6	6	0	100.1	98.4	100.8	94.3	110.3	108.9	Not Found	Not Found	High	High	High	High	Not Found	High	Not Found
FALSE	High	Master Protein	Q9UBQ0	Vacuolar protein sorting-associated protein 29 OS=Homo sapiens OX=9606 GN=VPS29 PE=1 SV=1	0	32.665	39	8	13	8	1	182	20.5	6.79	32.94	8	0	94.2	97.9	96.1	99.4	98.7	110	Not Found	Not Found	High	High	High	High	High	High	Not Found
FALSE	High	Master Protein	Q8NCC3	Phospholipase A2 group XV OS=Homo sapiens OX=9606 GN=PLA2G15 PE=1 SV=2	0	32.622	16	5	6	5	1	412	46.6	6.73	25.51	5	0	96.9	98.6	97.9	97.2	104	109.8	Not Found	Not Found	High	High	Not Found	High	Not Found	High	Not Found
FALSE	High	Master Protein	Q96JB5	CDK5 regulatory subunit-associated protein 3 OS=Homo sapiens OX=9606 GN=CDK5RAP3 PE=1 SV=2	0	32.573	16	8	8	8	1	506	56.9	4.75	26.28	8	0	101.7	91.8	101.8	90.8	104.2	119.6	Not Found	High	Not Found	High	High	High	High	Not Found	Not Found
FALSE	High	Master Protein	Q5VYK3	Proteasome adapter and scaffold protein ECM29 OS=Homo sapiens OX=9606 GN=ECPAS PE=1 SV=2	0	32.447	6	9	9	9	1	1845	204.2	7.12	22.55	9	0	96.9	108.8	97	106.3	95.9	86.1	Not Found	Not Found	Not Found	Not Found	High	High	High	High	Not Found
FALSE	High	Master Protein	Q9H2M9	Rab3 GTPase-activating protein non-catalytic subunit OS=Homo sapiens OX=9606 GN=RAB3GAP2 PE=1 SV=1	0	32.446	6	8	10	8	1	1393	155.9	5.62	31.53	8	0	102	101.4	102	102.1	100.4	95.2	Not Found	Not Found	Not Found	Not Found	High	High	High	High	Not Found
FALSE	High	Master Protein	O95881	Thioredoxin domain-containing protein 12 OS=Homo sapiens OX=9606 GN=TXNDC12 PE=1 SV=1	0	32.446	31	5	13	5	1	172	19.2	5.4	45.76	5	0	103.8	102.7	103.6	98.3	100	94	Not Found	Not Found	Not Found	High	High	Not Found	High	High	Not Found
FALSE	High	Master Protein	Q96SB3	Neurabin-2 OS=Homo sapiens OX=9606 GN=PPP1R9B PE=1 SV=3	0	32.402	9	6	6	6	1	817	89.3	4.97	21.56	6	0	101.8	95.2	99	92.4	103.6	113.8	Not Found	High	High	Not Found	High	High	Not Found	Not Found	Not Found
FALSE	High	Master Protein	P29558	RNA-binding motif, single-stranded-interacting protein 1 OS=Homo sapiens OX=9606 GN=RBMS1 PE=1 SV=3	0	32.351	16	5	7	4	1	406	44.5	8.79	23.2	5	2	98.2	91.5	100.6	94.6	97.4	113.7	Not Found	Not Found	Not Found	High	High	High	Not Found	Not Found	Not Found
FALSE	High	Master Protein	P19623	Spermidine synthase OS=Homo sapiens OX=9606 GN=SRM PE=1 SV=1	0	32.333	30	5	5	5	1	302	33.8	5.49	19.48	5	0	91.9	105.6	96.6	100.3	92	102.8	Not Found	High	Not Found	High	High	High	High	Not Found	Not Found
FALSE	High	Master Protein	Q969H8	Myeloid-derived growth factor OS=Homo sapiens OX=9606 GN=MYDGF PE=1 SV=1	0	32.325	27	6	13	6	1	173	18.8	6.68	40.11	6	0	104.9	104.7	109.1	94.3	101.4	86.2	Not Found	Not Found	High	High	High	High	High	High	Not Found
FALSE	High	Master Protein	Q53GQ0	Very-long-chain 3-oxoacyl-CoA reductase OS=Homo sapiens OX=9606 GN=HSD17B12 PE=1 SV=2	0	32.307	26	7	9	7	1	312	34.3	9.32	31.11	7	0	113.7	102.5	107.3	99.8	103.1	87.3	Not Found	Not Found	High	High	High	Not Found	High	High	Not Found
FALSE	High	Master Protein	Q8TAT6	Nuclear protein localization protein 4 homolog OS=Homo sapiens OX=9606 GN=NPLOC4 PE=1 SV=3	0	32.277	19	9	12	9	1	608	68.1	6.38	35.78	9	0	96.8	103.5	98.4	106.3	95.7	96.4	Not Found	Not Found	Not Found	High	High	High	High	Not Found	Not Found
FALSE	High	Master Protein	P00568	Adenylate kinase isoenzyme 1 OS=Homo sapiens OX=9606 GN=AK1 PE=1 SV=3	0	32.196	43	8	9	8	1	194	21.6	8.63	26.32	8	0	83.5	92.1	88.6	97.8	95.7	136.4	High	Not Found	Not Found	Not Found	High	High	High	High	High
FALSE	High	Master Protein	Q08170	Serine/arginine-rich splicing factor 4 OS=Homo sapiens OX=9606 GN=SRSF4 PE=1 SV=2	0	32.041	15	8	11	2	1	494	56.6	11.52	32.88	8	0	91.9	94.2	96.9	82.4	101.6	138.2	Not Found	High	Not Found	Not Found	Not Found	High	Not Found	Not Found	High
FALSE	High	Master Protein	Q9UEY8	Gamma-adducin OS=Homo sapiens OX=9606 GN=ADD3 PE=1 SV=1	0	31.979	14	8	8	8	1	706	79.1	6.32	26.34	8	0	98	97.5	96.4	97.4	105.6	111.9	Not Found	High	Not Found	High	Not Found	High	High	High	Not Found
FALSE	High	Master Protein	Q9UJ70	N-acetyl-D-glucosamine kinase OS=Homo sapiens OX=9606 GN=NAGK PE=1 SV=4	0	31.96	27	7	8	7	1	344	37.4	6.24	24.15	7	0	92.9	100.7	87.7	101.2	94.6	115	Not Found	Not Found	High	High	High	Not Found	Not Found	High	Not Found
FALSE	High	Master Protein	O75400	Pre-mRNA-processing factor 40 homolog A OS=Homo sapiens OX=9606 GN=PRPF40A PE=1 SV=2	0	31.896	9	8	11	8	1	957	108.7	7.56	34.45	8	0	107.2	105.6	107.6	95.8	100.8	86.5	High	High	Not Found	High	High	High	Not Found	Not Found	Not Found
FALSE	High	Master Protein	P42566	Epidermal growth factor receptor substrate 15 OS=Homo sapiens OX=9606 GN=EPS15 PE=1 SV=2	0	31.869	8	6	8	6	1	896	98.6	4.64	24.27	6	0	98.2	103.8	96.7	95.7	95.8	109.8	Not Found	High	High	Not Found	High	Not Found	Not Found	Not Found	Not Found
FALSE	High	Master Protein	P21266	Glutathione S-transferase Mu 3 OS=Homo sapiens OX=9606 GN=GSTM3 PE=1 SV=3	0	31.866	40	8	9	7	1	225	26.5	5.54	28.6	8	1	90	95	90.7	104.7	101.4	106.5	Not Found	High	Not Found	High	Not Found	High	High	High	Not Found
FALSE	High	Master Protein	Q10472	Polypeptide N-acetylgalactosaminyltransferase 1 OS=Homo sapiens OX=9606 GN=GALNT1 PE=1 SV=1	0	31.775	16	7	9	7	1	559	64.2	7.72	29.32	7	0	107.3	103	103	92.5	102.1	118.7	Not Found	High	High	Not Found	Not Found	High	Not Found	High	Not Found
FALSE	High	Master Protein	Q99747	Gamma-soluble NSF attachment protein OS=Homo sapiens OX=9606 GN=NAPG PE=1 SV=1	0	31.729	27	7	9	7	1	312	34.7	5.41	28.7	7	0	94.2	95.8	96.1	99.1	98.3	119.5	Not Found	Not Found	High	High	High	High	Not Found	High	Not Found
FALSE	High	Master Protein	Q99615	DnaJ homolog subfamily C member 7 OS=Homo sapiens OX=9606 GN=DNAJC7 PE=1 SV=2	0	31.671	13	6	7	6	1	494	56.4	6.96	24.41	6	0	88.7	97.6	96.8	105.9	94.2	98.7	Not Found	High	Not Found	High	Not Found	Not Found	Not Found	Not Found	Not Found
FALSE	High	Master Protein	Q99961	Endophilin-A2 OS=Homo sapiens OX=9606 GN=SH3GL1 PE=1 SV=1	0	31.663	20	7	15	7	1	368	41.5	5.43	38.96	7	0	92.5	98.4	93.8	98.7	99.2	108.1	Not Found	Not Found	High	High	High	High	High	High	Not Found
FALSE	High	Master Protein	Q3LXA3	Triokinase/FMN cyclase OS=Homo sapiens OX=9606 GN=TKFC PE=1 SV=2	0	31.554	16	5	5	5	1	575	58.9	7.49	20.66	5	0	87.7	92.8	90.9	101.1	100.4	125.4	High	Not Found	High	Not Found	High	Not Found	High	Not Found	Not Found
FALSE	High	Master Protein	P17096	High mobility group protein HMG-I/HMG-Y OS=Homo sapiens OX=9606 GN=HMGA1 PE=1 SV=3	0	31.545	31	4	30	4	1	107	11.7	10.32	116.42	4	0	103.2	97.5	105	100.5	96.8	95	Not Found	Not Found	High	High	High	High	High	High	Not Found
FALSE	High	Master Protein	Q93009	Ubiquitin carboxyl-terminal hydrolase 7 OS=Homo sapiens OX=9606 GN=USP7 PE=1 SV=2	0	31.512	9	9	9	9	1	1102	128.2	5.55	25.82	9	0	93.1	99.2	95.9	96.2	101.5	116.8	Not Found	High	High	High	High	Not Found	High	Not Found	Not Found
FALSE	High	Master Protein	Q9Y3A5	Ribosome maturation protein SBDS OS=Homo sapiens OX=9606 GN=SBDS PE=1 SV=4	0	31.5	40	11	15	11	1	250	28.7	8.75	43.18	11	0	98.5	103	97.6	103.1	94.5	95.9	High	Not Found	High	High	High	High	High	Not Found	Not Found
FALSE	High	Master Protein	O75116	Rho-associated protein kinase 2 OS=Homo sapiens OX=9606 GN=ROCK2 PE=1 SV=4	0	31.386	6	8	10	7	1	1388	160.8	6.02	30.49	8	1	100.4	101.5	95.8	95.3	96.3	111.3	Not Found	High	High	High	Not Found	High	Not Found	Not Found	Not Found
FALSE	High	Master Protein	Q7L576	Cytoplasmic FMR1-interacting protein 1 OS=Homo sapiens OX=9606 GN=CYFIP1 PE=1 SV=1	0	31.384	8	9	10	9	1	1253	145.1	6.9	27.79	9	0	93.6	102.2	93.2	104	101.8	103.7	High	Not Found	Not Found	High	Not Found	High	High	High	Not Found
FALSE	High	Master Protein	Q9UBQ7	Glyoxylate reductase/hydroxypyruvate reductase OS=Homo sapiens OX=9606 GN=GRHPR PE=1 SV=1	0	31.383	27	6	7	6	1	328	35.6	7.39	25.38	6	0	95.3	95.8	96.2	100.2	103	100.6	Not Found	High	High	High	Not Found	High	High	Not Found	Not Found
FALSE	High	Master Protein	P62942	Peptidyl-prolyl cis-trans isomerase FKBP1A OS=Homo sapiens OX=9606 GN=FKBP1A PE=1 SV=2	0	31.37	29	3	9	3	1	108	11.9	8.16	28.1	3	0	92.4	106.5	92.3	98.4	99.2	112	Not Found	Not Found	Not Found	High	High	High	Not Found	Not Found	Not Found
FALSE	High	Master Protein	P22692	Insulin-like growth factor-binding protein 4 OS=Homo sapiens OX=9606 GN=IGFBP4 PE=1 SV=2	0	31.257	18	5	8	5	1	258	27.9	7.15	25.69	5	0	103.1	109.7	102.6	92.8	97.2	114.9	Not Found	High	High	High	Not Found	High	Not Found	Not Found	Not Found
FALSE	High	Master Protein	Q7L5N1	COP9 signalosome complex subunit 6 OS=Homo sapiens OX=9606 GN=COPS6 PE=1 SV=1	0	31.216	17	4	5	4	1	327	36.1	5.73	18.11	4	0	100.8	99.8	100.3	96.6	101.8	101.5	Not Found	Not Found	Not Found	Not Found	High	High	High	Not Found	Not Found
FALSE	High	Master Protein	O75436	Vacuolar protein sorting-associated protein 26A OS=Homo sapiens OX=9606 GN=VPS26A PE=1 SV=2	0	31.213	28	7	8	7	1	327	38.1	6.57	22.75	7	0	96.6	97.5	95.3	99.9	97.1	114.2	High	High	Not Found	High	Not Found	High	Not Found	High	Not Found
FALSE	High	Master Protein	P17931	Galectin-3 OS=Homo sapiens OX=9606 GN=LGALS3 PE=1 SV=5	0	31.193	31	7	14	7	1	250	26.1	8.56	51.78	7	0	97.4	107.9	94.4	103	93.5	97.1	Not Found	Not Found	Not Found	Not Found	High	High	High	High	Not Found
FALSE	High	Master Protein	Q7Z460	CLIP-associating protein 1 OS=Homo sapiens OX=9606 GN=CLASP1 PE=1 SV=1	0	31.178	5	6	7	6	1	1538	169.3	9.03	20.31	6	0	98.2	100	97.5	105.4	97.1	102.8	Not Found	High	High	High	Not Found	Not Found	Not Found	Not Found	Not Found
FALSE	High	Master Protein	Q9BWM7	Sideroflexin-3 OS=Homo sapiens OX=9606 GN=SFXN3 PE=1 SV=3	0	31.163	27	7	9	6	1	321	35.5	9.1	29.88	7	0	100.7	101.2	99.8	97.6	106.2	102.4	Not Found	Not Found	High	High	High	High	High	Not Found	Not Found
FALSE	High	Master Protein	Q99700	Ataxin-2 OS=Homo sapiens OX=9606 GN=ATXN2 PE=1 SV=2	0	31.14	6	6	9	5	1	1313	140.2	9.57	32.43	6	0	95.7	103.2	97.9	100.7	95.8	101.9	High	Not Found	High	High	High	High	High	Not Found	Not Found
FALSE	High	Master Protein	P62841	40S ribosomal protein S15 OS=Homo sapiens OX=9606 GN=RPS15 PE=1 SV=2	0	31.14	27	5	15	5	1	145	17	10.39	43.05	5	0	99.8	101.3	104.4	100.8	99.8	87.4	Not Found	Not Found	Not Found	High	High	High	High	High	Not Found
FALSE	High	Master Protein	P26440	Isovaleryl-CoA dehydrogenase, mitochondrial OS=Homo sapiens OX=9606 GN=IVD PE=1 SV=2	0	30.948	19	8	10	8	1	426	46.6	8.05	28.76	8	0	102.6	96.7	97.3	91.3	104.7	119.9	Not Found	Not Found	Not Found	High	Not Found	High	High	High	Not Found
FALSE	High	Master Protein	P59998	Actin-related protein 2/3 complex subunit 4 OS=Homo sapiens OX=9606 GN=ARPC4 PE=1 SV=3	0	30.921	43	7	9	7	1	168	19.7	8.43	25.67	7	0	99.2	99.5	92	97.9	103.2	101.2	Not Found	High	Not Found	High	High	High	High	Not Found	Not Found
FALSE	High	Master Protein	Q9UNH7	Sorting nexin-6 OS=Homo sapiens OX=9606 GN=SNX6 PE=1 SV=1	0	30.905	18	7	13	7	1	406	46.6	6.16	34.22	7	0	99.8	104.1	95.3	100.5	95.6	104.5	High	High	High	High	High	High	High	Not Found	Not Found
FALSE	High	Master Protein	Q13148	TAR DNA-binding protein 43 OS=Homo sapiens OX=9606 GN=TARDBP PE=1 SV=1	0	30.881	12	5	9	5	1	414	44.7	6.19	25.18	5	0	107.5	103.7	107.6	98.8	98.4	82.6	High	High	High	High	High	Not Found	High	Not Found	Not Found
FALSE	High	Master Protein	Q13724	Mannosyl-oligosaccharide glucosidase OS=Homo sapiens OX=9606 GN=MOGS PE=1 SV=5	0	30.791	9	6	9	6	1	837	91.9	8.9	23	6	0	100.6	98.9	101.8	91.7	105.6	112.6	High	Not Found	Not Found	High	Not Found	High	High	High	Not Found
FALSE	High	Master Protein	Q92626	Peroxidasin homolog OS=Homo sapiens OX=9606 GN=PXDN PE=1 SV=2	0	30.783	5	6	6	6	1	1479	165.2	7.17	21.5	6	0	95.9	97.3	96.4	99.7	104.8	117.7	Not Found	High	High	High	Not Found	Not Found	Not Found	High	Not Found
FALSE	High	Master Protein	O60488	Long-chain-fatty-acid--CoA ligase 4 OS=Homo sapiens OX=9606 GN=ACSL4 PE=1 SV=2	0	30.774	18	10	10	9	1	711	79.1	8.38	31.38	10	1	95.5	93.2	96.4	95.8	106.1	98.8	High	Not Found	Not Found	Not Found	High	High	High	High	Not Found
FALSE	High	Master Protein	O95816	BAG family molecular chaperone regulator 2 OS=Homo sapiens OX=9606 GN=BAG2 PE=1 SV=1	0	30.768	34	7	7	7	1	211	23.8	6.7	25.63	7	0	103.2	100.3	104.4	94.9	95.6	110.3	Not Found	High	High	High	High	Not Found	Not Found	Not Found	Not Found
FALSE	High	Master Protein	Q16718	NADH dehydrogenase [ubiquinone] 1 alpha subcomplex subunit 5 OS=Homo sapiens OX=9606 GN=NDUFA5 PE=1 SV=3	0	30.545	44	5	5	5	1	116	13.5	5.99	20.06	5	0	101	102.6	102.6	99.8	109	87.8	Not Found	Not Found	High	Not Found	High	High	Not Found	Not Found	Not Found
FALSE	High	Master Protein	Q9Y4I1	Unconventional myosin-Va OS=Homo sapiens OX=9606 GN=MYO5A PE=1 SV=2	0	30.522	4	7	7	7	1	1855	215.3	8.48	22.68	7	0	100.3	103.6	99.1	95	99.1	101.9	Not Found	High	High	High	High	High	Not Found	Not Found	Not Found
FALSE	High	Master Protein	P48059	LIM and senescent cell antigen-like-containing domain protein 1 OS=Homo sapiens OX=9606 GN=LIMS1 PE=1 SV=4	0	30.521	25	8	10	8	1	325	37.2	8.05	29.52	8	0	92.3	101.9	93.6	106.3	98.3	90.7	Not Found	Not Found	Not Found	Not Found	High	Not Found	High	Not Found	Not Found
FALSE	High	Master Protein	P52948	Nuclear pore complex protein Nup98-Nup96 OS=Homo sapiens OX=9606 GN=NUP98 PE=1 SV=4	0	30.505	4	7	7	7	1	1817	197.5	6.4	23.41	7	0	101.8	97.3	99.7	95.2	101	105.2	Not Found	High	High	Not Found	Not Found	High	Not Found	High	Not Found
FALSE	High	Master Protein	Q9BPW8	Protein NipSnap homolog 1 OS=Homo sapiens OX=9606 GN=NIPSNAP1 PE=1 SV=1	0	30.461	27	8	12	6	1	284	33.3	9.31	30.75	8	2	100.4	99.6	103.9	98.8	103.1	102.2	Not Found	Not Found	Not Found	Not Found	High	High	High	High	Not Found
FALSE	High	Master Protein	O14828	Secretory carrier-associated membrane protein 3 OS=Homo sapiens OX=9606 GN=SCAMP3 PE=1 SV=3	0	30.459	16	4	4	4	1	347	38.3	7.64	16.63	4	0	110.9	106.5	103.3	101.2	101.3	87.4	Not Found	Not Found	Not Found	Not Found	High	High	Not Found	Not Found	Not Found
FALSE	High	Master Protein	P04259	Keratin, type II cytoskeletal 6B OS=Homo sapiens OX=9606 GN=KRT6B PE=1 SV=5	0	30.426	15	9	36	1	1	564	60	8	84.1	9	1	94.5	107.2	109.8	100.8	128.5	90.7	Not Found	Not Found	Not Found	Not Found	Not Found	Not Found	High	Not Found	Not Found
FALSE	High	Master Protein	P49721	Proteasome subunit beta type-2 OS=Homo sapiens OX=9606 GN=PSMB2 PE=1 SV=1	0	30.419	23	5	15	5	1	201	22.8	7.02	45.09	5	0	99.9	103.5	100.3	103.9	99.9	85	Not Found	Not Found	Not Found	High	High	High	High	High	Not Found
FALSE	High	Master Protein	Q9Y5K6	CD2-associated protein OS=Homo sapiens OX=9606 GN=CD2AP PE=1 SV=1	0	30.405	14	7	9	7	1	639	71.4	6.4	28.91	7	0	98.5	104.5	98.4	101.3	97.4	95.8	Not Found	Not Found	Not Found	High	High	Not Found	High	High	Not Found
FALSE	High	Master Protein	Q9H307	Pinin OS=Homo sapiens OX=9606 GN=PNN PE=1 SV=5	0	30.364	10	6	6	6	1	717	81.6	7.14	19.8	6	0	100.2	98.3	95.9	100.3	99.4	115.1	Not Found	High	Not Found	High	High	High	Not Found	Not Found	High
FALSE	High	Master Protein	Q9H0B6	Kinesin light chain 2 OS=Homo sapiens OX=9606 GN=KLC2 PE=1 SV=1	0	30.356	13	8	9	2	1	622	68.9	7.15	25.7	8	0	97.3	92.1	91.7	90.1	100.1	126.8	Not Found	High	Not Found	High	Not Found	Not Found	Not Found	Not Found	Not Found
FALSE	High	Master Protein	Q96M27	Protein PRRC1 OS=Homo sapiens OX=9606 GN=PRRC1 PE=1 SV=1	0	30.337	12	4	9	4	1	445	46.7	5.83	31.57	4	0	98	99.6	100.7	98.1	99.1	107.4	Not Found	Not Found	Not Found	High	High	High	High	Not Found	Not Found
FALSE	High	Master Protein	Q13488	V-type proton ATPase 116 kDa subunit a3 OS=Homo sapiens OX=9606 GN=TCIRG1 PE=1 SV=3	0	30.316	8	5	5	5	1	830	92.9	7.12	17.85	5	0	102.8	98	98.2	97.1	104.6	115.1	Not Found	High	Not Found	Not Found	Not Found	Not Found	High	High	Not Found
FALSE	High	Master Protein	Q9UBQ5	Eukaryotic translation initiation factor 3 subunit K OS=Homo sapiens OX=9606 GN=EIF3K PE=1 SV=1	0	30.288	32	5	6	5	1	218	25	4.93	21.4	5	0	95.8	96.3	101.1	100.1	100.3	97	Not Found	Not Found	High	High	High	High	High	Not Found	Not Found
FALSE	High	Master Protein	Q9UBI6	Guanine nucleotide-binding protein G(I)/G(S)/G(O) subunit gamma-12 OS=Homo sapiens OX=9606 GN=GNG12 PE=1 SV=3	0	30.244	67	4	11	4	1	72	8	8.97	41	4	0	115.3	116.6	104.7	106.1	101.2	83.8	Not Found	High	High	High	Not Found	High	High	High	Not Found
FALSE	High	Master Protein	O43615	Mitochondrial import inner membrane translocase subunit TIM44 OS=Homo sapiens OX=9606 GN=TIMM44 PE=1 SV=2	0	30.134	15	6	6	6	1	452	51.3	8.32	21.81	6	0	106.9	96.7	93.7	87.8	105.9	125.2	Not Found	High	High	Not Found	Not Found	High	Not Found	Not Found	Not Found
FALSE	High	Master Protein	P26368	Splicing factor U2AF 65 kDa subunit OS=Homo sapiens OX=9606 GN=U2AF2 PE=1 SV=4	0	30.122	21	8	10	8	1	475	53.5	9.09	34.61	8	0	99.1	95.7	104.1	100.1	96.8	98	Not Found	High	Not Found	High	High	Not Found	High	High	Not Found
FALSE	High	Master Protein	P02768	Albumin OS=Homo sapiens OX=9606 GN=ALB PE=1 SV=2	0	30.044	8	6	74	6	1	609	69.3	6.28	208.23	6	0	59.6	90.4	96.7	126	80.8	90.4	Not Found	Not Found	High	High	High	High	High	High	Not Found
FALSE	High	Master Protein	Q9Y680	Peptidyl-prolyl cis-trans isomerase FKBP7 OS=Homo sapiens OX=9606 GN=FKBP7 PE=1 SV=2	0	29.949	36	7	11	7	1	222	25.8	6.32	29.42	7	0	98.1	97.3	101.1	100.9	100.1	105.2	High	High	High	High	High	High	High	High	Not Found
FALSE	High	Master Protein	O00764	Pyridoxal kinase OS=Homo sapiens OX=9606 GN=PDXK PE=1 SV=1	0	29.934	25	6	6	6	1	312	35.1	6.13	20.63	6	0	85.1	102.4	96.8	106.7	95.2	114.5	Not Found	Not Found	Not Found	High	High	High	High	High	Not Found
FALSE	High	Master Protein	P01023	Alpha-2-macroglobulin OS=Homo sapiens OX=9606 GN=A2M PE=1 SV=3	0	29.927	4	7	19	7	1	1474	163.2	6.46	56.96	7	0	77	90.4	97.9	102.2	90.2	91.3	Not Found	Not Found	Not Found	High	High	High	High	High	Not Found
FALSE	High	Master Protein	P50402	Emerin OS=Homo sapiens OX=9606 GN=EMD PE=1 SV=1	0	29.912	22	5	5	5	1	254	29	5.5	18.02	5	0	112.2	99	104.3	100.8	107.6	105.4	Not Found	High	High	High	Not Found	High	Not Found	Not Found	Not Found
FALSE	High	Master Protein	P22059	Oxysterol-binding protein 1 OS=Homo sapiens OX=9606 GN=OSBP PE=1 SV=1	0	29.859	10	6	7	6	1	807	89.4	7.3	21.48	6	0	96.3	106	91.1	100.8	95.1	93.1	Not Found	High	High	High	Not Found	High	Not Found	High	Not Found
FALSE	High	Master Protein	P28482	Mitogen-activated protein kinase 1 OS=Homo sapiens OX=9606 GN=MAPK1 PE=1 SV=3	0	29.852	25	8	9	4	1	360	41.4	6.98	29.2	8	4	97.1	101.8	96.7	99.9	95.9	100.5	Not Found	Not Found	High	High	High	High	High	Not Found	Not Found
FALSE	High	Master Protein	Q9H223	EH domain-containing protein 4 OS=Homo sapiens OX=9606 GN=EHD4 PE=1 SV=1	0	29.831	17	9	10	6	1	541	61.1	6.76	26.83	9	0	94.1	90.8	88.7	91.3	105.1	134	Not Found	High	High	High	High	Not Found	Not Found	High	Not Found
FALSE	High	Master Protein	P04080	Cystatin-B OS=Homo sapiens OX=9606 GN=CSTB PE=1 SV=2	0	29.793	52	4	5	4	1	98	11.1	7.56	21.84	4	0	92.2	100.2	102.6	98.4	96.2	76.8	Not Found	Not Found	High	High	Not Found	Not Found	High	High	Not Found
FALSE	High	Master Protein	Q86Y82	Syntaxin-12 OS=Homo sapiens OX=9606 GN=STX12 PE=1 SV=1	0	29.777	26	6	8	6	1	276	31.6	5.59	26.25	6	0	110.6	111.3	103.6	107.1	97	82.8	Not Found	Not Found	High	High	High	High	Not Found	High	Not Found
FALSE	High	Master Protein	Q6PIU2	Neutral cholesterol ester hydrolase 1 OS=Homo sapiens OX=9606 GN=NCEH1 PE=1 SV=3	0	29.613	17	6	8	6	1	408	45.8	7.23	29.96	6	0	109.6	97	102.6	101.1	107	99.2	High	High	Not Found	Not Found	High	High	High	High	Not Found
FALSE	High	Master Protein	O75340	Programmed cell death protein 6 OS=Homo sapiens OX=9606 GN=PDCD6 PE=1 SV=1	0	29.558	36	5	5	5	1	191	21.9	5.4	20.71	5	0	101.7	95.2	102.6	89.9	104.6	111.8	Not Found	Not Found	Not Found	Not Found	Not Found	High	High	High	Not Found
FALSE	High	Master Protein	P09012	U1 small nuclear ribonucleoprotein A OS=Homo sapiens OX=9606 GN=SNRPA PE=1 SV=3	0	29.539	29	7	13	5	1	282	31.3	9.83	38.4	7	2	106	98.9	106	92.8	101.9	103.7	Not Found	Not Found	High	High	Not Found	High	High	High	Not Found
FALSE	High	Master Protein	Q13098	COP9 signalosome complex subunit 1 OS=Homo sapiens OX=9606 GN=GPS1 PE=1 SV=4	0	29.529	15	5	9	5	1	491	55.5	6.74	26.45	5	0	94.8	106.2	98.2	99.6	97.8	96.4	High	High	High	Not Found	High	Not Found	High	Not Found	Not Found
FALSE	High	Master Protein	P17813	Endoglin OS=Homo sapiens OX=9606 GN=ENG PE=1 SV=2	0	29.492	14	7	8	7	1	658	70.5	6.61	25.77	7	0	92.8	97.2	91.7	109.2	104.5	119.3	Not Found	Not Found	Not Found	High	High	High	High	High	Not Found
FALSE	High	Master Protein	Q8N183	NADH dehydrogenase [ubiquinone] 1 alpha subcomplex assembly factor 2 OS=Homo sapiens OX=9606 GN=NDUFAF2 PE=1 SV=1	0	29.471	44	6	6	6	1	169	19.8	8.97	22.25	6	0	92.9	91.2	95.9	85.7	105.7	144.6	Not Found	Not Found	High	High	Not Found	High	High	High	Not Found
FALSE	High	Master Protein	P48634	Protein PRRC2A OS=Homo sapiens OX=9606 GN=PRRC2A PE=1 SV=3	0	29.457	4	6	7	6	1	2157	228.7	9.45	24.74	6	0	92.5	93.6	97.6	97	92.2	129.5	High	High	High	High	Not Found	High	Not Found	Not Found	Not Found
FALSE	High	Master Protein	P36507	Dual specificity mitogen-activated protein kinase kinase 2 OS=Homo sapiens OX=9606 GN=MAP2K2 PE=1 SV=1	0	29.396	20	7	12	3	1	400	44.4	6.55	35.23	7	0	99.4	96.7	95.9	106.3	99.3	97.6	Not Found	Not Found	Not Found	Not Found	High	High	High	Not Found	Not Found
FALSE	High	Master Protein	P62834	Ras-related protein Rap-1A OS=Homo sapiens OX=9606 GN=RAP1A PE=1 SV=1	0	29.369	33	6	11	1	1	184	21	6.67	35.96	6	0	97.1	104.6	98	117.3	102.7	97.2	Not Found	Not Found	Not Found	Not Found	Not Found	High	Not Found	Not Found	Not Found
FALSE	High	Master Protein	Q96QV1	Hedgehog-interacting protein OS=Homo sapiens OX=9606 GN=HHIP PE=1 SV=3	0	29.304	14	8	8	8	1	700	78.8	7.9	26.37	8	0	95.3	92	94.7	97.7	105.7	116.2	Not Found	High	High	High	Not Found	High	High	High	Not Found
FALSE	High	Master Protein	P23497	Nuclear autoantigen Sp-100 OS=Homo sapiens OX=9606 GN=SP100 PE=1 SV=3	0	29.295	11	8	10	6	1	879	100.4	8.22	30.4	8	0	99.4	95.8	98.8	91.8	99.3	123.6	Not Found	High	High	Not Found	Not Found	High	Not Found	Not Found	Not Found
FALSE	High	Master Protein	P40763	Signal transducer and activator of transcription 3 OS=Homo sapiens OX=9606 GN=STAT3 PE=1 SV=2	0	29.256	9	5	6	5	1	770	88	6.3	20.58	5	0	95.1	100.9	102.4	99.8	94	94.9	Not Found	Not Found	Not Found	Not Found	High	High	Not Found	High	Not Found
FALSE	High	Master Protein	O75832	26S proteasome non-ATPase regulatory subunit 10 OS=Homo sapiens OX=9606 GN=PSMD10 PE=1 SV=1	0	29.244	30	5	5	5	1	226	24.4	6.1	18.4	5	0	94.6	99	94.8	99.5	95	104.6	Not Found	High	Not Found	High	Not Found	High	High	Not Found	Not Found
FALSE	High	Master Protein	Q6PGP7	Tetratricopeptide repeat protein 37 OS=Homo sapiens OX=9606 GN=TTC37 PE=1 SV=1	0	29.236	6	10	10	10	1	1564	175.4	7.53	28.37	10	0	95.5	101.1	96.4	104.4	100	102.7	Not Found	High	Not Found	High	Not Found	High	High	High	Not Found
FALSE	High	Master Protein	Q15654	Thyroid receptor-interacting protein 6 OS=Homo sapiens OX=9606 GN=TRIP6 PE=1 SV=3	0	29.127	18	5	5	5	1	476	50.3	7.37	18.77	5	0	85.9	95.1	98.8	100.2	99.6	129.3	Not Found	High	High	Not Found	High	Not Found	High	High	Not Found
FALSE	High	Master Protein	P08582	Melanotransferrin OS=Homo sapiens OX=9606 GN=MELTF PE=1 SV=2	0	29.064	8	6	6	6	1	738	80.2	5.94	19.28	6	0	100.7	96.2	94	92.1	103.6	126.6	Not Found	Not Found	High	High	High	High	High	Not Found	Not Found
FALSE	High	Master Protein	O14786	Neuropilin-1 OS=Homo sapiens OX=9606 GN=NRP1 PE=1 SV=3	0	29.061	8	5	5	5	1	923	103.1	5.88	18.54	5	0	104.6	100.5	101.4	104.3	101.9	101	Not Found	Not Found	High	High	Not Found	Not Found	High	High	Not Found
FALSE	High	Master Protein	O94906	Pre-mRNA-processing factor 6 OS=Homo sapiens OX=9606 GN=PRPF6 PE=1 SV=1	0	29.051	7	6	7	6	1	941	106.9	8.25	21.57	6	0	97.1	92.8	95.2	92.7	101.6	129	High	High	Not Found	Not Found	High	High	Not Found	Not Found	Not Found
FALSE	High	Master Protein	Q16186	Proteasomal ubiquitin receptor ADRM1 OS=Homo sapiens OX=9606 GN=ADRM1 PE=1 SV=2	0	29.033	17	6	8	6	1	407	42.1	5.07	23.43	6	0	98.5	100.2	95.3	104.7	92.2	98.3	Not Found	Not Found	High	High	High	High	High	Not Found	Not Found
FALSE	High	Master Protein	Q86XZ4	Spermatogenesis-associated serine-rich protein 2 OS=Homo sapiens OX=9606 GN=SPATS2 PE=1 SV=1	0	29.014	18	9	9	9	1	545	59.5	8.9	23.49	9	0	96.4	94.6	100.5	101.4	102.3	111.3	Not Found	High	High	High	High	High	Not Found	Not Found	High
FALSE	High	Master Protein	Q9Y3B7	39S ribosomal protein L11, mitochondrial OS=Homo sapiens OX=9606 GN=MRPL11 PE=1 SV=1	0	28.966	30	6	6	6	1	192	20.7	9.91	20.18	6	0	99.6	96.3	99.7	94.9	106.8	108.9	Not Found	Not Found	High	Not Found	Not Found	High	High	High	Not Found
FALSE	High	Master Protein	Q9Y2Q3	Glutathione S-transferase kappa 1 OS=Homo sapiens OX=9606 GN=GSTK1 PE=1 SV=3	0	28.948	33	6	7	6	1	226	25.5	8.41	23.17	6	0	101.6	105.5	91.7	96.9	103.3	98.5	Not Found	Not Found	High	High	High	High	Not Found	High	High
FALSE	High	Master Protein	Q9UH65	Switch-associated protein 70 OS=Homo sapiens OX=9606 GN=SWAP70 PE=1 SV=1	0	28.932	12	8	10	8	1	585	69	5.87	29.21	8	0	98.3	97.9	100.7	99.5	95.2	105	High	High	High	Not Found	Not Found	High	Not Found	High	Not Found
FALSE	High	Master Protein	Q6FI81	Anamorsin OS=Homo sapiens OX=9606 GN=CIAPIN1 PE=1 SV=2	0	28.914	25	7	7	7	1	312	33.6	5.62	21.83	7	0	93.5	104.3	97	101.8	97.1	93	Not Found	High	High	High	High	High	Not Found	Not Found	Not Found
FALSE	High	Master Protein	Q99733	Nucleosome assembly protein 1-like 4 OS=Homo sapiens OX=9606 GN=NAP1L4 PE=1 SV=1	0	28.885	24	7	12	6	1	375	42.8	4.69	37.43	7	0	98.4	100.1	96.5	99.5	101.5	103.3	Not Found	High	Not Found	Not Found	High	High	High	High	Not Found
FALSE	High	Master Protein	P21283	V-type proton ATPase subunit C 1 OS=Homo sapiens OX=9606 GN=ATP6V1C1 PE=1 SV=4	0	28.877	20	8	8	8	1	382	43.9	7.46	25.29	8	0	96	105.8	99.3	107.9	93.9	86.2	Not Found	Not Found	High	High	High	High	High	Not Found	Not Found
FALSE	High	Master Protein	P62995	Transformer-2 protein homolog beta OS=Homo sapiens OX=9606 GN=TRA2B PE=1 SV=1	0	28.861	23	5	5	4	1	288	33.6	11.25	17.71	5	1	104	93.6	104.8	89.4	101	108.2	Not Found	Not Found	Not Found	High	Not Found	High	Not Found	Not Found	Not Found
FALSE	High	Master Protein	Q9NQR4	Omega-amidase NIT2 OS=Homo sapiens OX=9606 GN=NIT2 PE=1 SV=1	0	28.838	27	6	7	6	1	276	30.6	7.21	23.64	6	0	98.1	99.4	97.8	104.3	96.7	95.4	Not Found	Not Found	High	High	High	Not Found	High	Not Found	Not Found
FALSE	High	Master Protein	P31949	Protein S100-A11 OS=Homo sapiens OX=9606 GN=S100A11 PE=1 SV=2	0	28.829	50	5	50	5	1	105	11.7	7.12	145.45	5	0	112.9	103.7	112	91.2	104.7	93.4	Not Found	High	High	High	High	High	High	High	Not Found
FALSE	High	Master Protein	P29323	Ephrin type-B receptor 2 OS=Homo sapiens OX=9606 GN=EPHB2 PE=1 SV=5	0	28.775	6	5	5	4	1	1055	117.4	6.55	15.83	5	0	100.9	93.2	96.2	99	99.9	125.2	Not Found	High	Not Found	Not Found	Not Found	Not Found	High	Not Found	Not Found
FALSE	High	Master Protein	O94929	Actin-binding LIM protein 3 OS=Homo sapiens OX=9606 GN=ABLIM3 PE=1 SV=3	0	28.675	12	8	9	8	1	683	77.8	8.54	20.46	8	0	100.2	100.2	101.2	101.6	102.1	97.7	Not Found	Not Found	High	High	High	High	High	High	Not Found
FALSE	High	Master Protein	Q9BRX2	Protein pelota homolog OS=Homo sapiens OX=9606 GN=PELO PE=1 SV=2	0	28.667	12	5	5	5	1	385	43.3	6.34	17.96	5	0	91.4	93.9	95	106.6	98.2	114	Not Found	High	High	Not Found	High	Not Found	Not Found	High	Not Found
FALSE	High	Master Protein	Q6P996	Pyridoxal-dependent decarboxylase domain-containing protein 1 OS=Homo sapiens OX=9606 GN=PDXDC1 PE=1 SV=2	0	28.665	10	7	7	7	1	788	86.7	5.38	24.05	7	0	96.9	96	96	98.7	97.6	110.9	Not Found	Not Found	High	High	Not Found	Not Found	Not Found	High	Not Found
FALSE	High	Master Protein	O60684	Importin subunit alpha-7 OS=Homo sapiens OX=9606 GN=KPNA6 PE=1 SV=1	0	28.636	14	6	8	3	1	536	60	4.98	25.14	6	3	96.7	107.9	90.5	108.3	94.4	98	Not Found	High	High	Not Found	High	Not Found	High	Not Found	Not Found
FALSE	High	Master Protein	Q9H845	Complex I assembly factor ACAD9, mitochondrial OS=Homo sapiens OX=9606 GN=ACAD9 PE=1 SV=1	0	28.609	10	6	9	6	1	621	68.7	7.96	28.09	6	0	103.4	99.3	97.1	100.1	108	102.3	Not Found	Not Found	High	Not Found	High	High	Not Found	Not Found	Not Found
FALSE	High	Master Protein	Q99959	Plakophilin-2 OS=Homo sapiens OX=9606 GN=PKP2 PE=1 SV=2	0	28.579	7	5	5	5	1	881	97.4	9.33	17.82	5	0	100	106.6	94.9	101.3	97.9	105.4	Not Found	High	Not Found	High	High	High	Not Found	High	Not Found
FALSE	High	Master Protein	Q01081	Splicing factor U2AF 35 kDa subunit OS=Homo sapiens OX=9606 GN=U2AF1 PE=1 SV=3	0	28.511	23	4	9	4	1	240	27.9	8.81	26.26	4	0	103.6	98.7	104.9	92.2	100.4	95.8	Not Found	High	High	High	Not Found	Not Found	Not Found	High	Not Found
FALSE	High	Master Protein	Q9H4B7	Tubulin beta-1 chain OS=Homo sapiens OX=9606 GN=TUBB1 PE=1 SV=1	0	28.511	12	6	29	1	1	451	50.3	5.17	84.24	6	0							Not Found	Not Found	Not Found	Not Found	Not Found	High	Not Found	Not Found	Not Found
FALSE	High	Master Protein	P62913	60S ribosomal protein L11 OS=Homo sapiens OX=9606 GN=RPL11 PE=1 SV=2	0	28.505	49	8	13	8	1	178	20.2	9.6	34.93	8	0	97.4	98.3	101.4	99.9	101.2	98.4	Not Found	Not Found	High	Not Found	High	High	High	High	Not Found
FALSE	High	Master Protein	P22061	Protein-L-isoaspartate(D-aspartate) O-methyltransferase OS=Homo sapiens OX=9606 GN=PCMT1 PE=1 SV=4	0	28.497	31	6	6	6	1	227	24.6	7.21	21.26	6	0	91.5	94.3	95.5	101	97.2	111	Not Found	Not Found	Not Found	Not Found	High	High	High	Not Found	Not Found
FALSE	High	Master Protein	Q13619	Cullin-4A OS=Homo sapiens OX=9606 GN=CUL4A PE=1 SV=3	0	28.467	10	6	6	2	1	759	87.6	8.13	20.36	6	0	96.1	106.3	95.7	102.9	96.4	88.2	Not Found	Not Found	Not Found	High	Not Found	Not Found	Not Found	High	Not Found
FALSE	High	Master Protein	P61086	Ubiquitin-conjugating enzyme E2 K OS=Homo sapiens OX=9606 GN=UBE2K PE=1 SV=3	0	28.442	33	5	9	5	1	200	22.4	5.44	33.3	5	0	98	104	98.8	104.5	98.1	97.9	Not Found	High	High	Not Found	Not Found	High	High	High	Not Found
FALSE	High	Master Protein	P47985	Cytochrome b-c1 complex subunit Rieske, mitochondrial OS=Homo sapiens OX=9606 GN=UQCRFS1 PE=1 SV=2	0	28.373	22	7	10	7	1	274	29.6	8.32	34.3	7	0	101	101	98.1	96.3	101.8	110.6	High	High	High	High	High	High	High	Not Found	Not Found
FALSE	High	Master Protein	P14927	Cytochrome b-c1 complex subunit 7 OS=Homo sapiens OX=9606 GN=UQCRB PE=1 SV=2	0	28.364	55	7	9	7	1	111	13.5	8.78	22.13	7	0	106.6	99.1	107.5	91.4	104.6	97.3	High	High	Not Found	High	Not Found	High	High	High	Not Found
FALSE	High	Master Protein	O15511	Actin-related protein 2/3 complex subunit 5 OS=Homo sapiens OX=9606 GN=ARPC5 PE=1 SV=3	0	28.332	40	6	11	5	1	151	16.3	5.67	34.84	6	2	99.1	108.2	96.5	109.7	92.1	86.4	Not Found	Not Found	Not Found	Not Found	High	High	High	Not Found	Not Found
FALSE	High	Master Protein	A6NHL2	Tubulin alpha chain-like 3 OS=Homo sapiens OX=9606 GN=TUBAL3 PE=1 SV=2	0	28.304	9	4	32	1	1	446	49.9	6.05	76.68	4	0	95.7	96.2	96.9	97.4	99	91.5	Not Found	Not Found	Not Found	Not Found	Not Found	Not Found	High	Not Found	Not Found
FALSE	High	Master Protein	Q9GZS3	WD repeat-containing protein 61 OS=Homo sapiens OX=9606 GN=WDR61 PE=1 SV=1	0	28.292	26	5	6	5	1	305	33.6	5.47	22.91	5	0	95.9	92.8	96.1	90.7	103.1	124.7	Not Found	Not Found	High	Not Found	High	Not Found	High	Not Found	Not Found
FALSE	High	Master Protein	Q9Y3D6	Mitochondrial fission 1 protein OS=Homo sapiens OX=9606 GN=FIS1 PE=1 SV=2	0	28.29	24	3	7	3	1	152	16.9	8.79	22.81	3	0	97.8	101.7	99.5	99.3	98.9	104	Not Found	Not Found	Not Found	Not Found	High	High	High	Not Found	Not Found
FALSE	High	Master Protein	P06865	Beta-hexosaminidase subunit alpha OS=Homo sapiens OX=9606 GN=HEXA PE=1 SV=2	0	28.271	15	8	10	7	1	529	60.7	5.16	28.93	8	0	101.8	97.6	103.1	95.8	103	104.5	Not Found	High	Not Found	High	High	High	Not Found	High	Not Found
FALSE	High	Master Protein	P27144	Adenylate kinase 4, mitochondrial OS=Homo sapiens OX=9606 GN=AK4 PE=1 SV=1	0	28.242	33	7	19	7	1	223	25.3	8.4	58.5	7	0	100.2	99.3	98.8	96.9	106.9	105.5	Not Found	Not Found	Not Found	High	Not Found	High	High	High	Not Found
FALSE	High	Master Protein	Q8N3V7	Synaptopodin OS=Homo sapiens OX=9606 GN=SYNPO PE=1 SV=2	0	28.24	10	6	7	6	1	929	99.4	8.72	25.44	6	0	92.1	108	93.5	107.3	96.3	104.7	Not Found	High	High	High	High	High	Not Found	Not Found	Not Found
FALSE	High	Master Protein	Q9BPX5	Actin-related protein 2/3 complex subunit 5-like protein OS=Homo sapiens OX=9606 GN=ARPC5L PE=1 SV=1	0	28.212	43	6	7	5	1	153	16.9	6.6	21.17	6	0	93.4	101.9	95.2	95.6	99.2	110.2	Not Found	Not Found	High	Not Found	Not Found	High	High	High	Not Found
FALSE	High	Master Protein	P15153	Ras-related C3 botulinum toxin substrate 2 OS=Homo sapiens OX=9606 GN=RAC2 PE=1 SV=1	0	28.204	22	4	11	1	1	192	21.4	7.61	37.45	4	0	111.8	97.7	94.8	91	108.4	99.6	Not Found	Not Found	Not Found	Not Found	Not Found	Not Found	Not Found	High	Not Found
FALSE	High	Master Protein	Q9Y3U8	60S ribosomal protein L36 OS=Homo sapiens OX=9606 GN=RPL36 PE=1 SV=3	0	28.115	29	3	25	3	1	105	12.2	11.59	61.13	3	0	98.8	94.2	102.5	95.8	102.4	106.8	Not Found	Not Found	High	High	High	High	High	High	Not Found
FALSE	High	Master Protein	Q92734	Protein TFG OS=Homo sapiens OX=9606 GN=TFG PE=1 SV=2	0	28.093	22	5	9	5	1	400	43.4	5.1	32.64	5	0	97.4	98.6	97.6	95.3	94.3	111.4	Not Found	High	High	High	High	Not Found	Not Found	Not Found	Not Found
FALSE	High	Master Protein	P78347	General transcription factor II-I OS=Homo sapiens OX=9606 GN=GTF2I PE=1 SV=2	0	28.063	6	5	6	5	1	998	112.3	6.39	21.34	5	0	92.9	97.3	101.7	99.5	106.3	107.3	Not Found	Not Found	High	Not Found	High	Not Found	High	High	Not Found
FALSE	High	Master Protein	P60891	Ribose-phosphate pyrophosphokinase 1 OS=Homo sapiens OX=9606 GN=PRPS1 PE=1 SV=2	0	28.062	25	6	7	3	1	318	34.8	6.98	19.33	6	4	90.2	99.9	92	105.2	96.6	106.5	Not Found	Not Found	High	Not Found	Not Found	Not Found	High	High	Not Found
FALSE	High	Master Protein	P27694	Replication protein A 70 kDa DNA-binding subunit OS=Homo sapiens OX=9606 GN=RPA1 PE=1 SV=2	0	28.061	10	6	7	6	1	616	68.1	7.21	24.26	6	0	97.3	100.9	101.1	103	103.5	85.1	Not Found	Not Found	Not Found	High	Not Found	High	High	High	Not Found
FALSE	High	Master Protein	Q14767	Latent-transforming growth factor beta-binding protein 2 OS=Homo sapiens OX=9606 GN=LTBP2 PE=1 SV=3	0	28.056	5	7	7	7	1	1821	194.9	5.19	21.25	7	0	96.9	99.4	100.6	93.5	99.5	113.3	Not Found	High	Not Found	High	High	High	Not Found	High	High
FALSE	High	Master Protein	P01033	Metalloproteinase inhibitor 1 OS=Homo sapiens OX=9606 GN=TIMP1 PE=1 SV=1	0	28.055	27	4	7	4	1	207	23.2	8.1	23.85	4	0	91.5	86.7	90	93.7	104.8	134.8	Not Found	Not Found	Not Found	High	High	High	High	Not Found	Not Found
FALSE	High	Master Protein	O75521	Enoyl-CoA delta isomerase 2 OS=Homo sapiens OX=9606 GN=ECI2 PE=1 SV=4	0	28.046	14	4	5	4	1	394	43.6	9	19.53	4	0	102.1	102.5	104.7	98.5	105.6	90.6	Not Found	Not Found	Not Found	High	High	Not Found	Not Found	High	Not Found
FALSE	High	Master Protein	Q9UBR2	Cathepsin Z OS=Homo sapiens OX=9606 GN=CTSZ PE=1 SV=1	0	27.997	20	6	15	6	1	303	33.8	7.11	38.57	6	0	107.9	99.5	102.7	93.8	107.4	100.7	Not Found	Not Found	Not Found	High	High	High	High	High	Not Found
FALSE	High	Master Protein	Q9UFN0	Protein NipSnap homolog 3A OS=Homo sapiens OX=9606 GN=NIPSNAP3A PE=1 SV=2	0	27.821	27	6	7	6	1	247	28.4	9.16	21.98	6	0	107	97.1	102.2	99.2	104.8	95.6	Not Found	Not Found	Not Found	Not Found	High	High	High	High	Not Found
FALSE	High	Master Protein	O00233	26S proteasome non-ATPase regulatory subunit 9 OS=Homo sapiens OX=9606 GN=PSMD9 PE=1 SV=3	0	27.756	18	3	4	3	1	223	24.7	6.95	15.33	3	0	82.3	91	94.8	103.3	91.8	132.4	Not Found	Not Found	High	High	Not Found	High	Not Found	Not Found	Not Found
FALSE	High	Master Protein	Q9NR30	Nucleolar RNA helicase 2 OS=Homo sapiens OX=9606 GN=DDX21 PE=1 SV=5	0	27.75	10	6	7	6	1	783	87.3	9.28	22.32	6	0	100.5	101.5	96.6	97	90.2	92.8	High	High	High	Not Found	Not Found	Not Found	High	High	Not Found
FALSE	High	Master Protein	P62854	40S ribosomal protein S26 OS=Homo sapiens OX=9606 GN=RPS26 PE=1 SV=3	0	27.739	37	4	19	4	1	115	13	11	66.36	4	0	99.4	99	100	99.5	102.2	101.6	Not Found	Not Found	Not Found	High	High	High	High	Not Found	Not Found
FALSE	High	Master Protein	P23193	Transcription elongation factor A protein 1 OS=Homo sapiens OX=9606 GN=TCEA1 PE=1 SV=2	0	27.673	23	6	6	6	1	301	33.9	8.38	20.21	6	0	96.7	96.4	97.1	98.7	98.2	109.8	Not Found	Not Found	High	High	Not Found	High	Not Found	Not Found	High
FALSE	High	Master Protein	Q6NYC8	Phostensin OS=Homo sapiens OX=9606 GN=PPP1R18 PE=1 SV=1	0	27.615	15	9	12	9	1	613	67.9	5.4	32.32	9	0	97.2	92.8	101.7	98.8	100.1	108.7	Not Found	High	High	Not Found	Not Found	High	High	High	High
FALSE	High	Master Protein	Q8IYD1	Eukaryotic peptide chain release factor GTP-binding subunit ERF3B OS=Homo sapiens OX=9606 GN=GSPT2 PE=1 SV=2	0	27.591	10	7	11	1	1	628	68.8	5.43	30.06	7	0	91.8	98.2	92.8	100.8	108.2	89.3	Not Found	Not Found	Not Found	Not Found	Not Found	Not Found	High	Not Found	Not Found
FALSE	High	Master Protein	P61201	COP9 signalosome complex subunit 2 OS=Homo sapiens OX=9606 GN=COPS2 PE=1 SV=1	0	27.541	14	6	12	6	1	443	51.6	5.53	33.83	6	0	98.5	98.5	95.1	98.6	99.2	104.8	High	Not Found	High	Not Found	High	Not Found	High	High	Not Found
FALSE	High	Master Protein	Q01650	Large neutral amino acids transporter small subunit 1 OS=Homo sapiens OX=9606 GN=SLC7A5 PE=1 SV=2	0	27.54	13	6	9	6	1	507	55	7.72	28.59	6	0	109.5	104	100.3	93.9	101.5	106.8	High	High	High	High	High	High	Not Found	High	Not Found
FALSE	High	Master Protein	Q9UMX0	Ubiquilin-1 OS=Homo sapiens OX=9606 GN=UBQLN1 PE=1 SV=2	0	27.514	10	4	7	1	1	589	62.5	5.11	27.47	4	0	92.1	99.3	91.3	100.1	103.4	116.5	Not Found	Not Found	Not Found	Not Found	High	High	Not Found	Not Found	Not Found
FALSE	High	Master Protein	Q9NUQ6	SPATS2-like protein OS=Homo sapiens OX=9606 GN=SPATS2L PE=1 SV=2	0	27.513	15	6	6	6	1	558	61.7	9.64	18.65	6	0	96.8	101.7	99	98	100.4	103.3	Not Found	Not Found	High	Not Found	High	High	High	High	Not Found
FALSE	High	Master Protein	Q5T9A4	ATPase family AAA domain-containing protein 3B OS=Homo sapiens OX=9606 GN=ATAD3B PE=1 SV=1	0	27.414	12	9	11	1	1	648	72.5	9.2	25.31	9	0	114.5	110.3	94.1	81.2	106.1	97.3	Not Found	Not Found	High	Not Found	Not Found	Not Found	Not Found	Not Found	Not Found
FALSE	High	Master Protein	P02462	Collagen alpha-1(IV) chain OS=Homo sapiens OX=9606 GN=COL4A1 PE=1 SV=4	0	27.331	5	6	9	6	1	1669	160.5	8.28	28.18	6	0	100.1	103.7	102.8	103.9	93.9	102.8	Not Found	Not Found	High	High	High	Not Found	High	High	Not Found
FALSE	High	Master Protein	Q15020	Squamous cell carcinoma antigen recognized by T-cells 3 OS=Homo sapiens OX=9606 GN=SART3 PE=1 SV=1	0	27.312	6	6	7	5	1	963	109.9	5.57	21.41	6	0	102.7	103.1	104	99.3	98.8	93.7	Not Found	High	Not Found	Not Found	Not Found	High	Not Found	High	Not Found
FALSE	High	Master Protein	P60033	CD81 antigen OS=Homo sapiens OX=9606 GN=CD81 PE=1 SV=1	0	27.31	25	3	4	3	1	236	25.8	5.29	21.49	3	0	113.9	106.2	100.1	104.1	105.6	83.6	Not Found	Not Found	High	High	Not Found	Not Found	High	High	Not Found
FALSE	High	Master Protein	Q7Z3B4	Nucleoporin p54 OS=Homo sapiens OX=9606 GN=NUP54 PE=1 SV=2	0	27.292	15	6	6	6	1	507	55.4	7.02	15.58	6	0	94.8	103.1	101.4	100.9	101.6	98.5	Not Found	High	Not Found	High	High	High	High	High	Not Found
FALSE	High	Master Protein	P27487	Dipeptidyl peptidase 4 OS=Homo sapiens OX=9606 GN=DPP4 PE=1 SV=2	0	27.256	8	5	5	5	1	766	88.2	6.04	16.43	5	0	100.3	94.7	97.9	99	104.6	109	Not Found	Not Found	High	High	Not Found	High	Not Found	High	Not Found
FALSE	High	Master Protein	Q7L2H7	Eukaryotic translation initiation factor 3 subunit M OS=Homo sapiens OX=9606 GN=EIF3M PE=1 SV=1	0	27.248	19	5	6	5	1	374	42.5	5.63	23.67	5	0	84.5	104.9	87.9	102.5	101.5	115.8	Not Found	Not Found	Not Found	High	High	High	High	High	Not Found
FALSE	High	Master Protein	Q92769	Histone deacetylase 2 OS=Homo sapiens OX=9606 GN=HDAC2 PE=1 SV=2	0	27.24	14	6	7	3	1	488	55.3	5.91	19.64	6	3	98.3	93.8	98.7	99.1	105.3	103.5	Not Found	Not Found	Not Found	High	High	Not Found	Not Found	High	Not Found
FALSE	High	Master Protein	Q9UNW1	Multiple inositol polyphosphate phosphatase 1 OS=Homo sapiens OX=9606 GN=MINPP1 PE=1 SV=1	0	27.238	13	5	7	5	1	487	55	7.81	24.26	5	0	96	100.7	98.4	103.3	102.7	97.8	Not Found	High	High	Not Found	Not Found	High	Not Found	Not Found	High
FALSE	High	Master Protein	P63151	Serine/threonine-protein phosphatase 2A 55 kDa regulatory subunit B alpha isoform OS=Homo sapiens OX=9606 GN=PPP2R2A PE=1 SV=1	0	27.226	16	6	6	4	1	447	51.7	6.2	19.18	6	2	91.6	108.2	99.7	109.2	89.7	85.1	Not Found	High	Not Found	Not Found	High	Not Found	High	High	Not Found
FALSE	High	Master Protein	Q9UNF1	Melanoma-associated antigen D2 OS=Homo sapiens OX=9606 GN=MAGED2 PE=1 SV=2	0	27.169	10	5	6	4	1	606	64.9	9.32	25.38	5	1	108.6	100.4	107.2	108.8	87.7	79	Not Found	Not Found	High	High	Not Found	Not Found	Not Found	High	Not Found
FALSE	High	Master Protein	Q15758	Neutral amino acid transporter B(0) OS=Homo sapiens OX=9606 GN=SLC1A5 PE=1 SV=2	0	27.165	12	6	6	6	1	541	56.6	5.48	19.08	6	0	105	101.6	102.6	90.8	96.3	104.7	Not Found	High	High	High	High	Not Found	Not Found	High	Not Found
FALSE	High	Master Protein	P14324	Farnesyl pyrophosphate synthase OS=Homo sapiens OX=9606 GN=FDPS PE=1 SV=4	0	27.137	10	3	5	3	1	419	48.2	6.15	20.39	3	0	85.5	92.5	95.6	105.2	99.4	116.5	Not Found	High	Not Found	Not Found	High	High	High	Not Found	Not Found
FALSE	High	Master Protein	A1L0T0	2-hydroxyacyl-CoA lyase 2 OS=Homo sapiens OX=9606 GN=ILVBL PE=1 SV=2	0	27.103	14	6	8	6	1	632	67.8	8.15	24.43	6	0	101.7	103.2	101.9	98.6	98.1	101.7	High	High	Not Found	High	High	High	High	High	Not Found
FALSE	High	Master Protein	Q9BY76	Angiopoietin-related protein 4 OS=Homo sapiens OX=9606 GN=ANGPTL4 PE=1 SV=2	0	27.094	14	4	4	4	1	406	45.2	8.85	18.86	4	0	83.3	84.4	81.2	115.8	123.7	134.5	Not Found	Not Found	High	Not Found	Not Found	Not Found	High	High	Not Found
FALSE	High	Master Protein	Q9BUJ2	Heterogeneous nuclear ribonucleoprotein U-like protein 1 OS=Homo sapiens OX=9606 GN=HNRNPUL1 PE=1 SV=2	0	27.053	8	6	8	6	1	856	95.7	6.92	23.45	6	0	104.9	110.2	104	98.9	101.1	78.1	Not Found	High	Not Found	High	High	High	Not Found	Not Found	High
FALSE	High	Master Protein	Q9UKE5	TRAF2 and NCK-interacting protein kinase OS=Homo sapiens OX=9606 GN=TNIK PE=1 SV=1	0	27.015	3	4	5	1	1	1360	154.8	7.17	20.7	4	0	93.9	90.3	93	87.9	98.7	152.5	Not Found	High	Not Found	Not Found	Not Found	Not Found	Not Found	Not Found	Not Found
FALSE	High	Master Protein	P16104	Histone H2AX OS=Homo sapiens OX=9606 GN=H2AX PE=1 SV=2	0	27.008	44	7	43	3	1	143	15.1	10.74	80.61	7	4	104.2	101.1	97.6	102.9	94.9	95.9	High	Not Found	Not Found	Not Found	High	High	Not Found	High	Not Found
FALSE	High	Master Protein	Q01628	Interferon-induced transmembrane protein 3 OS=Homo sapiens OX=9606 GN=IFITM3 PE=1 SV=2	0	26.97	31	2	4	2	1	133	14.6	7.01	17.43	2	0	99.7	96.8	89.8	99.7	108.7	103.5	Not Found	Not Found	Not Found	High	High	High	Not Found	Not Found	Not Found
FALSE	High	Master Protein	O43704	Sulfotransferase 1B1 OS=Homo sapiens OX=9606 GN=SULT1B1 PE=1 SV=2	0	26.88	25	7	8	7	1	296	34.9	7.06	26.77	7	0	94	100.7	95.2	102.1	96.1	90.1	High	High	Not Found	High	High	High	High	High	Not Found
FALSE	High	Master Protein	O75964	ATP synthase subunit g, mitochondrial OS=Homo sapiens OX=9606 GN=ATP5MG PE=1 SV=3	0	26.853	39	4	10	4	1	103	11.4	9.64	44.01	4	0	122.3	95.8	84.7	92.3	128.6	98.9	Not Found	Not Found	Not Found	High	High	Not Found	High	High	Not Found
FALSE	High	Master Protein	Q9BWS9	Chitinase domain-containing protein 1 OS=Homo sapiens OX=9606 GN=CHID1 PE=1 SV=1	0	26.833	17	5	6	5	1	393	44.9	8.63	21.1	5	0	109.3	101.2	97.5	95.7	106.1	92.7	Not Found	High	High	Not Found	High	High	High	Not Found	Not Found
FALSE	High	Master Protein	P42025	Beta-centractin OS=Homo sapiens OX=9606 GN=ACTR1B PE=1 SV=1	0	26.797	21	7	10	1	1	376	42.3	6.4	28.89	7	0	113.8	97.3	84	94.5	110	117.6	Not Found	Not Found	Not Found	Not Found	High	High	Not Found	Not Found	Not Found
FALSE	High	Master Protein	Q9Y6Y8	SEC23-interacting protein OS=Homo sapiens OX=9606 GN=SEC23IP PE=1 SV=1	0	26.787	9	9	14	8	1	1000	111	5.54	32.89	9	0	96.2	97.5	100.4	101.4	100	100.1	Not Found	High	High	Not Found	High	High	High	High	Not Found
FALSE	High	Master Protein	P37108	Signal recognition particle 14 kDa protein OS=Homo sapiens OX=9606 GN=SRP14 PE=1 SV=2	0	26.783	36	6	13	6	1	136	14.6	10.04	48.38	6	0	100.4	100.5	101.7	106.8	107.8	88	Not Found	Not Found	Not Found	Not Found	High	High	High	High	Not Found
FALSE	High	Master Protein	Q9H4G0	Band 4.1-like protein 1 OS=Homo sapiens OX=9606 GN=EPB41L1 PE=1 SV=2	0	26.729	11	8	8	8	1	881	98.4	5.62	25.83	8	0	95.1	96.7	99.2	105	104.4	104.4	Not Found	Not Found	Not Found	High	High	High	Not Found	High	Not Found
FALSE	High	Master Protein	P50897	Palmitoyl-protein thioesterase 1 OS=Homo sapiens OX=9606 GN=PPT1 PE=1 SV=1	0	26.657	12	4	5	4	1	306	34.2	6.52	17.99	4	0	107.8	89.2	100.7	94.1	108.1	114.1	Not Found	High	High	High	Not Found	High	Not Found	High	Not Found
FALSE	High	Master Protein	Q9NSK0	Kinesin light chain 4 OS=Homo sapiens OX=9606 GN=KLC4 PE=1 SV=3	0	26.638	11	6	6	2	1	619	68.6	6.18	19.55	6	0	89.7	99.4	92.4	91.8	101.3	135.1	Not Found	High	Not Found	High	Not Found	Not Found	Not Found	Not Found	Not Found
FALSE	High	Master Protein	P46108	Adapter molecule crk OS=Homo sapiens OX=9606 GN=CRK PE=1 SV=2	0	26.635	31	6	7	6	1	304	33.8	5.55	22.1	6	0	89.7	98.2	95.1	94.8	97.3	117.8	High	High	High	Not Found	High	High	Not Found	High	Not Found
FALSE	High	Master Protein	Q15428	Splicing factor 3A subunit 2 OS=Homo sapiens OX=9606 GN=SF3A2 PE=1 SV=2	0	26.633	17	5	5	5	1	464	49.2	9.64	19.32	5	0	102.4	99.8	104.6	104.5	95.1	89.6	Not Found	High	High	Not Found	Not Found	Not Found	High	Not Found	Not Found
FALSE	High	Master Protein	P04439	HLA class I histocompatibility antigen, A alpha chain OS=Homo sapiens OX=9606 GN=HLA-A PE=1 SV=2	0	26.612	19	4	5	1	1	365	40.8	6	21.2	4	1	97.4	113.3	97.2	118.6	114.1	83.8	Not Found	Not Found	Not Found	Not Found	Not Found	High	Not Found	Not Found	Not Found
FALSE	High	Master Protein	Q12841	Follistatin-related protein 1 OS=Homo sapiens OX=9606 GN=FSTL1 PE=1 SV=1	0	26.606	25	7	11	7	1	308	35	5.52	30.71	7	0	104.1	101.1	103.2	100.4	99.7	94.1	High	High	Not Found	High	High	High	Not Found	Not Found	High
FALSE	High	Master Protein	Q9BQE5	Apolipoprotein L2 OS=Homo sapiens OX=9606 GN=APOL2 PE=1 SV=1	0	26.603	20	7	8	7	1	337	37.1	6.74	22.7	7	0	104.3	103.7	94.9	101.7	102.5	101.3	High	High	Not Found	High	High	Not Found	Not Found	High	Not Found
FALSE	High	Master Protein	Q9H299	SH3 domain-binding glutamic acid-rich-like protein 3 OS=Homo sapiens OX=9606 GN=SH3BGRL3 PE=1 SV=1	0	26.575	47	5	18	5	1	93	10.4	4.93	54.51	5	0	88.8	95.2	91.6	107.4	87.5	115.2	High	High	Not Found	High	High	High	High	High	High
FALSE	High	Master Protein	Q8IWX8	Calcium homeostasis endoplasmic reticulum protein OS=Homo sapiens OX=9606 GN=CHERP PE=1 SV=3	0	26.515	6	5	5	5	1	916	103.6	9.04	18.54	5	0	95.4	92.4	97.3	87.1	101	137.8	Not Found	Not Found	High	High	Not Found	Not Found	Not Found	High	Not Found
FALSE	High	Master Protein	P26583	High mobility group protein B2 OS=Homo sapiens OX=9606 GN=HMGB2 PE=1 SV=2	0	26.499	28	5	7	4	1	209	24	7.81	22.7	5	0	99.5	97.1	103.9	103.9	95.4	86.2	Not Found	Not Found	Not Found	High	High	High	Not Found	Not Found	Not Found
FALSE	High	Master Protein	P62851	40S ribosomal protein S25 OS=Homo sapiens OX=9606 GN=RPS25 PE=1 SV=1	0	26.494	38	6	14	6	1	125	13.7	10.11	41.92	6	0	98.8	95.7	103.4	98.6	101.4	103.6	High	Not Found	Not Found	High	Not Found	High	High	High	High
FALSE	High	Master Protein	O95168	NADH dehydrogenase [ubiquinone] 1 beta subcomplex subunit 4 OS=Homo sapiens OX=9606 GN=NDUFB4 PE=1 SV=3	0	26.489	40	4	5	4	1	129	15.2	9.85	20.82	4	0	96.2	95	99	100.2	105.5	105	Not Found	Not Found	High	High	Not Found	High	Not Found	High	Not Found
FALSE	High	Master Protein	P04908	Histone H2A type 1-B/E OS=Homo sapiens OX=9606 GN=H2AC4 PE=1 SV=2	0	26.482	38	5	45	2	1	130	14.1	11.05	91.97	5	0	96.1	100.9	93.6	77.8	118.3	82.8	Not Found	Not Found	Not Found	Not Found	Not Found	High	High	High	Not Found
FALSE	High	Master Protein	P49321	Nuclear autoantigenic sperm protein OS=Homo sapiens OX=9606 GN=NASP PE=1 SV=2	0	26.448	11	6	7	6	1	788	85.2	4.3	24.39	6	0	100.8	95.1	97.8	89.7	99.8	113.9	Not Found	High	High	High	Not Found	High	Not Found	High	Not Found
FALSE	High	Master Protein	Q96QD8	Sodium-coupled neutral amino acid transporter 2 OS=Homo sapiens OX=9606 GN=SLC38A2 PE=1 SV=2	0	26.412	17	5	6	5	1	506	56	8	24.88	5	0	99.1	95.3	101.9	101.4	97.6	94.4	Not Found	Not Found	Not Found	High	High	High	High	High	Not Found
FALSE	High	Master Protein	Q15404	Ras suppressor protein 1 OS=Homo sapiens OX=9606 GN=RSU1 PE=1 SV=3	0	26.376	28	7	9	7	1	277	31.5	8.65	24.54	7	0	95.2	101.6	95.3	101.2	101.4	94	High	Not Found	Not Found	High	High	High	High	High	Not Found
FALSE	High	Master Protein	Q86V81	THO complex subunit 4 OS=Homo sapiens OX=9606 GN=ALYREF PE=1 SV=3	0	26.368	23	5	7	5	1	257	26.9	11.15	26.55	5	0	98.7	89.7	90.9	98.2	96.9	125.4	Not Found	High	High	High	High	Not Found	Not Found	Not Found	Not Found
FALSE	High	Master Protein	O75410	Transforming acidic coiled-coil-containing protein 1 OS=Homo sapiens OX=9606 GN=TACC1 PE=1 SV=2	0	26.343	9	6	7	6	1	805	87.7	4.88	25.49	6	0	97.2	104.2	100	99.4	98.4	96.5	Not Found	High	High	High	Not Found	Not Found	Not Found	High	Not Found
FALSE	High	Master Protein	Q96EP5	DAZ-associated protein 1 OS=Homo sapiens OX=9606 GN=DAZAP1 PE=1 SV=1	0	26.33	22	5	6	5	1	407	43.4	8.56	21.67	5	0	102.1	94.9	100.1	96.3	100.1	111.3	Not Found	Not Found	Not Found	Not Found	High	High	High	Not Found	Not Found
FALSE	High	Master Protein	P62857	40S ribosomal protein S28 OS=Homo sapiens OX=9606 GN=RPS28 PE=1 SV=1	0	26.291	46	3	32	3	1	69	7.8	10.7	95.96	3	0	106.6	101.6	104.2	98.7	95.9	90.3	Not Found	High	High	High	High	High	High	High	Not Found
FALSE	High	Master Protein	Q9BZH6	WD repeat-containing protein 11 OS=Homo sapiens OX=9606 GN=WDR11 PE=1 SV=1	0	26.286	5	5	5	5	1	1224	136.6	6.92	18.78	5	0	99.6	83.7	101.6	88	103	134.3	Not Found	High	High	High	Not Found	Not Found	High	Not Found	Not Found
FALSE	High	Master Protein	P36551	Oxygen-dependent coproporphyrinogen-III oxidase, mitochondrial OS=Homo sapiens OX=9606 GN=CPOX PE=1 SV=3	0	26.285	15	5	6	5	1	454	50.1	8.25	20.36	5	0	97.3	91.9	96.5	94.8	107.9	132.4	High	Not Found	High	High	High	Not Found	Not Found	High	Not Found
FALSE	High	Master Protein	O43402	ER membrane protein complex subunit 8 OS=Homo sapiens OX=9606 GN=EMC8 PE=1 SV=1	0	26.268	30	6	6	6	1	210	23.8	6.4	21.81	6	0	99.3	99	105.1	100.6	100	100.7	Not Found	Not Found	High	Not Found	High	High	High	Not Found	Not Found
FALSE	High	Master Protein	Q96A26	Protein FAM162A OS=Homo sapiens OX=9606 GN=FAM162A PE=1 SV=2	0	26.215	35	5	12	5	1	154	17.3	9.77	42	5	0	111.4	94.4	98.1	97.2	113.9	97.5	Not Found	High	High	Not Found	High	High	High	High	Not Found
FALSE	High	Master Protein	Q8N1F7	Nuclear pore complex protein Nup93 OS=Homo sapiens OX=9606 GN=NUP93 PE=1 SV=2	0	26.213	9	7	7	7	1	819	93.4	5.72	20.14	7	0	99	99.3	101.4	97.3	101.3	103.1	Not Found	Not Found	High	Not Found	High	Not Found	Not Found	High	Not Found
FALSE	High	Master Protein	Q9H444	Charged multivesicular body protein 4b OS=Homo sapiens OX=9606 GN=CHMP4B PE=1 SV=1	0	26.118	29	7	9	7	1	224	24.9	4.82	26.54	7	0	94.6	95.1	103.6	95.8	96.1	99.9	Not Found	Not Found	High	Not Found	Not Found	High	Not Found	High	Not Found
FALSE	High	Master Protein	O43920	NADH dehydrogenase [ubiquinone] iron-sulfur protein 5 OS=Homo sapiens OX=9606 GN=NDUFS5 PE=1 SV=3	0	26.093	51	5	6	5	1	106	12.5	9.14	22.21	5	0	102.9	97.3	103.4	94.2	107.2	99.6	Not Found	Not Found	Not Found	High	High	High	High	Not Found	Not Found
FALSE	High	Master Protein	Q9NVJ2	ADP-ribosylation factor-like protein 8B OS=Homo sapiens OX=9606 GN=ARL8B PE=1 SV=1	0	26.085	44	6	7	6	1	186	21.5	8.43	19.39	6	0	96.9	97.4	98.5	104.6	102.6	96	Not Found	Not Found	High	Not Found	High	Not Found	High	Not Found	High
FALSE	High	Master Protein	P31937	3-hydroxyisobutyrate dehydrogenase, mitochondrial OS=Homo sapiens OX=9606 GN=HIBADH PE=1 SV=2	0	26.045	20	4	5	4	1	336	35.3	8.13	22.98	4	0	103.4	101.3	101.9	96.2	109.8	101.4	Not Found	High	High	High	Not Found	Not Found	High	High	Not Found
FALSE	High	Master Protein	Q9Y608	Leucine-rich repeat flightless-interacting protein 2 OS=Homo sapiens OX=9606 GN=LRRFIP2 PE=1 SV=1	0	26.029	7	5	9	4	1	721	82.1	6.95	25.07	5	0	93	100.9	99.3	101.9	98.3	103.3	High	High	High	Not Found	Not Found	Not Found	Not Found	Not Found	High
FALSE	High	Master Protein	P30566	Adenylosuccinate lyase OS=Homo sapiens OX=9606 GN=ADSL PE=1 SV=2	0	26.026	12	5	6	5	1	484	54.9	7.11	21.76	5	0	95.6	100.3	97.6	103	94.9	100.2	Not Found	Not Found	High	Not Found	High	High	High	High	Not Found
FALSE	High	Master Protein	O15031	Plexin-B2 OS=Homo sapiens OX=9606 GN=PLXNB2 PE=1 SV=3	0	26.012	4	8	9	8	1	1838	205	6.24	24.14	8	0	101.6	97.2	98.6	100.2	106.2	117.8	Not Found	High	High	Not Found	High	High	High	Not Found	Not Found
FALSE	High	Master Protein	P26885	Peptidyl-prolyl cis-trans isomerase FKBP2 OS=Homo sapiens OX=9606 GN=FKBP2 PE=1 SV=2	0	25.985	44	7	8	7	1	142	15.6	9.13	17.42	7	0	102.4	97.3	98.8	92.8	102.6	106.7	Not Found	Not Found	Not Found	Not Found	High	High	High	Not Found	Not Found
FALSE	High	Master Protein	Q99426	Tubulin-folding cofactor B OS=Homo sapiens OX=9606 GN=TBCB PE=1 SV=2	0	25.983	23	6	8	6	1	244	27.3	5.15	24.92	6	0	96.4	97.5	97.1	98.2	95.2	108	Not Found	High	Not Found	Not Found	High	High	High	Not Found	High
FALSE	High	Master Protein	P22570	NADPH:adrenodoxin oxidoreductase, mitochondrial OS=Homo sapiens OX=9606 GN=FDXR PE=1 SV=3	0	25.962	16	7	8	7	1	491	53.8	8.44	25.31	7	0	105.2	95.9	94.4	90.8	108.4	119.1	High	High	High	High	Not Found	Not Found	High	High	Not Found
FALSE	High	Master Protein	Q14498	RNA-binding protein 39 OS=Homo sapiens OX=9606 GN=RBM39 PE=1 SV=2	0	25.878	11	4	4	4	1	530	59.3	10.1	17.36	4	0	100	101.4	104.5	103.5	99.7	84	Not Found	High	Not Found	Not Found	High	High	High	Not Found	Not Found
FALSE	High	Master Protein	O43747	AP-1 complex subunit gamma-1 OS=Homo sapiens OX=9606 GN=AP1G1 PE=1 SV=5	0	25.873	9	7	11	7	1	822	91.3	6.8	32.6	7	0	100.3	99.8	100.7	99.2	101	95.3	Not Found	Not Found	High	High	High	High	High	High	Not Found
FALSE	High	Master Protein	Q9UBW8	COP9 signalosome complex subunit 7a OS=Homo sapiens OX=9606 GN=COPS7A PE=1 SV=1	0	25.861	19	4	5	4	1	275	30.3	8.22	16.71	4	0	94.9	92.2	90.9	95.4	102.4	126.5	High	High	Not Found	High	High	Not Found	High	Not Found	Not Found
FALSE	High	Master Protein	Q9GZY8	Mitochondrial fission factor OS=Homo sapiens OX=9606 GN=MFF PE=1 SV=1	0	25.84	16	3	7	3	1	342	38.4	8.95	20.86	3	0	103.3	97.3	94.7	89.2	100.3	126.4	Not Found	High	High	High	High	High	High	Not Found	Not Found
FALSE	High	Master Protein	O75380	NADH dehydrogenase [ubiquinone] iron-sulfur protein 6, mitochondrial OS=Homo sapiens OX=9606 GN=NDUFS6 PE=1 SV=1	0	25.753	39	4	4	4	1	124	13.7	8.28	14.47	4	0	100.6	100.3	100.5	98.7	100.3	98.5	Not Found	Not Found	Not Found	High	Not Found	High	Not Found	Not Found	Not Found
FALSE	High	Master Protein	P16930	Fumarylacetoacetase OS=Homo sapiens OX=9606 GN=FAH PE=1 SV=2	0	25.652	15	6	9	6	1	419	46.3	6.95	27.16	6	0	93.1	97.5	97.8	100.1	100.1	102.5	Not Found	Not Found	Not Found	Not Found	High	High	High	High	Not Found
FALSE	High	Master Protein	Q9UBC2	Epidermal growth factor receptor substrate 15-like 1 OS=Homo sapiens OX=9606 GN=EPS15L1 PE=1 SV=1	0	25.629	8	5	5	5	1	864	94.2	5.11	16.43	5	0	97.4	104	93.1	99.5	99	101.7	High	Not Found	Not Found	High	Not Found	Not Found	High	High	Not Found
FALSE	High	Master Protein	Q8NFW8	N-acylneuraminate cytidylyltransferase OS=Homo sapiens OX=9606 GN=CMAS PE=1 SV=2	0	25.611	12	4	4	4	1	434	48.3	7.93	16.46	4	0	92.7	92.3	102.5	98.4	105.5	128.7	Not Found	Not Found	High	High	Not Found	High	Not Found	Not Found	Not Found
FALSE	High	Master Protein	P28072	Proteasome subunit beta type-6 OS=Homo sapiens OX=9606 GN=PSMB6 PE=1 SV=4	0	25.586	27	6	12	6	1	239	25.3	4.92	37.26	6	0	97	99.2	97.5	102	95.1	108.3	Not Found	High	High	High	High	High	High	High	Not Found
FALSE	High	Master Protein	Q15185	Prostaglandin E synthase 3 OS=Homo sapiens OX=9606 GN=PTGES3 PE=1 SV=1	0	25.562	34	5	9	5	1	160	18.7	4.54	32.46	5	0	96.9	105.1	105.8	102.1	92.7	83.2	Not Found	Not Found	Not Found	High	High	High	High	High	Not Found
FALSE	High	Master Protein	Q9Y282	Endoplasmic reticulum-Golgi intermediate compartment protein 3 OS=Homo sapiens OX=9606 GN=ERGIC3 PE=1 SV=1	0	25.505	17	6	6	6	1	383	43.2	6.06	18.4	6	0	106.2	109.6	98.7	101.9	98.2	101.4	High	High	High	Not Found	Not Found	Not Found	Not Found	High	Not Found
FALSE	High	Master Protein	Q16576	Histone-binding protein RBBP7 OS=Homo sapiens OX=9606 GN=RBBP7 PE=1 SV=1	0	25.426	18	6	10	3	1	425	47.8	5.05	25.89	6	0	95.9	98.6	92.3	78.5	106.6	128.1	High	Not Found	Not Found	High	Not Found	High	Not Found	Not Found	Not Found
FALSE	High	Master Protein	Q9UK41	Vacuolar protein sorting-associated protein 28 homolog OS=Homo sapiens OX=9606 GN=VPS28 PE=1 SV=1	0	25.321	22	4	6	4	1	221	25.4	5.54	20.63	4	0	87.7	90.9	88.3	92.3	97.8	147.2	Not Found	High	High	High	Not Found	Not Found	Not Found	Not Found	Not Found
FALSE	High	Master Protein	O15258	Protein RER1 OS=Homo sapiens OX=9606 GN=RER1 PE=1 SV=1	0	25.32	24	4	8	4	1	196	22.9	9.54	23.13	4	0	98.9	96	99.9	96.7	104.5	117.3	Not Found	Not Found	High	Not Found	High	Not Found	High	High	Not Found
FALSE	High	Master Protein	Q92890	Ubiquitin recognition factor in ER-associated degradation protein 1 OS=Homo sapiens OX=9606 GN=UFD1 PE=1 SV=3	0	25.297	19	4	6	4	1	307	34.5	6.7	21.58	4	0	97	99.5	98.2	98.9	96.9	107.4	Not Found	High	Not Found	Not Found	High	High	Not Found	High	Not Found
FALSE	High	Master Protein	O00161	Synaptosomal-associated protein 23 OS=Homo sapiens OX=9606 GN=SNAP23 PE=1 SV=1	0	25.279	30	4	7	4	1	211	23.3	5.01	27.56	4	0	107.9	114.8	98	105.8	98.9	91.9	Not Found	High	Not Found	High	High	High	Not Found	Not Found	Not Found
FALSE	High	Master Protein	Q96DB5	Regulator of microtubule dynamics protein 1 OS=Homo sapiens OX=9606 GN=RMDN1 PE=1 SV=1	0	25.268	22	6	7	6	1	314	35.8	8.5	21.6	6	0	102.7	93.9	102.4	98.1	101.1	104.7	Not Found	High	High	High	Not Found	Not Found	High	High	Not Found
FALSE	High	Master Protein	P05997	Collagen alpha-2(V) chain OS=Homo sapiens OX=9606 GN=COL5A2 PE=1 SV=3	0	25.246	5	6	7	6	1	1499	144.8	6.46	22.17	6	0	116.8	110.6	116.8	84.2	92.8	107.8	Not Found	High	High	High	High	High	Not Found	Not Found	Not Found
FALSE	High	Master Protein	O75306	NADH dehydrogenase [ubiquinone] iron-sulfur protein 2, mitochondrial OS=Homo sapiens OX=9606 GN=NDUFS2 PE=1 SV=2	0	25.226	16	5	9	5	1	463	52.5	7.55	29.07	5	0	97.7	89.7	89.7	93.8	107.4	134.5	Not Found	Not Found	Not Found	High	High	High	High	High	Not Found
FALSE	High	Master Protein	O43795	Unconventional myosin-Ib OS=Homo sapiens OX=9606 GN=MYO1B PE=1 SV=3	0	25.186	7	6	7	6	1	1136	131.9	9.38	21.55	6	0	100.9	101.5	98.5	100.1	102.2	104.1	Not Found	Not Found	Not Found	High	High	High	High	Not Found	Not Found
FALSE	High	Master Protein	Q6IAA8	Ragulator complex protein LAMTOR1 OS=Homo sapiens OX=9606 GN=LAMTOR1 PE=1 SV=2	0	25.163	32	4	5	4	1	161	17.7	5.15	21.66	4	0	87.1	94.8	97.9	110.9	101.8	111.3	Not Found	High	High	High	Not Found	Not Found	High	High	Not Found
FALSE	High	Master Protein	P61081	NEDD8-conjugating enzyme Ubc12 OS=Homo sapiens OX=9606 GN=UBE2M PE=1 SV=1	0	25.093	36	6	10	6	1	183	20.9	7.69	33.75	6	0	88.3	98.8	94.8	106.8	98.1	108.9	Not Found	High	Not Found	High	High	High	High	Not Found	Not Found
FALSE	High	Master Protein	Q8IZP0	Abl interactor 1 OS=Homo sapiens OX=9606 GN=ABI1 PE=1 SV=4	0	25.088	11	4	5	3	1	508	55	7.06	16.05	4	1	95.5	101.9	100.8	99.2	102.2	93.6	Not Found	High	Not Found	Not Found	Not Found	High	Not Found	Not Found	Not Found
FALSE	High	Master Protein	P20340	Ras-related protein Rab-6A OS=Homo sapiens OX=9606 GN=RAB6A PE=1 SV=3	0	24.936	22	4	8	3	1	208	23.6	5.54	27.64	4	0	100.3	98.3	103.1	95.7	105.6	114.1	High	Not Found	Not Found	High	High	Not Found	High	Not Found	Not Found
FALSE	High	Master Protein	P02774	Vitamin D-binding protein OS=Homo sapiens OX=9606 GN=GC PE=1 SV=2	0	24.92	11	4	7	4	1	474	52.9	5.45	30.87	4	0	63.4	93.3	95.6	122.3	84.5	95.9	Not Found	Not Found	High	High	High	Not Found	Not Found	High	Not Found
FALSE	High	Master Protein	Q96EE3	Nucleoporin SEH1 OS=Homo sapiens OX=9606 GN=SEH1L PE=1 SV=3	0	24.877	18	5	5	5	1	360	39.6	8.09	18.37	5	0	90.9	99.6	94.9	101.3	103.8	113.1	Not Found	Not Found	Not Found	Not Found	High	Not Found	High	Not Found	Not Found
FALSE	High	Master Protein	Q9NQ29	Putative RNA-binding protein Luc7-like 1 OS=Homo sapiens OX=9606 GN=LUC7L PE=1 SV=1	0	24.856	16	6	8	1	1	371	43.7	9.92	24.58	6	0	87.9	91.6	99.9	84.6	95	126.1	Not Found	Not Found	Not Found	Not Found	Not Found	High	Not Found	Not Found	Not Found
FALSE	High	Master Protein	Q15836	Vesicle-associated membrane protein 3 OS=Homo sapiens OX=9606 GN=VAMP3 PE=1 SV=3	0	24.809	40	3	6	3	1	100	11.3	8.79	23.05	3	0	108.1	97.2	101.5	94.8	106.6	115	High	High	Not Found	High	High	Not Found	Not Found	Not Found	Not Found
FALSE	High	Master Protein	O95336	6-phosphogluconolactonase OS=Homo sapiens OX=9606 GN=PGLS PE=1 SV=2	0	24.798	27	5	6	5	1	258	27.5	6.05	22.57	5	0	86.7	92.5	95.7	102.7	97.5	111.7	Not Found	Not Found	Not Found	High	Not Found	High	High	Not Found	Not Found
FALSE	High	Master Protein	P48739	Phosphatidylinositol transfer protein beta isoform OS=Homo sapiens OX=9606 GN=PITPNB PE=1 SV=2	0	24.798	25	7	8	6	1	271	31.5	6.87	22.9	7	1	96.3	99.6	97	102.3	98.1	98.5	Not Found	Not Found	High	High	Not Found	High	Not Found	High	High
FALSE	High	Master Protein	P01889	HLA class I histocompatibility antigen, B alpha chain OS=Homo sapiens OX=9606 GN=HLA-B PE=1 SV=3	0	24.798	16	4	5	1	1	362	40.4	5.85	20.77	4	2	94.9	90.5	91.8	100.8	106.2	135.4	Not Found	Not Found	Not Found	High	Not Found	Not Found	Not Found	Not Found	Not Found
FALSE	High	Master Protein	Q15369	Elongin-C OS=Homo sapiens OX=9606 GN=ELOC PE=1 SV=1	0	24.711	58	5	6	5	1	112	12.5	4.78	20.46	5	0	100.9	104.8	104.9	98.8	93.6	92.8	Not Found	Not Found	Not Found	High	High	High	Not Found	Not Found	Not Found
FALSE	High	Master Protein	Q15643	Thyroid receptor-interacting protein 11 OS=Homo sapiens OX=9606 GN=TRIP11 PE=1 SV=3	0	24.681	3	5	5	5	1	1979	227.4	5.26	14.76	5	0	100.4	101.7	97.6	100.2	98.5	104	Not Found	High	High	Not Found	Not Found	High	Not Found	Not Found	Not Found
FALSE	High	Master Protein	O60884	DnaJ homolog subfamily A member 2 OS=Homo sapiens OX=9606 GN=DNAJA2 PE=1 SV=1	0	24.669	16	5	6	5	1	412	45.7	6.48	22.44	5	0	98.4	103.5	100.9	106.9	92.3	86.8	Not Found	High	Not Found	High	High	High	Not Found	Not Found	Not Found
FALSE	High	Master Protein	P61923	Coatomer subunit zeta-1 OS=Homo sapiens OX=9606 GN=COPZ1 PE=1 SV=1	0	24.662	32	4	5	4	1	177	20.2	4.81	20.27	4	0	88.6	93.7	91.9	102	103	107	Not Found	Not Found	Not Found	High	High	Not Found	Not Found	Not Found	Not Found
FALSE	High	Master Protein	P18583	Protein SON OS=Homo sapiens OX=9606 GN=SON PE=1 SV=4	0	24.66	3	5	5	5	1	2426	263.7	5.64	20.46	5	0	103.1	100.3	99.7	94.7	106.7	94.4	Not Found	Not Found	High	High	High	Not Found	Not Found	Not Found	Not Found
FALSE	High	Master Protein	P31749	RAC-alpha serine/threonine-protein kinase OS=Homo sapiens OX=9606 GN=AKT1 PE=1 SV=2	0	24.63	13	5	6	5	1	480	55.7	6.07	19.7	5	0	92.1	100.7	97.1	103.3	96.9	99.2	Not Found	High	High	Not Found	High	Not Found	High	Not Found	Not Found
FALSE	High	Master Protein	P45973	Chromobox protein homolog 5 OS=Homo sapiens OX=9606 GN=CBX5 PE=1 SV=1	0	24.613	37	6	7	5	1	191	22.2	5.86	22.49	6	0	104.4	105.8	100.1	100.6	98.4	96.5	Not Found	Not Found	High	High	High	High	High	Not Found	Not Found
FALSE	High	Master Protein	O43633	Charged multivesicular body protein 2a OS=Homo sapiens OX=9606 GN=CHMP2A PE=1 SV=1	0	24.602	24	5	7	5	1	222	25.1	5.97	20.85	5	0	96.8	99.9	101.3	107.8	97.6	90.9	Not Found	Not Found	High	High	Not Found	High	High	Not Found	Not Found
FALSE	High	Master Protein	Q9UBF2	Coatomer subunit gamma-2 OS=Homo sapiens OX=9606 GN=COPG2 PE=1 SV=1	0	24.59	7	5	7	2	1	871	97.6	5.81	19.52	5	0	93.3	97.8	96.7	94.4	97.9	118	Not Found	High	Not Found	Not Found	High	Not Found	Not Found	Not Found	Not Found
FALSE	High	Master Protein	P19525	Interferon-induced, double-stranded RNA-activated protein kinase OS=Homo sapiens OX=9606 GN=EIF2AK2 PE=1 SV=2	0	24.59	15	7	7	7	1	551	62.1	8.4	21.18	7	0	99.4	101.3	98.9	97.1	102.4	98.1	Not Found	Not Found	High	Not Found	High	Not Found	High	High	Not Found
FALSE	High	Master Protein	P14854	Cytochrome c oxidase subunit 6B1 OS=Homo sapiens OX=9606 GN=COX6B1 PE=1 SV=2	0	24.59	66	5	10	5	1	86	10.2	7.05	31.04	5	0	102.8	96.3	101.5	96	101.9	108.8	Not Found	Not Found	Not Found	High	High	High	High	High	Not Found
FALSE	High	Master Protein	Q92599	Septin-8 OS=Homo sapiens OX=9606 GN=SEPTIN8 PE=1 SV=4	0	24.573	12	5	8	1	1	483	55.7	6.28	26.28	5	0	97.6	97	95.6	96.1	100.6	106.5	Not Found	Not Found	Not Found	Not Found	Not Found	High	Not Found	Not Found	Not Found
FALSE	High	Master Protein	O00487	26S proteasome non-ATPase regulatory subunit 14 OS=Homo sapiens OX=9606 GN=PSMD14 PE=1 SV=1	0	24.552	14	5	9	5	1	310	34.6	6.52	22.08	5	0	100	103	101	99	100.2	92.6	Not Found	Not Found	Not Found	High	High	High	Not Found	High	Not Found
FALSE	High	Master Protein	O43488	Aflatoxin B1 aldehyde reductase member 2 OS=Homo sapiens OX=9606 GN=AKR7A2 PE=1 SV=3	0	24.539	22	7	7	7	1	359	39.6	7.17	23.69	7	0	95.4	100.3	99	101.4	98.5	94.9	Not Found	Not Found	Not Found	Not Found	High	High	Not Found	High	Not Found
FALSE	High	Master Protein	Q66K74	Microtubule-associated protein 1S OS=Homo sapiens OX=9606 GN=MAP1S PE=1 SV=2	0	24.536	8	7	9	7	1	1059	112.1	7.3	25.04	7	0	89.2	99.9	93.7	101.7	98.9	111.2	Not Found	High	High	High	Not Found	High	Not Found	High	Not Found
FALSE	High	Master Protein	Q96M96	FYVE, RhoGEF and PH domain-containing protein 4 OS=Homo sapiens OX=9606 GN=FGD4 PE=1 SV=2	0	24.522	12	8	8	8	1	766	86.6	6.13	22.62	8	0	92.7	94.7	94.5	100.4	103.1	104.3	Not Found	Not Found	Not Found	High	Not Found	High	High	High	Not Found
FALSE	High	Master Protein	P53680	AP-2 complex subunit sigma OS=Homo sapiens OX=9606 GN=AP2S1 PE=1 SV=2	0	24.514	39	5	5	5	1	142	17	6.18	17.84	5	0	84.1	98.5	90.6	113.2	94.5	119.5	Not Found	Not Found	Not Found	Not Found	High	High	Not Found	Not Found	Not Found
FALSE	High	Master Protein	O75822	Eukaryotic translation initiation factor 3 subunit J OS=Homo sapiens OX=9606 GN=EIF3J PE=1 SV=2	0	24.5	20	4	5	4	1	258	29	4.83	19.44	4	0	99.9	109.8	101.2	98	92	92.2	Not Found	Not Found	Not Found	High	High	High	High	Not Found	Not Found
FALSE	High	Master Protein	Q9BXP5	Serrate RNA effector molecule homolog OS=Homo sapiens OX=9606 GN=SRRT PE=1 SV=1	0	24.497	9	6	6	6	1	876	100.6	5.96	19.16	6	0	95	97.6	97.5	98.6	100.9	103.6	Not Found	High	High	High	Not Found	Not Found	High	High	Not Found
FALSE	High	Master Protein	O14672	Disintegrin and metalloproteinase domain-containing protein 10 OS=Homo sapiens OX=9606 GN=ADAM10 PE=1 SV=1	0	24.483	11	5	6	5	1	748	84.1	7.77	21.19	5	0	106.1	102.1	102.2	100.4	110.2	93.3	Not Found	Not Found	High	Not Found	High	High	High	High	Not Found
FALSE	High	Master Protein	Q7RTV0	PHD finger-like domain-containing protein 5A OS=Homo sapiens OX=9606 GN=PHF5A PE=1 SV=1	0	24.449	48	5	11	5	1	110	12.4	8.41	32.26	5	0	101.8	98	100.7	96.6	102.7	97.5	Not Found	High	Not Found	High	Not Found	High	High	High	Not Found
FALSE	High	Master Protein	P63220	40S ribosomal protein S21 OS=Homo sapiens OX=9606 GN=RPS21 PE=1 SV=1	0	24.447	48	4	19	4	1	83	9.1	8.5	51	4	0	102.5	100.1	98.5	99.4	97.3	100.5	High	High	High	High	High	High	High	Not Found	Not Found
FALSE	High	Master Protein	Q16836	Hydroxyacyl-coenzyme A dehydrogenase, mitochondrial OS=Homo sapiens OX=9606 GN=HADH PE=1 SV=3	0	24.414	23	7	9	7	1	314	34.3	8.85	27.49	7	0	108.7	105.5	104	100	98.3	90.9	Not Found	Not Found	High	Not Found	High	High	High	Not Found	Not Found
FALSE	High	Master Protein	P61020	Ras-related protein Rab-5B OS=Homo sapiens OX=9606 GN=RAB5B PE=1 SV=1	0	24.389	21	4	5	2	1	215	23.7	8.13	18.17	4	0	109.2	95	101.1	97.1	100	109.4	Not Found	Not Found	High	High	Not Found	Not Found	Not Found	Not Found	Not Found
FALSE	High	Master Protein	P49590	Histidine--tRNA ligase, mitochondrial OS=Homo sapiens OX=9606 GN=HARS2 PE=1 SV=1	0	24.386	11	6	8	1	1	506	56.9	8.24	23.42	6	0	106.4	102	92.1	96.3	99.3	102.3	Not Found	Not Found	Not Found	Not Found	High	Not Found	Not Found	Not Found	Not Found
FALSE	High	Master Protein	Q13242	Serine/arginine-rich splicing factor 9 OS=Homo sapiens OX=9606 GN=SRSF9 PE=1 SV=1	0	24.273	25	5	7	5	1	221	25.5	8.65	22.31	5	0	98.9	94.8	96.2	88.2	102.6	136.7	High	High	High	Not Found	Not Found	Not Found	Not Found	High	Not Found
FALSE	High	Master Protein	O43583	Density-regulated protein OS=Homo sapiens OX=9606 GN=DENR PE=1 SV=2	0	24.243	26	4	8	4	1	198	22.1	5.3	25.64	4	0	96	108.2	95.9	114	96.3	78.1	High	Not Found	High	High	Not Found	High	Not Found	Not Found	Not Found
FALSE	High	Master Protein	P50443	Sulfate transporter OS=Homo sapiens OX=9606 GN=SLC26A2 PE=1 SV=2	0	24.214	8	5	5	5	1	739	81.6	8.38	17.16	5	0	101.2	97.8	99.5	95	103.4	118.7	Not Found	High	Not Found	High	High	Not Found	High	Not Found	Not Found
FALSE	High	Master Protein	P84090	Enhancer of rudimentary homolog OS=Homo sapiens OX=9606 GN=ERH PE=1 SV=1	0	24.176	34	3	7	3	1	104	12.3	5.92	22.17	3	0	114.3	102.3	103.4	88.4	100.4	95	Not Found	Not Found	High	High	Not Found	Not Found	Not Found	Not Found	Not Found
FALSE	High	Master Protein	Q14165	Malectin OS=Homo sapiens OX=9606 GN=MLEC PE=1 SV=1	0	24.157	13	4	4	4	1	292	32.2	5.41	15.37	4	0	112.6	102.5	103.4	101.5	102.2	96.5	Not Found	High	High	Not Found	Not Found	Not Found	Not Found	Not Found	Not Found
FALSE	High	Master Protein	P51970	NADH dehydrogenase [ubiquinone] 1 alpha subcomplex subunit 8 OS=Homo sapiens OX=9606 GN=NDUFA8 PE=1 SV=3	0	24.129	17	3	5	3	1	172	20.1	7.65	16.16	3	0	101.2	107.9	108.2	100.8	96.1	92.5	Not Found	Not Found	Not Found	High	High	High	High	Not Found	Not Found
FALSE	High	Master Protein	O95182	NADH dehydrogenase [ubiquinone] 1 alpha subcomplex subunit 7 OS=Homo sapiens OX=9606 GN=NDUFA7 PE=1 SV=3	0	24.123	50	5	6	5	1	113	12.5	10.18	22.6	5	0	95.9	94.5	98.1	105	105	104.2	Not Found	Not Found	Not Found	High	High	High	High	High	Not Found
FALSE	High	Master Protein	Q92696	Geranylgeranyl transferase type-2 subunit alpha OS=Homo sapiens OX=9606 GN=RABGGTA PE=1 SV=2	0	24.076	9	5	6	5	1	567	65	5.67	18.87	5	0	89.4	100.7	94.2	104.8	97.9	101.2	High	High	Not Found	Not Found	High	Not Found	High	Not Found	Not Found
FALSE	High	Master Protein	P07741	Adenine phosphoribosyltransferase OS=Homo sapiens OX=9606 GN=APRT PE=1 SV=2	0	24.07	37	6	7	6	1	180	19.6	6.02	21.81	6	0	88.6	91.3	94.2	101.8	98.2	118.5	High	High	Not Found	High	Not Found	High	High	High	Not Found
FALSE	High	Master Protein	Q15286	Ras-related protein Rab-35 OS=Homo sapiens OX=9606 GN=RAB35 PE=1 SV=1	0	24.057	21	4	8	2	1	201	23	8.29	27.29	4	0	105.7	109.1	105.2	102.6	98.5	90.3	Not Found	Not Found	High	Not Found	Not Found	Not Found	High	High	Not Found
FALSE	High	Master Protein	Q09161	Nuclear cap-binding protein subunit 1 OS=Homo sapiens OX=9606 GN=NCBP1 PE=1 SV=1	0	24.043	11	6	7	6	1	790	91.8	6.43	21.12	6	0	97.5	96.1	97.6	95.6	103.8	108.8	High	Not Found	High	High	Not Found	Not Found	Not Found	High	Not Found
FALSE	High	Master Protein	O95218	Zinc finger Ran-binding domain-containing protein 2 OS=Homo sapiens OX=9606 GN=ZRANB2 PE=1 SV=2	0	24.042	16	5	5	5	1	330	37.4	10.01	18.8	5	0	100	108.3	104.1	100.6	90	93	Not Found	Not Found	High	High	Not Found	High	High	Not Found	Not Found
FALSE	High	Master Protein	P51570	Galactokinase OS=Homo sapiens OX=9606 GN=GALK1 PE=1 SV=1	0	24.024	14	5	5	5	1	392	42.2	6.46	16.15	5	0	91	92.4	93.3	94.2	98.2	136	Not Found	High	Not Found	Not Found	High	Not Found	Not Found	Not Found	High
FALSE	High	Master Protein	Q6ZSR9	Uncharacterized protein FLJ45252 OS=Homo sapiens OX=9606 PE=2 SV=2	0	23.978	18	4	4	4	1	355	38	5.26	14.57	4	0	95.2	107.6	100.8	106.5	95.8	94.8	Not Found	High	High	Not Found	Not Found	High	Not Found	Not Found	Not Found
FALSE	High	Master Protein	Q9GZT3	SRA stem-loop-interacting RNA-binding protein, mitochondrial OS=Homo sapiens OX=9606 GN=SLIRP PE=1 SV=1	0	23.95	50	6	6	6	1	109	12.3	10.24	17.18	6	0	125.1	119.4	123.8	97.3	99.9	76.7	Not Found	Not Found	High	High	Not Found	Not Found	High	High	Not Found
FALSE	High	Master Protein	P49720	Proteasome subunit beta type-3 OS=Homo sapiens OX=9606 GN=PSMB3 PE=1 SV=2	0	23.948	34	5	6	5	1	205	22.9	6.55	22.62	5	0	96.7	102.9	101.4	102.6	101.4	83.8	Not Found	Not Found	Not Found	Not Found	Not Found	High	High	Not Found	Not Found
FALSE	High	Master Protein	Q13616	Cullin-1 OS=Homo sapiens OX=9606 GN=CUL1 PE=1 SV=2	0	23.938	9	7	10	7	1	776	89.6	8	27.14	7	0	100.3	100.6	97.8	101.5	104.1	92.8	Not Found	High	High	High	High	High	High	Not Found	Not Found
FALSE	High	Master Protein	P37235	Hippocalcin-like protein 1 OS=Homo sapiens OX=9606 GN=HPCAL1 PE=1 SV=3	0	23.921	28	6	7	6	1	193	22.3	5.35	22.67	6	0	97.7	96.9	100.2	102.2	100.2	103	Not Found	Not Found	High	High	High	High	Not Found	Not Found	Not Found
FALSE	High	Master Protein	P43121	Cell surface glycoprotein MUC18 OS=Homo sapiens OX=9606 GN=MCAM PE=1 SV=2	0	23.916	12	7	8	7	1	646	71.6	5.76	22.17	7	0	102.3	99.4	98.7	102.1	105.3	112.3	High	Not Found	High	High	Not Found	High	Not Found	High	High
FALSE	High	Master Protein	Q9NUJ1	Palmitoyl-protein thioesterase ABHD10, mitochondrial OS=Homo sapiens OX=9606 GN=ABHD10 PE=1 SV=1	0	23.898	24	5	5	5	1	306	33.9	8.57	17.23	5	0	104	101.5	102.7	100	104.2	85.4	Not Found	Not Found	Not Found	High	High	Not Found	High	High	Not Found
FALSE	High	Master Protein	Q5JSH3	WD repeat-containing protein 44 OS=Homo sapiens OX=9606 GN=WDR44 PE=1 SV=1	0	23.759	10	6	6	6	1	913	101.3	5.45	17.76	6	0	98.9	104.9	93.5	100.6	93.6	110.6	Not Found	Not Found	High	High	Not Found	High	Not Found	Not Found	Not Found
FALSE	High	Master Protein	Q9BRR6	ADP-dependent glucokinase OS=Homo sapiens OX=9606 GN=ADPGK PE=1 SV=1	0	23.743	15	5	7	5	1	497	54.1	6.2	21.76	5	0	102.4	102.6	98.6	96.4	107.5	97.8	Not Found	Not Found	High	High	High	High	High	Not Found	Not Found
FALSE	High	Master Protein	Q9Y2G5	GDP-fucose protein O-fucosyltransferase 2 OS=Homo sapiens OX=9606 GN=POFUT2 PE=1 SV=3	0	23.736	16	8	14	8	1	429	49.9	6.6	32.56	8	0	103.1	99.2	100.6	98.5	104.3	97	High	High	High	High	High	Not Found	High	Not Found	Not Found
FALSE	High	Master Protein	Q13423	NAD(P) transhydrogenase, mitochondrial OS=Homo sapiens OX=9606 GN=NNT PE=1 SV=3	0	23.701	7	7	9	7	1	1086	113.8	8.09	22.37	7	0	116	98.9	101.5	103.8	110.9	96.4	Not Found	Not Found	High	High	Not Found	High	Not Found	High	Not Found
FALSE	High	Master Protein	P55263	Adenosine kinase OS=Homo sapiens OX=9606 GN=ADK PE=1 SV=2	0	23.698	17	4	4	4	1	362	40.5	6.7	17.78	4	0	98.1	101.8	101.6	105.7	97.2	86.4	Not Found	High	Not Found	High	High	Not Found	Not Found	High	Not Found
FALSE	High	Master Protein	P13987	CD59 glycoprotein OS=Homo sapiens OX=9606 GN=CD59 PE=1 SV=1	0	23.683	23	3	25	3	1	128	14.2	6.48	89.04	3	0	105.5	107.8	99.2	96.3	100.4	111.4	Not Found	Not Found	High	High	High	High	High	Not Found	Not Found
FALSE	High	Master Protein	Q16740	ATP-dependent Clp protease proteolytic subunit, mitochondrial OS=Homo sapiens OX=9606 GN=CLPP PE=1 SV=1	0	23.666	26	5	5	5	1	277	30.2	8.09	13.42	5	0	104.2	97.1	97.5	92.6	99.2	119	High	Not Found	Not Found	High	Not Found	Not Found	High	Not Found	Not Found
FALSE	High	Master Protein	Q9HCN8	Stromal cell-derived factor 2-like protein 1 OS=Homo sapiens OX=9606 GN=SDF2L1 PE=1 SV=2	0	23.602	20	3	7	3	1	221	23.6	7.03	23.68	3	0	103.5	101	100.9	96.7	102.7	98.1	Not Found	Not Found	High	Not Found	Not Found	High	Not Found	High	Not Found
FALSE	High	Master Protein	Q9H4A4	Aminopeptidase B OS=Homo sapiens OX=9606 GN=RNPEP PE=1 SV=2	0	23.589	13	7	8	7	1	650	72.5	5.74	21.34	7	0	95.2	101.4	92.7	100.2	96.9	107.4	Not Found	High	High	Not Found	High	High	Not Found	High	Not Found
FALSE	High	Master Protein	Q15477	Helicase SKI2W OS=Homo sapiens OX=9606 GN=SKIV2L PE=1 SV=3	0	23.584	5	6	6	6	1	1246	137.7	6.06	17.71	6	0	94.2	97.3	93.2	103.6	101.9	103	Not Found	High	Not Found	High	High	High	High	High	Not Found
FALSE	High	Master Protein	Q15642	Cdc42-interacting protein 4 OS=Homo sapiens OX=9606 GN=TRIP10 PE=1 SV=3	0	23.558	10	5	6	5	1	601	68.3	5.73	19.22	5	0	89.6	96.2	94.3	98.8	99.8	114.8	Not Found	High	High	High	High	Not Found	High	Not Found	Not Found
FALSE	High	Master Protein	O95232	Luc7-like protein 3 OS=Homo sapiens OX=9606 GN=LUC7L3 PE=1 SV=2	0	23.558	12	4	5	4	1	432	51.4	9.79	17.95	4	0	96.1	98.9	99.2	96.9	101.9	105.6	Not Found	Not Found	Not Found	High	High	High	High	Not Found	Not Found
FALSE	High	Master Protein	Q9Y4P3	Transducin beta-like protein 2 OS=Homo sapiens OX=9606 GN=TBL2 PE=1 SV=1	0	23.55	12	5	6	5	1	447	49.8	9.44	19.03	5	0	94.7	90.3	91.4	112.5	102.4	126.8	Not Found	Not Found	High	Not Found	High	High	High	Not Found	Not Found
FALSE	High	Master Protein	O14908	PDZ domain-containing protein GIPC1 OS=Homo sapiens OX=9606 GN=GIPC1 PE=1 SV=2	0	23.495	17	5	7	5	1	333	36	6.28	23.79	5	0	99.8	101.8	96.3	98.3	100.8	109.4	High	High	Not Found	High	Not Found	Not Found	Not Found	Not Found	Not Found
FALSE	High	Master Protein	Q13510	Acid ceramidase OS=Homo sapiens OX=9606 GN=ASAH1 PE=1 SV=5	0	23.462	16	7	9	7	1	395	44.6	7.62	22.04	7	0	97.7	93.6	98.8	94.7	100.6	111.8	Not Found	Not Found	High	Not Found	High	High	High	High	Not Found
FALSE	High	Master Protein	P53999	Activated RNA polymerase II transcriptional coactivator p15 OS=Homo sapiens OX=9606 GN=SUB1 PE=1 SV=3	0	23.456	38	5	9	5	1	127	14.4	9.6	27.02	5	0	95.8	95.4	98.8	104.2	100.9	101.2	High	High	Not Found	High	Not Found	High	High	Not Found	Not Found
FALSE	High	Master Protein	Q8TBC4	NEDD8-activating enzyme E1 catalytic subunit OS=Homo sapiens OX=9606 GN=UBA3 PE=1 SV=2	0	23.453	15	5	5	5	1	463	51.8	5.45	17.05	5	0	96.1	97.1	95.3	100.8	105.9	106.4	Not Found	High	Not Found	High	High	Not Found	High	Not Found	Not Found
FALSE	High	Master Protein	Q71UM5	40S ribosomal protein S27-like OS=Homo sapiens OX=9606 GN=RPS27L PE=1 SV=3	0	23.449	39	4	14	2	1	84	9.5	9.45	41.37	4	3	97.9	95.4	98.7	102.3	102.3	100	Not Found	Not Found	High	High	High	Not Found	Not Found	Not Found	Not Found
FALSE	High	Master Protein	Q8TEA8	D-aminoacyl-tRNA deacylase 1 OS=Homo sapiens OX=9606 GN=DTD1 PE=1 SV=2	0	23.441	18	3	4	3	1	209	23.4	8.24	14.23	3	0	96.6	105	98.1	103.7	94.2	87.4	Not Found	Not Found	High	Not Found	High	Not Found	Not Found	Not Found	High
FALSE	High	Master Protein	Q9HCC0	Methylcrotonoyl-CoA carboxylase beta chain, mitochondrial OS=Homo sapiens OX=9606 GN=MCCC2 PE=1 SV=1	0	23.424	8	4	5	4	1	563	61.3	7.68	17.53	4	0	103.9	93	98.2	93	107.7	119.4	Not Found	Not Found	Not Found	High	Not Found	High	High	High	Not Found
FALSE	High	Master Protein	Q9HC07	Transmembrane protein 165 OS=Homo sapiens OX=9606 GN=TMEM165 PE=1 SV=1	0	23.309	13	3	6	3	1	324	34.9	7.02	31.05	3	0	113.3	115.9	105.5	105.8	95	91.9	Not Found	High	Not Found	High	High	Not Found	Not Found	Not Found	Not Found
FALSE	High	Master Protein	P35269	General transcription factor IIF subunit 1 OS=Homo sapiens OX=9606 GN=GTF2F1 PE=1 SV=2	0	23.295	12	5	6	5	1	517	58.2	7.49	20.28	5	0	101.6	96.7	97.6	93.7	96.3	109.1	Not Found	High	High	Not Found	High	Not Found	Not Found	High	Not Found
FALSE	High	Master Protein	Q52LW3	Rho GTPase-activating protein 29 OS=Homo sapiens OX=9606 GN=ARHGAP29 PE=1 SV=2	0	23.272	6	6	7	6	1	1261	142	6.74	18.92	6	0	96.6	98.8	96.5	99.4	96.9	105.9	Not Found	Not Found	High	High	High	Not Found	High	Not Found	Not Found
FALSE	High	Master Protein	Q96N66	Lysophospholipid acyltransferase 7 OS=Homo sapiens OX=9606 GN=MBOAT7 PE=1 SV=2	0	23.255	11	4	5	4	1	472	52.7	8.97	19.47	4	0	105.9	98.4	97.8	94.9	107.6	118.7	Not Found	High	Not Found	High	High	Not Found	Not Found	Not Found	Not Found
FALSE	High	Master Protein	O14744	Protein arginine N-methyltransferase 5 OS=Homo sapiens OX=9606 GN=PRMT5 PE=1 SV=4	0	23.244	9	5	7	5	1	637	72.6	6.29	24.36	5	0	98.2	102.3	101.2	103.4	95.7	91.1	Not Found	High	Not Found	Not Found	High	High	High	High	Not Found
FALSE	High	Master Protein	O95757	Heat shock 70 kDa protein 4L OS=Homo sapiens OX=9606 GN=HSPA4L PE=1 SV=3	0	23.194	6	4	4	2	1	839	94.5	5.88	15.13	4	0	96.7	99.2	92.6	103.3	100.4	108.6	Not Found	High	Not Found	Not Found	Not Found	High	Not Found	Not Found	Not Found
FALSE	High	Master Protein	P21912	Succinate dehydrogenase [ubiquinone] iron-sulfur subunit, mitochondrial OS=Homo sapiens OX=9606 GN=SDHB PE=1 SV=3	0	23.14	20	5	5	5	1	280	31.6	8.76	16.22	5	0	98.2	93.4	99	94.6	110.7	115.6	Not Found	Not Found	High	Not Found	Not Found	High	Not Found	High	Not Found
FALSE	High	Master Protein	Q13418	Integrin-linked protein kinase OS=Homo sapiens OX=9606 GN=ILK PE=1 SV=2	0	23.105	15	8	11	8	1	452	51.4	8.07	30.23	8	0	97.9	97.6	98.4	100.4	99.3	95.7	High	High	Not Found	High	High	High	High	High	Not Found
FALSE	High	Master Protein	O43823	A-kinase anchor protein 8 OS=Homo sapiens OX=9606 GN=AKAP8 PE=1 SV=1	0	23.065	9	4	4	4	1	692	76.1	5.15	16.93	4	0	91.8	89.3	90.8	91	98.8	140.5	High	High	Not Found	Not Found	High	Not Found	Not Found	High	Not Found
FALSE	High	Master Protein	P13647	Keratin, type II cytoskeletal 5 OS=Homo sapiens OX=9606 GN=KRT5 PE=1 SV=3	0	23.031	13	8	29	3	1	590	62.3	7.74	71.86	8	0	89.7	105.8	96.4	110.2	133.7	98.1	Not Found	High	Not Found	Not Found	High	Not Found	High	Not Found	Not Found
FALSE	High	Master Protein	O00186	Syntaxin-binding protein 3 OS=Homo sapiens OX=9606 GN=STXBP3 PE=1 SV=2	0	22.948	11	6	6	6	1	592	67.7	7.8	18.69	6	0	101.5	96.7	103.8	99.8	104	100.6	High	High	Not Found	High	Not Found	High	Not Found	High	Not Found
FALSE	High	Master Protein	P62899	60S ribosomal protein L31 OS=Homo sapiens OX=9606 GN=RPL31 PE=1 SV=1	0	22.945	45	6	35	6	1	125	14.5	10.54	95.13	6	0	98.6	98	99.6	96.9	100.3	102.2	High	High	High	High	High	High	High	High	Not Found
FALSE	High	Master Protein	A2RRP1	Neuroblastoma-amplified sequence OS=Homo sapiens OX=9606 GN=NBAS PE=1 SV=2	0	22.934	3	6	7	6	1	2371	268.4	5.96	19.66	6	0	95.2	100.6	95.6	107.6	105.1	107.9	Not Found	High	High	Not Found	Not Found	High	High	High	High
FALSE	High	Master Protein	Q14696	LRP chaperone MESD OS=Homo sapiens OX=9606 GN=MESD PE=1 SV=2	0	22.918	26	6	7	6	1	234	26.1	7.78	20.76	6	0	100.5	101.1	103.1	103.2	99.6	91.1	High	Not Found	Not Found	High	High	High	Not Found	Not Found	Not Found
FALSE	High	Master Protein	Q9Y6M9	NADH dehydrogenase [ubiquinone] 1 beta subcomplex subunit 9 OS=Homo sapiens OX=9606 GN=NDUFB9 PE=1 SV=3	0	22.916	40	5	6	5	1	179	21.8	8.38	18.21	5	0	95.8	95.5	96.4	95.2	103.1	118.9	Not Found	High	High	High	Not Found	High	Not Found	Not Found	Not Found
FALSE	High	Master Protein	P07099	Epoxide hydrolase 1 OS=Homo sapiens OX=9606 GN=EPHX1 PE=1 SV=1	0	22.911	17	7	7	7	1	455	52.9	7.25	17.82	7	0	102.1	92.7	97.9	98.6	109.6	112	High	High	Not Found	High	High	High	High	High	Not Found
FALSE	High	Master Protein	P30405	Peptidyl-prolyl cis-trans isomerase F, mitochondrial OS=Homo sapiens OX=9606 GN=PPIF PE=1 SV=1	0	22.879	44	6	6	5	1	207	22	9.38	17.1	6	0	99.1	94.1	104.5	97.6	105.9	101.1	Not Found	Not Found	Not Found	Not Found	High	High	High	High	Not Found
FALSE	High	Master Protein	O43290	U4/U6.U5 tri-snRNP-associated protein 1 OS=Homo sapiens OX=9606 GN=SART1 PE=1 SV=1	0	22.83	6	5	6	4	1	800	90.2	6.13	17.87	5	0	102.8	97.2	102.4	96.9	100.5	104.8	Not Found	High	Not Found	Not Found	Not Found	High	High	Not Found	Not Found
FALSE	High	Master Protein	P36543	V-type proton ATPase subunit E 1 OS=Homo sapiens OX=9606 GN=ATP6V1E1 PE=1 SV=1	0	22.827	23	6	8	6	1	226	26.1	8	24.74	6	0	96.3	93.9	96.8	99.6	98.8	108.3	Not Found	Not Found	High	Not Found	High	Not Found	High	High	Not Found
FALSE	High	Master Protein	Q8IZ83	Aldehyde dehydrogenase family 16 member A1 OS=Homo sapiens OX=9606 GN=ALDH16A1 PE=1 SV=2	0	22.75	6	3	4	3	1	802	85.1	6.79	17.47	3	0	98.2	88.4	90.7	95.2	102.4	136.9	Not Found	Not Found	High	Not Found	High	High	Not Found	Not Found	Not Found
FALSE	High	Master Protein	P82912	28S ribosomal protein S11, mitochondrial OS=Homo sapiens OX=9606 GN=MRPS11 PE=1 SV=2	0	22.728	24	2	2	2	1	194	20.6	10.81	12.98	2	0	96.6	87.7	105.3	100.1	113.3	119	Not Found	Not Found	Not Found	Not Found	High	Not Found	Not Found	High	Not Found
FALSE	High	Master Protein	Q04760	Lactoylglutathione lyase OS=Homo sapiens OX=9606 GN=GLO1 PE=1 SV=4	0	22.688	34	5	6	5	1	184	20.8	5.31	16.89	5	0	94.1	104.1	102.2	106.7	93.3	87.2	Not Found	Not Found	Not Found	Not Found	Not Found	High	High	High	Not Found
FALSE	High	Master Protein	P08962	CD63 antigen OS=Homo sapiens OX=9606 GN=CD63 PE=1 SV=2	0	22.668	18	4	13	4	1	238	25.6	7.81	28.87	4	0	109.6	98.1	103.9	94.8	101.3	99.1	Not Found	High	High	High	High	High	High	Not Found	Not Found
FALSE	High	Master Protein	P23786	Carnitine O-palmitoyltransferase 2, mitochondrial OS=Homo sapiens OX=9606 GN=CPT2 PE=1 SV=2	0	22.652	10	4	5	4	1	658	73.7	8.18	16.69	4	0	115.8	109.2	102.2	105	102.7	77.3	Not Found	High	High	High	High	Not Found	High	Not Found	Not Found
FALSE	High	Master Protein	Q9UM22	Mammalian ependymin-related protein 1 OS=Homo sapiens OX=9606 GN=EPDR1 PE=1 SV=2	0	22.582	15	3	6	3	1	224	25.4	6.6	17.46	3	0	99.4	92.3	94.6	99.3	107.5	109.8	Not Found	Not Found	Not Found	High	High	Not Found	Not Found	Not Found	Not Found
FALSE	High	Master Protein	P21926	CD9 antigen OS=Homo sapiens OX=9606 GN=CD9 PE=1 SV=4	0	22.545	21	4	5	4	1	228	25.4	7.15	20.83	4	0	113.3	100.9	105.5	102	105.6	88.4	Not Found	Not Found	Not Found	High	Not Found	Not Found	High	Not Found	Not Found
FALSE	High	Master Protein	Q6YP21	Kynurenine--oxoglutarate transaminase 3 OS=Homo sapiens OX=9606 GN=KYAT3 PE=1 SV=1	0	22.538	13	6	6	6	1	454	51.4	8.19	19.43	6	0	103	101.6	100.6	101.6	101.2	84.4	Not Found	Not Found	High	Not Found	Not Found	Not Found	High	High	Not Found
FALSE	High	Master Protein	O75569	Interferon-inducible double-stranded RNA-dependent protein kinase activator A OS=Homo sapiens OX=9606 GN=PRKRA PE=1 SV=1	0	22.529	17	4	5	4	1	313	34.4	8.41	16.07	4	0	94.8	98.5	99.1	97.1	104.1	105.7	Not Found	Not Found	Not Found	High	High	High	Not Found	High	Not Found
FALSE	High	Master Protein	Q13144	Translation initiation factor eIF-2B subunit epsilon OS=Homo sapiens OX=9606 GN=EIF2B5 PE=1 SV=3	0	22.475	9	4	6	4	1	721	80.3	5.08	16.6	4	0	94.9	97.9	90.7	105.4	96.4	112.8	Not Found	Not Found	High	High	High	High	Not Found	Not Found	Not Found
FALSE	High	Master Protein	Q9UL25	Ras-related protein Rab-21 OS=Homo sapiens OX=9606 GN=RAB21 PE=1 SV=3	0	22.398	28	5	5	5	1	225	24.3	7.94	13.54	5	0	102	100.9	96.4	91.9	102.8	106.3	Not Found	High	Not Found	High	Not Found	High	Not Found	High	Not Found
FALSE	High	Master Protein	Q13243	Serine/arginine-rich splicing factor 5 OS=Homo sapiens OX=9606 GN=SRSF5 PE=1 SV=1	0	22.397	13	3	5	2	1	272	31.2	11.59	16.8	3	0	104.7	100.1	105.2	89.9	93.8	94.3	Not Found	High	Not Found	Not Found	High	Not Found	Not Found	Not Found	Not Found
FALSE	High	Master Protein	P43155	Carnitine O-acetyltransferase OS=Homo sapiens OX=9606 GN=CRAT PE=1 SV=5	0	22.345	5	3	7	3	1	626	70.8	8.44	18.85	3	0	107.1	99.1	101.1	95.5	106.6	95.4	Not Found	Not Found	Not Found	Not Found	High	High	High	High	Not Found
FALSE	High	Master Protein	Q86W92	Liprin-beta-1 OS=Homo sapiens OX=9606 GN=PPFIBP1 PE=1 SV=2	0	22.335	10	8	8	8	1	1011	114	5.55	16.21	8	0	98	101.2	99.6	94	96.7	101.4	High	Not Found	High	High	Not Found	High	High	Not Found	Not Found
FALSE	High	Master Protein	Q16637	Survival motor neuron protein OS=Homo sapiens OX=9606 GN=SMN1 PE=1 SV=1	0	22.332	21	5	5	5	1	294	31.8	6.55	14.24	5	0	98	103.9	97	100.8	92.9	91.7	Not Found	Not Found	High	Not Found	High	Not Found	High	High	Not Found
FALSE	High	Master Protein	P14923	Junction plakoglobin OS=Homo sapiens OX=9606 GN=JUP PE=1 SV=3	0	22.313	10	6	6	3	1	745	81.7	6.14	14.71	6	0	75.6	108.9	87.2	113.3	98.5	116.7	Not Found	Not Found	Not Found	High	High	Not Found	Not Found	High	Not Found
FALSE	High	Master Protein	O60573	Eukaryotic translation initiation factor 4E type 2 OS=Homo sapiens OX=9606 GN=EIF4E2 PE=1 SV=1	0	22.298	24	4	5	4	1	245	28.3	8.88	18.4	4	0	98.3	104.2	98.2	101.2	96.3	96.1	High	High	High	Not Found	High	Not Found	High	Not Found	Not Found
FALSE	High	Master Protein	Q9UHL4	Dipeptidyl peptidase 2 OS=Homo sapiens OX=9606 GN=DPP7 PE=1 SV=3	0	22.272	10	4	6	4	1	492	54.3	6.32	19.79	4	0	94	92.6	91.2	95.6	106.9	129.5	High	High	Not Found	Not Found	High	Not Found	High	Not Found	Not Found
FALSE	High	Master Protein	Q15631	Translin OS=Homo sapiens OX=9606 GN=TSN PE=1 SV=1	0	22.266	29	6	7	6	1	228	26.2	6.44	16.05	6	0	94.2	98.6	99	107.9	94.4	96.3	Not Found	Not Found	High	Not Found	High	Not Found	High	High	Not Found
FALSE	High	Master Protein	Q13642	Four and a half LIM domains protein 1 OS=Homo sapiens OX=9606 GN=FHL1 PE=1 SV=4	0	22.199	17	5	5	5	1	323	36.2	8.97	16.15	5	0	88.5	94.7	94.2	103.9	101	98.3	Not Found	Not Found	Not Found	High	High	Not Found	Not Found	High	Not Found
FALSE	High	Master Protein	P48509	CD151 antigen OS=Homo sapiens OX=9606 GN=CD151 PE=1 SV=3	0	22.184	21	6	13	6	1	253	28.3	7.47	38.62	6	0	107.1	101.2	104.7	108.6	103	98.9	Not Found	Not Found	Not Found	High	High	High	High	High	Not Found
FALSE	High	Master Protein	Q9UBY9	Heat shock protein beta-7 OS=Homo sapiens OX=9606 GN=HSPB7 PE=1 SV=1	0	22.181	19	2	4	2	1	170	18.6	6.52	15.5	2	0	89.1	91.4	94.2	103.2	107.6	110.2	Not Found	Not Found	Not Found	Not Found	Not Found	High	High	High	Not Found
FALSE	High	Master Protein	Q9NR28	Diablo homolog, mitochondrial OS=Homo sapiens OX=9606 GN=DIABLO PE=1 SV=1	0	22.177	16	4	6	4	1	239	27.1	5.9	17.66	4	0	108.1	92.9	99.4	92	107.1	116.5	High	High	High	High	Not Found	Not Found	High	Not Found	Not Found
FALSE	High	Master Protein	O15498	Synaptobrevin homolog YKT6 OS=Homo sapiens OX=9606 GN=YKT6 PE=1 SV=1	0	22.175	29	6	6	6	1	198	22.4	6.92	18.05	6	0	100	104.6	95.7	109.1	99.5	89.3	Not Found	Not Found	High	Not Found	High	Not Found	High	Not Found	Not Found
FALSE	High	Master Protein	Q9GZU8	PSME3-interacting protein OS=Homo sapiens OX=9606 GN=PSME3IP1 PE=1 SV=1	0	22.159	19	4	6	4	1	254	28.9	5.45	18.26	4	0	106.7	105.8	100.1	96.5	98.9	99.8	Not Found	High	High	High	Not Found	Not Found	Not Found	Not Found	Not Found
FALSE	High	Master Protein	P10321	HLA class I histocompatibility antigen, C alpha chain OS=Homo sapiens OX=9606 GN=HLA-C PE=1 SV=3	0	22.131	14	3	3	1	1	366	40.6	6.04	13.61	3	0	89.2	93.9	87	93.8	108.8	129.2	Not Found	Not Found	Not Found	Not Found	High	Not Found	Not Found	Not Found	Not Found
FALSE	High	Master Protein	Q15555	Microtubule-associated protein RP/EB family member 2 OS=Homo sapiens OX=9606 GN=MAPRE2 PE=1 SV=1	0	22.119	24	6	7	5	1	327	37	5.57	15.98	6	1	94.4	97.7	95.6	92.7	102.2	118.2	High	High	Not Found	Not Found	High	Not Found	High	High	Not Found
FALSE	High	Master Protein	O60613	Selenoprotein F OS=Homo sapiens OX=9606 GN=SELENOF PE=1 SV=4	0	22.093	29	4	5	4	1	165	18.1	5.03	16.33	4	0	99.4	93.7	99.3	98.2	104	112.7	Not Found	Not Found	High	High	High	Not Found	Not Found	Not Found	Not Found
FALSE	High	Master Protein	O60739	Eukaryotic translation initiation factor 1b OS=Homo sapiens OX=9606 GN=EIF1B PE=1 SV=2	0	22.076	48	3	3	3	1	113	12.8	7.37	14	3	0	97	101.8	96.5	92.4	93.4	100.9	Not Found	Not Found	High	High	Not Found	Not Found	Not Found	Not Found	Not Found
FALSE	High	Master Protein	Q14318	Peptidyl-prolyl cis-trans isomerase FKBP8 OS=Homo sapiens OX=9606 GN=FKBP8 PE=1 SV=2	0	22.051	11	4	5	4	1	412	44.5	4.84	19.06	4	0	98.4	98.6	96.7	100.6	105.2	111.3	Not Found	High	High	Not Found	High	Not Found	High	Not Found	Not Found
FALSE	High	Master Protein	P33121	Long-chain-fatty-acid--CoA ligase 1 OS=Homo sapiens OX=9606 GN=ACSL1 PE=1 SV=1	0	22.024	6	4	5	4	1	698	77.9	7.15	15.79	4	0	95.4	97.8	96.3	96.9	102.2	115.6	Not Found	Not Found	Not Found	High	Not Found	High	Not Found	High	Not Found
FALSE	High	Master Protein	P16949	Stathmin OS=Homo sapiens OX=9606 GN=STMN1 PE=1 SV=3	0	22.009	23	5	8	5	1	149	17.3	5.97	20.77	5	0	96	100.8	95.4	99.2	89.4	119.6	Not Found	Not Found	Not Found	High	Not Found	Not Found	Not Found	Not Found	High
FALSE	High	Master Protein	Q8NFJ5	Retinoic acid-induced protein 3 OS=Homo sapiens OX=9606 GN=GPRC5A PE=1 SV=2	0	21.885	13	5	9	5	1	357	40.2	8.15	26.15	5	0	100.2	94.5	97	100.2	105.8	116.1	Not Found	High	Not Found	Not Found	High	High	High	High	Not Found
FALSE	High	Master Protein	Q9BZE1	39S ribosomal protein L37, mitochondrial OS=Homo sapiens OX=9606 GN=MRPL37 PE=1 SV=2	0	21.859	16	5	5	5	1	423	48.1	8.59	16.39	5	0	103.5	95.8	97.3	100.3	103.2	104.6	Not Found	Not Found	Not Found	High	Not Found	High	High	Not Found	Not Found
FALSE	High	Master Protein	P26022	Pentraxin-related protein PTX3 OS=Homo sapiens OX=9606 GN=PTX3 PE=1 SV=3	0	21.84	17	5	6	5	1	381	41.9	5.01	14.59	5	0	106.3	105.4	93.2	83.7	97.3	156.4	High	Not Found	Not Found	Not Found	High	High	High	Not Found	Not Found
FALSE	High	Master Protein	Q15437	Protein transport protein Sec23B OS=Homo sapiens OX=9606 GN=SEC23B PE=1 SV=2	0	21.814	7	5	5	2	1	767	86.4	6.89	15.52	5	0	92.8	99.5	99.5	99.5	99.2	99.3	Not Found	Not Found	Not Found	Not Found	Not Found	High	Not Found	High	Not Found
FALSE	High	Master Protein	P09234	U1 small nuclear ribonucleoprotein C OS=Homo sapiens OX=9606 GN=SNRPC PE=1 SV=1	0	21.793	25	3	6	3	1	159	17.4	9.67	20.56	3	0	106.7	103.6	107.3	102	100.8	79.3	Not Found	Not Found	Not Found	High	High	High	High	Not Found	Not Found
FALSE	High	Master Protein	P63172	Dynein light chain Tctex-type 1 OS=Homo sapiens OX=9606 GN=DYNLT1 PE=1 SV=1	0	21.781	51	3	3	3	1	113	12.4	5.08	13.49	3	0	98.2	106.6	89.2	96.6	106.4	104.1	Not Found	Not Found	Not Found	High	High	Not Found	Not Found	High	Not Found
FALSE	High	Master Protein	P28799	Progranulin OS=Homo sapiens OX=9606 GN=GRN PE=1 SV=2	0	21.779	12	7	9	7	1	593	63.5	6.83	23.5	7	0	103.6	94.5	99.5	92.3	97.9	110.6	Not Found	High	Not Found	High	High	High	Not Found	High	Not Found
FALSE	High	Master Protein	P50416	Carnitine O-palmitoyltransferase 1, liver isoform OS=Homo sapiens OX=9606 GN=CPT1A PE=1 SV=2	0	21.777	8	5	6	5	1	773	88.3	8.65	16.35	5	0	106.1	91.6	98.3	91.5	104.1	130.8	Not Found	High	High	High	Not Found	Not Found	Not Found	Not Found	Not Found
FALSE	High	Master Protein	O43181	NADH dehydrogenase [ubiquinone] iron-sulfur protein 4, mitochondrial OS=Homo sapiens OX=9606 GN=NDUFS4 PE=1 SV=1	0	21.773	17	3	5	3	1	175	20.1	10.3	17.01	3	0	104.5	113.5	103.7	96.1	100.8	83.6	Not Found	Not Found	High	High	High	Not Found	High	Not Found	Not Found
FALSE	High	Master Protein	P11310	Medium-chain specific acyl-CoA dehydrogenase, mitochondrial OS=Homo sapiens OX=9606 GN=ACADM PE=1 SV=1	0	21.756	12	5	5	5	1	421	46.6	8.37	13.76	5	0	105.2	110.4	100.6	103.8	101.5	77.7	Not Found	Not Found	High	Not Found	High	High	Not Found	High	Not Found
FALSE	High	Master Protein	Q96FJ2	Dynein light chain 2, cytoplasmic OS=Homo sapiens OX=9606 GN=DYNLL2 PE=1 SV=1	0	21.752	37	2	5	1	1	89	10.3	7.37	19.6	2	0	101.8	113.5	93.6	107.2	100	77.3	Not Found	Not Found	High	Not Found	Not Found	Not Found	Not Found	Not Found	Not Found
FALSE	High	Master Protein	P30085	UMP-CMP kinase OS=Homo sapiens OX=9606 GN=CMPK1 PE=1 SV=3	0	21.739	25	4	5	4	1	196	22.2	5.57	18.1	4	0	89.1	97.3	95.1	101.2	101.3	99.9	Not Found	Not Found	Not Found	Not Found	High	Not Found	High	High	Not Found
FALSE	High	Master Protein	Q15005	Signal peptidase complex subunit 2 OS=Homo sapiens OX=9606 GN=SPCS2 PE=1 SV=3	0	21.732	22	4	8	4	1	226	25	8.47	32.83	4	0	107.3	101.2	102.9	109.6	103	87.1	Not Found	High	High	High	High	High	High	Not Found	Not Found
FALSE	High	Master Protein	O00505	Importin subunit alpha-4 OS=Homo sapiens OX=9606 GN=KPNA3 PE=1 SV=2	0	21.718	6	3	4	1	1	521	57.8	4.94	14.76	3	0	107.1	104.6	104.6	105	102.6	82.7	Not Found	Not Found	Not Found	Not Found	Not Found	Not Found	Not Found	High	Not Found
FALSE	High	Master Protein	Q9NVS9	Pyridoxine-5'-phosphate oxidase OS=Homo sapiens OX=9606 GN=PNPO PE=1 SV=1	0	21.705	21	4	8	4	1	261	30	7.06	31.73	4	0	97.4	95.3	98.7	99.1	100.4	110.2	High	High	Not Found	Not Found	High	High	High	High	Not Found
FALSE	High	Master Protein	O75165	DnaJ homolog subfamily C member 13 OS=Homo sapiens OX=9606 GN=DNAJC13 PE=1 SV=5	0	21.683	3	6	6	6	1	2243	254.3	6.74	14.37	6	0	91.9	100.8	93.2	96.8	103.1	115.4	Not Found	Not Found	Not Found	High	High	High	High	High	Not Found
FALSE	High	Master Protein	P19823	Inter-alpha-trypsin inhibitor heavy chain H2 OS=Homo sapiens OX=9606 GN=ITIH2 PE=1 SV=2	0	21.618	7	7	8	7	1	946	106.4	6.86	24.87	7	0	73.3	98.9	87.8	115.5	90	110.9	Not Found	Not Found	Not Found	High	High	High	High	Not Found	Not Found
FALSE	High	Master Protein	Q9P2B4	CTTNBP2 N-terminal-like protein OS=Homo sapiens OX=9606 GN=CTTNBP2NL PE=1 SV=2	0	21.592	8	5	6	5	1	639	70.1	8.06	19.26	5	0	100	93.9	93.5	91	102.2	125.5	High	Not Found	High	High	Not Found	Not Found	Not Found	High	Not Found
FALSE	High	Master Protein	Q14232	Translation initiation factor eIF-2B subunit alpha OS=Homo sapiens OX=9606 GN=EIF2B1 PE=1 SV=1	0	21.577	15	4	4	4	1	305	33.7	7.33	12.89	4	0	98	101.9	93.6	99	106.6	97.7	Not Found	Not Found	High	Not Found	High	Not Found	High	High	Not Found
FALSE	High	Master Protein	Q9NP74	Palmdelphin OS=Homo sapiens OX=9606 GN=PALMD PE=1 SV=1	0	21.572	12	5	6	5	1	551	62.7	5.44	18.81	5	0	93	101.4	95.6	107.6	96.5	101.4	Not Found	Not Found	High	High	High	Not Found	Not Found	Not Found	Not Found
FALSE	High	Master Protein	P49207	60S ribosomal protein L34 OS=Homo sapiens OX=9606 GN=RPL34 PE=1 SV=3	0	21.566	42	6	24	6	1	117	13.3	11.47	67.39	6	0	102.9	97	106.4	92.9	97.2	101.9	Not Found	Not Found	Not Found	High	High	High	High	High	Not Found
FALSE	High	Master Protein	P30837	Aldehyde dehydrogenase X, mitochondrial OS=Homo sapiens OX=9606 GN=ALDH1B1 PE=1 SV=3	0	21.519	12	5	9	4	1	517	57.2	6.8	25.9	5	0	102	99.6	94.5	99.7	108.5	97	Not Found	Not Found	Not Found	Not Found	Not Found	Not Found	High	High	Not Found
FALSE	High	Master Protein	P07585	Decorin OS=Homo sapiens OX=9606 GN=DCN PE=1 SV=1	0	21.503	12	4	4	4	1	359	39.7	8.54	14.34	4	0	97.1	96.3	95.2	100.7	108	109	Not Found	Not Found	Not Found	Not Found	High	High	Not Found	High	Not Found
FALSE	High	Master Protein	Q9GZZ1	N-alpha-acetyltransferase 50 OS=Homo sapiens OX=9606 GN=NAA50 PE=1 SV=1	0	21.485	34	5	6	5	1	169	19.4	8.81	17.38	5	0	97.9	101.9	98.6	96.5	94.7	91.1	Not Found	Not Found	Not Found	High	High	Not Found	High	Not Found	Not Found
FALSE	High	Master Protein	Q9NP72	Ras-related protein Rab-18 OS=Homo sapiens OX=9606 GN=RAB18 PE=1 SV=1	0	21.46	19	3	3	3	1	206	23	5.24	11.29	3	0	104.8	93.8	102.2	99.5	105.1	109.9	Not Found	Not Found	Not Found	High	High	Not Found	High	Not Found	Not Found
FALSE	High	Master Protein	Q969T9	WW domain-binding protein 2 OS=Homo sapiens OX=9606 GN=WBP2 PE=1 SV=1	0	21.458	13	3	4	3	1	261	28.1	5.91	13.9	3	0	94.3	99.4	95.3	102.9	98.2	101.4	Not Found	Not Found	Not Found	High	Not Found	Not Found	High	Not Found	Not Found
FALSE	High	Master Protein	P61619	Protein transport protein Sec61 subunit alpha isoform 1 OS=Homo sapiens OX=9606 GN=SEC61A1 PE=1 SV=2	0	21.342	14	7	12	7	1	476	52.2	8.06	35.26	7	0	108	95.6	103.9	99	104.8	108.5	Not Found	Not Found	High	High	High	High	High	High	Not Found
FALSE	High	Master Protein	P25685	DnaJ homolog subfamily B member 1 OS=Homo sapiens OX=9606 GN=DNAJB1 PE=1 SV=4	0	21.305	15	4	6	3	1	340	38	8.63	18.48	4	0	85.9	94.1	90.4	92.3	97.8	146.9	Not Found	High	High	Not Found	High	Not Found	Not Found	Not Found	Not Found
FALSE	High	Master Protein	O14745	Na(+)/H(+) exchange regulatory cofactor NHE-RF1 OS=Homo sapiens OX=9606 GN=SLC9A3R1 PE=1 SV=4	0	21.255	23	6	6	6	1	358	38.8	5.77	17.94	6	0	98.1	109.4	91.7	108.4	96	99.7	High	High	Not Found	High	Not Found	Not Found	High	High	Not Found
FALSE	High	Master Protein	Q96JJ7	Protein disulfide-isomerase TMX3 OS=Homo sapiens OX=9606 GN=TMX3 PE=1 SV=2	0	21.238	14	6	7	6	1	454	51.8	4.91	20.68	6	0	110.1	97.4	101.7	99.4	106.4	97	Not Found	Not Found	High	Not Found	High	High	High	High	Not Found
FALSE	High	Master Protein	Q9Y3E5	Peptidyl-tRNA hydrolase 2, mitochondrial OS=Homo sapiens OX=9606 GN=PTRH2 PE=1 SV=1	0	21.225	31	3	5	3	1	179	19.2	8.73	26.3	3	0	101.3	106.1	98	103.1	100.3	84.7	Not Found	High	High	Not Found	Not Found	High	Not Found	High	Not Found
FALSE	High	Master Protein	O15042	U2 snRNP-associated SURP motif-containing protein OS=Homo sapiens OX=9606 GN=U2SURP PE=1 SV=2	0	21.2	4	4	7	4	1	1029	118.2	8.47	20.58	4	0	102	103.1	102.8	96.3	99.4	96.5	Not Found	Not Found	Not Found	Not Found	High	High	High	High	Not Found
FALSE	High	Master Protein	P48163	NADP-dependent malic enzyme OS=Homo sapiens OX=9606 GN=ME1 PE=1 SV=1	0	21.155	12	6	7	6	1	572	64.1	6.13	22.68	6	0	88.7	95	94.6	107.3	106.3	111.4	Not Found	Not Found	High	High	High	High	High	Not Found	Not Found
FALSE	High	Master Protein	Q14699	Raftlin OS=Homo sapiens OX=9606 GN=RFTN1 PE=1 SV=4	0	21.112	9	3	3	3	1	578	63.1	5.67	13.43	3	0	108.7	102.2	103.9	96.9	103.3	94.5	Not Found	Not Found	High	Not Found	High	Not Found	Not Found	Not Found	Not Found
FALSE	High	Master Protein	Q9Y2A7	Nck-associated protein 1 OS=Homo sapiens OX=9606 GN=NCKAP1 PE=1 SV=1	0	21.102	6	7	8	7	1	1128	128.7	6.62	20.26	7	0	94.9	100.1	96.1	97.8	95	110.6	Not Found	High	High	Not Found	Not Found	High	High	Not Found	Not Found
FALSE	High	Master Protein	P53041	Serine/threonine-protein phosphatase 5 OS=Homo sapiens OX=9606 GN=PPP5C PE=1 SV=1	0	21.08	11	5	8	5	1	499	56.8	6.28	21.02	5	0	98	105.8	99.5	105	95	87.8	Not Found	High	High	Not Found	High	High	Not Found	Not Found	Not Found
FALSE	High	Master Protein	P46977	Dolichyl-diphosphooligosaccharide--protein glycosyltransferase subunit STT3A OS=Homo sapiens OX=9606 GN=STT3A PE=1 SV=2	0	21.07	8	6	8	6	1	705	80.5	8.07	22.93	6	0	116.1	94.2	106.2	97.6	113.2	106.2	Not Found	High	High	Not Found	High	High	Not Found	High	Not Found
FALSE	High	Master Protein	O75368	SH3 domain-binding glutamic acid-rich-like protein OS=Homo sapiens OX=9606 GN=SH3BGRL PE=1 SV=1	0	21.066	29	4	7	4	1	114	12.8	5.25	22.42	4	0	88.2	92.5	91.1	103.4	97.3	119.3	Not Found	Not Found	High	Not Found	Not Found	Not Found	High	High	High
FALSE	High	Master Protein	Q9HC38	Glyoxalase domain-containing protein 4 OS=Homo sapiens OX=9606 GN=GLOD4 PE=1 SV=1	0	21.057	18	6	8	6	1	313	34.8	5.6	24.76	6	0	88.8	92.4	94.9	98	97.6	117.2	Not Found	Not Found	Not Found	High	High	High	Not Found	High	Not Found
FALSE	High	Master Protein	P04114	Apolipoprotein B-100 OS=Homo sapiens OX=9606 GN=APOB PE=1 SV=2	0	20.977	1	6	6	6	1	4563	515.3	7.05	17.49	6	0	108.1	103.8	101.9	95.1	102.9	96.9	Not Found	High	High	High	High	Not Found	High	High	Not Found
FALSE	High	Master Protein	P15151	Poliovirus receptor OS=Homo sapiens OX=9606 GN=PVR PE=1 SV=2	0	20.974	12	4	7	4	1	417	45.3	6.52	25.87	4	0	102	98.9	102.2	103.2	107.3	101.8	Not Found	Not Found	Not Found	Not Found	High	Not Found	High	High	High
FALSE	High	Master Protein	P28161	Glutathione S-transferase Mu 2 OS=Homo sapiens OX=9606 GN=GSTM2 PE=1 SV=2	0	20.944	28	6	8	5	1	218	25.7	6.37	23.17	6	0	92.7	95.6	92.7	104.2	100.4	101.3	Not Found	High	Not Found	High	Not Found	High	Not Found	High	Not Found
FALSE	High	Master Protein	Q96CS3	FAS-associated factor 2 OS=Homo sapiens OX=9606 GN=FAF2 PE=1 SV=2	0	20.844	11	3	3	3	1	445	52.6	5.62	12.66	3	0	103.4	96.7	96.9	95	102.7	112	Not Found	Not Found	High	Not Found	Not Found	High	Not Found	Not Found	Not Found
FALSE	High	Master Protein	P54725	UV excision repair protein RAD23 homolog A OS=Homo sapiens OX=9606 GN=RAD23A PE=1 SV=1	0	20.795	14	4	14	2	1	363	39.6	4.58	40.21	4	0	72.5	49.5	70.8	54.4	97.7	308.9	Not Found	High	High	High	Not Found	Not Found	Not Found	Not Found	Not Found
FALSE	High	Master Protein	Q9Y3C6	Peptidyl-prolyl cis-trans isomerase-like 1 OS=Homo sapiens OX=9606 GN=PPIL1 PE=1 SV=1	0	20.77	30	4	5	4	1	166	18.2	7.99	16.83	4	0	96.7	103.9	98.9	103.3	97.2	86.7	Not Found	Not Found	High	High	High	High	Not Found	Not Found	Not Found
FALSE	High	Master Protein	P09417	Dihydropteridine reductase OS=Homo sapiens OX=9606 GN=QDPR PE=1 SV=2	0	20.739	26	5	5	5	1	244	25.8	7.37	16.54	5	0	96.1	99.8	98	101.4	102.7	93.6	Not Found	Not Found	Not Found	High	Not Found	High	High	High	Not Found
FALSE	High	Master Protein	Q9Y6C9	Mitochondrial carrier homolog 2 OS=Homo sapiens OX=9606 GN=MTCH2 PE=1 SV=1	0	20.655	17	4	4	4	1	303	33.3	7.97	14.6	4	0	106.6	101.6	103.5	98.5	100.9	95.3	Not Found	Not Found	Not Found	High	High	Not Found	Not Found	High	Not Found
FALSE	High	Master Protein	Q8IUD2	ELKS/Rab6-interacting/CAST family member 1 OS=Homo sapiens OX=9606 GN=ERC1 PE=1 SV=1	0	20.65	4	4	4	4	1	1116	128	5.97	13.39	4	0	96.7	97.4	101.5	92.8	100.9	109.1	Not Found	Not Found	High	High	High	Not Found	Not Found	High	Not Found
FALSE	High	Master Protein	O15269	Serine palmitoyltransferase 1 OS=Homo sapiens OX=9606 GN=SPTLC1 PE=1 SV=1	0	20.623	10	4	5	4	1	473	52.7	6.01	15.84	4	0	102.9	97.3	97.1	99.1	102.6	108.7	Not Found	High	Not Found	High	Not Found	High	High	High	Not Found
FALSE	High	Master Protein	P63173	60S ribosomal protein L38 OS=Homo sapiens OX=9606 GN=RPL38 PE=1 SV=2	0	20.599	41	4	8	4	1	70	8.2	10.1	26.25	4	0	103.2	101.5	104.2	98.1	97.9	85.5	Not Found	Not Found	Not Found	Not Found	Not Found	High	High	Not Found	Not Found
FALSE	High	Master Protein	P55769	NHP2-like protein 1 OS=Homo sapiens OX=9606 GN=SNU13 PE=1 SV=3	0	20.583	25	4	5	4	1	128	14.2	8.46	18.09	4	0	95.2	91.8	98.9	97.5	105.2	108	Not Found	Not Found	Not Found	Not Found	High	High	High	High	Not Found
FALSE	High	Master Protein	P42166	Lamina-associated polypeptide 2, isoform alpha OS=Homo sapiens OX=9606 GN=TMPO PE=1 SV=2	0	20.575	11	4	5	4	1	694	75.4	7.66	19.54	4	0	101.1	97.7	98.8	94.1	97.7	119.7	Not Found	High	High	High	High	High	Not Found	Not Found	Not Found
FALSE	High	Master Protein	P46087	Probable 28S rRNA (cytosine(4447)-C(5))-methyltransferase OS=Homo sapiens OX=9606 GN=NOP2 PE=1 SV=2	0	20.548	7	4	4	4	1	812	89.2	9.23	16	4	0	96	98.1	91.9	94.9	99.5	128	Not Found	Not Found	High	High	Not Found	High	Not Found	Not Found	Not Found
FALSE	High	Master Protein	Q92544	Transmembrane 9 superfamily member 4 OS=Homo sapiens OX=9606 GN=TM9SF4 PE=1 SV=2	0	20.545	7	4	5	4	1	642	74.5	6.54	15.6	4	0	104.6	101.7	101.6	94.7	104	112.7	Not Found	Not Found	Not Found	High	Not Found	High	High	High	Not Found
FALSE	High	Master Protein	P10606	Cytochrome c oxidase subunit 5B, mitochondrial OS=Homo sapiens OX=9606 GN=COX5B PE=1 SV=2	0	20.493	30	5	6	5	1	129	13.7	8.81	18.47	5	0	119.2	107.1	112.9	92.7	101.6	89.8	Not Found	Not Found	Not Found	High	High	High	Not Found	High	Not Found
FALSE	High	Master Protein	P50579	Methionine aminopeptidase 2 OS=Homo sapiens OX=9606 GN=METAP2 PE=1 SV=1	0	20.459	14	5	5	5	1	478	52.9	5.82	18.85	5	0	91.5	96.6	94.1	99.6	100.6	122.7	Not Found	High	High	High	Not Found	High	Not Found	Not Found	Not Found
FALSE	High	Master Protein	Q13617	Cullin-2 OS=Homo sapiens OX=9606 GN=CUL2 PE=1 SV=2	0	20.436	8	7	10	7	1	745	86.9	6.92	25.02	7	0	97.1	95.2	95.1	98.9	99.4	113.3	Not Found	High	Not Found	Not Found	High	High	High	High	Not Found
FALSE	High	Master Protein	P24666	Low molecular weight phosphotyrosine protein phosphatase OS=Homo sapiens OX=9606 GN=ACP1 PE=1 SV=3	0	20.435	45	4	5	4	1	158	18	6.74	13.19	4	0	87.8	95.6	97.9	94.3	96.8	127	Not Found	Not Found	High	High	Not Found	High	Not Found	Not Found	Not Found
FALSE	High	Master Protein	Q9UKK9	ADP-sugar pyrophosphatase OS=Homo sapiens OX=9606 GN=NUDT5 PE=1 SV=1	0	20.43	19	4	5	4	1	219	24.3	4.94	16.01	4	0	93.1	106.9	100.2	104.2	94.9	89.7	Not Found	High	Not Found	High	High	Not Found	Not Found	High	Not Found
FALSE	High	Master Protein	Q8WU90	Zinc finger CCCH domain-containing protein 15 OS=Homo sapiens OX=9606 GN=ZC3H15 PE=1 SV=1	0	20.418	11	4	4	4	1	426	48.6	5.31	12.84	4	0	98.3	103.8	106.1	104.2	93.1	87.1	Not Found	High	High	Not Found	Not Found	High	High	Not Found	Not Found
FALSE	High	Master Protein	Q92878	DNA repair protein RAD50 OS=Homo sapiens OX=9606 GN=RAD50 PE=1 SV=1	0	20.394	5	7	7	7	1	1312	153.8	6.89	18.61	7	0	100.1	96.6	99.9	99	98.9	107.9	Not Found	Not Found	High	High	Not Found	High	Not Found	Not Found	Not Found
FALSE	High	Master Protein	O94851	[F-actin]-monooxygenase MICAL2 OS=Homo sapiens OX=9606 GN=MICAL2 PE=1 SV=1	0	20.358	6	5	5	5	1	1124	126.6	8.65	15.87	5	0	99.7	100.4	99.8	102.4	105	100.9	Not Found	High	Not Found	High	Not Found	High	High	Not Found	Not Found
FALSE	High	Master Protein	P23743	Diacylglycerol kinase alpha OS=Homo sapiens OX=9606 GN=DGKA PE=1 SV=3	0	20.254	8	5	5	5	1	735	82.6	6.73	16.8	5	0	98.5	98.2	102.4	99.1	98.9	93.8	Not Found	Not Found	Not Found	Not Found	High	High	Not Found	High	Not Found
FALSE	High	Master Protein	P30520	Adenylosuccinate synthetase isozyme 2 OS=Homo sapiens OX=9606 GN=ADSS2 PE=1 SV=3	0	20.241	13	6	7	6	1	456	50.1	6.55	19.02	6	0	90.5	94.3	93.2	96	95.9	112.2	Not Found	Not Found	Not Found	High	High	High	High	Not Found	Not Found
FALSE	High	Master Protein	Q9H0A0	RNA cytidine acetyltransferase OS=Homo sapiens OX=9606 GN=NAT10 PE=1 SV=2	0	20.224	5	4	5	4	1	1025	115.7	8.27	18.88	4	0	113.1	108.3	104.6	92.5	92.3	84	Not Found	High	High	Not Found	High	High	Not Found	High	Not Found
FALSE	High	Master Protein	Q68E01	Integrator complex subunit 3 OS=Homo sapiens OX=9606 GN=INTS3 PE=1 SV=1	0	20.203	5	3	3	3	1	1043	118	5.8	12	3	0	97.6	101.2	103.9	98	101.5	100.7	Not Found	Not Found	Not Found	High	High	Not Found	Not Found	Not Found	Not Found
FALSE	High	Master Protein	O60869	Endothelial differentiation-related factor 1 OS=Homo sapiens OX=9606 GN=EDF1 PE=1 SV=1	0	20.157	39	7	13	7	1	148	16.4	9.95	35.16	7	0	99	97.6	98.3	99.5	98.7	97	Not Found	Not Found	Not Found	High	High	High	High	High	Not Found
FALSE	High	Master Protein	Q13630	GDP-L-fucose synthase OS=Homo sapiens OX=9606 GN=GFUS PE=1 SV=1	0	20.155	16	4	4	4	1	321	35.9	6.6	12.88	4	0	88.8	103	92.7	100.9	93.5	114.8	High	Not Found	Not Found	High	Not Found	Not Found	High	High	Not Found
FALSE	High	Master Protein	Q9Y2W2	WW domain-binding protein 11 OS=Homo sapiens OX=9606 GN=WBP11 PE=1 SV=1	0	20.084	7	5	6	5	1	641	70	8.38	15.82	5	0	99.3	98.7	102.8	100.7	98.4	93.2	Not Found	Not Found	High	Not Found	High	High	Not Found	Not Found	Not Found
FALSE	High	Master Protein	Q86TU7	Actin-histidine N-methyltransferase OS=Homo sapiens OX=9606 GN=SETD3 PE=1 SV=1	0	20.076	8	4	4	4	1	594	67.2	5.96	14.47	4	0	96.5	104.1	102	101.6	98.1	91.2	Not Found	High	High	Not Found	High	Not Found	Not Found	Not Found	Not Found
FALSE	High	Master Protein	Q8TD19	Serine/threonine-protein kinase Nek9 OS=Homo sapiens OX=9606 GN=NEK9 PE=1 SV=2	0	20.04	5	4	4	4	1	979	107.1	5.74	14.49	4	0	91.9	106.5	97	105.7	91.4	106.9	Not Found	High	Not Found	Not Found	Not Found	High	Not Found	High	Not Found
FALSE	High	Master Protein	Q9NP61	ADP-ribosylation factor GTPase-activating protein 3 OS=Homo sapiens OX=9606 GN=ARFGAP3 PE=1 SV=1	0	20.018	11	6	7	6	1	516	56.9	7.36	18.57	6	0	84.9	92.6	88.2	102.8	93.9	130.6	High	High	High	Not Found	High	High	Not Found	High	Not Found
FALSE	High	Master Protein	P19022	Cadherin-2 OS=Homo sapiens OX=9606 GN=CDH2 PE=1 SV=4	0	19.997	6	4	4	4	1	906	99.7	4.81	12.46	4	0	110.5	98	104.4	93.7	105.9	108.7	Not Found	High	High	Not Found	Not Found	Not Found	High	Not Found	Not Found
FALSE	High	Master Protein	Q00169	Phosphatidylinositol transfer protein alpha isoform OS=Homo sapiens OX=9606 GN=PITPNA PE=1 SV=2	0	19.985	21	6	6	5	1	270	31.8	6.55	19.95	6	0	95.1	98.4	97.3	101.8	95.9	92.4	Not Found	High	Not Found	Not Found	High	High	High	Not Found	Not Found
FALSE	High	Master Protein	O76061	Stanniocalcin-2 OS=Homo sapiens OX=9606 GN=STC2 PE=1 SV=1	0	19.967	13	2	2	2	1	302	33.2	7.3	8.94	2	0	111.9	103.4	101.9	95.9	110.1	104.5	Not Found	High	High	Not Found	Not Found	Not Found	Not Found	Not Found	Not Found
FALSE	High	Master Protein	O76054	SEC14-like protein 2 OS=Homo sapiens OX=9606 GN=SEC14L2 PE=1 SV=1	0	19.967	14	4	4	4	1	403	46.1	7.84	12.99	4	0	90.5	93.4	96.7	94.4	98.3	110.6	Not Found	Not Found	Not Found	High	High	Not Found	High	Not Found	Not Found
FALSE	High	Master Protein	Q14C86	GTPase-activating protein and VPS9 domain-containing protein 1 OS=Homo sapiens OX=9606 GN=GAPVD1 PE=1 SV=2	0	19.967	4	3	4	3	1	1478	164.9	5.22	15.56	3	0	93.3	97.6	99.2	95.6	99.8	120.9	Not Found	High	High	Not Found	High	Not Found	High	Not Found	Not Found
FALSE	High	Master Protein	Q7Z739	YTH domain-containing family protein 3 OS=Homo sapiens OX=9606 GN=YTHDF3 PE=1 SV=1	0	19.956	11	6	6	6	1	585	63.8	9.04	18.01	6	0	100	100.4	98.4	101.8	93.5	93.8	Not Found	High	Not Found	Not Found	High	High	Not Found	High	Not Found
FALSE	High	Master Protein	Q16401	26S proteasome non-ATPase regulatory subunit 5 OS=Homo sapiens OX=9606 GN=PSMD5 PE=1 SV=3	0	19.953	10	4	4	4	1	504	56.2	5.48	13.9	4	0	98.4	96.6	89.5	94.5	103.5	114.7	Not Found	High	High	Not Found	High	Not Found	Not Found	High	Not Found
FALSE	High	Master Protein	O43264	Centromere/kinetochore protein zw10 homolog OS=Homo sapiens OX=9606 GN=ZW10 PE=1 SV=3	0	19.941	6	4	4	4	1	779	88.8	6.27	13.97	4	0	96.5	102.6	99.8	95.3	97.9	110.1	Not Found	High	Not Found	High	High	Not Found	Not Found	Not Found	Not Found
FALSE	High	Master Protein	Q96EL3	39S ribosomal protein L53, mitochondrial OS=Homo sapiens OX=9606 GN=MRPL53 PE=1 SV=1	0	19.884	34	3	3	3	1	112	12.1	8.76	12.05	3	0	106	103.1	104	95.3	96.4	94.8	Not Found	Not Found	High	High	Not Found	High	Not Found	Not Found	Not Found
FALSE	High	Master Protein	Q15434	RNA-binding motif, single-stranded-interacting protein 2 OS=Homo sapiens OX=9606 GN=RBMS2 PE=1 SV=1	0	19.862	6	2	4	1	1	407	43.9	9.07	13.08	2	0	101.9	96.2	103.7	96.1	96.8	106	Not Found	Not Found	Not Found	High	Not Found	Not Found	Not Found	Not Found	Not Found
FALSE	High	Master Protein	P23919	Thymidylate kinase OS=Homo sapiens OX=9606 GN=DTYMK PE=1 SV=4	0	19.834	26	6	7	6	1	212	23.8	8.27	19.9	6	0	99.5	92.5	96	95.5	102	119.9	Not Found	High	High	Not Found	High	High	High	High	Not Found
FALSE	High	Master Protein	Q9Y6I3	Epsin-1 OS=Homo sapiens OX=9606 GN=EPN1 PE=1 SV=2	0	19.818	9	4	4	4	1	576	60.3	4.83	13.86	4	0	98.3	102.5	98	97.1	100.2	114.1	Not Found	High	Not Found	Not Found	High	Not Found	Not Found	Not Found	Not Found
FALSE	High	Master Protein	O14776	Transcription elongation regulator 1 OS=Homo sapiens OX=9606 GN=TCERG1 PE=1 SV=2	0	19.806	6	6	6	6	1	1098	123.8	8.65	19.15	6	0	102.4	99.9	103.2	96.2	99.6	101.9	Not Found	High	High	High	High	High	Not Found	Not Found	Not Found
FALSE	High	Master Protein	O95810	Caveolae-associated protein 2 OS=Homo sapiens OX=9606 GN=CAVIN2 PE=1 SV=3	0	19.747	14	5	5	5	1	425	47.1	5.21	16.36	5	0	110.9	101.8	102	92.3	102.8	96.2	High	High	High	Not Found	High	Not Found	Not Found	Not Found	Not Found
FALSE	High	Master Protein	Q14839	Chromodomain-helicase-DNA-binding protein 4 OS=Homo sapiens OX=9606 GN=CHD4 PE=1 SV=2	0	19.711	3	5	5	4	1	1912	217.9	5.86	16.61	5	1	105.1	101.7	107.8	95.5	97.1	98.3	Not Found	Not Found	High	Not Found	Not Found	High	Not Found	High	Not Found
FALSE	High	Master Protein	P25445	Tumor necrosis factor receptor superfamily member 6 OS=Homo sapiens OX=9606 GN=FAS PE=1 SV=1	0	19.681	11	3	4	3	1	335	37.7	7.94	15.88	3	0	98	106.3	101.8	105.4	97.5	99.5	Not Found	High	Not Found	High	Not Found	Not Found	Not Found	Not Found	Not Found
FALSE	High	Master Protein	Q9ULC4	Malignant T-cell-amplified sequence 1 OS=Homo sapiens OX=9606 GN=MCTS1 PE=1 SV=1	0	19.672	31	4	5	4	1	181	20.5	8.82	17.51	4	0	96.4	104.5	94	98.7	101.4	96.7	Not Found	Not Found	Not Found	Not Found	High	Not Found	High	Not Found	Not Found
FALSE	High	Master Protein	O15270	Serine palmitoyltransferase 2 OS=Homo sapiens OX=9606 GN=SPTLC2 PE=1 SV=1	0	19.661	6	3	4	3	1	562	62.9	7.78	14.75	3	0	99.5	97.9	96.6	97.9	97.4	105.6	Not Found	Not Found	High	Not Found	Not Found	High	High	Not Found	Not Found
FALSE	High	Master Protein	Q8IYI6	Exocyst complex component 8 OS=Homo sapiens OX=9606 GN=EXOC8 PE=1 SV=2	0	19.64	6	4	5	4	1	725	81.7	5.49	17.77	4	0	96	99.7	94.9	103.3	95.7	115	Not Found	Not Found	High	High	Not Found	High	High	Not Found	High
FALSE	High	Master Protein	P30049	ATP synthase subunit delta, mitochondrial OS=Homo sapiens OX=9606 GN=ATP5F1D PE=1 SV=2	0	19.603	14	2	8	2	1	168	17.5	5.49	24.71	2	0	117.8	108.5	112	93.6	97.6	83.9	High	High	High	High	High	Not Found	Not Found	Not Found	Not Found
FALSE	High	Master Protein	P01024	Complement C3 OS=Homo sapiens OX=9606 GN=C3 PE=1 SV=2	0	19.567	2	3	4	3	1	1663	187	6.4	14.8	3	0	75.5	98.2	96	114.4	95.4	98.7	Not Found	Not Found	High	High	Not Found	High	Not Found	Not Found	Not Found
FALSE	High	Master Protein	P02765	Alpha-2-HS-glycoprotein OS=Homo sapiens OX=9606 GN=AHSG PE=1 SV=2	0	19.55	5	3	37	3	1	367	39.3	5.72	116.55	3	0	66	113.9	90.3	141.2	77.3	50.6	High	High	High	Not Found	High	High	High	High	High
FALSE	High	Master Protein	O15427	Monocarboxylate transporter 4 OS=Homo sapiens OX=9606 GN=SLC16A3 PE=1 SV=1	0	19.547	8	4	11	4	1	465	49.4	7.96	34.11	4	0	105.8	98.4	99.7	99.6	109.8	113.6	High	High	Not Found	High	High	High	Not Found	High	Not Found
FALSE	High	Master Protein	P83881	60S ribosomal protein L36a OS=Homo sapiens OX=9606 GN=RPL36A PE=1 SV=2	0	19.542	37	5	20	1	1	106	12.4	10.58	56.56	5	4	101.2	102.5	102.7	98.3	99.8	91	Not Found	Not Found	Not Found	High	High	Not Found	Not Found	Not Found	Not Found
FALSE	High	Master Protein	P08579	U2 small nuclear ribonucleoprotein B'' OS=Homo sapiens OX=9606 GN=SNRPB2 PE=1 SV=1	0	19.518	19	5	8	3	1	225	25.5	9.72	23.17	5	0	97.9	96.1	99.1	100.4	98.6	103.2	Not Found	Not Found	Not Found	High	Not Found	Not Found	High	Not Found	Not Found
FALSE	High	Master Protein	Q5H9R7	Serine/threonine-protein phosphatase 6 regulatory subunit 3 OS=Homo sapiens OX=9606 GN=PPP6R3 PE=1 SV=2	0	19.501	4	3	3	3	1	873	97.6	4.6	11.7	3	0	97.8	100.8	90.9	95	98.6	112.9	Not Found	Not Found	High	Not Found	High	Not Found	Not Found	Not Found	Not Found
FALSE	High	Master Protein	Q9Y5M8	Signal recognition particle receptor subunit beta OS=Homo sapiens OX=9606 GN=SRPRB PE=1 SV=3	0	19.494	21	5	5	5	1	271	29.7	9.04	15.85	5	0	111.2	98.6	106.8	101.3	105	91.8	Not Found	High	Not Found	Not Found	High	High	Not Found	Not Found	Not Found
FALSE	High	Master Protein	P69905	Hemoglobin subunit alpha OS=Homo sapiens OX=9606 GN=HBA1 PE=1 SV=2	0	19.423	33	4	7	4	1	142	15.2	8.68	21.41	4	0	86.8	94.3	92.3	102.1	99.2	85.9	Not Found	High	High	Not Found	Not Found	High	High	High	Not Found
FALSE	High	Master Protein	O75323	Protein NipSnap homolog 2 OS=Homo sapiens OX=9606 GN=NIPSNAP2 PE=1 SV=1	0	19.397	14	5	8	3	1	286	33.7	9.36	23.73	5	0	99.8	101	97.8	101.4	105.2	100.7	Not Found	Not Found	Not Found	Not Found	High	High	High	Not Found	Not Found
FALSE	High	Master Protein	P25325	3-mercaptopyruvate sulfurtransferase OS=Homo sapiens OX=9606 GN=MPST PE=1 SV=3	0	19.393	19	5	6	5	1	297	33.2	6.6	17.47	5	0	100.6	93.7	99.7	100.3	98.4	109.8	High	Not Found	Not Found	Not Found	High	High	High	Not Found	High
[truncated: 2,113 more rows]
