# Supplementary material for: Integrative Proteomic and Phosphoproteomic Analyses of Hypoxia-Treated Pulmonary Artery Smooth Muscle Cells
Source: Proteomes. 2022 Jun 28;10(3):23. doi: 10.3390/proteomes10030023 (PMC9326561; doi:10.3390/proteomes10030023)
Supplement: Supplementary file 1 [file proteomes-10-00023-s001.zip › Table S3-Protein Discoverer software searching result for phosphoproteomic analysis.xlsx]

## Sheet: PeptideGroups
Checked	Confidence	Annotated Sequence	Modifications	Modifications in Master Proteins	Qvality PEP	Qvality q-value	# Protein Groups	# Proteins	# PSMs	Master Protein Accessions	Positions in Master Proteins	# Missed Cleavages	Theo. MH+ [Da]	# Razor Quan Results	Abundances (Scaled): F11: 126, Sample	Abundances (Scaled): F11: 127C, Sample	Abundances (Scaled): F11: 128N, Sample	Abundances (Scaled): F11: 130N, Sample	Abundances (Scaled): F11: 130C, Sample	Abundances (Scaled): F11: 131, Sample	Quan Info	Found in Fraction: F11.1	Found in Fraction: F11.2	Found in Fraction: F11.3	Found in Fraction: F11.4	Found in Fraction: F11.5	Found in Fraction: F11.6	Found in Fraction: F11.7	Found in Fraction: F11.8	Found in Fraction: F11.9	Found in Fraction: F11.10	Found in Fraction: F11.11	Found in Sample: [S55] F11: 126, Sample	Percolator q-Value (by Search Engine): Sequest HT	Percolator PEP (by Search Engine): Sequest HT	XCorr (by Search Engine): Sequest HT
FALSE	High	[K].RLSLPADIR.[IL]	1xPhospho [S3]; 1xTMT6plex [N-Term]	Q00537 1xPhospho [S146]; Q00536 1xPhospho [S119]	0.00342816	0.000108793	2	2	2	Q00537; Q00536	Q00537 [144-152]; Q00536 [117-125]	1	1349.75	0	88	94.4	89.3	91	104.5	115.8	Shared	Not Found	Not Found	Not Found	Not Found	Not Found	High	Not Found	Not Found	Not Found	Not Found	Not Found	High	0.0003628	0.00626	3.46
FALSE	High	[K].YGDLLPADGILIQGNDLK.[I]	1xTMT6plex [K18]; 1xTMT6plex [N-Term]		4.71273e-08	0	2	2	1	P20020; P23634	P20020 [220-237]; P23634 [216-233]	0	2373.34	0	100	93.6	90	97.7	103	118.8	Shared	Not Found	Not Found	Not Found	Not Found	Not Found	Not Found	Not Found	Not Found	Not Found	High	Not Found	High	0	7.646e-09	5.05
FALSE	High	[K].LDTFCGSPPYAAPELFQGK.[K]	1xCarbamidomethyl [C5]; 1xPhospho [T3]; 1xTMT6plex [K19]; 1xTMT6plex [N-Term]	Q7KZI7 1xPhospho [T208]; P27448 1xPhospho [T211]	1.01726e-06	0	2	4	4	Q7KZI7; P27448	Q7KZI7 [206-224]; P27448 [209-227]	0	2636.29	0	101.2	139.3	94.3	111.8	89.9	78.7	Shared	Not Found	Not Found	Not Found	Not Found	Not Found	Not Found	High	High	Not Found	Not Found	Not Found	High	0	1.317e-07	5.22
FALSE	High	[R].TTPSYVAFTDTER.[L]	1xTMT6plex [N-Term]		0.0309114	0.000389981	2	6	1	P11142; P0DMV9	P11142 [37-49]; P0DMV9 [37-49]	0	1716.86	0	94.2	100.5	91.2	88.4	108.1	126.1	Shared	Not Found	Not Found	Not Found	Not Found	Not Found	Not Found	Not Found	Not Found	Not Found	High	Not Found	High	0.0001904	0.002574	2.23
FALSE	High	[R].ELISNASDALDK.[I]	1xTMT6plex [K12]; 1xTMT6plex [N-Term]		7.27947e-07	0	2	2	4	P14625; P08238	P14625 [103-114]; P08238 [42-53]	0	1733.97	0	92.2	94.3	90.2	90.3	110.6	125.8	Shared	Not Found	Not Found	Not Found	Not Found	Not Found	Not Found	Not Found	Not Found	High	High	Not Found	High	0	9.658e-08	4.7
FALSE	High	[K].EIIDLVLDR.[I]	1xTMT6plex [N-Term]		0.000277412	0	2	3	3	P68363; Q9BQE3	P68363 [113-121]; Q9BQE3 [113-121]	0	1314.78	0	90	90.5	88.9	97.8	102.9	128.3	Shared	Not Found	Not Found	Not Found	Not Found	Not Found	High	High	Not Found	Not Found	High	Not Found	High	0	2.32e-05	2.93
FALSE	High	[R].SASEPSLHR.[AT]	1xPhospho [S3]; 1xTMT6plex [N-Term]	P04049 1xPhospho [S621]; P10398 1xPhospho [S582]	0.0100346	0.000209539	2	2	7	P04049; P10398	P04049 [619-627]; P10398 [580-588]	0	1292.62	0	91.2	84	94.4	90.5	102.9	128.5	Shared	High	High	High	Not Found	Not Found	High	Not Found	High	Not Found	Not Found	High	High	6.142e-05	0.0006075	3.22
FALSE	High	[R].QKASIHEAWTDGK.[E]	1xPhospho [S4]; 2xTMT6plex [K2; K13]; 1xTMT6plex [N-Term]	P12814 1xPhospho [S404]; O43707 1xPhospho [S423]	8.54319e-05	0	2	2	3	P12814; O43707	P12814 [401-413]; O43707 [420-432]	1	2238.19	0	90.3	104.9	99	125	97.7	74.3	Shared	Not Found	Not Found	Not Found	Not Found	Not Found	High	High	Not Found	Not Found	Not Found	Not Found	High	0	7.952e-06	3.64
FALSE	High	[R].IDIAGR.[ED]	1xTMT6plex [N-Term]		0.00884211	0.000209539	4	14	15	P61163; P61160; P60709; P68032	P61163 [183-188]; P61160 [182-187]; P60709 [178-183]; P68032 [180-185]	0	873.536	0	97.2	84.4	90.7	96.4	109.8	137.5	Shared	Not Found	Not Found	Not Found	Not Found	Not Found	High	High	High	Not Found	Not Found	Not Found	High	0.0001195	0.0007527	2.59
FALSE	High	[R].ALTVPELTQQMFDAK.[N]	1xOxidation [M11]; 1xTMT6plex [K15]; 1xTMT6plex [N-Term]		0.000100991	0	2	3	1	Q13509; P68371	Q13509 [283-297]; P68371 [283-297]	0	2166.19	0	91.5	100.7	92.1	96.8	97.3	117.7	Shared	Not Found	Not Found	Not Found	Not Found	Not Found	Not Found	Not Found	Not Found	Not Found	High	Not Found	High	0	9.22e-06	3.81
FALSE	High	[K].LSPSPSSR.[V]	1xPhospho [S4]; 1xTMT6plex [N-Term]	P20700 1xPhospho [S393]; Q03252 1xPhospho [S407]	0.183358	0.00705008	2	2	3	P20700; Q03252	P20700 [390-397]; Q03252 [404-411]	0	1139.57	0	102.9	81.3	99.5	80.2	105.7	135.9	Shared	Not Found	Not Found	Not Found	High	Not Found	Not Found	Not Found	High	High	Not Found	Not Found	High	0.004974	0.07618	2.32
FALSE	High	[K].LDKENALDR.[A]	1xTMT6plex [K3]; 1xTMT6plex [N-Term]		0.0753668	0.00210549	3	3	2	P09493; P07951; P06753	P09493 [13-21]; P07951 [13-21]; P06753 [14-22]	1	1531.88	0	99.9	106.6	107.9	96.7	99.9	116.4	Shared	Not Found	Not Found	Not Found	Not Found	Not Found	Not Found	Not Found	Not Found	Not Found	High	Not Found	High	0.0007236	0.01056	2.85
FALSE	High	[R].RWSLASLPSSGYGTNTPSSTVSSSCSSQEK.[L]	1xCarbamidomethyl [C25]; 1xPhospho [S3]; 1xTMT6plex [K30]; 1xTMT6plex [N-Term]	Q6P0Q8 1xPhospho [S230]; O15021 1xPhospho [S285]	1.77291e-06	0	2	2	1	Q6P0Q8; O15021	Q6P0Q8 [228-257]; O15021 [283-312]	1	3686.74	0	88.2	88.9	113.4	82.7	112.4	86.7	Shared	Not Found	Not Found	Not Found	Not Found	Not Found	Not Found	Not Found	High	Not Found	Not Found	Not Found	High	0	2.209e-07	5.35
FALSE	High	[K].LNQSGTSVGTDEESDVTQEEER.[D]	1xPhospho [T/S]; 1xTMT6plex [N-Term]	P49792 1xPhospho [T/S]; A6NKT7 1xPhospho [T/S]	1.25243e-08	0	2	5	7	P49792; A6NKT7	P49792 [2284-2305]; A6NKT7 [1309-1330]	0	2719.18	0	98.7	98.9	105.4	98.2	102.2	101.9	Shared	High	Not Found	High	Not Found	Not Found	Not Found	Not Found	Not Found	Not Found	Not Found	High	High	0	2.234e-09	5.21
FALSE	High	[R].GTSPRPPEGGLGYSQLGDDDLK.[E]	1xPhospho [S/Y/T]; 1xTMT6plex [K22]; 1xTMT6plex [N-Term]	Q9UQ88 1xPhospho [S/T/Y]; P21127 1xPhospho [S/T/Y]	0.0149514	0.000295797	2	2	9	Q9UQ88; P21127	Q9UQ88 [738-759]; P21127 [750-771]	0	2797.38	0	96.2	104.7	101.4	96	96.3	91	Shared	Not Found	Not Found	Not Found	High	High	Not Found	Not Found	Not Found	Not Found	Not Found	Not Found	High	0.0001658	0.00164	4.21
FALSE	High	[R].RTPSDDEEDNLFAPPK.[L]	1xPhospho [S/T]; 1xTMT6plex [K16]; 1xTMT6plex [N-Term]	Q9Y4E1 1xPhospho [S/T]; Q641Q2 1xPhospho [S/T]	3.50886e-06	0	2	2	5	Q9Y4E1; Q641Q2	Q9Y4E1 [330-345]; Q641Q2 [330-345]	1	2369.14	0	98	96	98.3	95.8	106.6	106.8	Shared	Not Found	High	Not Found	High	High	Not Found	Not Found	Not Found	Not Found	Not Found	Not Found	High	0	4.16e-07	5.71
FALSE	High	[K].EGLELPEDEEEKKK.[QM]	3xTMT6plex [K12; K13; K14]; 1xTMT6plex [N-Term]		0.00714392	0.000108793	2	4	1	P07900; P08238	P07900 [547-560]; P08238 [539-552]	2	2589.48	0	96.2	127.7	100.4	127.5	70.5	52.3	Shared	Not Found	Not Found	Not Found	Not Found	Not Found	Not Found	Not Found	Not Found	Not Found	High	Not Found	High	3.165e-05	0.0004157	3.5
FALSE	High	[K].EGLELPEDEEEKK.[KI]	2xTMT6plex [K12; K13]; 1xTMT6plex [N-Term]		2.25535e-05	0	2	5	1	P07900; P08238	P07900 [547-559]; P08238 [539-551]	1	2232.22	0	104.2	127.2	102.9	101.8	73.5	66.6	Shared	Not Found	Not Found	Not Found	Not Found	Not Found	Not Found	Not Found	Not Found	Not Found	High	Not Found	High	0	2.323e-06	3.9
FALSE	High	[K].EGLELPEDEEEK.[K]	1xTMT6plex [K12]; 1xTMT6plex [N-Term]		0.000112405	0	2	5	5	P07900; P08238	P07900 [547-558]; P08238 [539-550]	0	1874.96	0	101.5	118	93.9	96.9	83.9	87.8	Shared	High	High	High	Not Found	Not Found	Not Found	Not Found	Not Found	Not Found	High	Not Found	High	0	1.018e-05	3.13
FALSE	High	[R].GVVDSEDIPLNLSR.[E]	1xTMT6plex [N-Term]		2.33385e-08	0	2	3	6	P07900; P08238	P07900 [387-400]; P08238 [379-392]	0	1742.95	0	95.6	88.5	89.8	85.9	114.7	148.5	Shared	Not Found	Not Found	Not Found	Not Found	Not Found	Not Found	Not Found	Not Found	Not Found	High	Not Found	High	0	3.986e-09	4.33
FALSE	High	[R].LSLPADIR.[IL]	1xPhospho [S2]; 1xTMT6plex [N-Term]	Q00537 1xPhospho [S146]; Q00536 1xPhospho [S119]	0.186564	0.00721218	2	2	1	Q00537; Q00536	Q00537 [145-152]; Q00536 [118-125]	0	1193.65	0	77.2	105.8	110.3	105.6	90.3	102.8	Shared	Not Found	Not Found	Not Found	Not Found	High	Not Found	Not Found	Not Found	Not Found	Not Found	Not Found	High	0.002945	0.04424	2.6
FALSE	High	[R].NLDIERPTYTNLNR.[L]	1xTMT6plex [N-Term]		0.000814502	0	3	7	1	P68363; Q9BQE3; P68366	P68363 [216-229]; Q9BQE3 [216-229]; P68366 [216-229]	0	1948.04	0	93.1	97.1	92	110.5	94.9	85.9	Shared	Not Found	Not Found	Not Found	Not Found	Not Found	Not Found	Not Found	Not Found	Not Found	High	Not Found	High	0	5.951e-05	4.16
FALSE	High	[K].GYEEWLLNEIR.[R]	1xTMT6plex [N-Term]		0.00124123	0.000108793	2	3	1	P12814; O43707	P12814 [377-387]; O43707 [396-406]	0	1650.87	0	105.7	85.5	95.3	91.2	107.4	136.7	Shared	Not Found	Not Found	Not Found	Not Found	Not Found	Not Found	Not Found	Not Found	Not Found	High	Not Found	High	3.165e-05	8.38e-05	2.77
FALSE	High	[K].EITALAPSTMK.[I]	1xTMT6plex [K11]; 1xTMT6plex [N-Term]		0.000195888	0	2	6	2	P60709; P68032	P60709 [316-326]; P68032 [318-328]	0	1619.94	0	95.9	103.3	104.5	106.3	109	86.5	Shared	Not Found	Not Found	Not Found	Not Found	Not Found	Not Found	Not Found	High	Not Found	Not Found	Not Found	High	0	1.692e-05	3.24
FALSE	High	[K].EITALAPSTMK.[I]	1xPhospho [S/T]; 1xTMT6plex [K11]; 1xTMT6plex [N-Term]	P60709 1xPhospho [S/T]; P68032 1xPhospho [S/T]	0.00143791	0.000108793	2	6	2	P60709; P68032	P60709 [316-326]; P68032 [318-328]	0	1699.91	0	101.1	101.9	104.6	94.9	96.1	81.9	Shared	Not Found	Not Found	Not Found	Not Found	Not Found	High	Not Found	Not Found	Not Found	Not Found	Not Found	High	3.165e-05	9.445e-05	3.24
FALSE	High	[R].AVFVDLEPTVIDEVR.[T]	1xTMT6plex [N-Term]		1.10233e-06	0	2	3	3	P68363; Q9BQE3	P68363 [65-79]; Q9BQE3 [65-79]	0	1931.07	0	80.6	87	81.1	90.3	107	151.9	Shared	Not Found	Not Found	Not Found	Not Found	Not Found	High	Not Found	Not Found	Not Found	High	Not Found	High	0	1.932e-07	4.31
FALSE	High	[R].LSVDYGK.[K]	1xTMT6plex [K7]; 1xTMT6plex [N-Term]		0.141473	0.00498335	3	5	1	P68363; Q9BQE3; P68366	P68363 [157-163]; Q9BQE3 [157-163]; P68366 [157-163]	0	1239.73	0	108.2	99.9	101.6	107.7	94.1	72.3	Shared	Not Found	Not Found	Not Found	Not Found	Not Found	Not Found	Not Found	High	Not Found	Not Found	Not Found	High	0.001833	0.02934	1.55
FALSE	High	[R].GILTLK.[Y]	1xTMT6plex [K6]; 1xTMT6plex [N-Term]		0.026057	0.000295797	2	10	8	P60709; P68032	P60709 [63-68]; P68032 [65-70]	0	1102.76	0	98.2	63.8	83.7	97.3	110.5	154.2	Shared	High	High	Not Found	Not Found	Not Found	Not Found	Not Found	Not Found	Not Found	Not Found	Not Found	High	0.0003161	0.004665	1.76
FALSE	High	[R].AVVIVDDR.[G]	1xTMT6plex [N-Term]		0.197595	0.00837906	2	2	1	P23246; Q15233	P23246 [400-407]; Q15233 [177-184]	0	1115.66	0	93.8	86.7	89.6	86.4	95	164.2	Shared	Not Found	Not Found	Not Found	Not Found	Not Found	Not Found	Not Found	Not Found	Not Found	High	Not Found	High	0.003271	0.0477	2.37
FALSE	High	[K].EQLLDCEGEDGWNK.[L]	1xCarbamidomethyl [C6]; 1xTMT6plex [K14]; 1xTMT6plex [N-Term]		3.60495e-07	0	2	5	1	P49792; A6NKT7	P49792 [136-149]; A6NKT7 [136-149]	0	2151.04	0	101.6	96.9	104.4	86.1	106.2	116.3	Shared	Not Found	Not Found	Not Found	Not Found	Not Found	Not Found	Not Found	Not Found	Not Found	High	Not Found	High	0	5.028e-08	4.75
FALSE	High	[K].AYSFCGTVEYMAPEVVNR.[RQ]	1xCarbamidomethyl [C5]; 1xPhospho [S3]; 1xTMT6plex [N-Term]	P51812 1xPhospho [S227]; Q15418 1xPhospho [S221]	2.24143e-07	0	2	3	1	P51812; Q15418	P51812 [225-242]; Q15418 [219-236]	0	2402.08	0	94.7	87.7	97.1	92.9	95.9	133.2	Shared	Not Found	Not Found	Not Found	Not Found	Not Found	High	Not Found	Not Found	Not Found	Not Found	Not Found	High	0	3.233e-08	5.82
FALSE	High	[K].IEISELNR.[V]	1xTMT6plex [N-Term]		0.0341025	0.000389981	2	2	1	P35908; P04264	P35908 [394-401]; P04264 [396-403]	0	1202.69	0	99.8	100.4	96.7	110.8	117.8	107.3	Shared	Not Found	Not Found	Not Found	Not Found	Not Found	Not Found	Not Found	Not Found	Not Found	High	Not Found	High	0.0001904	0.002981	2.46
FALSE	High	[K].SEPVKEESSELEQPFAQDTSSVGPDR.[K]	1xPhospho [S/T]; 1xTMT6plex [K5]; 1xTMT6plex [N-Term]	Q15424 1xPhospho [T/S]; Q14151 1xPhospho [T/S]	0.000761809	0	2	2	14	Q15424; Q14151	Q15424 [227-252]; Q14151 [226-251]	1	3386.6	0	100	110.9	107.4	101.4	96.4	86	Shared	Not Found	High	High	Not Found	Not Found	Not Found	Not Found	Not Found	Not Found	Not Found	High	High	3.165e-05	0.0001261	3.88
FALSE	High	[K].SEPVKEESSELEQPFAQDTSSVGPDR.[K]	1xTMT6plex [K5]; 1xTMT6plex [N-Term]		1.21844e-05	0	2	2	1	Q15424; Q14151	Q15424 [227-252]; Q14151 [226-251]	1	3306.64	0	94.7	96.7	100	103.6	105.4	92.4	Shared	Not Found	Not Found	Not Found	Not Found	Not Found	Not Found	Not Found	Not Found	Not Found	High	Not Found	High	0	1.315e-06	5.71
FALSE	High	[K].EITALAPSTMK.[I]	1xOxidation [M10]; 1xTMT6plex [K11]; 1xTMT6plex [N-Term]		0.00169947	0.000108793	2	6	1	P60709; P68032	P60709 [316-326]; P68032 [318-328]	0	1635.94	0	86.5	71.6	87.9	75	112.6	181.2	Shared	Not Found	Not Found	Not Found	Not Found	Not Found	Not Found	Not Found	High	Not Found	Not Found	Not Found	High	3.165e-05	0.0001083	2.89
FALSE	High	[K].EQADFAIEALAK.[A]	1xTMT6plex [K12]; 1xTMT6plex [N-Term]		5.20785e-06	0	2	2	2	P35579; Q7Z406	P35579 [408-419]; Q7Z406 [434-445]	0	1763.99	0	92.3	107.5	91.6	90.5	114.2	129.5	Shared	Not Found	Not Found	Not Found	Not Found	Not Found	Not Found	Not Found	Not Found	Not Found	High	Not Found	High	0	5.977e-07	3.94
FALSE	High	[K].YIDQEELNK.[T]	1xTMT6plex [K9]; 1xTMT6plex [N-Term]		8.65831e-05	0	2	4	4	P07900; P08238	P07900 [284-292]; P08238 [276-284]	0	1609.88	0	94.6	100.9	98.6	97.6	94.8	98.5	Shared	Not Found	Not Found	Not Found	Not Found	High	Not Found	Not Found	Not Found	Not Found	High	Not Found	High	0	8.733e-06	4.08
FALSE	High	[R].EPAEQPGDGER.[T]	1xTMT6plex [N-Term]		5.64337e-06	0	2	2	1	Q15424; Q14151	Q15424 [296-306]; Q14151 [295-305]	0	1413.68	0	96.9	76.3	99.9	81.8	111.8	151.2	Shared	Not Found	Not Found	Not Found	Not Found	Not Found	Not Found	Not Found	Not Found	Not Found	High	Not Found	High	0	6.431e-07	3.4
FALSE	High	[K].CGDLEEELK.[NI]	1xCarbamidomethyl [C1]; 1xTMT6plex [K9]; 1xTMT6plex [N-Term]		0.00816272	0.000108793	2	2	1	P67936; P07951	P67936 [154-162]; P07951 [190-198]	0	1550.81	0	102.8	131.9	97.1	90.8	97.3	93.1	Shared	Not Found	Not Found	Not Found	Not Found	Not Found	Not Found	Not Found	Not Found	Not Found	High	Not Found	High	3.165e-05	0.0004785	2.51
FALSE	High	[R].CIIPNHEK.[RK]	1xCarbamidomethyl [C1]; 1xTMT6plex [K8]; 1xTMT6plex [N-Term]		0.0188549	0.000295797	2	3	1	P35580; P35579	P35580 [678-685]; P35579 [671-678]	0	1468.83	0	109.9	101.5	100.9	119	95.9	88.5	Shared	Not Found	Not Found	Not Found	Not Found	Not Found	Not Found	Not Found	High	Not Found	Not Found	Not Found	High	0.000144	0.0013	2.42
FALSE	High	[KR].IEEEIR.[AHQVRE]	1xTMT6plex [N-Term]		0.120892	0.00345766	4	9	6	Q15149; Q9ULE0; Q8IY63; Q07065	Q15149 [1587-1592]; Q9ULE0 [307-312]; Q8IY63 [595-600]; Q07065 [373-378]	0	1017.58	1	101.7	91.6	101.5	79	104.1	115.9	Shared	High	Not Found	Not Found	Not Found	Not Found	Not Found	Not Found	Not Found	Not Found	Not Found	High	High	0.002113	0.03557	1.85
FALSE	High	[R].SRPTSFADELAAR.[I]	2xPhospho [T4; S5]; 1xTMT6plex [N-Term]	Q9Y4E1 2xPhospho [T287; S288]; Q641Q2 2xPhospho [T287; S288]	0.0364056	0.000484649	2	2	2	Q9Y4E1; Q641Q2	Q9Y4E1 [284-296]; Q641Q2 [284-296]	0	1809.81	0	89.9	85.1	100.8	84.4	89.9	137.7	Shared	Not Found	Not Found	Not Found	Not Found	Not Found	Not Found	Not Found	Not Found	Not Found	Not Found	High	High	0.000216	0.003317	2.18
FALSE	High	[K].ELYTLLNENYVEDDDNMFR.[F]	1xTMT6plex [N-Term]		1.90976e-09	0	2	2	1	O60551; P30419	O60551 [173-191]; P30419 [171-189]	0	2622.22	0	102.9	86.7	96.7	83.2	104.6	132	Shared	Not Found	Not Found	Not Found	Not Found	Not Found	Not Found	Not Found	Not Found	Not Found	High	Not Found	High	0	3.921e-10	5.42
FALSE	High	[R].EIVHLQAGQCGNQIGAK.[F]	1xCarbamidomethyl [C10]; 1xTMT6plex [K17]; 1xTMT6plex [N-Term]		7.83561e-07	0	4	6	4	Q13885; Q13509; P07437; P68371	Q13885 [3-19]; Q13509 [3-19]; P07437 [3-19]; P68371 [3-19]	0	2281.25	0	81.6	85	85.6	115.3	105.1	115.9	Shared	Not Found	Not Found	Not Found	Not Found	Not Found	Not Found	Not Found	High	Not Found	Not Found	Not Found	High	0	1.036e-07	3.91
FALSE	High	[K].CQLEINFNTLQTK.[L]	1xCarbamidomethyl [C1]; 1xPhospho [T9]; 1xTMT6plex [K13]; 1xTMT6plex [N-Term]	P12814 1xPhospho [T340]; O43707 1xPhospho [T359]	0.000635939	0	2	4	1	P12814; O43707	P12814 [332-344]; O43707 [351-363]	0	2147.1	0	99.6	107.9	102.5	96	106	96	Shared	Not Found	Not Found	Not Found	Not Found	Not Found	Not Found	High	Not Found	Not Found	Not Found	Not Found	High	0	4.807e-05	3.42
FALSE	High	[K].MDENQFVAVTSTNAAK.[VI]	1xTMT6plex [K16]; 1xTMT6plex [N-Term]		1.0592e-07	0	2	3	1	Q16555; Q14195	Q16555 [375-390]; Q14195 [375-390]	0	2184.14	0	92.1	92.2	89.5	107.5	101.7	96.3	Shared	Not Found	Not Found	Not Found	Not Found	Not Found	Not Found	High	Not Found	Not Found	Not Found	Not Found	High	0	1.623e-08	4.49
FALSE	High	[R].LFVGSIPK.[NS]	1xPhospho [S5]; 1xTMT6plex [K8]; 1xTMT6plex [N-Term]	O43390 1xPhospho [S252]; O60506 1xPhospho [S249]	0.02857	0.000295797	2	2	1	O43390; O60506	O43390 [248-255]; O60506 [245-252]	0	1398.82	0	93.6	95.2	97.8	101.9	115	132.4	Shared	Not Found	Not Found	Not Found	Not Found	Not Found	Not Found	Not Found	High	Not Found	Not Found	Not Found	High	0.0001658	0.002283	1.7
FALSE	High	[KR].LAEQAER.[Y]	1xTMT6plex [N-Term]		0.0599295	0.00130733	6	7	1	P63104; P31946; Q04917; P61981; P27348; P62258	P63104 [12-18]; P31946 [14-20]; Q04917 [13-19]; P61981 [13-19]; P27348 [12-18]; P62258 [13-19]	0	1045.58	0	90.6	91.9	92.3	92.3	100.8	135.6	Shared	Not Found	Not Found	Not Found	Not Found	Not Found	Not Found	Not Found	Not Found	Not Found	High	Not Found	High	0.0004359	0.007262	2.5
FALSE	High	[K].STAALEEDAQILK.[V]	1xPhospho [S/T]; 1xTMT6plex [K13]; 1xTMT6plex [N-Term]	Q15052 1xPhospho [S/T]; Q14155 1xPhospho [S/T]	2.73846e-05	0	2	2	5	Q15052; Q14155	Q15052 [649-661]; Q14155 [703-715]	0	1927.02	0	102.8	99.2	95.4	92.5	97.6	120.9	Shared	Not Found	High	High	High	Not Found	Not Found	Not Found	Not Found	Not Found	Not Found	Not Found	High	0	2.778e-06	4.24
FALSE	High	[R].EDALDDSVSSSSVHASPLASSPVR.[K]	2xPhospho [S]; 1xTMT6plex [N-Term]	P49792 2xPhospho [S]; A6NKT7 2xPhospho [S]	1.05188e-06	0	2	5	5	P49792; A6NKT7	P49792 [2231-2254]; A6NKT7 [1256-1279]	0	2802.24	0	89.2	95.7	100.9	83.6	109.2	115.5	Shared	Not Found	Not Found	Not Found	Not Found	Not Found	Not Found	Not Found	Not Found	Not Found	Not Found	High	High	0	1.356e-07	5.79
FALSE	High	[R].EDALDDSVSSSSVHASPLASSPVR.[K]	1xPhospho [S]; 1xTMT6plex [N-Term]	P49792 1xPhospho [S]; A6NKT7 1xPhospho [S]	5.04388e-12	0	2	5	10	P49792; A6NKT7	P49792 [2231-2254]; A6NKT7 [1256-1279]	0	2722.28	0	102.5	99.5	88.7	69.2	112.3	119.4	Shared	High	High	High	Not Found	Not Found	Not Found	Not Found	Not Found	Not Found	Not Found	High	High	0	1.603e-12	8.1
FALSE	High	[K].EDAANNYAR.[G]	1xTMT6plex [N-Term]		0.00292028	0.000108793	3	7	1	P68363; Q9BQE3; P68366	P68363 [97-105]; Q9BQE3 [97-105]; P68366 [97-105]	0	1252.61	0	81.6	90.2	90.7	93.6	91.9	139.4	Shared	Not Found	Not Found	Not Found	Not Found	Not Found	Not Found	Not Found	Not Found	Not Found	High	Not Found	High	3.165e-05	0.0001716	3.24
FALSE	High	[R].SVVGTPAYLAPEVLR.[SN]	1xPhospho [S1]; 1xTMT6plex [N-Term]	O94806 1xPhospho [S735]; Q15139 1xPhospho [S742]	2.5631e-08	0	2	2	2	O94806; Q15139	O94806 [735-749]; Q15139 [742-756]	0	1881.01	0	89.2	93.6	99	96.2	109.4	118.4	Shared	Not Found	Not Found	Not Found	Not Found	High	High	Not Found	Not Found	Not Found	Not Found	Not Found	High	0	4.342e-09	4.91
FALSE	High	[R].DLTDYLMK.[I]	1xTMT6plex [K8]; 1xTMT6plex [N-Term]		0.000143986	0	2	7	4	P60709; P68032	P60709 [184-191]; P68032 [186-193]	0	1456.81	0	99	91.9	101.9	93.2	109.1	108	Shared	Not Found	Not Found	Not Found	Not Found	Not Found	Not Found	Not Found	High	Not Found	High	Not Found	High	0	5.891e-05	3.33
FALSE	High	[R].DLTDYLMK.[I]	1xOxidation [M7]; 1xTMT6plex [K8]; 1xTMT6plex [N-Term]		0.0356992	0.000484649	2	7	2	P60709; P68032	P60709 [184-191]; P68032 [186-193]	0	1472.81	0	105.1	92.1	109.5	96.4	107.1	97.4	Shared	Not Found	Not Found	Not Found	Not Found	Not Found	Not Found	Not Found	High	Not Found	Not Found	Not Found	High	0.000216	0.003212	2.27
FALSE	High	[KR].SYELPDGQVITIGNER.[F]	1xTMT6plex [N-Term]		1.35783e-10	0	2	10	10	P60709; P68032	P60709 [239-254]; P68032 [241-256]	0	2020.05	0	93.3	87.4	90.3	90	109.2	143.1	Shared	Not Found	Not Found	Not Found	Not Found	High	High	High	Not Found	Not Found	High	Not Found	High	0	1.172e-10	5.33
FALSE	High	[KR].TISPSTSNNIPLMR.[V]	1xPhospho [T/S]; 1xTMT6plex [N-Term]	O94806 1xPhospho [S/T]; Q15139 1xPhospho [S/T]	2.16658e-05	0	2	2	8	O94806; Q15139	O94806 [389-402]; Q15139 [395-408]	0	1839.92	0	92.9	98.9	98.1	109.9	103.3	91.8	Shared	Not Found	Not Found	Not Found	Not Found	Not Found	High	High	Not Found	Not Found	Not Found	Not Found	High	0	2.24e-06	4.47
FALSE	High	[RK].NDNDTFTVK.[Y]	1xTMT6plex [K9]; 1xTMT6plex [N-Term]		0.000208048	0	2	2	1	P21333; Q14315	P21333 [829-837]; Q14315 [824-832]	0	1511.81	0	105.4	108.8	105.8	105.7	93.2	75.9	Shared	Not Found	Not Found	Not Found	Not Found	Not Found	Not Found	Not Found	Not Found	Not Found	High	Not Found	High	0	1.789e-05	3.56
FALSE	High	[R].EDALDDSVSSSSVHASPLASSPVR.[K]	3xPhospho [S12; S16; S20]; 1xTMT6plex [N-Term]	P49792 3xPhospho [S2242; S2246; S2250]; A6NKT7 3xPhospho [S1267; S1271; S1275]	0.000102352	0	2	5	1	P49792; A6NKT7	P49792 [2231-2254]; A6NKT7 [1256-1279]	0	2882.21	0	105.5	119.7	101.4	93.7	108.1	108.9	Shared	Not Found	Not Found	Not Found	Not Found	Not Found	Not Found	Not Found	Not Found	Not Found	Not Found	High	High	0	9.358e-06	3.77
FALSE	High	[R].VIGSGCNLDSAR.[F]	1xCarbamidomethyl [C6]; 1xTMT6plex [N-Term]		2.49352e-05	0	2	4	2	P07195; P00338	P07195 [159-170]; P00338 [158-169]	0	1477.76	0	85.9	93.5	97.1	123.3	94.3	106.1	Shared	Not Found	Not Found	Not Found	Not Found	Not Found	High	High	Not Found	Not Found	Not Found	Not Found	High	0	1.169e-05	2.95
FALSE	High	[K].TIGGGDDSFNTFFSETGAGK.[H]	1xTMT6plex [K20]; 1xTMT6plex [N-Term]		7.74279e-13	0	2	5	13	P68363; Q9BQE3	P68363 [41-60]; Q9BQE3 [41-60]	0	2466.22	0	89.4	91.2	95.8	102.8	103.5	99.3	Shared	Not Found	Not Found	Not Found	Not Found	Not Found	Not Found	High	High	Not Found	High	Not Found	High	0	2.823e-13	7.31
FALSE	High	[K].REPAEQPGDGER.[T]	1xTMT6plex [N-Term]		2.64968e-07	0	2	2	1	Q15424; Q14151	Q15424 [295-306]; Q14151 [294-305]	1	1569.78	0	97.4	81.5	99.8	94.7	100.1	140.1	Shared	Not Found	Not Found	Not Found	Not Found	Not Found	Not Found	Not Found	Not Found	Not Found	High	Not Found	High	0	3.775e-08	4.83
FALSE	High	[KR].KHEAFESDLAAHQDR.[V]	1xTMT6plex [K1]; 1xTMT6plex [N-Term]		0.0186069	0.000295797	2	3	1	P12814; O43707	P12814 [436-450]; O43707 [455-469]	1	2212.15	0	87.8	92	82.3	85.4	105.2	150.1	Shared	Not Found	Not Found	Not Found	Not Found	Not Found	Not Found	Not Found	Not Found	Not Found	High	Not Found	High	0.000144	0.001269	2.42
FALSE	High	[K].DSYVGDEAQSK.[R]	1xTMT6plex [K11]; 1xTMT6plex [N-Term]		3.32675e-07	0	2	6	21	P60709; P68032	P60709 [51-61]; P68032 [53-63]	0	1656.85	0	107.2	101.4	111.2	94.2	92.3	87.6	Shared	Not Found	High	High	High	Not Found	Not Found	Not Found	High	Not Found	High	Not Found	High	0	6.296e-07	4.72
FALSE	High	[K].QVELALWDTAGQEDYDR.[L]	1xTMT6plex [N-Term]		1.76151e-07	0	2	3	3	P62745; P61586	P62745 [52-68]; P61586 [52-68]	0	2238.09	0	79.9	87.2	74.6	90.8	106.6	172.1	Shared	Not Found	Not Found	Not Found	Not Found	Not Found	Not Found	Not Found	Not Found	Not Found	High	Not Found	High	0	2.587e-08	4.78
FALSE	High	[K].RDSLEEGELR.[D]	1xPhospho [S3]; 1xTMT6plex [N-Term]	Q9UQ88 1xPhospho [S47]; P21127 1xPhospho [S47]	0.00849566	0.000108793	2	2	2	Q9UQ88; P21127	Q9UQ88 [45-54]; P21127 [45-54]	1	1512.73	0	100.2	87.9	94.2	82.7	99.1	136.2	Shared	High	Not Found	Not Found	Not Found	Not Found	Not Found	Not Found	Not Found	Not Found	Not Found	High	High	0.0001658	0.001941	3.27
FALSE	High	[R].AGVLAHLEEER.[D]	1xTMT6plex [N-Term]		2.28633e-06	0	2	2	1	P35580; P35579	P35580 [772-782]; P35579 [765-775]	0	1452.8	0	105.3	89.6	89.2	90.7	114.7	125.1	Shared	Not Found	Not Found	Not Found	Not Found	Not Found	Not Found	Not Found	Not Found	Not Found	High	Not Found	High	0	2.789e-07	3.63
FALSE	High	[R].KLLEGEESR.[LI]	1xTMT6plex [K1]; 1xTMT6plex [N-Term]		0.0668043	0.00175403	3	5	2	P08729; P08670; P05787	P08729 [394-402]; P08670 [402-410]; P05787 [393-401]	1	1518.89	0	93.3	76	99.9	92.3	119.1	135.5	Shared	Not Found	Not Found	Not Found	Not Found	Not Found	Not Found	High	Not Found	Not Found	High	Not Found	High	0.0005796	0.008695	3.18
FALSE	High	[K].DSLITPHVSR.[S]	2xPhospho [T5; S9]; 1xTMT6plex [N-Term]	P49792 2xPhospho [T2450; S2454]; A6NKT7 2xPhospho [T1475; S1479]	0.0283829	0.000295797	2	7	2	P49792; A6NKT7	P49792 [2446-2455]; A6NKT7 [1471-1480]	0	1513.7	0	108.8	93.7	94.6	79.9	106.4	129.3	Shared	Not Found	Not Found	Not Found	Not Found	Not Found	Not Found	Not Found	Not Found	Not Found	Not Found	High	High	0.0001658	0.002282	2.87
FALSE	High	[R].IQLVEEELDR.[A]	1xTMT6plex [N-Term]		1.21844e-05	0	4	4	4	P67936; P09493; P07951; P06753	P67936 [56-65]; P09493 [92-101]; P07951 [92-101]; P06753 [93-102]	0	1472.82	0	96.1	97.3	94.9	81.7	101.7	146.4	Shared	Not Found	Not Found	Not Found	Not Found	Not Found	Not Found	Not Found	Not Found	Not Found	High	Not Found	High	0	2.48e-06	3.89
FALSE	High	[RK].TQLEELEDELQATEDAK.[L]	1xTMT6plex [K17]; 1xTMT6plex [N-Term]		1.76195e-08	0	2	3	5	P35580; P35579	P35580 [1546-1562]; P35579 [1539-1555]	0	2420.24	0	95.3	112.3	94.8	113.6	111	69	Shared	High	Not Found	Not Found	Not Found	Not Found	Not Found	Not Found	Not Found	Not Found	High	Not Found	High	0	4.472e-08	5.37
FALSE	High	[R].EDALDDSVSSSSVHASPLASSPVRK.[N]	1xPhospho [S]; 1xTMT6plex [K25]; 1xTMT6plex [N-Term]	P49792 1xPhospho [S]; A6NKT7 1xPhospho [S]	2.15374e-08	0	2	5	4	P49792; A6NKT7	P49792 [2231-2255]; A6NKT7 [1256-1280]	1	3079.53	0	100.3	90.1	98.3	87	104.6	101.6	Shared	Not Found	Not Found	Not Found	Not Found	High	Not Found	Not Found	Not Found	Not Found	Not Found	Not Found	High	0	3.71e-09	6.99
FALSE	High	[R].MSGFIYQGK.[IL]	1xPhospho [S2]; 1xTMT6plex [K9]; 1xTMT6plex [N-Term]	Q15052 1xPhospho [S488]; Q14155 1xPhospho [S518]	0.000560039	0	2	2	16	Q15052; Q14155	Q15052 [487-495]; Q14155 [517-525]	0	1568.79	0	102.1	106.5	105.9	113.1	105.5	78.4	Shared	Not Found	Not Found	Not Found	Not Found	Not Found	Not Found	High	High	High	Not Found	Not Found	High	0	4.322e-05	3.62
FALSE	High	[R].TPSDDEEDNLFAPPK.[L]	1xPhospho [T/S]; 1xTMT6plex [K15]; 1xTMT6plex [N-Term]	Q9Y4E1 1xPhospho [S/T]; Q641Q2 1xPhospho [S/T]	3.04878e-06	0	2	2	10	Q9Y4E1; Q641Q2	Q9Y4E1 [331-345]; Q641Q2 [331-345]	0	2213.04	0	94.3	98.7	97.4	90.3	97.8	110	Shared	High	High	High	High	Not Found	Not Found	Not Found	Not Found	Not Found	Not Found	High	High	0	3.644e-07	4.94
FALSE	High	[K].DLAEDAPWK.[K]	1xTMT6plex [K9]; 1xTMT6plex [N-Term]		0.00116095	0.000108793	3	3	1	P21333; O75369; Q14315	P21333 [34-42]; O75369 [7-15]; Q14315 [27-35]	0	1502.83	0	100.5	92.1	102.3	102.5	104	99.2	Shared	Not Found	Not Found	Not Found	Not Found	Not Found	High	Not Found	Not Found	Not Found	Not Found	Not Found	High	3.165e-05	7.93e-05	2.91
FALSE	High	[R].KSTAALEEDAQILK.[V]	1xPhospho [T/S]; 2xTMT6plex [K1; K14]; 1xTMT6plex [N-Term]	Q15052 1xPhospho [S/T]; Q14155 1xPhospho [S/T]	2.74186e-10	0	2	2	2	Q15052; Q14155	Q15052 [648-661]; Q14155 [702-715]	1	2284.28	0	112.9	126.6	110	132.4	102.9	55.5	Shared	Not Found	Not Found	Not Found	Not Found	Not Found	High	Not Found	Not Found	Not Found	Not Found	Not Found	High	0	6.488e-11	7.31
FALSE	High	[K].HIAEEADR.[K]	1xTMT6plex [N-Term]		0.0448352	0.000856746	2	2	1	P67936; P06753	P67936 [117-124]; P06753 [154-161]	0	1169.61	0	110.5	101.9	105.2	73.8	98.5	135.1	Shared	Not Found	Not Found	Not Found	Not Found	Not Found	Not Found	Not Found	Not Found	Not Found	High	Not Found	High	0.0003161	0.0046	2.59
FALSE	High	[RK].EEEWDPEYTPK.[S]	1xPhospho [T9]; 1xTMT6plex [K11]; 1xTMT6plex [N-Term]	Q9Y2W1 1xPhospho [T874]; Q9NYF8 1xPhospho [T840]	0.00932599	0.000209539	2	2	4	Q9Y2W1; Q9NYF8	Q9Y2W1 [866-876]; Q9NYF8 [832-842]	0	1960.9	0	90.4	80.5	91.6	93.6	112.2	100.9	Shared	High	High	High	Not Found	Not Found	Not Found	Not Found	Not Found	Not Found	Not Found	High	High	0.0001195	0.0009136	2.75
FALSE	High	[RK].EEEWDPEYTPK.[S]	1xTMT6plex [K11]; 1xTMT6plex [N-Term]		0.00278683	0.000108793	2	2	1	Q9Y2W1; Q9NYF8	Q9Y2W1 [866-876]; Q9NYF8 [832-842]	0	1880.93	0	90.4	92.5	94.1	81	110.9	150.7	Shared	Not Found	Not Found	Not Found	Not Found	Not Found	Not Found	Not Found	Not Found	Not Found	High	Not Found	High	3.165e-05	0.0001638	2.87
FALSE	High	[R].AILVDLEPGTMDSVR.[S]	1xTMT6plex [N-Term]		6.19772e-06	0	3	4	1	Q13885; Q13509; P07437	Q13885 [63-77]; Q13509 [63-77]; P07437 [63-77]	0	1845	0	101.3	101	96.5	82.9	95.6	125.7	Shared	Not Found	Not Found	Not Found	Not Found	Not Found	Not Found	Not Found	Not Found	Not Found	High	Not Found	High	0	7.026e-07	3.59
FALSE	High	[R].AFVHWYVGEGMEEGEFSEAR.[E]	1xTMT6plex [N-Term]		2.38118e-08	0	3	6	8	P68363; Q9BQE3; P68366	P68363 [403-422]; Q9BQE3 [403-422]; P68366 [403-422]	0	2559.18	0	95	93.4	93.7	93.1	104.8	127.1	Shared	Not Found	Not Found	Not Found	Not Found	Not Found	Not Found	Not Found	Not Found	Not Found	High	Not Found	High	0	4.06e-09	5.29
FALSE	High	[R].AFVHWYVGEGMEEGEFSEAR.[E]	1xOxidation [M11]; 1xTMT6plex [N-Term]		0.0160831	0.000295797	3	6	1	P68363; Q9BQE3; P68366	P68363 [403-422]; Q9BQE3 [403-422]; P68366 [403-422]	0	2575.18	0	89.2	60.7	90.9	72	133.7	173.8	Shared	Not Found	Not Found	Not Found	Not Found	Not Found	Not Found	Not Found	Not Found	Not Found	High	Not Found	High	0.000144	0.001059	2.92
FALSE	High	[R].MSGFIYQGK.[IL]	1xPhospho [S2]; 1xOxidation [M1]; 1xTMT6plex [K9]; 1xTMT6plex [N-Term]	Q15052 1xPhospho [S488]; Q14155 1xPhospho [S518]	0.00301949	0.000108793	2	2	10	Q15052; Q14155	Q15052 [487-495]; Q14155 [517-525]	0	1584.79	0	107	107.1	103.3	106.1	101.7	78.6	Shared	Not Found	Not Found	Not Found	Not Found	Not Found	High	High	High	High	Not Found	Not Found	High	3.165e-05	0.0001761	2.89
FALSE	High	[R].QQEGESR.[L]	1xTMT6plex [N-Term]		0.0638876	0.00158026	2	2	1	P07195; P00338	P07195 [101-107]; P00338 [100-106]	0	1062.54	0	88.9	95.9	93.4	69.1	115.5	117.4	Shared	Not Found	Not Found	Not Found	Not Found	Not Found	Not Found	Not Found	Not Found	Not Found	High	Not Found	High	0.0005341	0.008092	2.54
FALSE	High	[K].EDQTEYLEER.[RW]	1xTMT6plex [N-Term]		3.06925e-06	0	2	4	4	P07900; P08238	P07900 [192-201]; P08238 [187-196]	0	1540.73	0	95.7	89.3	94	91.6	100.6	129.3	Shared	High	Not Found	Not Found	Not Found	Not Found	Not Found	Not Found	Not Found	Not Found	High	Not Found	High	0	3.67e-07	3.56
FALSE	High	[R].EDQSILCTGESGAGK.[T]	1xCarbamidomethyl [C7]; 1xTMT6plex [K15]; 1xTMT6plex [N-Term]		4.38145e-11	0	3	4	1	P35580; P35579; Q7Z406	P35580 [170-184]; P35579 [166-180]; Q7Z406 [190-204]	0	2010.02	0	102.8	95.9	100.4	100.8	105.3	89.5	Shared	Not Found	Not Found	Not Found	Not Found	Not Found	Not Found	Not Found	Not Found	Not Found	High	Not Found	High	0	1.188e-11	5.49
FALSE	High	[R].HQGVMVGMGQK.[D]	1xOxidation [M]; 1xTMT6plex [K11]; 1xTMT6plex [N-Term]		3.08905e-05	0	2	7	2	P60709; P68032	P60709 [40-50]; P68032 [42-52]	0	1645.89	0	100	100.8	105.6	117.8	97.1	89.1	Shared	Not Found	Not Found	Not Found	Not Found	Not Found	Not Found	Not Found	High	Not Found	Not Found	Not Found	High	0	3.098e-06	3.71
FALSE	High	[R].SVGDGETVEFDVVEGEK.[G]	1xTMT6plex [K17]; 1xTMT6plex [N-Term]		8.33025e-11	0	2	3	6	P16989; P67809	P16989 [134-150]; P67809 [102-118]	0	2254.15	0	99.8	99.4	98	92.3	100.4	109.3	Shared	Not Found	Not Found	Not Found	Not Found	Not Found	Not Found	Not Found	Not Found	Not Found	High	Not Found	High	0	2.419e-11	5.08
FALSE	High	[R].SVGDGETVEFDVVEGEK.[G]	1xPhospho [S1]; 1xTMT6plex [K17]; 1xTMT6plex [N-Term]	P16989 1xPhospho [S134]; P67809 1xPhospho [S102]	8.55e-08	0	2	3	3	P16989; P67809	P16989 [134-150]; P67809 [102-118]	0	2334.12	0	106	104.7	122.5	86.3	84.1	83.2	Shared	Not Found	High	High	Not Found	Not Found	Not Found	Not Found	Not Found	Not Found	Not Found	High	High	0	2.072e-08	4.84
FALSE	High	[R].HQGVMVGMGQK.[D]	2xOxidation [M5; M8]; 1xTMT6plex [K11]; 1xTMT6plex [N-Term]		3.15253e-06	0	2	7	5	P60709; P68032	P60709 [40-50]; P68032 [42-52]	0	1661.89	0	98.2	90.2	108.7	112.7	102.5	99.4	Shared	Not Found	Not Found	Not Found	Not Found	Not Found	Not Found	High	High	High	Not Found	Not Found	High	0	3.749e-07	4.19
FALSE	High	[R].DLLSDLQDISDSER.[K]	1xPhospho [S]; 1xTMT6plex [N-Term]	Q9UQ88 1xPhospho [S]; P21127 1xPhospho [S]	3.1315e-06	0	2	2	6	Q9UQ88; P21127	Q9UQ88 [262-275]; P21127 [274-287]	0	1914.89	0	115.8	83.9	101.8	77.9	103	121.3	Shared	High	High	High	Not Found	Not Found	Not Found	Not Found	Not Found	Not Found	Not Found	High	High	0	3.728e-07	4.11
FALSE	High	[K].IREEYPDR.[I]	1xTMT6plex [N-Term]		0.0849502	0.0025315	3	7	1	Q13885; P07437; P68371	Q13885 [155-162]; P07437 [155-162]; P68371 [155-162]	1	1306.7	0	74.8	80.9	85.8	84.6	107.8	176.4	Shared	Not Found	Not Found	Not Found	Not Found	Not Found	Not Found	Not Found	Not Found	Not Found	High	Not Found	High	0.0008897	0.01281	2.64
FALSE	High	[K].AGFAGDDAPR.[A]	1xTMT6plex [N-Term]		7.99016e-05	0	2	10	5	P60709; P68032	P60709 [19-28]; P68032 [21-30]	0	1205.61	0	96.2	83.4	98.6	84.9	102	146.6	Shared	Not Found	Not Found	Not Found	Not Found	High	Not Found	Not Found	Not Found	High	High	Not Found	High	0	2.875e-05	3.26
FALSE	High	[R].DLLDDLK.[S]	1xTMT6plex [K7]; 1xTMT6plex [N-Term]		0.0689641	0.00175403	2	2	2	P09525; P08758	P09525 [63-69]; P08758 [64-70]	0	1289.77	0	106.6	117.5	101.2	108.2	88	59.3	Shared	Not Found	Not Found	Not Found	Not Found	Not Found	Not Found	Not Found	Not Found	Not Found	High	Not Found	High	0.0005796	0.009164	2.51
FALSE	High	[RK].SPSLSSK.[HQ]	1xPhospho [S1]; 1xTMT6plex [K7]; 1xTMT6plex [N-Term]	Q8IYB3 1xPhospho [S653]; Q9UPU5 1xPhospho [S1141]	0.0507011	0.0010351	2	2	3	Q8IYB3; Q9UPU5	Q8IYB3 [653-659]; Q9UPU5 [1141-1147]	0	1243.67	0	114.3	98.8	112.3	83.4	100.7	82.5	Shared	Not Found	Not Found	Not Found	Not Found	High	Not Found	Not Found	High	High	Not Found	Not Found	High	0.007541	0.1163	2.28
FALSE	High	[R].KISGTTALQEALK.[E]	1xPhospho [T/S]; 2xTMT6plex [K1; K13]; 1xTMT6plex [N-Term]	P30622 1xPhospho [S/T]; Q9UDT6 1xPhospho [S/T]	1.78481e-06	0	2	2	11	P30622; Q9UDT6	P30622 [346-358]; Q9UDT6 [350-362]	1	2127.24	0	94.2	97.2	86.4	107.2	99.5	83.4	Shared	Not Found	Not Found	Not Found	Not Found	Not Found	Not Found	High	High	Not Found	Not Found	Not Found	High	0	3.627e-07	5.46
FALSE	High	[R].SGETEDTFIADLVVGLCTGQIK.[T]	1xCarbamidomethyl [C17]; 1xTMT6plex [K22]; 1xTMT6plex [N-Term]		1.33879e-07	0	2	3	1	P09104; P06733	P09104 [373-394]; P06733 [373-394]	0	2811.49	0	88.7	97.7	97.4	109.6	109.1	101	Shared	Not Found	Not Found	Not Found	Not Found	Not Found	Not Found	Not Found	Not Found	Not Found	High	Not Found	High	0	2.007e-08	5.34
FALSE	High	[K].IWHHTFYNELR.[V]	1xTMT6plex [N-Term]		0.000247584	0	2	9	39	P60709; P68032	P60709 [85-95]; P68032 [87-97]	0	1744.91	0	92	71.7	89.3	76.2	112.6	155.2	Shared	High	High	High	Not Found	Not Found	Not Found	Not Found	Not Found	Not Found	Not Found	Not Found	High	6.142e-05	0.0005437	2.43
FALSE	High	[R].LLLDIPLQTPHK.[L]	1xPhospho [T9]; 1xTMT6plex [K12]; 1xTMT6plex [N-Term]	P49792 1xPhospho [T2153]; A6NKT7 1xPhospho [T1178]	0.0540773	0.0010351	2	6	1	P49792; A6NKT7	P49792 [2145-2156]; A6NKT7 [1170-1181]	0	1926.12	0	104.7	86.6	124.5	94.6	104.5	126.3	Shared	Not Found	Not Found	Not Found	Not Found	Not Found	Not Found	Not Found	High	Not Found	Not Found	Not Found	High	0.0003628	0.006214	1.99
FALSE	High	[K].LTDEDFSPFGSGGGLFSGGK.[G]	1xPhospho [S7]; 1xTMT6plex [K20]; 1xTMT6plex [N-Term]	Q9Y4E1 1xPhospho [S352]; Q641Q2 1xPhospho [S352]	1.24407e-08	0	2	2	1	Q9Y4E1; Q641Q2	Q9Y4E1 [346-365]; Q641Q2 [346-365]	0	2513.2	0	105.5	96.7	102.1	95.1	99.2	94.2	Shared	Not Found	Not Found	Not Found	Not Found	Not Found	Not Found	High	Not Found	Not Found	Not Found	Not Found	High	0	2.224e-09	6
FALSE	High	[R].ASTIFLSK.[S]	1xPhospho [S/T]; 1xTMT6plex [K8]; 1xTMT6plex [N-Term]	Q8ND76 1xPhospho [S/T]; Q8N7R7 1xPhospho [S/T]	0.00274984	0.000108793	2	2	6	Q8ND76; Q8N7R7	Q8ND76 [65-72]; Q8N7R7 [87-94]	0	1404.79	0	138.4	93.1	121.8	85.3	130.8	99.2	Shared	Not Found	Not Found	Not Found	Not Found	Not Found	Not Found	High	High	High	Not Found	Not Found	High	3.165e-05	0.0003543	3.26
FALSE	High	[K].AAIDWFDGK.[E]	1xTMT6plex [K9]; 1xTMT6plex [N-Term]		2.13777e-05	0	2	2	2	P35637; Q92804	P35637 [349-357]; Q92804 [298-306]	0	1480.82	0	94.4	80.1	96.9	103.7	109.6	124.7	Shared	Not Found	Not Found	Not Found	Not Found	Not Found	Not Found	Not Found	High	Not Found	Not Found	Not Found	High	0	2.214e-06	2.89
FALSE	High	[K].LTMQNLNDR.[L]	1xTMT6plex [N-Term]		0.00225027	0.000108793	2	3	2	P08727; P13646	P08727 [82-90]; P13646 [106-114]	0	1333.71	0	102.1	86.9	96	92.4	104.9	124	Shared	Not Found	Not Found	Not Found	Not Found	Not Found	Not Found	Not Found	Not Found	Not Found	High	Not Found	High	3.165e-05	0.0001369	2.74
FALSE	High	[K].ATDAEADVASLNR.[R]	1xPhospho [S10]; 1xTMT6plex [N-Term]	P09493 1xPhospho [S87]; P07951 1xPhospho [S87]	0.0126645	0.000209539	2	2	1	P09493; P07951	P09493 [78-90]; P07951 [78-90]	0	1641.77	0	103.5	74.3	103.8	72.7	128.4	133.6	Shared	High	Not Found	Not Found	Not Found	Not Found	Not Found	Not Found	Not Found	Not Found	Not Found	Not Found	High	0.0001195	0.0007967	1.75
FALSE	High	[K].IGFPWSEIR.[N]	1xTMT6plex [N-Term]		2.19577e-05	0	2	3	1	P26038; P15311	P26038 [238-246]; P15311 [238-246]	0	1333.75	0	113.2	61.8	86	102.2	96.5	136.3	Shared	High	Not Found	Not Found	Not Found	Not Found	Not Found	Not Found	Not Found	Not Found	Not Found	Not Found	High	0	2.259e-06	2.98
FALSE	High	[K].VGINYQPPTVVPGGDLAK.[V]	1xTMT6plex [K18]; 1xTMT6plex [N-Term]		1.54044e-06	0	3	7	1	P68363; Q9BQE3; P68366	P68363 [353-370]; Q9BQE3 [353-370]; P68366 [353-370]	0	2283.31	0	83.7	85.5	92	125.8	98.8	106.1	Shared	Not Found	Not Found	Not Found	Not Found	Not Found	Not Found	Not Found	High	Not Found	Not Found	Not Found	High	0	1.94e-07	3.75
FALSE	High	[R].FPGQLNADLR.[K]	1xTMT6plex [N-Term]		8.31753e-05	0	5	10	1	Q13885; Q13509; Q9BUF5; P07437; P68371	Q13885 [242-251]; Q13509 [242-251]; Q9BUF5 [242-251]; P07437 [242-251]; P68371 [242-251]	0	1359.76	0	95.9	88.6	85.4	117.4	98.3	148.9	Shared	Not Found	Not Found	Not Found	Not Found	Not Found	Not Found	Not Found	High	Not Found	Not Found	Not Found	High	0	7.743e-06	2.82
FALSE	High	[K].ETVSEAPPLLFSDEEEKEAQLGVK.[S]	1xPhospho [S12]; 2xTMT6plex [K17; K24]; 1xTMT6plex [N-Term]	Q9Y4E1 1xPhospho [S728]; Q641Q2 1xPhospho [S728]	7.78334e-07	0	2	2	2	Q9Y4E1; Q641Q2	Q9Y4E1 [717-740]; Q641Q2 [717-740]	1	3412.77	0	100	118.2	103	105	86.4	79.1	Shared	Not Found	Not Found	Not Found	Not Found	High	High	Not Found	Not Found	Not Found	Not Found	Not Found	High	0	1.029e-07	5.91
FALSE	High	[K].NTNDANSCQIIIPQNQVNR.[K]	1xCarbamidomethyl [C8]; 1xTMT6plex [N-Term]		1.01097e-08	0	2	2	1	P31150; P50395	P31150 [310-328]; P50395 [310-328]	0	2428.22	0	106.3	103.4	96	94.2	93.2	96.1	Shared	Not Found	Not Found	Not Found	Not Found	Not Found	Not Found	Not Found	Not Found	Not Found	High	Not Found	High	0	1.84e-09	5.47
FALSE	High	[K].FGANAILGVSLAVCK.[A]	1xCarbamidomethyl [C14]; 1xTMT6plex [K15]; 1xTMT6plex [N-Term]		2.61573e-09	0	2	3	3	P09104; P06733	P09104 [106-120]; P06733 [106-120]	0	1978.16	0	101.3	73.7	104.5	96.8	81.8	115.7	Shared	High	High	Not Found	Not Found	Not Found	Not Found	Not Found	Not Found	Not Found	Not Found	Not Found	High	0	5.241e-10	4.25
FALSE	High	[R].LKLSPSPSSR.[V]	1xPhospho [S4]; 1xTMT6plex [K2]; 1xTMT6plex [N-Term]	P20700 1xPhospho [S391]; Q03252 1xPhospho [S405]	0.0451269	0.000856746	2	2	2	P20700; Q03252	P20700 [388-397]; Q03252 [402-411]	1	1609.91	0	102.7	93.4	117	96.5	100	90.7	Shared	Not Found	Not Found	Not Found	Not Found	Not Found	Not Found	Not Found	High	Not Found	Not Found	Not Found	High	0.008244	0.1276	2.58
FALSE	High	[K].GAGTGGLGLTVEGPCEAK.[I]	1xCarbamidomethyl [C15]; 1xTMT6plex [K18]; 1xTMT6plex [N-Term]		5.79793e-07	0	2	2	1	O75369; Q14315	O75369 [1067-1084]; Q14315 [1089-1106]	0	2132.14	0	97.5	95.7	91.8	89.4	96.6	131.1	Shared	Not Found	Not Found	Not Found	Not Found	Not Found	Not Found	Not Found	Not Found	Not Found	High	Not Found	High	0	7.805e-08	4.5
FALSE	High	[K].EVDEQMLAIQSK.[N]	1xTMT6plex [K12]; 1xTMT6plex [N-Term]		8.71909e-06	0	2	2	1	Q13509; Q9BUF5	Q13509 [325-336]; Q9BUF5 [325-336]	0	1849.01	0	95.4	89.8	87.4	85.8	103.4	126.8	Shared	Not Found	Not Found	Not Found	Not Found	Not Found	Not Found	Not Found	Not Found	Not Found	High	Not Found	High	0	9.653e-07	4.06
FALSE	High	[K].EVDEQMLAIQSK.[N]	1xOxidation [M6]; 1xTMT6plex [K12]; 1xTMT6plex [N-Term]		0.000582974	0	2	2	1	Q13509; Q9BUF5	Q13509 [325-336]; Q9BUF5 [325-336]	0	1865.01	0	94.2	97.1	92.8	91.7	101.7	115.3	Shared	Not Found	Not Found	Not Found	Not Found	Not Found	Not Found	Not Found	Not Found	Not Found	High	Not Found	High	0	4.455e-05	3.48
FALSE	High	[RK].VEIIANDQGNR.[TI]	1xTMT6plex [N-Term]		1.43111e-06	0	3	7	22	P11142; P11021; P0DMV9	P11142 [26-36]; P11021 [50-60]; P0DMV9 [26-36]	0	1457.79	0	99	90.6	97.4	87.9	104.6	125.2	Shared	Not Found	Not Found	Not Found	Not Found	Not Found	Not Found	Not Found	Not Found	Not Found	High	Not Found	High	0	5.713e-07	3.77
FALSE	High	[K].EVDEQMLNVQNK.[N]	1xTMT6plex [K12]; 1xTMT6plex [N-Term]		8.21144e-07	0	3	4	7	Q13885; P07437; P68371	Q13885 [325-336]; P07437 [325-336]; P68371 [325-336]	0	1905.02	0	85.3	94.4	89.5	100	102	111.6	Shared	Not Found	Not Found	Not Found	Not Found	Not Found	High	Not Found	Not Found	Not Found	High	Not Found	High	0	4.419e-07	4.66
FALSE	High	[R].FLEQQNK.[VLAIM]	1xTMT6plex [K7]; 1xTMT6plex [N-Term]		0.0225392	0.000295797	4	18	2	P08729; P08670; P02538; P05787	P08729 [111-117]; P08670 [123-129]; P02538 [183-189]; P05787 [111-117]	0	1364.79	0	102.2	91.1	99.4	117.8	96.9	102.1	Shared	Not Found	Not Found	Not Found	Not Found	Not Found	Not Found	Not Found	High	Not Found	High	Not Found	High	0.0001658	0.00164	2.23
FALSE	High	[K].LVILEGELER.[AS]	1xTMT6plex [N-Term]		1.0446e-05	0	2	2	1	P67936; P07951	P67936 [133-142]; P07951 [169-178]	0	1399.84	0	111.4	97.1	90.9	75.2	95.4	166.4	Shared	Not Found	Not Found	Not Found	Not Found	Not Found	Not Found	Not Found	Not Found	Not Found	High	Not Found	High	0	1.137e-06	3.4
FALSE	High	[K].IIAPPER.[K]	1xTMT6plex [N-Term]		0.143178	0.00498335	2	7	2	P60709; P68032	P60709 [329-335]; P68032 [331-337]	0	1024.64	0	93.3	89.1	89.2	98	107.2	144.1	Shared	Not Found	Not Found	Not Found	Not Found	Not Found	Not Found	High	Not Found	Not Found	Not Found	Not Found	High	0.004773	0.07238	2.06
FALSE	High	[K].EVDEQMLNVQNK.[N]	1xOxidation [M6]; 1xTMT6plex [K12]; 1xTMT6plex [N-Term]		9.90142e-06	0	3	4	6	Q13885; P07437; P68371	Q13885 [325-336]; P07437 [325-336]; P68371 [325-336]	0	1921.01	0	90.2	88.7	98.3	96.8	102.5	107.4	Shared	Not Found	Not Found	Not Found	Not Found	Not Found	Not Found	Not Found	Not Found	Not Found	High	Not Found	High	0	1.084e-06	4.22
FALSE	High	[K].NSSYFVEWIPNNVK.[TV]	1xTMT6plex [K14]; 1xTMT6plex [N-Term]		0.000382478	0	5	7	1	Q13885; Q13509; Q9BUF5; P07437; P68371	Q13885 [337-350]; Q13509 [337-350]; Q9BUF5 [337-350]; P07437 [337-350]; P68371 [337-350]	0	2155.16	0	98	107.6	91.1	105	98.2	85.8	Shared	Not Found	Not Found	Not Found	Not Found	Not Found	Not Found	Not Found	Not Found	Not Found	High	Not Found	High	0	3.089e-05	3.72
FALSE	High	[R].VGWEQLLTTIAR.[T]	1xTMT6plex [N-Term]		6.75916e-05	0	2	2	1	P12814; O43707	P12814 [715-726]; O43707 [734-745]	0	1615.94	0	105.6	66.5	109.5	87.1	89.4	155.6	Shared	High	Not Found	Not Found	Not Found	Not Found	Not Found	Not Found	Not Found	Not Found	Not Found	Not Found	High	0	6.394e-06	2.84
FALSE	High	[KR].IVNDDQSFYADIYMEDGLIK.[Q]	1xTMT6plex [K20]; 1xTMT6plex [N-Term]		1.16296e-06	0	2	2	1	Q16555; Q14195	Q16555 [24-43]; Q14195 [24-43]	0	2807.42	0	96.7	90.6	78	94.9	122	114.6	Shared	Not Found	Not Found	Not Found	Not Found	Not Found	Not Found	Not Found	Not Found	Not Found	High	Not Found	High	0	1.495e-07	4.35
FALSE	High	[R].IINEPTAAAIAYGLDK.[KRG]	1xTMT6plex [K16]; 1xTMT6plex [N-Term]		4.37824e-08	0	2	4	1	P11142; P11021	P11142 [172-187]; P11021 [198-213]	0	2118.22	0	107.1	77.6	107.5	100.5	105.8	96.9	Shared	Not Found	Not Found	Not Found	Not Found	Not Found	Not Found	Not Found	High	Not Found	Not Found	Not Found	High	0	7.16e-09	4.93
FALSE	High	[K].FYEEVHDLER.[K]	1xTMT6plex [N-Term]		0.20331	0.00868388	2	2	1	P55209; Q99733	P55209 [95-104]; Q99733 [84-93]	0	1565.78	0	95.2	104.2	89.2	97.9	103.3	118.2	Shared	Not Found	Not Found	Not Found	Not Found	Not Found	Not Found	Not Found	Not Found	Not Found	High	Not Found	High	0.003368	0.04981	1.7
FALSE	High	[K].ATDAEADVASLNR.[R]	1xTMT6plex [N-Term]		3.72571e-05	0	2	2	2	P09493; P07951	P09493 [78-90]; P07951 [78-90]	0	1561.8	0	85.9	100.2	81.6	88.9	96.4	170	Shared	Not Found	Not Found	Not Found	Not Found	Not Found	Not Found	Not Found	Not Found	Not Found	High	Not Found	High	0	3.694e-06	3.58
FALSE	High	[R].ESTGAQVQVAGDMLPNSTER.[A]	1xTMT6plex [N-Term]		1.6813e-08	0	2	3	1	Q15366; Q15365	Q15366 [125-144]; Q15365 [125-144]	0	2319.14	0	92.2	97.4	101.3	86.4	100.6	133.1	Shared	Not Found	Not Found	Not Found	Not Found	Not Found	Not Found	Not Found	Not Found	Not Found	High	Not Found	High	0	2.946e-09	4.73
FALSE	High	[KR].LLEGEESR.[LI]	1xTMT6plex [N-Term]		0.00245453	0.000108793	3	6	8	P08729; P08670; P05787	P08729 [395-402]; P08670 [403-410]; P05787 [394-401]	0	1161.63	1	99.7	91.5	95.3	83.9	106.5	134.8	Shared	Not Found	High	High	High	Not Found	Not Found	Not Found	Not Found	Not Found	High	Not Found	High	3.165e-05	0.0001493	2.92
FALSE	High	[K].GHYTEGAELVDSVLDVVR.[K]	1xTMT6plex [N-Term]		1.29536e-09	0	4	5	2	Q13885; Q13509; P07437; P68371	Q13885 [104-121]; Q13509 [104-121]; P07437 [104-121]; P68371 [104-121]	0	2188.14	0	99.3	96.3	98.4	101.9	100.5	103.9	Shared	Not Found	Not Found	Not Found	Not Found	Not Found	Not Found	Not Found	Not Found	Not Found	High	Not Found	High	0	2.742e-10	6.24
FALSE	High	[K].AVASPEATVSQTDENK.[A]	1xPhospho [S4]; 1xTMT6plex [K16]; 1xTMT6plex [N-Term]	Q9Y4E1 1xPhospho [S498]; Q641Q2 1xPhospho [S498]	0.000189442	0	2	2	2	Q9Y4E1; Q641Q2	Q9Y4E1 [495-510]; Q641Q2 [495-510]	0	2185.08	0	91.7	98.4	112.3	83.1	114	108.8	Shared	Not Found	High	High	Not Found	Not Found	Not Found	Not Found	Not Found	Not Found	Not Found	Not Found	High	0	1.643e-05	3.62
FALSE	High	[R].GHYTIGK.[E]	1xTMT6plex [K7]; 1xTMT6plex [N-Term]		0.041744	0.000856746	3	6	1	P68363; Q9BQE3; P68366	P68363 [106-112]; Q9BQE3 [106-112]; P68366 [106-112]	0	1233.74	0	91.7	71.7	90.6	73.5	94.5	183.5	Shared	Not Found	Not Found	Not Found	Not Found	Not Found	Not Found	Not Found	High	Not Found	Not Found	Not Found	High	0.0003161	0.004112	1.91
FALSE	High	[R].GEADLFDSGDIFSTGTGSQSVER.[T]	1xTMT6plex [N-Term]		1.35716e-08	0	2	2	1	Q9Y4E1; Q641Q2	Q9Y4E1 [1104-1126]; Q641Q2 [1125-1147]	0	2604.23	0	94.1	90.2	89.6	95.4	102.2	134.4	Shared	Not Found	Not Found	Not Found	Not Found	Not Found	Not Found	Not Found	Not Found	Not Found	High	Not Found	High	0	2.407e-09	4.23
FALSE	High	[R].LHFFMPGFAPLTSR.[G]	1xTMT6plex [N-Term]		8.6053e-07	0	4	8	2	Q13885; Q9BUF5; P07437; P68371	Q13885 [263-276]; Q9BUF5 [263-276]; P07437 [263-276]; P68371 [263-276]	0	1850	0	96.7	56.9	96.4	81.6	106.4	165	Shared	High	High	Not Found	Not Found	Not Found	Not Found	Not Found	Not Found	Not Found	Not Found	Not Found	High	0	1.127e-07	4.41
FALSE	High	[K].LLEGEEER.[L]	1xTMT6plex [N-Term]		0.0181206	0.000295797	3	3	3	P20700; P02545; Q03252	P20700 [380-387]; P02545 [379-386]; Q03252 [394-401]	0	1203.64	0	107.3	78.7	96.9	80.2	113.4	135.9	Shared	High	Not Found	Not Found	Not Found	Not Found	Not Found	Not Found	Not Found	Not Found	High	High	High	0.0001658	0.002355	2.71
FALSE	High	[R].FAIQDISVEETSAK.[E]	1xPhospho [S7]; 1xTMT6plex [K14]; 1xTMT6plex [N-Term]	P12814 1xPhospho [S140]; O43707 1xPhospho [S159]	0.000198527	0	2	4	2	P12814; O43707	P12814 [134-147]; O43707 [153-166]	0	2076.07	0	108.2	98.2	114.9	99.6	106.5	96	Shared	Not Found	Not Found	Not Found	Not Found	High	High	Not Found	Not Found	Not Found	Not Found	Not Found	High	0	1.716e-05	3.88
FALSE	High	[K].ASALLFSSDEEDQWNIPASQTHLASDSR.[S]	1xPhospho [S]; 1xTMT6plex [N-Term]	Q9Y4E1 1xPhospho [S]; Q641Q2 1xPhospho [S]	3.53502e-09	0	2	2	3	Q9Y4E1; Q641Q2	Q9Y4E1 [613-640]; Q641Q2 [613-640]	0	3384.56	0	92	85.1	91.1	108.8	103.9	113.2	Shared	Not Found	Not Found	Not Found	Not Found	High	High	Not Found	Not Found	Not Found	Not Found	Not Found	High	0	6.91e-10	5.63
FALSE	High	[R].AAVPSGASTGIYEALELR.[D]	1xPhospho [S8]; 1xTMT6plex [N-Term]	P09104 1xPhospho [S40]; P06733 1xPhospho [S40]	2.21052e-05	0	2	3	1	P09104; P06733	P09104 [33-50]; P06733 [33-50]	0	2114.07	0	96.1	98.8	89.9	94.6	102.3	117.5	Shared	Not Found	Not Found	Not Found	Not Found	High	Not Found	Not Found	Not Found	Not Found	Not Found	Not Found	High	0	2.277e-06	4.43
FALSE	High	[R].AAVPSGASTGIYEALELR.[D]	1xTMT6plex [N-Term]		2.30225e-07	0	2	3	2	P09104; P06733	P09104 [33-50]; P06733 [33-50]	0	2034.11	0	83.4	92.9	91.9	99.1	106	128.1	Shared	Not Found	Not Found	Not Found	Not Found	Not Found	Not Found	High	Not Found	Not Found	High	Not Found	High	0	3.33e-08	4.95
FALSE	High	[R].FAIQDISVEETSAK.[E]	1xTMT6plex [K14]; 1xTMT6plex [N-Term]		2.94844e-06	0	2	4	1	P12814; O43707	P12814 [134-147]; O43707 [153-166]	0	1996.1	0	95.5	93	101.9	104.2	109.1	100.9	Shared	Not Found	Not Found	Not Found	Not Found	Not Found	Not Found	Not Found	Not Found	Not Found	High	Not Found	High	0	3.521e-07	4.05
FALSE	High	[K].ASPEPEGEAAGK.[M]	1xPhospho [S2]; 1xTMT6plex [K12]; 1xTMT6plex [N-Term]	Q8IU81 1xPhospho [S384]	0.0659584	0.00175403	1	1	1	Q8IU81	Q8IU81 [383-394]	0	1680.82	0							No Quan Values	Not Found	Not Found	Not Found	Not Found	Not Found	Not Found	Not Found	Not Found	Not Found	Not Found	High	High	0.0005796	0.0085	2.73
FALSE	High	[R].NTDEMVELR.[I]	1xTMT6plex [N-Term]		0.0226884	0.000295797	1	1	1	P61978	P61978 [38-46]	0	1335.68	0							No Quan Values	Not Found	Not Found	Not Found	Not Found	Not Found	Not Found	Not Found	Not Found	Not Found	High	Not Found	High	0.0001658	0.001653	2.9
FALSE	High	[K].DHQEVETEGPESADTGDKSESPDEANVGK.[H]	1xPhospho [S/T]; 2xTMT6plex [K18; K29]; 1xTMT6plex [N-Term]	Q8NFQ8 1xPhospho [S/T]	5.42124e-06	0	1	1	4	Q8NFQ8	Q8NFQ8 [52-80]	1	3824.76	0							No Quan Values	Not Found	Not Found	High	Not Found	Not Found	Not Found	Not Found	Not Found	Not Found	Not Found	Not Found	High	0	6.189e-07	4.39
FALSE	High	[R].KSPLGGGGGSGASSQAACLK.[Q]	1xCarbamidomethyl [C18]; 1xPhospho [S2]; 2xTMT6plex [K1; K20]; 1xTMT6plex [N-Term]	Q68DK7 1xPhospho [S205]	0.0720987	0.00184012	1	1	1	Q68DK7	Q68DK7 [204-223]	1	2557.34	0							No Quan Values	Not Found	Not Found	Not Found	Not Found	Not Found	Not Found	Not Found	High	Not Found	Not Found	Not Found	High	0.0006522	0.009883	2.35
FALSE	High	[R].QQSHFAMMHGGTGFAGIDSSSPEVK.[G]	1xPhospho [S19]; 1xOxidation [M]; 1xTMT6plex [K25]; 1xTMT6plex [N-Term]	Q15365 1xPhospho [S262]	0.015252	0.000295797	1	1	2	Q15365	Q15365 [244-268]	0	3160.46	0							No Quan Values	Not Found	Not Found	Not Found	Not Found	Not Found	High	Not Found	Not Found	Not Found	Not Found	Not Found	High	0.000144	0.000995	3.41
FALSE	High	[R].KSPSSDSWTCADTSTER.[R]	1xCarbamidomethyl [C10]; 1xPhospho [S]; 1xTMT6plex [K1]; 1xTMT6plex [N-Term]	Q8N6T3 1xPhospho [S]	0.00977092	0.000209539	1	1	3	Q8N6T3	Q8N6T3 [342-358]	1	2453.11	0							No Quan Values	Not Found	Not Found	Not Found	Not Found	High	Not Found	Not Found	Not Found	Not Found	Not Found	Not Found	High	0.0001195	0.0007716	3.26
FALSE	High	[R].TNPEDIYPSNPTDDDVSSGSSSER.[S]	1xPhospho [S]; 1xTMT6plex [N-Term]	P16070 1xPhospho [S]	1.16267e-05	0	1	1	3	P16070	P16070 [163-186]	0	2878.21	0							No Quan Values	Not Found	Not Found	Not Found	Not Found	Not Found	Not Found	Not Found	Not Found	Not Found	Not Found	High	High	0	1.26e-06	4.64
FALSE	High	[R].TPSADLFHYDSMNAVNWGMR.[E]	1xPhospho [S3]; 1xOxidation [M12]; 1xTMT6plex [N-Term]	O94929 1xPhospho [S599]	0.00235805	0.000108793	1	1	1	O94929	O94929 [597-616]	0	2637.15	0							No Quan Values	Not Found	Not Found	Not Found	Not Found	Not Found	High	Not Found	Not Found	Not Found	Not Found	Not Found	High	3.165e-05	0.0001419	3.34
FALSE	High	[R].KSPGDEDDKDCKEEENK.[S]	1xCarbamidomethyl [C11]; 1xPhospho [S2]; 4xTMT6plex [K1; K9; K12; K17]; 1xTMT6plex [N-Term]	Q9Y3E1 1xPhospho [S162]	0.0904389	0.0025315	1	1	1	Q9Y3E1	Q9Y3E1 [161-177]	3	3248.64	0							No Quan Values	Not Found	Not Found	Not Found	Not Found	Not Found	High	Not Found	Not Found	Not Found	Not Found	Not Found	High	0.0009331	0.01413	3.48
FALSE	High	[K].DLPPDTTLLDLQNNK.[I]	1xTMT6plex [K15]; 1xTMT6plex [N-Term]		0.0569318	0.00130733	1	1	1	P07585	P07585 [78-92]	0	2155.2	0							No Quan Values	Not Found	Not Found	Not Found	Not Found	Not Found	Not Found	Not Found	Not Found	Not Found	High	Not Found	High	0.0004359	0.00674	2.86
FALSE	High	[K].VFVGGLSPDTSEEQIK.[E]	1xTMT6plex [K16]; 1xTMT6plex [N-Term]		0.00421678	0.000108793	1	1	1	O14979	O14979 [235-250]	0	2164.19	0							No Quan Values	Not Found	Not Found	Not Found	Not Found	Not Found	Not Found	Not Found	Not Found	Not Found	High	Not Found	High	3.165e-05	0.0002412	2.59
FALSE	High	[K].DLQAICGISCDELSSMVLELR.[G]	2xCarbamidomethyl [C6; C10]; 1xTMT6plex [N-Term]		6.80652e-06	0	1	1	1	P07996	P07996 [265-285]	0	2638.31	0							No Quan Values	Not Found	Not Found	Not Found	Not Found	Not Found	Not Found	Not Found	Not Found	Not Found	High	Not Found	High	0	7.653e-07	4.33
FALSE	High	[R].QNLWFANPGGSNSMPSR.[T]	1xPhospho [S]; 1xOxidation [M14]; 1xTMT6plex [N-Term]	Q9UPU9 1xPhospho [S]	0.0293306	0.000295797	1	1	3	Q9UPU9	Q9UPU9 [639-655]	0	2187.98	0							No Quan Values	Not Found	Not Found	Not Found	Not Found	Not Found	Not Found	Not Found	High	Not Found	Not Found	Not Found	High	0.0001658	0.002375	2.4
FALSE	High	[R].TPSSEEISPTKFPGLYR.[T]	1xPhospho [S]; 1xTMT6plex [K11]; 1xTMT6plex [N-Term]	Q15311 1xPhospho [S]	0.0138987	0.000209539	1	1	2	Q15311	Q15311 [27-43]	1	2447.26	0							No Quan Values	Not Found	Not Found	Not Found	Not Found	Not Found	Not Found	High	Not Found	Not Found	Not Found	Not Found	High	0.0001195	0.0008905	3.27
FALSE	High	[K].QPLFVPTTSGPSTPPGLVLPHTEFQPAPK.[Q]	1xPhospho [S/T]; 1xTMT6plex [K29]; 1xTMT6plex [N-Term]	Q96T58 1xPhospho [T/S]	2.68472e-06	0	1	1	2	Q96T58	Q96T58 [3455-3483]	0	3578.91	0							No Quan Values	Not Found	Not Found	Not Found	Not Found	Not Found	Not Found	Not Found	High	Not Found	Not Found	Not Found	High	0	3.244e-07	4.33
FALSE	High	[K].ASSEAPEELIVEAEVVDAEESPSATVVVIK.[E]	1xTMT6plex [K30]; 1xTMT6plex [N-Term]		0.0197488	0.000295797	1	1	1	Q8TDB4	Q8TDB4 [105-134]	0	3555.89	0							No Quan Values	Not Found	Not Found	Not Found	Not Found	Not Found	Not Found	Not Found	Not Found	Not Found	High	Not Found	High	0.000144	0.001376	4.25
FALSE	High	[R].VGLQSPSVEAWEAK.[G]	1xPhospho [S]; 1xTMT6plex [K14]; 1xTMT6plex [N-Term]	Q8IWT3 1xPhospho [S]	0.002063	0.000108793	1	1	2	Q8IWT3	Q8IWT3 [2432-2445]	0	2039.06	0							No Quan Values	Not Found	Not Found	Not Found	Not Found	Not Found	High	Not Found	Not Found	Not Found	Not Found	Not Found	High	3.165e-05	0.0001311	3.41
FALSE	High	[K].DLEAQIEAANK.[A]	1xTMT6plex [K11]; 1xTMT6plex [N-Term]		0.000648829	0	1	1	1	P35580	P35580 [1628-1638]	0	1659.93	0							No Quan Values	Not Found	Not Found	Not Found	Not Found	Not Found	Not Found	Not Found	Not Found	Not Found	High	Not Found	High	0	4.894e-05	2.93
FALSE	High	[K].VGEAGLLSVDCSEAGPGALGLEAVSDSGTK.[A]	1xCarbamidomethyl [C11]; 1xTMT6plex [K30]; 1xTMT6plex [N-Term]		7.7791e-05	0	1	1	1	O75369	O75369 [1148-1177]	0	3304.7	0							No Quan Values	Not Found	Not Found	Not Found	Not Found	Not Found	Not Found	Not Found	Not Found	Not Found	High	Not Found	High	0	7.255e-06	3.94
FALSE	High	[K].NVLFSHLDDNER.[S]	1xTMT6plex [N-Term]		0.0151512	0.000295797	1	1	1	P10644	P10644 [135-146]	0	1687.86	0							No Quan Values	Not Found	Not Found	Not Found	Not Found	Not Found	Not Found	Not Found	Not Found	Not Found	High	Not Found	High	0.000144	0.0009863	2.54
FALSE	High	[R].ASSHSSQTQGGGSVTK.[K]	1xTMT6plex [K16]; 1xTMT6plex [N-Term]		0.00550742	0.000108793	1	1	2	P02545	P02545 [402-417]	0	1977.04	0							No Quan Values	Not Found	Not Found	Not Found	Not Found	Not Found	High	High	Not Found	Not Found	Not Found	Not Found	High	3.165e-05	0.0003143	2.46
FALSE	High	[R].DLDAPDDVDFF.[-]	1xTMT6plex [N-Term]		0.00265948	0.000108793	1	1	1	Q9BXP5	Q9BXP5 [866-876]	0	1497.69	0							No Quan Values	Not Found	Not Found	Not Found	Not Found	Not Found	Not Found	Not Found	Not Found	Not Found	High	Not Found	High	3.165e-05	0.000158	2.84
FALSE	High	[K].KSSSLESLQTAVAEVR.[K]	1xPhospho [S4]; 1xTMT6plex [K1]; 1xTMT6plex [N-Term]	Q8TEW8 1xPhospho [S746]	3.15253e-06	0	1	1	1	Q8TEW8	Q8TEW8 [743-758]	1	2243.2	0							No Quan Values	Not Found	Not Found	Not Found	Not Found	Not Found	High	Not Found	Not Found	Not Found	Not Found	Not Found	High	0	3.754e-07	5.39
FALSE	High	[R].KSSMCSAPSSSSSAK.[G]	1xCarbamidomethyl [C5]; 1xPhospho [S]; 1xOxidation [M4]; 2xTMT6plex [K1; K15]; 1xTMT6plex [N-Term]	Q765P7 1xPhospho [S]	0.000341357	0	1	1	2	Q765P7	Q765P7 [272-286]	1	2285.11	0							No Quan Values	Not Found	Not Found	Not Found	Not Found	Not Found	Not Found	High	Not Found	Not Found	Not Found	Not Found	High	0	2.782e-05	3
FALSE	High	[K].ASQSRPNSSALETLGGEK.[L]	2xPhospho [S8; S]; 1xTMT6plex [K18]; 1xTMT6plex [N-Term]	O94804 2xPhospho [S454; S]	0.00180485	0.000108793	1	1	2	O94804	O94804 [447-464]	0	2450.17	0							No Quan Values	Not Found	Not Found	High	Not Found	Not Found	Not Found	Not Found	Not Found	Not Found	Not Found	Not Found	High	3.165e-05	0.0001544	2.89
FALSE	High	[R].DLFEDELVPLFEK.[A]	1xTMT6plex [K13]; 1xTMT6plex [N-Term]		0.000264718	0	1	1	1	O60506	O60506 [172-184]	0	2052.13	0							No Quan Values	Not Found	Not Found	Not Found	Not Found	Not Found	Not Found	Not Found	Not Found	Not Found	High	Not Found	High	0	2.222e-05	3.44
FALSE	High	[K].QQGPSSPQR.[A]	1xPhospho [S]; 1xTMT6plex [N-Term]	O60336 1xPhospho [S]	0.144037	0.00498335	1	1	2	O60336	O60336 [756-764]	0	1293.62	0							No Quan Values	Not Found	High	Not Found	Not Found	Not Found	Not Found	Not Found	Not Found	Not Found	Not Found	Not Found	High	0.001872	0.03034	1.57
FALSE	High	[R].QQLVELVAEQADLEQTFNPSDPDCVDR.[L]	1xCarbamidomethyl [C24]; 1xTMT6plex [N-Term]		4.80949e-09	0	1	1	1	Q9BZZ5	Q9BZZ5 [211-237]	0	3345.61	0							No Quan Values	Not Found	Not Found	Not Found	Not Found	Not Found	Not Found	Not Found	Not Found	Not Found	High	Not Found	High	0	9.244e-10	5.52
FALSE	High	[K].QQMAEEMVEAAGEDER.[E]	1xTMT6plex [N-Term]		5.03771e-07	0	1	1	1	Q15393	Q15393 [817-832]	0	2051.92	0							No Quan Values	Not Found	Not Found	Not Found	Not Found	Not Found	Not Found	Not Found	Not Found	Not Found	High	Not Found	High	0	6.88e-08	4.71
FALSE	High	[R].VGGSSVDLHR.[F]	1xPhospho [S]; 1xTMT6plex [N-Term]	O60716 1xPhospho [S]	0.00964169	0.000209539	1	1	2	O60716	O60716 [265-274]	0	1335.66	0							No Quan Values	Not Found	Not Found	Not Found	High	Not Found	Not Found	Not Found	Not Found	Not Found	Not Found	Not Found	High	0.0001195	0.0007756	3.14
FALSE	High	[K].DLLHSEGSENEGPVSSSSSDCR.[E]	1xCarbamidomethyl [C21]; 1xPhospho [S8]; 1xTMT6plex [N-Term]	Q9NY27 1xPhospho [S364]	0.00655065	0.000108793	1	1	1	Q9NY27	Q9NY27 [357-378]	0	2658.12	0							No Quan Values	High	Not Found	Not Found	Not Found	Not Found	Not Found	Not Found	Not Found	Not Found	Not Found	Not Found	High	3.165e-05	0.0003782	1.93
FALSE	High	[K].TNSNDDNIR.[A]	1xTMT6plex [N-Term]		0.0216636	0.000295797	0	1	1			0	1277.63	0							No Quan Values	Not Found	Not Found	Not Found	Not Found	Not Found	Not Found	Not Found	Not Found	Not Found	High	Not Found	High	0.0001658	0.001553	2.33
FALSE	High	[K].NVAEALGHSPK.[D]	1xPhospho [S9]; 1xTMT6plex [K11]; 1xTMT6plex [N-Term]	Q8IU81 1xPhospho [S436]	0.000350616	0	1	1	1	Q8IU81	Q8IU81 [428-438]	0	1660.88	0							No Quan Values	Not Found	Not Found	Not Found	Not Found	Not Found	High	Not Found	Not Found	Not Found	Not Found	Not Found	High	0	2.853e-05	3.43
FALSE	High	[K].VGLPARPKSPLDPK.[K]	1xPhospho [S9]; 2xTMT6plex [K8; K14]; 1xTMT6plex [N-Term]	Q8IYH5 1xPhospho [S606]	0.164117	0.00589781	1	1	1	Q8IYH5	Q8IYH5 [598-611]	1	2242.33	0							No Quan Values	Not Found	Not Found	Not Found	Not Found	Not Found	Not Found	Not Found	High	Not Found	Not Found	Not Found	High	0.002245	0.03675	2.12
FALSE	High	[R].TPGVLLPGAGGAAGFGMTSPPPPTSPSR.[T]	1xPhospho [S/T]; 1xOxidation [M17]; 1xTMT6plex [N-Term]	Q96L91 1xPhospho [T/S]	0.000319264	0	1	2	2	Q96L91	Q96L91 [297-324]	0	2902.44	0							No Quan Values	Not Found	Not Found	Not Found	Not Found	Not Found	Not Found	Not Found	Not Found	High	Not Found	Not Found	High	0	2.623e-05	3.79
FALSE	High	[K].DKDVTLSPVK.[A]	1xPhospho [S7]; 2xTMT6plex [K2; K10]; 1xTMT6plex [N-Term]	Q8NFC6 1xPhospho [S1531]	0.00140936	0.000108793	1	1	1	Q8NFC6	Q8NFC6 [1525-1534]	1	1869.07	0							No Quan Values	Not Found	Not Found	Not Found	Not Found	Not Found	High	Not Found	Not Found	Not Found	Not Found	Not Found	High	3.165e-05	9.282e-05	3.59
FALSE	High	[K].DILLCDPIPLDTEVTALSEDEYFSAGVVK.[G]	1xCarbamidomethyl [C5]; 1xPhospho [S/Y]; 1xTMT6plex [K29]; 1xTMT6plex [N-Term]	Q12888 1xPhospho [S/Y]	0.000292666	0	1	1	2	Q12888	Q12888 [1531-1559]	0	3747.87	0							No Quan Values	Not Found	Not Found	Not Found	Not Found	Not Found	High	Not Found	Not Found	Not Found	Not Found	Not Found	High	0	2.432e-05	3.31
FALSE	High	[R].QPPGPVPTPPLPSER.[A]	1xPhospho [T8]; 1xTMT6plex [N-Term]	Q9Y2X7 1xPhospho [T480]	0.0854848	0.0025315	1	1	1	Q9Y2X7	Q9Y2X7 [473-487]	0	1877.97	0							No Quan Values	Not Found	Not Found	Not Found	Not Found	High	Not Found	Not Found	Not Found	Not Found	Not Found	Not Found	High	0.0009113	0.01294	2.92
FALSE	High	[R].VDQDDDQDSSSLK.[L]	1xTMT6plex [K13]; 1xTMT6plex [N-Term]		0.00308062	0.000108793	1	1	1	Q8ND24	Q8ND24 [186-198]	0	1909.94	0							No Quan Values	Not Found	Not Found	Not Found	Not Found	Not Found	Not Found	Not Found	Not Found	Not Found	High	Not Found	High	3.165e-05	0.0001802	2.67
FALSE	High	[K].TMFAQVESDDEEAKNEPEWK.[K]	1xPhospho [S8]; 2xTMT6plex [K14; K20]; 1xTMT6plex [N-Term]	Q9NW82 1xPhospho [S638]	1.45039e-06	0	1	1	1	Q9NW82	Q9NW82 [631-650]	1	3150.49	0							No Quan Values	Not Found	Not Found	Not Found	Not Found	Not Found	High	Not Found	Not Found	Not Found	Not Found	Not Found	High	0	1.829e-07	5.51
FALSE	High	[K].TNDASSESIASFSK.[Q]	1xPhospho [S]; 1xTMT6plex [K14]; 1xTMT6plex [N-Term]	Q7RTN6 1xPhospho [S]	0.00532668	0.000108793	1	1	2	Q7RTN6	Q7RTN6 [42-55]	0	1981.95	0							No Quan Values	Not Found	Not Found	Not Found	Not Found	High	Not Found	Not Found	Not Found	Not Found	Not Found	Not Found	High	3.165e-05	0.000304	3.52
FALSE	High	[R].DNSSFDKDDNQMR.[I]	1xPhospho [S4]; 1xTMT6plex [K7]; 1xTMT6plex [N-Term]	Q15032 1xPhospho [S262]	0.205635	0.00868388	1	1	1	Q15032	Q15032 [259-271]	1	2109.93	0							No Quan Values	Not Found	Not Found	High	Not Found	Not Found	Not Found	Not Found	Not Found	Not Found	Not Found	Not Found	High	0.003368	0.05064	3.03
FALSE	High	[K].DNWEELYNR.[Y]	1xTMT6plex [N-Term]		0.000717304	0	1	1	1	P55786	P55786 [833-841]	0	1467.71	0							No Quan Values	Not Found	Not Found	Not Found	Not Found	Not Found	Not Found	Not Found	Not Found	Not Found	High	Not Found	High	0	5.331e-05	2.89
FALSE	High	[K].KPLTSSSAAPQRPISTQR.[T]	1xPhospho [S5]; 1xTMT6plex [K1]; 1xTMT6plex [N-Term]	Q15691 1xPhospho [S155]	0.125388	0.00397712	1	1	1	Q15691	Q15691 [151-168]	0	2463.35	0							No Quan Values	Not Found	Not Found	Not Found	Not Found	Not Found	Not Found	Not Found	High	Not Found	Not Found	Not Found	High	0.001473	0.02432	3.74
FALSE	High	[R].QTQSESSNYDSELEK.[E]	1xPhospho [S11]; 1xTMT6plex [K15]; 1xTMT6plex [N-Term]	P46100 1xPhospho [S819]	6.19595e-05	0	1	1	2	P46100	P46100 [809-823]	0	2283.04	0							No Quan Values	Not Found	High	High	Not Found	Not Found	Not Found	Not Found	Not Found	Not Found	Not Found	Not Found	High	0	5.892e-06	3.85
FALSE	High	[R].TIAQDYGVLK.[A]	1xTMT6plex [K10]; 1xTMT6plex [N-Term]		6.07452e-06	0	1	1	1	Q06830	Q06830 [111-120]	0	1565.93	0							No Quan Values	Not Found	Not Found	Not Found	Not Found	Not Found	Not Found	Not Found	High	Not Found	Not Found	Not Found	High	0	6.886e-07	3.43
FALSE	High	[K].DPLSSPGGPGSR.[R]	1xPhospho [S]; 1xTMT6plex [N-Term]	Q32P44 1xPhospho [S]	0.0898755	0.0025315	1	1	3	Q32P44	Q32P44 [194-205]	0	1435.68	0							No Quan Values	Not Found	High	High	Not Found	Not Found	Not Found	Not Found	Not Found	Not Found	Not Found	Not Found	High	0.0009331	0.01406	1.63
FALSE	High	[R].ASATSTSKPNSPR.[V]	1xPhospho [S/T]; 1xTMT6plex [K8]; 1xTMT6plex [N-Term]	Q70CQ4 1xPhospho [S/T]	0.164117	0.00589781	1	1	2	Q70CQ4	Q70CQ4 [1168-1180]	0	1841.95	0							No Quan Values	Not Found	Not Found	Not Found	Not Found	Not Found	High	Not Found	Not Found	Not Found	Not Found	Not Found	High	0.002245	0.03672	2.15
FALSE	High	[R].KPGSHTHSASEDNTTNNVR.[E]	1xPhospho [T/S]; 1xTMT6plex [K1]; 1xTMT6plex [N-Term]	P78504 1xPhospho [S/T]	0.000118587	0	1	1	3	P78504	P78504 [1098-1116]	0	2590.24	0							No Quan Values	Not Found	Not Found	Not Found	Not Found	High	High	Not Found	Not Found	Not Found	Not Found	Not Found	High	0	1.074e-05	3.85
FALSE	High	[K].ASASLPGGSPEDGSLK.[K]	1xPhospho [S9]; 1xTMT6plex [K16]; 1xTMT6plex [N-Term]	O75364 1xPhospho [S52]	4.34689e-06	0	1	1	1	O75364	O75364 [44-59]	0	2011.01	0							No Quan Values	Not Found	Not Found	Not Found	Not Found	High	Not Found	Not Found	Not Found	Not Found	Not Found	Not Found	High	0	5.071e-07	3.89
FALSE	High	[K].KPGMFFNPEESELDLTYGNR.[Y]	1xTMT6plex [K1]; 1xTMT6plex [N-Term]		3.03067e-09	0	1	1	1	P11413	P11413 [408-427]	0	2802.42	0							No Quan Values	Not Found	Not Found	Not Found	Not Found	Not Found	Not Found	Not Found	Not Found	Not Found	High	Not Found	High	0	6.018e-10	6.45
FALSE	High	[K].TGTLTCNVMQFK.[K]	1xCarbamidomethyl [C6]; 1xPhospho [T5]; 1xOxidation [M9]; 1xTMT6plex [K12]; 1xTMT6plex [N-Term]		0.0812943	0.00245983	0	1	1			0	1953.96	0							No Quan Values	High	Not Found	Not Found	Not Found	Not Found	Not Found	Not Found	Not Found	Not Found	Not Found	Not Found	High	0.0008413	0.01189	2.77
FALSE	High	[R].QVTSNSLSGTQEDGLDDPR.[L]	1xTMT6plex [N-Term]		0.00017837	0	1	1	1	P30533	P30533 [132-150]	0	2248.09	0							No Quan Values	Not Found	Not Found	Not Found	Not Found	Not Found	Not Found	Not Found	Not Found	Not Found	High	Not Found	High	0	1.551e-05	3.4
FALSE	High	[R].NSITVPYK.[V]	1xPhospho [S2]; 1xTMT6plex [K8]; 1xTMT6plex [N-Term]	Q00577 1xPhospho [S256]	0.0311148	0.000389981	1	1	1	Q00577	Q00577 [255-262]	0	1459.8	0							No Quan Values	Not Found	Not Found	Not Found	Not Found	Not Found	High	Not Found	Not Found	Not Found	Not Found	Not Found	High	0.0001904	0.002612	2.63
FALSE	High	[R].TGSVQTPPDLESSEEVDAAEGAPEVVGPK.[S]	1xPhospho [S3]; 1xTMT6plex [K29]; 1xTMT6plex [N-Term]	P28290 1xPhospho [S1165]	0.000956306	0	1	1	1	P28290	P28290 [1163-1191]	0	3433.67	0							No Quan Values	Not Found	High	Not Found	Not Found	Not Found	Not Found	Not Found	Not Found	Not Found	Not Found	Not Found	High	0	6.775e-05	4.16
FALSE	High	[K].KMSQPGSPSPK.[T]	1xPhospho [S3]; 1xOxidation [M2]; 2xTMT6plex [K1; K11]; 1xTMT6plex [N-Term]	Q14839 1xPhospho [S1531]	0.0481465	0.000948301	1	1	1	Q14839	Q14839 [1529-1539]	1	1927.03	0							No Quan Values	Not Found	Not Found	Not Found	Not Found	Not Found	Not Found	High	Not Found	Not Found	Not Found	Not Found	High	0.0003407	0.005155	1.79
FALSE	High	[R].TGSIVLPYIMSSTLR.[R]	1xPhospho [S/T]; 1xTMT6plex [N-Term]	Q9H7D0 1xPhospho [S/T]	0.0510294	0.0010351	1	1	2	Q9H7D0	Q9H7D0 [1654-1668]	0	1947.02	0							No Quan Values	Not Found	Not Found	Not Found	Not Found	Not Found	Not Found	Not Found	High	Not Found	Not Found	Not Found	High	0.0003628	0.005636	3.24
FALSE	High	[R].QYDQEIENLEK.[Q]	1xTMT6plex [K11]; 1xTMT6plex [N-Term]		0.0013007	0.000108793	1	1	1	Q9H2G2	Q9H2G2 [873-883]	0	1866.98	0							No Quan Values	Not Found	Not Found	Not Found	Not Found	Not Found	Not Found	Not Found	Not Found	Not Found	High	Not Found	High	3.165e-05	8.69e-05	2.85
FALSE	High	[R].DQTPDENEEVIVR.[I]	1xTMT6plex [N-Term]		2.42888e-07	0	1	1	1	Q9Y6M1	Q9Y6M1 [548-560]	0	1772.89	0							No Quan Values	Not Found	Not Found	Not Found	Not Found	Not Found	Not Found	Not Found	Not Found	Not Found	High	Not Found	High	0	3.482e-08	5.32
FALSE	High	[K].ASAFALQEQPVVNAVIDDTTK.[E]	1xTMT6plex [K21]; 1xTMT6plex [N-Term]		8.38004e-08	0	1	1	1	P36957	P36957 [287-307]	0	2675.47	0							No Quan Values	Not Found	Not Found	Not Found	Not Found	Not Found	Not Found	Not Found	Not Found	Not Found	High	Not Found	High	0	1.305e-08	4.83
FALSE	High	[R].VLGSEGEEEDEALSPAK.[G]	1xPhospho [S14]; 1xTMT6plex [K17]; 1xTMT6plex [N-Term]	P18858 1xPhospho [S76]	1.13196e-05	0	1	1	1	P18858	P18858 [63-79]	0	2298.12	0							No Quan Values	Not Found	Not Found	High	Not Found	Not Found	Not Found	Not Found	Not Found	Not Found	Not Found	Not Found	High	0	1.226e-06	4.19
FALSE	High	[R].TGQPDLLGTGTLGPSPTATGTLGR.[M]	1xPhospho [T/S]; 1xTMT6plex [N-Term]	Q9NVM1 1xPhospho [S/T]	9.91361e-11	0	1	1	3	Q9NVM1	Q9NVM1 [138-161]	0	2577.31	0							No Quan Values	Not Found	Not Found	Not Found	Not Found	Not Found	High	Not Found	Not Found	Not Found	Not Found	Not Found	High	0	2.53e-11	5.98
FALSE	High	[R].RALGTSIGKCPK.[N]	1xCarbamidomethyl [C10]; 1xPhospho [T5]; 2xTMT6plex [K9; K12]; 1xTMT6plex [N-Term]	Q9BZJ0 1xPhospho [T598]	0.115124	0.00328961	1	1	1	Q9BZJ0	Q9BZJ0 [594-605]	2	2055.18	0							No Quan Values	Not Found	Not Found	Not Found	Not Found	Not Found	Not Found	Not Found	High	Not Found	Not Found	Not Found	High	0.001175	0.02097	1.89
FALSE	High	[R].KLSSIGIQVDCIQPVPK.[E]	1xCarbamidomethyl [C11]; 1xPhospho [S]; 2xTMT6plex [K1; K17]; 1xTMT6plex [N-Term]	Q9Y2H0 1xPhospho [S]	0.00248756	0.000108793	1	1	2	Q9Y2H0	Q9Y2H0 [663-679]	1	2649.5	0							No Quan Values	Not Found	Not Found	Not Found	Not Found	Not Found	Not Found	Not Found	High	Not Found	Not Found	Not Found	High	3.165e-05	0.0001492	4.27
FALSE	High	[K].TGENVEDAFLEAAK.[K]	1xTMT6plex [K14]; 1xTMT6plex [N-Term]		1.47944e-05	0	1	1	1	P61106	P61106 [157-170]	0	1952.04	0							No Quan Values	Not Found	Not Found	Not Found	Not Found	Not Found	Not Found	Not Found	Not Found	Not Found	High	Not Found	High	0	1.571e-06	3.81
FALSE	High	[K].TGEEDEEEFFCNR.[A]	1xCarbamidomethyl [C11]; 1xTMT6plex [N-Term]		0.00146704	0.000108793	1	1	1	P49792	P49792 [1186-1198]	0	1890.8	0							No Quan Values	Not Found	Not Found	Not Found	Not Found	Not Found	Not Found	Not Found	Not Found	Not Found	High	Not Found	High	3.165e-05	9.62e-05	2.64
FALSE	High	[R].TFLEGDWTSPSK.[S]	1xPhospho [S/T]; 1xTMT6plex [K12]; 1xTMT6plex [N-Term]	Q8NDT2 1xPhospho [S/T]	0.164117	0.00589781	1	1	2	Q8NDT2	Q8NDT2 [544-555]	0	1905.94	0							No Quan Values	Not Found	Not Found	Not Found	Not Found	Not Found	Not Found	High	Not Found	Not Found	Not Found	Not Found	High	0.002245	0.03673	2.01
FALSE	High	[R].KNSAIPSELNEK.[Q]	1xPhospho [S3]; 2xTMT6plex [K1; K12]; 1xTMT6plex [N-Term]	Q96CV9 1xPhospho [S342]	9.70159e-05	0	1	1	1	Q96CV9	Q96CV9 [340-351]	1	2097.16	0							No Quan Values	Not Found	Not Found	Not Found	Not Found	Not Found	Not Found	High	Not Found	Not Found	Not Found	Not Found	High	0	8.911e-06	4.84
FALSE	High	[K].QQTLEAEEAK.[R]	1xTMT6plex [K10]; 1xTMT6plex [N-Term]		6.44982e-05	0	1	1	1	Q16643	Q16643 [239-248]	0	1604.89	0							No Quan Values	Not Found	Not Found	Not Found	Not Found	Not Found	Not Found	Not Found	Not Found	Not Found	High	Not Found	High	0	6.117e-06	3.5
FALSE	High	[K].TIGSPPNEFYCSENTSVPNESNK.[I]	1xCarbamidomethyl [C11]; 1xPhospho [S4]; 1xTMT6plex [K23]; 1xTMT6plex [N-Term]	Q8NB14 1xPhospho [S680]	0.0420163	0.000856746	1	1	1	Q8NB14	Q8NB14 [677-699]	0	3109.42	0							No Quan Values	Not Found	Not Found	Not Found	Not Found	High	Not Found	Not Found	Not Found	Not Found	Not Found	Not Found	High	0.0003161	0.004146	2.98
FALSE	High	[K].TLHPDLGTDKDKEQWK.[E]	3xTMT6plex [K10; K12; K16]; 1xTMT6plex [N-Term]		0.00957771	0.000209539	1	1	1	P00338	P00338 [213-228]	2	2827.61	0							No Quan Values	Not Found	High	Not Found	Not Found	Not Found	Not Found	Not Found	Not Found	Not Found	Not Found	Not Found	High	6.142e-05	0.0005768	1.6
FALSE	High	[R].DLQFVEVTDVK.[V]	1xTMT6plex [K11]; 1xTMT6plex [N-Term]		0.00250424	0.000108793	1	1	1	P02751	P02751 [912-922]	0	1751	0							No Quan Values	Not Found	Not Found	Not Found	Not Found	Not Found	Not Found	Not Found	Not Found	Not Found	High	Not Found	High	3.165e-05	0.0001495	2.93
FALSE	High	[K].ASMSEFLESEDGEVEQQR.[T]	1xPhospho [S9]; 1xOxidation [M3]; 1xTMT6plex [N-Term]	Q15022 1xPhospho [S546]	0.0161901	0.000295797	1	1	1	Q15022	Q15022 [538-555]	0	2396.02	0							No Quan Values	Not Found	Not Found	High	Not Found	Not Found	Not Found	Not Found	Not Found	Not Found	Not Found	Not Found	High	0.000144	0.001065	2.53
FALSE	High	[R].ILDDDTIITTLENLK.[R]	1xTMT6plex [K15]; 1xTMT6plex [N-Term]		2.19634e-06	0	1	1	1	Q14204	Q14204 [3760-3774]	0	2175.25	0							No Quan Values	Not Found	Not Found	Not Found	Not Found	Not Found	Not Found	Not Found	Not Found	Not Found	High	Not Found	High	0	2.684e-07	4.46
FALSE	High	[K].DLSAIR.[A]	1xPhospho [S3]; 1xTMT6plex [N-Term]		0.195346	0.00813275	0	1	1			0	983.512	0							No Quan Values	Not Found	High	Not Found	Not Found	Not Found	Not Found	Not Found	Not Found	Not Found	Not Found	Not Found	High	0.003228	0.04705	1.77
FALSE	High	[R].QNLWFANPGGSNSMPSQSR.[S]	1xPhospho [S16]; 1xOxidation [M14]; 1xTMT6plex [N-Term]	Q5PRF9 1xPhospho [S631]	0.000777248	0	1	1	1	Q5PRF9	Q5PRF9 [616-634]	0	2403.08	0							No Quan Values	Not Found	Not Found	Not Found	Not Found	Not Found	Not Found	Not Found	High	Not Found	Not Found	Not Found	High	0	5.7e-05	3.09
FALSE	High	[R].DLSENNDQR.[Q]	1xTMT6plex [N-Term]		0.000579088	0	1	1	1	Q8NBJ4	Q8NBJ4 [189-197]	0	1319.64	0							No Quan Values	Not Found	Not Found	Not Found	Not Found	Not Found	Not Found	Not Found	Not Found	Not Found	High	Not Found	High	0	4.435e-05	3.13
FALSE	High	[K].DLSEVSETTESTDVK.[D]	1xTMT6plex [K15]; 1xTMT6plex [N-Term]		1.22662e-05	0	1	1	1	P41227	P41227 [211-225]	0	2098.08	0							No Quan Values	Not Found	Not Found	Not Found	Not Found	Not Found	Not Found	Not Found	Not Found	Not Found	High	Not Found	High	0	1.324e-06	4.12
FALSE	High	[K].KSESPFRETEPLVSPHQDK.[L]	1xPhospho [S4]; 2xTMT6plex [K1; K19]; 1xTMT6plex [N-Term]	Q9BYW2 1xPhospho [S744]	0.00165463	0.000108793	1	1	1	Q9BYW2	Q9BYW2 [741-759]	2	2978.56	0							No Quan Values	Not Found	Not Found	Not Found	Not Found	Not Found	High	Not Found	Not Found	Not Found	Not Found	Not Found	High	3.165e-05	0.000106	4.52
FALSE	High	[K].VHVIFNYK.[G]	1xTMT6plex [K8]; 1xTMT6plex [N-Term]		0.000631699	0	1	1	1	P27797	P27797 [144-151]	0	1477.89	0							No Quan Values	High	Not Found	Not Found	Not Found	Not Found	Not Found	Not Found	Not Found	Not Found	Not Found	Not Found	High	0	4.796e-05	2.12
FALSE	High	[R].KSELVVEVK.[S]	1xPhospho [S2]; 2xTMT6plex [K1; K9]; 1xTMT6plex [N-Term]	P43121 1xPhospho [S606]	0.0327893	0.000389981	1	1	1	P43121	P43121 [605-613]	1	1798.07	0							No Quan Values	Not Found	Not Found	Not Found	Not Found	Not Found	Not Found	High	Not Found	Not Found	Not Found	Not Found	High	0.0001904	0.00282	3.31
FALSE	High	[K].TLTDEVNSPDSDR.[R]	1xPhospho [S8]; 1xTMT6plex [N-Term]	Q8TAQ2 1xPhospho [S283]	0.00247099	0.000108793	1	1	1	Q8TAQ2	Q8TAQ2 [276-288]	0	1757.78	0							No Quan Values	Not Found	Not Found	Not Found	Not Found	Not Found	Not Found	Not Found	Not Found	Not Found	Not Found	High	High	3.165e-05	0.0001479	3
FALSE	High	[K].NSSLLSFDNEDENE.[-]	1xTMT6plex [N-Term]		0.0187305	0.000295797	1	1	1	Q96AT1	Q96AT1 [141-154]	0	1841.82	0							No Quan Values	Not Found	Not Found	Not Found	Not Found	Not Found	Not Found	Not Found	Not Found	Not Found	High	Not Found	High	0.000144	0.001283	2.44
FALSE	High	[K].DNPGVVTCLDEAR.[H]	1xCarbamidomethyl [C8]; 1xTMT6plex [N-Term]		0.00743549	0.000108793	1	1	1	P22314	P22314 [227-239]	0	1674.83	0							No Quan Values	Not Found	Not Found	Not Found	Not Found	Not Found	Not Found	Not Found	Not Found	Not Found	High	Not Found	High	3.165e-05	0.0004318	2.98
FALSE	High	[K].VLAGETLSVNDPPDVLDR.[Q]	1xTMT6plex [N-Term]		3.06925e-06	0	1	1	1	Q12906	Q12906 [183-200]	0	2139.15	0							No Quan Values	Not Found	Not Found	Not Found	Not Found	Not Found	Not Found	Not Found	Not Found	Not Found	High	Not Found	High	0	3.662e-07	4.22
FALSE	High	[R].ASGDYDNDCTNPITPLCTQPDQVIK.[G]	2xCarbamidomethyl [C9; C17]; 1xPhospho [S2]; 1xTMT6plex [K25]; 1xTMT6plex [N-Term]	Q8TAF3 1xPhospho [S335]	5.46301e-10	0	1	1	1	Q8TAF3	Q8TAF3 [334-358]	0	3360.55	0							No Quan Values	Not Found	Not Found	Not Found	Not Found	High	Not Found	Not Found	Not Found	Not Found	Not Found	Not Found	High	0	1.228e-10	6.65
FALSE	High	[R].DLYEDELVPLFEK.[A]	1xTMT6plex [K13]; 1xTMT6plex [N-Term]		0.000104427	0	1	1	1	O43390	O43390 [175-187]	0	2068.13	0							No Quan Values	Not Found	Not Found	Not Found	Not Found	Not Found	Not Found	Not Found	Not Found	Not Found	High	Not Found	High	0	9.506e-06	3.7
FALSE	High	[R].TISNPEVVMK.[R]	1xPhospho [S3]; 1xTMT6plex [K10]; 1xTMT6plex [N-Term]	P55196 1xPhospho [S216]	0.000831009	0	1	1	1	P55196	P55196 [214-223]	0	1655.88	0							No Quan Values	Not Found	Not Found	Not Found	Not Found	Not Found	High	Not Found	Not Found	Not Found	Not Found	Not Found	High	0	6.051e-05	3.46
FALSE	High	[K].TLSMPSGPSGK.[R]	1xPhospho [S3]; 1xTMT6plex [K11]; 1xTMT6plex [N-Term]	Q4ADV7 1xPhospho [S1037]	0.00178088	0.000108793	1	1	1	Q4ADV7	Q4ADV7 [1035-1045]	0	1599.82	0							No Quan Values	Not Found	Not Found	Not Found	Not Found	Not Found	Not Found	High	Not Found	Not Found	Not Found	Not Found	High	3.165e-05	0.0001126	2.5
FALSE	High	[R].IIDQSSNVEIASFPIYK.[V]	2xPhospho [S12; Y16]; 1xTMT6plex [K17]; 1xTMT6plex [N-Term]	Q5R372 2xPhospho [S193; Y197]	0.163155	0.00582095	1	1	1	Q5R372	Q5R372 [182-198]	0	2542.26	0							No Quan Values	Not Found	Not Found	Not Found	Not Found	Not Found	Not Found	Not Found	Not Found	Not Found	High	Not Found	High	0.002245	0.0366	3.38
FALSE	High	[K].VLDNAIETEK.[M]	1xTMT6plex [K10]; 1xTMT6plex [N-Term]		0.0113112	0.000209539	1	1	1	Q01082	Q01082 [293-302]	0	1589.92	0							No Quan Values	Not Found	Not Found	Not Found	Not Found	Not Found	Not Found	Not Found	Not Found	Not Found	High	Not Found	High	6.142e-05	0.0006942	2.63
FALSE	High	[R].QSLGHGQHGSGSGQSPSPSR.[G]	1xPhospho [S]; 1xTMT6plex [N-Term]	Q86YZ3 1xPhospho [S]; 1xPhospho [S]; 1xPhospho [S]; 1xPhospho [S]	5.64337e-06	0	1	1	2	Q86YZ3	Q86YZ3 [992-1011]; [1462-1481]; [1932-1951]; [2402-2421]	0	2257.03	0							No Quan Values	Not Found	Not Found	Not Found	Not Found	High	Not Found	Not Found	Not Found	Not Found	Not Found	Not Found	High	0	6.423e-07	3.8
FALSE	High	[K].DMNLTLEPEIMPAATDNR.[Y]	1xTMT6plex [N-Term]		0.000131989	0	1	1	1	Q03154	Q03154 [333-350]	0	2260.12	0							No Quan Values	Not Found	Not Found	Not Found	Not Found	Not Found	Not Found	Not Found	Not Found	Not Found	High	Not Found	High	0	1.181e-05	3.46
FALSE	High	[R].DMNQVLDAYENK.[K]	1xOxidation [M2]; 1xTMT6plex [K12]; 1xTMT6plex [N-Term]		6.07279e-05	0	1	1	1	P23381	P23381 [142-153]	0	1913.97	0							No Quan Values	Not Found	Not Found	Not Found	Not Found	Not Found	Not Found	Not Found	Not Found	Not Found	High	Not Found	High	0	5.808e-06	3.63
FALSE	High	[K].TIPVKSPNLSEIK.[F]	1xPhospho [S6]; 2xTMT6plex [K5; K13]; 1xTMT6plex [N-Term]	Q9H792 1xPhospho [S587]	0.0220971	0.000295797	1	1	1	Q9H792	Q9H792 [582-594]	1	2193.29	0							No Quan Values	Not Found	Not Found	Not Found	Not Found	Not Found	Not Found	Not Found	High	Not Found	Not Found	Not Found	High	0.0001658	0.001591	2.85
FALSE	High	[K].TIPSWATLSASQLAR.[A]	1xPhospho [S11]; 1xTMT6plex [N-Term]	Q5SSJ5 1xPhospho [S142]	0.0120087	0.000209539	1	1	1	Q5SSJ5	Q5SSJ5 [132-146]	0	1910.99	0							No Quan Values	Not Found	Not Found	Not Found	Not Found	Not Found	Not Found	Not Found	High	Not Found	Not Found	Not Found	High	0.0001195	0.0007434	2.96
FALSE	High	[R].DNIQGITKPAIR.[R]	1xTMT6plex [K8]; 1xTMT6plex [N-Term]		0.00217632	0.000108793	1	1	1	P62805	P62805 [25-36]	0	1784.08	0							No Quan Values	Not Found	Not Found	Not Found	Not Found	Not Found	Not Found	Not Found	High	Not Found	Not Found	Not Found	High	3.165e-05	0.0001329	2.25
FALSE	High	[R].DLVMGSSPQLK.[R]	1xPhospho [S6]; 1xOxidation [M4]; 1xTMT6plex [K11]; 1xTMT6plex [N-Term]	Q53LP3 1xPhospho [S212]	0.205635	0.00868388	1	1	1	Q53LP3	Q53LP3 [207-217]	0	1728.9	0							No Quan Values	Not Found	Not Found	Not Found	Not Found	Not Found	High	Not Found	Not Found	Not Found	Not Found	Not Found	High	0.003368	0.05064	2.17
FALSE	High	[R].KYSSSSLSHMGAYSR.[S]	1xPhospho [S3]; 1xTMT6plex [K1]; 1xTMT6plex [N-Term]	Q86SQ0 1xPhospho [S242]	0.00138137	0.000108793	1	1	1	Q86SQ0	Q86SQ0 [240-254]	1	2199.07	0							No Quan Values	Not Found	Not Found	Not Found	Not Found	Not Found	Not Found	Not Found	High	Not Found	Not Found	Not Found	High	3.165e-05	9.14e-05	3.38
FALSE	High	[R].TQTAIASEDMPNTLTEAEK.[L]	1xOxidation [M10]; 1xTMT6plex [K19]; 1xTMT6plex [N-Term]		1.0592e-07	0	1	1	1	Q01082	Q01082 [1081-1099]	0	2524.29	0							No Quan Values	Not Found	Not Found	Not Found	Not Found	Not Found	Not Found	Not Found	Not Found	Not Found	High	Not Found	High	0	1.621e-08	5.08
FALSE	High	[R].QMQLENVSVALEFLDR.[E]	1xOxidation [M2]; 1xTMT6plex [N-Term]		0.00238978	0.000108793	2	2	1	P21333; O75369	P21333 [101-116]; O75369 [74-89]	0	2137.12	0							No Quan Values	Not Found	Not Found	Not Found	Not Found	Not Found	Not Found	Not Found	Not Found	Not Found	High	Not Found	High	3.165e-05	0.0001439	3.18
FALSE	High	[K].IEGYEDQVLITEHGDLGNSR.[F]	1xTMT6plex [N-Term]		1.47066e-08	0	1	1	1	P52907	P52907 [67-86]	0	2474.24	0							No Quan Values	Not Found	Not Found	Not Found	Not Found	Not Found	Not Found	Not Found	Not Found	Not Found	High	Not Found	High	0	2.593e-09	5.5
FALSE	High	[K].VADPVDSSNLDTCGSISQVIEQLPQPNR.[T]	1xCarbamidomethyl [C13]; 1xTMT6plex [N-Term]		6.2828e-07	0	1	1	1	Q12888	Q12888 [89-116]	0	3268.63	0							No Quan Values	Not Found	Not Found	Not Found	Not Found	Not Found	Not Found	Not Found	Not Found	Not Found	High	Not Found	High	0	8.426e-08	4.83
FALSE	High	[R].VADAKGDSESEEDEDLEVPVPSR.[F]	1xPhospho [S8]; 1xTMT6plex [K5]; 1xTMT6plex [N-Term]	P13861 1xPhospho [S78]	0.000109436	0	1	1	1	P13861	P13861 [71-93]	1	3011.41	0							No Quan Values	Not Found	Not Found	High	Not Found	Not Found	Not Found	Not Found	Not Found	Not Found	Not Found	Not Found	High	0	9.944e-06	3.93
FALSE	High	[R].VAAQSPPSPASAEALLPALPLR.[N]	1xPhospho [S5]; 1xTMT6plex [N-Term]	Q9Y4F5 1xPhospho [S1545]	2.77745e-08	0	1	1	1	Q9Y4F5	Q9Y4F5 [1541-1562]	0	2465.34	0							No Quan Values	Not Found	Not Found	Not Found	Not Found	Not Found	Not Found	High	Not Found	Not Found	Not Found	Not Found	High	0	4.695e-09	5.43
FALSE	High	[K].VDVEGPDVNIEGPEGK.[L]	1xTMT6plex [K16]; 1xTMT6plex [N-Term]		5.20914e-07	0	1	1	1	Q09666	Q09666 [2930-2945]	0	2112.12	0							No Quan Values	Not Found	Not Found	Not Found	Not Found	Not Found	Not Found	Not Found	Not Found	Not Found	High	Not Found	High	0	7.083e-08	4.89
FALSE	High	[K].QAIEEEGGDPDNIELTVSTDTPNK.[K]	1xTMT6plex [K24]; 1xTMT6plex [N-Term]		3.21726e-07	0	1	1	1	Q9NWH9	Q9NWH9 [54-77]	0	3030.52	0							No Quan Values	Not Found	Not Found	Not Found	Not Found	Not Found	Not Found	Not Found	Not Found	Not Found	High	Not Found	High	0	4.544e-08	5.24
FALSE	High	[K].LEGELQAPDLELSLPAIHVEGLDIK.[A]	1xTMT6plex [K25]; 1xTMT6plex [N-Term]		2.77608e-06	0	1	1	1	Q09666	Q09666 [5113-5137]	0	3157.78	0							No Quan Values	Not Found	Not Found	Not Found	Not Found	Not Found	Not Found	Not Found	Not Found	Not Found	High	Not Found	High	0	3.33e-07	4.49
FALSE	High	[K].LEGDLTGPSVGVEVPDVELECPDAK.[L]	1xCarbamidomethyl [C21]; 1xTMT6plex [K25]; 1xTMT6plex [N-Term]		5.87894e-09	0	1	1	2	Q09666	Q09666 [1880-1904]; [1947-1971]	0	3083.59	0							No Quan Values	Not Found	Not Found	Not Found	Not Found	Not Found	Not Found	Not Found	Not Found	Not Found	High	Not Found	High	0	1.111e-09	5.91
FALSE	High	[R].QEPYTLPQGFTWDALDLGDR.[G]	1xTMT6plex [N-Term]		1.51958e-05	0	1	1	1	P30419	P30419 [147-166]	0	2551.27	0							No Quan Values	Not Found	Not Found	Not Found	Not Found	Not Found	Not Found	Not Found	Not Found	Not Found	High	Not Found	High	0	1.615e-06	4.57
FALSE	High	[R].QEQAGQLPTGGGPSQEVEPAEGPEEAAAGR.[S]	1xTMT6plex [N-Term]		9.02247e-09	0	1	1	1	Q92508	Q92508 [1471-1500]	0	3176.53	0							No Quan Values	Not Found	Not Found	Not Found	Not Found	Not Found	Not Found	Not Found	Not Found	Not Found	High	Not Found	High	0	1.654e-09	5.38
FALSE	High	[K].CIFMSETQSSPTK.[G]	1xCarbamidomethyl [C1]; 1xPhospho [T/S]; 1xTMT6plex [K13]; 1xTMT6plex [N-Term]	O75928 1xPhospho [T/S]	0.00359226	0.000108793	1	1	2	O75928	O75928 [490-502]	0	2053.97	0							No Quan Values	Not Found	Not Found	Not Found	Not Found	Not Found	Not Found	High	Not Found	Not Found	Not Found	Not Found	High	9.162e-05	0.0006972	3.64
FALSE	High	[K].TWTFCGTPEYVAPEVILNK.[G]	1xCarbamidomethyl [C5]; 1xPhospho [T]; 1xTMT6plex [K19]; 1xTMT6plex [N-Term]	Q13237 1xPhospho [T]	0.000288776	0	1	1	2	Q13237	Q13237 [607-625]	0	2763.39	0							No Quan Values	Not Found	Not Found	Not Found	Not Found	Not Found	Not Found	High	Not Found	Not Found	Not Found	Not Found	High	0	2.401e-05	4.27
FALSE	High	[K].VAEDLESEGLMAEEVQAVQQQEVYGMMPR.[D]	1xOxidation [M]; 1xTMT6plex [N-Term]		8.48621e-05	0	1	1	3	Q13813	Q13813 [1153-1181]	0	3511.66	0							No Quan Values	Not Found	Not Found	Not Found	Not Found	Not Found	Not Found	Not Found	Not Found	Not Found	High	Not Found	High	0	2.51e-05	3.25
FALSE	High	[K].VECYDYDNDGSHDLIGTFQTTMTK.[L]	1xCarbamidomethyl [C3]; 1xTMT6plex [K24]; 1xTMT6plex [N-Term]		1.10206e-05	0	1	1	1	O75131	O75131 [212-235]	0	3268.52	0							No Quan Values	Not Found	Not Found	Not Found	Not Found	Not Found	Not Found	Not Found	Not Found	Not Found	High	Not Found	High	0	1.2e-06	4.42
FALSE	High	[R].IEEELGSK.[A]	1xPhospho [S7]; 1xTMT6plex [K8]; 1xTMT6plex [N-Term]	P06733 1xPhospho [S419]	0.112334	0.00320872	1	1	1	P06733	P06733 [413-420]	0	1442.75	0							No Quan Values	Not Found	Not Found	High	Not Found	Not Found	Not Found	Not Found	Not Found	Not Found	Not Found	Not Found	High	0.001152	0.02018	2.76
FALSE	High	[K].QESTEYR.[R]	1xTMT6plex [N-Term]		0.0558449	0.00112764	1	1	1	P08670	P08670 [314-320]	0	1141.57	0							No Quan Values	High	Not Found	Not Found	Not Found	Not Found	Not Found	Not Found	Not Found	Not Found	Not Found	Not Found	High	0.0004359	0.006526	2.23
FALSE	High	[K].QETVADFTPKKEEEESQPAK.[K]	1xPhospho [T8]; 3xTMT6plex [K10; K11; K20]; 1xTMT6plex [N-Term]	O75400 1xPhospho [T373]	0.0388595	0.00057911	1	1	1	O75400	O75400 [366-385]	2	3287.72	0							No Quan Values	Not Found	Not Found	Not Found	Not Found	High	Not Found	Not Found	Not Found	Not Found	Not Found	Not Found	High	0.0002679	0.003659	3.31
FALSE	High	[K].LGGTIDDCELVEGLVLTQK.[V]	1xCarbamidomethyl [C8]; 1xTMT6plex [K19]; 1xTMT6plex [N-Term]		2.31828e-08	0	1	1	1	P50991	P50991 [214-232]	0	2518.38	0							No Quan Values	Not Found	Not Found	Not Found	Not Found	Not Found	Not Found	Not Found	Not Found	Not Found	High	Not Found	High	0	3.957e-09	4.95
FALSE	High	[R].QEVGPPLPPLLAPLIATPPR.[T]	1xPhospho [T17]; 1xTMT6plex [N-Term]	Q9Y2F5 1xPhospho [T1642]	0.000937312	0	1	1	1	Q9Y2F5	Q9Y2F5 [1626-1645]	0	2385.35	0							No Quan Values	Not Found	Not Found	Not Found	Not Found	Not Found	Not Found	Not Found	High	Not Found	Not Found	Not Found	High	0	6.671e-05	3.84
FALSE	High	[R].QAEPELDLR.[S]	1xTMT6plex [N-Term]		0.0807841	0.00237242	1	1	1	P20810	P20810 [302-310]	0	1299.71	0							No Quan Values	Not Found	Not Found	Not Found	Not Found	Not Found	Not Found	Not Found	Not Found	Not Found	High	Not Found	High	0.0008192	0.01184	2.42
FALSE	High	[R].QFASQANVVGPWIQTK.[M]	1xPhospho [S4]; 1xTMT6plex [K16]; 1xTMT6plex [N-Term]	O43707 1xPhospho [S656]	1.0874e-05	0	1	1	1	O43707	O43707 [653-668]	0	2312.22	0							No Quan Values	Not Found	Not Found	Not Found	Not Found	Not Found	Not Found	Not Found	High	Not Found	Not Found	Not Found	High	0	1.185e-06	4.28
FALSE	High	[K].QFDNYGEEFTMHDTIGCYLDIDK.[G]	1xCarbamidomethyl [C17]; 1xTMT6plex [K23]; 1xTMT6plex [N-Term]		0.083365	0.00245983	1	1	1	Q92499	Q92499 [178-200]	0	3269.52	0							No Quan Values	Not Found	Not Found	Not Found	Not Found	Not Found	Not Found	Not Found	Not Found	Not Found	High	Not Found	High	0.0008413	0.01249	2.63
FALSE	High	[R].VEELERSLSR.[L]	1xTMT6plex [N-Term]		0.213943	0.00984916	0	2	1			1	1446.81	0							No Quan Values	Not Found	Not Found	Not Found	Not Found	Not Found	Not Found	Not Found	Not Found	Not Found	High	Not Found	High	0.003827	0.05346	2.43
FALSE	High	[R].CQVFEETQIGGER.[Y]	1xCarbamidomethyl [C1]; 1xTMT6plex [N-Term]		0.0303091	0.000295797	1	1	1	Q99832	Q99832 [345-357]	0	1781.87	0							No Quan Values	Not Found	Not Found	Not Found	Not Found	Not Found	Not Found	Not Found	Not Found	Not Found	High	Not Found	High	0.0001658	0.002499	2.79
FALSE	High	[K].ATDLSIQPPSADLEVQAGQVDVK.[L]	1xTMT6plex [K23]; 1xTMT6plex [N-Term]		4.2891e-06	0	1	1	1	Q8IVF2	Q8IVF2 [878-900]; [1538-1560]; [2528-2550]	0	2839.55	0							No Quan Values	Not Found	Not Found	Not Found	Not Found	Not Found	Not Found	Not Found	Not Found	Not Found	High	Not Found	High	0	5.003e-07	3.98
FALSE	High	[R].CSAGLGALAQRPGSVSK.[W]	1xCarbamidomethyl [C1]; 1xPhospho [S2]; 1xTMT6plex [K17]; 1xTMT6plex [N-Term]	Q9NXV2 1xPhospho [S29]	0.00122474	0.000108793	1	1	1	Q9NXV2	Q9NXV2 [28-44]	0	2197.16	0							No Quan Values	Not Found	Not Found	Not Found	Not Found	Not Found	Not Found	Not Found	High	Not Found	Not Found	Not Found	High	3.165e-05	8.293e-05	3.48
FALSE	High	[R].VEEEAAQK.[N]	1xTMT6plex [K8]; 1xTMT6plex [N-Term]		0.00561879	0.000108793	1	1	1	P35579	P35579 [1092-1099]	0	1361.77	0							No Quan Values	Not Found	Not Found	Not Found	Not Found	Not Found	Not Found	Not Found	Not Found	Not Found	High	Not Found	High	3.165e-05	0.0003216	2.9
FALSE	High	[R].QGAIVAVTGDGVNDSPALK.[K]	1xTMT6plex [K19]; 1xTMT6plex [N-Term]		1.98655e-06	0	1	3	1	P05023	P05023 [708-726]	0	2270.28	0							No Quan Values	Not Found	Not Found	Not Found	Not Found	Not Found	Not Found	Not Found	Not Found	Not Found	High	Not Found	High	0	2.443e-07	4.54
FALSE	High	[R].QEMGEEEEENETFGLSR.[E]	1xTMT6plex [N-Term]		2.90924e-06	0	1	1	1	Q0ZGT2	Q0ZGT2 [413-429]	0	2243	0							No Quan Values	Not Found	Not Found	Not Found	Not Found	Not Found	Not Found	Not Found	Not Found	Not Found	High	Not Found	High	0	3.481e-07	4.53
FALSE	High	[R].ATPSENLVPSSAR.[V]	1xPhospho [T2]; 1xTMT6plex [N-Term]	Q8N684 1xPhospho [T203]	0.135646	0.0044861	1	1	1	Q8N684	Q8N684 [202-214]	0	1637.81	0							No Quan Values	Not Found	Not Found	High	Not Found	Not Found	Not Found	Not Found	Not Found	Not Found	Not Found	Not Found	High	0.001675	0.02741	2.72
FALSE	High	[K].VDINAPDVDVQGPDWHLK.[M]	1xTMT6plex [K18]; 1xTMT6plex [N-Term]		0.00017135	0	1	1	1	Q09666	Q09666 [3132-3149]; [3786-3803]	0	2476.32	0							No Quan Values	Not Found	Not Found	Not Found	Not Found	Not Found	Not Found	Not Found	Not Found	Not Found	High	Not Found	High	0	1.496e-05	4.33
FALSE	High	[K].LFSNMLILK.[T]	1xPhospho [S3]; 1xTMT6plex [K9]; 1xTMT6plex [N-Term]		0.0828428	0.00245983	0	1	1			0	1616.93	0							No Quan Values	Not Found	Not Found	Not Found	Not Found	Not Found	Not Found	Not Found	Not Found	Not Found	High	Not Found	High	0.0008413	0.01233	2.41
FALSE	High	[K].VDIDVPDVNIEGPEGK.[L]	1xTMT6plex [K16]; 1xTMT6plex [N-Term]		1.09471e-05	0	1	1	1	Q09666	Q09666 [3058-3073]; [3840-3855]	0	2154.17	0							No Quan Values	Not Found	Not Found	Not Found	Not Found	Not Found	Not Found	Not Found	Not Found	Not Found	High	Not Found	High	0	1.188e-06	4.35
FALSE	High	[K].AVGMPSPVSPK.[L]	1xPhospho [S9]; 1xOxidation [M4]; 1xTMT6plex [K11]; 1xTMT6plex [N-Term]	Q9UHB7 1xPhospho [S1058]	0.000836585	0	1	1	1	Q9UHB7	Q9UHB7 [1050-1060]	0	1623.86	0							No Quan Values	Not Found	Not Found	Not Found	Not Found	Not Found	High	Not Found	Not Found	Not Found	Not Found	Not Found	High	0	6.066e-05	3.01
FALSE	High	[K].AVNPTPSSWSLDSGK.[E]	1xPhospho [S10]; 1xTMT6plex [K15]; 1xTMT6plex [N-Term]	Q8N1I0 1xPhospho [S1769]	0.0106539	0.000209539	1	1	1	Q8N1I0	Q8N1I0 [1760-1774]	0	2084.05	0							No Quan Values	Not Found	Not Found	Not Found	Not Found	Not Found	High	Not Found	Not Found	Not Found	Not Found	Not Found	High	6.142e-05	0.000648	2.73
FALSE	High	[K].LFLNETQTQEITEDIPVK.[T]	1xTMT6plex [K18]; 1xTMT6plex [N-Term]		1.82146e-07	0	1	1	1	P41252	P41252 [1227-1244]	0	2576.42	0							No Quan Values	Not Found	Not Found	Not Found	Not Found	Not Found	Not Found	Not Found	Not Found	Not Found	High	Not Found	High	0	2.671e-08	4.24
FALSE	High	[K].VDGSNLEGGSQQAPLTPPNTPDPR.[S]	1xPhospho [T16]; 1xTMT6plex [N-Term]	Q9NPC6 1xPhospho [T107]	0.164117	0.00589781	1	1	1	Q9NPC6	Q9NPC6 [92-115]	0	2756.31	0							No Quan Values	Not Found	Not Found	High	Not Found	Not Found	Not Found	Not Found	Not Found	Not Found	Not Found	Not Found	High	0.002245	0.03669	2.51
FALSE	High	[K].LFIGGLSFETTDESLR.[S]	1xTMT6plex [N-Term]		0.0689641	0.00175403	1	2	1	P09651	P09651 [16-31]	0	2014.07	0							No Quan Values	Not Found	Not Found	Not Found	Not Found	Not Found	Not Found	Not Found	Not Found	Not Found	High	Not Found	High	0.0005796	0.009195	1.63
FALSE	High	[K].LFEEPEDPSNR.[S]	1xTMT6plex [N-Term]		0.0109412	0.000209539	1	2	1	P63151	P63151 [268-278]	0	1561.77	0							No Quan Values	Not Found	Not Found	Not Found	Not Found	Not Found	Not Found	Not Found	Not Found	Not Found	High	Not Found	High	6.142e-05	0.0006694	2.18
FALSE	High	[K].QDQISASELR.[Q]	1xPhospho [S7]; 1xTMT6plex [N-Term]	O60281 1xPhospho [S908]	0.0634809	0.00158026	1	1	2	O60281	O60281 [902-911]	0	1455.7	0							No Quan Values	Not Found	High	High	Not Found	Not Found	Not Found	Not Found	Not Found	Not Found	Not Found	Not Found	High	0.000955	0.01471	2.57
FALSE	High	[K].AVSPPHLDGPPSPR.[S]	1xPhospho [S3]; 1xTMT6plex [N-Term]	P29590 1xPhospho [S518]	0.018241	0.000295797	1	1	1	P29590	P29590 [516-529]	0	1735.87	0							No Quan Values	Not Found	Not Found	Not Found	Not Found	High	Not Found	Not Found	Not Found	Not Found	Not Found	Not Found	High	0.000144	0.001245	2.93
FALSE	High	[K].QDSLDIYNER.[D]	1xPhospho [S3]; 1xTMT6plex [N-Term]	Q9ULQ0 1xPhospho [S354]	0.00331554	0.000108793	1	1	1	Q9ULQ0	Q9ULQ0 [352-361]	0	1561.71	0							No Quan Values	Not Found	Not Found	Not Found	Not Found	Not Found	Not Found	Not Found	Not Found	Not Found	Not Found	High	High	3.165e-05	0.0001922	2.96
FALSE	High	[R].QELILSNSEDK.[S]	1xTMT6plex [K11]; 1xTMT6plex [N-Term]		0.00134492	0.000108793	1	1	1	P53621	P53621 [261-271]	0	1733.97	0							No Quan Values	Not Found	Not Found	Not Found	Not Found	Not Found	Not Found	Not Found	Not Found	Not Found	High	Not Found	High	3.165e-05	8.942e-05	3.19
FALSE	High	[K].IEVDEGFCSPKPSEIK.[D]	1xCarbamidomethyl [C8]; 1xPhospho [S9]; 2xTMT6plex [K11; K16]; 1xTMT6plex [N-Term]	Q9UHV7 1xPhospho [S890]	0.00278683	0.000108793	1	1	1	Q9UHV7	Q9UHV7 [882-897]	0	2602.34	0							No Quan Values	Not Found	Not Found	Not Found	Not Found	Not Found	High	Not Found	Not Found	Not Found	Not Found	Not Found	High	3.165e-05	0.0001641	3.03
FALSE	High	[R].LESLYSDEEDESAVGADK.[I]	1xTMT6plex [K18]; 1xTMT6plex [N-Term]		7.62673e-06	0	1	1	1	Q9UP95	Q9UP95 [962-979]	0	2415.18	0							No Quan Values	Not Found	Not Found	Not Found	Not Found	Not Found	Not Found	Not Found	Not Found	Not Found	High	Not Found	High	0	8.52e-07	4.02
FALSE	High	[K].QEEESLGQVTDQVEVNAQNSVPDEEAK.[T]	1xTMT6plex [K27]; 1xTMT6plex [N-Term]		5.50104e-11	0	1	1	1	Q05682	Q05682 [54-80]	0	3430.69	0							No Quan Values	Not Found	Not Found	Not Found	Not Found	Not Found	Not Found	Not Found	Not Found	Not Found	High	Not Found	High	0	1.465e-11	5.98
FALSE	High	[R].VASPSQGQVGSSSPK.[R]	1xPhospho [S]; 1xTMT6plex [K15]; 1xTMT6plex [N-Term]	Q99569 1xPhospho [S]	4.83689e-05	0	1	1	3	Q99569	Q99569 [325-339]	0	1954	0							No Quan Values	Not Found	Not Found	Not Found	Not Found	High	Not Found	Not Found	Not Found	Not Found	Not Found	Not Found	High	0	4.71e-06	3.5
FALSE	High	[R].ATTPADGEEPAPEAEALAAAR.[E]	1xPhospho [T]; 1xTMT6plex [N-Term]	Q96S44 1xPhospho [T]	1.64748e-07	0	1	1	4	Q96S44	Q96S44 [6-26]	0	2347.1	0							No Quan Values	High	Not Found	Not Found	Not Found	Not Found	Not Found	Not Found	Not Found	Not Found	Not Found	High	High	0	2.444e-08	4.84
FALSE	High	[R].QEELESTEVGVQGGAFEGTHMGPFVER.[G]	1xTMT6plex [N-Term]		7.78141e-06	0	1	1	1	Q9NZN4	Q9NZN4 [399-425]	0	3149.5	0							No Quan Values	Not Found	Not Found	Not Found	Not Found	Not Found	Not Found	Not Found	Not Found	Not Found	High	Not Found	High	0	8.646e-07	4.52
FALSE	High	[K].VASGVLSPPPAAPPPSSSSVPEAGGPPIKK.[Q]	1xPhospho [S7]; 2xTMT6plex [K29; K30]; 1xTMT6plex [N-Term]	Q8IXM2 1xPhospho [S110]	0.00866717	0.000108793	1	1	1	Q8IXM2	Q8IXM2 [104-133]	1	3545.96	0							No Quan Values	Not Found	Not Found	Not Found	Not Found	Not Found	Not Found	Not Found	High	Not Found	Not Found	Not Found	High	6.142e-05	0.0005143	4.69
FALSE	High	[K].ATTHEIMGPK.[K]	1xTMT6plex [K10]; 1xTMT6plex [N-Term]		0.174017	0.00689042	1	1	2	Q13492	Q13492 [29-38]	0	1542.87	0							No Quan Values	Not Found	Not Found	Not Found	Not Found	Not Found	Not Found	Not Found	Not Found	High	Not Found	Not Found	High	0.002669	0.04015	1.24
FALSE	High	[R].LEQGQAIDDLMPAQK.[-]	1xOxidation [M11]; 1xTMT6plex [K15]; 1xTMT6plex [N-Term]		0.00010726	0	1	1	1	P12277	P12277 [367-381]	0	2131.15	0							No Quan Values	Not Found	Not Found	Not Found	Not Found	Not Found	Not Found	Not Found	Not Found	Not Found	High	Not Found	High	0	9.78e-06	3.59
FALSE	High	[R].CDADADCMDGSDEEACGTGVR.[T]	3xCarbamidomethyl [C1; C7; C16]; 1xTMT6plex [N-Term]		2.44519e-07	0	1	1	1	Q07954	Q07954 [3632-3652]	0	2519.96	0							No Quan Values	Not Found	Not Found	Not Found	Not Found	Not Found	Not Found	Not Found	Not Found	Not Found	High	Not Found	High	0	3.515e-08	3.9
FALSE	High	[R].QEIESETTSEEQIQEEK.[S]	1xTMT6plex [K17]; 1xTMT6plex [N-Term]		3.04953e-07	0	1	1	1	P13611	P13611 [2108-2124]	0	2495.24	0							No Quan Values	Not Found	Not Found	Not Found	Not Found	Not Found	Not Found	Not Found	Not Found	Not Found	High	Not Found	High	0	4.31e-08	5.18
FALSE	High	[R].ATSPEAGGGGGALK.[A]	1xPhospho [S/T]; 1xTMT6plex [K14]; 1xTMT6plex [N-Term]	Q13233 1xPhospho [T/S]	0.00608718	0.000108793	1	1	2	Q13233	Q13233 [19-32]	0	1710.88	0							No Quan Values	Not Found	Not Found	Not Found	Not Found	High	Not Found	Not Found	Not Found	Not Found	Not Found	Not Found	High	6.142e-05	0.0006339	2.5
FALSE	High	[K].VDVDIPDVNIEGPDAK.[L]	1xTMT6plex [K16]; 1xTMT6plex [N-Term]		8.66093e-06	0	1	1	1	Q09666	Q09666 [4816-4831]	0	2154.17	0							No Quan Values	Not Found	Not Found	Not Found	Not Found	Not Found	Not Found	Not Found	Not Found	Not Found	High	Not Found	High	0	9.586e-07	4.35
FALSE	High	[R].QEEEMMAK.[E]	1xTMT6plex [K8]; 1xTMT6plex [N-Term]		0.0422903	0.000856746	1	1	1	P35579	P35579 [843-850]	0	1453.74	0							No Quan Values	Not Found	Not Found	Not Found	Not Found	Not Found	Not Found	Not Found	Not Found	Not Found	High	Not Found	High	0.0003161	0.004172	2.09
FALSE	High	[R].NVSTGDVNVEMNAAPGVDLTQLLNNMR.[S]	1xOxidation [M11]; 1xTMT6plex [N-Term]		0.000503192	0	1	1	1	P13645	P13645 [296-322]	0	3117.55	0							No Quan Values	Not Found	Not Found	Not Found	Not Found	Not Found	Not Found	Not Found	Not Found	Not Found	High	Not Found	High	0	3.922e-05	3.91
FALSE	High	[R].TVMDGGLESDGPNMTENGLEDESRPQR.[R]	1xPhospho [S9]; 1xTMT6plex [N-Term]	P51116 1xPhospho [S566]	5.68127e-06	0	1	1	2	P51116	P51116 [558-584]	0	3243.41	0							No Quan Values	Not Found	Not Found	High	Not Found	Not Found	Not Found	Not Found	Not Found	Not Found	Not Found	High	High	0	6.497e-07	4.85
FALSE	High	[K].TVFSPTLPAAR.[S]	1xPhospho [S/T]; 1xTMT6plex [N-Term]	Q7Z2W4 1xPhospho [S/T]	0.0123323	0.000209539	1	1	2	Q7Z2W4	Q7Z2W4 [375-385]	0	1468.78	0							No Quan Values	Not Found	Not Found	Not Found	Not Found	Not Found	High	Not Found	Not Found	Not Found	Not Found	Not Found	High	0.0001195	0.0008514	3.09
FALSE	High	[K].DDLADYGGYDGGYVQDYEDFM.[-]	1xTMT6plex [N-Term]		4.01035e-05	0	1	1	1	O75822	O75822 [238-258]	0	2637.08	0							No Quan Values	Not Found	Not Found	Not Found	Not Found	Not Found	Not Found	Not Found	Not Found	Not Found	High	Not Found	High	0	3.945e-06	3.33
FALSE	High	[R].DDILCPDCGKDI.[-]	2xCarbamidomethyl [C5; C8]; 1xTMT6plex [K10]; 1xTMT6plex [N-Term]		0.0054344	0.000108793	1	1	1	Q14192	Q14192 [268-279]	1	1878.93	0							No Quan Values	Not Found	Not Found	Not Found	Not Found	Not Found	Not Found	Not Found	Not Found	Not Found	High	Not Found	High	3.165e-05	0.0003096	3.21
FALSE	High	[K].QLDDKDEEINQQSQLVEK.[L]	2xTMT6plex [K5; K18]; 1xTMT6plex [N-Term]		0.000212267	0	1	1	1	P33176	P33176 [431-448]	1	2846.54	0							No Quan Values	Not Found	Not Found	Not Found	Not Found	Not Found	Not Found	Not Found	Not Found	Not Found	High	Not Found	High	0	1.824e-05	3.93
FALSE	High	[K].DDQLLDDGK.[T]	1xTMT6plex [K9]; 1xTMT6plex [N-Term]		0.123121	0.00362673	1	1	1	Q15370	Q15370 [47-55]	0	1476.79	0							No Quan Values	Not Found	Not Found	Not Found	Not Found	Not Found	Not Found	Not Found	Not Found	Not Found	High	Not Found	High	0.001309	0.02354	2.14
FALSE	High	[K].LGPQNFIDETSDIENLLK.[E]	1xPhospho [T/S]; 1xTMT6plex [K18]; 1xTMT6plex [N-Term]	Q14692 1xPhospho [S/T]	4.74322e-07	0	1	1	2	Q14692	Q14692 [629-646]	0	2584.33	0							No Quan Values	Not Found	Not Found	Not Found	Not Found	Not Found	High	Not Found	Not Found	Not Found	Not Found	Not Found	High	0	6.508e-08	4.57
FALSE	High	[R].ASTVSPGGYMVPK.[G]	1xPhospho [Y9]; 1xTMT6plex [K13]; 1xTMT6plex [N-Term]	Q5TGY3 1xPhospho [Y1068]	0.00204926	0.000108793	1	1	1	Q5TGY3	Q5TGY3 [1060-1072]	0	1831.94	0							No Quan Values	Not Found	Not Found	Not Found	Not Found	Not Found	Not Found	High	Not Found	Not Found	Not Found	Not Found	High	3.165e-05	0.0001261	2.68
FALSE	High	[R].ICSIYTQSGENSLVQEGSEASPIGK.[S]	1xCarbamidomethyl [C2]; 1xPhospho [S21]; 1xTMT6plex [K25]; 1xTMT6plex [N-Term]	Q9Y4W2 1xPhospho [S523]	1.52978e-05	0	1	1	1	Q9Y4W2	Q9Y4W2 [503-527]	0	3192.55	0							No Quan Values	Not Found	Not Found	Not Found	Not Found	Not Found	High	Not Found	Not Found	Not Found	Not Found	Not Found	High	0	1.623e-06	5
FALSE	High	[R].NYEASVDSLTFSVVTGPAPSQEAGTK.[A]	1xTMT6plex [K26]; 1xTMT6plex [N-Term]		1.7265e-07	0	1	1	1	P21980	P21980 [49-74]	0	3113.6	0							No Quan Values	Not Found	Not Found	Not Found	Not Found	Not Found	Not Found	Not Found	Not Found	Not Found	High	Not Found	High	0	2.545e-08	5.45
FALSE	High	[K].QLEEEQQALQK.[K]	1xTMT6plex [K11]; 1xTMT6plex [N-Term]		0.00190399	0.000108793	1	1	1	P07951	P07951 [38-48]	0	1802.01	0							No Quan Values	Not Found	Not Found	Not Found	Not Found	Not Found	Not Found	Not Found	Not Found	Not Found	High	Not Found	High	3.165e-05	0.0001189	3.09
FALSE	High	[R].QLEVYTSGGDPESVAGEYGR.[H]	1xTMT6plex [N-Term]		0.000163508	0	1	1	1	Q9Y262	Q9Y262 [243-262]	0	2343.13	0							No Quan Values	Not Found	Not Found	Not Found	Not Found	Not Found	Not Found	Not Found	Not Found	Not Found	High	Not Found	High	0	1.435e-05	3.86
FALSE	High	[R].QLHLEGASLELSDDDTESK.[T]	2xPhospho [S8; S12]; 1xTMT6plex [K19]; 1xTMT6plex [N-Term]	P35580 2xPhospho [S1952; S1956]	2.54409e-05	0	1	1	1	P35580	P35580 [1945-1963]	0	2705.24	0							No Quan Values	Not Found	Not Found	Not Found	High	Not Found	Not Found	Not Found	Not Found	Not Found	Not Found	Not Found	High	0	2.598e-06	4.72
FALSE	High	[R].QLLAEQVSSHITSSPLHSR.[S]	1xPhospho [S/T]; 1xTMT6plex [N-Term]	O14662 1xPhospho [S/T]	0.000163508	0	1	1	3	O14662	O14662 [22-40]	0	2399.23	0							No Quan Values	Not Found	Not Found	Not Found	Not Found	Not Found	Not Found	High	Not Found	Not Found	Not Found	Not Found	High	0	1.44e-05	3.85
FALSE	High	[K].IDDVIDSR.[V]	1xTMT6plex [N-Term]		0.0463122	0.000856746	0	1	1			0	1161.63	0							No Quan Values	Not Found	Not Found	Not Found	Not Found	Not Found	Not Found	Not Found	Not Found	Not Found	High	Not Found	High	0.0003161	0.0048	2.25
FALSE	High	[R].DEGAVISQISDISNR.[D]	1xTMT6plex [N-Term]		0.00124956	0.000108793	1	1	1	O75410	O75410 [485-499]	0	1832.96	0							No Quan Values	Not Found	Not Found	Not Found	Not Found	Not Found	Not Found	Not Found	Not Found	Not Found	High	Not Found	High	3.165e-05	8.414e-05	3.33
FALSE	High	[R].DENSVELTMAEGPYK.[I]	1xTMT6plex [K15]; 1xTMT6plex [N-Term]		1.88344e-07	0	1	1	1	Q14697	Q14697 [134-148]	0	2141.08	0							No Quan Values	Not Found	Not Found	Not Found	Not Found	Not Found	Not Found	Not Found	Not Found	Not Found	High	Not Found	High	0	2.759e-08	5.07
FALSE	High	[K].IAQEIASLSKEDVSK.[E]	1xPhospho [S9]; 2xTMT6plex [K10; K15]; 1xTMT6plex [N-Term]	Q15311 1xPhospho [S463]	6.23756e-05	0	1	1	1	Q15311	Q15311 [455-469]	1	2385.32	0							No Quan Values	Not Found	Not Found	Not Found	Not Found	Not Found	High	Not Found	Not Found	Not Found	Not Found	Not Found	High	0	5.931e-06	4.71
FALSE	High	[K].LAQANGWGVMVSHR.[S]	1xTMT6plex [N-Term]		0.00117658	0.000108793	1	1	1	P06733	P06733 [359-372]	0	1754.93	0							No Quan Values	High	Not Found	Not Found	Not Found	Not Found	Not Found	Not Found	Not Found	Not Found	Not Found	Not Found	High	3.165e-05	8.034e-05	1.83
FALSE	High	[R].LGTSESLPCTAEELSR.[S]	1xCarbamidomethyl [C9]; 1xPhospho [S6]; 1xTMT6plex [N-Term]	Q9BZL6 1xPhospho [S214]	0.000931065	0	1	1	1	Q9BZL6	Q9BZL6 [209-224]	0	2058.96	0							No Quan Values	Not Found	Not Found	High	Not Found	Not Found	Not Found	Not Found	Not Found	Not Found	Not Found	Not Found	High	0	6.65e-05	2.92
FALSE	High	[K].LHDSSGSQVGTGFK.[S]	1xPhospho [S4]; 1xTMT6plex [K14]; 1xTMT6plex [N-Term]	P49792 1xPhospho [S1832]	0.0347781	0.000484649	1	1	1	P49792	P49792 [1829-1842]	0	1957.98	0							No Quan Values	Not Found	Not Found	Not Found	Not Found	Not Found	High	Not Found	Not Found	Not Found	Not Found	Not Found	High	0.000216	0.00307	2.17
FALSE	High	[K].IAEQVASFQEEK.[S]	1xTMT6plex [K12]; 1xTMT6plex [N-Term]		0.000787715	0	1	1	1	P35221	P35221 [684-695]	0	1837.01	0							No Quan Values	Not Found	Not Found	Not Found	Not Found	Not Found	Not Found	Not Found	Not Found	Not Found	High	Not Found	High	0	5.765e-05	3.02
FALSE	High	[K].TQPYDVYDQVEFDVPVGSR.[G]	1xTMT6plex [N-Term]		4.17579e-06	0	1	1	1	O75306	O75306 [305-323]	0	2443.2	0							No Quan Values	Not Found	Not Found	Not Found	Not Found	Not Found	Not Found	Not Found	Not Found	Not Found	High	Not Found	High	0	4.868e-07	3.92
FALSE	High	[R].DFTSLENTVEER.[L]	1xTMT6plex [N-Term]		0.000782464	0	1	1	1	Q07065	Q07065 [229-240]	0	1668.83	0							No Quan Values	Not Found	Not Found	Not Found	Not Found	Not Found	Not Found	Not Found	Not Found	Not Found	High	Not Found	High	0	5.73e-05	3.17
FALSE	High	[K].TQLSPSIK.[R]	1xPhospho [S4]; 1xTMT6plex [K8]; 1xTMT6plex [N-Term]	Q8NFC6 1xPhospho [S3019]	0.0807841	0.00237242	1	1	1	Q8NFC6	Q8NFC6 [3016-3023]	0	1411.8	0							No Quan Values	Not Found	Not Found	Not Found	Not Found	Not Found	High	Not Found	Not Found	Not Found	Not Found	Not Found	High	0.0008192	0.01177	2.41
FALSE	High	[K].QLVAGNSPK.[K]	1xPhospho [S7]; 1xTMT6plex [K9]; 1xTMT6plex [N-Term]	Q96EU6 1xPhospho [S73]	0.0226884	0.000295797	1	1	1	Q96EU6	Q96EU6 [67-75]	0	1451.8	0							No Quan Values	Not Found	Not Found	Not Found	Not Found	Not Found	High	Not Found	Not Found	Not Found	Not Found	Not Found	High	0.0001658	0.001663	2.72
FALSE	High	[R].QLVEQVEQIQK.[E]	1xTMT6plex [K11]; 1xTMT6plex [N-Term]		0.000160258	0	1	1	1	Q9BVK6	Q9BVK6 [170-180]	0	1800.06	0							No Quan Values	Not Found	Not Found	Not Found	Not Found	Not Found	Not Found	Not Found	Not Found	Not Found	High	Not Found	High	0	1.407e-05	3.6
FALSE	High	[K].QMNMSPPPGNAGPVIMSIEEK.[M]	1xPhospho [S5]; 2xOxidation [M2; M4]; 1xTMT6plex [K21]; 1xTMT6plex [N-Term]	Q86U42 1xPhospho [S150]	5.87294e-05	0	1	1	1	Q86U42	Q86U42 [146-166]	0	2797.34	0							No Quan Values	Not Found	Not Found	Not Found	Not Found	High	Not Found	Not Found	Not Found	Not Found	Not Found	Not Found	High	0	5.628e-06	3.83
FALSE	High	[R].QLSESESSLEMDDER.[Y]	1xPhospho [S3]; 1xTMT6plex [N-Term]	Q16204 1xPhospho [S323]	5.06888e-05	0	1	1	2	Q16204	Q16204 [321-335]	0	2063.87	0							No Quan Values	High	Not Found	Not Found	Not Found	Not Found	Not Found	Not Found	Not Found	Not Found	Not Found	High	High	0	5.949e-06	3.95
FALSE	High	[R].TVHPNSPGIPYR.[T]	1xPhospho [S6]; 1xTMT6plex [N-Term]	Q8WUI4 1xPhospho [S109]	0.0680924	0.00175403	1	1	1	Q8WUI4	Q8WUI4 [104-115]	0	1646.83	0							No Quan Values	Not Found	Not Found	Not Found	Not Found	High	Not Found	Not Found	Not Found	Not Found	Not Found	Not Found	High	0.0005796	0.009008	3.04
FALSE	High	[R].TSQNSELNNMQDLVEDYK.[K]	1xTMT6plex [K18]; 1xTMT6plex [N-Term]		6.23934e-06	0	1	1	1	P35908	P35908 [248-265]	0	2586.28	0							No Quan Values	Not Found	Not Found	Not Found	Not Found	Not Found	Not Found	Not Found	Not Found	Not Found	High	Not Found	High	0	7.08e-07	3.6
FALSE	High	[R].QLAELETEDGMQESP.[-]	1xPhospho [T/S]; 1xTMT6plex [N-Term]	Q96QG7 1xPhospho [S/T]	0.00329347	0.000108793	1	1	2	Q96QG7	Q96QG7 [535-549]	0	1985.86	0							No Quan Values	High	Not Found	Not Found	Not Found	Not Found	Not Found	Not Found	Not Found	Not Found	Not Found	Not Found	High	0.0005341	0.008074	2.24
FALSE	High	[K].CSTAGSSPNSVSELSLASLTEK.[I]	1xCarbamidomethyl [C1]; 1xPhospho [S]; 1xTMT6plex [K22]; 1xTMT6plex [N-Term]	Q5M775 1xPhospho [S]	2.92801e-05	0	1	1	2	Q5M775	Q5M775 [355-376]	0	2763.35	0							No Quan Values	Not Found	Not Found	Not Found	Not Found	Not Found	High	Not Found	Not Found	Not Found	Not Found	Not Found	High	0	2.952e-06	4.36
FALSE	High	[K].LEAAIAEAEER.[G]	1xTMT6plex [N-Term]		3.28251e-07	0	1	1	1	P08729	P08729 [332-342]	0	1430.77	0							No Quan Values	Not Found	Not Found	Not Found	Not Found	Not Found	Not Found	Not Found	Not Found	Not Found	High	Not Found	High	0	4.618e-08	4.31
FALSE	High	[R].TTSSANNPNLMYQDECDR.[R]	1xCarbamidomethyl [C16]; 1xTMT6plex [N-Term]		0.000367428	0	1	1	1	Q92841	Q92841 [569-586]	0	2345.03	0							No Quan Values	Not Found	Not Found	Not Found	Not Found	Not Found	Not Found	Not Found	Not Found	Not Found	High	Not Found	High	0	2.985e-05	3.32
FALSE	High	[R].CTPGTGLGTSPALAGDEAASAADLDNR.[F]	1xCarbamidomethyl [C1]; 1xTMT6plex [N-Term]		1.3575e-09	0	1	1	1	P35568	P35568 [494-520]	0	2817.35	0							No Quan Values	Not Found	Not Found	Not Found	Not Found	Not Found	Not Found	Not Found	Not Found	Not Found	High	Not Found	High	0	2.851e-10	6.3
FALSE	High	[K].TTSQAHSLPLSPASTR.[Q]	1xPhospho [S11]; 1xTMT6plex [N-Term]	P19838 1xPhospho [S907]	0.0253796	0.000295797	1	1	1	P19838	P19838 [897-912]	0	1962.98	0							No Quan Values	Not Found	Not Found	Not Found	Not Found	High	Not Found	Not Found	Not Found	Not Found	Not Found	Not Found	High	0.0001658	0.001934	3.14
FALSE	High	[R].LDTGPQSLSGK.[S]	1xPhospho [S9]; 1xTMT6plex [K11]; 1xTMT6plex [N-Term]	P35269 1xPhospho [S433]	0.0744191	0.00192952	1	1	1	P35269	P35269 [425-435]	0	1640.87	0							No Quan Values	Not Found	Not Found	Not Found	Not Found	Not Found	High	Not Found	Not Found	Not Found	Not Found	Not Found	High	0.0007236	0.01038	2.68
FALSE	High	[R].DSDSEGER.[R]	2xPhospho [S2; S4]; 1xTMT6plex [N-Term]	Q96HP0 2xPhospho [S415; S417]	0.196468	0.00821321	1	1	1	Q96HP0	Q96HP0 [414-421]	0	1283.44	0							No Quan Values	Not Found	Not Found	Not Found	Not Found	Not Found	Not Found	Not Found	Not Found	Not Found	High	Not Found	Not Found	0.003271	0.04761	0.44
FALSE	High	[K].QAEDTISNASSQLSSPPTSPQSSPR.[K]	2xPhospho [S15; S19]; 1xTMT6plex [N-Term]	Q9Y4G8 2xPhospho [S1116; S1120]	2.96824e-06	0	1	1	1	Q9Y4G8	Q9Y4G8 [1102-1126]	0	2961.31	0							No Quan Values	Not Found	Not Found	High	Not Found	Not Found	Not Found	Not Found	Not Found	Not Found	Not Found	Not Found	High	0	3.543e-07	3.91
FALSE	High	[K].TTNSSLEEIMDK.[A]	1xPhospho [S5]; 1xTMT6plex [K12]; 1xTMT6plex [N-Term]	Q709C8 1xPhospho [S737]	0.152882	0.00523892	1	1	1	Q709C8	Q709C8 [733-744]	0	1905.93	0							No Quan Values	Not Found	Not Found	High	Not Found	Not Found	Not Found	Not Found	Not Found	Not Found	Not Found	Not Found	High	0.002006	0.03308	2.08
FALSE	High	[K].VEGDMQVPDLDIK.[G]	1xTMT6plex [K13]; 1xTMT6plex [N-Term]		0.000281149	0	1	1	1	Q09666	Q09666 [3898-3910]	0	1917.04	0							No Quan Values	Not Found	Not Found	Not Found	Not Found	Not Found	Not Found	Not Found	Not Found	Not Found	High	Not Found	High	0	2.339e-05	3.61
FALSE	High	[K].LDPFESSDPFSSSSVSSK.[G]	1xPhospho [S]; 1xTMT6plex [K18]; 1xTMT6plex [N-Term]	Q9UBC2 1xPhospho [S]	3.77592e-05	0	1	1	4	Q9UBC2	Q9UBC2 [702-719]	0	2441.15	0							No Quan Values	Not Found	Not Found	Not Found	Not Found	Not Found	High	Not Found	Not Found	Not Found	Not Found	Not Found	High	0	3.745e-06	3.95
FALSE	High	[K].QGVDDIEKFEDEGAGFEESSETGDYEEK.[A]	2xTMT6plex [K8; K28]; 1xTMT6plex [N-Term]		0.00109315	0.000108793	1	1	1	P46821	P46821 [918-945]	1	3826.79	0							No Quan Values	Not Found	Not Found	Not Found	Not Found	Not Found	Not Found	Not Found	Not Found	Not Found	High	Not Found	High	3.165e-05	7.587e-05	3.65
FALSE	High	[K].ASVSGPNSPSETR.[R]	2xPhospho [S4; S8]; 1xTMT6plex [N-Term]	O15344 2xPhospho [S92; S96]	0.00655065	0.000108793	1	1	1	O15344	O15344 [89-101]	0	1677.71	0							No Quan Values	Not Found	Not Found	Not Found	Not Found	Not Found	Not Found	Not Found	Not Found	Not Found	Not Found	High	High	3.165e-05	0.0003776	2.93
FALSE	High	[K].QHYLSSEDEPDDNPDVLDSR.[I]	1xPhospho [S]; 1xTMT6plex [N-Term]	Q8NFC6 1xPhospho [S]	0.00743549	0.000108793	1	1	2	Q8NFC6	Q8NFC6 [2775-2794]	0	2640.13	0							No Quan Values	Not Found	Not Found	Not Found	Not Found	Not Found	Not Found	Not Found	Not Found	Not Found	Not Found	High	High	3.165e-05	0.0004343	2.2
FALSE	High	[R].QKDYETATLSEIK.[A]	2xTMT6plex [K2; K13]; 1xTMT6plex [N-Term]		8.21144e-07	0	1	1	1	P12814	P12814 [419-431]	1	2213.26	0							No Quan Values	Not Found	Not Found	Not Found	Not Found	Not Found	Not Found	Not Found	Not Found	Not Found	High	Not Found	High	0	1.077e-07	3.67
FALSE	High	[K].TSVLGGGEDGIEPVSPPEGMTEPGHSR.[S]	1xPhospho [S15]; 1xOxidation [M20]; 1xTMT6plex [N-Term]	Q9Y618 1xPhospho [S2223]	0.0226884	0.000295797	1	1	1	Q9Y618	Q9Y618 [2209-2235]	0	3017.38	0							No Quan Values	Not Found	Not Found	Not Found	Not Found	Not Found	Not Found	Not Found	Not Found	Not Found	Not Found	High	High	0.0001658	0.001654	2.65
FALSE	High	[R].DATNRSPTQIVK.[M]	1xPhospho [T/S]; 1xTMT6plex [K12]; 1xTMT6plex [N-Term]	A7KAX9 1xPhospho [S/T]	0.0262291	0.000295797	1	1	2	A7KAX9	A7KAX9 [947-958]	1	1868	0							No Quan Values	Not Found	Not Found	Not Found	Not Found	High	Not Found	Not Found	Not Found	Not Found	Not Found	Not Found	High	0.0001658	0.002031	2.61
FALSE	High	[R].LGNAGDVCVPQASPR.[R]	1xCarbamidomethyl [C8]; 1xPhospho [S13]; 1xTMT6plex [N-Term]	Q9H0W5 1xPhospho [S261]	0.00908085	0.000209539	1	1	1	Q9H0W5	Q9H0W5 [249-263]	0	1849.88	0							No Quan Values	Not Found	Not Found	Not Found	Not Found	High	Not Found	Not Found	Not Found	Not Found	Not Found	Not Found	High	6.142e-05	0.0005394	2.52
FALSE	High	[R].QAASSLQQASLK.[L]	1xTMT6plex [K12]; 1xTMT6plex [N-Term]		0.0248829	0.000295797	1	1	1	P38646	P38646 [635-646]	0	1689.99	0							No Quan Values	Not Found	Not Found	Not Found	Not Found	Not Found	Not Found	Not Found	High	Not Found	Not Found	Not Found	High	0.0001658	0.001879	1.42
FALSE	High	[R].QAAPCVLFFDELDSIAK.[A]	1xCarbamidomethyl [C5]; 1xTMT6plex [K17]; 1xTMT6plex [N-Term]		1.2599e-05	0	1	1	1	P55072	P55072 [568-584]	0	2382.28	0							No Quan Values	Not Found	Not Found	Not Found	Not Found	Not Found	Not Found	Not Found	High	Not Found	Not Found	Not Found	High	0	1.351e-06	3.61
FALSE	High	[R].TSSTNEDEDLNPEQK.[I]	1xPhospho [S3]; 1xTMT6plex [K15]; 1xTMT6plex [N-Term]	Q99081 1xPhospho [S559]	0.0359332	0.000484649	1	1	1	Q99081	Q99081 [557-571]	0	2245.03	0							No Quan Values	High	Not Found	Not Found	Not Found	Not Found	Not Found	Not Found	Not Found	Not Found	Not Found	Not Found	High	0.000216	0.003238	2.85
FALSE	High	[K].IDGDKDGFVTVDELK.[D]	2xTMT6plex [K5; K15]; 1xTMT6plex [N-Term]		6.49313e-05	0	1	1	1	O43852	O43852 [80-94]	1	2338.31	0							No Quan Values	Not Found	Not Found	Not Found	Not Found	Not Found	Not Found	Not Found	Not Found	Not Found	High	Not Found	High	0	6.177e-06	4.47
FALSE	High	[K].QKSEEPSVSIPFLQTALLR.[S]	1xPhospho [S3]; 1xTMT6plex [K2]; 1xTMT6plex [N-Term]	Q5SW79 1xPhospho [S446]	2.16767e-07	0	1	1	1	Q5SW79	Q5SW79 [444-462]	1	2681.47	0							No Quan Values	Not Found	Not Found	Not Found	Not Found	Not Found	Not Found	Not Found	High	Not Found	Not Found	Not Found	High	0	3.142e-08	5.97
FALSE	High	[K].IDFDSVSSIMASSQ.[-]	1xPhospho [S13]; 1xTMT6plex [N-Term]	Q9UBQ5 1xPhospho [S217]	0.000648829	0	1	1	1	Q9UBQ5	Q9UBQ5 [205-218]	0	1795.8	0							No Quan Values	Not Found	Not Found	Not Found	Not Found	Not Found	High	Not Found	Not Found	Not Found	Not Found	Not Found	High	0	4.895e-05	3.39
FALSE	High	[K].IDFDSVSSIMASSQ.[-]	1xTMT6plex [N-Term]		0.00113031	0.000108793	1	1	1	Q9UBQ5	Q9UBQ5 [205-218]	0	1715.84	0							No Quan Values	Not Found	Not Found	Not Found	Not Found	Not Found	Not Found	Not Found	Not Found	Not Found	High	Not Found	High	3.165e-05	7.792e-05	2.8
FALSE	High	[R].QLACDQVQDPVCDTDHMEHNNLCTLYQR.[G]	3xCarbamidomethyl [C4; C12; C23]; 1xTMT6plex [N-Term]		4.525e-06	0	1	1	1	O95980	O95980 [713-740]	0	3689.64	0							No Quan Values	Not Found	Not Found	Not Found	Not Found	Not Found	Not Found	Not Found	Not Found	Not Found	High	Not Found	High	0	5.247e-07	4.03
FALSE	High	[R].QAEATRASPPR.[S]	1xPhospho [S8]; 1xTMT6plex [N-Term]	Q5T0Z8 1xPhospho [S275]	0.0672311	0.00175403	1	1	1	Q5T0Z8	Q5T0Z8 [268-278]	1	1492.75	0							No Quan Values	Not Found	Not Found	Not Found	Not Found	Not Found	Not Found	Not Found	Not Found	Not Found	Not Found	High	High	0.0005796	0.008781	2.42
FALSE	High	[K].DAGEGGLSLAVEGPSK.[A]	1xTMT6plex [K16]; 1xTMT6plex [N-Term]		1.37512e-07	0	1	1	1	Q14315	Q14315 [1886-1901]	0	1945.06	0							No Quan Values	Not Found	Not Found	Not Found	Not Found	Not Found	Not Found	Not Found	Not Found	Not Found	High	Not Found	High	0	2.065e-08	3.99
FALSE	High	[R].YYTSASGDEMVSLK.[D]	1xTMT6plex [K14]; 1xTMT6plex [N-Term]		0.0323626	0.000389981	1	1	1	P07900	P07900 [465-478]	0	2009.03	0							No Quan Values	Not Found	Not Found	Not Found	Not Found	Not Found	Not Found	Not Found	Not Found	Not Found	High	Not Found	High	0.0001904	0.002747	2.21
FALSE	High	[K].DSGHGDSEQGDSDHDATNR.[A]	1xTMT6plex [N-Term]		2.81419e-07	0	1	1	1	Q9P2E7	Q9P2E7 [910-928]	0	2228.92	0							No Quan Values	Not Found	Not Found	Not Found	Not Found	Not Found	Not Found	Not Found	Not Found	Not Found	High	Not Found	High	0	4.008e-08	4.25
FALSE	High	[K].EQDDTAAMLADFIDCPPDDEKPPPPTEPDS.[-]	1xCarbamidomethyl [C15]; 1xTMT6plex [K21]; 1xTMT6plex [N-Term]		2.94767e-05	0	1	1	1	Q8IZL8	Q8IZL8 [1101-1130]	0	3771.73	0							No Quan Values	Not Found	Not Found	Not Found	Not Found	Not Found	Not Found	Not Found	Not Found	Not Found	High	Not Found	High	0	2.971e-06	4.48
FALSE	High	[K].SEQDQAENEGEDSAVLMER.[L]	1xOxidation [M17]; 1xTMT6plex [N-Term]		0.0038404	0.000108793	1	2	1	Q99613	Q99613 [532-550]	0	2382.06	0							No Quan Values	Not Found	Not Found	Not Found	Not Found	Not Found	Not Found	Not Found	Not Found	Not Found	High	Not Found	High	3.165e-05	0.0002209	2.61
FALSE	High	[K].SEQEEYEAEGIAWEPVQYFNNK.[I]	1xTMT6plex [K22]; 1xTMT6plex [N-Term]		7.28303e-09	0	1	1	1	O00159	O00159 [456-477]	0	3118.5	0							No Quan Values	Not Found	Not Found	Not Found	Not Found	Not Found	Not Found	Not Found	Not Found	Not Found	High	Not Found	High	0	1.355e-09	6.32
FALSE	High	[K].SERDTPAAVTAEGSGK.[Y]	1xPhospho [S/T]; 1xTMT6plex [K16]; 1xTMT6plex [N-Term]	Q86UP3 1xPhospho [T/S]	0.00243818	0.000108793	1	1	2	Q86UP3	Q86UP3 [1259-1274]	1	2114.05	0							No Quan Values	Not Found	Not Found	High	Not Found	Not Found	Not Found	Not Found	Not Found	Not Found	Not Found	Not Found	High	3.165e-05	0.0001461	3.26
FALSE	High	[R].GNAAGSSQTGDALGK.[A]	1xPhospho [S]; 1xTMT6plex [K15]; 1xTMT6plex [N-Term]	Q99081 1xPhospho [S]	0.000793001	0	1	1	2	Q99081	Q99081 [327-341]	0	1871.93	0							No Quan Values	Not Found	Not Found	Not Found	Not Found	High	Not Found	Not Found	Not Found	Not Found	Not Found	Not Found	High	3.165e-05	8.459e-05	2.77
FALSE	High	[R].SESAPTLHPYSPLSPK.[G]	1xPhospho [S14]; 1xTMT6plex [K16]; 1xTMT6plex [N-Term]	Q8WUF5 1xPhospho [S113]	0.0120087	0.000209539	1	1	1	Q8WUF5	Q8WUF5 [100-115]	0	2249.16	0							No Quan Values	Not Found	Not Found	Not Found	Not Found	Not Found	High	Not Found	Not Found	Not Found	Not Found	Not Found	High	0.0001195	0.0007441	3.51
FALSE	High	[K].EQHNVSPR.[D]	1xTMT6plex [N-Term]		0.0313195	0.000389981	1	1	1	P50443	P50443 [7-14]	0	1195.64	0							No Quan Values	Not Found	Not Found	High	Not Found	Not Found	Not Found	Not Found	Not Found	Not Found	Not Found	Not Found	High	0.0001904	0.002635	1.64
FALSE	High	[K].GLVSPQSPQK.[S]	1xPhospho [S7]; 1xTMT6plex [K10]; 1xTMT6plex [N-Term]	P41182 1xPhospho [S333]	0.00964169	0.000209539	1	1	2	P41182	P41182 [327-336]	0	1578.87	0							No Quan Values	Not Found	Not Found	Not Found	Not Found	Not Found	High	High	Not Found	Not Found	Not Found	Not Found	High	6.142e-05	0.0005789	2.71
FALSE	High	[K].SQDVAVSPQQQQCSK.[S]	1xCarbamidomethyl [C13]; 1xPhospho [S7]; 1xTMT6plex [K15]; 1xTMT6plex [N-Term]	Q96F86 1xPhospho [S131]	0.000203913	0	1	1	2	Q96F86	Q96F86 [125-139]	0	2228.08	0							No Quan Values	Not Found	Not Found	Not Found	High	High	Not Found	Not Found	Not Found	Not Found	Not Found	Not Found	High	0	1.756e-05	4.17
FALSE	High	[R].SESPEPGYVVTSSGLLLPVLLPR.[L]	1xPhospho [S]; 1xTMT6plex [N-Term]	Q96Q42 1xPhospho [S]	9.84266e-09	0	1	1	2	Q96Q42	Q96Q42 [1462-1484]	0	2719.45	0							No Quan Values	Not Found	Not Found	Not Found	Not Found	Not Found	Not Found	High	Not Found	Not Found	Not Found	Not Found	High	0	1.79e-09	6.39
FALSE	High	[K].SESQMDITDINTPKPK.[K]	1xPhospho [S/T]; 1xOxidation [M5]; 2xTMT6plex [K14; K16]; 1xTMT6plex [N-Term]	P08473 1xPhospho [T/S]	0.00144755	0.000108793	1	1	2	P08473	P08473 [4-19]	0	2587.33	0							No Quan Values	Not Found	Not Found	Not Found	Not Found	High	Not Found	Not Found	Not Found	Not Found	Not Found	Not Found	High	3.165e-05	9.489e-05	2.91
FALSE	High	[K].SPVREPIDNLTPEER.[D]	1xPhospho [S1]; 1xTMT6plex [N-Term]	Q14498 1xPhospho [S136]	0.0307094	0.000389981	1	1	1	Q14498	Q14498 [136-150]	1	2061.02	0							No Quan Values	High	Not Found	Not Found	Not Found	Not Found	Not Found	Not Found	Not Found	Not Found	Not Found	Not Found	High	0.0001904	0.002561	2.46
FALSE	High	[K].GLQVGGCEPEPQVC.[-]	2xCarbamidomethyl [C7; C14]; 1xTMT6plex [N-Term]		0.0301109	0.000295797	1	1	1	P52888	P52888 [676-689]	0	1758.84	0							No Quan Values	Not Found	Not Found	Not Found	Not Found	Not Found	Not Found	Not Found	Not Found	Not Found	High	Not Found	High	0.0001658	0.00248	2.21
FALSE	High	[K].SETIQDTDTQSLVGSPSTR.[I]	1xPhospho [S]; 1xTMT6plex [N-Term]	Q9NZN5 1xPhospho [S]	0.00116874	0.000108793	1	1	3	Q9NZN5	Q9NZN5 [327-345]	0	2331.09	0							No Quan Values	Not Found	High	Not Found	Not Found	Not Found	Not Found	Not Found	Not Found	Not Found	Not Found	Not Found	High	3.165e-05	7.976e-05	3.39
FALSE	High	[K].GLPSPYNMSSAPGSR.[S]	1xPhospho [S]; 1xTMT6plex [N-Term]	P15924 1xPhospho [S]	0.038607	0.00057911	1	1	3	P15924	P15924 [2812-2826]	0	1829.85	0							No Quan Values	Not Found	Not Found	Not Found	Not Found	Not Found	High	Not Found	Not Found	Not Found	Not Found	Not Found	High	0.0005796	0.008509	2.57
FALSE	High	[K].GLNVIGASDQSPLQSPSNLR.[D]	1xPhospho [S11]; 1xTMT6plex [N-Term]	Q9HAU0 1xPhospho [S933]	1.58184e-05	0	1	1	1	Q9HAU0	Q9HAU0 [923-942]	0	2362.2	0							No Quan Values	Not Found	Not Found	Not Found	Not Found	Not Found	High	Not Found	Not Found	Not Found	Not Found	Not Found	High	0	1.677e-06	4.38
FALSE	High	[K].ESAAPASPAPSPAPSPTPAPPQK.[E]	1xPhospho [S7]; 1xTMT6plex [K23]; 1xTMT6plex [N-Term]	Q3KQU3 1xPhospho [S544]	4.74322e-07	0	1	1	1	Q3KQU3	Q3KQU3 [538-560]	0	2691.38	0							No Quan Values	Not Found	Not Found	Not Found	Not Found	High	Not Found	Not Found	Not Found	Not Found	Not Found	Not Found	High	0	6.492e-08	4.64
FALSE	High	[R].ESAASGLGGLLEEEGAGAGAAQEEVLEPGR.[D]	1xPhospho [S]; 1xTMT6plex [N-Term]	Q9C0C2 1xPhospho [S]	0.000259457	0	1	1	2	Q9C0C2	Q9C0C2 [1472-1501]	0	3163.5	0							No Quan Values	Not Found	Not Found	Not Found	Not Found	Not Found	Not Found	Not Found	Not Found	Not Found	Not Found	High	High	0	2.182e-05	4.28
FALSE	High	[K].SFFDNISCDDNR.[E]	1xCarbamidomethyl [C8]; 1xTMT6plex [N-Term]		0.00116095	0.000108793	1	1	1	Q8ND56	Q8ND56 [368-379]	0	1718.76	0							No Quan Values	Not Found	Not Found	Not Found	Not Found	Not Found	Not Found	Not Found	Not Found	Not Found	High	Not Found	High	3.165e-05	7.937e-05	2.75
FALSE	High	[K].SFQEILQIVSPVR.[D]	1xPhospho [S10]; 1xTMT6plex [N-Term]	Q7Z3U7 1xPhospho [S1177]	0.0111618	0.000209539	1	1	1	Q7Z3U7	Q7Z3U7 [1168-1180]	0	1824.98	0							No Quan Values	Not Found	Not Found	Not Found	Not Found	Not Found	Not Found	High	Not Found	Not Found	Not Found	Not Found	High	6.142e-05	0.0006833	2.78
FALSE	High	[K].ESEVLIGNLGDK.[L]	1xTMT6plex [K12]; 1xTMT6plex [N-Term]		0.000341357	0	1	1	1	Q96A65	Q96A65 [682-693]	0	1731.99	0							No Quan Values	Not Found	Not Found	Not Found	Not Found	Not Found	Not Found	Not Found	Not Found	Not Found	High	Not Found	High	0	2.793e-05	3.26
FALSE	High	[K].ESFEGQMTEDNIEVGICNEAGFR.[R]	1xCarbamidomethyl [C17]; 1xTMT6plex [N-Term]		1.04486e-06	0	1	1	1	P25787	P25787 [197-219]	0	2861.29	0							No Quan Values	Not Found	Not Found	Not Found	Not Found	Not Found	Not Found	Not Found	Not Found	Not Found	High	Not Found	High	0	1.346e-07	4.18
FALSE	High	[R].ESISPQPADSACSSPAPSTGK.[V]	1xCarbamidomethyl [C12]; 2xPhospho [S4; S10]; 1xTMT6plex [K21]; 1xTMT6plex [N-Term]	Q9GZR1 2xPhospho [S352; S358]	0.00019986	0	1	1	1	Q9GZR1	Q9GZR1 [349-369]	0	2692.2	0							No Quan Values	Not Found	Not Found	High	Not Found	Not Found	Not Found	Not Found	Not Found	Not Found	Not Found	Not Found	High	0	1.724e-05	3.65
FALSE	High	[K].GLEDNQGGQYESWNYYR.[Y]	1xTMT6plex [N-Term]		0.019233	0.000295797	1	1	1	Q8IXB1	Q8IXB1 [103-119]	0	2308.05	0							No Quan Values	Not Found	Not Found	Not Found	Not Found	Not Found	Not Found	Not Found	Not Found	Not Found	High	Not Found	High	0.000144	0.001329	2.32
FALSE	High	[R].ESPEGSYTDDANQEVR.[G]	1xPhospho [S2]; 1xTMT6plex [N-Term]	Q5T0N5 1xPhospho [S501]	0.171997	0.0064857	1	1	1	Q5T0N5	Q5T0N5 [500-515]	0	2105.89	0							No Quan Values	High	Not Found	Not Found	Not Found	Not Found	Not Found	Not Found	Not Found	Not Found	Not Found	Not Found	High	0.002535	0.03942	1.72
FALSE	High	[R].GLDSSSTAPSALGER.[G]	1xPhospho [S10]; 1xTMT6plex [N-Term]	O15534 1xPhospho [S815]	0.00258933	0.000108793	1	1	1	O15534	O15534 [806-820]	0	1756.83	0							No Quan Values	Not Found	Not Found	High	Not Found	Not Found	Not Found	Not Found	Not Found	Not Found	Not Found	Not Found	High	3.165e-05	0.0001541	2.46
FALSE	High	[K].ESQLFDPSDLQDTSNR.[V]	1xTMT6plex [N-Term]		0.00282433	0.000108793	1	1	1	Q9UPQ0	Q9UPQ0 [96-111]	0	2081	0							No Quan Values	Not Found	Not Found	Not Found	Not Found	Not Found	Not Found	Not Found	Not Found	Not Found	High	Not Found	High	3.165e-05	0.0001663	3.3
FALSE	High	[R].SGDETPGSEVPGDK.[A]	1xTMT6plex [K14]; 1xTMT6plex [N-Term]		0.00331554	0.000108793	1	1	1	Q1KMD3	Q1KMD3 [161-174]	0	1832.93	0							No Quan Values	Not Found	Not Found	Not Found	Not Found	Not Found	Not Found	Not Found	Not Found	Not Found	High	Not Found	High	3.165e-05	0.0001926	3.22
FALSE	High	[R].SGDETPGSEVPGDK.[A]	2xPhospho [S1; S8]; 1xTMT6plex [K14]; 1xTMT6plex [N-Term]	Q1KMD3 2xPhospho [S161; S168]	0.0161901	0.000295797	1	1	1	Q1KMD3	Q1KMD3 [161-174]	0	1992.86	0							No Quan Values	Not Found	Not Found	Not Found	Not Found	Not Found	Not Found	Not Found	Not Found	Not Found	Not Found	High	High	0.000144	0.001067	3.06
FALSE	High	[R].SQLDDHPESDDEENFIDANDDEDMEK.[F]	1xPhospho [S9]; 1xOxidation [M24]; 1xTMT6plex [K26]; 1xTMT6plex [N-Term]	Q03701 1xPhospho [S629]	0.00444815	0.000108793	1	1	2	Q03701	Q03701 [621-646]	0	3606.46	0							No Quan Values	High	Not Found	Not Found	Not Found	Not Found	Not Found	Not Found	Not Found	Not Found	Not Found	High	High	3.165e-05	0.000253	4.46
FALSE	High	[R].SQMYSTDYDQILPDCYSWPEEVQK.[I]	1xCarbamidomethyl [C15]; 1xTMT6plex [K24]; 1xTMT6plex [N-Term]		2.90924e-06	0	1	1	1	P48163	P48163 [542-565]	0	3440.61	0							No Quan Values	Not Found	Not Found	Not Found	Not Found	Not Found	Not Found	Not Found	Not Found	Not Found	High	Not Found	High	0	3.497e-07	4.64
FALSE	High	[R].GNSDGYIIPINK.[E]	1xPhospho [S3]; 1xTMT6plex [K12]; 1xTMT6plex [N-Term]	O95490 1xPhospho [S1430]	0.00511758	0.000108793	1	1	1	O95490	O95490 [1428-1439]	0	1828.96	0							No Quan Values	Not Found	Not Found	Not Found	Not Found	Not Found	High	Not Found	Not Found	Not Found	Not Found	Not Found	High	3.165e-05	0.0002917	3.76
FALSE	High	[R].SEPDDSDPFSFDGPEIMGCTGCQIDWK.[K]	2xCarbamidomethyl [C19; C22]; 1xOxidation [M17]; 1xTMT6plex [K27]; 1xTMT6plex [N-Term]		0.0921485	0.0025315	1	1	1	P55209	P55209 [237-263]	0	3564.56	0							No Quan Values	Not Found	Not Found	Not Found	Not Found	Not Found	Not Found	Not Found	Not Found	Not Found	High	Not Found	High	0.000955	0.01456	2.93
FALSE	High	[K].SSGFLNLIK.[S]	1xPhospho [S1]; 1xTMT6plex [K9]; 1xTMT6plex [N-Term]	Q5VZK9 1xPhospho [S1067]	0.0792716	0.00219213	1	1	1	Q5VZK9	Q5VZK9 [1067-1075]	0	1516.85	0							No Quan Values	Not Found	Not Found	Not Found	Not Found	Not Found	Not Found	Not Found	High	Not Found	Not Found	Not Found	High	0.000771	0.01142	2.34
FALSE	High	[K].ELQELEPENK.[W]	1xTMT6plex [K10]; 1xTMT6plex [N-Term]		0.0694039	0.00175403	1	1	1	Q92696	Q92696 [373-382]	0	1686.93	0							No Quan Values	Not Found	Not Found	Not Found	Not Found	Not Found	Not Found	Not Found	Not Found	Not Found	High	Not Found	High	0.0005796	0.009248	2.42
FALSE	High	[K].SSGFAFDPSVNYSK.[V]	1xPhospho [S]; 1xTMT6plex [K14]; 1xTMT6plex [N-Term]	Q8IYM9 1xPhospho [S]	0.00547079	0.000108793	1	1	2	Q8IYM9	Q8IYM9 [383-396]	0	2043.98	0							No Quan Values	Not Found	Not Found	Not Found	Not Found	Not Found	Not Found	High	Not Found	Not Found	Not Found	Not Found	High	3.165e-05	0.0003657	3.11
FALSE	High	[R].SCDVEPNDTVDALYNR.[F]	1xCarbamidomethyl [C2]; 1xTMT6plex [N-Term]		5.75783e-06	0	1	1	1	Q3SY69	Q3SY69 [173-188]	0	2096.98	0							No Quan Values	Not Found	Not Found	Not Found	Not Found	Not Found	Not Found	Not Found	Not Found	Not Found	High	Not Found	High	0	6.551e-07	4.01
FALSE	High	[K].SSGAPQDSDSSATCSADEVDEAEGGDK.[N]	1xCarbamidomethyl [C14]; 1xPhospho [S/T]; 1xTMT6plex [K27]; 1xTMT6plex [N-Term]	Q9Y618 1xPhospho [S/T]	2.63135e-06	0	1	1	2	Q9Y618	Q9Y618 [908-934]	0	3210.33	0							No Quan Values	Not Found	Not Found	Not Found	Not Found	Not Found	Not Found	Not Found	Not Found	Not Found	Not Found	High	High	0	3.182e-07	3.84
FALSE	High	[K].ELQQELQEYEVVTESEK.[R]	1xTMT6plex [K17]; 1xTMT6plex [N-Term]		7.227e-05	0	1	1	1	Q96A49	Q96A49 [319-335]	0	2539.32	0							No Quan Values	Not Found	Not Found	Not Found	Not Found	Not Found	Not Found	Not Found	Not Found	Not Found	High	Not Found	High	0	6.8e-06	4.4
FALSE	High	[K].ELSDLEEENR.[V]	1xTMT6plex [N-Term]		2.794e-05	0	1	1	1	Q5M775	Q5M775 [239-248]	0	1462.72	0							No Quan Values	Not Found	Not Found	Not Found	Not Found	Not Found	Not Found	Not Found	Not Found	Not Found	High	Not Found	High	0	2.83e-06	3.56
FALSE	High	[R].ELSEPMEFQYLPDTDDR.[H]	1xTMT6plex [N-Term]		1.46013e-06	0	1	1	1	Q04206	Q04206 [279-295]	0	2314.07	0							No Quan Values	Not Found	Not Found	Not Found	Not Found	Not Found	Not Found	Not Found	Not Found	Not Found	High	Not Found	High	0	1.845e-07	4.3
FALSE	High	[R].ELSGLR.[T]	1xPhospho [S3]; 1xTMT6plex [N-Term]		0.138117	0.00474234	0	1	2			0	983.512	0							No Quan Values	Not Found	High	High	Not Found	Not Found	Not Found	Not Found	Not Found	Not Found	Not Found	Not Found	High	0.001743	0.02831	1.83
FALSE	High	[R].GQKPPPTPSGK.[L]	1xPhospho [T7]; 2xTMT6plex [K3; K11]; 1xTMT6plex [N-Term]	Q9Y4F1 1xPhospho [T34]	0.0138067	0.000209539	1	1	2	Q9Y4F1	Q9Y4F1 [28-38]	0	1861.06	0							No Quan Values	Not Found	Not Found	Not Found	Not Found	Not Found	Not Found	High	Not Found	Not Found	Not Found	Not Found	High	0.0001195	0.0008835	2.85
FALSE	High	[K].EITALAPSTMK.[I]	1xPhospho [S8]; 1xOxidation [M10]; 1xTMT6plex [K11]; 1xTMT6plex [N-Term]	P60709 1xPhospho [S323]; P68032 1xPhospho [S325]	0.139786	0.00474234	2	6	1	P60709; P68032	P60709 [316-326]; P68032 [318-328]	0	1715.91	0							No Quan Values	Not Found	Not Found	Not Found	Not Found	High	Not Found	Not Found	Not Found	Not Found	Not Found	Not Found	High	0.001811	0.02899	2.53
FALSE	High	[K].ELVEFAQDDDR.[L]	1xTMT6plex [N-Term]		0.000113919	0	1	1	1	Q14677	Q14677 [134-144]	0	1565.76	0							No Quan Values	Not Found	Not Found	Not Found	Not Found	Not Found	Not Found	Not Found	Not Found	Not Found	High	Not Found	High	0	1.035e-05	2.99
FALSE	High	[R].GQDVVQEWQETSPTR.[E]	1xPhospho [T/S]; 1xTMT6plex [N-Term]	P78559 1xPhospho [T/S]	0.00466098	0.000108793	1	1	5	P78559	P78559 [1643-1657]	0	2068.95	0							No Quan Values	Not Found	High	High	Not Found	Not Found	Not Found	Not Found	Not Found	Not Found	Not Found	Not Found	High	3.165e-05	0.0002665	2.4
FALSE	High	[K].SRTPVQDHR.[S]	1xPhospho [T3]; 1xTMT6plex [N-Term]	P46821 1xPhospho [T1633]	0.0112362	0.000209539	1	1	3	P46821	P46821 [1631-1639]	1	1404.69	0							No Quan Values	High	Not Found	High	Not Found	Not Found	Not Found	Not Found	Not Found	Not Found	Not Found	High	High	6.142e-05	0.000691	2.87
FALSE	High	[R].SPSDSSTASTPVAEQIER.[A]	2xPhospho [S5; S6]; 1xTMT6plex [N-Term]	Q16643 2xPhospho [S341; S342]	0.000209445	0	1	1	1	Q16643	Q16643 [337-354]	0	2250.97	0							No Quan Values	Not Found	Not Found	Not Found	Not Found	Not Found	Not Found	Not Found	Not Found	Not Found	Not Found	High	High	0	1.793e-05	4.01
FALSE	High	[K].ELVNDDEDIDWVQTEK.[H]	1xTMT6plex [K16]; 1xTMT6plex [N-Term]		4.23207e-06	0	1	1	1	P41743	P41743 [288-303]	0	2406.21	0							No Quan Values	Not Found	Not Found	Not Found	Not Found	Not Found	Not Found	Not Found	Not Found	Not Found	High	Not Found	High	0	4.939e-07	4.45
FALSE	High	[R].SDRGSGQGDSLYPVGYLDK.[Q]	1xPhospho [S5]; 1xTMT6plex [K19]; 1xTMT6plex [N-Term]	Q5J8M3 1xPhospho [S36]	0.177085	0.00689042	1	1	1	Q5J8M3	Q5J8M3 [32-50]	1	2552.24	0							No Quan Values	Not Found	Not Found	Not Found	Not Found	High	Not Found	Not Found	Not Found	Not Found	Not Found	Not Found	High	0.002733	0.04122	2.94
FALSE	High	[R].EMEEELVPTGSEPGDTR.[A]	1xTMT6plex [N-Term]		0.00131821	0.000108793	1	1	1	Q9C0C2	Q9C0C2 [19-35]	0	2104.99	0							No Quan Values	Not Found	Not Found	Not Found	Not Found	Not Found	Not Found	Not Found	Not Found	Not Found	High	Not Found	High	3.165e-05	8.828e-05	3.13
FALSE	High	[K].SDSPESDAEREK.[D]	1xPhospho [S6]; 1xTMT6plex [K12]; 1xTMT6plex [N-Term]	O75400 1xPhospho [S888]	0.0587882	0.00130733	1	1	1	O75400	O75400 [883-894]	1	1887.87	0							No Quan Values	Not Found	Not Found	Not Found	Not Found	Not Found	Not Found	Not Found	Not Found	Not Found	Not Found	High	High	0.0004359	0.007109	2.62
FALSE	High	[R].GPPSPPAPVMHSPSR.[K]	1xPhospho [S4]; 1xTMT6plex [N-Term]	Q13573 1xPhospho [S224]	0.000173659	0	1	1	1	Q13573	Q13573 [221-235]	0	1822.89	0							No Quan Values	Not Found	Not Found	Not Found	Not Found	High	Not Found	Not Found	Not Found	Not Found	Not Found	Not Found	High	0	1.518e-05	3.68
FALSE	High	[K].GPLNSESSNQSLCSVGSLSDK.[E]	1xCarbamidomethyl [C13]; 1xPhospho [S]; 1xTMT6plex [K21]; 1xTMT6plex [N-Term]	Q86UE8 1xPhospho [S]	9.25759e-05	0	1	1	2	Q86UE8	Q86UE8 [28-48]	0	2704.29	0							No Quan Values	Not Found	Not Found	Not Found	Not Found	Not Found	High	Not Found	Not Found	Not Found	Not Found	Not Found	High	0	8.536e-06	3.37
FALSE	High	[K].SEDPPGQEAGSEEEGSSASGLAK.[V]	1xPhospho [S11]; 1xTMT6plex [K23]; 1xTMT6plex [N-Term]	O75153 1xPhospho [S664]	0.000367428	0	1	1	1	O75153	O75153 [654-676]	0	2757.25	0							No Quan Values	Not Found	Not Found	Not Found	Not Found	Not Found	Not Found	Not Found	Not Found	Not Found	Not Found	High	High	0	2.98e-05	3.23
FALSE	High	[R].ENPLLPEEEEQR.[A]	1xTMT6plex [N-Term]		9.19584e-05	0	1	1	1	P78344	P78344 [189-200]	0	1711.87	0							No Quan Values	Not Found	Not Found	Not Found	Not Found	Not Found	Not Found	Not Found	Not Found	Not Found	High	Not Found	High	0	8.504e-06	3.46
FALSE	High	[R].ENSPAVSPTTNSTAPFGLKPR.[S]	2xPhospho [S3; S7]; 1xTMT6plex [K19]; 1xTMT6plex [N-Term]	Q9Y2L9 2xPhospho [S532; S536]	0.00231124	0.000108793	1	1	1	Q9Y2L9	Q9Y2L9 [530-550]	0	2789.37	0							No Quan Values	Not Found	Not Found	Not Found	Not Found	Not Found	High	Not Found	Not Found	Not Found	Not Found	Not Found	High	3.165e-05	0.0001394	3.6
FALSE	High	[R].SEGSEYEEIPK.[R]	1xPhospho [S]; 1xTMT6plex [K11]; 1xTMT6plex [N-Term]	P48634 1xPhospho [S]	0.0209596	0.000295797	1	1	3	P48634	P48634 [1089-1099]	0	1805.86	0							No Quan Values	High	High	Not Found	Not Found	Not Found	Not Found	Not Found	Not Found	Not Found	Not Found	Not Found	High	0.0001658	0.001487	2.61
FALSE	High	[R].GPEESQPPQLYAADEEEAPGTR.[D]	1xTMT6plex [N-Term]		3.1517e-05	0	1	1	1	Q5RKV6	Q5RKV6 [10-31]	0	2600.23	0							No Quan Values	Not Found	Not Found	Not Found	Not Found	Not Found	Not Found	Not Found	Not Found	Not Found	High	Not Found	High	0	3.171e-06	4.77
FALSE	High	[K].ENVATTDTLESTTVGTSV.[-]	1xTMT6plex [N-Term]		0.0383562	0.00057911	1	1	1	Q15046	Q15046 [580-597]	0	2054.03	0							No Quan Values	Not Found	Not Found	Not Found	Not Found	Not Found	Not Found	Not Found	Not Found	Not Found	High	Not Found	High	0.0002417	0.003567	2.56
FALSE	High	[R].EPALPLEPDSGGNTSPGVTANGEAR.[T]	1xPhospho [S/T]; 1xTMT6plex [N-Term]	Q92974 1xPhospho [T/S]	4.23207e-06	0	1	1	6	Q92974	Q92974 [682-706]	0	2745.29	0							No Quan Values	High	High	High	Not Found	Not Found	Not Found	Not Found	Not Found	Not Found	Not Found	Not Found	High	0	1.199e-06	4.52
FALSE	High	[R].GPASSHRESPR.[G]	1xPhospho [S9]; 1xTMT6plex [N-Term]	A4D2B0 1xPhospho [S61]	0.164117	0.00589781	1	1	1	A4D2B0	A4D2B0 [53-63]	1	1489.71	0							No Quan Values	Not Found	High	Not Found	Not Found	Not Found	Not Found	Not Found	Not Found	Not Found	Not Found	Not Found	High	0.002245	0.03667	1.4
FALSE	High	[K].SQSEYKPDTPQSGLEYSGIQELEDR.[R]	1xTMT6plex [K6]; 1xTMT6plex [N-Term]		6.53673e-05	0	1	1	1	Q16513	Q16513 [620-644]	0	3314.64	0							No Quan Values	Not Found	Not Found	Not Found	Not Found	Not Found	Not Found	Not Found	Not Found	Not Found	High	Not Found	High	0	6.207e-06	4.28
FALSE	High	[K].EMAEDDDDSFP.[-]	1xTMT6plex [N-Term]		0.0174146	0.000295797	1	1	1	O43242	O43242 [524-534]	0	1499.6	0							No Quan Values	Not Found	Not Found	Not Found	Not Found	Not Found	Not Found	Not Found	Not Found	Not Found	High	Not Found	High	0.000144	0.001169	2.6
FALSE	High	[R].SPSDSSTASTPVAEQIER.[A]	1xTMT6plex [N-Term]		1.92306e-10	0	1	1	1	Q16643	Q16643 [337-354]	0	2091.04	0							No Quan Values	Not Found	Not Found	Not Found	Not Found	Not Found	Not Found	Not Found	Not Found	Not Found	High	Not Found	High	0	4.682e-11	5.77
FALSE	High	[R].SGEDESQEDVLMDEAPSNLSQASTLQANR.[E]	1xPhospho [S6]; 1xOxidation [M12]; 1xTMT6plex [N-Term]	Q7Z6Z7 1xPhospho [S2377]	0.19423	0.00796737	1	1	1	Q7Z6Z7	Q7Z6Z7 [2372-2400]	0	3446.51	0							No Quan Values	Not Found	Not Found	Not Found	Not Found	Not Found	Not Found	Not Found	Not Found	Not Found	Not Found	High	High	0.003208	0.04691	2.69
FALSE	High	[R].GHLVTQVQAIDPDDGANSR.[I]	1xPhospho [T5]; 1xTMT6plex [N-Term]	Q8TDW7 1xPhospho [T2620]	0.168018	0.00615019	1	1	1	Q8TDW7	Q8TDW7 [2616-2634]	0	2302.1	0							No Quan Values	Not Found	Not Found	Not Found	Not Found	Not Found	Not Found	Not Found	Not Found	Not Found	High	Not Found	High	0.002445	0.03819	2.42
FALSE	High	[K].SMSLDMGQPSQANTK.[K]	1xPhospho [S]; 2xOxidation [M2; M6]; 1xTMT6plex [K15]; 1xTMT6plex [N-Term]	P21359 1xPhospho [S]	0.00663862	0.000108793	1	1	2	P21359	P21359 [2521-2535]	0	2165	0							No Quan Values	Not Found	Not Found	Not Found	Not Found	Not Found	High	Not Found	Not Found	Not Found	Not Found	Not Found	High	3.165e-05	0.0003825	3.53
FALSE	High	[K].SMSLDMGQPSQANTK.[K]	1xPhospho [S3]; 1xTMT6plex [K15]; 1xTMT6plex [N-Term]	P21359 1xPhospho [S2523]	0.000924859	0	1	1	1	P21359	P21359 [2521-2535]	0	2133.01	0							No Quan Values	Not Found	Not Found	Not Found	Not Found	Not Found	High	Not Found	Not Found	Not Found	Not Found	Not Found	High	0	6.589e-05	3.99
FALSE	High	[K].SLDQPFLSK.[S]	1xPhospho [S1]; 1xTMT6plex [K9]; 1xTMT6plex [N-Term]	Q8WWN8 1xPhospho [S1444]	0.0236046	0.000295797	1	1	1	Q8WWN8	Q8WWN8 [1444-1452]	0	1572.84	0							No Quan Values	Not Found	Not Found	Not Found	Not Found	Not Found	High	Not Found	Not Found	Not Found	Not Found	Not Found	High	0.0001658	0.001741	2.76
FALSE	High	[R].GDEGIFEESFIEER.[R]	1xTMT6plex [N-Term]		1.37443e-05	0	1	1	1	Q9UMY4	Q9UMY4 [106-119]	0	1885.9	0							No Quan Values	Not Found	Not Found	Not Found	Not Found	Not Found	Not Found	Not Found	Not Found	Not Found	High	Not Found	High	0	1.465e-06	3.74
FALSE	High	[K].FGYVDFESAEDLEK.[A]	1xTMT6plex [K14]; 1xTMT6plex [N-Term]		5.75783e-06	0	1	1	1	P19338	P19338 [349-362]	0	2107.06	0							No Quan Values	Not Found	Not Found	Not Found	Not Found	Not Found	Not Found	Not Found	Not Found	Not Found	High	Not Found	High	0	6.581e-07	3.98
FALSE	High	[R].FHPEPYGLEDDQR.[S]	1xTMT6plex [N-Term]		0.00444815	0.000108793	1	1	1	O60716	O60716 [275-287]	0	1831.88	0							No Quan Values	Not Found	Not Found	Not Found	Not Found	Not Found	Not Found	Not Found	Not Found	Not Found	High	Not Found	High	3.165e-05	0.0002541	2.86
FALSE	High	[K].SIEEQLGTEIKPIPSNIDK.[S]	2xTMT6plex [K11; K19]; 1xTMT6plex [N-Term]		2.88983e-06	0	1	1	1	P26196	P26196 [448-466]	0	2798.61	0							No Quan Values	Not Found	Not Found	Not Found	Not Found	Not Found	Not Found	Not Found	Not Found	Not Found	High	Not Found	High	0	3.462e-07	4.82
FALSE	High	[K].FKIDSNISPK.[K]	1xPhospho [S8]; 2xTMT6plex [K2; K10]; 1xTMT6plex [N-Term]	Q9H501 1xPhospho [S153]	0.179155	0.00689042	1	1	1	Q9H501	Q9H501 [146-155]	1	1916.09	0							No Quan Values	Not Found	Not Found	Not Found	Not Found	Not Found	Not Found	Not Found	High	Not Found	Not Found	Not Found	High	0.002753	0.04183	2.56
FALSE	High	[K].SMDSLCSVPVEGK.[E]	1xCarbamidomethyl [C6]; 1xPhospho [S]; 1xTMT6plex [K13]; 1xTMT6plex [N-Term]	Q2M1Z3 1xPhospho [S]	0.106282	0.00303607	1	1	2	Q2M1Z3	Q2M1Z3 [346-358]	0	1946.94	0							No Quan Values	Not Found	Not Found	Not Found	Not Found	High	Not Found	Not Found	Not Found	Not Found	Not Found	Not Found	High	0.001084	0.0185	2.72
FALSE	High	[R].FLEEGNLEEAEIQK.[Q]	1xTMT6plex [K14]; 1xTMT6plex [N-Term]		5.49566e-07	0	1	1	1	Q9H4L5	Q9H4L5 [816-829]	0	2107.13	0							No Quan Values	Not Found	Not Found	Not Found	Not Found	Not Found	Not Found	Not Found	Not Found	Not Found	High	Not Found	High	0	7.464e-08	4.32
FALSE	High	[K].FLEESVSMSPEER.[A]	1xPhospho [S]; 1xOxidation [M8]; 1xTMT6plex [N-Term]	P15374 1xPhospho [S]	0.0523632	0.0010351	1	1	3	P15374	P15374 [122-134]	0	1864.82	0							No Quan Values	Not Found	Not Found	High	Not Found	Not Found	Not Found	Not Found	Not Found	Not Found	Not Found	Not Found	High	0.0003628	0.00612	2.1
FALSE	High	[K].SLYYYIQQDTK.[G]	1xPhospho [Y]; 1xTMT6plex [K11]; 1xTMT6plex [N-Term]	P07355 1xPhospho [Y]	0.0338801	0.000389981	1	2	2	P07355	P07355 [314-324]	0	1959.99	0							No Quan Values	Not Found	Not Found	Not Found	Not Found	Not Found	Not Found	High	Not Found	Not Found	Not Found	Not Found	High	0.0002679	0.003661	2.43
FALSE	High	[K].SIGAASPRPQSLEK.[T]	1xPhospho [S6]; 1xTMT6plex [K14]; 1xTMT6plex [N-Term]	Q96L73 1xPhospho [S2369]	0.0205481	0.000295797	1	1	1	Q96L73	Q96L73 [2364-2377]	0	1979.07	0							No Quan Values	Not Found	Not Found	Not Found	Not Found	Not Found	High	Not Found	Not Found	Not Found	Not Found	Not Found	High	0.000144	0.001452	1.77
FALSE	High	[K].GAPSQDDESGGIEDSPDR.[G]	1xPhospho [S15]; 1xTMT6plex [N-Term]	Q9H4G0 1xPhospho [S678]	0.000120991	0	1	1	1	Q9H4G0	Q9H4G0 [664-681]	0	2140.89	0							No Quan Values	Not Found	Not Found	Not Found	Not Found	Not Found	Not Found	Not Found	Not Found	Not Found	Not Found	High	High	0	1.091e-05	3.71
FALSE	High	[R].SNMHFTSSSTGGLSSSQSSYSPSNR.[E]	1xPhospho [S16]; 1xTMT6plex [N-Term]	Q9P0J7 1xPhospho [S184]	1.15492e-05	0	1	1	1	Q9P0J7	Q9P0J7 [169-193]	0	2902.25	0							No Quan Values	Not Found	Not Found	Not Found	Not Found	Not Found	High	Not Found	Not Found	Not Found	Not Found	Not Found	High	0	1.249e-06	3.89
FALSE	High	[R].FMCNLDCQEEPDSCISEK.[L]	3xCarbamidomethyl [C3; C7; C14]; 1xTMT6plex [K18]; 1xTMT6plex [N-Term]		7.03815e-06	0	1	1	1	P06280	P06280 [50-67]	0	2720.21	0							No Quan Values	Not Found	Not Found	Not Found	Not Found	Not Found	Not Found	Not Found	Not Found	Not Found	High	Not Found	High	0	7.886e-07	3.43
FALSE	High	[R].GAHGIIVVYDVTDQESFNNVK.[Q]	1xTMT6plex [K21]; 1xTMT6plex [N-Term]		3.08986e-06	0	1	1	1	P62820	P62820 [83-103]	0	2763.47	0							No Quan Values	Not Found	Not Found	Not Found	Not Found	Not Found	Not Found	Not Found	Not Found	Not Found	High	Not Found	High	0	3.678e-07	4.47
FALSE	High	[K].FNGTHIPGSPFK.[I]	1xTMT6plex [K12]; 1xTMT6plex [N-Term]		0.138117	0.00474234	1	1	1	P21333	P21333 [2406-2417]	0	1759.99	0							No Quan Values	High	Not Found	Not Found	Not Found	Not Found	Not Found	Not Found	Not Found	Not Found	Not Found	Not Found	High	0.001743	0.02838	1.43
FALSE	High	[R].SLHGPCPVTTFGPK.[A]	1xCarbamidomethyl [C6]; 1xPhospho [S1]; 1xTMT6plex [K14]; 1xTMT6plex [N-Term]	O95544 1xPhospho [S64]	4.17466e-05	0	1	1	2	O95544	O95544 [64-77]	0	2036.04	0							No Quan Values	Not Found	Not Found	Not Found	Not Found	Not Found	Not Found	High	High	Not Found	Not Found	Not Found	High	0	3.967e-05	3.96
FALSE	High	[R].GADTAPTLAPEALPSQGEVER.[E]	1xPhospho [S15]; 1xTMT6plex [N-Term]	Q8IZL8 1xPhospho [S1033]	0.0533853	0.0010351	1	1	1	Q8IZL8	Q8IZL8 [1019-1039]	0	2418.18	0							No Quan Values	Not Found	High	Not Found	Not Found	Not Found	Not Found	Not Found	Not Found	Not Found	Not Found	Not Found	High	0.0003628	0.006064	2.59
FALSE	High	[K].SISSSNPDLAVAPGSVDDEVSR.[I]	1xPhospho [S]; 1xTMT6plex [N-Term]	Q96HP0 1xPhospho [S]	5.07028e-06	0	1	1	3	Q96HP0	Q96HP0 [880-901]	0	2511.18	0							No Quan Values	Not Found	Not Found	High	Not Found	Not Found	Not Found	Not Found	Not Found	Not Found	Not Found	Not Found	High	0	1.172e-06	4.13
FALSE	High	[K].FQEGQEEER.[L]	1xTMT6plex [N-Term]		0.00800115	0.000108793	1	1	1	P00488	P00488 [484-492]	0	1380.66	0							No Quan Values	Not Found	Not Found	Not Found	Not Found	Not Found	Not Found	Not Found	Not Found	Not Found	High	Not Found	High	3.165e-05	0.0004699	2.93
FALSE	High	[K].SLSQPTPPPMPILSQSEAK.[N]	1xPhospho [S]; 1xOxidation [M10]; 1xTMT6plex [K19]; 1xTMT6plex [N-Term]	Q9UPN3 1xPhospho [S]	0.00789521	0.000108793	1	1	2	Q9UPN3	Q9UPN3 [6967-6985]	0	2562.33	0							No Quan Values	Not Found	Not Found	Not Found	Not Found	Not Found	High	Not Found	Not Found	Not Found	Not Found	Not Found	High	0.000144	0.001137	3.15
FALSE	High	[K].SISNPPGSNLR.[T]	1xPhospho [S3]; 1xTMT6plex [N-Term]	Q9H4A3 1xPhospho [S2372]	0.178117	0.00689042	1	1	1	Q9H4A3	Q9H4A3 [2370-2380]	0	1450.73	0							No Quan Values	Not Found	Not Found	Not Found	Not Found	High	Not Found	Not Found	Not Found	Not Found	Not Found	Not Found	High	0.002753	0.04138	2.56
FALSE	High	[R].FWAANVPPSEALQPSSSPSTR.[R]	1xPhospho [S17]; 1xTMT6plex [N-Term]	Q96P48 1xPhospho [S632]	0.068527	0.00175403	1	1	1	Q96P48	Q96P48 [616-636]	0	2538.22	0							No Quan Values	Not Found	Not Found	Not Found	Not Found	Not Found	Not Found	Not Found	High	Not Found	Not Found	Not Found	High	0.0005796	0.009067	2.56
FALSE	High	[R].FSGWYDADLSPAGHEEAK.[R]	1xPhospho [S2]; 1xTMT6plex [K18]; 1xTMT6plex [N-Term]	P18669 1xPhospho [S23]	2.05466e-07	0	1	1	1	P18669	P18669 [22-39]	0	2518.17	0							No Quan Values	Not Found	Not Found	Not Found	Not Found	Not Found	High	Not Found	Not Found	Not Found	Not Found	Not Found	High	0	2.995e-08	5.81
FALSE	High	[K].FVEEEDDDEEEEEENLDDQDEQGNLK.[G]	1xTMT6plex [K26]; 1xTMT6plex [N-Term]		2.66878e-09	0	1	1	1	Q7KZ85	Q7KZ85 [30-55]	0	3599.56	0							No Quan Values	Not Found	Not Found	Not Found	Not Found	Not Found	Not Found	Not Found	Not Found	Not Found	High	Not Found	High	0	5.342e-10	5.62
FALSE	High	[K].SLSDSESDDSK.[S]	1xTMT6plex [K11]; 1xTMT6plex [N-Term]		0.000437239	0	1	1	1	Q13185	Q13185 [93-103]	0	1627.81	0							No Quan Values	Not Found	Not Found	Not Found	Not Found	Not Found	Not Found	Not Found	Not Found	Not Found	High	Not Found	High	0	3.481e-05	3.34
FALSE	High	[K].FSVPGFK.[A]	1xPhospho [S2]; 1xTMT6plex [K7]; 1xTMT6plex [N-Term]	Q09666 1xPhospho [S758]	0.114421	0.00328961	1	1	1	Q09666	Q09666 [757-763]	0	1319.72	0							No Quan Values	Not Found	Not Found	Not Found	Not Found	Not Found	Not Found	Not Found	High	Not Found	Not Found	Not Found	High	0.001175	0.02079	1.13
FALSE	High	[R].SIQFVDWCPTGFK.[V]	1xCarbamidomethyl [C8]; 1xPhospho [S1]; 1xTMT6plex [K13]; 1xTMT6plex [N-Term]	P68363 1xPhospho [S340]; P68366 1xPhospho [S340]	0.000332342	0	2	2	1	P68363; P68366	P68363 [340-352]; P68366 [340-352]	0	2123.04	0							No Quan Values	Not Found	Not Found	Not Found	Not Found	Not Found	Not Found	Not Found	High	Not Found	Not Found	Not Found	High	0	2.728e-05	3.3
FALSE	High	[K].FNADEFEDMVAEK.[R]	1xOxidation [M9]; 1xTMT6plex [K13]; 1xTMT6plex [N-Term]		0.0454205	0.000856746	1	1	1	P27635	P27635 [176-188]	0	2018.98	0							No Quan Values	Not Found	Not Found	Not Found	Not Found	Not Found	Not Found	Not Found	Not Found	Not Found	High	Not Found	High	0.0003161	0.004664	1.88
FALSE	High	[K].SAVLHSQSSSSSSR.[Q]	1xPhospho [S]; 1xTMT6plex [N-Term]	Q86WJ1 1xPhospho [S]	0.0313195	0.000389981	1	1	7	Q86WJ1	Q86WJ1 [880-893]	0	1728.81	0							No Quan Values	Not Found	Not Found	Not Found	Not Found	High	Not Found	Not Found	Not Found	Not Found	Not Found	Not Found	High	0.0001904	0.002624	2.13
FALSE	High	[R].FEIGEGENLDLPYGLER.[A]	1xTMT6plex [N-Term]		1.54082e-07	0	1	1	1	Q02790	Q02790 [190-206]	0	2180.11	0							No Quan Values	Not Found	Not Found	Not Found	Not Found	Not Found	Not Found	Not Found	Not Found	Not Found	High	Not Found	High	0	2.284e-08	4.69
FALSE	High	[R].SNSPLPSIQLQPQSPSASKK.[H]	1xPhospho [S14]; 2xTMT6plex [K19; K20]; 1xTMT6plex [N-Term]	Q08174 1xPhospho [S984]	3.85448e-07	0	1	1	1	Q08174	Q08174 [971-990]	1	2861.57	0							No Quan Values	Not Found	Not Found	Not Found	Not Found	Not Found	Not Found	Not Found	High	Not Found	Not Found	Not Found	High	0	5.371e-08	4.96
FALSE	High	[K].GHLDAELDAYMAQTDPETND.[-]	1xOxidation [M11]; 1xTMT6plex [N-Term]		0.000108706	0	1	1	1	Q9Y3Y2	Q9Y3Y2 [229-248]	0	2451.08	0							No Quan Values	Not Found	Not Found	Not Found	Not Found	Not Found	Not Found	Not Found	Not Found	Not Found	High	Not Found	High	0	9.914e-06	3.78
FALSE	High	[K].GGVTGSPEASISGSK.[G]	2xPhospho [S6; S10]; 1xTMT6plex [K15]; 1xTMT6plex [N-Term]	Q09666 2xPhospho [S5731; S5735]	0.0332214	0.000389981	1	1	1	Q09666	Q09666 [5726-5740]	0	1951.92	0							No Quan Values	Not Found	Not Found	High	Not Found	Not Found	Not Found	Not Found	Not Found	Not Found	Not Found	Not Found	High	0.0001904	0.002858	2.65
FALSE	High	[K].GGRSPDEVTLTSIVPTR.[D]	1xPhospho [S4]; 1xTMT6plex [N-Term]	Q9UKS6 1xPhospho [S319]	0.000169072	0	1	1	1	Q9UKS6	Q9UKS6 [316-332]	1	2094.08	0							No Quan Values	Not Found	Not Found	Not Found	Not Found	High	Not Found	Not Found	Not Found	Not Found	Not Found	Not Found	High	0	1.483e-05	3.6
FALSE	High	[K].SPPLGGAQTISK.[N]	1xPhospho [S1]; 1xTMT6plex [K12]; 1xTMT6plex [N-Term]	Q01543 1xPhospho [S241]	0.000336819	0	1	1	1	Q01543	Q01543 [241-252]	0	1693.93	0							No Quan Values	Not Found	Not Found	Not Found	Not Found	Not Found	High	Not Found	Not Found	Not Found	Not Found	Not Found	High	0	2.752e-05	3.58
FALSE	High	[R].SGSLLQVEETER.[E]	1xPhospho [S]; 1xTMT6plex [N-Term]	Q8WYL5 1xPhospho [S]	0.025213	0.000295797	1	1	4	Q8WYL5	Q8WYL5 [581-592]	0	1656.8	0							No Quan Values	High	Not Found	Not Found	Not Found	Not Found	Not Found	Not Found	Not Found	Not Found	Not Found	High	High	0.0003628	0.00605	2.12
FALSE	High	[R].SGSLLQVEETEREEGLGAGR.[W]	1xPhospho [S]; 1xTMT6plex [N-Term]	Q8WYL5 1xPhospho [S]	0.170995	0.00640328	1	1	2	Q8WYL5	Q8WYL5 [581-600]	1	2426.18	0							No Quan Values	Not Found	Not Found	Not Found	Not Found	Not Found	Not Found	Not Found	Not Found	Not Found	Not Found	High	High	0.002468	0.03896	2.72
FALSE	High	[K].SGSMEEDVDTSPGGDYYTSPSSPTSSSR.[N]	1xPhospho [S/T]; 1xOxidation [M4]; 1xTMT6plex [N-Term]	P08651 1xPhospho [S/T]	1.90883e-07	0	1	1	2	P08651	P08651 [284-311]	0	3208.3	0							No Quan Values	Not Found	Not Found	Not Found	Not Found	Not Found	Not Found	Not Found	Not Found	Not Found	Not Found	High	High	0	2.788e-08	4.77
FALSE	High	[K].SGSMEEDVDTSPGGDYYTSPSSPTSSSR.[N]	2xPhospho [S/Y/T]; 1xTMT6plex [N-Term]	P08651 2xPhospho [S/T/Y]	1.54044e-06	0	1	1	3	P08651	P08651 [284-311]	0	3272.27	0							No Quan Values	Not Found	Not Found	Not Found	Not Found	Not Found	Not Found	Not Found	Not Found	Not Found	Not Found	High	High	0	1.929e-07	4.26
FALSE	High	[R].GGCGSPGLQCK.[G]	2xCarbamidomethyl [C3; C10]; 1xPhospho [S5]; 1xTMT6plex [K11]; 1xTMT6plex [N-Term]	Q86YV5 1xPhospho [S907]	0.154707	0.00532056	1	1	1	Q86YV5	Q86YV5 [903-913]	0	1658.78	0							No Quan Values	Not Found	Not Found	Not Found	Not Found	High	Not Found	Not Found	Not Found	Not Found	Not Found	Not Found	High	0.002027	0.03373	1.92
FALSE	High	[R].GGAEQFMEETER.[S]	1xTMT6plex [N-Term]		0.000127646	0	1	1	1	Q99832	Q99832 [376-387]	0	1612.75	0							No Quan Values	Not Found	Not Found	Not Found	Not Found	Not Found	Not Found	Not Found	Not Found	Not Found	High	Not Found	High	0	1.144e-05	2.6
FALSE	High	[R].GFPTIYFSPANK.[K]	1xTMT6plex [K12]; 1xTMT6plex [N-Term]		0.0038404	0.000108793	1	1	2	P30101	P30101 [449-460]	0	1800.01	0							No Quan Values	High	High	Not Found	Not Found	Not Found	Not Found	Not Found	Not Found	Not Found	Not Found	Not Found	High	3.165e-05	0.0002204	2.48
FALSE	High	[R].EVEEELATSGGQSPTGEQIPQFQQR.[Q]	1xTMT6plex [N-Term]		9.27182e-11	0	1	1	1	Q9UPN3	Q9UPN3 [5580-5604]	0	2974.46	0							No Quan Values	Not Found	Not Found	Not Found	Not Found	Not Found	Not Found	Not Found	Not Found	Not Found	High	Not Found	High	0	2.368e-11	5.81
FALSE	High	[K].EVELEELK.[K]	1xTMT6plex [K8]; 1xTMT6plex [N-Term]		0.111647	0.00312299	0	1	1			0	1446.85	0							No Quan Values	Not Found	Not Found	Not Found	Not Found	Not Found	Not Found	Not Found	Not Found	Not Found	High	Not Found	High	0.00113	0.02005	2.39
FALSE	High	[K].EVELNELEPEK.[Q]	1xTMT6plex [K11]; 1xTMT6plex [N-Term]		0.000420035	0	1	1	1	P08195	P08195 [112-122]	0	1786.98	0							No Quan Values	Not Found	Not Found	Not Found	Not Found	Not Found	Not Found	Not Found	Not Found	Not Found	High	Not Found	High	0	3.362e-05	3.18
FALSE	High	[K].SNSLSEQLAINTSPDAVK.[A]	1xPhospho [S]; 1xTMT6plex [K18]; 1xTMT6plex [N-Term]	Q5T1M5 1xPhospho [S]	5.21042e-08	0	1	1	3	Q5T1M5	Q5T1M5 [344-361]	0	2412.24	0							No Quan Values	Not Found	Not Found	Not Found	Not Found	High	Not Found	Not Found	Not Found	Not Found	Not Found	Not Found	High	0	8.38e-09	5.44
FALSE	High	[R].GFELSSSTRK.[K]	1xPhospho [S]; 1xTMT6plex [K10]; 1xTMT6plex [N-Term]	O00443 1xPhospho [S]	0.145769	0.00498335	1	1	3	O00443	O00443 [54-63]	1	1649.87	0							No Quan Values	Not Found	Not Found	Not Found	Not Found	Not Found	Not Found	High	Not Found	Not Found	Not Found	Not Found	High	0.002558	0.03955	1.78
FALSE	High	[K].GEVDVSLANVEGDLK.[G]	1xTMT6plex [K15]; 1xTMT6plex [N-Term]		9.7046e-06	0	1	1	1	Q09666	Q09666 [3235-3249]	0	2003.11	0							No Quan Values	Not Found	Not Found	Not Found	Not Found	Not Found	Not Found	Not Found	Not Found	Not Found	High	Not Found	High	0	1.066e-06	3.65
FALSE	High	[K].GESEDDFWWCIDR.[C]	1xCarbamidomethyl [C10]; 1xTMT6plex [N-Term]		0.00481918	0.000108793	1	2	1	Q96HN2	Q96HN2 [283-295]	0	1943.84	0							No Quan Values	Not Found	Not Found	Not Found	Not Found	Not Found	Not Found	Not Found	Not Found	Not Found	High	Not Found	High	3.165e-05	0.0002757	2.8
FALSE	High	[R].SHSGTSPDNTAPPPPPPRPQPSHSR.[S]	1xPhospho [S/T]; 1xTMT6plex [N-Term]	Q96D71 1xPhospho [S/T]	8.83879e-07	0	1	1	5	Q96D71	Q96D71 [535-559]	0	2910.38	0							No Quan Values	Not Found	Not Found	Not Found	Not Found	High	High	Not Found	High	Not Found	Not Found	Not Found	High	0	1.398e-07	6.17
FALSE	High	[K].SPEPEVLSTQEDLFDQSNK.[T]	1xTMT6plex [K19]; 1xTMT6plex [N-Term]		0.000865032	0	1	1	1	Q12888	Q12888 [294-312]	0	2621.33	0							No Quan Values	Not Found	Not Found	Not Found	Not Found	Not Found	Not Found	Not Found	Not Found	Not Found	High	Not Found	High	0	6.232e-05	3.52
FALSE	High	[R].GEIGGLSLSPSPERR.[K]	1xPhospho [S11]; 1xTMT6plex [N-Term]	Q96GP6 1xPhospho [S653]	0.0472208	0.000948301	1	1	1	Q96GP6	Q96GP6 [643-657]	1	1863.95	0							No Quan Values	Not Found	Not Found	Not Found	Not Found	High	Not Found	Not Found	Not Found	Not Found	Not Found	Not Found	High	0.0003407	0.004973	2.27
FALSE	High	[R].SPEPDGPAPAFLR.[Q]	1xPhospho [S1]; 1xTMT6plex [N-Term]	Q9Y4F5 1xPhospho [S853]	0.00191676	0.000108793	1	1	1	Q9Y4F5	Q9Y4F5 [853-865]	0	1662.81	0							No Quan Values	Not Found	Not Found	High	Not Found	Not Found	Not Found	Not Found	Not Found	Not Found	Not Found	Not Found	High	3.165e-05	0.0001194	2.52
FALSE	High	[R].EVVAGSHELGQDYEHVTMLQER.[F]	1xTMT6plex [N-Term]		0.00391812	0.000108793	1	1	1	Q01082	Q01082 [1718-1739]	0	2756.35	0							No Quan Values	Not Found	Not Found	Not Found	Not Found	Not Found	Not Found	Not Found	Not Found	Not Found	High	Not Found	High	3.165e-05	0.0002243	2.71
FALSE	High	[K].GEFTIETEGK.[T]	1xTMT6plex [K10]; 1xTMT6plex [N-Term]		0.000464375	0	1	1	1	P41250	P41250 [538-547]	0	1568.86	0							No Quan Values	Not Found	Not Found	Not Found	Not Found	Not Found	Not Found	Not Found	Not Found	Not Found	High	Not Found	High	0	3.67e-05	2.77
FALSE	High	[K].GEETPVIVGSALCALEGR.[D]	1xCarbamidomethyl [C13]; 1xTMT6plex [N-Term]		2.01381e-07	0	1	1	1	P49411	P49411 [210-227]	0	2087.1	0							No Quan Values	Not Found	Not Found	Not Found	Not Found	Not Found	Not Found	Not Found	Not Found	Not Found	High	Not Found	High	0	2.927e-08	4.94
FALSE	High	[R].GEDVPSEEEEEEENGFEDR.[K]	1xPhospho [S6]; 1xTMT6plex [N-Term]	Q9ULX3 1xPhospho [S184]	0.000360126	0	1	1	1	Q9ULX3	Q9ULX3 [179-197]	0	2533.99	0							No Quan Values	Not Found	Not Found	Not Found	Not Found	Not Found	Not Found	Not Found	Not Found	Not Found	Not Found	High	High	0	2.918e-05	2.98
FALSE	High	[K].GEDLTEEEDGGIIR.[R]	1xTMT6plex [N-Term]		2.09581e-06	0	1	1	1	Q02790	Q02790 [139-152]	0	1761.87	0							No Quan Values	Not Found	Not Found	Not Found	Not Found	Not Found	Not Found	Not Found	Not Found	Not Found	High	Not Found	High	0	2.579e-07	4.28
FALSE	High	[K].GEDEEENNLEVR.[E]	1xTMT6plex [N-Term]		1.20284e-07	0	1	1	1	P04843	P04843 [90-101]	0	1661.78	0							No Quan Values	Not Found	Not Found	Not Found	Not Found	Not Found	Not Found	Not Found	Not Found	Not Found	High	Not Found	High	0	1.826e-08	4.5
FALSE	High	[R].GEAQDLLSQIAQLQEENK.[Q]	1xTMT6plex [K18]; 1xTMT6plex [N-Term]		1.56159e-07	0	1	1	1	Q5EBL4	Q5EBL4 [114-131]	0	2472.33	0							No Quan Values	Not Found	Not Found	Not Found	Not Found	Not Found	Not Found	Not Found	Not Found	Not Found	High	Not Found	High	0	2.319e-08	5.27
FALSE	High	[K].FAMEPEEFDSDTLR.[E]	1xOxidation [M3]; 1xTMT6plex [N-Term]		0.136465	0.0044861	1	1	1	P13667	P13667 [486-499]	0	1931.89	0							No Quan Values	Not Found	Not Found	Not Found	Not Found	Not Found	Not Found	Not Found	Not Found	Not Found	High	Not Found	High	0.00172	0.0278	2.47
FALSE	High	[K].EVHDELEDLPSPPPPLSPPPTTSPHK.[Q]	2xPhospho [S11; S17]; 1xTMT6plex [K26]; 1xTMT6plex [N-Term]	Q9NQX3 2xPhospho [S188; S194]	5.68546e-09	0	1	1	1	Q9NQX3	Q9NQX3 [178-203]	0	3431.66	0							No Quan Values	Not Found	Not Found	High	Not Found	Not Found	Not Found	Not Found	Not Found	Not Found	Not Found	Not Found	High	0	1.074e-09	5.03
FALSE	High	[R].SSGSETEQVVDFSDR.[E]	1xPhospho [S/T]; 1xTMT6plex [N-Term]	O95251 1xPhospho [S]	0.0055443	0.000108793	1	1	2	O95251	O95251 [99-113]	0	1951.85	0							No Quan Values	Not Found	Not Found	Not Found	Not Found	Not Found	Not Found	Not Found	Not Found	Not Found	Not Found	High	High	3.165e-05	0.0003167	2.96
FALSE	High	[K].SATLSSTESTASEMQEEMK.[G]	1xPhospho [T7]; 1xOxidation [M18]; 1xTMT6plex [K19]; 1xTMT6plex [N-Term]	Q02952 1xPhospho [T646]	5.79486e-05	0	1	1	1	Q02952	Q02952 [640-658]	0	2601.17	0							No Quan Values	Not Found	Not Found	High	Not Found	Not Found	Not Found	Not Found	Not Found	Not Found	Not Found	Not Found	High	0	5.559e-06	3.48
FALSE	High	[K].SATFPNAGPR.[H]	1xPhospho [T3]; 1xTMT6plex [N-Term]	Q86X27 1xPhospho [T361]	0.0887586	0.0025315	1	1	1	Q86X27	Q86X27 [359-368]	0	1326.64	0							No Quan Values	Not Found	Not Found	Not Found	Not Found	High	Not Found	Not Found	Not Found	Not Found	Not Found	Not Found	High	0.0009331	0.01377	2.97
FALSE	High	[R].EAGVEMGDEDDLSTPNEK.[L]	1xTMT6plex [K18]; 1xTMT6plex [N-Term]		3.30455e-07	0	1	1	1	P14868	P14868 [357-374]	0	2394.14	0							No Quan Values	Not Found	Not Found	Not Found	Not Found	Not Found	Not Found	Not Found	Not Found	Not Found	High	Not Found	High	0	4.648e-08	4.5
FALSE	High	[R].EAIAELER.[E]	1xTMT6plex [N-Term]		0.0174146	0.000295797	1	1	1	Q15149	Q15149 [2587-2594]	0	1159.65	0							No Quan Values	Not Found	Not Found	Not Found	Not Found	Not Found	Not Found	Not Found	Not Found	Not Found	High	Not Found	High	0.000144	0.001167	2.34
FALSE	High	[K].SYLEGSSDNQLKDSESTPVDDR.[I]	1xPhospho [S6]; 1xTMT6plex [K12]; 1xTMT6plex [N-Term]	Q9UHI6 1xPhospho [S677]	0.114421	0.00328961	1	1	1	Q9UHI6	Q9UHI6 [672-693]	1	2980.38	0							No Quan Values	Not Found	Not Found	High	Not Found	Not Found	Not Found	Not Found	Not Found	Not Found	Not Found	Not Found	High	0.001175	0.02085	2.55
FALSE	High	[R].KAEDSDSEPEPEDNVR.[L]	2xPhospho [S5; S7]; 1xTMT6plex [K1]; 1xTMT6plex [N-Term]	Q9H0D6 2xPhospho [S499; S501]	1.92117e-06	0	1	1	1	Q9H0D6	Q9H0D6 [495-510]	1	2435.04	0							No Quan Values	Not Found	Not Found	Not Found	Not Found	Not Found	Not Found	Not Found	Not Found	Not Found	Not Found	High	High	0	2.371e-07	4.32
FALSE	High	[K].KAASTDLGAGETVVGK.[V]	1xPhospho [S4]; 2xTMT6plex [K1; K16]; 1xTMT6plex [N-Term]	Q15032 1xPhospho [S973]	2.42828e-06	0	1	1	1	Q15032	Q15032 [970-985]	1	2271.26	0							No Quan Values	Not Found	Not Found	Not Found	Not Found	Not Found	High	Not Found	Not Found	Not Found	Not Found	Not Found	High	0	2.947e-07	5.29
FALSE	High	[K].SYCAEIAHNVSSK.[N]	1xCarbamidomethyl [C3]; 1xTMT6plex [K13]; 1xTMT6plex [N-Term]		0.0092641	0.000209539	1	1	1	P62910	P62910 [94-106]	0	1924	0							No Quan Values	Not Found	Not Found	Not Found	Not Found	Not Found	Not Found	High	Not Found	Not Found	Not Found	Not Found	High	6.142e-05	0.0005545	1.72
FALSE	High	[K].RLSVLEEEATEGGTSR.[V]	1xPhospho [S3]; 1xTMT6plex [N-Term]	O75808 1xPhospho [S296]	0.175034	0.00689042	1	1	1	O75808	O75808 [294-309]	1	2043	0							No Quan Values	Not Found	High	Not Found	Not Found	Not Found	Not Found	Not Found	Not Found	Not Found	Not Found	Not Found	High	0.002669	0.04027	1.87
FALSE	High	[K].SWDVCSQLGQSEGYQDLATR.[Q]	1xCarbamidomethyl [C5]; 1xTMT6plex [N-Term]		0.000325737	0	1	1	1	A2RRP1	A2RRP1 [1315-1334]	0	2529.19	0							No Quan Values	Not Found	Not Found	Not Found	Not Found	Not Found	Not Found	Not Found	Not Found	Not Found	High	Not Found	High	0	2.682e-05	3.55
FALSE	High	[R].HTNPSSSSPGTR.[T]	1xPhospho [S]; 1xTMT6plex [N-Term]	Q8WUH2 1xPhospho [S]	0.00501612	0.000108793	1	1	9	Q8WUH2	Q8WUH2 [848-859]	0	1536.7	0							No Quan Values	Not Found	High	High	Not Found	Not Found	Not Found	Not Found	Not Found	Not Found	Not Found	High	High	3.165e-05	0.0002853	2.87
FALSE	High	[R].SVSSPSSFTMK.[T]	1xPhospho [S7]; 1xTMT6plex [K11]; 1xTMT6plex [N-Term]	P28827 1xPhospho [S824]	0.181246	0.00697215	1	1	1	P28827	P28827 [818-828]	0	1695.84	0							No Quan Values	Not Found	Not Found	Not Found	Not Found	Not Found	Not Found	High	Not Found	Not Found	Not Found	Not Found	High	0.002774	0.0424	1.74
FALSE	High	[K].HSTPSNSSNPSGPPSPNSPHR.[S]	2xPhospho [S11; S15]; 1xTMT6plex [N-Term]	Q9Y5S2 2xPhospho [S1686; S1690]	0.00459915	0.000108793	1	1	2	Q9Y5S2	Q9Y5S2 [1676-1696]	0	2530.07	0							No Quan Values	Not Found	High	High	Not Found	Not Found	Not Found	Not Found	Not Found	Not Found	Not Found	Not Found	High	3.165e-05	0.000262	3.06
FALSE	High	[K].HSTPSNSSNPSGPPSPNSPHR.[S]	1xPhospho [S15]; 1xTMT6plex [N-Term]	Q9Y5S2 1xPhospho [S1690]	1.48975e-06	0	1	1	6	Q9Y5S2	Q9Y5S2 [1676-1696]	0	2450.1	0							No Quan Values	Not Found	High	High	Not Found	High	High	High	High	Not Found	Not Found	Not Found	High	0	1.877e-07	4.83
FALSE	High	[R].ECVRIYGGERPYTHK.[E]	1xCarbamidomethyl [C2]; 2xPhospho [Y6; T13]; 1xTMT6plex [K15]; 1xTMT6plex [N-Term]	Q9BR84 2xPhospho [Y207; T214]	0.213943	0.00984916	1	1	1	Q9BR84	Q9BR84 [202-216]	1	2483.17	0							No Quan Values	Not Found	Not Found	Not Found	Not Found	Not Found	Not Found	Not Found	Not Found	Not Found	High	Not Found	High	0.003827	0.0534	3.71
FALSE	High	[R].RNSVTPLASPEPTK.[K]	1xPhospho [S/T]; 1xTMT6plex [K14]; 1xTMT6plex [N-Term]	Q16875 1xPhospho [S/T]	0.000117796	0	1	1	2	Q16875	Q16875 [459-472]	1	2035.1	0							No Quan Values	Not Found	Not Found	Not Found	Not Found	High	Not Found	Not Found	Not Found	Not Found	Not Found	Not Found	High	0	1.066e-05	4.37
FALSE	High	[K].KAPAGPSLEETSVSSPK.[G]	1xPhospho [S]; 2xTMT6plex [K1; K17]; 1xTMT6plex [N-Term]	Q6AI08 1xPhospho [S]	0.0537302	0.0010351	1	1	3	Q6AI08	Q6AI08 [629-645]	1	2452.33	0							No Quan Values	Not Found	Not Found	Not Found	Not Found	Not Found	Not Found	High	Not Found	Not Found	Not Found	Not Found	High	0.0008192	0.0118	2.28
FALSE	High	[R].RPATPAEVR.[Y]	1xPhospho [T4]; 1xTMT6plex [N-Term]	Q15464 1xPhospho [T172]	0.177085	0.00689042	1	1	1	Q15464	Q15464 [169-177]	0	1305.69	0							No Quan Values	Not Found	High	Not Found	Not Found	Not Found	Not Found	Not Found	Not Found	Not Found	Not Found	Not Found	High	0.002733	0.04104	1.63
FALSE	High	[R].EDEGEPGDEGQLEDEGSQEK.[Q]	1xTMT6plex [K20]; 1xTMT6plex [N-Term]		6.89995e-07	0	1	1	1	Q969E4	Q969E4 [49-68]	0	2635.19	0							No Quan Values	Not Found	Not Found	Not Found	Not Found	Not Found	Not Found	Not Found	Not Found	Not Found	High	Not Found	High	0	9.165e-08	4.05
FALSE	High	[K].EDEKGDDVDDPENQNSALADTDASGGLTK.[E]	2xTMT6plex [K4; K29]; 1xTMT6plex [N-Term]		9.77939e-10	0	1	1	1	Q02952	Q02952 [1697-1725]	1	3693.78	0							No Quan Values	Not Found	Not Found	Not Found	Not Found	Not Found	Not Found	Not Found	Not Found	Not Found	High	Not Found	High	0	2.112e-10	6.99
FALSE	High	[R].EDEMEENLTQVGSILGNLK.[D]	1xOxidation [M4]; 1xTMT6plex [K19]; 1xTMT6plex [N-Term]		2.66612e-05	0	1	1	1	O00161	O00161 [149-167]	0	2593.34	0							No Quan Values	Not Found	Not Found	Not Found	Not Found	Not Found	Not Found	Not Found	Not Found	Not Found	High	Not Found	High	0	2.702e-06	3.75
FALSE	High	[R].RPGAPSLSPAPR.[S]	1xPhospho [S8]; 1xTMT6plex [N-Term]	Q5QP82 1xPhospho [S63]	0.0242355	0.000295797	1	1	1	Q5QP82	Q5QP82 [56-67]	0	1514.8	0							No Quan Values	Not Found	Not Found	Not Found	Not Found	High	Not Found	Not Found	Not Found	Not Found	Not Found	Not Found	High	0.0001658	0.001821	3.57
FALSE	High	[R].RPLIDQVVQTALSETQDPEEVSVTVK.[A]	1xTMT6plex [K26]; 1xTMT6plex [N-Term]		3.00898e-07	0	1	1	1	Q00610	Q00610 [968-993]	0	3339.84	0							No Quan Values	Not Found	Not Found	Not Found	Not Found	Not Found	Not Found	Not Found	Not Found	Not Found	High	Not Found	High	0	4.255e-08	6.2
FALSE	High	[K].HRPSEADEEELAR.[R]	1xPhospho [S4]; 1xTMT6plex [N-Term]	O14617 1xPhospho [S658]	0.0200117	0.000295797	1	1	1	O14617	O14617 [655-667]	0	1847.85	0							No Quan Values	Not Found	Not Found	Not Found	Not Found	Not Found	Not Found	Not Found	Not Found	Not Found	Not Found	High	High	0.000144	0.001403	2.35
FALSE	High	[R].RPISADSAIMNPASK.[V]	1xPhospho [S4]; 1xTMT6plex [K15]; 1xTMT6plex [N-Term]	Q00610 1xPhospho [S67]	9.63688e-05	0	1	1	1	Q00610	Q00610 [64-78]	0	2096.1	0							No Quan Values	Not Found	Not Found	Not Found	Not Found	Not Found	Not Found	High	Not Found	Not Found	Not Found	Not Found	High	0	8.871e-06	3.96
FALSE	High	[K].SVKEDSNLTLQEK.[K]	1xPhospho [S1]; 2xTMT6plex [K3; K13]; 1xTMT6plex [N-Term]	P46940 1xPhospho [S1443]	0.0154557	0.000295797	1	1	1	P46940	P46940 [1443-1455]	1	2258.22	0							No Quan Values	Not Found	Not Found	Not Found	Not Found	Not Found	High	Not Found	Not Found	Not Found	Not Found	Not Found	High	0.000144	0.001006	2.52
FALSE	High	[R].EDPNLVPSISNK.[R]	1xTMT6plex [K12]; 1xTMT6plex [N-Term]		0.00139064	0.000108793	1	1	1	P10606	P10606 [75-86]	0	1771	0							No Quan Values	Not Found	Not Found	Not Found	Not Found	Not Found	Not Found	Not Found	Not Found	Not Found	High	Not Found	High	3.165e-05	9.194e-05	2.65
FALSE	High	[K].SVEEPTQPGGTGLSDSR.[T]	1xPhospho [S1]; 1xTMT6plex [N-Term]	Q9H0B6 1xPhospho [S589]	0.00031502	0	1	1	1	Q9H0B6	Q9H0B6 [589-605]	0	2025.93	0							No Quan Values	Not Found	Not Found	Not Found	Not Found	Not Found	Not Found	Not Found	Not Found	Not Found	Not Found	High	High	0	2.602e-05	2.95
FALSE	High	[K].EDSSSAEFLEK.[R]	1xTMT6plex [K11]; 1xTMT6plex [N-Term]		0.00805465	0.000108793	1	1	1	Q13596	Q13596 [227-237]	0	1699.88	0							No Quan Values	Not Found	Not Found	Not Found	Not Found	Not Found	Not Found	Not Found	Not Found	Not Found	High	Not Found	High	3.165e-05	0.000474	2.5
FALSE	High	[R].EDTLATFDGFIECEEPNNR.[L]	1xCarbamidomethyl [C13]; 1xTMT6plex [N-Term]		3.55614e-06	0	1	1	1	O43520	O43520 [253-271]	0	2486.13	0							No Quan Values	Not Found	Not Found	Not Found	Not Found	Not Found	Not Found	Not Found	Not Found	Not Found	High	Not Found	High	0	4.196e-07	4.13
FALSE	High	[K].HPSAVTACNLDLENLITDSNR.[S]	1xCarbamidomethyl [C8]; 1xTMT6plex [N-Term]		2.25535e-05	0	1	1	1	Q9UBF2	Q9UBF2 [318-338]	0	2569.29	0							No Quan Values	Not Found	Not Found	Not Found	Not Found	Not Found	Not Found	Not Found	Not Found	Not Found	High	Not Found	High	0	2.32e-06	4.21
FALSE	High	[R].SVDAYDSYWESR.[K]	1xPhospho [S1]; 1xTMT6plex [N-Term]	Q9UM82 1xPhospho [S253]	0.100529	0.00269654	1	1	1	Q9UM82	Q9UM82 [253-264]	0	1786.75	0							No Quan Values	Not Found	Not Found	High	Not Found	Not Found	Not Found	Not Found	Not Found	Not Found	Not Found	Not Found	High	0.0009961	0.01687	2.25
FALSE	High	[K].HSLTSQSQISPK.[S]	1xPhospho [T4]; 1xTMT6plex [K12]; 1xTMT6plex [N-Term]	Q6IMN6 1xPhospho [T560]	0.183358	0.00705008	1	1	1	Q6IMN6	Q6IMN6 [557-568]	0	1850.98	0							No Quan Values	Not Found	Not Found	Not Found	Not Found	Not Found	High	Not Found	Not Found	Not Found	Not Found	Not Found	High	0.002858	0.04329	1.28
FALSE	High	[R].SVASNQSEMEFSSLQDMPK.[E]	1xPhospho [S4]; 1xOxidation [M17]; 1xTMT6plex [K19]; 1xTMT6plex [N-Term]	Q8N163 1xPhospho [S678]	0.0338801	0.000389981	1	1	1	Q8N163	Q8N163 [675-693]	0	2669.22	0							No Quan Values	Not Found	Not Found	Not Found	Not Found	High	Not Found	Not Found	Not Found	Not Found	Not Found	Not Found	High	0.0001904	0.002953	3.4
FALSE	High	[R].RLSLPGLLSQVSPR.[L]	2xPhospho [S3; S9]; 1xTMT6plex [N-Term]	Q96Q42 2xPhospho [S483; S489]	0.00109315	0.000108793	1	1	1	Q96Q42	Q96Q42 [481-494]	1	1912	0							No Quan Values	Not Found	Not Found	Not Found	Not Found	Not Found	Not Found	High	Not Found	Not Found	Not Found	Not Found	High	3.165e-05	7.561e-05	4.8
FALSE	High	[K].EAALSTALSEK.[R]	1xTMT6plex [K11]; 1xTMT6plex [N-Term]		0.00116095	0.000108793	1	1	1	P02545	P02545 [145-155]	0	1577.92	0							No Quan Values	Not Found	Not Found	Not Found	Not Found	Not Found	Not Found	Not Found	Not Found	Not Found	High	Not Found	High	3.165e-05	7.929e-05	2.75
FALSE	High	[R].RASTAFCPPAASSEAPDGPSSTAR.[L]	1xCarbamidomethyl [C7]; 1xPhospho [S/T]; 1xTMT6plex [N-Term]	O00562 1xPhospho [S/T]	9.20546e-09	0	1	1	2	O00562	O00562 [662-685]	1	2700.23	0							No Quan Values	Not Found	Not Found	Not Found	Not Found	High	Not Found	Not Found	Not Found	Not Found	Not Found	Not Found	High	0	1.687e-09	4.75
FALSE	High	[K].TETVEEPMEEEEAAKEEK.[E]	1xOxidation [M8]; 2xTMT6plex [K15; K18]; 1xTMT6plex [N-Term]		1.21031e-05	0	1	1	1	P14625	P14625 [286-303]	1	2811.41	0							No Quan Values	Not Found	Not Found	Not Found	Not Found	Not Found	Not Found	Not Found	Not Found	Not Found	High	Not Found	High	0	1.305e-06	3.62
FALSE	High	[R].RASVCSSGGGEHR.[G]	1xCarbamidomethyl [C5]; 1xPhospho [S3]; 1xTMT6plex [N-Term]	Q2V2M9 1xPhospho [S345]	0.00213311	0.000108793	1	1	1	Q2V2M9	Q2V2M9 [343-355]	1	1668.75	0							No Quan Values	Not Found	Not Found	High	Not Found	Not Found	Not Found	Not Found	Not Found	Not Found	Not Found	Not Found	Not Found	3.165e-05	0.0001304	2.41
FALSE	High	[K].KLPSDSGDLEALEGK.[D]	1xPhospho [S4]; 2xTMT6plex [K1; K15]; 1xTMT6plex [N-Term]	O60524 1xPhospho [S831]	0.00373915	0.000108793	1	1	1	O60524	O60524 [828-842]	1	2326.25	0							No Quan Values	Not Found	Not Found	Not Found	Not Found	Not Found	High	Not Found	Not Found	Not Found	Not Found	Not Found	High	3.165e-05	0.0002154	4.25
FALSE	High	[K].KLPSDPDVLEGEVTDEDEEAEMSR.[R]	1xPhospho [T14]; 1xTMT6plex [K1]; 1xTMT6plex [N-Term]	Q15111 1xPhospho [T556]	0.000798322	0	1	1	1	Q15111	Q15111 [543-566]	1	3228.49	0							No Quan Values	Not Found	Not Found	Not Found	Not Found	Not Found	Not Found	Not Found	Not Found	Not Found	Not Found	High	High	0	5.846e-05	3.54
FALSE	High	[R].KLLEGEEER.[L]	1xTMT6plex [K1]; 1xTMT6plex [N-Term]		0.0187305	0.000295797	3	3	1	P20700; P02545; Q03252	P20700 [379-387]; P02545 [378-386]; Q03252 [393-401]	1	1560.9	0							No Quan Values	Not Found	Not Found	Not Found	Not Found	Not Found	Not Found	Not Found	Not Found	Not Found	High	Not Found	High	0.000144	0.001285	2.37
FALSE	High	[K].TEPTSPTPSAFK.[G]	1xPhospho [S5]; 1xTMT6plex [K12]; 1xTMT6plex [N-Term]	Q86XN7 1xPhospho [S613]	0.155626	0.00532056	1	1	1	Q86XN7	Q86XN7 [609-620]	0	1800.92	0							No Quan Values	Not Found	Not Found	Not Found	Not Found	High	Not Found	Not Found	Not Found	Not Found	Not Found	Not Found	High	0.002027	0.03401	2.26
FALSE	High	[K].TENPLILIDEVDK.[I]	1xTMT6plex [K13]; 1xTMT6plex [N-Term]		4.2027e-05	0	1	1	1	P36776	P36776 [582-594]	0	1957.13	0							No Quan Values	Not Found	Not Found	Not Found	Not Found	Not Found	Not Found	Not Found	Not Found	Not Found	High	Not Found	High	0	4.12e-06	3.3
FALSE	High	[K].TEMGPPPSPASTCSDASSIASSASMPYK.[R]	1xCarbamidomethyl [C13]; 1xPhospho [S8]; 1xOxidation [M25]; 1xTMT6plex [K28]; 1xTMT6plex [N-Term]	O95071 1xPhospho [S612]	0.0212385	0.000295797	1	1	1	O95071	O95071 [605-632]	0	3368.51	0							No Quan Values	Not Found	Not Found	Not Found	Not Found	High	Not Found	Not Found	Not Found	Not Found	Not Found	Not Found	High	0.0001658	0.001515	3.77
FALSE	High	[K].KLGAGEGGEASVSPEK.[T]	1xPhospho [S13]; 2xTMT6plex [K1; K16]; 1xTMT6plex [N-Term]	Q13428 1xPhospho [S1378]	3.65622e-10	0	1	1	1	Q13428	Q13428 [1366-1381]	1	2283.22	0							No Quan Values	Not Found	Not Found	Not Found	Not Found	Not Found	High	Not Found	Not Found	Not Found	Not Found	Not Found	High	0	8.488e-11	6.34
FALSE	High	[K].KLEGNSPQGSNQGVK.[I]	1xPhospho [S10]; 2xTMT6plex [K1; K15]; 1xTMT6plex [N-Term]	P61006 1xPhospho [S185]	0.00158958	0.000108793	1	1	2	P61006	P61006 [176-190]	1	2310.24	0							No Quan Values	Not Found	Not Found	Not Found	Not Found	Not Found	Not Found	High	Not Found	Not Found	Not Found	Not Found	High	3.165e-05	0.0001025	3.09
FALSE	High	[K].TEGTQEADQYADEK.[T]	1xTMT6plex [K14]; 1xTMT6plex [N-Term]		1.54082e-07	0	1	1	1	Q02952	Q02952 [1261-1274]	0	2042.99	0							No Quan Values	Not Found	Not Found	Not Found	Not Found	Not Found	Not Found	Not Found	Not Found	Not Found	High	Not Found	High	0	2.284e-08	4.93
FALSE	High	[R].KIDTHPSPSHSSTVK.[D]	1xPhospho [S]; 2xTMT6plex [K1; K15]; 1xTMT6plex [N-Term]	Q8NI27 1xPhospho [S]	0.121631	0.00354095	1	1	2	Q8NI27	Q8NI27 [1411-1425]	1	2388.29	0							No Quan Values	Not Found	Not Found	Not Found	Not Found	Not Found	Not Found	High	Not Found	Not Found	Not Found	Not Found	High	0.001743	0.02817	1.95
FALSE	High	[R].KKVEEEDEEEEEEEEEEEEEEDE.[-]	2xTMT6plex [K1; K2]; 1xTMT6plex [N-Term]		0.018241	0.000295797	1	1	1	O15347	O15347 [178-200]	2	3614.59	0							No Quan Values	Not Found	Not Found	Not Found	Not Found	Not Found	Not Found	Not Found	Not Found	Not Found	High	Not Found	High	0.000144	0.001247	3.82
FALSE	High	[R].KASQLVGIEK.[K]	1xPhospho [S3]; 2xTMT6plex [K1; K10]; 1xTMT6plex [N-Term]	Q9NPD8 1xPhospho [S184]	0.0544265	0.0010351	1	1	1	Q9NPD8	Q9NPD8 [182-191]	1	1840.09	0							No Quan Values	Not Found	Not Found	Not Found	Not Found	Not Found	Not Found	High	Not Found	Not Found	Not Found	Not Found	High	0.0003628	0.006252	2.51
FALSE	High	[R].RDSITPDIATKPGQPLFLDSISPK.[K]	1xPhospho [S3]; 2xTMT6plex [K11; K24]; 1xTMT6plex [N-Term]	Q2TB10 1xPhospho [S317]	0.0010643	0.000108793	1	1	1	Q2TB10	Q2TB10 [315-338]	1	3363.85	0							No Quan Values	Not Found	Not Found	Not Found	Not Found	Not Found	Not Found	Not Found	High	Not Found	Not Found	Not Found	High	3.165e-05	7.418e-05	3.54
FALSE	High	[K].TDLNPDNLQGGDDLDPNYVLSSR.[V]	1xTMT6plex [N-Term]		6.28587e-09	0	1	1	1	P12277	P12277 [108-130]	0	2747.33	0							No Quan Values	Not Found	Not Found	Not Found	Not Found	Not Found	Not Found	Not Found	Not Found	Not Found	High	Not Found	High	0	1.18e-09	4.49
FALSE	High	[K].DTSEDIEELVEPVAAHGPK.[I]	1xTMT6plex [K19]; 1xTMT6plex [N-Term]		3.13227e-07	0	1	1	1	Q99460	Q99460 [916-934]	0	2494.31	0							No Quan Values	Not Found	Not Found	Not Found	Not Found	Not Found	Not Found	Not Found	Not Found	Not Found	High	Not Found	High	0	4.431e-08	4.45
FALSE	High	[K].DVDDFFEHER.[T]	1xTMT6plex [N-Term]		0.00444815	0.000108793	1	1	1	Q9UNH7	Q9UNH7 [205-214]	0	1537.71	0							No Quan Values	Not Found	Not Found	Not Found	Not Found	Not Found	Not Found	Not Found	Not Found	Not Found	High	Not Found	High	3.165e-05	0.0002537	2.75
FALSE	High	[R].DVDFEGTDEPIFGK.[K]	1xTMT6plex [K14]; 1xTMT6plex [N-Term]		0.00171087	0.000108793	1	1	1	P42285	P42285 [65-78]	0	2027.04	0							No Quan Values	Not Found	Not Found	Not Found	Not Found	Not Found	Not Found	Not Found	Not Found	Not Found	High	Not Found	High	3.165e-05	0.0001085	3.04
FALSE	High	[K].DVIELTDDSFDK.[N]	1xTMT6plex [K12]; 1xTMT6plex [N-Term]		7.7791e-05	0	1	1	1	Q15084	Q15084 [161-172]	0	1854.97	0							No Quan Values	Not Found	Not Found	Not Found	Not Found	Not Found	Not Found	Not Found	Not Found	Not Found	High	Not Found	High	0	7.262e-06	3.61
FALSE	High	[K].DVNAAIATIK.[T]	1xTMT6plex [K10]; 1xTMT6plex [N-Term]		0.00153732	0.000108793	2	5	1	P68363; Q9BQE3	P68363 [327-336]; Q9BQE3 [327-336]	0	1473.9	0							No Quan Values	Not Found	Not Found	Not Found	Not Found	Not Found	Not Found	Not Found	High	Not Found	Not Found	Not Found	High	3.165e-05	9.998e-05	2.44
FALSE	High	[R].TATESFASDPILYRPVAVALDTK.[G]	1xTMT6plex [K23]; 1xTMT6plex [N-Term]		1.03071e-05	0	1	1	1	P14618	P14618 [93-115]	0	2923.62	0							No Quan Values	Not Found	Not Found	Not Found	Not Found	Not Found	Not Found	Not Found	High	Not Found	Not Found	Not Found	High	0	1.124e-06	3.47
FALSE	High	[R].TASQEGCQELTQEQR.[D]	1xCarbamidomethyl [C7]; 1xPhospho [S/T]; 1xTMT6plex [N-Term]	O43933 1xPhospho [T/S]	0.00025092	0	1	1	2	O43933	O43933 [1179-1193]	0	2073.91	0							No Quan Values	High	Not Found	Not Found	Not Found	Not Found	Not Found	Not Found	Not Found	Not Found	Not Found	Not Found	High	0	2.947e-05	3.49
FALSE	High	[K].KEKPELSEPSHLNGPSSDPEAAFLSR.[D]	1xPhospho [S]; 2xTMT6plex [K1; K3]; 1xTMT6plex [N-Term]	Q9H4A3 1xPhospho [S]	2.54409e-05	0	1	1	2	Q9H4A3	Q9H4A3 [1996-2021]	1	3589.85	0							No Quan Values	Not Found	Not Found	Not Found	Not Found	Not Found	Not Found	High	Not Found	Not Found	Not Found	Not Found	High	0	2.592e-06	4.79
FALSE	High	[R].RHSSETFSSTPSATR.[V]	1xPhospho [S3]; 1xTMT6plex [N-Term]	P35568 1xPhospho [S1100]	0.025213	0.000295797	1	1	1	P35568	P35568 [1098-1112]	1	1959.91	0							No Quan Values	Not Found	Not Found	Not Found	Not Found	High	Not Found	Not Found	Not Found	Not Found	Not Found	Not Found	High	0.0001658	0.001913	3.26
FALSE	High	[R].TASETRSEGSEYEEIPKR.[R]	2xPhospho [S3; S7]; 1xTMT6plex [K17]; 1xTMT6plex [N-Term]	P48634 2xPhospho [S1085; S1089]	0.144037	0.00498335	1	1	2	P48634	P48634 [1083-1100]	2	2687.24	0							No Quan Values	Not Found	Not Found	High	Not Found	Not Found	Not Found	Not Found	Not Found	Not Found	Not Found	High	High	0.001872	0.03025	2.57
FALSE	High	[R].KDTTSDKDDSLGSQQTNEQCAQK.[A]	1xCarbamidomethyl [C20]; 1xPhospho [T/S]; 3xTMT6plex [K1; K7; K23]; 1xTMT6plex [N-Term]	P23497 1xPhospho [T/S]	0.00728825	0.000108793	1	1	9	P23497	P23497 [219-241]	2	3580.76	0							No Quan Values	Not Found	Not Found	Not Found	Not Found	High	High	Not Found	Not Found	Not Found	Not Found	Not Found	High	0.004852	0.07347	2.91
FALSE	High	[R].KDSIHAGGPMK.[S]	1xPhospho [S3]; 2xTMT6plex [K1; K11]; 1xTMT6plex [N-Term]	P48454 1xPhospho [S483]	0.000114684	0	1	1	1	P48454	P48454 [481-491]	1	1908.04	0							No Quan Values	Not Found	Not Found	Not Found	Not Found	Not Found	Not Found	High	Not Found	Not Found	Not Found	Not Found	High	0	1.041e-05	3.5
FALSE	High	[R].TAPSAGMQPQPSLCSSAMR.[K]	1xCarbamidomethyl [C14]; 1xPhospho [S12]; 1xTMT6plex [N-Term]	Q13555 1xPhospho [S419]	0.000156026	0	1	1	1	Q13555	Q13555 [408-426]	0	2286.03	0							No Quan Values	Not Found	Not Found	Not Found	Not Found	Not Found	High	Not Found	Not Found	Not Found	Not Found	Not Found	High	0	1.374e-05	3.87
FALSE	High	[R].RDSSESQLASTESDKPTTGR.[V]	2xPhospho [S4; S]; 1xTMT6plex [K15]; 1xTMT6plex [N-Term]	Q96B23 2xPhospho [S67; S]	0.00202205	0.000108793	1	1	2	Q96B23	Q96B23 [64-83]	1	2770.27	0							No Quan Values	Not Found	Not Found	Not Found	Not Found	Not Found	Not Found	Not Found	Not Found	Not Found	Not Found	High	High	3.165e-05	0.0001251	3.56
FALSE	High	[K].TFCGTPEYLAPEVLEDNDYGR.[A]	1xCarbamidomethyl [C3]; 1xTMT6plex [N-Term]		1.05188e-06	0	1	3	1	P31749	P31749 [308-328]	0	2675.25	0							No Quan Values	Not Found	Not Found	Not Found	Not Found	Not Found	Not Found	Not Found	Not Found	Not Found	High	Not Found	High	0	1.362e-07	4.15
FALSE	High	[R].RPSANCDPFSVTEALIR.[T]	1xCarbamidomethyl [C6]; 1xPhospho [S3]; 1xTMT6plex [N-Term]	P15104 1xPhospho [S343]	0.138117	0.00474234	1	1	1	P15104	P15104 [341-357]	0	2242.09	0							No Quan Values	Not Found	Not Found	Not Found	Not Found	Not Found	High	Not Found	Not Found	Not Found	Not Found	Not Found	High	0.001743	0.0283	3.3
FALSE	High	[K].HLSLPAGQVVPK.[I]	1xPhospho [S3]; 1xTMT6plex [K12]; 1xTMT6plex [N-Term]	Q8IXS8 1xPhospho [S430]	0.00902057	0.000209539	1	1	1	Q8IXS8	Q8IXS8 [428-439]	0	1784.02	0							No Quan Values	Not Found	Not Found	Not Found	Not Found	Not Found	Not Found	High	Not Found	Not Found	Not Found	Not Found	High	6.142e-05	0.000536	3.73
FALSE	High	[R].GVGGSQPPDIDK.[T]	1xTMT6plex [K12]; 1xTMT6plex [N-Term]		6.89624e-05	0	1	1	1	P15144	P15144 [141-152]	0	1627.91	0							No Quan Values	Not Found	Not Found	Not Found	Not Found	Not Found	Not Found	Not Found	Not Found	Not Found	High	Not Found	High	0	6.52e-06	3.76
FALSE	High	[K].GVGDGTVSWGLEDDEDMTLTR.[W]	1xOxidation [M17]; 1xTMT6plex [N-Term]		1.10233e-06	0	1	2	1	Q15819	Q15819 [25-45]	0	2498.16	0							No Quan Values	Not Found	Not Found	Not Found	Not Found	Not Found	Not Found	Not Found	Not Found	Not Found	High	Not Found	High	0	1.423e-07	3.83
FALSE	High	[R].SSSSPTEATEK.[N]	2xPhospho [S3; S4]; 1xTMT6plex [K11]; 1xTMT6plex [N-Term]	Q9UBG0 2xPhospho [S1457; S1458]	0.192013	0.00779766	1	1	1	Q9UBG0	Q9UBG0 [1455-1465]	0	1741.77	0							No Quan Values	Not Found	Not Found	Not Found	Not Found	Not Found	Not Found	Not Found	Not Found	Not Found	Not Found	High	High	0.003075	0.0459	1.72
FALSE	High	[R].SSSSHSPGSPPR.[N]	1xPhospho [S]; 1xTMT6plex [N-Term]	P35670 1xPhospho [S]	0.117257	0.00337449	1	1	4	P35670	P35670 [340-351]	0	1491.68	0							No Quan Values	Not Found	High	High	High	Not Found	Not Found	Not Found	Not Found	Not Found	Not Found	Not Found	High	0.002839	0.04305	1.97
FALSE	High	[K].SSSPAPEFLASSPPDNK.[S]	1xPhospho [S]; 1xTMT6plex [K17]; 1xTMT6plex [N-Term]	Q9Y4F1 1xPhospho [S]	0.000870837	0	1	1	2	Q9Y4F1	Q9Y4F1 [861-877]	0	2269.12	0							No Quan Values	Not Found	Not Found	Not Found	Not Found	Not Found	High	Not Found	Not Found	Not Found	Not Found	Not Found	High	3.165e-05	8.876e-05	3.43
FALSE	High	[R].EGPYSISVLYGDEEVPR.[S]	1xTMT6plex [N-Term]		9.26728e-09	0	1	1	1	P21333	P21333 [1516-1532]	0	2139.08	0							No Quan Values	Not Found	Not Found	Not Found	Not Found	Not Found	Not Found	Not Found	Not Found	Not Found	High	Not Found	High	0	1.688e-09	4.75
FALSE	High	[R].RTSQEGPGDSVK.[F]	1xPhospho [S/T]; 1xTMT6plex [K12]; 1xTMT6plex [N-Term]	Q9NSK0 1xPhospho [S/T]	0.148402	0.00498335	1	1	2	Q9NSK0	Q9NSK0 [517-528]	1	1798.91	0							No Quan Values	Not Found	Not Found	Not Found	Not Found	Not Found	Not Found	High	Not Found	Not Found	Not Found	Not Found	High	0.002712	0.04069	1.64
FALSE	High	[K].EGVILTNESAASTGQPDNDVTEGQR.[A]	1xPhospho [S/T]; 1xTMT6plex [N-Term]	Q08J23 1xPhospho [S/T]	0.141473	0.00498335	1	1	2	Q08J23	Q08J23 [713-737]	0	2897.34	0							No Quan Values	Not Found	Not Found	Not Found	Not Found	Not Found	Not Found	Not Found	Not Found	Not Found	Not Found	High	High	0.001833	0.02948	2.01
FALSE	High	[R].RVSSPMDEVLASLK.[R]	1xPhospho [S]; 1xTMT6plex [K14]; 1xTMT6plex [N-Term]	Q8N9B5 1xPhospho [S]	0.000496504	0	1	1	2	Q8N9B5	Q8N9B5 [886-899]	1	2070.11	0							No Quan Values	Not Found	Not Found	Not Found	Not Found	Not Found	Not Found	Not Found	High	Not Found	Not Found	Not Found	High	0	3.883e-05	3.6
FALSE	High	[R].SSSFSSWDDSSDSYWK.[K]	1xPhospho [S]; 1xTMT6plex [K16]; 1xTMT6plex [N-Term]	Q9NP61 1xPhospho [S]	0.00110786	0.000108793	1	1	2	Q9NP61	Q9NP61 [365-380]	0	2409.03	0							No Quan Values	Not Found	Not Found	Not Found	Not Found	Not Found	High	Not Found	Not Found	Not Found	Not Found	Not Found	High	3.165e-05	0.0003439	3.09
FALSE	High	[R].EHNSMWASLSSPDAEAVEPDFSSIER.[L]	1xPhospho [S]; 1xOxidation [M5]; 1xTMT6plex [N-Term]	Q27J81 1xPhospho [S]	2.36472e-07	0	1	1	3	Q27J81	Q27J81 [579-604]	0	3216.4	0							No Quan Values	Not Found	Not Found	Not Found	High	Not Found	Not Found	Not Found	Not Found	Not Found	Not Found	Not Found	High	0	7.024e-08	4.24
FALSE	High	[K].EKEEVAEEAQSGGD.[-]	1xTMT6plex [K2]; 1xTMT6plex [N-Term]		0.000403508	0	1	1	1	O76070	O76070 [114-127]	1	1935.95	0							No Quan Values	Not Found	Not Found	Not Found	Not Found	Not Found	Not Found	Not Found	Not Found	Not Found	High	Not Found	High	0	3.243e-05	4.29
FALSE	High	[R].SSQTGTEPGAAHTSSPQPSTSR.[G]	1xPhospho [T/S]; 1xTMT6plex [N-Term]	Q9C0C7 1xPhospho [S/T]	3.9836e-05	0	1	1	3	Q9C0C7	Q9C0C7 [1191-1212]	0	2480.13	0							No Quan Values	Not Found	Not Found	High	Not Found	Not Found	Not Found	Not Found	Not Found	Not Found	Not Found	Not Found	High	0	3.936e-06	3.64
FALSE	High	[K].EKQSSEEEEKETR.[G]	1xPhospho [S]; 2xTMT6plex [K2; K10]; 1xTMT6plex [N-Term]	Q92504 1xPhospho [S]	8.54319e-05	0	1	1	2	Q92504	Q92504 [272-284]	2	2376.19	0							No Quan Values	Not Found	Not Found	High	Not Found	Not Found	Not Found	Not Found	Not Found	Not Found	Not Found	Not Found	High	0	7.93e-06	4.44
FALSE	High	[K].SSSSSSASAAAAAAAASSSASCSR.[R]	1xCarbamidomethyl [C22]; 1xTMT6plex [N-Term]		2.97115e-10	0	1	1	1	Q07065	Q07065 [79-102]	0	2319.07	0							No Quan Values	Not Found	Not Found	Not Found	Not Found	Not Found	Not Found	High	Not Found	Not Found	Not Found	Not Found	High	0	6.969e-11	4.83
FALSE	High	[R].SSPVPEMLEESQELLEPVVDDVPK.[T]	1xPhospho [S]; 1xTMT6plex [K24]; 1xTMT6plex [N-Term]	Q5VZ89 1xPhospho [S]	0.0383562	0.00057911	1	1	2	Q5VZ89	Q5VZ89 [1125-1148]	0	3204.6	0							No Quan Values	Not Found	Not Found	Not Found	Not Found	High	Not Found	Not Found	Not Found	Not Found	Not Found	Not Found	High	0.0002417	0.003575	2.67
FALSE	High	[K].GSSPGIQDTLEAEDGAFETDEAPEDR.[I]	1xTMT6plex [N-Term]		7.73711e-10	0	1	1	1	Q9UNX4	Q9UNX4 [239-264]	0	2965.34	0							No Quan Values	Not Found	Not Found	Not Found	Not Found	Not Found	Not Found	Not Found	Not Found	Not Found	High	Not Found	High	0	1.698e-10	6.76
FALSE	High	[K].EKYIDQEELNK.[T]	2xTMT6plex [K2; K11]; 1xTMT6plex [N-Term]		0.00983618	0.000209539	2	4	1	P07900; P08238	P07900 [282-292]; P08238 [274-284]	1	2096.18	0							No Quan Values	Not Found	Not Found	Not Found	Not Found	Not Found	Not Found	Not Found	Not Found	Not Found	High	Not Found	High	6.142e-05	0.0005903	2.41
FALSE	High	[K].ELDDISQEIAQLQR.[E]	1xTMT6plex [N-Term]		0.000330126	0	1	1	1	Q9UBC2	Q9UBC2 [385-398]	0	1887	0							No Quan Values	Not Found	Not Found	Not Found	Not Found	Not Found	Not Found	Not Found	Not Found	Not Found	High	Not Found	High	0	2.71e-05	3.2
FALSE	High	[R].SSPNPFITGLTR.[T]	1xPhospho [S]; 1xTMT6plex [N-Term]	O43426 1xPhospho [S]	0.0871074	0.0025315	1	1	2	O43426	O43426 [1391-1402]	0	1598.81	0							No Quan Values	Not Found	Not Found	Not Found	Not Found	Not Found	Not Found	High	Not Found	Not Found	Not Found	Not Found	High	0.0009113	0.01342	2.37
FALSE	High	[R].SSPKEELHPAAPSQLAPSFSSSSSSSSGPR.[S]	2xPhospho [S2; S13]; 1xTMT6plex [K4]; 1xTMT6plex [N-Term]	O43166 2xPhospho [S1443; S1454]	0.202156	0.00852602	1	1	1	O43166	O43166 [1442-1471]	1	3617.69	0							No Quan Values	Not Found	Not Found	Not Found	Not Found	High	Not Found	Not Found	Not Found	Not Found	Not Found	Not Found	High	0.003368	0.04955	2.93
FALSE	High	[K].SALEAESESLDSFTADSDSTSR.[R]	3xPhospho [S17; S19; S21]; 1xTMT6plex [N-Term]	Q96C24 3xPhospho [S209; S211; S213]	0.1076	0.00303607	1	1	1	Q96C24	Q96C24 [193-214]	0	2774.06	0							No Quan Values	Not Found	High	Not Found	Not Found	Not Found	Not Found	Not Found	Not Found	Not Found	Not Found	Not Found	High	0.001084	0.01875	0.68
FALSE	High	[R].SALEDKERDEDDEDGDGDGDGATGK.[K]	2xTMT6plex [K6; K25]; 1xTMT6plex [N-Term]		0.049408	0.000948301	1	1	1	P50579	P50579 [74-98]	2	3283.53	0							No Quan Values	Not Found	Not Found	Not Found	Not Found	Not Found	Not Found	Not Found	Not Found	Not Found	High	Not Found	High	0.0003407	0.005351	2.87
FALSE	High	[R].ELEAELEDER.[K]	1xTMT6plex [N-Term]		0.000969182	0	1	1	1	P35580	P35580 [1600-1609]	0	1461.73	0							No Quan Values	Not Found	Not Found	Not Found	Not Found	Not Found	Not Found	Not Found	Not Found	Not Found	High	Not Found	High	0	6.853e-05	3.35
FALSE	High	[R].GSPGEEWAPEVGEDAPQR.[L]	1xPhospho [S2]; 1xTMT6plex [N-Term]	Q9NZ56 1xPhospho [S361]	0.000108706	0	1	1	1	Q9NZ56	Q9NZ56 [360-377]	0	2219.98	0							No Quan Values	Not Found	Not Found	Not Found	Not Found	Not Found	Not Found	Not Found	Not Found	Not Found	Not Found	High	High	0	9.922e-06	3.64
FALSE	High	[KR].ELEELR.[SLAKNQDT]	1xTMT6plex [N-Term]		0.202156	0.00852602	4	12	4	Q13188; P61129; O43290; Q14980	Q13188 [462-467]; P61129 [377-382]; O43290 [364-369]; Q14980 [277-282]; [1079-1084]	0	1017.58	0							No Quan Values	Not Found	Not Found	Not Found	Not Found	Not Found	Not Found	Not Found	Not Found	Not Found	Not Found	High	High	0.003368	0.04956	1.76
FALSE	High	[R].ELEQANDDLER.[A]	1xTMT6plex [N-Term]		9.38233e-05	0	2	2	1	Q9NXR1; Q9GZM8	Q9NXR1 [116-126]; Q9GZM8 [117-127]	0	1560.77	0							No Quan Values	Not Found	Not Found	Not Found	Not Found	Not Found	Not Found	Not Found	Not Found	Not Found	High	Not Found	High	0	8.634e-06	4.24
FALSE	High	[R].SSLVDEHPEDAEFEQK.[I]	1xPhospho [S]; 1xTMT6plex [K16]; 1xTMT6plex [N-Term]	Q15154 1xPhospho [S]	0.00084785	0	1	1	2	Q15154	Q15154 [643-658]	0	2398.12	0							No Quan Values	High	Not Found	Not Found	Not Found	Not Found	Not Found	Not Found	Not Found	Not Found	Not Found	Not Found	High	0	6.139e-05	2.88
FALSE	High	[K].SSILLDVKPWDDETDMAQLEACVR.[S]	1xCarbamidomethyl [C22]; 1xTMT6plex [K8]; 1xTMT6plex [N-Term]		0.00164361	0.000108793	1	1	1	P29692	P29692 [196-219]	0	3249.65	0							No Quan Values	Not Found	Not Found	Not Found	Not Found	Not Found	Not Found	Not Found	Not Found	Not Found	High	Not Found	High	3.165e-05	0.0001052	3.1
FALSE	High	[K].EILSEVER.[N]	1xTMT6plex [N-Term]		0.0910055	0.0025315	1	1	1	P49368	P49368 [382-389]	0	1203.68	0							No Quan Values	Not Found	Not Found	Not Found	Not Found	Not Found	Not Found	Not Found	Not Found	Not Found	High	Not Found	High	0.0009331	0.01434	2.46
FALSE	High	[K].SADGSAPAGEGEGVTLQR.[N]	1xTMT6plex [N-Term]		4.87071e-06	0	1	1	1	Q01650	Q01650 [31-48]	0	1930.97	0							No Quan Values	Not Found	Not Found	Not Found	Not Found	Not Found	Not Found	Not Found	Not Found	Not Found	High	Not Found	High	0	5.624e-07	3.77
FALSE	High	[R].STTSQVTPAEEKDGHSPMSK.[G]	1xPhospho [S16]; 2xTMT6plex [K12; K20]; 1xTMT6plex [N-Term]	P78559 1xPhospho [S2664]	0.00129203	0.000108793	1	1	1	P78559	P78559 [2649-2668]	1	2884.44	0							No Quan Values	Not Found	Not Found	Not Found	Not Found	High	Not Found	Not Found	Not Found	Not Found	Not Found	Not Found	High	3.165e-05	8.648e-05	3.79
FALSE	High	[K].EGEEPQASAQDETPITSAK.[E]	1xTMT6plex [K19]; 1xTMT6plex [N-Term]		1.28545e-05	0	1	1	1	Q02952	Q02952 [1597-1615]	0	2446.23	0							No Quan Values	Not Found	Not Found	Not Found	Not Found	Not Found	Not Found	Not Found	Not Found	Not Found	High	Not Found	High	0	1.384e-06	4.41
FALSE	High	[K].EGDELEDNGKNFYESDDDQKEK.[T]	1xPhospho [S15]; 3xTMT6plex [K10; K20; K22]; 1xTMT6plex [N-Term]	O00203 1xPhospho [S276]	0.0120888	0.000209539	1	1	1	O00203	O00203 [262-283]	2	3600.7	0							No Quan Values	Not Found	Not Found	Not Found	Not Found	Not Found	Not Found	Not Found	Not Found	Not Found	Not Found	High	High	0.0001195	0.0007536	3.5
FALSE	High	[R].STSTLYSQFQTAESENR.[S]	1xPhospho [S1]; 1xTMT6plex [N-Term]	O95248 1xPhospho [S1747]	9.1345e-05	0	1	1	1	O95248	O95248 [1747-1763]	0	2258.02	0							No Quan Values	Not Found	Not Found	Not Found	Not Found	High	Not Found	Not Found	Not Found	Not Found	Not Found	Not Found	High	0	8.428e-06	3.97
FALSE	High	[K].EEEELAYDWSDNNSNISAK.[R]	1xTMT6plex [K19]; 1xTMT6plex [N-Term]		0.0223909	0.000295797	1	1	1	Q9UPN3	Q9UPN3 [700-718]	0	2672.27	0							No Quan Values	Not Found	Not Found	Not Found	Not Found	Not Found	Not Found	Not Found	Not Found	Not Found	High	Not Found	High	0.0001658	0.00162	2.22
FALSE	High	[K].STSMDSGSSESPASLKR.[V]	1xPhospho [T/S]; 1xTMT6plex [K16]; 1xTMT6plex [N-Term]	Q15811 1xPhospho [S]	0.000114684	0	1	1	2	Q15811	Q15811 [976-992]	1	2265.08	0							No Quan Values	Not Found	Not Found	Not Found	Not Found	High	Not Found	Not Found	Not Found	Not Found	Not Found	Not Found	High	0	1.04e-05	3.76
FALSE	High	[R].STQGVTLTDLQEAEK.[T]	1xTMT6plex [K15]; 1xTMT6plex [N-Term]		0.023918	0.000295797	1	1	1	O14974	O14974 [695-709]	0	2078.14	0							No Quan Values	Not Found	Not Found	Not Found	Not Found	Not Found	Not Found	Not Found	Not Found	Not Found	High	Not Found	High	0.0001658	0.001782	2.73
FALSE	High	[K].RPSVDSLVSK.[F]	1xPhospho [S3]; 1xTMT6plex [K10]; 1xTMT6plex [N-Term]	Q70E73 1xPhospho [S996]	0.000107981	0	1	1	1	Q70E73	Q70E73 [994-1003]	0	1625.9	0							No Quan Values	Not Found	Not Found	Not Found	Not Found	Not Found	High	Not Found	Not Found	Not Found	Not Found	Not Found	High	0	9.82e-06	4.17
FALSE	High	[R].STPLASPSPSPGRSPQR.[L]	1xPhospho [S14]; 1xTMT6plex [N-Term]	Q8WYP5 1xPhospho [S1222]	0.0634809	0.00158026	1	1	1	Q8WYP5	Q8WYP5 [1209-1225]	1	2031.02	0							No Quan Values	Not Found	Not Found	Not Found	Not Found	Not Found	High	Not Found	Not Found	Not Found	Not Found	Not Found	High	0.0005341	0.007996	3.02
FALSE	High	[R].STPESGDSDKESVGSSSTSNEGGR.[R]	2xPhospho [S5; S8]; 1xTMT6plex [K10]; 1xTMT6plex [N-Term]	Q6GQQ9 2xPhospho [S464; S467]	0.00478712	0.000108793	1	1	1	Q6GQQ9	Q6GQQ9 [460-483]	1	2975.26	0							No Quan Values	Not Found	Not Found	Not Found	Not Found	Not Found	Not Found	Not Found	Not Found	Not Found	Not Found	High	High	3.165e-05	0.0002734	3.47
FALSE	High	[RQ].HGSGSGQSPSPSR.[G]	1xPhospho [S]; 1xTMT6plex [N-Term]	Q86YZ3 1xPhospho [S]; 1xPhospho [S]; 1xPhospho [S]; 1xPhospho [S]; 1xPhospho [S]	0.0334396	0.000389981	1	1	3	Q86YZ3	Q86YZ3 [533-545]; [999-1011]; [1469-1481]; [1939-1951]; [2409-2421]	0	1549.7	0							No Quan Values	Not Found	Not Found	High	Not Found	Not Found	Not Found	Not Found	Not Found	Not Found	Not Found	High	High	0.0001904	0.002893	2.3
FALSE	High	[R].EEIQSSISGVTAAYNR.[E]	1xTMT6plex [N-Term]		4.06649e-07	0	1	1	1	P46940	P46940 [723-738]	0	1954.01	0							No Quan Values	Not Found	Not Found	Not Found	Not Found	Not Found	Not Found	Not Found	Not Found	Not Found	High	Not Found	High	0	5.627e-08	5.05
FALSE	High	[K].EEPPPLTPPAR.[C]	1xPhospho [T7]; 1xTMT6plex [N-Term]	Q9C0C2 1xPhospho [T131]	0.198727	0.00845485	1	1	1	Q9C0C2	Q9C0C2 [125-135]	0	1512.77	0							No Quan Values	Not Found	Not Found	Not Found	Not Found	Not Found	Not Found	Not Found	Not Found	Not Found	Not Found	High	High	0.003312	0.04824	2.31
FALSE	High	[K].STLESEKPGSPEAAETSPPSNIIDHCEK.[L]	1xCarbamidomethyl [C26]; 1xPhospho [S10]; 2xTMT6plex [K7; K28]; 1xTMT6plex [N-Term]	Q96T23 1xPhospho [S622]	2.57968e-07	0	1	1	1	Q96T23	Q96T23 [613-640]	0	3777.85	0							No Quan Values	Not Found	Not Found	Not Found	Not Found	High	Not Found	Not Found	Not Found	Not Found	Not Found	Not Found	High	0	3.686e-08	5.61
FALSE	High	[R].HEHPPNPPVSPGK.[T]	1xPhospho [S10]; 1xTMT6plex [K13]; 1xTMT6plex [N-Term]	Q6VMQ6 1xPhospho [S673]	0.000284937	0	1	1	1	Q6VMQ6	Q6VMQ6 [664-676]	0	1930.99	0							No Quan Values	Not Found	Not Found	Not Found	Not Found	High	Not Found	Not Found	Not Found	Not Found	Not Found	Not Found	High	0	2.37e-05	4.17
FALSE	High	[K].STGDIAGTVVPETNKEPR.[Y]	1xPhospho [S/T]; 1xTMT6plex [K15]; 1xTMT6plex [N-Term]	Q9UDY2 1xPhospho [S/T]	0.00101563	0	1	1	2	Q9UDY2	Q9UDY2 [461-478]	1	2409.24	0							No Quan Values	Not Found	Not Found	Not Found	Not Found	High	Not Found	Not Found	Not Found	Not Found	Not Found	Not Found	High	0	7.123e-05	4.37
FALSE	High	[R].RRSPSPPPTR.[R]	2xPhospho [S3; S5]; 1xTMT6plex [N-Term]	Q8IYB3 2xPhospho [S549; S551]	0.146642	0.00498335	1	1	1	Q8IYB3	Q8IYB3 [547-556]	2	1539.74	0							No Quan Values	High	Not Found	Not Found	Not Found	Not Found	Not Found	Not Found	Not Found	Not Found	Not Found	Not Found	High	0.001872	0.03098	1.76
FALSE	High	[R].GVQKPAGPSTSPDGNSR.[C]	1xPhospho [T/S]; 1xTMT6plex [K4]; 1xTMT6plex [N-Term]	Q86YV5 1xPhospho [S/T]	0.0148526	0.000295797	1	1	2	Q86YV5	Q86YV5 [138-154]	0	2193.11	0							No Quan Values	Not Found	Not Found	Not Found	Not Found	Not Found	Not Found	High	Not Found	Not Found	Not Found	Not Found	High	0.000144	0.0009627	2.81
FALSE	High	[R].RSEDEPPAASASAAPPPQR.[D]	1xPhospho [S2]; 1xTMT6plex [N-Term]	Q96IZ0 1xPhospho [S108]	0.000128503	0	1	1	2	Q96IZ0	Q96IZ0 [107-125]	1	2243.07	0							No Quan Values	High	Not Found	Not Found	Not Found	Not Found	Not Found	Not Found	Not Found	Not Found	Not Found	High	High	0	1.152e-05	3.55
FALSE	High	[R].RSPLGQK.[R]	1xPhospho [S2]; 1xTMT6plex [K7]; 1xTMT6plex [N-Term]	P54278 1xPhospho [S445]	0.114421	0.00328961	1	2	1	P54278	P54278 [444-450]	1	1323.76	0							No Quan Values	Not Found	Not Found	Not Found	Not Found	Not Found	High	Not Found	Not Found	Not Found	Not Found	Not Found	High	0.001175	0.0209	1.73
FALSE	High	[R].SSWHQSSFHSTR.[T]	1xPhospho [S7]; 1xTMT6plex [N-Term]	Q99959 1xPhospho [S294]	0.0313195	0.000389981	1	1	1	Q99959	Q99959 [288-299]	0	1755.78	0							No Quan Values	Not Found	Not Found	Not Found	Not Found	Not Found	High	Not Found	Not Found	Not Found	Not Found	Not Found	High	0.0001904	0.00262	1.86
FALSE	High	[R].EESPYCVVCFETLFANTCEECGKPIGCDCK.[D]	6xCarbamidomethyl [C6; C9; C18; C21; C27; C29]; 2xTMT6plex [K23; K30]; 1xTMT6plex [N-Term]		4.43505e-06	0	1	1	1	Q14192	Q14192 [23-52]	0	4346.98	0							No Quan Values	Not Found	Not Found	Not Found	Not Found	Not Found	Not Found	Not Found	Not Found	Not Found	High	Not Found	High	0	5.15e-07	5.87
FALSE	High	[R].EESWESGR.[S]	1xPhospho [S3]; 1xTMT6plex [N-Term]	Q9NQ29 1xPhospho [S336]	0.0999081	0.00260894	1	1	1	Q9NQ29	Q9NQ29 [334-341]	0	1288.54	0							No Quan Values	Not Found	Not Found	Not Found	Not Found	Not Found	Not Found	Not Found	Not Found	Not Found	Not Found	High	High	0.0009961	0.01673	2.44
FALSE	High	[K].GYSWSQFSDVEENR.[T]	1xTMT6plex [N-Term]		8.3759e-06	0	1	1	1	Q07817	Q07817 [21-34]	0	1932.89	0							No Quan Values	Not Found	Not Found	Not Found	Not Found	Not Found	Not Found	Not Found	Not Found	Not Found	High	Not Found	High	0	9.257e-07	4.1
FALSE	High	[K].EFAELLNEVENER.[M]	1xTMT6plex [N-Term]		0.0169591	0.000295797	1	1	1	O60890	O60890 [89-101]	0	1820.92	0							No Quan Values	Not Found	Not Found	Not Found	Not Found	Not Found	Not Found	Not Found	Not Found	Not Found	High	Not Found	High	0.000144	0.00113	2.52
FALSE	High	[R].GYSFSLTTFSPSGK.[L]	1xPhospho [S]; 1xTMT6plex [K14]; 1xTMT6plex [N-Term]	P25787 1xPhospho [S]	0.0125806	0.000209539	1	1	2	P25787	P25787 [5-18]	0	2017.01	0							No Quan Values	Not Found	Not Found	Not Found	Not Found	Not Found	Not Found	Not Found	High	Not Found	Not Found	Not Found	High	0.0001195	0.0007854	3.12
FALSE	High	[K].RSPTGSTTSR.[A]	1xPhospho [S2]; 1xTMT6plex [N-Term]	Q7Z460 1xPhospho [S572]	0.00459915	0.000108793	1	1	2	Q7Z460	Q7Z460 [571-580]	1	1358.66	0							No Quan Values	Not Found	High	High	Not Found	Not Found	Not Found	Not Found	Not Found	Not Found	Not Found	Not Found	High	3.165e-05	0.0002629	2.16
FALSE	High	[K].EFDEDSEDRLVNEK.[F]	1xPhospho [S6]; 1xTMT6plex [K14]; 1xTMT6plex [N-Term]	Q9UHD8 1xPhospho [S482]	0.00424503	0.000108793	1	1	1	Q9UHD8	Q9UHD8 [477-490]	1	2263.05	0							No Quan Values	Not Found	Not Found	Not Found	Not Found	Not Found	Not Found	Not Found	Not Found	Not Found	Not Found	High	High	3.165e-05	0.0002417	2.68
FALSE	High	[CR].GYFDEEMNR.[IV]	1xTMT6plex [N-Term]		0.00010726	0	1	2	1	Q15149	Q15149 [2970-2978]	0	1389.63	0							No Quan Values	Not Found	Not Found	Not Found	Not Found	Not Found	Not Found	Not Found	Not Found	Not Found	High	Not Found	High	0	9.787e-06	3.75
FALSE	High	[K].EFLPEGQDIGAFVAEQK.[V]	1xTMT6plex [K17]; 1xTMT6plex [N-Term]		1.64707e-06	0	1	1	1	Q04637	Q04637 [1405-1421]	0	2336.25	0							No Quan Values	Not Found	Not Found	Not Found	Not Found	Not Found	Not Found	Not Found	Not Found	Not Found	High	Not Found	High	0	2.053e-07	4.85
FALSE	High	[R].RSSLPPNSPKPVR.[L]	1xPhospho [S]; 1xTMT6plex [K10]; 1xTMT6plex [N-Term]	Q7Z401 1xPhospho [S]	0.00580942	0.000108793	1	1	2	Q7Z401	Q7Z401 [1249-1261]	1	1973.11	0							No Quan Values	Not Found	Not Found	Not Found	Not Found	Not Found	Not Found	Not Found	High	Not Found	Not Found	Not Found	High	3.165e-05	0.0003336	3.15
FALSE	High	[R].SSSYSEANEPDLQMANGGK.[S]	1xPhospho [S]; 1xTMT6plex [K19]; 1xTMT6plex [N-Term]	Q5VWQ8 1xPhospho [S]	0.00213311	0.000108793	1	1	3	Q5VWQ8	Q5VWQ8 [726-744]	0	2523.15	0							No Quan Values	Not Found	Not Found	Not Found	High	Not Found	Not Found	Not Found	Not Found	Not Found	Not Found	Not Found	High	3.165e-05	0.0001382	3.18
FALSE	High	[R].GVSMPNMLEPK.[I]	1xPhospho [S3]; 1xTMT6plex [K11]; 1xTMT6plex [N-Term]	O14639 1xPhospho [S706]	0.0772961	0.00210549	1	1	1	O14639	O14639 [704-714]	0	1740.88	0							No Quan Values	Not Found	Not Found	Not Found	Not Found	Not Found	Not Found	High	Not Found	Not Found	Not Found	Not Found	High	0.0007474	0.01105	2.95
FALSE	High	[R].STEPELIQVK.[S]	1xPhospho [T/S]; 1xTMT6plex [K10]; 1xTMT6plex [N-Term]	Q15758 1xPhospho [S/T]	0.0343262	0.000389981	1	1	2	Q15758	Q15758 [493-502]	0	1681.92	0							No Quan Values	Not Found	Not Found	Not Found	Not Found	High	Not Found	Not Found	Not Found	Not Found	Not Found	Not Found	High	0.0001904	0.00302	2.78
FALSE	High	[K].VLHSSNPVPLYAPNLSPPADSR.[I]	1xPhospho [S]; 1xTMT6plex [N-Term]	Q92610 1xPhospho [S]	5.35048e-07	0	1	1	2	Q92610	Q92610 [558-579]	0	2640.34	0							No Quan Values	Not Found	Not Found	Not Found	Not Found	Not Found	Not Found	High	Not Found	Not Found	Not Found	Not Found	High	0	7.279e-08	5.72
FALSE	High	[R].FTGSFDDDPDPHRDPYGEEVDRR.[S]	1xPhospho [S4]; 1xTMT6plex [N-Term]	O15027 1xPhospho [S1327]	0.0364056	0.000484649	1	1	1	O15027	O15027 [1324-1346]	2	3031.31	0							No Quan Values	Not Found	Not Found	Not Found	Not Found	Not Found	Not Found	Not Found	Not Found	Not Found	Not Found	High	High	0.000216	0.003296	4.44
FALSE	High	[K].YDYNSGEELESYK.[G]	1xTMT6plex [K13]; 1xTMT6plex [N-Term]		6.71768e-07	0	1	1	1	Q9Y3F4	Q9Y3F4 [250-262]	0	2055	0							No Quan Values	Not Found	Not Found	Not Found	Not Found	Not Found	Not Found	Not Found	Not Found	Not Found	High	Not Found	High	0	8.946e-08	4.42
FALSE	High	[K].YEWDVAEAR.[K]	1xTMT6plex [N-Term]		0.00354459	0.000108793	1	1	1	P13639	P13639 [639-647]	0	1367.68	0							No Quan Values	Not Found	Not Found	Not Found	Not Found	Not Found	Not Found	Not Found	Not Found	Not Found	High	Not Found	High	3.165e-05	0.0002049	3.08
FALSE	High	[K].LSENNIQTIFAVTEEFQPVYK.[E]	1xTMT6plex [K21]; 1xTMT6plex [N-Term]		1.12441e-05	0	1	1	1	P05556	P05556 [326-346]	0	2928.58	0							No Quan Values	Not Found	Not Found	Not Found	Not Found	Not Found	Not Found	Not Found	Not Found	Not Found	High	Not Found	High	0	1.219e-06	4.23
FALSE	High	[K].ALTDDSDENEEEDAFTDQK.[I]	1xPhospho [S6]; 1xTMT6plex [K19]; 1xTMT6plex [N-Term]	Q8NI35 1xPhospho [S1212]	1.46994e-06	0	1	1	2	Q8NI35	Q8NI35 [1207-1225]	0	2710.17	0							No Quan Values	Not Found	High	High	Not Found	Not Found	Not Found	Not Found	Not Found	Not Found	Not Found	Not Found	High	0	1.857e-07	4.49
FALSE	High	[K].VNFSEEGETEEDDQDSSHSSVTTVK.[A]	2xPhospho [S16; S]; 1xTMT6plex [K25]; 1xTMT6plex [N-Term]	Q5JTV8 2xPhospho [S227; S]	0.125388	0.00397712	1	1	2	Q5JTV8	Q5JTV8 [212-236]	0	3374.42	0							No Quan Values	Not Found	Not Found	High	Not Found	Not Found	Not Found	Not Found	Not Found	Not Found	Not Found	Not Found	High	0.00145	0.02416	1.64
FALSE	High	[R].AEVLGHKTPEPAPR.[R]	1xPhospho [T8]; 1xTMT6plex [K7]; 1xTMT6plex [N-Term]	Q9UHD8 1xPhospho [T142]	0.137289	0.00466052	1	1	1	Q9UHD8	Q9UHD8 [135-148]	1	2040.1	0							No Quan Values	Not Found	Not Found	Not Found	Not Found	Not Found	High	Not Found	Not Found	Not Found	Not Found	Not Found	High	0.00172	0.02808	2.37
FALSE	High	[K].LVTSPQSEPPAPFPPPR.[S]	1xPhospho [T/S]; 1xTMT6plex [N-Term]	Q9H792 1xPhospho [S/T]	9.31975e-05	0	1	1	2	Q9H792	Q9H792 [858-874]	0	2126.09	0							No Quan Values	Not Found	Not Found	Not Found	Not Found	Not Found	High	Not Found	Not Found	Not Found	Not Found	Not Found	High	0	8.58e-06	3.92
FALSE	High	[K].YAELLVSQGVVNQPEYEEEISK.[Y]	1xTMT6plex [K22]; 1xTMT6plex [N-Term]		3.15331e-07	0	1	1	2	Q02218	Q02218 [540-561]	0	2982.57	0							No Quan Values	Not Found	Not Found	Not Found	Not Found	Not Found	Not Found	Not Found	Not Found	Not Found	High	Not Found	High	0	4.442e-08	5.22
FALSE	High	[K].IISIFSGTEK.[G]	1xPhospho [S6]; 1xTMT6plex [K10]; 1xTMT6plex [N-Term]	Q13177 1xPhospho [S58]	0.00779066	0.000108793	1	1	1	Q13177	Q13177 [53-62]	0	1632.9	0							No Quan Values	Not Found	Not Found	Not Found	Not Found	Not Found	Not Found	Not Found	High	Not Found	Not Found	Not Found	High	3.165e-05	0.0004557	3
FALSE	High	[R].AAPTTPPPPVKR.[R]	1xPhospho [T]; 1xTMT6plex [K11]; 1xTMT6plex [N-Term]	Q9NZQ3 1xPhospho [T]	0.00504972	0.000108793	1	1	2	Q9NZQ3	Q9NZQ3 [177-188]	1	1770.01	0							No Quan Values	Not Found	Not Found	Not Found	Not Found	Not Found	High	Not Found	Not Found	Not Found	Not Found	Not Found	High	6.142e-05	0.0006145	2.8
FALSE	High	[R].LSGAEPDDEEYQEFEEMLEHAESAQDFASR.[A]	1xTMT6plex [N-Term]		1.85794e-06	0	1	1	1	Q96GC9	Q96GC9 [214-243]	0	3688.61	0							No Quan Values	Not Found	Not Found	Not Found	Not Found	Not Found	Not Found	Not Found	Not Found	Not Found	High	Not Found	High	0	2.298e-07	4.83
FALSE	High	[R].INNVPAEGENEVNNELANR.[M]	1xTMT6plex [N-Term]		1.21994e-10	0	1	1	1	Q9NUQ9	Q9NUQ9 [168-186]	0	2325.16	0							No Quan Values	Not Found	Not Found	Not Found	Not Found	Not Found	Not Found	Not Found	Not Found	Not Found	High	Not Found	High	0	3.06e-11	6.18
FALSE	High	[K].MGAPESGLAEYLFDK.[H]	1xTMT6plex [K15]; 1xTMT6plex [N-Term]		2.21052e-05	0	1	1	1	P02794	P02794 [159-173]	0	2086.09	0							No Quan Values	Not Found	Not Found	Not Found	Not Found	Not Found	Not Found	Not Found	Not Found	Not Found	High	Not Found	High	0	2.277e-06	3.88
FALSE	High	[R].APSLTNDEVEEFR.[A]	1xPhospho [S3]; 1xTMT6plex [N-Term]	Q13206 1xPhospho [S539]	0.00596656	0.000108793	1	1	1	Q13206	Q13206 [537-549]	0	1815.84	0							No Quan Values	Not Found	Not Found	Not Found	Not Found	Not Found	Not Found	Not Found	Not Found	Not Found	Not Found	High	High	3.165e-05	0.0003414	2.15
FALSE	High	[K].LTPEEEEILNK.[K]	1xPhospho [T2]; 1xTMT6plex [K11]; 1xTMT6plex [N-Term]	P62241 1xPhospho [T130]	0.00139996	0.000108793	1	1	1	P62241	P62241 [129-139]	0	1852.97	0							No Quan Values	Not Found	Not Found	High	Not Found	Not Found	Not Found	Not Found	Not Found	Not Found	Not Found	Not Found	High	3.165e-05	9.251e-05	3.59
FALSE	High	[K].AGTEEAIVYSDIDLK.[K]	1xPhospho [Y9]; 1xTMT6plex [K15]; 1xTMT6plex [N-Term]	Q9NQR4 1xPhospho [Y243]	0.0448352	0.000856746	1	1	1	Q9NQR4	Q9NQR4 [235-249]	0	2162.1	0							No Quan Values	Not Found	Not Found	Not Found	Not Found	Not Found	Not Found	Not Found	Not Found	Not Found	High	Not Found	High	0.0003161	0.004582	2.91
FALSE	High	[R].AEGEWEDQEALDYFSDK.[E]	1xPhospho [S15]; 1xTMT6plex [K17]; 1xTMT6plex [N-Term]	Q9NYF8 1xPhospho [S385]	3.53242e-06	0	1	1	1	Q9NYF8	Q9NYF8 [371-387]	0	2570.14	0							No Quan Values	Not Found	Not Found	High	Not Found	Not Found	Not Found	Not Found	Not Found	Not Found	Not Found	Not Found	High	0	4.17e-07	4.34
FALSE	High	[R].APSHMSSSHSFPQLAR.[N]	1xPhospho [S10]; 1xOxidation [M5]; 1xTMT6plex [N-Term]	Q9Y2J4 1xPhospho [S183]	0.00349755	0.000108793	1	1	1	Q9Y2J4	Q9Y2J4 [174-189]	0	2064.95	0							No Quan Values	Not Found	Not Found	Not Found	Not Found	Not Found	High	Not Found	Not Found	Not Found	Not Found	Not Found	High	3.165e-05	0.0002022	3.16
FALSE	High	[K].AETPTAAEDDNEGDK.[K]	1xTMT6plex [K15]; 1xTMT6plex [N-Term]		0.0454205	0.000856746	1	1	1	O60841	O60841 [299-313]	0	2020.97	0							No Quan Values	Not Found	Not Found	Not Found	Not Found	Not Found	Not Found	Not Found	Not Found	Not Found	High	Not Found	High	0.0003161	0.004663	2.49
FALSE	High	[R].ALTVPELTQQMFDAK.[N]	1xTMT6plex [K15]; 1xTMT6plex [N-Term]		0.000379927	0	2	3	1	Q13509; P68371	Q13509 [283-297]; P68371 [283-297]	0	2150.19	0							No Quan Values	Not Found	Not Found	Not Found	Not Found	Not Found	Not Found	Not Found	Not Found	Not Found	High	Not Found	High	0	3.061e-05	3.64
FALSE	High	[K].VSVLCQENYLIQEGEEITCK.[D]	2xCarbamidomethyl [C5; C19]; 1xTMT6plex [K20]; 1xTMT6plex [N-Term]		9.51169e-06	0	1	1	1	P08603	P08603 [835-854]	0	2870.47	0							No Quan Values	Not Found	Not Found	Not Found	Not Found	Not Found	Not Found	Not Found	Not Found	Not Found	High	Not Found	High	0	1.047e-06	3.93
FALSE	High	[K].APSEEELHGDQTDFGQGSQSPQKQEEQR.[Q]	1xPhospho [S]; 1xTMT6plex [K23]; 1xTMT6plex [N-Term]	Q8TE77 1xPhospho [S]	0.0812943	0.00245983	1	1	2	Q8TE77	Q8TE77 [68-95]	1	3680.69	0							No Quan Values	Not Found	Not Found	High	Not Found	Not Found	Not Found	Not Found	Not Found	Not Found	Not Found	Not Found	High	0.0008413	0.01198	3.61
FALSE	High	[R].NMAPGAVCSPGESK.[E]	1xCarbamidomethyl [C8]; 1xPhospho [S9]; 1xOxidation [M2]; 1xTMT6plex [K14]; 1xTMT6plex [N-Term]	Q9C0C2 1xPhospho [S1297]	0.000712523	0	1	1	1	Q9C0C2	Q9C0C2 [1289-1302]	0	1958.91	0							No Quan Values	Not Found	Not Found	Not Found	Not Found	High	Not Found	Not Found	Not Found	Not Found	Not Found	Not Found	High	0	5.309e-05	3.32
FALSE	High	[K].YPALTKPENQDIDWTLLEGETR.[E]	1xTMT6plex [K6]; 1xTMT6plex [N-Term]		0.000406216	0	1	1	1	P13797	P13797 [377-398]	0	3047.61	0							No Quan Values	Not Found	Not Found	Not Found	Not Found	Not Found	Not Found	Not Found	Not Found	Not Found	High	Not Found	High	0	3.253e-05	3.4
FALSE	High	[K].NIEDVIAQGIGK.[L]	1xTMT6plex [K12]; 1xTMT6plex [N-Term]		0.00515185	0.000108793	1	1	1	P05387	P05387 [50-61]	0	1715.01	0							No Quan Values	Not Found	Not Found	Not Found	Not Found	Not Found	Not Found	Not Found	High	Not Found	Not Found	Not Found	High	3.165e-05	0.0002932	2.12
FALSE	High	[KR].NMMAACDPR.[H]	1xCarbamidomethyl [C6]; 1xTMT6plex [N-Term]		0.177085	0.00689042	5	9	1	Q13885; Q13509; Q9BUF5; P07437; P68371	Q13885 [298-306]; Q13509 [298-306]; Q9BUF5 [298-306]; P07437 [298-306]; P68371 [298-306]	0	1294.59	0							No Quan Values	Not Found	Not Found	Not Found	Not Found	Not Found	Not Found	High	Not Found	Not Found	Not Found	Not Found	High	0.002733	0.04125	1.45
FALSE	High	[R].LSTGTTVEDVQK.[I]	1xPhospho [S/T]; 1xTMT6plex [K12]; 1xTMT6plex [N-Term]	Q86SQ0 1xPhospho [S/T]	0.055487	0.00112764	1	1	2	Q86SQ0	Q86SQ0 [467-478]	0	1815.95	0							No Quan Values	Not Found	Not Found	Not Found	Not Found	High	Not Found	Not Found	Not Found	Not Found	Not Found	Not Found	High	0.001833	0.02952	3.07
FALSE	High	[R].AGSPLCNSNLQDSEEDIEPSYSLFR.[E]	1xCarbamidomethyl [C6]; 1xPhospho [S3]; 1xTMT6plex [N-Term]	Q9NRY4 1xPhospho [S975]	0.00011701	0	1	1	1	Q9NRY4	Q9NRY4 [973-997]	0	3137.4	0							No Quan Values	Not Found	Not Found	Not Found	High	Not Found	Not Found	Not Found	Not Found	Not Found	Not Found	Not Found	High	0	1.059e-05	3.56
FALSE	High	[R].ALSVLGCGHTSSTK.[C]	1xCarbamidomethyl [C7]; 1xPhospho [S3]; 1xTMT6plex [K14]; 1xTMT6plex [N-Term]	Q5T4S7 1xPhospho [S3860]	0.000138319	0	1	1	1	Q5T4S7	Q5T4S7 [3858-3871]	0	1956	0							No Quan Values	Not Found	Not Found	Not Found	Not Found	Not Found	Not Found	High	Not Found	Not Found	Not Found	Not Found	High	0	1.23e-05	3.5
FALSE	High	[K].MCDFGISGYLVDSVAK.[T]	1xCarbamidomethyl [C2]; 1xPhospho [S13]; 1xTMT6plex [K16]; 1xTMT6plex [N-Term]	P46734 1xPhospho [S218]	0.0046922	0.000108793	1	2	1	P46734	P46734 [206-221]	0	2300.11	0							No Quan Values	Not Found	Not Found	Not Found	Not Found	Not Found	Not Found	High	Not Found	Not Found	Not Found	Not Found	High	3.165e-05	0.0002684	3.13
FALSE	High	[K].AIGAVPLIQGEYMIPCEK.[V]	1xCarbamidomethyl [C16]; 1xTMT6plex [K18]; 1xTMT6plex [N-Term]		6.94255e-05	0	1	1	1	P07339	P07339 [314-331]	0	2447.34	0							No Quan Values	Not Found	Not Found	Not Found	Not Found	Not Found	Not Found	Not Found	Not Found	Not Found	High	Not Found	High	0	6.563e-06	3.62
FALSE	High	[K].AQEACGPLEMDSALSVVQNLEK.[D]	1xCarbamidomethyl [C5]; 1xTMT6plex [K22]; 1xTMT6plex [N-Term]		6.58899e-10	0	1	1	1	Q9Y490	Q9Y490 [1041-1062]	0	2847.46	0							No Quan Values	Not Found	Not Found	Not Found	Not Found	Not Found	Not Found	Not Found	Not Found	Not Found	High	Not Found	High	0	1.463e-10	5.52
FALSE	High	[K].ALGALVDNCAPGLCPDWEAWDPNQPVENAR.[E]	2xCarbamidomethyl [C9; C14]; 1xTMT6plex [N-Term]		4.58824e-08	0	1	1	1	Q14315	Q14315 [190-219]	0	3564.68	0							No Quan Values	Not Found	Not Found	Not Found	Not Found	Not Found	Not Found	Not Found	Not Found	Not Found	High	Not Found	High	0	7.443e-09	4.67
FALSE	High	[R].IVSAQSLAEDDVE.[-]	1xPhospho [S6]; 1xTMT6plex [N-Term]	Q15388 1xPhospho [S138]	0.0580388	0.00130733	1	1	1	Q15388	Q15388 [133-145]	0	1684.79	0							No Quan Values	Not Found	Not Found	Not Found	Not Found	Not Found	Not Found	Not Found	Not Found	Not Found	Not Found	High	High	0.0004359	0.006956	2.72
FALSE	High	[R].YLTESYGTGQDIDDR.[I]	1xTMT6plex [N-Term]		7.17879e-05	0	1	1	1	Q9UM54	Q9UM54 [167-181]	0	1961.93	0							No Quan Values	Not Found	Not Found	Not Found	Not Found	Not Found	Not Found	Not Found	Not Found	Not Found	High	Not Found	High	0	6.751e-06	3.92
FALSE	High	[R].AIFLADGNVFTTGFSR.[M]	1xTMT6plex [N-Term]		3.13068e-05	0	1	1	1	Q9ULV4	Q9ULV4 [224-239]	0	1945.04	0							No Quan Values	High	Not Found	Not Found	Not Found	Not Found	Not Found	Not Found	Not Found	Not Found	Not Found	Not Found	High	0	3.153e-06	2.3
FALSE	High	[R].NDSPTQIPVSSDVCR.[L]	1xCarbamidomethyl [C14]; 1xPhospho [S3]; 1xTMT6plex [N-Term]	Q8TC07 1xPhospho [S675]	0.0898755	0.0025315	1	1	1	Q8TC07	Q8TC07 [673-687]	0	1983.9	0							No Quan Values	Not Found	Not Found	Not Found	Not Found	Not Found	Not Found	Not Found	Not Found	Not Found	Not Found	High	High	0.0009331	0.01411	2.61
FALSE	High	[K].AEEILEK.[G]	1xTMT6plex [K7]; 1xTMT6plex [N-Term]		0.156551	0.00540433	1	1	1	P62913	P62913 [79-85]	0	1289.77	0							No Quan Values	Not Found	Not Found	Not Found	Not Found	Not Found	Not Found	Not Found	Not Found	Not Found	High	Not Found	High	0.002049	0.03423	2.11
FALSE	High	[K].LPPPPGSPLGHSPTASPPPTAR.[K]	1xPhospho [S]; 1xTMT6plex [N-Term]	O95785 1xPhospho [S]	0.105628	0.00303607	1	1	2	O95785	O95785 [1140-1161]	0	2440.26	0							No Quan Values	Not Found	Not Found	Not Found	Not Found	Not Found	Not Found	High	Not Found	Not Found	Not Found	Not Found	High	0.001264	0.02201	1.79
FALSE	High	[R].ALEQQVEEMK.[T]	1xTMT6plex [K10]; 1xTMT6plex [N-Term]		0.00121658	0.000108793	1	1	1	P35579	P35579 [1529-1538]	0	1662.91	0							No Quan Values	Not Found	Not Found	Not Found	Not Found	Not Found	Not Found	Not Found	Not Found	Not Found	High	Not Found	High	3.165e-05	8.272e-05	3.11
FALSE	High	[R].VLYPNDNFFEGK.[E]	1xTMT6plex [K12]; 1xTMT6plex [N-Term]		0.00650711	0.000108793	1	3	1	P11216	P11216 [279-290]	0	1901.02	0							No Quan Values	Not Found	Not Found	Not Found	Not Found	Not Found	Not Found	Not Found	Not Found	Not Found	High	Not Found	High	3.165e-05	0.0003738	3.26
FALSE	High	[K].LVSIGAEEIVDGNAK.[M]	1xTMT6plex [K15]; 1xTMT6plex [N-Term]		0.00031502	0	1	1	1	O43707	O43707 [126-140]	0	1973.13	0							No Quan Values	Not Found	Not Found	Not Found	Not Found	Not Found	Not Found	Not Found	Not Found	Not Found	High	Not Found	High	0	2.593e-05	3.13
FALSE	High	[R].VSSPSPELGTTPASIFR.[T]	1xPhospho [S5]; 1xTMT6plex [N-Term]	Q99501 1xPhospho [S492]	0.0576675	0.00130733	1	1	1	Q99501	Q99501 [488-504]	0	2055.04	0							No Quan Values	Not Found	Not Found	Not Found	Not Found	Not Found	High	Not Found	Not Found	Not Found	Not Found	Not Found	High	0.0004359	0.006846	2.46
FALSE	High	[R].AQAEAQQPTFDALR.[D]	1xTMT6plex [N-Term]		0.0264023	0.000295797	1	1	1	Q15149	Q15149 [1274-1287]	0	1774.93	0							No Quan Values	Not Found	Not Found	Not Found	Not Found	Not Found	Not Found	Not Found	Not Found	Not Found	High	Not Found	High	0.0001658	0.002055	2.77
FALSE	High	[K].NNNIDAAIENIENMLTSENK.[V]	1xOxidation [M14]; 1xTMT6plex [K20]; 1xTMT6plex [N-Term]		1.3565e-06	0	1	1	1	P42704	P42704 [1190-1209]	0	2721.38	0							No Quan Values	Not Found	Not Found	Not Found	Not Found	Not Found	Not Found	Not Found	Not Found	Not Found	High	Not Found	High	0	1.718e-07	4.9
FALSE	High	[R].WVVIGDENYGEGSSR.[E]	1xTMT6plex [N-Term]		1.86994e-05	0	1	1	1	Q99798	Q99798 [657-671]	0	1896.93	0							No Quan Values	Not Found	Not Found	Not Found	Not Found	Not Found	Not Found	Not Found	Not Found	Not Found	High	Not Found	High	0	1.955e-06	4.01
FALSE	High	[R].MPQPSSGRESPRH.[-]	1xPhospho [S10]; 1xTMT6plex [N-Term]	P56181 1xPhospho [S105]	0.103689	0.00287063	1	1	1	P56181	P56181 [96-108]	2	1774.83	0							No Quan Values	Not Found	Not Found	Not Found	Not Found	High	Not Found	Not Found	Not Found	Not Found	Not Found	Not Found	High	0.001042	0.01768	2.9
FALSE	High	[R].NKSESQCDEDGMTSSLSESLK.[T]	1xCarbamidomethyl [C7]; 1xPhospho [T13]; 2xTMT6plex [K2; K21]; 1xTMT6plex [N-Term]	Q92574 1xPhospho [T1110]	0.0364056	0.000484649	1	1	1	Q92574	Q92574 [1098-1118]	1	3099.45	0							No Quan Values	Not Found	Not Found	Not Found	Not Found	High	Not Found	Not Found	Not Found	Not Found	Not Found	Not Found	High	0.000216	0.003288	2.81
FALSE	High	[R].LQGVGALGQAASDNSGPEDAK.[R]	1xTMT6plex [K21]; 1xTMT6plex [N-Term]		3.39588e-09	0	1	2	1	Q5JPE7	Q5JPE7 [1191-1211]	0	2443.28	0							No Quan Values	Not Found	Not Found	Not Found	Not Found	Not Found	Not Found	Not Found	Not Found	Not Found	High	Not Found	High	0	6.667e-10	5.75
FALSE	High	[K].VSSSSPQSGCPSPTIPAGK.[V]	1xCarbamidomethyl [C10]; 1xPhospho [T/S]; 1xTMT6plex [K19]; 1xTMT6plex [N-Term]	Q76L83 1xPhospho [S/T]	0.00475527	0.000108793	1	1	2	Q76L83	Q76L83 [135-153]	0	2382.18	0							No Quan Values	Not Found	Not Found	Not Found	Not Found	Not Found	High	Not Found	Not Found	Not Found	Not Found	Not Found	High	3.165e-05	0.0002706	2.57
FALSE	High	[R].AISTGSLASSTLNK.[L]	1xPhospho [S/T]; 1xTMT6plex [K14]; 1xTMT6plex [N-Term]	Q12923 1xPhospho [T/S]	0.000943601	0	1	1	2	Q12923	Q12923 [906-919]	0	1888.02	0							No Quan Values	Not Found	Not Found	Not Found	Not Found	Not Found	Not Found	High	Not Found	Not Found	Not Found	Not Found	High	0	6.696e-05	3.89
FALSE	High	[R].YSSQDADEQDWEFQK.[R]	1xTMT6plex [K15]; 1xTMT6plex [N-Term]		5.27803e-06	0	1	1	1	Q9C0C2	Q9C0C2 [918-932]	0	2334.09	0							No Quan Values	Not Found	Not Found	Not Found	Not Found	Not Found	Not Found	Not Found	Not Found	Not Found	High	Not Found	High	0	6.065e-07	4.05
FALSE	High	[R].AEWADIDPVPQNDGPNPVVQIIYSDK.[F]	1xTMT6plex [K26]; 1xTMT6plex [N-Term]		0.000496504	0	1	1	1	P49354	P49354 [70-95]	0	3338.73	0							No Quan Values	Not Found	Not Found	Not Found	Not Found	Not Found	Not Found	Not Found	Not Found	Not Found	High	Not Found	High	0	3.878e-05	3.54
FALSE	High	[K].AALSEEELEK.[K]	1xPhospho [S4]; 1xTMT6plex [K10]; 1xTMT6plex [N-Term]	Q04637 1xPhospho [S1238]	0.00168815	0.000108793	1	1	1	Q04637	Q04637 [1235-1244]	0	1656.85	0							No Quan Values	Not Found	Not Found	Not Found	Not Found	Not Found	Not Found	Not Found	Not Found	Not Found	Not Found	High	High	3.165e-05	0.0001074	3.09
FALSE	High	[K].NADGFIDLEEYIGDMYSHDGNTDEPEWVK.[T]	1xOxidation [M15]; 1xTMT6plex [K29]; 1xTMT6plex [N-Term]		4.70912e-05	0	1	1	1	O43852	O43852 [203-231]	0	3833.75	0							No Quan Values	Not Found	Not Found	Not Found	Not Found	Not Found	Not Found	Not Found	Not Found	Not Found	High	Not Found	High	0	4.571e-06	4.16
FALSE	High	[K].AAGMSSPGAQSHPEELPR.[G]	1xPhospho [S5]; 1xOxidation [M4]; 1xTMT6plex [N-Term]	Q13459 1xPhospho [S716]	0.0599295	0.00130733	1	1	1	Q13459	Q13459 [712-729]	0	2146.98	0							No Quan Values	Not Found	Not Found	High	Not Found	Not Found	Not Found	Not Found	Not Found	Not Found	Not Found	Not Found	High	0.0004359	0.007304	1.94
FALSE	High	[R].LQEELAASDR.[A]	1xTMT6plex [N-Term]		0.202156	0.00852602	1	1	1	Q7Z406	Q7Z406 [1709-1718]	0	1360.73	0							No Quan Values	Not Found	Not Found	Not Found	Not Found	Not Found	Not Found	Not Found	Not Found	Not Found	High	Not Found	High	0.003368	0.04953	2.4
FALSE	High	[R].VVLASASPR.[R]	1xPhospho [S7]; 1xTMT6plex [N-Term]	O95671 1xPhospho [S21]	0.015252	0.000295797	1	1	1	O95671	O95671 [15-23]	0	1208.66	0							No Quan Values	Not Found	Not Found	Not Found	Not Found	Not Found	High	Not Found	Not Found	Not Found	Not Found	Not Found	High	0.000144	0.0009918	2.73
FALSE	High	[K].IQAGEGETAVLNQLQEK.[N]	1xTMT6plex [K17]; 1xTMT6plex [N-Term]		3.53242e-06	0	1	1	1	Q15075	Q15075 [553-569]	0	2286.27	0							No Quan Values	Not Found	Not Found	Not Found	Not Found	Not Found	Not Found	Not Found	Not Found	Not Found	High	Not Found	High	0	4.169e-07	4.16
FALSE	High	[R].LYKDDQLLDDGK.[T]	2xTMT6plex [K3; K12]; 1xTMT6plex [N-Term]		2.66747e-07	0	1	1	1	Q15370	Q15370 [44-55]	1	2110.2	0							No Quan Values	Not Found	Not Found	Not Found	Not Found	Not Found	Not Found	Not Found	Not Found	Not Found	High	Not Found	High	0	3.801e-08	4.72
FALSE	High	[K].LTASEQAHPQEPAESAHEPRLSAEYEK.[V]	1xPhospho [Y/S]; 1xTMT6plex [K27]; 1xTMT6plex [N-Term]	Q02952 1xPhospho [S/Y]	0.000231559	0	1	1	2	Q02952	Q02952 [350-376]	1	3543.72	0							No Quan Values	Not Found	Not Found	Not Found	Not Found	High	Not Found	Not Found	Not Found	Not Found	Not Found	Not Found	High	0	1.964e-05	5.29
FALSE	High	[R].AKSLSAMDVEK.[C]	1xPhospho [S3]; 2xTMT6plex [K2; K11]; 1xTMT6plex [N-Term]	Q6ZV73 1xPhospho [S605]	0.0876546	0.0025315	1	1	1	Q6ZV73	Q6ZV73 [603-613]	1	1946.06	0							No Quan Values	Not Found	Not Found	Not Found	Not Found	Not Found	Not Found	High	Not Found	Not Found	Not Found	Not Found	High	0.0009113	0.01355	2.77
FALSE	High	[K].AATEALGEKSPDSATVSGYDIMK.[S]	1xPhospho [S/T/Y]; 1xOxidation [M22]; 2xTMT6plex [K9; K23]; 1xTMT6plex [N-Term]	Q6WCQ1 1xPhospho [S/T/Y]	1.10206e-05	0	1	1	6	Q6WCQ1	Q6WCQ1 [968-990]	1	3124.57	0							No Quan Values	Not Found	Not Found	Not Found	Not Found	High	High	Not Found	Not Found	Not Found	Not Found	Not Found	High	0	1.194e-06	4.69
FALSE	High	[K].ANCSDNEFTQALTAAIPPESLTR.[G]	1xCarbamidomethyl [C3]; 1xTMT6plex [N-Term]		0.00376421	0.000108793	1	1	1	Q16891	Q16891 [601-623]	0	2735.35	0							No Quan Values	Not Found	Not Found	Not Found	Not Found	Not Found	Not Found	Not Found	Not Found	Not Found	High	Not Found	High	3.165e-05	0.0002157	3.21
FALSE	High	[R].NASASFQELEDK.[K]	2xPhospho [S3; S5]; 1xTMT6plex [K12]; 1xTMT6plex [N-Term]	Q99543 2xPhospho [S47; S49]	0.166058	0.00598264	1	1	1	Q99543	Q99543 [45-56]	0	1956.88	0							No Quan Values	Not Found	Not Found	Not Found	Not Found	Not Found	Not Found	Not Found	Not Found	Not Found	Not Found	High	High	0.00236	0.03732	2.14
FALSE	High	[KR].VTIAQGGVLPNIQAVLLPK.[K]	1xTMT6plex [K19]; 1xTMT6plex [N-Term]		1.59246e-05	0	1	10	2	P04908	P04908 [101-119]	0	2389.49	0							No Quan Values	High	High	Not Found	Not Found	Not Found	Not Found	Not Found	Not Found	Not Found	Not Found	Not Found	High	0	1.685e-06	3.16
FALSE	High	[K].VTLLDGTEYSCDLEK.[H]	1xCarbamidomethyl [C11]; 1xTMT6plex [K15]; 1xTMT6plex [N-Term]		1.0874e-05	0	1	1	1	O43491	O43491 [222-236]	0	2201.14	0							No Quan Values	Not Found	Not Found	Not Found	Not Found	Not Found	Not Found	Not Found	Not Found	Not Found	High	Not Found	High	0	1.186e-06	3.9
FALSE	High	[K].LPSSSGLPAADVSPATAEEPLSPSTPTR.[R]	1xPhospho [S22]; 1xTMT6plex [N-Term]	O43149 1xPhospho [S1518]	3.02844e-06	0	1	1	1	O43149	O43149 [1497-1524]	0	3044.5	0							No Quan Values	Not Found	Not Found	Not Found	Not Found	High	Not Found	Not Found	Not Found	Not Found	Not Found	Not Found	High	0	3.614e-07	5.47
FALSE	High	[K].ITDEEELNDYK.[L]	1xTMT6plex [K11]; 1xTMT6plex [N-Term]		0.00011091	0	1	1	1	Q9BZJ0	Q9BZJ0 [214-224]	0	1826.94	0							No Quan Values	Not Found	Not Found	Not Found	Not Found	Not Found	Not Found	Not Found	Not Found	Not Found	High	Not Found	High	0	1.009e-05	3.48
FALSE	High	[R].LTGEEVNSCVEVLLEEAK.[D]	1xCarbamidomethyl [C9]; 1xTMT6plex [K18]; 1xTMT6plex [N-Term]		4.43505e-06	0	1	1	1	P49589	P49589 [174-191]	0	2477.32	0							No Quan Values	Not Found	Not Found	Not Found	Not Found	Not Found	Not Found	Not Found	Not Found	Not Found	High	Not Found	High	0	5.141e-07	4.62
FALSE	High	[R].AATAARPPAPPPAPQPPSPTPSPPRPTLAR.[E]	1xPhospho [S18]; 1xTMT6plex [N-Term]	Q96B36 1xPhospho [S88]	0.133214	0.0044861	1	1	1	Q96B36	Q96B36 [71-100]	0	3273.75	0							No Quan Values	Not Found	Not Found	Not Found	Not Found	Not Found	Not Found	High	Not Found	Not Found	Not Found	Not Found	High	0.001675	0.02681	3.37
FALSE	High	[K].YQLDKDGVVLFK.[K]	2xTMT6plex [K5; K12]; 1xTMT6plex [N-Term]		0.176057	0.00689042	1	1	1	P07237	P07237 [196-207]	1	2112.27	0							No Quan Values	High	Not Found	Not Found	Not Found	Not Found	Not Found	Not Found	Not Found	Not Found	Not Found	Not Found	High	0.002712	0.04079	2.28
FALSE	High	[K].IPVTDEEQTNVPYIYAIGDILEDK.[V]	1xTMT6plex [K24]; 1xTMT6plex [N-Term]		1.03122e-07	0	1	1	1	Q16881	Q16881 [466-489]	0	3193.69	0							No Quan Values	Not Found	Not Found	Not Found	Not Found	Not Found	Not Found	Not Found	Not Found	Not Found	High	Not Found	High	0	1.58e-08	5.03
FALSE	High	[R].ITEFCHR.[F]	1xCarbamidomethyl [C5]; 1xTMT6plex [N-Term]		0.0177641	0.000295797	1	1	1	P07237	P07237 [339-345]	0	1191.61	0							No Quan Values	Not Found	Not Found	Not Found	Not Found	Not Found	Not Found	High	Not Found	Not Found	Not Found	Not Found	High	0.000144	0.001196	1.69
FALSE	High	[R].AELDEVNK.[S]	1xTMT6plex [K8]; 1xTMT6plex [N-Term]		0.201008	0.00852602	1	1	1	Q03252	Q03252 [126-133]	0	1375.78	0							No Quan Values	Not Found	Not Found	Not Found	Not Found	Not Found	Not Found	Not Found	Not Found	Not Found	High	Not Found	High	0.003332	0.04913	2.29
FALSE	High	[K].YEDKPEPEVDALGSPPALLK.[S]	1xPhospho [S14]; 2xTMT6plex [K4; K20]; 1xTMT6plex [N-Term]	Q68DQ2 1xPhospho [S931]	0.000133767	0	1	1	1	Q68DQ2	Q68DQ2 [918-937]	0	2935.57	0							No Quan Values	Not Found	Not Found	Not Found	Not Found	Not Found	High	Not Found	Not Found	Not Found	Not Found	Not Found	High	0	1.197e-05	4.22
FALSE	High	[R].IMNVIGEPIDER.[G]	1xTMT6plex [N-Term]		0.000594792	0	1	1	1	P06576	P06576 [144-155]	0	1614.87	0							No Quan Values	Not Found	Not Found	Not Found	Not Found	Not Found	Not Found	Not Found	Not Found	Not Found	High	Not Found	High	0	4.553e-05	2.5
FALSE	High	[R].YEGSYALTSEEAER.[S]	1xTMT6plex [N-Term]		0.0744191	0.00192952	1	1	1	O95810	O95810 [395-408]	0	1833.87	0							No Quan Values	Not Found	Not Found	Not Found	Not Found	Not Found	Not Found	Not Found	Not Found	Not Found	High	Not Found	High	0.0007236	0.01034	2.64
FALSE	High	[K].LMTIMDSMNDQELDSTDGAK.[V]	1xTMT6plex [K20]; 1xTMT6plex [N-Term]		3.1129e-09	0	1	1	1	P61011	P61011 [375-394]	0	2673.28	0							No Quan Values	Not Found	Not Found	Not Found	Not Found	Not Found	Not Found	Not Found	Not Found	Not Found	High	Not Found	High	0	6.148e-10	5.98
FALSE	High	[R].LNCEDIDECR.[T]	2xCarbamidomethyl [C3; C9]; 1xTMT6plex [N-Term]		0.000975685	0	1	1	1	Q12805	Q12805 [290-299]	0	1552.69	0							No Quan Values	Not Found	Not Found	Not Found	Not Found	Not Found	Not Found	Not Found	Not Found	Not Found	High	Not Found	High	0	6.9e-05	3.01
FALSE	High	[K].IMVDMLDSDGSGK.[L]	1xTMT6plex [K13]; 1xTMT6plex [N-Term]		0.0040242	0.000108793	1	1	1	P17655	P17655 [579-591]	0	1825.94	0							No Quan Values	Not Found	Not Found	Not Found	Not Found	Not Found	Not Found	Not Found	Not Found	Not Found	High	Not Found	High	3.165e-05	0.0002307	2.15
FALSE	High	[R].VPSYDSFDSEDYPAALPNHKPK.[G]	1xPhospho [S3]; 2xTMT6plex [K20; K22]; 1xTMT6plex [N-Term]	P14921 1xPhospho [S282]	2.52712e-05	0	1	1	1	P14921	P14921 [280-301]	0	3244.62	0							No Quan Values	Not Found	Not Found	Not Found	Not Found	Not Found	Not Found	High	Not Found	Not Found	Not Found	Not Found	High	0	2.573e-06	5.42
FALSE	High	[K].AELASPLNEADGHR.[G]	1xPhospho [S5]; 1xTMT6plex [N-Term]	Q9BXC9 1xPhospho [S365]	0.0119292	0.000209539	1	1	1	Q9BXC9	Q9BXC9 [361-374]	0	1788.85	0							No Quan Values	Not Found	Not Found	Not Found	Not Found	Not Found	Not Found	Not Found	Not Found	Not Found	Not Found	High	High	0.0001195	0.0007404	1.67
FALSE	High	[K].IYQEEEMPESGAGSEFNR.[K]	1xOxidation [M7]; 1xTMT6plex [N-Term]		0.00025092	0	1	1	1	P35269	P35269 [56-73]	0	2318.04	0							No Quan Values	Not Found	Not Found	Not Found	Not Found	Not Found	Not Found	Not Found	Not Found	Not Found	High	Not Found	High	0	2.122e-05	3.55
FALSE	High	[R].VQEHEDSGDSEVENEAK.[G]	1xPhospho [S7]; 1xTMT6plex [K17]; 1xTMT6plex [N-Term]	Q9Y5J1 1xPhospho [S121]	1.3292e-05	0	1	1	1	Q9Y5J1	Q9Y5J1 [115-131]	0	2440.09	0							No Quan Values	High	Not Found	Not Found	Not Found	Not Found	Not Found	Not Found	Not Found	Not Found	Not Found	Not Found	High	0	1.421e-06	3.82
FALSE	High	[K].ISMPDIDLNLK.[G]	1xPhospho [S2]; 1xOxidation [M3]; 1xTMT6plex [K11]; 1xTMT6plex [N-Term]	Q09666 1xPhospho [S2708]; 1xPhospho [S5798]; 1xPhospho [S9016]; 1xPhospho [S12558]; 1xPhospho [S16302]; 1xPhospho [S20174]; 1xPhospho [S24894]	0.00914153	0.000209539	1	1	2	Q09666	Q09666 [2707-2717]; [3091-3101]; [3219-3229]; [3543-3553]; [3745-3755]; [3873-3883]; [4721-4731]	0	1812.96	0							No Quan Values	Not Found	Not Found	Not Found	Not Found	Not Found	High	Not Found	Not Found	Not Found	Not Found	Not Found	High	6.142e-05	0.000546	3.83
FALSE	High	[R].YSIPDLAVDVEQVIGLEK.[V]	1xPhospho [Y/S]; 1xTMT6plex [K18]; 1xTMT6plex [N-Term]	Q9Y4G8 1xPhospho [S/Y]	1.27688e-05	0	1	1	2	Q9Y4G8	Q9Y4G8 [500-517]	0	2526.35	0							No Quan Values	Not Found	Not Found	Not Found	Not Found	Not Found	High	Not Found	Not Found	Not Found	Not Found	Not Found	High	0	1.373e-06	3.92
FALSE	High	[R].AASDGQYENQSPEATSPRSPGVR.[S]	2xPhospho [S19; T/S]; 1xTMT6plex [N-Term]	Q9HBL0 2xPhospho [S915; S/T]	9.4506e-07	0	1	1	2	Q9HBL0	Q9HBL0 [897-919]	1	2793.21	0							No Quan Values	Not Found	Not Found	Not Found	Not Found	Not Found	Not Found	Not Found	Not Found	Not Found	Not Found	High	High	0	1.234e-07	4.53
FALSE	High	[R].AAYISALPTSPHWGR.[G]	1xPhospho [S10]; 1xTMT6plex [N-Term]	Q9P2H5 1xPhospho [S982]	5.67967e-05	0	1	1	1	Q9P2H5	Q9P2H5 [973-987]	0	1935.97	0							No Quan Values	Not Found	Not Found	Not Found	Not Found	Not Found	Not Found	Not Found	High	Not Found	Not Found	Not Found	High	0	5.463e-06	3.33
FALSE	High	[R].AHSPAEGASVESSSPGPK.[K]	2xPhospho [S3; S9]; 1xTMT6plex [K18]; 1xTMT6plex [N-Term]	Q8NFG4 2xPhospho [S62; S68]	0.000208048	0	1	1	1	Q8NFG4	Q8NFG4 [60-77]	0	2313.06	0							No Quan Values	Not Found	Not Found	Not Found	Not Found	Not Found	Not Found	Not Found	Not Found	Not Found	Not Found	High	High	0	1.791e-05	4.4
FALSE	High	[K].NADNNSSAFTALSEER.[D]	1xTMT6plex [N-Term]		0.000842198	0	1	1	1	Q14789	Q14789 [731-746]	0	1954.93	0							No Quan Values	Not Found	Not Found	Not Found	Not Found	Not Found	Not Found	Not Found	Not Found	Not Found	High	Not Found	High	0	6.094e-05	2.69
FALSE	High	[K].NDECVLEDNSQR.[T]	1xCarbamidomethyl [C4]; 1xTMT6plex [N-Term]		0.00262417	0.000108793	1	1	1	Q9UPN3	Q9UPN3 [889-900]	0	1707.78	0							No Quan Values	Not Found	Not Found	Not Found	Not Found	Not Found	Not Found	Not Found	Not Found	Not Found	High	Not Found	High	3.165e-05	0.0001554	2.93
FALSE	High	[R].VSVVANTPSGPVEAFDFDEYQPEMLEK.[F]	1xTMT6plex [K27]; 1xTMT6plex [N-Term]		2.41209e-06	0	1	1	1	P12111	P12111 [1887-1913]	0	3456.73	0							No Quan Values	Not Found	Not Found	Not Found	Not Found	Not Found	Not Found	Not Found	Not Found	Not Found	High	Not Found	High	0	2.924e-07	4.36
FALSE	High	[K].AKADSPVNGLPK.[G]	1xPhospho [S5]; 2xTMT6plex [K2; K12]; 1xTMT6plex [N-Term]	Q96S94 1xPhospho [S369]	0.00260669	0.000108793	1	1	1	Q96S94	Q96S94 [365-376]	1	1964.12	0							No Quan Values	Not Found	Not Found	Not Found	Not Found	Not Found	Not Found	High	Not Found	Not Found	Not Found	Not Found	High	3.165e-05	0.0001554	2.9
FALSE	High	[R].YESLTDPSK.[L]	1xTMT6plex [K9]; 1xTMT6plex [N-Term]		0.0135344	0.000209539	2	5	1	P07900; P08238	P07900 [61-69]; P08238 [56-64]	0	1497.82	0							No Quan Values	Not Found	Not Found	Not Found	Not Found	Not Found	Not Found	Not Found	Not Found	Not Found	High	Not Found	High	0.0001195	0.0008601	2.77
FALSE	High	[K].NLGLEELGIELDPR.[G]	1xTMT6plex [N-Term]		0.000123445	0	1	1	1	P09622	P09622 [321-334]	0	1797	0							No Quan Values	Not Found	Not Found	Not Found	Not Found	Not Found	Not Found	Not Found	Not Found	Not Found	High	Not Found	High	0	1.11e-05	3.49
FALSE	High	[R].IITIPPFLAYGEDGDGK.[D]	1xTMT6plex [K17]; 1xTMT6plex [N-Term]		0.00152708	0.000108793	1	1	1	O95302	O95302 [220-236]	0	2264.26	0							No Quan Values	Not Found	Not Found	Not Found	Not Found	Not Found	Not Found	Not Found	Not Found	Not Found	High	Not Found	High	3.165e-05	9.938e-05	3.45
FALSE	High	[K].VQGLEQAVDNFEGK.[K]	1xTMT6plex [K14]; 1xTMT6plex [N-Term]		6.23756e-05	0	1	1	1	O95817	O95817 [432-445]	0	1992.08	0							No Quan Values	Not Found	Not Found	Not Found	Not Found	Not Found	Not Found	Not Found	Not Found	Not Found	High	Not Found	High	0	5.921e-06	4.41
FALSE	High	[K].AMLSEQNRASPLPSGLLTPPQSGK.[K]	1xPhospho [S10]; 1xTMT6plex [K24]; 1xTMT6plex [N-Term]	P24864 1xPhospho [S387]	0.049408	0.000948301	1	1	1	P24864	P24864 [378-401]	1	3017.59	0							No Quan Values	Not Found	Not Found	Not Found	Not Found	Not Found	Not Found	Not Found	High	Not Found	Not Found	Not Found	High	0.0003407	0.005358	3.33
FALSE	High	[R].LQDDSVETVTSIEQAK.[V]	1xTMT6plex [K16]; 1xTMT6plex [N-Term]		0.000145926	0	1	1	1	P49356	P49356 [35-50]	0	2221.2	0							No Quan Values	Not Found	Not Found	Not Found	Not Found	Not Found	Not Found	Not Found	Not Found	Not Found	High	Not Found	High	0	1.294e-05	3.5
FALSE	High	[K].AAVLSDSEDEEKASAK.[K]	1xPhospho [S]; 2xTMT6plex [K12; K16]; 1xTMT6plex [N-Term]	Q96ST2 1xPhospho [S]	0.00250424	0.000108793	1	1	2	Q96ST2	Q96ST2 [394-409]	1	2417.24	0							No Quan Values	Not Found	Not Found	Not Found	Not Found	High	Not Found	Not Found	Not Found	Not Found	Not Found	Not Found	High	3.165e-05	0.0001499	3.02
FALSE	High	[K].LLVDVDESTLSPEEQK.[E]	1xTMT6plex [K16]; 1xTMT6plex [N-Term]		3.50792e-05	0	1	1	1	O75533	O75533 [478-493]	0	2260.23	0							No Quan Values	Not Found	Not Found	Not Found	Not Found	Not Found	Not Found	Not Found	Not Found	Not Found	High	Not Found	High	0	3.488e-06	4.04
FALSE	High	[R].AAVGQESPGGLEAGNAK.[A]	1xPhospho [S7]; 1xTMT6plex [K17]; 1xTMT6plex [N-Term]	Q29RF7 1xPhospho [S1305]	2.49352e-05	0	1	1	1	Q29RF7	Q29RF7 [1299-1315]	0	2094.06	0							No Quan Values	Not Found	Not Found	Not Found	High	Not Found	Not Found	Not Found	Not Found	Not Found	Not Found	Not Found	High	0	2.549e-06	3.89
FALSE	High	[K].ITAFVPNDGCLNFIEENDEVLVAGFGR.[K]	1xCarbamidomethyl [C10]; 1xTMT6plex [N-Term]		6.75916e-05	0	1	1	1	P62266	P62266 [81-107]	0	3225.61	0							No Quan Values	Not Found	Not Found	Not Found	Not Found	Not Found	Not Found	Not Found	Not Found	Not Found	High	Not Found	High	0	6.378e-06	3.45
FALSE	High	[R].VPLSPLSLLAGPADAR.[R]	1xPhospho [S4]; 1xTMT6plex [N-Term]	Q53ET0 1xPhospho [S433]	0.0663801	0.00175403	1	1	1	Q53ET0	Q53ET0 [430-445]	0	1886.03	0							No Quan Values	Not Found	Not Found	Not Found	Not Found	Not Found	Not Found	Not Found	High	Not Found	Not Found	Not Found	High	0.0005796	0.00865	2.53
FALSE	High	[R].LYGGALLSISLIMWNALYTAEK.[V]	3xPhospho [Y2; S10; T19]; 1xTMT6plex [K22]; 1xTMT6plex [N-Term]	O14683 3xPhospho [Y106; S114; T123]	0.213943	0.00984916	1	1	1	O14683	O14683 [105-126]	0	3125.52	0							No Quan Values	Not Found	Not Found	Not Found	Not Found	High	Not Found	Not Found	Not Found	Not Found	Not Found	Not Found	High	0.003827	0.05349	3.91
FALSE	High	[K].YDTNNNEEEEGEQFDFDSGDEIPEADR.[Q]	1xPhospho [S18]; 1xTMT6plex [N-Term]	O15013 1xPhospho [S59]	4.04134e-09	0	1	1	1	O15013	O15013 [42-68]	0	3473.37	0							No Quan Values	Not Found	Not Found	Not Found	Not Found	Not Found	Not Found	Not Found	Not Found	Not Found	Not Found	High	High	0	7.842e-10	5.56
FALSE	High	[K].VTSYEVQLFDENNQK.[I]	1xTMT6plex [K15]; 1xTMT6plex [N-Term]		0.20447	0.00868388	1	1	1	P23467	P23467 [139-153]	0	2272.19	0							No Quan Values	Not Found	Not Found	Not Found	Not Found	Not Found	Not Found	Not Found	Not Found	Not Found	High	Not Found	High	0.003368	0.05004	1.88
FALSE	High	[R].AELVCLNNTEISENSSDLSQK.[L]	1xCarbamidomethyl [C5]; 1xTMT6plex [K21]; 1xTMT6plex [N-Term]		4.58824e-08	0	1	1	1	Q9P0K7	Q9P0K7 [464-484]	0	2809.43	0							No Quan Values	Not Found	Not Found	Not Found	Not Found	Not Found	Not Found	Not Found	Not Found	Not Found	High	Not Found	High	0	7.466e-09	4.64
FALSE	High	[K].LMDLDVEQLGIPEQEYSCVVK.[M]	1xCarbamidomethyl [C18]; 1xOxidation [M2]; 1xTMT6plex [K21]; 1xTMT6plex [N-Term]		0.00010726	0	1	1	1	P12004	P12004 [118-138]	0	2939.51	0							No Quan Values	Not Found	Not Found	Not Found	Not Found	Not Found	Not Found	Not Found	Not Found	Not Found	High	Not Found	High	0	9.762e-06	3.51
FALSE	High	[R].VTSTNPLTPTPPPPVAK.[T]	1xPhospho [T10]; 1xTMT6plex [K17]; 1xTMT6plex [N-Term]	O43150 1xPhospho [T845]	5.95524e-07	0	1	1	1	O43150	O43150 [836-852]	0	2255.25	0							No Quan Values	Not Found	Not Found	Not Found	Not Found	Not Found	Not Found	High	Not Found	Not Found	Not Found	Not Found	High	0	8.013e-08	4.85
FALSE	High	[R].VNVALVYPPTPTVISPCSK.[K]	1xCarbamidomethyl [C17]; 1xPhospho [S15]; 1xTMT6plex [K19]; 1xTMT6plex [N-Term]	Q9Y4C4 1xPhospho [S1038]	8.60056e-05	0	1	1	1	Q9Y4C4	Q9Y4C4 [1024-1042]	0	2580.39	0							No Quan Values	Not Found	Not Found	Not Found	Not Found	Not Found	Not Found	Not Found	High	Not Found	Not Found	Not Found	High	0	7.964e-06	3.63
FALSE	High	[K].ISSIQSIVPALEIANAHR.[K]	1xTMT6plex [N-Term]		1.45039e-06	0	1	1	1	P10809	P10809 [251-268]	0	2148.23	0							No Quan Values	High	Not Found	Not Found	Not Found	Not Found	Not Found	Not Found	Not Found	Not Found	Not Found	Not Found	High	0	1.834e-07	3.98
FALSE	High	[K].LSEGSQPAEEEEDQETPSR.[N]	1xPhospho [S2]; 1xTMT6plex [N-Term]	Q9UKV3 1xPhospho [S240]	0.000736754	0	1	1	1	Q9UKV3	Q9UKV3 [239-257]	0	2427.04	0							No Quan Values	High	Not Found	Not Found	Not Found	Not Found	Not Found	Not Found	Not Found	Not Found	Not Found	Not Found	High	0	5.468e-05	2.53
FALSE	High	[K].VPVLISPTLK.[H]	1xPhospho [S6]; 1xTMT6plex [K10]; 1xTMT6plex [N-Term]	P42684 1xPhospho [S936]	0.00536235	0.000108793	1	1	1	P42684	P42684 [931-940]	0	1604.98	0							No Quan Values	Not Found	Not Found	Not Found	Not Found	Not Found	Not Found	Not Found	High	Not Found	Not Found	Not Found	High	3.165e-05	0.0003056	2.76
FALSE	High	[R].IIIEELSLVAASPTLSPR.[Q]	1xPhospho [T/S]; 1xTMT6plex [N-Term]	Q16513 1xPhospho [S/T]	2.61509e-08	0	1	1	2	Q16513	Q16513 [291-308]	0	2218.23	0							No Quan Values	Not Found	Not Found	Not Found	Not Found	Not Found	Not Found	High	Not Found	Not Found	Not Found	Not Found	High	0	4.438e-09	4.96
FALSE	High	[K].ILIANTGMDTDK.[I]	1xTMT6plex [K12]; 1xTMT6plex [N-Term]		0.0139913	0.000209539	1	1	1	P78371	P78371 [237-248]	0	1749.98	0							No Quan Values	Not Found	Not Found	Not Found	Not Found	Not Found	Not Found	Not Found	Not Found	Not Found	High	Not Found	High	0.0001195	0.0008967	2.41
FALSE	High	[K].YGSFEEAEASYPILNR.[A]	1xPhospho [S3]; 1xTMT6plex [N-Term]	O95425 1xPhospho [S968]	0.000332342	0	1	1	1	O95425	O95425 [966-981]	0	2154.99	0							No Quan Values	Not Found	Not Found	Not Found	High	Not Found	Not Found	Not Found	Not Found	Not Found	Not Found	Not Found	High	0	2.723e-05	4.05
FALSE	High	[R].LVGMDPEQASVTNQNEYAR.[S]	1xPhospho [S/T]; 1xTMT6plex [N-Term]	Q5W0Z9 1xPhospho [S/T]	1.97279e-05	0	1	1	2	Q5W0Z9	Q5W0Z9 [296-314]	0	2431.12	0							No Quan Values	Not Found	Not Found	Not Found	High	Not Found	Not Found	Not Found	Not Found	Not Found	Not Found	Not Found	High	0	2.051e-06	3.45
FALSE	High	[K].ADIKSPSLDVTVPEAELNLETPEISVGGK.[G]	1xPhospho [S]; 2xTMT6plex [K4; K29]; 1xTMT6plex [N-Term]	Q09666 1xPhospho [S]	0.0011379	0.000108793	1	1	2	Q09666	Q09666 [4989-5017]	1	3776.02	0							No Quan Values	Not Found	Not Found	Not Found	Not Found	Not Found	Not Found	High	Not Found	Not Found	Not Found	Not Found	High	3.165e-05	0.0001196	4.88
FALSE	High	[R].AGDPGEMPQSPTGLGQPK.[R]	1xPhospho [S10]; 1xTMT6plex [K18]; 1xTMT6plex [N-Term]	Q9UIF9 1xPhospho [S1397]	0.00366497	0.000108793	1	1	1	Q9UIF9	Q9UIF9 [1388-1405]	0	2305.13	0							No Quan Values	Not Found	Not Found	Not Found	Not Found	High	Not Found	Not Found	Not Found	Not Found	Not Found	Not Found	High	3.165e-05	0.0002107	3.44
FALSE	High	[R].AILVDLEPGTMDSVR.[S]	1xOxidation [M11]; 1xTMT6plex [N-Term]		0.00990188	0.000209539	3	4	1	Q13885; Q13509; P07437	Q13885 [63-77]; Q13509 [63-77]; P07437 [63-77]	0	1860.99	0							No Quan Values	Not Found	Not Found	Not Found	Not Found	Not Found	Not Found	Not Found	Not Found	Not Found	High	Not Found	High	6.142e-05	0.0005981	2.58
FALSE	High	[K].NQQEIPSYLNDEPPEGSMK.[D]	1xTMT6plex [K19]; 1xTMT6plex [N-Term]		0.000627488	0	1	1	1	Q8WUH6	Q8WUH6 [7-25]	0	2634.31	0							No Quan Values	Not Found	Not Found	Not Found	Not Found	Not Found	Not Found	Not Found	Not Found	Not Found	High	Not Found	High	0	4.763e-05	3.01
FALSE	High	[K].YTVPLPSPVQDSENLSGESGTFYEGTDDK.[V]	1xPhospho [S7]; 1xTMT6plex [K29]; 1xTMT6plex [N-Term]	P11137 1xPhospho [S881]	0.000237841	0	1	1	1	P11137	P11137 [875-903]	0	3670.71	0							No Quan Values	Not Found	Not Found	Not Found	Not Found	High	Not Found	Not Found	Not Found	Not Found	Not Found	Not Found	High	0	2.014e-05	3.96
FALSE	High	[K].LQIQCVVEDDK.[V]	1xCarbamidomethyl [C5]; 1xTMT6plex [K11]; 1xTMT6plex [N-Term]		0.000949933	0	2	2	1	P29692; P24534	P29692 [243-253]; P24534 [187-197]	0	1804.99	0							No Quan Values	Not Found	Not Found	Not Found	Not Found	Not Found	Not Found	Not Found	Not Found	Not Found	High	Not Found	High	0	6.745e-05	2.73
FALSE	High	[R].MQNNSSPSISPNTSFTSDGSPSPLGGIK.[R]	1xPhospho [S]; 1xTMT6plex [K28]; 1xTMT6plex [N-Term]	Q9H0D6 1xPhospho [S]	3.87941e-06	0	1	1	4	Q9H0D6	Q9H0D6 [466-493]	0	3345.61	0							No Quan Values	Not Found	Not Found	Not Found	Not Found	Not Found	Not Found	High	Not Found	Not Found	Not Found	Not Found	High	0	6.151e-07	3.95
FALSE	High	[R].VSPAHSPPENGLDK.[A]	2xPhospho [S2; S6]; 1xTMT6plex [K14]; 1xTMT6plex [N-Term]	Q04726 2xPhospho [S263; S267]	0.00849566	0.000108793	1	1	1	Q04726	Q04726 [262-275]	0	2065.98	0							No Quan Values	Not Found	High	Not Found	Not Found	Not Found	Not Found	Not Found	Not Found	Not Found	Not Found	Not Found	High	3.165e-05	0.0005012	2.66
FALSE	High	[R].LSPVKGEFHQEFQPEPSLLGDSTNSGEER.[D]	1xPhospho [S2]; 1xTMT6plex [K5]; 1xTMT6plex [N-Term]	Q9Y2L9 1xPhospho [S370]	0.000108706	0	1	1	1	Q9Y2L9	Q9Y2L9 [369-397]	1	3752.82	0							No Quan Values	Not Found	Not Found	Not Found	Not Found	Not Found	High	Not Found	Not Found	Not Found	Not Found	Not Found	High	0	9.904e-06	5.49
FALSE	High	[R].VLSAPPHFHFGQTNR.[T]	1xTMT6plex [N-Term]		0.0245571	0.000295797	1	1	1	P26641	P26641 [31-45]	0	1937.03	0							No Quan Values	High	Not Found	Not Found	Not Found	Not Found	Not Found	Not Found	Not Found	Not Found	Not Found	Not Found	High	0.0001658	0.001849	1.72
FALSE	High	[R].YVDIAIPCNNK.[G]	1xCarbamidomethyl [C8]; 1xTMT6plex [K11]; 1xTMT6plex [N-Term]		0.0226884	0.000295797	1	1	1	P08865	P08865 [156-166]	0	1764.97	0							No Quan Values	Not Found	Not Found	Not Found	Not Found	Not Found	Not Found	Not Found	Not Found	Not Found	High	Not Found	High	0.0001658	0.001662	2.11
FALSE	High	[R].ALQAPHSPSKTDGK.[E]	1xPhospho [S7]; 2xTMT6plex [K10; K14]; 1xTMT6plex [N-Term]	Q96AQ6 1xPhospho [S43]	0.00301949	0.000108793	1	1	1	Q96AQ6	Q96AQ6 [37-50]	1	2204.2	0							No Quan Values	Not Found	Not Found	Not Found	Not Found	Not Found	Not Found	High	Not Found	Not Found	Not Found	Not Found	High	3.165e-05	0.0001767	3.05
FALSE	High	[K].VLPLTTPLVDGEDESSSGASVVAIDNK.[I]	1xTMT6plex [K27]; 1xTMT6plex [N-Term]		7.99649e-08	0	1	1	1	Q15714	Q15714 [957-983]	0	3171.7	0							No Quan Values	Not Found	Not Found	Not Found	Not Found	Not Found	Not Found	Not Found	Not Found	Not Found	High	Not Found	High	0	1.246e-08	4.8
FALSE	High	[K].NQEEEKSGKWEGLVYAPPGK.[E]	1xPhospho [S/Y]; 3xTMT6plex [K6; K9; K20]; 1xTMT6plex [N-Term]	Q9Y2W1 1xPhospho [S/Y]	7.88392e-05	0	1	1	2	Q9Y2W1	Q9Y2W1 [462-481]	2	3242.73	0							No Quan Values	Not Found	Not Found	Not Found	Not Found	Not Found	Not Found	Not Found	High	Not Found	Not Found	Not Found	High	0	7.376e-06	4.67
FALSE	High	[K].LIHPDEDISLEER.[R]	1xTMT6plex [N-Term]		0.000949933	0	1	1	1	O43670	O43670 [363-375]	0	1794.94	0							No Quan Values	Not Found	Not Found	Not Found	Not Found	Not Found	Not Found	Not Found	Not Found	Not Found	High	Not Found	High	0	6.74e-05	3.24
FALSE	High	[R].YVIDYYDGGEVNK.[D]	1xTMT6plex [K13]; 1xTMT6plex [N-Term]		2.28574e-05	0	1	1	1	P53701	P53701 [224-236]	0	1993.03	0							No Quan Values	Not Found	Not Found	Not Found	Not Found	Not Found	Not Found	Not Found	Not Found	Not Found	High	Not Found	High	0	2.357e-06	3.67
FALSE	High	[R].IPEAPAGPPSDFGLFLSDDDPK.[K]	1xTMT6plex [K22]; 1xTMT6plex [N-Term]		0.00209077	0.000108793	1	1	1	Q9Y490	Q9Y490 [36-57]	0	2743.42	0							No Quan Values	Not Found	Not Found	Not Found	Not Found	Not Found	Not Found	Not Found	Not Found	Not Found	High	Not Found	High	3.165e-05	0.0001282	3.48
FALSE	High	[K].VILHLK.[E]	1xTMT6plex [K6]; 1xTMT6plex [N-Term]		0.0630767	0.00158026	2	5	1	P07900; P08238	P07900 [186-191]; P08238 [181-186]	0	1180.82	0							No Quan Values	High	Not Found	Not Found	Not Found	Not Found	Not Found	Not Found	Not Found	Not Found	Not Found	Not Found	High	0.0005341	0.007934	0.95
FALSE	High	[K].NFSLLSFGEEAEEEEEEVNR.[V]	1xTMT6plex [N-Term]		6.54343e-09	0	1	1	1	Q6UX04	Q6UX04 [201-220]	0	2586.2	0							No Quan Values	Not Found	Not Found	Not Found	Not Found	Not Found	Not Found	Not Found	Not Found	Not Found	High	Not Found	High	0	1.225e-09	5.09
FALSE	High	[-].MEPPGGSLGPGRGTR.[D]	1xOxidation [M1]; 1xTMT6plex [N-Term]		0.179155	0.00689042	1	1	1	O60610	O60610 [1-15]	1	1713.89	0							No Quan Values	Not Found	Not Found	Not Found	Not Found	Not Found	High	Not Found	Not Found	Not Found	Not Found	Not Found	High	0.002753	0.04162	2.26
FALSE	High	[R].NFSDNQLQEGK.[N]	1xTMT6plex [K11]; 1xTMT6plex [N-Term]		4.68015e-07	0	1	1	1	P37802	P37802 [161-171]	0	1737.92	0							No Quan Values	Not Found	Not Found	Not Found	Not Found	Not Found	Not Found	Not Found	Not Found	Not Found	High	Not Found	High	0	6.415e-08	4.66
FALSE	High	[R].VLPSISLSPGPQPPK.[S]	1xPhospho [S]; 1xTMT6plex [K15]; 1xTMT6plex [N-Term]		0.00515185	0.000108793	0	1	2			0	2055.17	0							No Quan Values	Not Found	Not Found	Not Found	Not Found	Not Found	Not Found	Not Found	High	Not Found	Not Found	Not Found	High	3.165e-05	0.0002945	1.96
FALSE	High	[R].YLAEVAAGDDK.[K]	1xTMT6plex [K11]; 1xTMT6plex [N-Term]		2.44459e-06	0	1	1	1	P63104	P63104 [128-138]	0	1609.88	0							No Quan Values	Not Found	Not Found	Not Found	Not Found	Not Found	Not Found	Not Found	Not Found	Not Found	High	Not Found	High	0	2.965e-07	3.9
FALSE	High	[K].YKPESEELTAER.[I]	1xTMT6plex [K2]; 1xTMT6plex [N-Term]		0.00356835	0.000108793	1	1	1	P07237	P07237 [327-338]	0	1910.03	0							No Quan Values	Not Found	Not Found	Not Found	Not Found	Not Found	Not Found	Not Found	Not Found	Not Found	High	Not Found	High	3.165e-05	0.0002053	3.76
FALSE	High	[R].NPWGEVEWTGAWSDSSSEWNNVDPYER.[D]	1xTMT6plex [N-Term]		1.43146e-07	0	1	1	1	P07384	P07384 [296-322]	0	3426.51	0							No Quan Values	Not Found	Not Found	Not Found	Not Found	Not Found	Not Found	Not Found	Not Found	Not Found	High	Not Found	High	0	2.135e-08	4.48
FALSE	High	[R].ALLVTASQCQQPAENK.[L]	1xCarbamidomethyl [C9]; 1xTMT6plex [K16]; 1xTMT6plex [N-Term]		1.13956e-05	0	1	1	1	Q01518	Q01518 [85-100]	0	2216.21	0							No Quan Values	Not Found	Not Found	Not Found	Not Found	Not Found	Not Found	Not Found	Not Found	Not Found	High	Not Found	High	0	1.237e-06	4.13
FALSE	High	[R].AGKPVICATQMLESMIK.[K]	1xCarbamidomethyl [C7]; 2xTMT6plex [K3; K17]; 1xTMT6plex [N-Term]		0.00288151	0.000108793	1	1	1	P14618	P14618 [320-336]	0	2564.46	0							No Quan Values	High	Not Found	Not Found	Not Found	Not Found	Not Found	Not Found	Not Found	Not Found	Not Found	Not Found	High	3.165e-05	0.000169	2.81
FALSE	High	[K].NHLSPQQGGATPQVPSPCCR.[F]	2xCarbamidomethyl [C18; C19]; 1xPhospho [S16]; 1xTMT6plex [N-Term]	Q9H4L4 1xPhospho [S181]	0.0247195	0.000295797	1	1	1	Q9H4L4	Q9H4L4 [166-185]	0	2500.14	0							No Quan Values	Not Found	Not Found	Not Found	Not Found	Not Found	High	Not Found	Not Found	Not Found	Not Found	Not Found	High	0.0001658	0.001858	2.23
FALSE	High	[R].NSASATTPLSGNSSR.[R]	2xPhospho [T/S]; 1xTMT6plex [N-Term]	Q9Y608 2xPhospho [T/S]	0.0315254	0.000389981	1	1	3	Q9Y608	Q9Y608 [311-325]	0	1838.79	0							No Quan Values	Not Found	Not Found	Not Found	Not Found	Not Found	Not Found	Not Found	Not Found	Not Found	Not Found	High	High	0.0007236	0.01094	2.2
FALSE	High	[R].AGSLQLSSMSAGNSSLRR.[T]	1xPhospho [S]; 1xTMT6plex [N-Term]	Q53SF7 1xPhospho [S]	0.00145726	0.000108793	1	1	2	Q53SF7	Q53SF7 [342-359]	1	2131.05	0							No Quan Values	Not Found	Not Found	Not Found	Not Found	Not Found	Not Found	Not Found	High	Not Found	Not Found	Not Found	High	3.165e-05	9.536e-05	2.69
FALSE	High	[K].ADVDISGPK.[IV]	1xTMT6plex [K9]; 1xTMT6plex [N-Term]		0.186564	0.00721218	1	1	1	Q09666	Q09666 [776-784]; [904-912]; [2537-2545]	0	1359.79	0							No Quan Values	Not Found	Not Found	Not Found	Not Found	Not Found	High	Not Found	Not Found	Not Found	Not Found	Not Found	High	0.002925	0.04418	1.57
FALSE	High	[K].NEEENENSISQYK.[E]	1xTMT6plex [K13]; 1xTMT6plex [N-Term]		0.00290083	0.000108793	1	1	1	P82673	P82673 [301-313]	0	2042.01	0							No Quan Values	Not Found	Not Found	Not Found	Not Found	Not Found	Not Found	Not Found	Not Found	Not Found	High	Not Found	High	3.165e-05	0.0001702	2.67
FALSE	High	[K].AAFQPEANPSHLTLNTALVESEDL.[-]	1xTMT6plex [N-Term]		0.00152708	0.000108793	1	1	1	Q8WX93	Q8WX93 [1360-1383]	0	2796.43	0							No Quan Values	Not Found	Not Found	Not Found	Not Found	Not Found	Not Found	Not Found	Not Found	Not Found	High	Not Found	High	3.165e-05	9.927e-05	5.42
FALSE	High	[R].AGAGMITQHSSNASPINR.[I]	1xPhospho [S/T]; 1xOxidation [M5]; 1xTMT6plex [N-Term]	Q9NWH9 1xPhospho [T/S]	0.0186069	0.000295797	1	1	2	Q9NWH9	Q9NWH9 [989-1006]	0	2137.01	0							No Quan Values	Not Found	Not Found	Not Found	Not Found	High	Not Found	Not Found	Not Found	Not Found	Not Found	Not Found	High	0.0003628	0.005941	2.69
FALSE	High	[R].VLLSPSIPSVGQDQTLSPGSK.[Q]	1xPhospho [S]; 1xTMT6plex [K21]; 1xTMT6plex [N-Term]	Q13625 1xPhospho [S]	0.000452113	0	1	1	3	Q13625	Q13625 [553-573]	0	2648.43	0							No Quan Values	Not Found	Not Found	Not Found	Not Found	Not Found	Not Found	High	Not Found	Not Found	Not Found	Not Found	High	0	3.582e-05	3.48
FALSE	High	[R].AEDNADTLALVFEAPNQEK.[V]	1xTMT6plex [K19]; 1xTMT6plex [N-Term]		2.47936e-09	0	1	1	1	P12004	P12004 [92-110]	0	2533.32	0							No Quan Values	Not Found	Not Found	Not Found	Not Found	Not Found	Not Found	Not Found	Not Found	Not Found	High	Not Found	High	0	4.99e-10	5.79
FALSE	High	[R].WEAAEGLLQEALDK.[D]	1xTMT6plex [K14]; 1xTMT6plex [N-Term]		6.89824e-06	0	1	1	1	O14579	O14579 [232-245]	0	2031.12	0							No Quan Values	Not Found	Not Found	Not Found	Not Found	Not Found	Not Found	Not Found	Not Found	Not Found	High	Not Found	High	0	7.767e-07	4.14
FALSE	High	[K].AGCECLNESDEHGFDNCLR.[K]	3xCarbamidomethyl [C3; C5; C17]; 1xTMT6plex [N-Term]		2.01332e-06	0	1	1	1	O43396	O43396 [133-151]	0	2512.05	0							No Quan Values	Not Found	Not Found	Not Found	Not Found	Not Found	Not Found	Not Found	Not Found	Not Found	High	Not Found	High	0	2.485e-07	4.49
FALSE	High	[R].AQSPVSGPNVAHLTDGATLNDR.[S]	1xPhospho [S3]; 1xTMT6plex [N-Term]	Q5THJ4 1xPhospho [S1042]	0.00462996	0.000108793	1	1	1	Q5THJ4	Q5THJ4 [1040-1061]	0	2529.23	0							No Quan Values	Not Found	Not Found	Not Found	Not Found	High	Not Found	Not Found	Not Found	Not Found	Not Found	Not Found	High	3.165e-05	0.0002642	3.55
FALSE	High	[R].NQYDNDVTVWSPQGR.[I]	1xTMT6plex [N-Term]		7.63236e-09	0	1	1	1	P25786	P25786 [4-18]	0	2007.97	0							No Quan Values	Not Found	Not Found	Not Found	Not Found	Not Found	Not Found	Not Found	Not Found	Not Found	High	Not Found	High	0	1.416e-09	5.53
FALSE	High	[K].MDTCSSNLNNSIYKK.[L]	1xCarbamidomethyl [C4]; 1xPhospho [S11]; 2xTMT6plex [K14; K15]; 1xTMT6plex [N-Term]	P25116 1xPhospho [S418]	4.90463e-07	0	1	1	3	P25116	P25116 [408-422]	1	2542.26	0	129.7	114.6	115.4	146.3	133.5	51.6		Not Found	Not Found	Not Found	Not Found	Not Found	Not Found	High	Not Found	Not Found	Not Found	Not Found	High	0	2.696e-07	5.1
FALSE	High	[K].SCVEEPEPEPEAAEGDGDKK.[G]	1xCarbamidomethyl [C2]; 2xTMT6plex [K19; K20]; 1xTMT6plex [N-Term]		1.25243e-08	0	1	1	1	P51858	P51858 [107-126]	1	2860.41	0	100.9	125.5	104.8	123.9	85.4	48.9		Not Found	Not Found	Not Found	Not Found	Not Found	Not Found	Not Found	Not Found	Not Found	High	Not Found	High	0	2.238e-09	5.84
FALSE	High	[R].SADELENLILQQN.[-]	1xTMT6plex [N-Term]		0.15748	0.00556977	1	2	1	Q96MY1	Q96MY1 [424-436]	0	1715.9	0	88.7	103.9	95.7	86.9	99.9	128.7		Not Found	Not Found	Not Found	Not Found	Not Found	Not Found	Not Found	Not Found	Not Found	High	Not Found	High	0.002091	0.03478	2.51
FALSE	High	[K].MGSDGESDQASGTSSDEVQSPTGVCLR.[N]	1xCarbamidomethyl [C25]; 1xPhospho [S20]; 1xTMT6plex [N-Term]	Q00537 1xPhospho [S122]	2.51277e-09	0	1	1	4	Q00537	Q00537 [103-129]	0	3066.29	0	102.9	93.3	100.7	91.3	102.7	113.2		High	High	High	Not Found	Not Found	Not Found	Not Found	Not Found	Not Found	Not Found	High	High	0	5.04e-10	5.9
FALSE	High	[R].MGPSGGEGMEPERRDSQDGSSYR.[R]	1xPhospho [S16]; 1xOxidation [M]; 1xTMT6plex [N-Term]	Q14847 1xPhospho [S146]	0.000153951	0	1	1	9	Q14847	Q14847 [131-153]	2	2810.17	0	79.6	80.5	89.5	122.9	105	127		High	High	High	Not Found	Not Found	Not Found	Not Found	Not Found	Not Found	Not Found	High	High	3.165e-05	0.0003329	4.66
FALSE	High	[K].MDTCSSNLNNSIYKK.[L]	1xCarbamidomethyl [C4]; 1xPhospho [S11]; 1xOxidation [M1]; 2xTMT6plex [K14; K15]; 1xTMT6plex [N-Term]	P25116 1xPhospho [S418]	0.00723982	0.000108793	1	1	1	P25116	P25116 [408-422]	1	2558.26	0	121.1	113.4	115.8	142.9	110.9	53.6		Not Found	Not Found	Not Found	Not Found	Not Found	High	Not Found	Not Found	Not Found	Not Found	Not Found	High	3.165e-05	0.0004214	3.42
FALSE	High	[K].SCVLFNCAALASQIAAEQNLDNDEGLK.[I]	2xCarbamidomethyl [C2; C7]; 1xTMT6plex [K27]; 1xTMT6plex [N-Term]		8.60952e-09	0	1	1	1	Q8WUM4	Q8WUM4 [121-147]	0	3409.71	0	95.3	105.2	90	119.2	96.7	79.3		Not Found	Not Found	Not Found	Not Found	Not Found	Not Found	Not Found	Not Found	Not Found	High	Not Found	High	0	1.582e-09	6.21
FALSE	High	[K].SADGSAPAGEGEGVTLQR.[N]	1xPhospho [S]; 1xTMT6plex [N-Term]	Q01650 1xPhospho [S]	0.000109436	0	1	1	3	Q01650	Q01650 [31-48]	0	2010.93	0	86.1	73.6	103.4	87.5	112.9	135.7		High	Not Found	Not Found	Not Found	Not Found	Not Found	Not Found	Not Found	Not Found	Not Found	High	High	0	2.064e-05	3.62
FALSE	High	[K].SADESGQALLAAGHYASDEVR.[E]	1xTMT6plex [N-Term]		7.58888e-13	0	1	1	1	Q13813	Q13813 [419-439]	0	2376.16	0	97.6	91.4	99.8	97.3	103.6	120		Not Found	Not Found	Not Found	Not Found	Not Found	Not Found	Not Found	Not Found	Not Found	High	Not Found	High	0	2.772e-13	7.13
FALSE	High	[R].MGQAPSQSLLPPAQDQPRSPVPSAFSDQSR.[C]	1xPhospho [S]; 1xOxidation [M1]; 1xTMT6plex [N-Term]	Q9UQ35 1xPhospho [S]	2.9697e-08	0	1	1	9	Q9UQ35	Q9UQ35 [2431-2460]	1	3504.68	0	97.3	97.3	98.7	101.1	107.5	90.7		Not Found	Not Found	Not Found	Not Found	High	High	High	Not Found	Not Found	Not Found	Not Found	High	0	1.093e-07	5.88
FALSE	High	[R].MGQAGSTISNSHAQPFDFPDDNQNSK.[K]	1xPhospho [S]; 1xTMT6plex [K26]; 1xTMT6plex [N-Term]	P17302 1xPhospho [S]	4.26048e-06	0	1	1	2	P17302	P17302 [320-345]	0	3331.51	0	97.3	96.3	92.2	106.5	114	83.2		Not Found	Not Found	Not Found	Not Found	Not Found	High	Not Found	Not Found	Not Found	Not Found	Not Found	High	0	1.182e-06	5.09
FALSE	High	[K].SADFVVEAIGDDVGTLGFSVEGPSQAK.[I]	1xTMT6plex [K27]; 1xTMT6plex [N-Term]		2.19903e-11	0	1	1	7	P21333	P21333 [594-620]	0	3153.64	0	96.2	84.9	95.3	96.3	111.9	121.7		Not Found	Not Found	Not Found	Not Found	Not Found	Not Found	Not Found	Not Found	Not Found	High	Not Found	High	0	6.24e-12	6.24
FALSE	High	[R].SADEPMTTFVVCNECGNR.[W]	2xCarbamidomethyl [C12; C15]; 1xTMT6plex [N-Term]		1.08069e-07	0	1	1	1	P23193	P23193 [280-297]	0	2316.03	0	86.5	99.2	103.3	103.2	96.1	124.1		Not Found	Not Found	Not Found	Not Found	Not Found	Not Found	Not Found	Not Found	Not Found	High	Not Found	High	0	1.646e-08	4.62
FALSE	High	[R].MGPSGGEGMEPERRDSQDGSSYR.[R]	1xPhospho [S16]; 2xOxidation [M1; M9]; 1xTMT6plex [N-Term]	Q14847 1xPhospho [S146]	0.00584831	0.000108793	1	1	4	Q14847	Q14847 [131-153]	2	2826.17	0	75.6	78.6	97.1	128.1	111	111.4		High	Not Found	High	Not Found	Not Found	Not Found	Not Found	Not Found	Not Found	Not Found	High	High	3.165e-05	0.0003354	3.6
FALSE	High	[R].SCTPSPDQISHR.[A]	1xCarbamidomethyl [C2]; 1xPhospho [S5]; 1xTMT6plex [N-Term]	Q7Z2W4 1xPhospho [S275]	1.99938e-05	0	1	1	4	Q7Z2W4	Q7Z2W4 [271-282]	0	1693.76	0	90.8	84.2	86.6	86.9	115.5	146.1		High	High	High	Not Found	Not Found	Not Found	Not Found	Not Found	Not Found	Not Found	High	High	0	2.072e-06	3.88
FALSE	High	[R].SAASPVVSSMPER.[A]	1xPhospho [S4]; 1xOxidation [M10]; 1xTMT6plex [N-Term]	P18583 1xPhospho [S1769]	0.0763257	0.00210549	1	1	3	P18583	P18583 [1766-1778]	0	1642.77	0	84	67.8	88.1	72.8	118.8	172.2		Not Found	High	High	Not Found	Not Found	Not Found	Not Found	Not Found	Not Found	Not Found	Not Found	High	0.001286	0.02294	2.23
FALSE	High	[R].SAGEEEDGPVLTDEQK.[S]	1xPhospho [S1]; 1xTMT6plex [K16]; 1xTMT6plex [N-Term]	Q66PJ3 1xPhospho [S332]	4.87191e-07	0	1	1	5	Q66PJ3	Q66PJ3 [332-347]	0	2242.05	0	99.5	107.6	101.9	109.6	98.9	69		High	Not Found	Not Found	Not Found	Not Found	Not Found	Not Found	Not Found	Not Found	Not Found	High	High	0	6.637e-08	4.76
FALSE	High	[R].SAGEEEDGPVLTDEQK.[S]	1xTMT6plex [K16]; 1xTMT6plex [N-Term]		2.51277e-09	0	1	1	1	Q66PJ3	Q66PJ3 [332-347]	0	2162.09	0	97.8	101.2	106.1	100.6	99.8	91.6		Not Found	Not Found	Not Found	Not Found	Not Found	Not Found	Not Found	Not Found	Not Found	High	Not Found	High	0	5.048e-10	4.61
FALSE	High	[R].SAFTPATATGSSPSPVLGQGEK.[V]	2xPhospho [S12; S]; 1xTMT6plex [K22]; 1xTMT6plex [N-Term]	Q15811 2xPhospho [S902; S]	0.00686373	0.000108793	1	1	2	Q15811	Q15811 [891-912]	0	2708.3	0	94.5	90.8	89.9	111.2	113.8	108.1		Not Found	Not Found	Not Found	Not Found	High	Not Found	Not Found	Not Found	Not Found	Not Found	Not Found	High	3.165e-05	0.000397	3.29
FALSE	High	[R].SAFTPATATGSSPSPVLGQGEK.[V]	1xPhospho [S/T]; 1xTMT6plex [K22]; 1xTMT6plex [N-Term]	Q15811 1xPhospho [S/T]	3.05252e-11	0	1	1	15	Q15811	Q15811 [891-912]	0	2628.33	0	98.4	101.5	101.1	110.3	99.9	76.3		Not Found	Not Found	Not Found	Not Found	Not Found	High	High	High	High	Not Found	Not Found	High	0	8.492e-12	6.75
FALSE	High	[K].SCSGVEFSTSGSSNTDTGK.[V]	1xCarbamidomethyl [C2]; 1xTMT6plex [K19]; 1xTMT6plex [N-Term]		3.88227e-09	0	1	1	1	P45880	P45880 [46-64]	0	2366.12	0	106.7	99.7	104.3	92	103	107.8		Not Found	Not Found	Not Found	Not Found	Not Found	Not Found	Not Found	Not Found	Not Found	High	Not Found	High	0	7.569e-10	5.1
FALSE	High	[K].SAETNIDQDINNLK.[E]	1xTMT6plex [K14]; 1xTMT6plex [N-Term]		4.14682e-05	0	1	1	1	Q03001	Q03001 [6560-6573]	0	2033.09	0	92.6	97.6	100.7	90.5	103.8	118		Not Found	Not Found	Not Found	Not Found	Not Found	Not Found	Not Found	Not Found	Not Found	High	Not Found	High	0	4.079e-06	3.98
FALSE	High	[K].SAESPTSPVTSETGSTFK.[K]	1xPhospho [S/T]; 1xTMT6plex [K18]; 1xTMT6plex [N-Term]	Q02952 1xPhospho [T/S]	2.72019e-05	0	1	1	18	Q02952	Q02952 [280-297]	0	2351.14	0	88.9	93	87.8	100.1	91.5	82.3		Not Found	Not Found	Not Found	High	High	Not Found	Not Found	Not Found	Not Found	Not Found	Not Found	High	0	6.083e-06	4.75
FALSE	High	[R].RVSLSEIGFGK.[L]	1xPhospho [S3]; 1xTMT6plex [K11]; 1xTMT6plex [N-Term]	Q00536 1xPhospho [S153]	2.21052e-05	0	1	1	3	Q00536	Q00536 [151-161]	1	1730.96	0	85.1	83.3	91.2	96.4	104.4	120		Not Found	Not Found	Not Found	Not Found	Not Found	Not Found	Not Found	High	Not Found	Not Found	Not Found	High	0	2.282e-06	4.99
FALSE	High	[R].SCSLVLEHQPDNIK.[A]	1xCarbamidomethyl [C2]; 1xPhospho [S]; 1xTMT6plex [K14]; 1xTMT6plex [N-Term]	Q14318 1xPhospho [S]	0.0986764	0.00260894	1	1	2	Q14318	Q14318 [294-307]	0	2178.1	0	102.4	98.4	99.3	90.6	103.3	110.5		Not Found	Not Found	Not Found	Not Found	High	Not Found	Not Found	Not Found	Not Found	Not Found	Not Found	High	0.0009733	0.01629	2.87
FALSE	High	[K].SCVEEPEPEPEAAEGDGDK.[K]	1xCarbamidomethyl [C2]; 1xTMT6plex [K19]; 1xTMT6plex [N-Term]		8.26861e-08	0	1	1	1	P51858	P51858 [107-125]	0	2503.15	0	97.9	115.1	101.3	100.5	95.5	87.5		Not Found	Not Found	Not Found	Not Found	Not Found	Not Found	Not Found	Not Found	Not Found	High	Not Found	High	0	1.289e-08	5.05
FALSE	High	[R].RVSQDLEVEKPDASPTSLQLR.[S]	1xPhospho [S3]; 1xTMT6plex [K10]; 1xTMT6plex [N-Term]	O94885 1xPhospho [S90]	0.00456855	0.000108793	1	1	1	O94885	O94885 [88-108]	1	2906.54	0	101.3	103.1	100.5	106.2	97.9	83.7		Not Found	Not Found	Not Found	Not Found	Not Found	High	Not Found	Not Found	Not Found	Not Found	Not Found	High	3.165e-05	0.0002612	4.63
FALSE	High	[K].SAEPSPTVMSTSLGSNLSELDR.[L]	1xPhospho [S/T]; 1xTMT6plex [N-Term]	P49023 1xPhospho [S/T]	2.01332e-06	0	1	1	4	P49023	P49023 [126-147]	0	2587.22	0	107.8	95.2	97.4	88.7	107.8	112.9		Not Found	Not Found	Not Found	High	High	Not Found	Not Found	Not Found	Not Found	Not Found	Not Found	High	0	6.036e-07	3.84
FALSE	High	[R].SAEPRPELGPGQETGTNSR.[G]	1xPhospho [T/S]; 1xTMT6plex [N-Term]	Q9Y4B5 1xPhospho [T/S]	0.000894446	0	1	1	7	Q9Y4B5	Q9Y4B5 [1791-1809]	0	2292.08	0	87.1	95.3	92.6	92.7	113.6	124		High	High	High	Not Found	Not Found	Not Found	Not Found	Not Found	Not Found	Not Found	High	High	0.0001904	0.003022	4.69
FALSE	High	[R].RVSQNSLGEMTK.[L]	1xPhospho [S3]; 1xTMT6plex [K12]; 1xTMT6plex [N-Term]	Q9ULH0 1xPhospho [S882]	0.00322812	0.000108793	1	1	1	Q9ULH0	Q9ULH0 [880-891]	1	1887.98	0	95.8	95	91.3	115.8	96.5	105.4		Not Found	Not Found	Not Found	Not Found	Not Found	High	Not Found	Not Found	Not Found	Not Found	Not Found	High	3.165e-05	0.0001875	3.42
FALSE	High	[K].SCSPLAFSAFGDLTIK.[S]	1xCarbamidomethyl [C2]; 1xPhospho [S1]; 1xTMT6plex [K16]; 1xTMT6plex [N-Term]	Q96EY5 1xPhospho [S230]	0.00107863	0.000108793	1	1	1	Q96EY5	Q96EY5 [230-245]	0	2252.14	0	93.9	105.5	102.2	97	89.6	110.8		Not Found	Not Found	Not Found	Not Found	Not Found	Not Found	Not Found	High	Not Found	Not Found	Not Found	High	3.165e-05	7.469e-05	3.78
FALSE	High	[R].MGPSGGEGMEPERRDSQDGSSYR.[R]	1xPhospho [Y/S]; 1xTMT6plex [N-Term]	Q14847 1xPhospho [Y/S]	1.86994e-05	0	1	1	10	Q14847	Q14847 [131-153]	2	2794.18	0	83.8	120.2	92.5	125.8	86.2	91.5		High	High	High	Not Found	Not Found	Not Found	Not Found	Not Found	Not Found	Not Found	High	High	0	1.954e-06	4.89
FALSE	High	[K].SAEIDSDDTGGSAAQK.[Q]	1xTMT6plex [K16]; 1xTMT6plex [N-Term]		5.95524e-07	0	1	1	1	P33176	P33176 [814-829]	0	2010	0	96.2	91.4	104.6	100.6	105.2	84.3		Not Found	Not Found	Not Found	Not Found	Not Found	Not Found	Not Found	Not Found	Not Found	High	Not Found	High	0	8.042e-08	4.16
FALSE	High	[R].SDLPGSDKDTEDGSAWK.[Q]	1xPhospho [S6]; 2xTMT6plex [K8; K17]; 1xTMT6plex [N-Term]	Q15599 1xPhospho [S280]	0.00234235	0.000108793	1	1	1	Q15599	Q15599 [275-291]	1	2575.25	0	103.5	107	104.7	127.2	88.9	50.6		Not Found	Not Found	Not Found	Not Found	High	Not Found	Not Found	Not Found	Not Found	Not Found	Not Found	High	3.165e-05	0.0001413	2.92
FALSE	High	[R].SAEEGELAESK.[S]	1xPhospho [S1]; 1xTMT6plex [K11]; 1xTMT6plex [N-Term]	Q9C0C2 1xPhospho [S1666]	0.00011017	0	1	1	6	Q9C0C2	Q9C0C2 [1666-1676]	0	1687.82	0	114.1	125.2	106.2	85.3	90.9	84.6		High	High	High	Not Found	Not Found	Not Found	Not Found	Not Found	Not Found	Not Found	High	High	0	1.001e-05	3.6
FALSE	High	[R].SADLPHSFK.[L]	1xPhospho [S1]; 1xTMT6plex [K9]; 1xTMT6plex [N-Term]	Q96M96 1xPhospho [S702]	0.00896069	0.000209539	1	1	4	Q96M96	Q96M96 [702-710]	0	1539.8	0	99.1	100.4	97.4	93.5	92.6	76.4		Not Found	Not Found	Not Found	Not Found	High	High	Not Found	Not Found	Not Found	Not Found	Not Found	High	6.142e-05	0.0005324	3.37
FALSE	High	[K].SAEPSPTVMSTSLGSNLSELDR.[L]	1xPhospho [S12]; 1xOxidation [M9]; 1xTMT6plex [N-Term]	P49023 1xPhospho [S137]	6.03697e-08	0	1	1	2	P49023	P49023 [126-147]	0	2603.21	0	88.1	96	93.2	85.4	96.5	116.9		Not Found	High	Not Found	Not Found	Not Found	Not Found	Not Found	Not Found	Not Found	Not Found	Not Found	High	0	9.604e-09	4.03
FALSE	High	[R].SAASPVVSSMPER.[A]	1xPhospho [S4]; 1xTMT6plex [N-Term]	P18583 1xPhospho [S1769]	0.00314299	0.000108793	1	1	2	P18583	P18583 [1766-1778]	0	1626.78	0	103.7	102	103.7	93.9	84.6	89		Not Found	High	High	Not Found	Not Found	Not Found	Not Found	Not Found	Not Found	Not Found	Not Found	High	9.162e-05	0.0007336	2.91
FALSE	High	[R].RVSVCAETYNPDEEEEDTDPR.[V]	1xCarbamidomethyl [C5]; 1xPhospho [S3]; 1xTMT6plex [N-Term]	P13861 1xPhospho [S99]	3.65443e-08	0	1	1	8	P13861	P13861 [97-117]	1	2820.19	0	103.8	83.7	95.7	81.7	119.6	130.5		High	High	High	Not Found	Not Found	Not Found	Not Found	Not Found	Not Found	Not Found	High	High	0	6.027e-09	6.59
FALSE	High	[R].MGQAPSQSLLPPAQDQPRSPVPSAFSDQSR.[C]	1xPhospho [S]; 1xTMT6plex [N-Term]	Q9UQ35 1xPhospho [S]	6.32963e-10	0	1	1	13	Q9UQ35	Q9UQ35 [2431-2460]	1	3488.68	0	91.8	85.1	107.2	108.6	114.8	99.1		Not Found	Not Found	Not Found	Not Found	Not Found	High	High	High	Not Found	Not Found	Not Found	High	0	2.902e-09	6.12
FALSE	High	[R].MDTDLETMDLDQGGEALAPR.[Q]	1xTMT6plex [N-Term]		7.18795e-10	0	1	1	1	O75643	O75643 [387-406]	0	2407.13	0	91.2	99.6	87.8	95.7	112.4	125.8		Not Found	Not Found	Not Found	Not Found	Not Found	Not Found	Not Found	Not Found	Not Found	High	Not Found	High	0	1.58e-10	5.69
FALSE	High	[R].RYSASLPAPVK.[L]	1xPhospho [S3]; 1xTMT6plex [K11]; 1xTMT6plex [N-Term]	Q5VTQ0 1xPhospho [S524]	0.201008	0.00852602	1	1	1	Q5VTQ0	Q5VTQ0 [522-532]	1	1726.97	0	71.2	107.5	69.9	108.8	115	121.3		Not Found	Not Found	Not Found	Not Found	Not Found	Not Found	High	Not Found	Not Found	Not Found	Not Found	High	0.003332	0.04908	2.5
FALSE	High	[K].RYPTPYPDELK.[N]	1xPhospho [T4]; 1xTMT6plex [K11]; 1xTMT6plex [N-Term]	Q96RT1 1xPhospho [T485]	0.00728825	0.000108793	1	1	1	Q96RT1	Q96RT1 [482-492]	1	1916.99	0	108.5	94.6	96.9	104.8	112.8	81.8		Not Found	Not Found	Not Found	Not Found	High	Not Found	Not Found	Not Found	Not Found	Not Found	Not Found	High	3.165e-05	0.0004223	3.12
FALSE	High	[R].SDDYMPMSPASVSAPK.[Q]	1xPhospho [S8]; 1xTMT6plex [K16]; 1xTMT6plex [N-Term]	Q9Y4H2 1xPhospho [S679]	3.8268e-05	0	1	1	1	Q9Y4H2	Q9Y4H2 [672-687]	0	2221.03	0	102.1	117.9	99.6	101.1	88.6	74.9		Not Found	Not Found	Not Found	Not Found	High	Not Found	Not Found	Not Found	Not Found	Not Found	Not Found	High	0	3.779e-06	3.74
FALSE	High	[R].SDEGQLSPATR.[G]	1xPhospho [S/T]; 1xTMT6plex [N-Term]	Q15149 1xPhospho [S/T]	0.000390232	0	1	1	15	Q15149	Q15149 [714-724]	0	1469.68	0	106.1	84.7	101.2	88.2	107.2	112.1		High	High	High	High	Not Found	High	High	High	High	Not Found	High	High	3.165e-05	0.0001396	3.93
FALSE	High	[K].SDENEDPSVVGEFK.[G]	1xTMT6plex [K14]; 1xTMT6plex [N-Term]		6.94799e-08	0	1	1	1	Q9NZM1	Q9NZM1 [1508-1521]	0	2010.01	0	120.1	101.4	104.6	95.1	109.4	89.6		Not Found	Not Found	Not Found	Not Found	Not Found	Not Found	Not Found	Not Found	Not Found	High	Not Found	High	0	1.098e-08	3.9
FALSE	High	[R].RYPSSISSSPQK.[D]	1xPhospho [S]; 1xTMT6plex [K12]; 1xTMT6plex [N-Term]	Q14157 1xPhospho [S]	0.00371426	0.000108793	1	1	9	Q14157	Q14157 [601-612]	1	1874.98	0	94.5	101	106.9	104.8	96.7	73.7		Not Found	Not Found	Not Found	Not Found	Not Found	High	High	High	Not Found	Not Found	Not Found	High	3.165e-05	0.0002135	4.11
FALSE	High	[K].SDGAPASDSKPGSSEAAPSSK.[E]	1xPhospho [S14]; 2xTMT6plex [K10; K21]; 1xTMT6plex [N-Term]	P80723 1xPhospho [S177]	0.000157073	0	1	1	1	P80723	P80723 [164-184]	0	2700.33	0	120.6	129.9	99.1	91.2	90.5	78.3		Not Found	Not Found	Not Found	Not Found	High	Not Found	Not Found	Not Found	Not Found	Not Found	Not Found	High	0	1.382e-05	4.58
FALSE	High	[K].SDGSDTTEQESTNLPSPNK.[S]	1xPhospho [S16]; 1xTMT6plex [K19]; 1xTMT6plex [N-Term]	Q68DQ2 1xPhospho [S457]	2.57905e-06	0	1	1	2	Q68DQ2	Q68DQ2 [442-460]	0	2545.17	0	103.8	100.9	93.1	96.1	95.5	108.2		Not Found	High	High	Not Found	Not Found	Not Found	Not Found	Not Found	Not Found	Not Found	Not Found	High	0	3.111e-07	3.76
FALSE	High	[K].MEDSVGCLETAEEVK.[R]	1xCarbamidomethyl [C7]; 1xTMT6plex [K15]; 1xTMT6plex [N-Term]		1.23608e-09	0	1	1	1	P35579	P35579 [1373-1387]	0	2155.07	0	112	107	109.8	97.4	95.7	76.6		Not Found	Not Found	Not Found	Not Found	Not Found	Not Found	Not Found	Not Found	Not Found	High	Not Found	High	0	2.61e-10	4.66
FALSE	High	[K].RYEPSDKDRQSPPPAK.[R]	1xPhospho [S11]; 2xTMT6plex [K7; K16]; 1xTMT6plex [N-Term]	Q86VM9 1xPhospho [S842]	0.0576675	0.00130733	1	1	1	Q86VM9	Q86VM9 [832-847]	3	2638.4	0	93.1	83.4	121.4	82.9	103.6	98.9		Not Found	Not Found	Not Found	Not Found	Not Found	High	Not Found	Not Found	Not Found	Not Found	Not Found	High	0.0004359	0.006892	2.67
FALSE	High	[K].MEAENLEQLIDQK.[L]	1xTMT6plex [K13]; 1xTMT6plex [N-Term]		4.09168e-05	0	1	1	1	P11047	P11047 [1291-1303]	0	2019.08	0	98.4	96.3	102.8	84.7	108.3	128.3		Not Found	Not Found	Not Found	Not Found	Not Found	Not Found	Not Found	Not Found	Not Found	High	Not Found	High	0	4.036e-06	3.82
FALSE	High	[R].SDGSGESAQPPEDSSPPASSESSSTR.[D]	1xTMT6plex [N-Term]		8.05807e-12	0	1	1	1	Q7Z6Z7	Q7Z6Z7 [2904-2929]	0	2765.22	0	104.9	92	91.9	88.3	124.3	127.7		Not Found	Not Found	Not Found	Not Found	Not Found	Not Found	Not Found	Not Found	Not Found	High	Not Found	High	0	2.467e-12	6.41
FALSE	High	[K].SDKKPDREEIQMSNMGSNTK.[S]	1xPhospho [S1]; 3xTMT6plex [K3; K4; K20]; 1xTMT6plex [N-Term]	O60716 1xPhospho [S879]	0.00633578	0.000108793	1	1	2	O60716	O60716 [879-898]	2	3291.69	0	103.3	134.6	110.7	111.7	82	38.2		Not Found	Not Found	Not Found	Not Found	Not Found	High	High	Not Found	Not Found	Not Found	Not Found	High	3.165e-05	0.000364	4.61
FALSE	High	[K].MDVNVGDIDIEGPEGK.[L]	1xTMT6plex [K16]; 1xTMT6plex [N-Term]		1.69218e-07	0	1	1	2	Q09666	Q09666 [1620-1635]	0	2146.11	0	102.2	102.7	96.3	98	108.2	91		Not Found	Not Found	Not Found	Not Found	Not Found	Not Found	Not Found	Not Found	Not Found	High	Not Found	High	0	2.497e-08	4.88
FALSE	High	[R].RYEDDGISDDEIEGK.[R]	1xPhospho [S8]; 1xTMT6plex [K15]; 1xTMT6plex [N-Term]	Q9Y2K7 1xPhospho [S28]	4.43615e-07	0	1	1	1	Q9Y2K7	Q9Y2K7 [21-35]	1	2279.05	0	101.5	107.9	96.9	102.1	105.2	85.6		Not Found	Not Found	Not Found	Not Found	Not Found	Not Found	Not Found	Not Found	Not Found	Not Found	High	High	0	6.107e-08	4.97
FALSE	High	[R].SDGSGESAQPPEDSSPPASSESSSTR.[D]	1xPhospho [S]; 1xTMT6plex [N-Term]	Q7Z6Z7 1xPhospho [S]	2.25814e-10	0	1	1	2	Q7Z6Z7	Q7Z6Z7 [2904-2929]	0	2845.18	0	91.1	83.2	89.2	96.4	112.8	125		Not Found	Not Found	Not Found	Not Found	Not Found	Not Found	Not Found	Not Found	Not Found	Not Found	High	High	0	5.418e-11	5.83
FALSE	High	[K].MEEDGSTVLGLLESSAEK.[A]	1xTMT6plex [K18]; 1xTMT6plex [N-Term]		8.10024e-06	0	1	1	1	O75410	O75410 [563-580]	0	2353.22	0	91.1	95.3	106.1	96.7	104.4	117.7		Not Found	Not Found	Not Found	Not Found	Not Found	Not Found	Not Found	Not Found	Not Found	High	Not Found	High	0	8.996e-07	4.43
FALSE	High	[R].RYSDHAGPAIPSVVAYPK.[R]	1xPhospho [S/Y]; 1xTMT6plex [K18]; 1xTMT6plex [N-Term]	P27448 1xPhospho [Y/S]	9.84266e-09	0	1	1	4	P27448	P27448 [417-434]	1	2466.29	0	93.8	89.7	80	106.9	99.1	104.4		Not Found	Not Found	Not Found	Not Found	Not Found	Not Found	High	Not Found	Not Found	Not Found	Not Found	High	0	1.785e-09	5.66
FALSE	High	[R].RYSLGQVSK.[E]	1xPhospho [S3]; 1xTMT6plex [K9]; 1xTMT6plex [N-Term]	Q14D04 1xPhospho [S430]	0.00331554	0.000108793	1	1	2	Q14D04	Q14D04 [428-436]	1	1575.87	0	97.5	79.7	89.5	93.3	106.5	137.8		Not Found	Not Found	Not Found	Not Found	Not Found	Not Found	High	Not Found	Not Found	Not Found	Not Found	High	3.165e-05	0.0004154	3.53
FALSE	High	[K].MEEDGSTVLGLLESSAEK.[A]	1xOxidation [M1]; 1xTMT6plex [K18]; 1xTMT6plex [N-Term]		0.000717304	0	1	1	1	O75410	O75410 [563-580]	0	2369.22	0	101.7	93.3	98.2	87.4	104	147		Not Found	Not Found	Not Found	Not Found	Not Found	Not Found	Not Found	Not Found	Not Found	High	Not Found	High	0	5.349e-05	3.28
FALSE	High	[K].SAAATSPAPHLVAGPLLGTVGK.[A]	1xPhospho [T/S]; 1xTMT6plex [K22]; 1xTMT6plex [N-Term]	Q96RK0 1xPhospho [S/T]	1.39331e-06	0	1	1	2	Q96RK0	Q96RK0 [734-755]	0	2553.42	0	81.6	75.9	93	84.2	90.7	170.5		Not Found	Not Found	Not Found	Not Found	Not Found	Not Found	Not Found	High	Not Found	Not Found	Not Found	High	0	1.765e-07	4.29
FALSE	High	[R].SDADENVSASDK.[R]	1xTMT6plex [K12]; 1xTMT6plex [N-Term]		1.07321e-06	0	1	1	1	Q92878	Q92878 [1167-1178]	0	1695.84	0	103.8	96.5	104.3	88.1	102.3	110.1		Not Found	Not Found	Not Found	Not Found	Not Found	Not Found	Not Found	Not Found	Not Found	High	Not Found	High	0	1.387e-07	4.05
FALSE	High	[R].RYSPVAK.[D]	1xPhospho [S3]; 1xTMT6plex [K7]; 1xTMT6plex [N-Term]	P78352 1xPhospho [S295]	0.20447	0.00868388	1	1	3	P78352	P78352 [293-299]	1	1358.76	0	104.7	93.1	89.4	105.2	103.3	122.6		Not Found	Not Found	Not Found	Not Found	Not Found	High	High	Not Found	Not Found	Not Found	Not Found	High	0.004869	0.07502	2.16
FALSE	High	[K].SDIDEIVLVGGSTR.[I]	1xTMT6plex [N-Term]		1.44036e-05	0	1	1	1	P11021	P11021 [354-367]	0	1689.92	0	97.8	94.2	96.5	82.1	109.6	136.7		Not Found	Not Found	Not Found	Not Found	Not Found	Not Found	Not Found	Not Found	Not Found	High	Not Found	High	0	1.531e-06	3.64
FALSE	High	[R].RYSPSPPPK.[R]	2xPhospho [S5; S/Y]; 1xTMT6plex [K9]; 1xTMT6plex [N-Term]	Q8IYB3 2xPhospho [S607; S/Y]	0.00336014	0.000108793	1	1	20	Q8IYB3	Q8IYB3 [603-611]	1	1646.81	0	91.8	99.1	98.5	95.2	101.3	108.6		Not Found	High	High	High	High	Not Found	High	Not Found	Not Found	Not Found	Not Found	High	6.142e-05	0.0005268	3.82
FALSE	High	[K].SDAEEDGGTVSQEEEDRKPK.[A]	1xPhospho [T/S]; 2xTMT6plex [K18; K20]; 1xTMT6plex [N-Term]	P27824 1xPhospho [S/T]	3.26141e-08	0	1	1	16	P27824	P27824 [554-573]	1	2973.43	0	122.8	120.8	115	121.3	93.7	52.2		High	High	High	Not Found	Not Found	Not Found	High	High	Not Found	Not Found	High	High	0	1.087e-08	5.91
FALSE	High	[R].RYSPSPPPK.[R]	1xPhospho [S/Y]; 1xTMT6plex [K9]; 1xTMT6plex [N-Term]	Q8IYB3 1xPhospho [S/Y]	0.00773891	0.000108793	1	1	4	Q8IYB3	Q8IYB3 [603-611]	1	1566.84	0	97.2	90.3	106	89.8	110.8	120.5		Not Found	Not Found	Not Found	Not Found	Not Found	High	Not Found	Not Found	Not Found	Not Found	Not Found	High	3.165e-05	0.0004513	3.2
FALSE	High	[K].SDAEEDGGTVSQEEEDRKPK.[A]	2xPhospho [S1; S11]; 2xTMT6plex [K18; K20]; 1xTMT6plex [N-Term]	P27824 2xPhospho [S554; S564]	0.0124973	0.000209539	1	1	1	P27824	P27824 [554-573]	1	3053.4	0	112.5	96.2	108.3	92.2	111.7	98.2		Not Found	Not Found	High	Not Found	Not Found	Not Found	Not Found	Not Found	Not Found	Not Found	Not Found	High	0.0001195	0.0007803	3.55
FALSE	High	[K].SAAQAAAQTNSNAAGK.[Q]	1xTMT6plex [K16]; 1xTMT6plex [N-Term]		3.04878e-06	0	1	1	1	Q8NC51	Q8NC51 [53-68]	0	1919.03	0	96.6	104.8	86.9	103.2	103.8	107.3		Not Found	Not Found	Not Found	Not Found	Not Found	Not Found	High	Not Found	Not Found	Not Found	Not Found	High	0	3.64e-07	3.3
FALSE	High	[R].RWSAEVTSSTYSDEDRPPK.[V]	1xPhospho [S/Y/T]; 1xTMT6plex [K19]; 1xTMT6plex [N-Term]	Q9UJM3 1xPhospho [S/T/Y]	0.000140183	0	1	1	9	Q9UJM3	Q9UJM3 [300-318]	1	2749.32	0	93.7	95.1	89.2	101.8	101.7	116.5		Not Found	Not Found	Not Found	Not Found	High	High	Not Found	Not Found	Not Found	Not Found	Not Found	High	0	1.245e-05	4.65
FALSE	High	[R].RWSLASLPSSGYGTNTPSSTLSSSSSSR.[E]	1xPhospho [S3]; 1xTMT6plex [N-Term]	O60307 1xPhospho [S85]	0.000443129	0	1	1	1	O60307	O60307 [83-110]	1	3169.5	0	69.8	90.2	105.3	122.3	100.1	87		Not Found	Not Found	Not Found	Not Found	Not Found	Not Found	Not Found	High	Not Found	Not Found	Not Found	High	0	3.505e-05	3.72
FALSE	High	[R].RYSPPIQR.[R]	1xPhospho [Y/S]; 1xTMT6plex [N-Term]	Q8IYB3 1xPhospho [S/Y]	0.0126645	0.000209539	1	1	20	Q8IYB3	Q8IYB3 [595-602]	1	1325.69	0	96.6	85.6	101.1	90.4	102.3	129.6		Not Found	Not Found	Not Found	High	High	High	High	High	High	Not Found	Not Found	High	0.0006286	0.009535	3.08
FALSE	High	[K].MEENFQSAIDTSASFSSLLGR.[A]	1xPhospho [S/T]; 1xTMT6plex [N-Term]	Q8TE12 1xPhospho [T/S]	0.135646	0.0044861	1	1	7	Q8TE12	Q8TE12 [7-27]	0	2599.19	0	72.9	93.3	92.7	103.5	110.4	122.7		Not Found	Not Found	Not Found	Not Found	Not Found	Not Found	Not Found	Not Found	Not Found	High	Not Found	High	0.001675	0.02761	3.34
FALSE	High	[K].SDDEVDDPAVELK.[Q]	1xTMT6plex [K13]; 1xTMT6plex [N-Term]		1.00398e-07	0	1	1	1	P12111	P12111 [1348-1360]	0	1889.97	0	103.8	98.1	106.6	96.5	107.4	81.2		Not Found	Not Found	Not Found	Not Found	Not Found	Not Found	Not Found	Not Found	Not Found	High	Not Found	High	0	1.54e-08	4.12
FALSE	High	[R].SDDMIETVYNDR.[G]	1xTMT6plex [N-Term]		0.00501612	0.000108793	1	1	1	O15013	O15013 [644-655]	0	1686.78	0	83.3	112.2	94.7	100.5	106.9	115.1		Not Found	Not Found	Not Found	Not Found	Not Found	Not Found	Not Found	Not Found	Not Found	High	Not Found	High	3.165e-05	0.0002869	2.66
FALSE	High	[R].SDDTLDEEDSFVMK.[A]	1xPhospho [S1]; 1xTMT6plex [K14]; 1xTMT6plex [N-Term]	P53355 1xPhospho [S333]	0.000417234	0	1	1	2	P53355	P53355 [333-346]	0	2168.97	0	103.8	99.9	106.9	87.2	86.6	90.9		Not Found	High	Not Found	Not Found	Not Found	Not Found	Not Found	Not Found	Not Found	Not Found	High	High	0	3.704e-05	3.27
FALSE	High	[K].MEEFKDQLPADECNK.[L]	1xCarbamidomethyl [C13]; 2xTMT6plex [K5; K15]; 1xTMT6plex [N-Term]		9.07861e-07	0	1	1	1	P38646	P38646 [596-610]	1	2541.29	0	112.6	104.8	113	117.5	101.3	56.4		Not Found	Not Found	Not Found	Not Found	Not Found	Not Found	Not Found	Not Found	Not Found	High	Not Found	High	0	1.183e-07	4.51
FALSE	High	[R].SDKSPDLAPTPAPQSTPR.[N]	1xPhospho [S]; 1xTMT6plex [K3]; 1xTMT6plex [N-Term]	Q9BY44 1xPhospho [S]	3.37158e-07	0	1	1	18	Q9BY44	Q9BY44 [503-520]	1	2403.23	0	99.6	116.7	100	122.1	89.9	67		Not Found	Not Found	Not Found	High	High	High	High	High	Not Found	Not Found	Not Found	High	0	1.011e-07	5.59
FALSE	High	[R].SDATADDLIDVVEGNR.[V]	1xTMT6plex [N-Term]		1.45075e-07	0	1	1	2	Q9Y295	Q9Y295 [223-238]	0	1918.96	0	100.8	102.7	98.9	82.8	106.1	123.2		Not Found	Not Found	Not Found	Not Found	Not Found	Not Found	Not Found	Not Found	Not Found	High	Not Found	High	0	7.116e-08	4.31
FALSE	High	[K].RWSWGGSAMANSESK.[T]	1xPhospho [S3]; 1xTMT6plex [K15]; 1xTMT6plex [N-Term]	Q8IWC1 1xPhospho [S165]	0.00100886	0	1	1	2	Q8IWC1	Q8IWC1 [163-177]	1	2192.04	0	96.4	97	109.7	98.5	111.4	83.9		Not Found	Not Found	Not Found	Not Found	Not Found	Not Found	Not Found	High	Not Found	Not Found	Not Found	High	3.165e-05	8.663e-05	3.35
FALSE	High	[R].SCQKSPAQQEPPQR.[Q]	1xCarbamidomethyl [C2]; 1xPhospho [S5]; 1xTMT6plex [K4]; 1xTMT6plex [N-Term]	P51825 1xPhospho [S588]	0.00314299	0.000108793	1	1	1	P51825	P51825 [584-597]	1	2179.07	0	91.2	89	106	130.9	115.9	75.8		Not Found	Not Found	Not Found	Not Found	High	Not Found	Not Found	Not Found	Not Found	Not Found	Not Found	High	3.165e-05	0.0001826	3.45
FALSE	High	[R].SAGGSSPEGGEDSDREDGNYCPPVK.[R]	1xCarbamidomethyl [C21]; 1xPhospho [S13]; 1xTMT6plex [K25]; 1xTMT6plex [N-Term]	Q9H6Z4 1xPhospho [S108]	4.61905e-08	0	1	1	2	Q9H6Z4	Q9H6Z4 [96-120]	1	3105.35	0	107.6	103.7	110	92.6	96.1	83.5		Not Found	Not Found	High	Not Found	Not Found	Not Found	Not Found	Not Found	Not Found	Not Found	High	High	0	7.495e-09	4.44
FALSE	High	[R].SASPHDVDLCLVSPCEFEHR.[K]	2xCarbamidomethyl [C10; C15]; 1xPhospho [S]; 1xTMT6plex [N-Term]	Q66K74 1xPhospho [S]	3.30455e-07	0	1	1	4	Q66K74	Q66K74 [729-748]	0	2664.18	0	97.1	106.6	98.8	110.1	99	98.4		Not Found	Not Found	Not Found	High	High	Not Found	Not Found	Not Found	Not Found	Not Found	Not Found	High	0	4.637e-08	5.68
FALSE	High	[K].SASPEVSEGHENQHGQESEAK.[A]	1xPhospho [S]; 1xTMT6plex [K21]; 1xTMT6plex [N-Term]	O60930 1xPhospho [S]	0.000143026	0	1	1	2	O60930	O60930 [74-94]	0	2775.26	0	97.2	87.6	91.2	83.7	95.7	95		Not Found	Not Found	Not Found	Not Found	Not Found	Not Found	Not Found	Not Found	Not Found	Not Found	High	High	0	2.276e-05	3.66
FALSE	High	[K].SATTTPSGSPR.[T]	1xPhospho [S]; 1xTMT6plex [N-Term]	Q2M2I8 1xPhospho [S]	0.00213311	0.000108793	1	1	10	Q2M2I8	Q2M2I8 [670-680]	0	1370.65	0	98.8	93.4	101	112.4	104.1	101.4		High	High	High	High	Not Found	High	High	High	High	Not Found	High	High	3.165e-05	0.0001705	3.58
FALSE	High	[R].SASPDYNR.[T]	1xPhospho [S3]; 1xTMT6plex [N-Term]	Q14669 1xPhospho [S77]	0.0158712	0.000295797	1	1	2	Q14669	Q14669 [75-82]	0	1218.54	0	100	79.3	104.8	82.7	93	144.4		High	Not Found	Not Found	Not Found	Not Found	Not Found	Not Found	Not Found	Not Found	Not Found	High	High	0.0009331	0.01425	3.04
FALSE	High	[K].SATTTPSGSPR.[T]	2xPhospho [T/S]; 1xTMT6plex [N-Term]	Q2M2I8 2xPhospho [T/S]	0.0174146	0.000295797	1	1	6	Q2M2I8	Q2M2I8 [670-680]	0	1450.62	0	87.8	79.4	89	100.4	93.5	149.6		High	Not Found	Not Found	Not Found	Not Found	Not Found	Not Found	Not Found	Not Found	Not Found	High	High	0.0004603	0.007706	3.14
FALSE	High	[R].SASPDGGPR.[S]	1xPhospho [S3]; 1xTMT6plex [N-Term]	O75420 1xPhospho [S230]	0.106939	0.00303607	1	1	1	O75420	O75420 [228-236]	0	1152.52	0	99.2	87.5	91.7	102.2	85.8	127.1		Not Found	Not Found	Not Found	Not Found	Not Found	Not Found	Not Found	Not Found	Not Found	Not Found	High	High	0.001084	0.01872	2.86
FALSE	High	[R].SAVAVYSYSCEGPEEESEDDSHLEGR.[D]	1xCarbamidomethyl [C10]; 1xPhospho [S/Y]; 1xTMT6plex [N-Term]	Q9C0B1 1xPhospho [S/Y]	3.09138e-08	0	1	1	14	Q9C0B1	Q9C0B1 [240-265]	0	3211.32	0	106.2	120.5	90.7	92.3	95	86.7		High	High	High	Not Found	Not Found	Not Found	Not Found	Not Found	Not Found	Not Found	High	High	0	5.167e-09	5.19
FALSE	High	[R].SASPDDDLGSSNWEAADLGNEER.[K]	1xPhospho [S]; 1xTMT6plex [N-Term]	O00193 1xPhospho [S]	1.33084e-10	0	1	1	16	O00193	O00193 [15-37]	0	2744.15	0	91.1	89.2	94.9	94	111.6	122		High	High	High	Not Found	Not Found	Not Found	Not Found	Not Found	Not Found	Not Found	High	High	0	3.31e-11	7.64
FALSE	High	[R].SASPDDDLGSSNWEAADLGNEER.[K]	1xTMT6plex [N-Term]		8.90687e-11	0	1	1	1	O00193	O00193 [15-37]	0	2664.19	0	90.5	106.9	87.8	90.8	98.8	131.5		Not Found	Not Found	Not Found	Not Found	Not Found	Not Found	Not Found	Not Found	Not Found	High	Not Found	High	0	2.285e-11	5.99
FALSE	High	[K].SASLVTR.[Q]	1xPhospho [S3]; 1xTMT6plex [N-Term]	Q9H2K8 1xPhospho [S442]	0.193119	0.00779766	1	1	3	Q9H2K8	Q9H2K8 [440-446]	0	1042.55	0	114.7	96	92	87.9	109.1	95.3		Not Found	Not Found	Not Found	High	Not Found	Not Found	Not Found	Not Found	Not Found	Not Found	Not Found	High	0.003098	0.0462	2.41
FALSE	High	[R].SASITNLSLDR.[S]	1xPhospho [S3]; 1xTMT6plex [N-Term]	Q9Y2I7 1xPhospho [S307]	0.000516839	0	1	1	3	Q9Y2I7	Q9Y2I7 [305-315]	0	1485.75	0	92.6	102	88.9	105.1	100	108		Not Found	Not Found	Not Found	High	High	Not Found	Not Found	Not Found	Not Found	Not Found	Not Found	High	0	4.03e-05	3.96
FALSE	High	[R].SASLSYPDR.[T]	1xPhospho [S3]; 1xTMT6plex [N-Term]	Q6P4Q7 1xPhospho [S664]	0.078278	0.00219213	1	1	2	Q6P4Q7	Q6P4Q7 [662-670]	0	1304.61	0	118.9	92.5	109.5	88.3	117.7	117.9		Not Found	High	High	Not Found	Not Found	Not Found	Not Found	Not Found	Not Found	Not Found	Not Found	High	0.000771	0.01124	2.43
FALSE	High	[K].SASLPAYR.[R]	1xPhospho [S3]; 1xTMT6plex [N-Term]	O94929 1xPhospho [S585]	0.181246	0.00697215	1	1	2	O94929	O94929 [583-590]	0	1173.59	0	93.2	90.5	88.8	89.4	113.7	119.9		Not Found	Not Found	Not Found	High	Not Found	Not Found	Not Found	Not Found	Not Found	Not Found	Not Found	High	0.002794	0.04255	2.29
FALSE	High	[K].SAVESGQADDER.[V]	1xTMT6plex [N-Term]		3.15408e-08	0	1	1	1	P78318	P78318 [177-188]	0	1492.71	0	90.2	83.1	95.3	92.3	100.6	130.3		Not Found	Not Found	Not Found	Not Found	Not Found	Not Found	Not Found	Not Found	Not Found	High	Not Found	High	0	5.271e-09	4.17
FALSE	High	[K].MFLYADNEDR.[A]	1xTMT6plex [N-Term]		1.36526e-05	0	1	1	1	Q9NP79	Q9NP79 [97-106]	0	1502.71	0	97.1	85.4	90.2	95	114.3	135.5		Not Found	Not Found	Not Found	Not Found	Not Found	Not Found	Not Found	Not Found	Not Found	High	Not Found	High	0	1.46e-06	3.48
FALSE	High	[K].SASFAFEFPK.[D]	1xPhospho [S3]; 1xTMT6plex [K10]; 1xTMT6plex [N-Term]	Q86YV5 1xPhospho [S696]	0.000615021	0	1	1	2	Q86YV5	Q86YV5 [694-703]	0	1668.84	0	93.7	97.6	87.1	115.4	119.6	106		Not Found	Not Found	Not Found	Not Found	Not Found	Not Found	High	High	Not Found	Not Found	Not Found	High	0	4.67e-05	3.5
FALSE	High	[R].MFTEDQGVDDR.[L]	1xTMT6plex [N-Term]		1.07294e-05	0	1	1	1	P23497	P23497 [37-47]	0	1541.71	0	98.8	79.6	94.2	81.4	114.6	141.2		Not Found	Not Found	Not Found	Not Found	Not Found	Not Found	Not Found	Not Found	Not Found	High	Not Found	High	0	1.171e-06	3.44
FALSE	High	[K].MFVSSSGLPPSPVPSPR.[R]	1xPhospho [S11]; 1xTMT6plex [N-Term]	Q7Z309 1xPhospho [S137]	6.0355e-07	0	1	1	5	Q7Z309	Q7Z309 [127-143]	0	2051.02	0	95.7	92.4	98	109.3	98.7	109.2		Not Found	Not Found	Not Found	Not Found	Not Found	Not Found	Not Found	High	Not Found	Not Found	Not Found	High	0	4.702e-07	4.75
FALSE	High	[R].METVSNASSSSNPSSPGR.[I]	1xPhospho [S15]; 1xTMT6plex [N-Term]	Q9NTI5 1xPhospho [S1166]	1.00349e-05	0	1	1	2	Q9NTI5	Q9NTI5 [1152-1169]	0	2103.92	0	108.8	103.4	104.9	106.9	105.9	84		Not Found	Not Found	Not Found	High	High	Not Found	Not Found	Not Found	Not Found	Not Found	Not Found	High	0	1.1e-06	4.75
FALSE	High	[R].SASAGPAGESKPK.[S]	1xPhospho [S3]; 2xTMT6plex [K11; K13]; 1xTMT6plex [N-Term]	Q8N5U6 1xPhospho [S41]	0.0240763	0.000295797	1	1	1	Q8N5U6	Q8N5U6 [39-51]	0	1954.06	0	99.2	102.8	117.8	97.7	102.8	88.8		Not Found	Not Found	Not Found	Not Found	Not Found	High	Not Found	Not Found	Not Found	Not Found	Not Found	High	0.0001658	0.001792	2.71
FALSE	High	[R].SASADNLTLPR.[W]	1xPhospho [S]; 1xTMT6plex [N-Term]	Q8ND76 1xPhospho [S]	2.64833e-05	0	1	1	18	Q8ND76	Q8ND76 [324-334]	0	1453.72	0	106.9	93.3	101.1	99.9	112.1	120		High	High	High	High	Not Found	Not Found	High	High	High	Not Found	High	High	0	1.005e-05	4.42
FALSE	High	[R].SASPHDVDLCLVSPCEFEHR.[K]	2xCarbamidomethyl [C10; C15]; 2xPhospho [S3; S13]; 1xTMT6plex [N-Term]	Q66K74 2xPhospho [S731; S741]	0.000112405	0	1	1	1	Q66K74	Q66K74 [729-748]	0	2744.14	0	99.5	88	92.8	88.3	104	144.1		Not Found	Not Found	High	Not Found	Not Found	Not Found	Not Found	Not Found	Not Found	Not Found	Not Found	High	0	1.022e-05	5.33
FALSE	High	[R].RVSHSPPPK.[Q]	2xPhospho [S3; S5]; 1xTMT6plex [K9]; 1xTMT6plex [N-Term]	Q8IYB3 2xPhospho [S636; S638]	0.061484	0.00139911	1	1	2	Q8IYB3	Q8IYB3 [634-642]	1	1622.82	0	106.1	87.6	100.6	94.9	85.6	143.7		Not Found	Not Found	Not Found	High	High	Not Found	Not Found	Not Found	Not Found	Not Found	Not Found	High	0.0009961	0.017	3.11
FALSE	High	[R].MFGGPGTASRPSSSR.[S]	1xPhospho [S/T]; 1xTMT6plex [N-Term]	P08670 1xPhospho [S]	0.000406216	0	1	1	14	P08670	P08670 [14-28]	0	1803.84	0	100.5	83.5	93.3	98	116.4	108.7		Not Found	Not Found	Not Found	Not Found	Not Found	Not Found	High	High	Not Found	Not Found	Not Found	High	0	3.256e-05	3.98
FALSE	High	[K].SASPQPAFHLKPDTPVSVK.[K]	1xPhospho [S/T]; 2xTMT6plex [K11; K19]; 1xTMT6plex [N-Term]	Q9HC56 1xPhospho [S/T]	1.29441e-06	0	1	1	5	Q9HC56	Q9HC56 [941-959]	0	2773.53	0	105.4	103	105.4	92.1	93.8	71.8		Not Found	Not Found	Not Found	Not Found	Not Found	Not Found	High	High	Not Found	Not Found	Not Found	High	0	1.646e-07	5.22
FALSE	High	[R].MEVDRSPGLPMSDLK.[T]	1xPhospho [S6]; 1xOxidation [M]; 1xTMT6plex [K15]; 1xTMT6plex [N-Term]	Q6WCQ1 1xPhospho [S619]	0.0248829	0.000295797	1	1	3	Q6WCQ1	Q6WCQ1 [614-628]	1	2229.11	0	103	96.7	105.7	93.2	101.6	86.7		Not Found	Not Found	Not Found	Not Found	High	High	Not Found	Not Found	Not Found	Not Found	Not Found	High	0.0003628	0.005983	2.78
FALSE	High	[R].MEVGPFSTGQESPTAENAR.[L]	1xPhospho [S/T]; 1xTMT6plex [N-Term]	Q9Y4W2 1xPhospho [S/T]	7.73332e-08	0	1	1	3	Q9Y4W2	Q9Y4W2 [606-624]	0	2317.04	0	99.6	88.9	100.6	84.1	103.1	108		Not Found	Not Found	Not Found	Not Found	High	Not Found	Not Found	Not Found	Not Found	Not Found	Not Found	High	0	1.211e-08	5.52
FALSE	High	[R].SASWGSADQLK.[E]	1xPhospho [S]; 1xTMT6plex [K11]; 1xTMT6plex [N-Term]	Q86VQ1 1xPhospho [S]	0.00381483	0.000108793	1	1	2	Q86VQ1	Q86VQ1 [221-231]	0	1687.85	0	98.2	105.3	106.3	94.1	104.2	74.7		Not Found	Not Found	Not Found	Not Found	Not Found	High	Not Found	Not Found	Not Found	Not Found	Not Found	High	3.165e-05	0.0002183	3.25
FALSE	High	[R].SASVNKEPVSLPGIMR.[R]	1xPhospho [S]; 1xTMT6plex [K6]; 1xTMT6plex [N-Term]	Q8WWI1 1xPhospho [S]	7.08541e-06	0	1	1	7	Q8WWI1	Q8WWI1 [1491-1506]	1	2223.2	0	114	111.7	110.2	111.7	106.3	74.6		Not Found	Not Found	Not Found	Not Found	Not Found	Not Found	High	High	High	Not Found	Not Found	High	0	7.964e-07	5.35
FALSE	High	[K].SASTDLGTADVVLGR.[V]	1xPhospho [S/T]; 1xTMT6plex [N-Term]	Q9Y2K5 1xPhospho [S/T]	5.06888e-05	0	1	1	7	Q9Y2K5	Q9Y2K5 [853-867]	0	1770.88	0	97.4	94.9	90.7	112.7	94.5	102.4		Not Found	High	High	High	Not Found	Not Found	Not Found	Not Found	Not Found	Not Found	Not Found	High	0	4.909e-06	3.81
FALSE	High	[K].SASSYSDIEEIATPDSSAPSSPK.[L]	1xPhospho [S]; 1xTMT6plex [K23]; 1xTMT6plex [N-Term]	Q8NEY1 1xPhospho [S]	1.09578e-09	0	1	1	6	Q8NEY1	Q8NEY1 [1233-1255]	0	2864.35	0	87.1	107	99.9	115.4	93.8	79.4		Not Found	High	High	High	Not Found	Not Found	Not Found	Not Found	Not Found	Not Found	Not Found	High	0	1.468e-09	5.47
FALSE	High	[R].SASSSWLEGTSTQAK.[E]	1xPhospho [S]; 1xTMT6plex [K15]; 1xTMT6plex [N-Term]	Q9BZL4 1xPhospho [S]	1.21904e-07	0	1	1	6	Q9BZL4	Q9BZL4 [450-464]	0	2078.02	0	101.1	90.3	98.1	97.7	113.4	99.2		Not Found	Not Found	Not Found	Not Found	Not Found	High	Not Found	Not Found	Not Found	Not Found	Not Found	High	0	1.848e-08	4.81
FALSE	High	[R].SATLETKPESK.[Y]	1xPhospho [T3]; 2xTMT6plex [K7; K11]; 1xTMT6plex [N-Term]	P15260 1xPhospho [T295]	0.0274652	0.000295797	1	1	1	P15260	P15260 [293-303]	0	1958.08	0	123.3	117.1	119.5	119.6	95	59.2		Not Found	Not Found	Not Found	Not Found	Not Found	High	Not Found	Not Found	Not Found	Not Found	Not Found	High	0.0001658	0.002173	2.37
FALSE	High	[K].SATLSSTESTASEMQEEMK.[G]	1xPhospho [T/S]; 1xTMT6plex [K19]; 1xTMT6plex [N-Term]	Q02952 1xPhospho [T/S]	3.85448e-07	0	1	1	8	Q02952	Q02952 [640-658]	0	2585.18	0	92.1	90.5	94.8	105.4	88.1	93.6		High	High	High	Not Found	Not Found	Not Found	Not Found	Not Found	Not Found	Not Found	Not Found	High	0	5.347e-08	4.61
FALSE	High	[R].METVSNASSSSNPSSPGR.[I]	1xPhospho [S]; 1xOxidation [M1]; 1xTMT6plex [N-Term]	Q9NTI5 1xPhospho [S]	0.110283	0.00303607	1	1	2	Q9NTI5	Q9NTI5 [1152-1169]	0	2119.92	0	87.7	100.8	106.5	105.5	101.7	102.3		Not Found	Not Found	Not Found	Not Found	High	Not Found	Not Found	Not Found	Not Found	Not Found	Not Found	High	0.001084	0.01953	2.59
FALSE	High	[R].SASSGAEGDVSSER.[E]	1xPhospho [S4]; 1xTMT6plex [N-Term]	Q8TEA8 1xPhospho [S197]	0.000101669	0	1	1	2	Q8TEA8	Q8TEA8 [194-207]	0	1647.71	0	92.7	96.2	89.6	91.4	94.2	138.7		High	Not Found	Not Found	Not Found	Not Found	Not Found	Not Found	Not Found	Not Found	Not Found	High	High	0	9.31e-06	3.88
FALSE	High	[R].SATPVNCEQPDILVSSTPINEGQTVLDK.[V]	1xCarbamidomethyl [C7]; 1xPhospho [T/S]; 1xTMT6plex [K28]; 1xTMT6plex [N-Term]	P82094 1xPhospho [T/S]	2.16926e-10	0	1	1	4	P82094	P82094 [399-426]	0	3550.78	0	106.7	91.6	114.8	87.9	92.9	75.3		Not Found	Not Found	Not Found	Not Found	High	Not Found	Not Found	Not Found	Not Found	Not Found	Not Found	High	0	5.219e-11	6.6
FALSE	High	[R].SASSGAEGDVSSER.[E]	1xTMT6plex [N-Term]		2.15426e-09	0	1	1	1	Q8TEA8	Q8TEA8 [194-207]	0	1567.74	0	85.9	83	87.1	80.4	99.4	169.6		Not Found	Not Found	Not Found	Not Found	Not Found	Not Found	Not Found	Not Found	Not Found	High	Not Found	High	0	4.373e-10	4.39
FALSE	High	[R].SASSDTSEELNSQDSPPK.[Q]	1xPhospho [S/T]; 1xTMT6plex [K18]; 1xTMT6plex [N-Term]	O14745 1xPhospho [S/T]	1.70354e-07	0	1	1	38	O14745	O14745 [288-305]	0	2417.11	0	100.9	109.1	100.5	94.4	101.2	86.5		High	High	High	High	Not Found	Not Found	Not Found	Not Found	Not Found	Not Found	High	High	0	2.507e-08	5.16
FALSE	High	[R].SASQSSLDKLDQELK.[E]	2xPhospho [S5; S]; 2xTMT6plex [K9; K15]; 1xTMT6plex [N-Term]	O60271 2xPhospho [S732; S]	0.0174146	0.000295797	1	1	2	O60271	O60271 [728-742]	1	2496.26	0	94.4	135.7	91.5	137.8	74.3	39.8		Not Found	Not Found	Not Found	Not Found	High	Not Found	Not Found	Not Found	Not Found	Not Found	Not Found	High	0.004222	0.05882	3.24
FALSE	High	[R].SASQSSLDKLDQELK.[E]	1xPhospho [S]; 2xTMT6plex [K9; K15]; 1xTMT6plex [N-Term]	O60271 1xPhospho [S]	1.70269e-05	0	1	1	13	O60271	O60271 [728-742]	1	2416.29	0	101.8	124.9	100.3	123.8	80	56.7		Not Found	Not Found	Not Found	Not Found	High	High	Not Found	High	Not Found	Not Found	Not Found	High	0	4.534e-06	5.38
FALSE	High	[K].SATRPSPSPER.[S]	1xPhospho [S8]; 1xTMT6plex [N-Term]	Q9UQ35 1xPhospho [S353]	0.0986764	0.00260894	1	1	3	Q9UQ35	Q9UQ35 [346-356]	0	1493.73	0	101.7	85.1	109.5	85.1	107	111.9		Not Found	High	High	Not Found	Not Found	Not Found	Not Found	Not Found	Not Found	Not Found	High	High	0.001872	0.03081	2.79
FALSE	High	[K].SATRPSPSPER.[S]	2xPhospho [S6; S8]; 1xTMT6plex [N-Term]	Q9UQ35 2xPhospho [S351; S353]	0.068527	0.00175403	1	1	3	Q9UQ35	Q9UQ35 [346-356]	0	1573.7	0	102.9	93.3	103.9	92	109.7	109		High	Not Found	Not Found	Not Found	Not Found	Not Found	Not Found	Not Found	Not Found	Not Found	High	High	0.0009733	0.01628	2.67
FALSE	High	[K].SATRPSPSPERSSTGPEPPAPTPLLAER.[H]	3xPhospho [S/T]; 1xTMT6plex [N-Term]	Q9UQ35 3xPhospho [S/T]	0.000143986	0	1	1	7	Q9UQ35	Q9UQ35 [346-373]	1	3354.54	0	90.2	94.6	103.5	86.4	99.8	131		Not Found	Not Found	High	Not Found	Not Found	Not Found	Not Found	Not Found	Not Found	Not Found	High	High	0	1.277e-05	4.44
FALSE	High	[R].SASPSTAVK.[V]	1xPhospho [S3]; 1xTMT6plex [K9]; 1xTMT6plex [N-Term]	Q8TC71 1xPhospho [S276]	0.0283829	0.000295797	1	1	2	Q8TC71	Q8TC71 [274-282]	0	1385.74	0	105.2	107	101.2	109.6	92.3	89.7		Not Found	Not Found	Not Found	Not Found	High	Not Found	Not Found	Not Found	Not Found	Not Found	Not Found	High	0.0001658	0.002261	2.53
FALSE	High	[R].SATTTGSPGTEK.[A]	1xPhospho [S7]; 1xTMT6plex [K12]; 1xTMT6plex [N-Term]	Q6GYQ0 1xPhospho [S740]	0.000193284	0	1	1	1	Q6GYQ0	Q6GYQ0 [734-745]	0	1674.84	0	113.9	102.3	103.7	108.8	78.2	81.1		Not Found	Not Found	Not Found	High	Not Found	Not Found	Not Found	Not Found	Not Found	Not Found	Not Found	High	0	1.672e-05	4.26
FALSE	High	[R].SASPPPATSSSSSSR.[R]	2xPhospho [S1; S3]; 1xTMT6plex [N-Term]	Q9H7N4 2xPhospho [S612; S614]	3.90441e-05	0	1	1	1	Q9H7N4	Q9H7N4 [612-626]	0	1794.75	0	101.3	82.4	85	89.3	97.8	153.6		Not Found	Not Found	Not Found	Not Found	Not Found	Not Found	Not Found	Not Found	Not Found	Not Found	High	High	0	3.862e-06	3.45
FALSE	High	[R].SAQGSSSPVPSMVQKSPR.[I]	1xPhospho [S]; 1xTMT6plex [K15]; 1xTMT6plex [N-Term]	P35658 1xPhospho [S]	0.000949933	0	1	1	2	P35658	P35658 [651-668]	1	2368.21	0	86.6	89.4	98.6	130.2	100.6	101.8		Not Found	Not Found	Not Found	Not Found	Not Found	Not Found	High	Not Found	Not Found	Not Found	Not Found	High	0	6.743e-05	2.99
FALSE	High	[R].SAQGSSSPVPSMVQK.[S]	1xPhospho [S]; 1xOxidation [M12]; 1xTMT6plex [K15]; 1xTMT6plex [N-Term]	P35658 1xPhospho [S]	0.175034	0.00689042	1	1	2	P35658	P35658 [651-665]	0	2044.02	0	112.3	87.4	121.7	99.7	108.1	77.9		Not Found	Not Found	Not Found	Not Found	Not Found	High	Not Found	Not Found	Not Found	Not Found	Not Found	High	0.002669	0.04035	2.44
FALSE	High	[R].SAQGSSSPVPSMVQK.[S]	1xPhospho [S]; 1xTMT6plex [K15]; 1xTMT6plex [N-Term]	P35658 1xPhospho [S]	0.00112278	0.000108793	1	1	2	P35658	P35658 [651-665]	0	2028.02	0	101.5	100.5	101.6	101.1	98.8	83.8		Not Found	Not Found	Not Found	Not Found	Not Found	High	Not Found	Not Found	Not Found	Not Found	Not Found	High	3.165e-05	0.0001103	3.23
FALSE	High	[R].SCHDLDLLGQSPGWGQTQAVETNIVCK.[L]	2xCarbamidomethyl [C2; C26]; 1xPhospho [S1]; 1xTMT6plex [K27]; 1xTMT6plex [N-Term]	Q9P0V3 1xPhospho [S296]	7.18444e-08	0	1	1	2	Q9P0V3	Q9P0V3 [296-322]	0	3551.71	0	97.2	92.8	93.9	88.8	104.8	108.6		Not Found	Not Found	Not Found	Not Found	Not Found	High	High	Not Found	Not Found	Not Found	Not Found	High	0	1.128e-08	7.16
FALSE	High	[R].MGAQQDDGSDAPPGSPDWAGDVTR.[G]	1xPhospho [S15]; 1xTMT6plex [N-Term]	Q96PE2 1xPhospho [S619]	4.58936e-09	0	1	1	3	Q96PE2	Q96PE2 [605-628]	0	2739.16	0	100.4	78.1	99	86.1	112.8	122.1		Not Found	High	High	Not Found	Not Found	Not Found	Not Found	Not Found	Not Found	Not Found	Not Found	High	0	8.824e-10	6.09
FALSE	High	[K].SALSPSKSPAK.[L]	1xPhospho [S]; 2xTMT6plex [K7; K11]; 1xTMT6plex [N-Term]	P49792 1xPhospho [S]	0.0668043	0.00175403	1	2	3	P49792	P49792 [2273-2283]	1	1840.05	0	107.7	98.8	113.2	116.2	91.3	55.7		Not Found	Not Found	Not Found	Not Found	Not Found	Not Found	High	High	Not Found	Not Found	Not Found	High	0.001152	0.02038	2.47
FALSE	High	[R].MGAQQDDGSDAPPGSPDWAGDVTR.[G]	1xPhospho [S]; 1xOxidation [M1]; 1xTMT6plex [N-Term]	Q96PE2 1xPhospho [S]	4.2912e-08	0	1	1	6	Q96PE2	Q96PE2 [605-628]	0	2755.15	0	97.6	113.1	92.2	98.4	93.7	88.2		High	High	High	Not Found	Not Found	Not Found	Not Found	Not Found	Not Found	Not Found	High	High	0	7.004e-09	4.88
FALSE	High	[R].SCLLEEEEESGEEAAEAME.[-]	1xCarbamidomethyl [C2]; 1xPhospho [S10]; 1xTMT6plex [N-Term]	Q969H6 1xPhospho [S154]	0.0487733	0.000948301	1	1	1	Q969H6	Q969H6 [145-163]	0	2450.97	0	98.5	138.7	93.7	106.8	73.3	56.9		Not Found	Not Found	High	Not Found	Not Found	Not Found	Not Found	Not Found	Not Found	Not Found	Not Found	High	0.0003407	0.005228	3.24
FALSE	High	[R].MGDEGGESELLGEDLPLEPSVTK.[A]	1xTMT6plex [K23]; 1xTMT6plex [N-Term]		0.000538006	0	1	1	1	O60271	O60271 [1283-1305]	0	2860.45	0	86	92	84.7	105.4	109.1	115.6		Not Found	Not Found	Not Found	Not Found	Not Found	Not Found	Not Found	Not Found	Not Found	High	Not Found	High	0	4.171e-05	4
FALSE	High	[K].SALALR.[W]	1xPhospho [S1]; 1xTMT6plex [N-Term]	Q9Y2D5 1xPhospho [S839]	0.0487733	0.000948301	1	1	6	Q9Y2D5	Q9Y2D5 [839-844]	0	939.523	0	100.6	94.4	80.2	75.9	99.1	96.2		Not Found	Not Found	Not Found	Not Found	High	High	Not Found	Not Found	High	Not Found	Not Found	High	0.003632	0.05211	2.95
FALSE	High	[K].MGNLQNSPVNMNPPPLSK.[M]	1xPhospho [S7]; 1xTMT6plex [K18]; 1xTMT6plex [N-Term]	Q15596 1xPhospho [S565]	1.77246e-05	0	1	1	2	Q15596	Q15596 [559-576]	0	2476.25	0	106.3	107	104.1	85.1	110.6	104.7		Not Found	Not Found	Not Found	Not Found	Not Found	Not Found	Not Found	High	Not Found	Not Found	Not Found	High	0	2.946e-06	4.14
FALSE	High	[R].SCMLTGTPESVQSAK.[R]	1xCarbamidomethyl [C2]; 1xPhospho [T7]; 1xTMT6plex [K15]; 1xTMT6plex [N-Term]	Q96AE4 1xPhospho [T153]	2.794e-05	0	1	1	1	Q96AE4	Q96AE4 [147-161]	0	2134.03	0	95.4	111	107.3	103	95.7	103.6		Not Found	Not Found	Not Found	Not Found	Not Found	High	Not Found	Not Found	Not Found	Not Found	Not Found	High	0	2.823e-06	3.59
FALSE	High	[K].MESEGGADDSAEEGDLLDDDDNEDR.[G]	1xPhospho [S10]; 1xTMT6plex [N-Term]	P07910 1xPhospho [S260]	4.41088e-11	0	1	1	3	P07910	P07910 [251-275]	0	3008.13	0	99.1	120.9	91.6	98.4	87.1	99.1		Not Found	Not Found	High	Not Found	Not Found	Not Found	Not Found	Not Found	Not Found	Not Found	High	High	0	1.191e-11	6.45
FALSE	High	[R].SCPSFSASSEGTR.[I]	1xCarbamidomethyl [C2]; 1xPhospho [S4]; 1xTMT6plex [N-Term]	P27707 1xPhospho [S11]	0.0019687	0.000108793	1	1	1	P27707	P27707 [8-20]	0	1681.71	0	100	93.9	91.9	93.9	78.4	102.2		Not Found	Not Found	Not Found	High	Not Found	Not Found	Not Found	Not Found	Not Found	Not Found	Not Found	High	3.165e-05	0.0001219	3.36
FALSE	High	[R].SAKPETVIDSLLQ.[-]	1xPhospho [S1]; 1xTMT6plex [K3]; 1xTMT6plex [N-Term]	Q9Y496 1xPhospho [S687]	0.0748915	0.00210549	1	1	1	Q9Y496	Q9Y496 [687-699]	0	1939.06	0	83.7	91.9	93.6	103.5	103	87.6		Not Found	Not Found	Not Found	Not Found	Not Found	High	Not Found	Not Found	Not Found	Not Found	Not Found	High	0.0007236	0.01047	3.96
FALSE	High	[K].MGNLQNSPVNMNPPPLSK.[M]	1xPhospho [S7]; 1xOxidation [M]; 1xTMT6plex [K18]; 1xTMT6plex [N-Term]	Q15596 1xPhospho [S565]	1.09498e-06	0	1	1	2	Q15596	Q15596 [559-576]	0	2492.24	0	105.9	103.6	107.7	105.6	107.7	78.3		Not Found	Not Found	Not Found	Not Found	Not Found	Not Found	High	Not Found	Not Found	Not Found	Not Found	High	0	1.411e-07	4.07
FALSE	High	[K].SAHTVEHGSPR.[T]	1xPhospho [S/T]; 1xTMT6plex [N-Term]	Q96GP6 1xPhospho [S/T]	0.000205282	0	1	1	6	Q96GP6	Q96GP6 [710-720]	0	1486.7	0	106	74.6	87.1	70.9	109	174.8		High	High	High	Not Found	High	Not Found	Not Found	Not Found	Not Found	Not Found	High	High	0	1.769e-05	3.89
FALSE	High	[R].MEVDRSPGLPMSDLK.[T]	1xPhospho [S6]; 1xTMT6plex [K15]; 1xTMT6plex [N-Term]	Q6WCQ1 1xPhospho [S619]	3.02844e-06	0	1	1	3	Q6WCQ1	Q6WCQ1 [614-628]	1	2213.11	0	100.7	88.5	107.7	94.9	101.1	72.9		Not Found	Not Found	Not Found	Not Found	Not Found	High	High	Not Found	Not Found	Not Found	Not Found	High	0	3.62e-07	5.32
FALSE	High	[K].SAGTATQMR.[Q]	1xPhospho [S1]; 1xTMT6plex [N-Term]	Q92934 1xPhospho [S134]	0.000912572	0	1	1	2	Q92934	Q92934 [134-142]	0	1231.57	0	90.6	93.5	91.9	95.8	103.2	137		Not Found	High	High	Not Found	Not Found	Not Found	Not Found	Not Found	Not Found	Not Found	Not Found	High	0	6.536e-05	3.26
FALSE	High	[R].SCSEEKIPEDGSLNTTK.[-]	1xCarbamidomethyl [C2]; 1xPhospho [S]; 2xTMT6plex [K6; K17]; 1xTMT6plex [N-Term]	P37173 1xPhospho [S]	0.00866717	0.000108793	1	1	4	P37173	P37173 [551-567]	1	2662.32	0	103.5	117.1	108.6	126.2	91.2	57.8		Not Found	Not Found	Not Found	High	High	Not Found	Not Found	Not Found	Not Found	Not Found	Not Found	High	3.165e-05	0.0005127	4.5
FALSE	High	[K].SAGSIPLSPLAHTPSPPPPTASPQR.[S]	1xPhospho [S1]; 1xTMT6plex [N-Term]	Q6P0Q8 1xPhospho [S1337]	6.11357e-05	0	1	1	1	Q6P0Q8	Q6P0Q8 [1337-1361]	0	2772.43	0	87.9	99.6	97.3	109.6	107.4	102.3		Not Found	Not Found	Not Found	Not Found	Not Found	Not Found	High	Not Found	Not Found	Not Found	Not Found	High	0	5.836e-06	4.71
FALSE	High	[R].SAGQGEVLVYVEDPAGHQEEAK.[V]	1xTMT6plex [K22]; 1xTMT6plex [N-Term]		8.55837e-12	0	1	1	2	P21333	P21333 [310-331]	0	2771.43	0	96.7	110.6	106.9	93.9	104.2	83		Not Found	Not Found	Not Found	Not Found	Not Found	Not Found	Not Found	Not Found	Not Found	High	Not Found	High	0	2.603e-12	6.43
FALSE	High	[K].MENQSENNDIDEVIIPTAPLYK.[Q]	1xTMT6plex [K22]; 1xTMT6plex [N-Term]		7.84137e-10	0	1	1	1	Q99816	Q99816 [305-326]	0	2991.54	0	89.1	91.7	98.6	94.2	104.1	118.3		Not Found	Not Found	Not Found	Not Found	Not Found	Not Found	Not Found	Not Found	Not Found	High	Not Found	High	0	1.716e-10	6.06
FALSE	High	[K].SAGNIPLSPLAR.[T]	1xPhospho [S1]; 1xTMT6plex [N-Term]	O15021 1xPhospho [S1370]	0.182299	0.00705008	1	1	1	O15021	O15021 [1370-1381]	0	1504.81	0	90.6	85.8	94.7	96.4	101.9	105.2		Not Found	Not Found	Not Found	Not Found	Not Found	High	Not Found	Not Found	Not Found	Not Found	Not Found	High	0.002794	0.0427	2.79
FALSE	High	[K].MESEGGADDSAEEGDLLDDDDNEDR.[G]	1xPhospho [S10]; 1xOxidation [M1]; 1xTMT6plex [N-Term]	P07910 1xPhospho [S260]	8.84529e-10	0	1	1	1	P07910	P07910 [251-275]	0	3024.13	0	96.9	107.1	100.2	89.9	110.6	91.4		Not Found	Not Found	Not Found	Not Found	Not Found	Not Found	Not Found	Not Found	Not Found	Not Found	High	High	0	1.916e-10	5.47
FALSE	High	[R].SCGHQTSASSLK.[A]	1xCarbamidomethyl [C2]; 1xPhospho [S10]; 1xTMT6plex [K12]; 1xTMT6plex [N-Term]	Q9HB90 1xPhospho [S385]	0.038607	0.00057911	1	1	1	Q9HB90	Q9HB90 [376-387]	0	1800.87	0	110.5	94.4	92	123.3	83.2	96.2		Not Found	Not Found	Not Found	Not Found	High	Not Found	Not Found	Not Found	Not Found	Not Found	Not Found	High	0.0002417	0.003632	2.56
FALSE	High	[R].SALSSSLRDLSEAGK.[R]	1xPhospho [S]; 1xTMT6plex [K15]; 1xTMT6plex [N-Term]	Q6DN90 1xPhospho [S]	0.0116936	0.000209539	1	1	2	Q6DN90	Q6DN90 [920-934]	1	2059.08	0	94.5	92	100.2	118.9	98.6	84.8		Not Found	Not Found	Not Found	Not Found	Not Found	High	Not Found	Not Found	Not Found	Not Found	Not Found	High	9.162e-05	0.0007225	2.16
FALSE	High	[R].SCFESSPDPELK.[S]	1xCarbamidomethyl [C2]; 2xPhospho [S1; S5]; 1xTMT6plex [K12]; 1xTMT6plex [N-Term]	Q9UQ35 2xPhospho [S871; S875]	0.0383562	0.00057911	1	1	2	Q9UQ35	Q9UQ35 [871-882]	0	2013.87	0	91.3	104.4	99.3	79.1	103.7	118.4		Not Found	Not Found	Not Found	Not Found	Not Found	Not Found	Not Found	Not Found	Not Found	Not Found	High	High	0.0002417	0.003582	2.81
FALSE	High	[K].SAPTSPTATNISSK.[T]	1xPhospho [T/S]; 1xTMT6plex [K14]; 1xTMT6plex [N-Term]	Q9H792 1xPhospho [S/T]	8.77498e-05	0	1	1	4	Q9H792	Q9H792 [568-581]	0	1899.98	0	105.5	90.9	111.8	97.4	102.6	88.9		Not Found	Not Found	Not Found	Not Found	High	High	Not Found	Not Found	Not Found	Not Found	Not Found	High	3.165e-05	0.0001305	3.08
FALSE	High	[K].SAPSSPTLDCEK.[M]	1xCarbamidomethyl [C10]; 2xPhospho [S1; S4]; 1xTMT6plex [K12]; 1xTMT6plex [N-Term]	Q9GZM8 2xPhospho [S194; S197]	0.000467492	0	1	1	2	Q9GZM8	Q9GZM8 [194-205]	0	1909.84	0	100.9	97.9	95.9	101.4	99.4	104.2		Not Found	Not Found	High	Not Found	Not Found	Not Found	Not Found	Not Found	Not Found	Not Found	High	High	0	6.278e-05	3.53
FALSE	High	[R].SAPSSPAPR.[R]	1xPhospho [S]; 1xTMT6plex [N-Term]	O75064 1xPhospho [S]	0.0572985	0.00130733	1	1	4	O75064	O75064 [732-740]	0	1178.58	0	99.8	84	95.1	88.7	96.2	129.7		High	Not Found	Not Found	Not Found	Not Found	Not Found	Not Found	Not Found	Not Found	Not Found	High	High	0.0004359	0.006776	2.58
FALSE	High	[K].SAYQEYDSDSDVPEELKR.[D]	1xPhospho [S8]; 1xTMT6plex [K17]; 1xTMT6plex [N-Term]	Q96JG6 1xPhospho [S559]	2.70275e-06	0	1	1	1	Q96JG6	Q96JG6 [552-569]	1	2669.24	0	100.2	124.4	86	119.5	92.2	77.1		Not Found	Not Found	High	Not Found	Not Found	Not Found	Not Found	Not Found	Not Found	Not Found	Not Found	High	0	3.251e-07	5.07
FALSE	High	[K].METEADAPSPAPSLGER.[L]	1xPhospho [S9]; 1xOxidation [M1]; 1xTMT6plex [N-Term]	Q12873 1xPhospho [S1601]	0.041744	0.000856746	1	1	1	Q12873	Q12873 [1593-1609]	0	2082.93	0	117.7	81.5	105.1	75.5	105.2	113.7		High	Not Found	Not Found	Not Found	Not Found	Not Found	Not Found	Not Found	Not Found	Not Found	Not Found	High	0.0003161	0.004091	2.13
FALSE	High	[R].SAPSSAPSTPLSTDAPEFLSVPK.[D]	1xPhospho [S]; 1xTMT6plex [K23]; 1xTMT6plex [N-Term]	Q9UKF7 1xPhospho [S]	0.036644	0.000484649	1	1	2	Q9UKF7	Q9UKF7 [270-292]	0	2824.44	0	96.6	87.8	100.7	88.3	96.6	117		Not Found	Not Found	Not Found	Not Found	Not Found	High	Not Found	Not Found	Not Found	Not Found	Not Found	High	0.000216	0.003341	3.02
FALSE	High	[K].METEADAPSPAPSLGER.[L]	1xPhospho [T/S]; 1xTMT6plex [N-Term]	Q12873 1xPhospho [S/T]	5.56677e-05	0	1	1	5	Q12873	Q12873 [1593-1609]	0	2066.93	0	93.2	93.6	90.6	88.2	98.3	129.5		High	High	High	Not Found	Not Found	Not Found	Not Found	Not Found	Not Found	Not Found	High	High	0	7.125e-05	3.17
FALSE	High	[K].MESSFGSPSKQESSESLPK.[E]	1xPhospho [S7]; 2xTMT6plex [K10; K19]; 1xTMT6plex [N-Term]	Q6VMQ6 1xPhospho [S477]	0.0378592	0.00057911	1	1	1	Q6VMQ6	Q6VMQ6 [471-489]	1	2809.39	0	91.5	100.2	108.1	124.4	99	74.6		Not Found	Not Found	Not Found	Not Found	Not Found	High	Not Found	Not Found	Not Found	Not Found	Not Found	High	0.0002417	0.003517	3.47
FALSE	High	[R].SAPPNLWAAQR.[Y]	1xPhospho [S1]; 1xTMT6plex [N-Term]	Q92934 1xPhospho [S99]	0.000121804	0	1	1	7	Q92934	Q92934 [99-109]	0	1519.76	0	112.9	97.6	93.6	101	101.3	94.6		Not Found	Not Found	Not Found	Not Found	Not Found	High	High	Not Found	Not Found	Not Found	Not Found	High	0	1.599e-05	3.38
FALSE	High	[R].SAPASPTHPGLMSPR.[S]	2xPhospho [S1; S5]; 1xOxidation [M12]; 1xTMT6plex [N-Term]	P85037 2xPhospho [S416; S420]	0.0176468	0.000295797	1	1	2	P85037	P85037 [416-430]	0	1910.84	0	93	79.1	100.8	80.7	109	142.2		Not Found	Not Found	High	Not Found	Not Found	Not Found	Not Found	Not Found	Not Found	Not Found	High	High	0.000144	0.001189	4.08
FALSE	High	[R].SCSFSSESR.[A]	1xCarbamidomethyl [C2]; 1xPhospho [S3]; 1xTMT6plex [N-Term]	Q5VZ89 1xPhospho [S1046]	0.00136302	0.000108793	1	1	2	Q5VZ89	Q5VZ89 [1044-1052]	0	1355.55	0	99	88.7	89.4	86.7	100.3	129.5		Not Found	High	High	Not Found	Not Found	Not Found	Not Found	Not Found	Not Found	Not Found	Not Found	High	3.165e-05	9.026e-05	3.08
FALSE	High	[R].SCDELSPVSPTQGGYPSEPTR.[S]	1xCarbamidomethyl [C2]; 1xPhospho [S9]; 1xTMT6plex [N-Term]	Q9HCD6 1xPhospho [S1827]	2.5631e-08	0	1	1	4	Q9HCD6	Q9HCD6 [1819-1839]	0	2573.14	0	91.7	101.8	93.6	96.3	87.1	111.1		High	High	High	Not Found	Not Found	Not Found	Not Found	Not Found	Not Found	Not Found	High	High	0	1.336e-08	5.12
FALSE	High	[R].SAPASPTHPGLMSPR.[S]	1xPhospho [S5]; 1xOxidation [M12]; 1xTMT6plex [N-Term]	P85037 1xPhospho [S420]	0.000283037	0	1	1	1	P85037	P85037 [416-430]	0	1830.88	0	89.8	85	108.3	91	101.5	124.9		Not Found	Not Found	Not Found	Not Found	High	Not Found	Not Found	Not Found	Not Found	Not Found	Not Found	High	0	2.356e-05	3.04
FALSE	High	[K].MESSFGSPSK.[Q]	1xPhospho [S7]; 1xTMT6plex [K10]; 1xTMT6plex [N-Term]	Q6VMQ6 1xPhospho [S477]	0.0313195	0.000389981	1	1	1	Q6VMQ6	Q6VMQ6 [471-480]	0	1594.76	0	96.9	109.8	101.3	99.5	104.9	95		Not Found	Not Found	Not Found	Not Found	Not Found	High	Not Found	Not Found	Not Found	Not Found	Not Found	High	0.0001904	0.002619	2.63
FALSE	High	[R].SAPASPTHPGLMSPR.[S]	1xPhospho [S5]; 1xTMT6plex [N-Term]	P85037 1xPhospho [S420]	0.0422903	0.000856746	1	1	1	P85037	P85037 [416-430]	0	1814.88	0	89.9	99.1	111.7	104.3	102.9	73		Not Found	Not Found	Not Found	Not Found	High	Not Found	Not Found	Not Found	Not Found	Not Found	Not Found	High	0.0003161	0.004156	2.39
FALSE	High	[R].SAPAMQSSGSFNYARPK.[Q]	1xPhospho [Y/S]; 1xTMT6plex [K17]; 1xTMT6plex [N-Term]	Q8WX93 1xPhospho [S/Y]	0.0133558	0.000209539	1	1	7	Q8WX93	Q8WX93 [719-735]	0	2337.15	0	92.1	100	95.9	126.9	86.9	87		Not Found	Not Found	Not Found	Not Found	Not Found	Not Found	High	Not Found	Not Found	Not Found	Not Found	High	0.0001195	0.0008431	2.74
FALSE	High	[R].SANPTRPSSPVTSHISK.[V]	1xPhospho [S]; 1xTMT6plex [K17]; 1xTMT6plex [N-Term]	Q92560 1xPhospho [S]	0.00121658	0.000108793	1	1	4	Q92560	Q92560 [513-529]	0	2304.21	0	96.3	84.7	98.8	89.2	112.9	88.5		Not Found	Not Found	Not Found	Not Found	Not Found	High	High	Not Found	Not Found	Not Found	Not Found	High	3.165e-05	8.26e-05	3.34
FALSE	High	[R].SAMDSPVPASMFAPEPSSPGAAR.[A]	1xPhospho [S]; 1xOxidation [M]; 1xTMT6plex [N-Term]	O00178 1xPhospho [S]	6.28124e-06	0	1	1	6	O00178	O00178 [8-30]	0	2585.16	0	109.2	97.8	100.8	90.7	92.6	103.1		Not Found	Not Found	Not Found	Not Found	High	Not Found	Not Found	Not Found	Not Found	Not Found	Not Found	High	0	7.13e-07	4.87
FALSE	High	[R].SAMDSPVPASMFAPEPSSPGAAR.[A]	1xPhospho [S]; 1xTMT6plex [N-Term]	O00178 1xPhospho [S]	3.50886e-06	0	1	1	2	O00178	O00178 [8-30]	0	2569.17	0	90.6	102.7	89.8	101.4	90.7	118.6		Not Found	Not Found	Not Found	Not Found	Not Found	High	Not Found	Not Found	Not Found	Not Found	Not Found	High	0	1.3e-06	4.38
FALSE	High	[R].SCFESSPDPELK.[S]	1xCarbamidomethyl [C2]; 1xPhospho [S]; 1xTMT6plex [K12]; 1xTMT6plex [N-Term]	Q9UQ35 1xPhospho [S]	0.000606848	0	1	1	38	Q9UQ35	Q9UQ35 [871-882]	0	1933.9	0	109	106	106.8	103	100.1	72		High	High	High	High	High	Not Found	Not Found	Not Found	High	Not Found	High	High	0.0001904	0.0028	3.48
FALSE	High	[K].SALTVQFVQGIFVEK.[Y]	1xTMT6plex [K15]; 1xTMT6plex [N-Term]		7.27766e-06	0	1	3	1	A6NIZ1	A6NIZ1 [17-31]	0	2124.25	0	99.3	58.5	103.1	92.9	101.3	121.8		High	Not Found	Not Found	Not Found	Not Found	Not Found	Not Found	Not Found	Not Found	Not Found	Not Found	High	0	8.127e-07	3.63
FALSE	High	[R].MESMNRPYTSLVPPLSPQPK.[I]	1xPhospho [S16]; 1xTMT6plex [K20]; 1xTMT6plex [N-Term]	Q70E73 1xPhospho [S610]	0.000107981	0	1	1	1	Q70E73	Q70E73 [595-614]	0	2810.44	0	83.1	91	94	115.3	90.9	71.5		Not Found	Not Found	Not Found	Not Found	Not Found	Not Found	Not Found	High	Not Found	Not Found	Not Found	High	0	9.845e-06	4.84
FALSE	High	[R].SAPASPTHPGLMSPR.[S]	2xPhospho [S1; S5]; 1xTMT6plex [N-Term]	P85037 2xPhospho [S416; S420]	5.10433e-06	0	1	1	2	P85037	P85037 [416-430]	0	1894.85	0	99.3	88.3	103.8	98.4	104.6	107.5		Not Found	High	High	Not Found	Not Found	Not Found	Not Found	Not Found	Not Found	Not Found	Not Found	High	0	5.886e-07	4.65
FALSE	High	[R].SATDGNTSTTPPTSAK.[K]	1xPhospho [T10]; 1xTMT6plex [K16]; 1xTMT6plex [N-Term]	Q13620 1xPhospho [T49]	1.40231e-05	0	1	1	1	Q13620	Q13620 [40-55]	0	2074.01	0	100.8	91.5	111.3	91.7	96.4	86.4		Not Found	Not Found	Not Found	High	Not Found	Not Found	Not Found	Not Found	Not Found	Not Found	Not Found	High	0	1.492e-06	4.8
FALSE	High	[R].NSATCHSEDSDLEID.[-]	1xCarbamidomethyl [C5]; 1xPhospho [S]; 1xTMT6plex [N-Term]	Q13371 1xPhospho [S]	0.116542	0.00328961	1	1	2	Q13371	Q13371 [287-301]	0	2001.79	0	98.7	83.7	90.7	80.1	119.3	152.3		Not Found	Not Found	Not Found	Not Found	Not Found	Not Found	Not Found	Not Found	Not Found	Not Found	High	High	0.001221	0.02144	1.75
FALSE	High	[R].RVSFGVDEEER.[V]	1xPhospho [S3]; 1xTMT6plex [N-Term]	Q9BRQ6 1xPhospho [S13]	0.00525605	0.000108793	1	1	3	Q9BRQ6	Q9BRQ6 [11-21]	1	1631.76	0	94.9	91.2	95.1	95.2	103.4	118.6		High	High	Not Found	Not Found	Not Found	Not Found	Not Found	Not Found	Not Found	Not Found	High	High	3.165e-05	0.0003006	2.63
FALSE	High	[R].RPSASSPNNNTAAK.[G]	1xPhospho [S]; 1xTMT6plex [K14]; 1xTMT6plex [N-Term]	O75151 1xPhospho [S]	0.00536235	0.000108793	1	1	2	O75151	O75151 [1054-1067]	0	1953	0	109.9	77.2	117.7	84	86.8	112.7		Not Found	Not Found	Not Found	Not Found	Not Found	High	Not Found	Not Found	Not Found	Not Found	Not Found	High	3.165e-05	0.0003068	2.58
FALSE	High	[K].MQAHIQDLEEQLDEEEGAR.[Q]	1xOxidation [M1]; 1xTMT6plex [N-Term]		0.00655065	0.000108793	1	1	1	P35580	P35580 [948-966]	0	2486.17	0	95.3	97.6	101.5	78.1	107.5	123.7		Not Found	Not Found	Not Found	Not Found	Not Found	Not Found	Not Found	Not Found	Not Found	High	Not Found	High	3.165e-05	0.000379	3.04
FALSE	High	[R].RPSALPPK.[E]	1xPhospho [S3]; 1xTMT6plex [K8]; 1xTMT6plex [N-Term]	Q8N4B1 1xPhospho [S179]	0.00700243	0.000108793	1	1	2	Q8N4B1	Q8N4B1 [177-184]	0	1403.82	0	92.5	93.2	74.6	93	109.6	103		Not Found	Not Found	Not Found	Not Found	Not Found	Not Found	High	Not Found	Not Found	Not Found	Not Found	High	3.165e-05	0.000406	2.97
FALSE	High	[R].RPSADSESPGTPSPDGAAWEPPAR.[E]	1xPhospho [S3]; 1xTMT6plex [N-Term]	Q96PE2 1xPhospho [S142]	7.78525e-08	0	1	1	7	Q96PE2	Q96PE2 [140-163]	0	2744.25	0	102	87.8	93.7	97.4	106.6	109.8		Not Found	High	High	Not Found	High	High	Not Found	Not Found	Not Found	Not Found	Not Found	High	0	1.405e-08	6.02
FALSE	High	[R].MQDLDEDATLTQLATAWVSLATGGEK.[L]	1xTMT6plex [K26]; 1xTMT6plex [N-Term]		5.38641e-07	0	1	1	1	O14579	O14579 [172-197]	0	3222.66	0	99.6	91.8	65.7	104.2	92.1	129.6		Not Found	Not Found	Not Found	Not Found	Not Found	Not Found	Not Found	Not Found	Not Found	High	Not Found	High	0	7.311e-08	4.67
FALSE	High	[R].RPRPPNAPSQDGK.[E]	1xPhospho [S9]; 1xTMT6plex [K13]; 1xTMT6plex [N-Term]	P16989 1xPhospho [S346]	0.0134448	0.000209539	1	1	1	P16989	P16989 [338-350]	0	1958.04	0	96.7	99.7	99.5	85.9	90.4	116		Not Found	Not Found	Not Found	Not Found	Not Found	High	Not Found	Not Found	Not Found	Not Found	Not Found	High	0.0001195	0.0008549	3.3
FALSE	High	[K].RPQSPSPR.[R]	1xPhospho [S4]; 1xTMT6plex [N-Term]	Q99590 1xPhospho [S816]	0.0082173	0.000108793	1	1	5	Q99590	Q99590 [813-820]	0	1233.63	0	73.6	58.3	70.5	59.8	84.1	297.5		Not Found	High	High	Not Found	High	High	High	Not Found	Not Found	Not Found	Not Found	High	6.142e-05	0.0006822	2.74
FALSE	High	[R].RPQSPGASPSQAER.[L]	2xPhospho [S4; S8]; 1xTMT6plex [N-Term]	Q96T58 2xPhospho [S736; S740]	0.000317135	0	1	1	2	Q96T58	Q96T58 [733-746]	0	1856.83	0	92.6	79.1	90.3	87.7	110	153.9		High	Not Found	Not Found	Not Found	Not Found	Not Found	Not Found	Not Found	Not Found	Not Found	High	High	0	2.609e-05	4.46
FALSE	High	[K].RPPTPCSDPER.[K]	1xCarbamidomethyl [C6]; 2xPhospho [T4; S7]; 1xTMT6plex [N-Term]	Q9BW71 2xPhospho [T84; S87]	0.049408	0.000948301	1	1	1	Q9BW71	Q9BW71 [81-91]	0	1700.71	0	71.9	61.1	89.3	76.3	101.8	205.4		Not Found	Not Found	Not Found	Not Found	Not Found	Not Found	Not Found	Not Found	Not Found	Not Found	High	High	0.0003407	0.00533	2.65
FALSE	High	[K].RPPTPCSDPER.[K]	1xCarbamidomethyl [C6]; 1xPhospho [T4]; 1xTMT6plex [N-Term]	Q9BW71 1xPhospho [T84]	0.127691	0.00406112	1	1	2	Q9BW71	Q9BW71 [81-91]	0	1620.74	0	95.3	90	96.9	86.5	103.7	155.4		Not Found	High	High	Not Found	Not Found	Not Found	Not Found	Not Found	Not Found	Not Found	Not Found	High	0.001541	0.02497	2.96
FALSE	High	[R].MQEAMTQEVSDVFSDTTTPIK.[L]	1xPhospho [S/T]; 1xTMT6plex [K21]; 1xTMT6plex [N-Term]	P18206 1xPhospho [T/S]	0.000422855	0	1	1	5	P18206	P18206 [587-607]	0	2896.38	0	78	86.6	91.1	102.5	99.8	127.6		Not Found	Not Found	Not Found	Not Found	High	High	Not Found	Not Found	Not Found	Not Found	Not Found	High	0	5.235e-05	3.74
FALSE	High	[R].RPPSPEPSTK.[V]	1xPhospho [S4]; 1xTMT6plex [K10]; 1xTMT6plex [N-Term]	Q01082 1xPhospho [S2102]	0.0103053	0.000209539	1	1	47	Q01082	Q01082 [2099-2108]	0	1633.87	0	101.5	89.7	101.1	92.9	106	117.2		Not Found	Not Found	Not Found	High	High	High	High	High	High	Not Found	Not Found	High	0.001675	0.0273	3.2
FALSE	High	[R].MQFSFEGPEK.[V]	1xPhospho [S4]; 1xTMT6plex [K10]; 1xTMT6plex [N-Term]	Q6DN90 1xPhospho [S180]	0.0396264	0.000674753	1	1	1	Q6DN90	Q6DN90 [177-186]	0	1737.83	0	105.2	105.7	99.4	117.6	94	86.2		Not Found	Not Found	Not Found	Not Found	Not Found	High	Not Found	Not Found	Not Found	Not Found	Not Found	High	0.0002679	0.003782	2.76
FALSE	High	[R].RPPSPEPSTK.[V]	1xTMT6plex [K10]; 1xTMT6plex [N-Term]		0.164117	0.00589781	1	1	1	Q01082	Q01082 [2099-2108]	0	1553.91	0	92.3	94	99.1	102.3	98.4	96.2		Not Found	Not Found	Not Found	Not Found	High	Not Found	Not Found	Not Found	Not Found	Not Found	Not Found	High	0.002314	0.03696	2.2
FALSE	High	[R].RPPSPDVIVLSDNEQPSSPR.[V]	2xPhospho [S]; 1xTMT6plex [N-Term]	Q86YP4 2xPhospho [S]	3.70277e-07	0	1	1	6	Q86YP4	Q86YP4 [97-116]	0	2579.21	0	93.5	93.5	92.4	83.1	106.2	150.2		High	High	High	Not Found	Not Found	Not Found	Not Found	Not Found	Not Found	Not Found	High	High	0	5.165e-08	5.57
FALSE	High	[R].RPPGPTTSPASTSLSSPGQR.[D]	1xPhospho [T/S]; 1xTMT6plex [N-Term]	Q01970 1xPhospho [T/S]	0.0768095	0.00210549	1	1	3	Q01970	Q01970 [919-938]	0	2290.14	0	92.8	88.6	76	115.6	106.7	121.2		Not Found	Not Found	Not Found	Not Found	Not Found	High	Not Found	Not Found	Not Found	Not Found	Not Found	High	0.0007236	0.01093	2.23
FALSE	High	[K].RPPESPPIVEEWNSR.[A]	1xPhospho [S5]; 1xTMT6plex [N-Term]	Q9BTL3 1xPhospho [S36]	0.000190714	0	1	1	1	Q9BTL3	Q9BTL3 [32-46]	0	2102.03	0	96.3	81.3	95	79	103.4	172.5		Not Found	Not Found	Not Found	High	Not Found	Not Found	Not Found	Not Found	Not Found	Not Found	Not Found	High	0	1.647e-05	3.78
FALSE	High	[K].RPPEPTTPWQEDPEPEDENLYEK.[N]	1xTMT6plex [K23]; 1xTMT6plex [N-Term]		2.42828e-06	0	1	1	1	Q9NX14	Q9NX14 [47-69]	0	3254.59	0	109.8	94.8	92.8	94.9	114.8	115		Not Found	Not Found	Not Found	Not Found	Not Found	Not Found	Not Found	Not Found	Not Found	High	Not Found	High	0	2.954e-07	6.23
FALSE	High	[K].MQMLEDEDDLAYAETEK.[K]	1xTMT6plex [K17]; 1xTMT6plex [N-Term]		1.21875e-06	0	1	1	1	Q14204	Q14204 [4346-4362]	0	2489.18	0	102.9	107	101.3	97.4	101.4	86.6		Not Found	Not Found	Not Found	Not Found	Not Found	Not Found	Not Found	Not Found	Not Found	High	Not Found	High	0	1.557e-07	4.84
FALSE	High	[R].RPPEEDFRHSPEEDFR.[Q]	1xPhospho [S10]; 1xTMT6plex [N-Term]	Q8IXT5 1xPhospho [S710]	0.0409374	0.000768703	1	1	2	Q8IXT5	Q8IXT5 [701-716]	1	2352.06	0	99.7	92.8	94.5	85.1	100.1	118.3		High	Not Found	Not Found	Not Found	Not Found	Not Found	Not Found	Not Found	Not Found	Not Found	High	High	0.0003161	0.004497	2.77
FALSE	High	[K].RPNEDSDEDEEK.[G]	1xPhospho [S6]; 1xTMT6plex [K12]; 1xTMT6plex [N-Term]	Q12996 1xPhospho [S691]	0.0364056	0.000484649	1	1	1	Q12996	Q12996 [686-697]	0	2000.89	0	92.7	89.8	82.8	73.2	104.7	153.2		Not Found	Not Found	Not Found	Not Found	Not Found	Not Found	Not Found	Not Found	Not Found	Not Found	High	High	0.000216	0.003313	2.75
FALSE	High	[R].MQNDTAENETTEK.[E]	1xTMT6plex [K13]; 1xTMT6plex [N-Term]		0.00013557	0	1	1	1	Q05682	Q05682 [137-149]	0	1968.96	0	86.7	97.9	99.8	106.2	94.9	90		Not Found	Not Found	Not Found	Not Found	Not Found	Not Found	Not Found	Not Found	Not Found	High	Not Found	High	0	1.21e-05	3.29
FALSE	High	[K].RPLSSSHEASEGQAK.[D]	1xPhospho [S]; 1xTMT6plex [K15]; 1xTMT6plex [N-Term]	Q8IZ21 1xPhospho [S]	2.42765e-05	0	1	1	5	Q8IZ21	Q8IZ21 [173-187]	0	2122.07	0	110.3	99.3	93.3	105.5	101.6	87.2		Not Found	Not Found	Not Found	Not Found	High	Not Found	Not Found	High	Not Found	Not Found	Not Found	High	0	2.662e-06	4.81
FALSE	High	[K].MQQNIQELEEQLEEEESAR.[Q]	1xTMT6plex [N-Term]		2.31941e-10	0	1	1	5	P35579	P35579 [941-959]	0	2562.22	0	98.6	96.8	92.3	96.9	106.9	125.5		Not Found	High	High	Not Found	Not Found	Not Found	Not Found	Not Found	Not Found	High	Not Found	High	0	5.545e-11	6.53
FALSE	High	[K].MQQNIQELEEQLEEEESAR.[Q]	1xOxidation [M1]; 1xTMT6plex [N-Term]		1.42296e-10	0	1	1	2	P35579	P35579 [941-959]	0	2578.21	0	100.5	97.8	90.6	89.2	102.3	107.8		Not Found	Not Found	Not Found	Not Found	Not Found	Not Found	Not Found	Not Found	Not Found	High	Not Found	High	0	3.54e-11	6.54
FALSE	High	[R].MQQQLDEYQELLDIK.[L]	1xTMT6plex [K15]; 1xTMT6plex [N-Term]		2.38001e-06	0	1	1	2	P02545	P02545 [352-366]	0	2352.25	0	94.8	99.8	95.8	102.5	102.8	94.9		Not Found	Not Found	Not Found	Not Found	Not Found	Not Found	Not Found	Not Found	Not Found	High	Not Found	High	0	3.427e-07	4.88
FALSE	High	[R].MQQQLDEYQELLDIK.[L]	1xOxidation [M1]; 1xTMT6plex [K15]; 1xTMT6plex [N-Term]		6.32342e-06	0	1	1	3	P02545	P02545 [352-366]	0	2368.25	0	104.3	102.6	103.9	92.9	103.3	97.6		Not Found	Not Found	Not Found	Not Found	Not Found	Not Found	Not Found	Not Found	Not Found	High	Not Found	High	0	7.162e-07	4.67
FALSE	High	[K].MQAHIQDLEEQLDEEEGAR.[Q]	1xTMT6plex [N-Term]		6.53861e-06	0	1	1	1	P35580	P35580 [948-966]	0	2470.17	0	96.6	95.7	102.3	84.7	109.2	124.9		Not Found	Not Found	Not Found	Not Found	Not Found	Not Found	Not Found	Not Found	Not Found	High	Not Found	High	0	7.374e-07	4.46
FALSE	High	[R].RPSDENTIAPSEVQK.[W]	1xPhospho [S/T]; 1xTMT6plex [K15]; 1xTMT6plex [N-Term]	Q86W92 1xPhospho [S/T]	3.30286e-05	0	1	1	4	Q86W92	Q86W92 [792-806]	0	2209.13	0	104.3	105.6	101.8	96.4	94.7	84.7		Not Found	Not Found	Not Found	High	High	Not Found	Not Found	High	Not Found	Not Found	Not Found	High	0	3.295e-06	4.74
FALSE	High	[R].RPSDSGPPAER.[S]	1xPhospho [S3]; 1xTMT6plex [N-Term]	Q9BST9 1xPhospho [S106]	2.59569e-05	0	1	1	4	Q9BST9	Q9BST9 [104-114]	0	1477.7	0	86	81.3	78.6	83.8	99.7	180.7		High	High	High	Not Found	Not Found	Not Found	Not Found	Not Found	Not Found	Not Found	High	High	0	2.649e-06	4.38
FALSE	High	[R].RPSEGNEPSTK.[E]	1xPhospho [S3]; 1xTMT6plex [K11]; 1xTMT6plex [N-Term]	Q96Q45 1xPhospho [S62]	7.88392e-05	0	1	1	5	Q96Q45	Q96Q45 [60-70]	0	1739.87	0	113.7	91.2	102.3	106.1	104.7	121.3		Not Found	High	High	Not Found	High	Not Found	High	High	Not Found	Not Found	Not Found	High	0	7.35e-06	4.71
FALSE	High	[R].RPSTEDTHEVDSK.[A]	1xPhospho [T/S]; 1xTMT6plex [K13]; 1xTMT6plex [N-Term]	Q96QT4 1xPhospho [S/T]	0.00192962	0.000108793	1	1	6	Q96QT4	Q96QT4 [1502-1514]	0	2038.98	0	105.7	83.2	99.3	88.2	102	139.5		Not Found	High	High	Not Found	Not Found	Not Found	Not Found	Not Found	Not Found	Not Found	High	High	3.165e-05	0.0001203	3.75
FALSE	High	[R].RPSSTSVPLGDK.[G]	1xPhospho [S/T]; 1xTMT6plex [K12]; 1xTMT6plex [N-Term]	Q9NXR1 1xPhospho [S]	0.000548912	0	1	1	4	Q9NXR1	Q9NXR1 [304-315]	0	1781.96	0	93.5	98.9	95.3	102.2	97.7	98.6		Not Found	Not Found	Not Found	Not Found	Not Found	High	High	Not Found	Not Found	Not Found	Not Found	High	0	6.261e-05	3.38
FALSE	High	[R].RPSSSEIITEGK.[R]	1xPhospho [S]; 1xTMT6plex [K12]; 1xTMT6plex [N-Term]	Q9BQF6 1xPhospho [S]	0.000205282	0	1	1	2	Q9BQF6	Q9BQF6 [9-20]	0	1841.98	0	99.3	100.5	97.9	99.6	89.6	109.7		Not Found	Not Found	Not Found	Not Found	High	Not Found	Not Found	Not Found	Not Found	Not Found	Not Found	High	0	3.641e-05	4.3
FALSE	High	[R].MPSARPPSPPLSSWER.[V]	1xPhospho [S8]; 1xOxidation [M1]; 1xTMT6plex [N-Term]	O43896 1xPhospho [S915]	0.198727	0.00845485	1	1	2	O43896	O43896 [908-923]	0	2120.02	0	94.9	102.5	105.4	107.3	96.8	89.9		Not Found	Not Found	Not Found	Not Found	Not Found	High	Not Found	Not Found	Not Found	Not Found	Not Found	High	0.004974	0.07606	3.05
FALSE	High	[R].RPSSMYSTGGK.[R]	1xPhospho [S]; 1xOxidation [M5]; 1xTMT6plex [K11]; 1xTMT6plex [N-Term]	O75382 1xPhospho [S]	0.0361686	0.000484649	1	1	2	O75382	O75382 [452-462]	0	1724.84	0	101.1	87	89.4	102.5	86.7	126.5		Not Found	Not Found	Not Found	Not Found	Not Found	High	Not Found	Not Found	Not Found	Not Found	Not Found	High	0.000216	0.003386	2.1
FALSE	High	[R].RPSSMYSTGGK.[R]	1xPhospho [S]; 1xTMT6plex [K11]; 1xTMT6plex [N-Term]	O75382 1xPhospho [S]	0.000377394	0	1	1	3	O75382	O75382 [452-462]	0	1708.85	0	82.8	82.5	89.4	93	100.8	107.4		Not Found	Not Found	Not Found	Not Found	Not Found	Not Found	High	Not Found	Not Found	Not Found	Not Found	High	0	3.046e-05	3.76
FALSE	High	[R].RPSQGPPAR.[S]	1xPhospho [S3]; 1xTMT6plex [N-Term]	Q9C0C2 1xPhospho [S1545]	0.00352099	0.000108793	1	1	18	Q9C0C2	Q9C0C2 [1543-1551]	0	1274.66	0	94.6	89.3	96.2	91.2	107.1	120		Not Found	Not Found	High	High	High	High	High	High	High	Not Found	Not Found	High	3.165e-05	0.0002198	3.55
FALSE	High	[R].RPSQEQSASASSGQPQAPLNR.[E]	1xPhospho [S3]; 1xTMT6plex [N-Term]	Q5T1M5 1xPhospho [S956]	6.41807e-12	0	1	1	16	Q5T1M5	Q5T1M5 [954-974]	0	2505.2	0	88.8	92.2	96.7	96.5	108.6	119.4		Not Found	High	High	High	High	High	High	High	High	Not Found	Not Found	High	0	2.003e-12	8.84
FALSE	High	[R].RPSPQPSPR.[D]	2xPhospho [S3; S7]; 1xTMT6plex [N-Term]	Q9UQ35 2xPhospho [S2702; S2706]	0.134831	0.0044861	1	1	3	Q9UQ35	Q9UQ35 [2700-2708]	0	1410.65	0	109.9	92.6	93.4	77.9	98.7	143		High	Not Found	High	Not Found	Not Found	Not Found	Not Found	Not Found	Not Found	Not Found	High	High	0.001675	0.02721	3
FALSE	High	[R].RPSPQPSPR.[D]	1xPhospho [S3]; 1xTMT6plex [N-Term]	Q9UQ35 1xPhospho [S2702]	0.188728	0.00729498	1	1	3	Q9UQ35	Q9UQ35 [2700-2708]	0	1330.68	0	94.9	91.1	104.3	81.1	106	140.8		Not Found	High	High	Not Found	Not Found	Not Found	Not Found	High	Not Found	Not Found	Not Found	High	0.003806	0.05315	2.27
FALSE	High	[R].RPSPPEPWDEEDGASCSTFFGSEER.[T]	1xCarbamidomethyl [C16]; 1xPhospho [S3]; 1xTMT6plex [N-Term]	Q9P1Y6 1xPhospho [S936]	9.7046e-06	0	1	1	5	Q9P1Y6	Q9P1Y6 [934-958]	0	3178.33	0	92.2	94.7	101.4	92.2	105.7	117.3		High	High	High	High	Not Found	Not Found	Not Found	Not Found	Not Found	Not Found	High	High	0	1.063e-06	5.18
FALSE	High	[K].MPSFGASAPGK.[S]	1xPhospho [S3]; 1xTMT6plex [K11]; 1xTMT6plex [N-Term]	Q8IVF2 1xPhospho [S1172]	0.000670896	0	1	1	5	Q8IVF2	Q8IVF2 [1170-1180]	0	1587.8	0	116.6	95.8	97.5	102.4	103.7	86.4		Not Found	Not Found	Not Found	Not Found	Not Found	Not Found	High	High	High	Not Found	Not Found	High	0	5.034e-05	3.42
FALSE	High	[K].MPSFGMLSPGK.[S]	1xPhospho [S8]; 1xOxidation [M6]; 1xTMT6plex [K11]; 1xTMT6plex [N-Term]	Q8IVF2 1xPhospho [S4477]	0.0345514	0.000389981	1	1	1	Q8IVF2	Q8IVF2 [4470-4480]	0	1705.85	0	87.6	104.4	107.4	108.1	99.3	91.7		Not Found	Not Found	Not Found	Not Found	Not Found	Not Found	Not Found	High	Not Found	Not Found	Not Found	High	0.0001904	0.003037	2.58
FALSE	High	[K].RPLSGPDVGTPQPAGLASGAK.[L]	1xPhospho [S4]; 1xTMT6plex [K21]; 1xTMT6plex [N-Term]	O96013 1xPhospho [S181]	0.00308062	0.000108793	1	1	1	O96013	O96013 [178-198]	0	2514.35	0	110.3	102.8	93.2	96.4	93.4	86.4		Not Found	Not Found	Not Found	Not Found	Not Found	High	Not Found	Not Found	Not Found	Not Found	Not Found	High	3.165e-05	0.0001794	4.19
FALSE	High	[R].RPSPHDEEEFEVEEAAEAQAEPK.[D]	1xPhospho [S3]; 1xTMT6plex [K23]; 1xTMT6plex [N-Term]	P11137 1xPhospho [S1324]	4.61678e-06	0	1	1	3	P11137	P11137 [1322-1344]	0	3162.47	0	97.3	105.2	98.7	100.4	111	79.7		High	Not Found	Not Found	Not Found	Not Found	Not Found	Not Found	Not Found	Not Found	Not Found	High	High	0	5.341e-07	5.17
FALSE	High	[R].RPSPGEMR.[D]	1xPhospho [S3]; 1xTMT6plex [N-Term]	Q6NYC8 1xPhospho [S125]	0.123121	0.00362673	1	1	2	Q6NYC8	Q6NYC8 [123-130]	0	1238.59	0	89.1	90.6	92.2	88.3	105.3	131.6		Not Found	Not Found	Not Found	High	Not Found	Not Found	High	Not Found	Not Found	Not Found	Not Found	High	0.001309	0.02345	2.57
FALSE	High	[R].RPSLPPSK.[Q]	1xPhospho [S3]; 1xTMT6plex [K8]; 1xTMT6plex [N-Term]	Q6PJT7 1xPhospho [S343]	0.0580388	0.00130733	1	1	11	Q6PJT7	Q6PJT7 [341-348]	0	1419.81	0	89	93.4	89	94.8	96	105		Not Found	Not Found	Not Found	Not Found	Not Found	High	High	Not Found	Not Found	Not Found	Not Found	High	0.0008897	0.01269	2.35
FALSE	High	[R].RPSLLSEFQPGNER.[S]	1xPhospho [S3]; 1xTMT6plex [N-Term]	Q9Y618 1xPhospho [S67]	0.00258933	0.000108793	1	1	1	Q9Y618	Q9Y618 [65-78]	0	1938.96	0	75	92.5	104.9	98.1	106.4	117.4		Not Found	Not Found	Not Found	Not Found	Not Found	High	Not Found	Not Found	Not Found	Not Found	Not Found	High	3.165e-05	0.0001538	3.57
FALSE	High	[K].MPSFGVSAPGK.[S]	1xPhospho [S3]; 1xOxidation [M1]; 1xTMT6plex [K11]; 1xTMT6plex [N-Term]	Q8IVF2 1xPhospho [S842]; 1xPhospho [S1846]; 1xPhospho [S3180]; 1xPhospho [S4679]; 1xPhospho [S6343]; 1xPhospho [S8172]; 1xPhospho [S10331]; 1xPhospho [S12820]; 1xPhospho [S15639]; 1xPhospho [S18623]; 1xPhospho [S21772]; 1xPhospho [S25581]; 1xPhospho [S29555]; 1xPhospho [S33694]; 1xPhospho [S37998]	0.0672311	0.00175403	1	1	2	Q8IVF2	Q8IVF2 [840-850]; [1005-1015]; [1335-1345]; [1500-1510]; [1665-1675]; [1830-1840]; [2160-2170]; [2490-2500]; [2820-2830]; [2985-2995]; [3150-3160]; [3810-3820]; [3975-3985]; [4140-4150]; [4305-4315]	0	1631.83	0	116.8	110.9	86.9	92.9	107.3	84.7		Not Found	Not Found	Not Found	Not Found	Not Found	Not Found	High	Not Found	Not Found	Not Found	Not Found	High	0.0005796	0.008744	2.7
FALSE	High	[R].RPSLGELLLR.[H]	1xPhospho [S3]; 1xTMT6plex [N-Term]	Q8N612 1xPhospho [S859]	0.00547079	0.000108793	1	1	1	Q8N612	Q8N612 [857-866]	0	1462.83	0	83.4	109.6	102.3	87.1	93.3	110.3		Not Found	Not Found	Not Found	Not Found	Not Found	Not Found	High	Not Found	Not Found	Not Found	Not Found	High	3.165e-05	0.0003123	2.83
FALSE	High	[K].MPSLEISAPK.[V]	1xPhospho [S3]; 1xTMT6plex [K10]; 1xTMT6plex [N-Term]	Q09666 1xPhospho [S4908]	0.00217632	0.000108793	1	1	2	Q09666	Q09666 [4906-4915]	0	1610.86	0	97.1	96.6	105	96	104.5	99.1		Not Found	Not Found	Not Found	Not Found	Not Found	High	High	Not Found	Not Found	Not Found	Not Found	High	3.165e-05	0.0002979	3.69
FALSE	High	[R].RPSLEHR.[Q]	1xPhospho [S3]; 1xTMT6plex [N-Term]	Q8WU20 1xPhospho [S428]	0.0147543	0.000209539	1	1	2	Q8WU20	Q8WU20 [426-432]	0	1203.62	0	105	94.4	95.6	92.4	103.4	126.6		Not Found	High	High	Not Found	Not Found	Not Found	Not Found	Not Found	Not Found	Not Found	Not Found	High	0.0001195	0.0009501	3.06
FALSE	High	[K].MPTFSTPGAK.[G]	1xPhospho [S5]; 1xTMT6plex [K10]; 1xTMT6plex [N-Term]	Q09666 1xPhospho [S637]	0.00247099	0.000108793	1	1	1	Q09666	Q09666 [633-642]	0	1574.81	0	111.5	113.8	81.1	98	104.6	107.5		Not Found	Not Found	Not Found	Not Found	Not Found	Not Found	Not Found	High	Not Found	Not Found	Not Found	High	3.165e-05	0.0001476	2.35
FALSE	High	[R].RPSGTGTGPEDGRPSLGSPYGQPPR.[F]	2xPhospho [S/T]; 1xTMT6plex [N-Term]	P50479 2xPhospho [T/S]	0.0191061	0.000295797	1	1	3	P50479	P50479 [118-142]	0	2912.33	0	93.8	86	91.5	88	100.6	127.6		Not Found	High	High	Not Found	Not Found	Not Found	Not Found	Not Found	Not Found	Not Found	Not Found	High	0.000144	0.001323	3.37
FALSE	High	[R].RPSGTGTGPEDGRPSLGSPYGQPPR.[F]	1xPhospho [T/S]; 1xTMT6plex [N-Term]	P50479 1xPhospho [S/T]	9.57796e-07	0	1	1	48	P50479	P50479 [118-142]	0	2832.36	0	94.6	100.2	95.4	110.7	98.8	100.7		Not Found	Not Found	Not Found	Not Found	High	High	High	High	Not Found	Not Found	Not Found	High	0	1.243e-07	6.59
FALSE	High	[R].RPSGPDGAAR.[E]	1xPhospho [S3]; 1xTMT6plex [N-Term]	Q8NDX5 1xPhospho [S842]	0.106282	0.00303607	1	1	1	Q8NDX5	Q8NDX5 [840-849]	0	1292.63	0	100	85.5	85.1	76.7	76.9	169.8		Not Found	Not Found	High	Not Found	Not Found	Not Found	Not Found	Not Found	Not Found	Not Found	Not Found	High	0.001084	0.01848	2.77
FALSE	High	[R].RPSESDKEDELDKVK.[S]	1xPhospho [S3]; 3xTMT6plex [K7; K13; K15]; 1xTMT6plex [N-Term]	Q02952 1xPhospho [S627]	0.040408	0.000768703	1	1	3	Q02952	Q02952 [625-639]	2	2771.5	0	81.4	120.1	89.5	153.4	71.4	45.5		Not Found	Not Found	Not Found	Not Found	High	High	Not Found	Not Found	Not Found	Not Found	Not Found	High	0.0002934	0.003884	3.34
FALSE	High	[R].RPSESDKEDELDK.[V]	1xPhospho [S]; 2xTMT6plex [K7; K13]; 1xTMT6plex [N-Term]	Q02952 1xPhospho [S]	0.0164062	0.000295797	1	1	6	Q02952	Q02952 [625-637]	1	2315.17	0	98.9	138.1	88.9	100.8	74.5	54.8		High	High	High	Not Found	Not Found	Not Found	Not Found	Not Found	Not Found	Not Found	High	High	0.000144	0.001084	3.23
FALSE	High	[K].MPSFGVSAPGK.[S]	1xPhospho [S3]; 1xTMT6plex [K11]; 1xTMT6plex [N-Term]	Q8IVF2 1xPhospho [S842]; 1xPhospho [S1846]; 1xPhospho [S3180]; 1xPhospho [S4679]; 1xPhospho [S6343]; 1xPhospho [S8172]; 1xPhospho [S10331]; 1xPhospho [S12820]; 1xPhospho [S15639]; 1xPhospho [S18623]; 1xPhospho [S21772]; 1xPhospho [S25581]; 1xPhospho [S29555]; 1xPhospho [S33694]; 1xPhospho [S37998]	0.00113031	0.000108793	1	1	4	Q8IVF2	Q8IVF2 [840-850]; [1005-1015]; [1335-1345]; [1500-1510]; [1665-1675]; [1830-1840]; [2160-2170]; [2490-2500]; [2820-2830]; [2985-2995]; [3150-3160]; [3810-3820]; [3975-3985]; [4140-4150]; [4305-4315]	0	1615.83	0	126.1	98	91.8	88.4	106.2	96		Not Found	Not Found	Not Found	Not Found	Not Found	Not Found	Not Found	High	High	Not Found	Not Found	High	3.165e-05	7.781e-05	3.45
FALSE	High	[R].RPSTIAEQTVAK.[A]	1xPhospho [T/S]; 1xTMT6plex [K12]; 1xTMT6plex [N-Term]	Q9H0K1 1xPhospho [S/T]	9.64228e-07	0	1	1	2	Q9H0K1	Q9H0K1 [356-367]	0	1839.01	0	95.6	93.1	88.6	105.3	117	102.7		Not Found	Not Found	Not Found	Not Found	Not Found	High	Not Found	Not Found	Not Found	Not Found	Not Found	High	0	5.305e-07	4.49
FALSE	High	[K].RPISDDDCPSASK.[V]	1xCarbamidomethyl [C8]; 1xPhospho [S4]; 1xTMT6plex [K13]; 1xTMT6plex [N-Term]	Q96PU4 1xPhospho [S667]	0.025886	0.000295797	1	1	2	Q96PU4	Q96PU4 [664-676]	0	1985.94	0	90.6	88.4	95	99.9	109.4	111.5		Not Found	High	Not Found	High	Not Found	Not Found	Not Found	Not Found	Not Found	Not Found	Not Found	High	0.0001658	0.00204	3.42
FALSE	High	[R].MQSLSLNK.[-]	1xPhospho [S]; 1xTMT6plex [K8]; 1xTMT6plex [N-Term]	Q13442 1xPhospho [S]	0.0428435	0.000856746	1	1	2	Q13442	Q13442 [174-181]	0	1458.78	0	110.6	110.1	98.3	104	93.2	75.4		Not Found	Not Found	Not Found	Not Found	Not Found	Not Found	High	Not Found	Not Found	Not Found	Not Found	High	0.0006286	0.009424	2.96
FALSE	High	[R].RNSTTFPSR.[H]	1xPhospho [S3]; 1xTMT6plex [N-Term]	Q96E09 1xPhospho [S62]	0.00485146	0.000108793	1	1	3	Q96E09	Q96E09 [60-68]	1	1374.67	0	112.6	71.9	110.3	85.5	114.5	104.2		Not Found	Not Found	Not Found	Not Found	High	Not Found	Not Found	High	Not Found	Not Found	Not Found	High	3.165e-05	0.000277	3.16
FALSE	High	[R].RNSTIVLR.[T]	1xPhospho [S3]; 1xTMT6plex [N-Term]	Q8NEY1 1xPhospho [S452]	0.0927251	0.0025315	1	1	2	Q8NEY1	Q8NEY1 [450-457]	1	1267.71	0	89.9	84.2	104.8	100.6	98.9	98.3		Not Found	Not Found	Not Found	Not Found	High	High	Not Found	Not Found	Not Found	Not Found	Not Found	High	0.002925	0.04423	2.26
FALSE	High	[K].MSNSFHGIRPPQLEQPEK.[M]	1xPhospho [S]; 1xTMT6plex [K18]; 1xTMT6plex [N-Term]	O94955 1xPhospho [S]	0.0439709	0.000856746	1	1	5	O94955	O94955 [212-229]	0	2633.33	0	93.2	102.7	89	109.3	103.2	95.9		Not Found	Not Found	Not Found	Not Found	Not Found	Not Found	High	High	Not Found	Not Found	Not Found	High	0.0003161	0.004421	3.81
FALSE	High	[R].MSNSFTAIAK.[L]	1xPhospho [S2]; 1xTMT6plex [K10]; 1xTMT6plex [N-Term]	Q14D04 1xPhospho [S353]	0.00303973	0.000108793	1	1	1	Q14D04	Q14D04 [352-361]	0	1607.83	0	112.4	101.4	95.4	107.8	101.1	83.4		Not Found	Not Found	Not Found	Not Found	Not Found	Not Found	Not Found	High	Not Found	Not Found	Not Found	High	3.165e-05	0.0001778	2.84
FALSE	High	[R].RNSSSSSSPSERPR.[Q]	1xPhospho [S]; 1xTMT6plex [N-Term]	Q32P44 1xPhospho [S]	0.000170207	0	1	1	9	Q32P44	Q32P44 [154-167]	1	1842.87	0	90	79.2	85.2	98.3	98	147.7		High	High	High	Not Found	High	High	Not Found	Not Found	Not Found	Not Found	High	High	0	1.487e-05	4.78
FALSE	High	[R].RNSSIVGR.[R]	1xPhospho [S3]; 1xTMT6plex [N-Term]	Q96N67 1xPhospho [S439]	0.117976	0.00337449	1	1	1	Q96N67	Q96N67 [437-444]	1	1197.63	0	108.8	66.6	89.5	98.1	84.4	136.9		Not Found	Not Found	Not Found	Not Found	Not Found	Not Found	High	Not Found	Not Found	Not Found	Not Found	High	0.001264	0.02198	1.11
FALSE	High	[R].RNSSEASSGDFLDLK.[G]	1xPhospho [S]; 1xTMT6plex [K15]; 1xTMT6plex [N-Term]	Q9UK76 1xPhospho [S]	1.39433e-09	0	1	1	39	Q9UK76	Q9UK76 [85-99]	1	2164.07	0	103.2	109.7	103.7	99.7	90.9	79.3		Not Found	Not Found	Not Found	Not Found	High	High	High	High	High	Not Found	Not Found	High	0	8.606e-09	6.77
FALSE	High	[K].MSPDEGQEELEEVQAELK.[K]	1xTMT6plex [K18]; 1xTMT6plex [N-Term]		4.49482e-06	0	1	1	1	Q9HC07	Q9HC07 [181-198]	0	2519.26	0	99.7	99.6	99.4	98.7	105.2	113.3		Not Found	Not Found	Not Found	Not Found	Not Found	Not Found	Not Found	Not Found	Not Found	High	Not Found	High	0	5.222e-07	5.4
FALSE	High	[K].MSPDEGQEELEEVQAELK.[K]	1xOxidation [M1]; 1xTMT6plex [K18]; 1xTMT6plex [N-Term]		3.41701e-07	0	1	1	1	Q9HC07	Q9HC07 [181-198]	0	2535.25	0	92.2	108	103.8	88.4	110.7	125.2		Not Found	Not Found	Not Found	Not Found	Not Found	Not Found	Not Found	Not Found	Not Found	High	Not Found	High	0	4.805e-08	4.68
FALSE	High	[R].RNSRDGDPLPSSLSCK.[V]	1xCarbamidomethyl [C15]; 1xPhospho [S3]; 1xTMT6plex [K16]; 1xTMT6plex [N-Term]	P53602 1xPhospho [S96]	0.000249246	0	1	1	1	P53602	P53602 [94-109]	2	2327.16	0	92.2	90.4	102	131.2	94.2	96.2		Not Found	Not Found	Not Found	Not Found	Not Found	High	Not Found	Not Found	Not Found	Not Found	Not Found	High	0	2.108e-05	3.01
FALSE	High	[R].RNSLTGEEGQLAR.[V]	1xPhospho [S3]; 1xTMT6plex [N-Term]	Q9BX95 1xPhospho [S112]	1.65771e-05	0	1	1	4	Q9BX95	Q9BX95 [110-122]	1	1739.86	0	107.4	88.9	112.4	85.8	106	119.6		High	High	High	Not Found	Not Found	Not Found	Not Found	Not Found	Not Found	Not Found	High	High	0	1.743e-06	4.51
FALSE	High	[R].RNSLSGSSTGSQEQR.[A]	1xPhospho [S3]; 1xTMT6plex [N-Term]	Q96J92 1xPhospho [S1217]	7.37756e-07	0	1	1	2	Q96J92	Q96J92 [1215-1229]	1	1902.89	0	95.6	90	91.8	107.4	97.9	136.5		Not Found	High	High	Not Found	Not Found	Not Found	Not Found	Not Found	Not Found	Not Found	Not Found	High	0	9.779e-08	4.47
FALSE	High	[R].MSPGVAGSPR.[I]	1xPhospho [S2]; 1xTMT6plex [N-Term]	Q15596 1xPhospho [S493]	0.0181206	0.000295797	1	1	1	Q15596	Q15596 [492-501]	0	1267.61	0	91.5	92.7	103.1	87.8	101.6	130		Not Found	Not Found	Not Found	High	Not Found	Not Found	Not Found	Not Found	Not Found	Not Found	Not Found	High	0.000144	0.001232	2.66
FALSE	High	[R].RNSLILKPKPDPAQQTDSQNSDTEQYFR.[E]	1xPhospho [S3]; 2xTMT6plex [K7; K9]; 1xTMT6plex [N-Term]	Q9NXD2 1xPhospho [S607]	1.84555e-06	0	1	1	1	Q9NXD2	Q9NXD2 [605-632]	1	4044.08	0	100.7	104.2	102.4	111.8	113.2	57.8		Not Found	Not Found	Not Found	Not Found	Not Found	Not Found	Not Found	High	Not Found	Not Found	Not Found	High	0	2.287e-07	4.53
FALSE	High	[R].RNSLGGDVLFVGK.[H]	1xPhospho [S3]; 1xTMT6plex [K13]; 1xTMT6plex [N-Term]	Q9H0D6 1xPhospho [S678]	5.07154e-07	0	1	1	1	Q9H0D6	Q9H0D6 [676-688]	1	1900.05	0	84.6	97.3	90.2	114	113.6	81.7		Not Found	Not Found	Not Found	Not Found	Not Found	Not Found	High	Not Found	Not Found	Not Found	Not Found	High	0	6.895e-08	5.43
FALSE	High	[R].RNSLDGGGR.[S]	1xPhospho [S3]; 1xTMT6plex [N-Term]	O43896 1xPhospho [S1033]	0.00743549	0.000108793	1	1	2	O43896	O43896 [1031-1039]	1	1240.6	0	90.4	96.2	92.3	106.9	90.5	135.8		High	Not Found	Not Found	Not Found	Not Found	Not Found	Not Found	Not Found	Not Found	Not Found	High	High	3.165e-05	0.000432	3.02
FALSE	High	[R].RNSFTPLSSSNTIR.[R]	1xPhospho [S3]; 1xTMT6plex [N-Term]	O60825 1xPhospho [S466]	0.0551313	0.0010351	1	1	1	O60825	O60825 [464-477]	1	1888.95	0	117.4	120.4	96.2	111.3	92.4	79.1		Not Found	Not Found	Not Found	Not Found	Not Found	High	Not Found	Not Found	Not Found	Not Found	Not Found	High	0.0003628	0.006378	2.86
FALSE	High	[R].RNSFSENEK.[H]	1xPhospho [S3]; 1xTMT6plex [K9]; 1xTMT6plex [N-Term]	Q9HCG8 1xPhospho [S829]	0.00558142	0.000108793	1	1	2	Q9HCG8	Q9HCG8 [827-835]	1	1648.81	0	102.9	93.5	109.9	95.6	98.3	92.4		Not Found	Not Found	Not Found	High	Not Found	Not Found	Not Found	Not Found	Not Found	Not Found	Not Found	High	3.165e-05	0.0003195	3.8
FALSE	High	[R].RNSELFQTLISK.[S]	1xPhospho [S3]; 1xTMT6plex [K12]; 1xTMT6plex [N-Term]	Q6ZWB6 1xPhospho [S410]	1.73722e-05	0	1	1	1	Q6ZWB6	Q6ZWB6 [408-419]	1	1974.08	0	104.6	88	94.8	109.1	122.5	83.9		Not Found	Not Found	Not Found	Not Found	Not Found	Not Found	Not Found	High	Not Found	Not Found	Not Found	High	0	1.823e-06	4.32
FALSE	High	[R].RNSEGSELSCTEGSLTSSLDSR.[R]	1xCarbamidomethyl [C10]; 1xPhospho [S]; 1xTMT6plex [N-Term]	Q5T5U3 1xPhospho [S]	8.61163e-10	0	1	1	9	Q5T5U3	Q5T5U3 [1667-1688]	1	2681.19	0	100.7	86.4	98.1	103.8	103	118.4		High	High	High	Not Found	Not Found	Not Found	Not Found	Not Found	Not Found	Not Found	High	High	0	1.872e-10	6.72
FALSE	High	[R].MSPKPELTEEQK.[Q]	1xPhospho [S2]; 2xTMT6plex [K4; K12]; 1xTMT6plex [N-Term]	P41208 1xPhospho [S20]	0.00728825	0.000108793	1	1	1	P41208	P41208 [19-30]	0	2184.16	0	97.9	139.5	96.9	128.1	73.5	45.4		Not Found	Not Found	Not Found	Not Found	Not Found	High	Not Found	Not Found	Not Found	Not Found	Not Found	High	3.165e-05	0.0004241	2.84
FALSE	High	[R].RNSCNVGGGGGGFK.[H]	1xCarbamidomethyl [C4]; 1xPhospho [S3]; 1xTMT6plex [K14]; 1xTMT6plex [N-Term]	Q7L2J0 1xPhospho [S152]	9.44533e-05	0	1	1	2	Q7L2J0	Q7L2J0 [150-163]	1	1904.92	0	98.7	108.4	87.5	101.7	86.6	86.1		Not Found	Not Found	Not Found	Not Found	Not Found	High	Not Found	Not Found	Not Found	Not Found	Not Found	High	0	8.697e-06	3.43
FALSE	High	[K].RMSPKPELTEEQK.[Q]	1xPhospho [S3]; 2xTMT6plex [K5; K13]; 1xTMT6plex [N-Term]	P41208 1xPhospho [S20]	0.0707392	0.00184012	1	1	1	P41208	P41208 [18-30]	1	2340.26	0	106.6	98.8	102.9	113.9	113.9	67.2		Not Found	Not Found	Not Found	Not Found	Not Found	Not Found	High	Not Found	Not Found	Not Found	Not Found	High	0.0006286	0.009575	2.52
FALSE	High	[R].RMSDPPLSTMPTAPGLR.[K]	1xPhospho [S3]; 1xTMT6plex [N-Term]	P78314 1xPhospho [S278]	4.71041e-06	0	1	1	1	P78314	P78314 [276-292]	1	2136.05	0	86.6	113.3	95.9	99	91.1	115.5		Not Found	Not Found	Not Found	Not Found	Not Found	High	Not Found	Not Found	Not Found	Not Found	Not Found	High	0	5.443e-07	4.89
FALSE	High	[R].RMSDEFVDSFK.[K]	1xPhospho [S3]; 1xTMT6plex [K11]; 1xTMT6plex [N-Term]	Q92934 1xPhospho [S118]	3.21562e-05	0	1	1	3	Q92934	Q92934 [116-126]	1	1898.91	0	97.4	94.3	99.8	92.8	105.7	111.6		Not Found	Not Found	Not Found	Not Found	High	High	Not Found	Not Found	Not Found	Not Found	Not Found	High	0	3.218e-06	4.76
FALSE	High	[K].RMSADMSEIEAR.[I]	1xPhospho [S3]; 1xTMT6plex [N-Term]	O43318 1xPhospho [S389]	8.83659e-06	0	1	1	4	O43318	O43318 [387-398]	1	1704.76	0	96.9	94	95.9	99.4	93.8	117.6		Not Found	High	High	Not Found	Not Found	Not Found	Not Found	Not Found	Not Found	Not Found	High	High	0	9.772e-07	4.6
FALSE	High	[R].RLTVTSLQETGLK.[V]	1xPhospho [T3]; 1xTMT6plex [K13]; 1xTMT6plex [N-Term]	Q14315 1xPhospho [T2412]	0.00472363	0.000108793	1	1	1	Q14315	Q14315 [2410-2422]	1	1984.12	0	86.9	107.7	95.7	106.9	109	103.5		Not Found	Not Found	Not Found	Not Found	Not Found	Not Found	High	Not Found	Not Found	Not Found	Not Found	High	3.165e-05	0.0002692	3.06
FALSE	High	[K].MSLPDVDLDLKGPK.[M]	1xPhospho [S2]; 2xTMT6plex [K11; K14]; 1xTMT6plex [N-Term]	Q09666 1xPhospho [S1068]	0.000962723	0	1	1	1	Q09666	Q09666 [1067-1080]	1	2295.26	0	87.1	85.5	99.6	148.7	113.5	64.2		Not Found	Not Found	Not Found	Not Found	Not Found	Not Found	High	Not Found	Not Found	Not Found	Not Found	High	0	6.806e-05	4.1
FALSE	High	[K].MSLPDVDLDLK.[G]	1xPhospho [S2]; 1xOxidation [M1]; 1xTMT6plex [K11]; 1xTMT6plex [N-Term]	Q09666 1xPhospho [S1068]	0.00295957	0.000108793	1	1	2	Q09666	Q09666 [1067-1077]	0	1799.93	0	104.7	95.6	93.4	98.2	109.3	67.9		Not Found	Not Found	Not Found	Not Found	High	High	Not Found	Not Found	Not Found	Not Found	Not Found	High	3.165e-05	0.0001729	3.51
FALSE	High	[K].MSLPDVDLDLK.[G]	1xPhospho [S2]; 1xTMT6plex [K11]; 1xTMT6plex [N-Term]	Q09666 1xPhospho [S1068]	0.000464375	0	1	1	2	Q09666	Q09666 [1067-1077]	0	1783.93	0	97.9	94.8	87.1	103	105.2	67.7		Not Found	Not Found	Not Found	Not Found	Not Found	High	Not Found	Not Found	Not Found	Not Found	Not Found	High	0	3.669e-05	4.01
FALSE	High	[K].MSGSASSENR.[E]	1xPhospho [S]; 1xTMT6plex [N-Term]	O43493 1xPhospho [S]	0.025213	0.000295797	1	1	3	O43493	O43493 [346-355]	0	1334.56	0	92.6	80.1	79.4	100.7	102.5	188		High	Not Found	Not Found	Not Found	Not Found	Not Found	Not Found	Not Found	Not Found	Not Found	Not Found	High	0.0001658	0.002349	2.5
FALSE	High	[R].RPILQLSPPGPR.[G]	1xPhospho [S7]; 1xTMT6plex [N-Term]	Q8N3X1 1xPhospho [S18]	3.1517e-05	0	1	1	9	Q8N3X1	Q8N3X1 [12-23]	0	1639.92	0	93	89.4	93.3	107.2	106.4	117.7		Not Found	Not Found	Not Found	Not Found	Not Found	Not Found	High	High	Not Found	Not Found	Not Found	High	0	4.153e-06	4.29
FALSE	High	[K].MQVDQEEPHVEEQQQQTPAENK.[A]	1xTMT6plex [K22]; 1xTMT6plex [N-Term]		1.11028e-08	0	1	1	1	P34932	P34932 [522-543]	0	3080.5	0	95	99.7	104.9	95.5	100.3	83.6		Not Found	Not Found	Not Found	Not Found	Not Found	Not Found	Not Found	Not Found	Not Found	High	Not Found	High	0	1.996e-09	5.86
FALSE	High	[K].MQVDQEEPHVEEQQQQTPAENK.[A]	1xOxidation [M1]; 1xTMT6plex [K22]; 1xTMT6plex [N-Term]		0.000261199	0	1	1	2	P34932	P34932 [522-543]	0	3096.49	0	102.1	103	100.7	93.3	101.1	90.1		Not Found	Not Found	Not Found	Not Found	Not Found	Not Found	Not Found	Not Found	Not Found	High	Not Found	High	0	2.69e-05	4.3
FALSE	High	[K].RPGSVSSTDQER.[E]	1xPhospho [S4]; 1xTMT6plex [N-Term]	Q9H1B7 1xPhospho [S334]	0.000458203	0	1	1	6	Q9H1B7	Q9H1B7 [331-342]	0	1627.76	0	95.4	76.8	94.5	80.9	107.1	170.5		High	High	High	Not Found	Not Found	High	Not Found	High	Not Found	Not Found	High	High	0	3.628e-05	3.69
FALSE	High	[K].RPGGSSPLNAVPCEGPPGSEPPR.[R]	1xCarbamidomethyl [C13]; 1xPhospho [S]; 1xTMT6plex [N-Term]	P48634 1xPhospho [S]	5.60849e-08	0	1	1	2	P48634	P48634 [1686-1708]	0	2624.25	0	89.8	94.4	111.6	115.5	86.3	94.3		Not Found	Not Found	Not Found	Not Found	High	Not Found	Not Found	Not Found	Not Found	Not Found	Not Found	High	0	8.973e-09	4.91
FALSE	High	[R].RPGGAGGPPIQDEDEGEEGPTEPPPAEPR.[T]	1xTMT6plex [N-Term]		4.23415e-08	0	1	1	1	Q9BZL4	Q9BZL4 [364-392]	0	3167.51	0	89.5	80.9	96.5	91.5	101.5	156.2		Not Found	Not Found	Not Found	Not Found	Not Found	Not Found	Not Found	Not Found	Not Found	High	Not Found	High	0	6.925e-09	5.77
FALSE	High	[R].RPGFSPTSHR.[L]	1xPhospho [S5]; 1xTMT6plex [N-Term]	Q8WUA4 1xPhospho [S901]	0.0327893	0.000389981	1	1	1	Q8WUA4	Q8WUA4 [897-906]	0	1450.72	0	88.6	68.9	124.3	74.3	97.2	122.9		Not Found	Not Found	Not Found	Not Found	Not Found	High	Not Found	Not Found	Not Found	Not Found	Not Found	High	0.0001904	0.002822	2.36
FALSE	High	[R].MREDYDSVEQDGDEPGPQR.[S]	1xOxidation [M1]; 1xTMT6plex [N-Term]		0.0986764	0.00260894	1	1	1	Q9Y5S9	Q9Y5S9 [50-68]	1	2468.08	0	87	83.9	106.1	85.9	112	134.3		Not Found	Not Found	Not Found	Not Found	Not Found	Not Found	Not Found	Not Found	Not Found	High	Not Found	High	0.0009733	0.01632	2.7
FALSE	High	[K].RPESPSEISPIK.[G]	1xPhospho [S]; 1xTMT6plex [K12]; 1xTMT6plex [N-Term]	Q7Z5K2 1xPhospho [S]	0.000336819	0	1	1	4	Q7Z5K2	Q7Z5K2 [218-229]	0	1878.01	0	97.1	96	98.1	97.8	98.2	103.7		Not Found	Not Found	Not Found	Not Found	High	High	Not Found	Not Found	Not Found	Not Found	Not Found	High	0	3.407e-05	4.15
FALSE	High	[K].RPEPSTLENITDDKYATVSSPSK.[S]	1xPhospho [S]; 2xTMT6plex [K14; K23]; 1xTMT6plex [N-Term]	Q01804 1xPhospho [S]	1.06605e-06	0	1	1	2	Q01804	Q01804 [527-549]	1	3302.71	0	94.5	99.8	99	112.9	101.6	65.7		Not Found	Not Found	Not Found	Not Found	Not Found	High	Not Found	Not Found	Not Found	Not Found	Not Found	High	0	3.883e-07	6.03
FALSE	High	[R].RPEGPGAQAPSSPR.[V]	1xPhospho [S]; 1xTMT6plex [N-Term]	P40222 1xPhospho [S]	5.03646e-06	0	1	1	69	P40222	P40222 [504-517]	0	1715.84	0	96.4	89.1	94.8	84.1	95.9	128.7		Not Found	High	High	High	High	High	High	High	High	Not Found	Not Found	High	0	1.571e-06	5.05
FALSE	High	[R].RPEGASNESERD.[-]	1xTMT6plex [N-Term]		4.58711e-07	0	1	1	1	O75381	O75381 [366-377]	1	1575.76	0	111.4	79.7	113.7	96	95.6	147.2		Not Found	Not Found	Not Found	Not Found	Not Found	Not Found	Not Found	Not Found	Not Found	High	Not Found	High	0	6.309e-08	4.61
FALSE	High	[R].MSADMSEIEAR.[I]	1xPhospho [S2]; 1xTMT6plex [N-Term]	O43318 1xPhospho [S389]	4.31672e-05	0	1	1	7	O43318	O43318 [388-398]	0	1548.66	0	88.4	93.9	93.1	101.9	103.6	119.1		High	High	High	Not Found	Not Found	Not Found	Not Found	Not Found	Not Found	Not Found	High	High	0	4.234e-06	3.78
FALSE	High	[R].MQSLQLDCVAVPSSR.[S]	1xCarbamidomethyl [C8]; 1xPhospho [S3]; 1xTMT6plex [N-Term]	Q13546 1xPhospho [S320]	9.38756e-07	0	1	1	1	Q13546	Q13546 [318-332]	0	1999.95	0	91.8	96	95.7	97.6	112	99.1		Not Found	Not Found	Not Found	Not Found	Not Found	High	Not Found	Not Found	Not Found	Not Found	Not Found	High	0	1.221e-07	5.15
FALSE	High	[R].RPDPDSDEDEDYER.[E]	1xPhospho [S6]; 1xTMT6plex [N-Term]	Q96I25 1xPhospho [S155]	6.4966e-07	0	1	1	3	Q96I25	Q96I25 [150-163]	0	2046.81	0	79.8	75.2	86.4	84.5	106.1	183.3		High	Not Found	Not Found	Not Found	Not Found	Not Found	Not Found	Not Found	Not Found	Not Found	High	High	0	8.691e-08	4.56
FALSE	High	[R].MSDEFVDSFK.[K]	1xPhospho [S2]; 1xTMT6plex [K10]; 1xTMT6plex [N-Term]	Q92934 1xPhospho [S118]	0.00855245	0.000108793	1	1	1	Q92934	Q92934 [117-126]	0	1742.81	0	99.9	126.4	94.4	111.3	85.6	64.1		Not Found	Not Found	Not Found	Not Found	High	Not Found	Not Found	Not Found	Not Found	Not Found	Not Found	High	3.165e-05	0.000505	2.92
FALSE	High	[R].MSFSSLK.[R]	1xPhospho [S2]; 1xTMT6plex [K7]; 1xTMT6plex [N-Term]	P35240 1xPhospho [S10]	0.0763257	0.00210549	1	1	1	P35240	P35240 [9-15]	0	1337.69	0	107.4	102.8	85.8	99.5	92.8	107.9		Not Found	Not Found	Not Found	Not Found	Not Found	Not Found	Not Found	High	Not Found	Not Found	Not Found	High	0.0007236	0.01077	2.14
FALSE	High	[K].MSGGSTMSSGGGNTNNSNSK.[K]	1xPhospho [S2]; 1xTMT6plex [K20]; 1xTMT6plex [N-Term]	Q86U70 1xPhospho [S302]	0.00920261	0.000209539	1	1	1	Q86U70	Q86U70 [301-320]	0	2413.05	0	94.8	99.7	95.8	77.4	114.9	121.9		Not Found	Not Found	Not Found	Not Found	Not Found	High	Not Found	Not Found	Not Found	Not Found	Not Found	High	6.142e-05	0.00055	2.08
FALSE	High	[K].MSGGSTMSSGGGNTNNSNSK.[K]	1xPhospho [S2]; 1xOxidation [M]; 1xTMT6plex [K20]; 1xTMT6plex [N-Term]	Q86U70 1xPhospho [S302]	0.0311148	0.000389981	1	1	2	Q86U70	Q86U70 [301-320]	0	2429.05	0	105	99.3	107.3	99.7	107.5	79.3		Not Found	Not Found	Not Found	High	High	Not Found	Not Found	Not Found	Not Found	Not Found	Not Found	High	0.0001904	0.002591	2.29
FALSE	High	[K].RPATADSPKPSAK.[K]	1xPhospho [S7]; 2xTMT6plex [K9; K13]; 1xTMT6plex [N-Term]	Q03111 1xPhospho [S292]	0.00146704	0.000108793	1	1	4	Q03111	Q03111 [286-298]	0	2093.17	0	103.3	113	101.2	128.4	79.5	62.5		Not Found	Not Found	Not Found	Not Found	Not Found	High	High	High	Not Found	Not Found	Not Found	High	3.165e-05	9.586e-05	4.72
FALSE	High	[K].RPASVSSSAAVEHEQR.[E]	1xPhospho [S]; 1xTMT6plex [N-Term]	Q7Z5L9 1xPhospho [S]	8.96448e-10	0	1	1	7	Q7Z5L9	Q7Z5L9 [237-252]	0	2019.98	0	103.5	82.1	90.4	93	107.9	144.1		High	High	High	Not Found	Not Found	High	High	Not Found	Not Found	Not Found	Not Found	High	0	1.939e-10	6.85
FALSE	High	[K].RPASPSSPEHLPATPAESPAQR.[F]	2xPhospho [S4; S6]; 1xTMT6plex [N-Term]	Q9H7L9 2xPhospho [S234; S236]	5.99205e-05	0	1	1	4	Q9H7L9	Q9H7L9 [231-252]	0	2672.24	0	90.9	90.3	90.9	98	102.7	118		Not Found	Not Found	High	Not Found	Not Found	Not Found	Not Found	Not Found	Not Found	Not Found	High	High	0	5.724e-06	4.85
FALSE	High	[K].RPASPSHNGSSGGGYGASK.[K]	1xPhospho [S]; 1xTMT6plex [K19]; 1xTMT6plex [N-Term]	Q6PI98 1xPhospho [S]	1.22662e-05	0	1	1	2	Q6PI98	Q6PI98 [23-41]	0	2312.12	0	118.6	69.2	101.5	78.3	85.6	114.9		Not Found	Not Found	Not Found	Not Found	Not Found	High	Not Found	Not Found	Not Found	Not Found	Not Found	High	0	1.318e-06	3.14
FALSE	High	[R].RPAEATSSPTSPERPR.[H]	2xPhospho [S/T]; 1xTMT6plex [N-Term]	Q9BU76 2xPhospho [S/T]	0.0323626	0.000389981	1	1	5	Q9BU76	Q9BU76 [210-225]	0	2127.98	0	83.9	74.8	87.4	74.5	99.3	216.7		High	Not Found	Not Found	Not Found	Not Found	Not Found	Not Found	Not Found	Not Found	Not Found	High	High	0.0005796	0.009182	4.19
FALSE	High	[R].RPAEATSSPTSPERPR.[H]	1xPhospho [T/S]; 1xTMT6plex [N-Term]	Q9BU76 1xPhospho [S/T]	2.08286e-08	0	1	1	9	Q9BU76	Q9BU76 [210-225]	0	2048.01	0	97.2	79.4	96.3	78.2	98.3	143.8		Not Found	High	High	Not Found	High	High	High	High	Not Found	Not Found	Not Found	High	0	3.593e-09	6.42
FALSE	High	[K].RPAAAAAAGSASPR.[S]	1xPhospho [S]; 1xTMT6plex [N-Term]	Q96S55 1xPhospho [S]	2.15321e-07	0	1	1	7	Q96S55	Q96S55 [142-155]	0	1562.8	0	100.5	85.6	96.5	83.2	96.9	146		Not Found	Not Found	Not Found	High	High	High	High	High	Not Found	Not Found	Not Found	High	0	6.811e-08	5.79
FALSE	High	[K].MSGGSTMSSGGGNTNNSNSK.[K]	1xPhospho [S2]; 2xOxidation [M1; M7]; 1xTMT6plex [K20]; 1xTMT6plex [N-Term]	Q86U70 1xPhospho [S302]	0.016847	0.000295797	1	1	1	Q86U70	Q86U70 [301-320]	0	2445.04	0	120.4	113.8	114.2	87.8	104.6	73.9		Not Found	Not Found	Not Found	High	Not Found	Not Found	Not Found	Not Found	Not Found	Not Found	Not Found	High	0.000144	0.001122	2.71
FALSE	High	[K].RNSVDTATSSSLSTPSEPLSPTSSLGEER.[N]	1xPhospho [S/T]; 1xTMT6plex [N-Term]	P13807 1xPhospho [S/T]	6.81154e-09	0	1	1	10	P13807	P13807 [708-736]	1	3301.56	0	96.5	111.4	84.3	103.5	109.6	102.2		Not Found	High	High	Not Found	Not Found	Not Found	Not Found	Not Found	Not Found	Not Found	Not Found	High	0	1.272e-09	6.55
FALSE	High	[R].RPDHSGGSPSPPTSEPAR.[S]	1xPhospho [S]; 1xTMT6plex [N-Term]	Q8TAD8 1xPhospho [S]	5.49566e-07	0	1	1	11	Q8TAD8	Q8TAD8 [45-62]	0	2141	0	96	80.6	107.3	80.9	102.3	114.7		High	High	High	Not Found	High	High	High	High	Not Found	Not Found	High	High	0	1.034e-06	5.24
FALSE	High	[R].RVSGDAAQDLDR.[G]	1xPhospho [S3]; 1xTMT6plex [N-Term]	Q9Y4H2 1xPhospho [S560]	1.23517e-06	0	1	1	5	Q9Y4H2	Q9Y4H2 [558-569]	1	1611.77	0	94	77.7	87.3	82.3	110	152.3		High	Not Found	High	Not Found	Not Found	Not Found	Not Found	Not Found	Not Found	Not Found	High	High	0	1.578e-07	5.19
FALSE	High	[R].MPSARPPSPPLSSWER.[V]	1xPhospho [S8]; 1xTMT6plex [N-Term]	O43896 1xPhospho [S915]	0.000239438	0	1	1	5	O43896	O43896 [908-923]	0	2104.02	0	87.9	85.4	89.3	98.2	103.9	128.9		Not Found	Not Found	Not Found	Not Found	Not Found	Not Found	High	High	Not Found	Not Found	Not Found	High	0	5.513e-05	4.35
FALSE	High	[R].RPSVYLPTR.[E]	1xPhospho [S3]; 1xTMT6plex [N-Term]	Q9BW61 1xPhospho [S33]	0.00329347	0.000108793	1	1	5	Q9BW61	Q9BW61 [31-39]	0	1397.75	0	102.3	95.3	93.7	99.6	99.1	110.4		Not Found	Not Found	Not Found	Not Found	Not Found	High	High	High	Not Found	Not Found	Not Found	High	3.165e-05	0.0003373	3.38
FALSE	High	[R].RSSTSGDTEEEEEEEVVPFSSDEQKR.[R]	2xPhospho [T4; T8]; 1xTMT6plex [K25]; 1xTMT6plex [N-Term]	O15231 2xPhospho [T154; T158]	1.66927e-06	0	1	1	2	O15231	O15231 [151-176]	2	3604.56	0	89.5	94.3	108	125.9	105.8	86.3		Not Found	Not Found	Not Found	Not Found	Not Found	Not Found	Not Found	Not Found	Not Found	Not Found	High	High	0	2.089e-07	7.26
FALSE	High	[R].RSSTSGDTEEEEEEEVVPFSSDEQKR.[R]	1xPhospho [S/T]; 1xTMT6plex [K25]; 1xTMT6plex [N-Term]	O15231 1xPhospho [S/T]	3.07151e-09	0	1	1	9	O15231	O15231 [151-176]	2	3524.6	0	90.4	88.6	96.7	116.5	112	94.7		High	Not Found	High	Not Found	Not Found	Not Found	Not Found	Not Found	Not Found	Not Found	High	High	0	6.083e-10	8
FALSE	High	[R].RSSTSGDTEEEEEEEVVPFSSDEQK.[R]	2xPhospho [T/S]; 1xTMT6plex [K25]; 1xTMT6plex [N-Term]	O15231 2xPhospho [T/S]	4.46703e-08	0	1	1	24	O15231	O15231 [151-175]	1	3448.46	0	104.5	105.2	108	89.2	100.7	98.1		High	High	High	Not Found	Not Found	Not Found	Not Found	Not Found	Not Found	Not Found	High	High	0	9.269e-09	7.83
FALSE	High	[K].MLGEDSDEEEEMDTSER.[K]	1xPhospho [S6]; 1xTMT6plex [N-Term]	Q9BWU0 1xPhospho [S312]	4.77389e-06	0	1	1	3	Q9BWU0	Q9BWU0 [307-323]	0	2310.88	0	85.7	96.7	102.3	91.4	99.8	137.2		High	Not Found	Not Found	Not Found	Not Found	Not Found	Not Found	Not Found	Not Found	Not Found	High	High	0	5.521e-07	4.52
FALSE	High	[K].MIGFPSSAGSVSPR.[S]	1xPhospho [S]; 1xTMT6plex [N-Term]	P13646 1xPhospho [S]	0.00789521	0.000108793	1	1	11	P13646	P13646 [416-429]	0	1701.82	0	203.7	59.1	303.9	51.7	56.3	47.4		Not Found	Not Found	Not Found	Not Found	Not Found	Not Found	Not Found	High	High	Not Found	Not Found	High	0.0001658	0.002102	3.27
FALSE	High	[K].MIGFPSSAGSVSPR.[S]	1xPhospho [S]; 1xOxidation [M1]; 1xTMT6plex [N-Term]	P13646 1xPhospho [S]	0.19423	0.00796737	1	1	2	P13646	P13646 [416-429]	0	1717.82	0	351.6	84.2	137.4	57.3	63.1	44.7		Not Found	Not Found	Not Found	Not Found	Not Found	Not Found	High	Not Found	Not Found	Not Found	Not Found	High	0.003142	0.04661	2.35
FALSE	High	[R].RSSTSGDTEEEEEEEVVPFSSDEQK.[R]	1xPhospho [S/T]; 1xTMT6plex [K25]; 1xTMT6plex [N-Term]	O15231 1xPhospho [S/T]	1.85977e-10	0	1	1	66	O15231	O15231 [151-175]	1	3368.49	0	99.8	101.9	103.6	103.1	103	85.5		High	High	High	Not Found	Not Found	Not Found	Not Found	Not Found	Not Found	Not Found	High	High	0	9.319e-11	7.94
FALSE	High	[K].RSSTLSQLPGDK.[S]	1xPhospho [S/T]; 1xTMT6plex [K12]; 1xTMT6plex [N-Term]	O60271 1xPhospho [S/T]	0.179155	0.00689042	1	1	2	O60271	O60271 [592-603]	1	1826.98	0	88.1	104	90.2	116.2	105.4	83.1		Not Found	Not Found	Not Found	Not Found	Not Found	High	Not Found	Not Found	Not Found	Not Found	Not Found	High	0.006525	0.1034	2.72
FALSE	High	[R].RSSTATPGVTSGPSASGTPPSEGGGGSFPR.[I]	1xPhospho [S]; 1xTMT6plex [N-Term]	O15211 1xPhospho [S]	0.0205481	0.000295797	1	1	2	O15211	O15211 [735-764]	1	3055.43	0	79.8	105.9	67.1	133.5	96.1	109.2		Not Found	Not Found	Not Found	Not Found	High	Not Found	Not Found	Not Found	Not Found	Not Found	Not Found	High	0.000144	0.001455	2.86
FALSE	High	[R].RSSSPSLNSGK.[E]	1xPhospho [S]; 1xTMT6plex [K11]; 1xTMT6plex [N-Term]	Q9P241 1xPhospho [S]	0.000106545	0	1	1	2	Q9P241	Q9P241 [636-646]	1	1657.87	0	95.8	96.5	87.6	105.8	104.9	102.3		Not Found	Not Found	Not Found	Not Found	Not Found	High	Not Found	Not Found	Not Found	Not Found	Not Found	High	0	1.437e-05	3.53
FALSE	High	[-].MIPLEKPGSGGSSPGATSGSGR.[A]	1xPhospho [S]; 1xTMT6plex [K6]; 1xTMT6plex [N-Term]	Q9UEE5 1xPhospho [S]	0.000108706	0	1	1	3	Q9UEE5	Q9UEE5 [1-22]	0	2568.29	0	99.9	110.7	104.4	84.6	88.3	81.7		Not Found	Not Found	Not Found	Not Found	Not Found	Not Found	Not Found	High	Not Found	Not Found	Not Found	High	0	9.889e-06	3.6
FALSE	High	[R].RSSSEGLSK.[G]	1xPhospho [S]; 1xTMT6plex [K9]; 1xTMT6plex [N-Term]	Q86V48 1xPhospho [S]	0.0155586	0.000295797	1	1	2	Q86V48	Q86V48 [572-580]	1	1488.78	0	102.8	98.3	89.7	110.7	79.9	106.1		Not Found	Not Found	Not Found	Not Found	High	Not Found	Not Found	Not Found	Not Found	Not Found	Not Found	High	0.000144	0.00102	3.5
FALSE	High	[R].RSSSDEQGLSYSSLK.[N]	1xPhospho [S]; 1xTMT6plex [K15]; 1xTMT6plex [N-Term]	Q9NPH3 1xPhospho [S]	7.73143e-07	0	1	1	5	Q9NPH3	Q9NPH3 [554-568]	1	2182.08	0	92.9	108.9	84.1	126.5	94.1	90.8		Not Found	Not Found	Not Found	Not Found	High	High	Not Found	Not Found	Not Found	Not Found	Not Found	High	0	1.018e-07	5.6
FALSE	High	[R].MLQAISPK.[Q]	1xPhospho [S6]; 1xTMT6plex [K8]; 1xTMT6plex [N-Term]	P49585 1xPhospho [S315]	0.00407831	0.000108793	1	2	40	P49585	P49585 [310-317]	0	1425.79	0	96.6	116.4	97.4	121.1	93.4	70.1		Not Found	Not Found	Not Found	Not Found	Not Found	Not Found	High	High	High	Not Found	Not Found	High	9.162e-05	0.0007169	3.26
FALSE	High	[R].RSSQPSPTAVPASDSPPTKQEVK.[K]	2xPhospho [S/T]; 2xTMT6plex [K19; K23]; 1xTMT6plex [N-Term]	Q3KQU3 2xPhospho [S/T]	0.0109412	0.000209539	1	1	2	Q3KQU3	Q3KQU3 [111-133]	2	3241.65	0	81.9	117.3	103.8	125.7	91.2	89.5		Not Found	Not Found	Not Found	Not Found	High	Not Found	Not Found	Not Found	Not Found	Not Found	Not Found	High	6.142e-05	0.0006684	3.76
FALSE	High	[R].RSSQPSPTAVPASDSPPTK.[Q]	2xPhospho [S3; S6]; 1xTMT6plex [K19]; 1xTMT6plex [N-Term]	Q3KQU3 2xPhospho [S113; S116]	9.83231e-05	0	1	1	6	Q3KQU3	Q3KQU3 [111-129]	1	2528.22	0	95.4	100	94.8	95.8	100.1	90.1		Not Found	High	High	High	High	Not Found	Not Found	Not Found	Not Found	Not Found	Not Found	High	0	9.015e-06	4.59
FALSE	High	[R].RSSQPSPTAVPASDSPPTK.[Q]	1xPhospho [S/T]; 1xTMT6plex [K19]; 1xTMT6plex [N-Term]	Q3KQU3 1xPhospho [S]	9.07861e-07	0	1	1	24	Q3KQU3	Q3KQU3 [111-129]	1	2448.25	0	94.2	99.4	99.3	97.6	92.1	94.6		Not Found	Not Found	Not Found	Not Found	High	High	High	High	High	Not Found	Not Found	High	0	1.462e-07	5.96
FALSE	High	[R].RSSPVPPVPER.[R]	1xPhospho [S3]; 1xTMT6plex [N-Term]	Q6ZRV2 1xPhospho [S925]	0.00418871	0.000108793	1	1	2	Q6ZRV2	Q6ZRV2 [923-933]	1	1529.8	0	110.7	114.5	91.2	105.3	86.4	85.8		Not Found	High	High	Not Found	Not Found	Not Found	Not Found	Not Found	Not Found	Not Found	Not Found	High	3.165e-05	0.0002858	3.47
FALSE	High	[R].MLQAISPK.[Q]	1xPhospho [S6]; 1xOxidation [M1]; 1xTMT6plex [K8]; 1xTMT6plex [N-Term]	P49585 1xPhospho [S315]	0.00964169	0.000209539	1	2	30	P49585	P49585 [310-317]	0	1441.79	0	104.1	112.2	102.7	112.4	91.2	83.9		Not Found	Not Found	Not Found	Not Found	Not Found	High	High	High	High	Not Found	Not Found	High	6.142e-05	0.0006056	3.23
FALSE	High	[R].MLSLTQEPGEGQDMQK.[L]	1xPhospho [S/T]; 1xTMT6plex [K16]; 1xTMT6plex [N-Term]	Q9H5I5 1xPhospho [S/T]	0.102414	0.00287063	1	1	2	Q9H5I5	Q9H5I5 [1498-1513]	0	2330.12	0	108.8	118.9	101.2	109.2	87.4	83.4		Not Found	Not Found	Not Found	Not Found	High	Not Found	Not Found	Not Found	Not Found	Not Found	Not Found	High	0.001042	0.01744	3.36
FALSE	High	[R].RSSPSARPPDVPGQQPQAAK.[S]	1xPhospho [S]; 1xTMT6plex [K20]; 1xTMT6plex [N-Term]	Q96JP5 1xPhospho [S]	2.19634e-06	0	1	1	7	Q96JP5	Q96JP5 [81-100]	1	2612.37	0	99.2	91.1	101	94.8	104.7	109.5		Not Found	Not Found	Not Found	Not Found	Not Found	High	High	High	Not Found	Not Found	Not Found	High	0	2.68e-07	5.36
FALSE	High	[R].MLSSSDAITQEFMDLR.[T]	1xPhospho [S]; 1xTMT6plex [N-Term]	Q9UPN3 1xPhospho [S]	5.24137e-05	0	1	1	2	Q9UPN3	Q9UPN3 [1374-1389]	0	2152.99	0	93.1	98.8	94.3	102.1	102.3	89.6		Not Found	Not Found	Not Found	Not Found	Not Found	High	Not Found	Not Found	Not Found	Not Found	Not Found	High	0	9.81e-06	4.12
FALSE	High	[R].RSSPPPPPSGSSSR.[T]	1xPhospho [S]; 1xTMT6plex [N-Term]	Q5VUA4 1xPhospho [S]	1.03789e-06	0	1	1	12	Q5VUA4	Q5VUA4 [38-51]	1	1704.83	0	101.2	91.1	88.4	101	85.8	162.9		Not Found	High	High	Not Found	High	High	High	High	Not Found	Not Found	Not Found	High	0	1.345e-07	4.04
FALSE	High	[R].MLSSTPPTPIACAPSAVNQAAPHQQNR.[I]	1xCarbamidomethyl [C12]; 1xPhospho [S/T]; 1xTMT6plex [N-Term]	O75376 1xPhospho [T/S]	7.68174e-08	0	1	1	2	O75376	O75376 [2392-2418]	0	3153.52	0	103	87.6	103.1	109.9	105.8	112.5		Not Found	Not Found	Not Found	Not Found	Not Found	Not Found	High	Not Found	Not Found	Not Found	Not Found	High	0	1.198e-08	4.71
FALSE	High	[R].RSSPPGHYYQK.[S]	1xPhospho [S]; 1xTMT6plex [K11]; 1xTMT6plex [N-Term]	Q9NX40 1xPhospho [S]	6.80455e-05	0	1	1	19	Q9NX40	Q9NX40 [121-131]	1	1857.94	0	94	83.1	93.2	96.2	109.2	114.9		Not Found	Not Found	Not Found	Not Found	Not Found	High	High	High	Not Found	Not Found	Not Found	High	0	6.437e-06	4.79
FALSE	High	[K].RSSLYGIAK.[V]	1xPhospho [S]; 1xTMT6plex [K9]; 1xTMT6plex [N-Term]	Q5VZ89 1xPhospho [S]	0.000865032	0	1	1	5	Q5VZ89	Q5VZ89 [1182-1190]	1	1532.86	0	88.1	87.9	101.9	110.7	111.2	91		Not Found	Not Found	Not Found	Not Found	Not Found	Not Found	High	High	Not Found	Not Found	Not Found	High	3.165e-05	9.007e-05	3.3
FALSE	High	[K].MISTPSPK.[K]	1xPhospho [S6]; 1xTMT6plex [K8]; 1xTMT6plex [N-Term]	Q53F19 1xPhospho [S415]	0.095658	0.00260894	1	1	1	Q53F19	Q53F19 [410-417]	0	1398.75	0	93.5	116.8	92.5	109.5	89.5	77.5		Not Found	Not Found	Not Found	Not Found	Not Found	Not Found	High	Not Found	Not Found	Not Found	Not Found	High	0.0009733	0.01555	2.33
FALSE	High	[R].RSSTSSEPTPTVK.[T]	1xPhospho [S/T]; 1xTMT6plex [K13]; 1xTMT6plex [N-Term]	Q69YQ0 1xPhospho [S/T]	9.63688e-05	0	1	1	21	Q69YQ0	Q69YQ0 [830-842]	1	1914.99	0	99.6	96.4	100.8	102.8	104.8	100.4		Not Found	Not Found	Not Found	Not Found	High	High	High	High	High	Not Found	Not Found	High	0	8.862e-06	4.55
FALSE	High	[K].MIFEGPNKLSPR.[I]	1xPhospho [S10]; 1xTMT6plex [K8]; 1xTMT6plex [N-Term]	O94913 1xPhospho [S777]	0.0109412	0.000209539	1	1	2	O94913	O94913 [768-779]	1	1927.03	0	98.9	95.6	114.4	95.9	106.8	92.3		Not Found	Not Found	Not Found	Not Found	Not Found	Not Found	Not Found	High	Not Found	Not Found	Not Found	High	6.142e-05	0.0006673	3.12
FALSE	High	[K].SDISPLTPR.[E]	1xPhospho [T/S]; 1xTMT6plex [N-Term]	P46821 1xPhospho [T/S]	0.00407831	0.000108793	1	1	22	P46821	P46821 [1782-1790]	0	1294.66	0	97.2	90.6	102.9	96.5	100.7	99.2		High	High	High	High	Not Found	Not Found	Not Found	Not Found	Not Found	Not Found	High	High	0.0001195	0.0008441	3
FALSE	High	[R].RSSVFAAEIMDAFDR.[S]	1xPhospho [S3]; 1xTMT6plex [N-Term]	Q9UMX3 1xPhospho [S8]	0.000150891	0	1	1	1	Q9UMX3	Q9UMX3 [6-20]	1	2023.95	0	97.3	96	101.3	108.4	103.3	99.3		Not Found	Not Found	Not Found	Not Found	Not Found	High	Not Found	Not Found	Not Found	Not Found	Not Found	High	0	1.334e-05	4.35
FALSE	High	[R].RVSEVEEEKEPVPQPLPSDDTR.[V]	1xPhospho [S3]; 1xTMT6plex [K9]; 1xTMT6plex [N-Term]	O43290 1xPhospho [S448]	3.13227e-07	0	1	1	8	O43290	O43290 [446-467]	2	3074.54	0	104.8	117.4	109.4	82.9	92.9	88.3		High	High	High	Not Found	Not Found	Not Found	Not Found	Not Found	Not Found	Not Found	High	High	0	5.727e-08	6.27
FALSE	High	[R].RVSADSQPFQHGDK.[V]	1xPhospho [S3]; 1xTMT6plex [K14]; 1xTMT6plex [N-Term]	Q96AX9 1xPhospho [S309]	2.36353e-05	0	1	1	1	Q96AX9	Q96AX9 [307-320]	1	2110.05	0	95.1	98.2	98.3	104.2	101.3	93.2		Not Found	Not Found	Not Found	Not Found	High	Not Found	Not Found	Not Found	Not Found	Not Found	Not Found	High	0	2.423e-06	4.75
FALSE	High	[K].RVPSPTPAPK.[E]	1xPhospho [S/T]; 1xTMT6plex [K10]; 1xTMT6plex [N-Term]	Q9UQ35 1xPhospho [S/T]	0.000579088	0	1	1	23	Q9UQ35	Q9UQ35 [2578-2587]	1	1587.9	0	99.4	88.3	104	94.9	109.2	112.4		Not Found	Not Found	Not Found	Not Found	Not Found	High	High	High	High	Not Found	Not Found	High	0.000144	0.001406	3.4
FALSE	High	[R].RVPPPALSR.[D]	1xPhospho [S8]; 1xTMT6plex [N-Term]	Q14152 1xPhospho [S1336]	0.0130923	0.000209539	1	1	2	Q14152	Q14152 [1329-1337]	1	1301.73	0	87.9	102.8	93.3	91.3	109.9	116		Not Found	Not Found	Not Found	Not Found	High	High	Not Found	Not Found	Not Found	Not Found	Not Found	High	0.0004359	0.006937	2.79
FALSE	High	[K].RVEVVEEDGPSEK.[S]	1xTMT6plex [K13]; 1xTMT6plex [N-Term]		5.03507e-05	0	1	1	1	O15231	O15231 [218-230]	1	1931.05	0	101.6	84.9	101.1	87.2	111.7	123.3		Not Found	Not Found	Not Found	Not Found	Not Found	Not Found	Not Found	Not Found	Not Found	High	Not Found	High	0	4.887e-06	3.8
FALSE	High	[R].RVESEESGDEEGKK.[H]	2xPhospho [S4; S7]; 2xTMT6plex [K13; K14]; 1xTMT6plex [N-Term]	Q15435 2xPhospho [S24; S27]	0.211541	0.00943441	1	1	1	Q15435	Q15435 [21-34]	2	2426.15	0	103.4	122.5	86.6	133.4	79.7	75		Not Found	Not Found	High	Not Found	Not Found	Not Found	Not Found	Not Found	Not Found	Not Found	Not Found	High	0.003741	0.05259	2.08
FALSE	High	[R].RVEIMEEESEQ.[-]	1xTMT6plex [N-Term]		0.181246	0.00697215	1	1	1	P54578	P54578 [484-494]	1	1607.78	0	99.5	92.2	85.8	85.1	106.6	134.4		Not Found	Not Found	Not Found	Not Found	Not Found	Not Found	Not Found	Not Found	Not Found	High	Not Found	High	0.002794	0.0426	2.55
FALSE	High	[R].MGSSPLEVPKPR.[S]	1xPhospho [S]; 1xTMT6plex [K10]; 1xTMT6plex [N-Term]	Q8NCE2 1xPhospho [S]	0.000212267	0	1	1	2	Q8NCE2	Q8NCE2 [527-538]	0	1835.99	0	108.8	108.6	95.1	104.6	85.3	74.3		Not Found	Not Found	Not Found	Not Found	Not Found	Not Found	High	Not Found	Not Found	Not Found	Not Found	High	0	1.82e-05	3.97
FALSE	High	[R].MKEPSSPPPAPTSSTFGLQDGNLR.[A]	1xPhospho [S]; 1xTMT6plex [K2]; 1xTMT6plex [N-Term]	Q9BRQ6 1xPhospho [S]	0.000152924	0	1	1	2	Q9BRQ6	Q9BRQ6 [38-61]	1	3052.52	0	90.6	93.6	104.2	96.5	103.8	118.1		Not Found	Not Found	Not Found	Not Found	Not Found	Not Found	High	Not Found	Not Found	Not Found	Not Found	High	0	1.354e-05	3.62
FALSE	High	[K].RTSPQVLGSILK.[S]	1xPhospho [T/S]; 1xTMT6plex [K12]; 1xTMT6plex [N-Term]	Q7Z417 1xPhospho [T/S]	3.75266e-07	0	1	1	10	Q7Z417	Q7Z417 [570-581]	1	1837.07	0	93.4	87.6	105.5	91.7	106.1	119.3		Not Found	Not Found	Not Found	Not Found	Not Found	Not Found	Not Found	High	Not Found	Not Found	Not Found	High	0	5.221e-08	4.91
FALSE	High	[R].RTSNERPGSGQGQGR.[D]	1xPhospho [S3]; 1xTMT6plex [N-Term]	Q8TAD8 1xPhospho [S153]	0.0144635	0.000209539	1	1	1	Q8TAD8	Q8TAD8 [151-165]	1	1895.9	0	96.9	82.9	93.4	86.6	97.4	122.7		Not Found	Not Found	Not Found	Not Found	Not Found	Not Found	Not Found	Not Found	Not Found	Not Found	High	High	0.0001195	0.00093	3.29
FALSE	High	[R].MKSSSSVTTSETQPCTPSSSDYSDLQR.[V]	1xCarbamidomethyl [C15]; 1xPhospho [S]; 1xTMT6plex [K2]; 1xTMT6plex [N-Term]	P50552 1xPhospho [S]	0.000184439	0	1	1	5	P50552	P50552 [320-346]	1	3504.59	0	105	113.8	101.8	104.1	86.5	80.9		Not Found	Not Found	Not Found	Not Found	High	High	Not Found	Not Found	Not Found	Not Found	Not Found	High	0	1.598e-05	5.23
FALSE	High	[R].RTSMGGTQQQFVEGVR.[M]	1xPhospho [T/S]; 1xOxidation [M4]; 1xTMT6plex [N-Term]	P35222 1xPhospho [S/T]	3.2817e-06	0	1	1	14	P35222	P35222 [550-565]	1	2106	0	94.5	96.4	103.8	108.2	99.9	102.7		Not Found	Not Found	Not Found	High	High	High	High	High	Not Found	Not Found	Not Found	High	0	8.174e-06	4.48
FALSE	High	[R].RSSLVITTK.[IL]	1xPhospho [S3]; 1xTMT6plex [K9]; 1xTMT6plex [N-Term]	Q14722 1xPhospho [S164]	0.0236046	0.000295797	1	2	1	Q14722	Q14722 [162-170]	1	1542.9	0	100.7	97.8	95.4	112.6	104.3	94.3		Not Found	Not Found	Not Found	Not Found	Not Found	Not Found	High	Not Found	Not Found	Not Found	Not Found	High	0.0001658	0.001742	2.37
FALSE	High	[R].RTSMGGTQQQFVEGVR.[M]	1xPhospho [S/T]; 1xTMT6plex [N-Term]	P35222 1xPhospho [S/T]	2.18276e-08	0	1	1	12	P35222	P35222 [550-565]	1	2090.01	0	92.2	100.2	93.1	106.9	100.8	106.7		Not Found	Not Found	Not Found	Not Found	High	High	High	High	Not Found	Not Found	Not Found	High	0	1.001e-08	6.28
FALSE	High	[R].RTSIHDFLTK.[D]	1xPhospho [S/T]; 1xTMT6plex [K10]; 1xTMT6plex [N-Term]	Q3V6T2 1xPhospho [S/T]	0.000461278	0	1	1	10	Q3V6T2	Q3V6T2 [1818-1827]	1	1755.96	0	94.3	91.1	93.2	103.6	108.7	107.7		Not Found	Not Found	Not Found	Not Found	Not Found	Not Found	High	High	Not Found	Not Found	Not Found	High	0	3.649e-05	4.17
FALSE	High	[R].RTSFYLPK.[D]	1xPhospho [S/T]; 1xTMT6plex [K8]; 1xTMT6plex [N-Term]	Q9NS23 1xPhospho [S/T]	0.0547778	0.0010351	1	1	2	Q9NS23	Q9NS23 [205-212]	1	1549.85	0	100.3	90.5	86	77.3	93.6	77.1		Not Found	Not Found	Not Found	Not Found	Not Found	Not Found	Not Found	High	Not Found	Not Found	Not Found	High	0.0003628	0.006295	2.89
FALSE	High	[R].RTSFSTSDVSK.[L]	1xPhospho [T/S]; 1xTMT6plex [K11]; 1xTMT6plex [N-Term]	Q13459 1xPhospho [S/T]	0.000188179	0	1	1	6	Q13459	Q13459 [1352-1362]	1	1752.89	0	95.3	96.8	97.2	102.1	101.1	90.7		Not Found	Not Found	Not Found	Not Found	Not Found	High	High	Not Found	Not Found	Not Found	Not Found	High	0	1.631e-05	3.94
FALSE	High	[R].RTSFSFQK.[E]	1xPhospho [S3]; 1xTMT6plex [K8]; 1xTMT6plex [N-Term]	Q9BPZ7 1xPhospho [S510]	0.0537302	0.0010351	1	1	1	Q9BPZ7	Q9BPZ7 [508-515]	1	1538.81	0	95.3	90.7	85.1	100.8	96.5	111.2		Not Found	Not Found	Not Found	Not Found	Not Found	Not Found	Not Found	High	Not Found	Not Found	Not Found	High	0.0003628	0.006096	2.82
FALSE	High	[R].RTSETSISPPGSSIGSPNR.[V]	2xPhospho [S/T]; 1xTMT6plex [N-Term]	O94929 2xPhospho [S/T]	1.44072e-06	0	1	1	4	O94929	O94929 [275-293]	1	2319.06	0	100.7	104.4	96.3	96.3	108.6	91.5		Not Found	High	High	Not Found	Not Found	Not Found	Not Found	Not Found	Not Found	Not Found	High	High	0	2.895e-07	5.76
FALSE	High	[R].RTSETSISPPGSSIGSPNR.[V]	1xPhospho [T/S]; 1xTMT6plex [N-Term]	O94929 1xPhospho [T/S]	6.15463e-05	0	1	1	8	O94929	O94929 [275-293]	1	2239.09	0	89.7	98.5	97.8	119.8	93.4	88.6		Not Found	Not Found	Not Found	Not Found	High	High	High	High	Not Found	Not Found	Not Found	High	0	2.399e-05	3.58
FALSE	High	[R].RTPTMPQEEAAACPPHILPPEK.[R]	1xCarbamidomethyl [C13]; 1xPhospho [T2]; 1xTMT6plex [K22]; 1xTMT6plex [N-Term]	Q9NYV4 1xPhospho [T1244]	0.000736754	0	1	1	1	Q9NYV4	Q9NYV4 [1243-1264]	1	3008.51	0	110.9	121.5	88.2	118.5	103.6	62.1		Not Found	Not Found	Not Found	Not Found	Not Found	High	Not Found	Not Found	Not Found	Not Found	Not Found	High	0	5.452e-05	3.74
FALSE	High	[K].MLDAEDIVGTARPDEK.[A]	1xTMT6plex [K16]; 1xTMT6plex [N-Term]		2.39538e-05	0	1	1	1	P12814	P12814 [221-236]	0	2218.18	0	101.4	96.5	94.7	99.1	101.7	94.8		Not Found	Not Found	Not Found	Not Found	Not Found	Not Found	Not Found	Not Found	Not Found	High	Not Found	High	0	2.457e-06	4.13
FALSE	High	[R].RTDALTSSPGR.[D]	1xPhospho [S/T]; 1xTMT6plex [N-Term]	P49736 1xPhospho [T/S]	0.00394437	0.000108793	1	1	9	P49736	P49736 [34-44]	1	1469.73	0	93.7	93.6	93.1	90.8	102.4	132.8		Not Found	High	High	High	High	Not Found	Not Found	Not Found	Not Found	Not Found	Not Found	High	3.165e-05	0.000226	3.33
FALSE	High	[R].RSYDVPPPPMEPDHPFYSNISK.[D]	1xPhospho [S/Y]; 1xOxidation [M10]; 1xTMT6plex [K22]; 1xTMT6plex [N-Term]	P18669 1xPhospho [S/Y]	1.29505e-08	0	1	2	2	P18669	P18669 [117-138]	1	3127.5	0	89.5	93.2	97.9	104.1	112.4	95.9		Not Found	Not Found	Not Found	Not Found	Not Found	High	Not Found	Not Found	Not Found	Not Found	Not Found	High	0	2.306e-09	6.32
FALSE	High	[R].RSYDVPPPPMEPDHPFYSNISK.[D]	1xPhospho [Y/S]; 1xTMT6plex [K22]; 1xTMT6plex [N-Term]	P18669 1xPhospho [S/Y]	1.92211e-08	0	1	2	4	P18669	P18669 [117-138]	1	3111.51	0	89	89.6	93.4	99	96.4	122.4		Not Found	Not Found	Not Found	Not Found	Not Found	High	High	Not Found	Not Found	Not Found	Not Found	High	0	3.319e-09	6.82
FALSE	High	[R].RSTQGVTLTDLQEAEK.[T]	1xPhospho [T/S]; 1xTMT6plex [K16]; 1xTMT6plex [N-Term]	O14974 1xPhospho [T/S]	0.000712523	0	1	1	2	O14974	O14974 [694-709]	1	2314.21	0	97.7	95.7	98.3	104.2	115.9	117.3		Not Found	Not Found	Not Found	Not Found	High	Not Found	Not Found	Not Found	Not Found	Not Found	Not Found	High	0	5.438e-05	4.66
FALSE	High	[R].RSTEPSVTPDLLNFK.[K]	1xPhospho [S/T]; 1xTMT6plex [K15]; 1xTMT6plex [N-Term]	Q6WCQ1 1xPhospho [T/S]	1.68005e-05	0	1	1	2	Q6WCQ1	Q6WCQ1 [376-390]	1	2242.19	0	79.6	89	77.1	100.1	120.2	98.3		Not Found	Not Found	Not Found	Not Found	Not Found	Not Found	High	Not Found	Not Found	Not Found	Not Found	High	0	1.774e-06	5.2
FALSE	High	[R].RTSLPCIPR.[E]	1xCarbamidomethyl [C6]; 1xPhospho [S/T]; 1xTMT6plex [N-Term]	Q14432 1xPhospho [S/T]	0.0049496	0.000108793	1	1	3	Q14432	Q14432 [310-318]	1	1408.73	0	96.5	97.8	89.9	102	109.4	110		Not Found	Not Found	Not Found	Not Found	Not Found	High	Not Found	High	Not Found	Not Found	Not Found	High	3.165e-05	0.0002825	3.13
FALSE	High	[R].RPSVGSQSNQAGQGK.[R]	1xPhospho [S3]; 1xTMT6plex [K15]; 1xTMT6plex [N-Term]	Q9UPP1 1xPhospho [S1021]	0.000257726	0	1	1	1	Q9UPP1	Q9UPP1 [1019-1033]	0	2039.04	0	93.2	84.8	85.9	78.7	85.8	126.5		Not Found	Not Found	Not Found	Not Found	Not Found	High	Not Found	Not Found	Not Found	Not Found	Not Found	High	0	2.165e-05	4.23
FALSE	High	[R].MITNSLNHDSPPSTPPRRPDTSTSK.[I]	2xPhospho [S/T]; 1xTMT6plex [K25]; 1xTMT6plex [N-Term]	Q8N9M1 2xPhospho [S/T]	0.0210986	0.000295797	1	1	3	Q8N9M1	Q8N9M1 [142-166]	1	3354.6	0	82.8	98.4	104.4	116.3	104.1	91.3		Not Found	Not Found	Not Found	Not Found	Not Found	High	Not Found	Not Found	Not Found	Not Found	Not Found	High	0.002381	0.0374	2.66
FALSE	High	[R].RSSLLSLMTGK.[K]	1xPhospho [S3]; 1xOxidation [M8]; 1xTMT6plex [K11]; 1xTMT6plex [N-Term]	Q6WKZ4 1xPhospho [S435]	0.00228056	0.000108793	1	1	1	Q6WKZ4	Q6WKZ4 [433-443]	1	1746.96	0	110.6	94.9	122	103.4	102.4	79.7		Not Found	Not Found	Not Found	Not Found	Not Found	Not Found	Not Found	High	Not Found	Not Found	Not Found	High	3.165e-05	0.000138	3.57
FALSE	High	[K].RSFEVEEVETPNSTPPR.[R]	1xPhospho [S2]; 1xTMT6plex [N-Term]	Q9UHD8 1xPhospho [S30]	1.82235e-09	0	1	1	5	Q9UHD8	Q9UHD8 [29-45]	1	2283.09	0	97.3	87.5	101.8	90.3	109.6	121.1		High	Not Found	Not Found	Not Found	Not Found	Not Found	Not Found	Not Found	Not Found	Not Found	High	High	0	3.741e-10	6.63
FALSE	High	[R].RSEDEPPAASASAAPPPQRDEEEPDGVPEK.[G]	1xPhospho [S2]; 1xTMT6plex [K30]; 1xTMT6plex [N-Term]	Q96IZ0 1xPhospho [S108]	6.15638e-06	0	1	1	4	Q96IZ0	Q96IZ0 [107-136]	2	3696.74	0	100.9	94.4	104.2	103.1	104.3	87.6		High	High	High	Not Found	Not Found	Not Found	Not Found	Not Found	Not Found	Not Found	High	High	0	6.991e-07	5.14
FALSE	High	[K].MPFLSISSPK.[V]	1xPhospho [S]; 1xOxidation [M1]; 1xTMT6plex [K10]; 1xTMT6plex [N-Term]	Q09666 1xPhospho [S]	0.00964169	0.000209539	1	1	5	Q09666	Q09666 [3405-3414]	0	1660.88	0	91.4	95.1	88.9	102.4	101.9	92.8		Not Found	Not Found	Not Found	Not Found	Not Found	Not Found	Not Found	High	High	Not Found	Not Found	High	0.0001658	0.001978	2.57
FALSE	High	[R].RSDSASSEPVGIYQGFEK.[K]	1xPhospho [S]; 1xTMT6plex [K18]; 1xTMT6plex [N-Term]	Q05655 1xPhospho [S]	6.40679e-05	0	1	1	3	Q05655	Q05655 [301-318]	1	2495.22	0	82.7	93.3	89.8	106.4	108.6	114.1		Not Found	Not Found	Not Found	Not Found	High	High	Not Found	Not Found	Not Found	Not Found	Not Found	High	0	6.088e-06	5.63
FALSE	High	[K].MPFQTSPGGK.[A]	1xPhospho [S6]; 1xTMT6plex [K10]; 1xTMT6plex [N-Term]	P51608 1xPhospho [S229]	0.0219517	0.000295797	1	1	1	P51608	P51608 [224-233]	0	1587.8	0	109.6	97.6	93.3	102.5	112.2	107		Not Found	Not Found	Not Found	Not Found	Not Found	Not Found	High	Not Found	Not Found	Not Found	Not Found	High	0.0001658	0.001577	2.77
FALSE	High	[R].RRPSPQPSPR.[D]	2xPhospho [S4; S8]; 1xTMT6plex [N-Term]	Q9UQ35 2xPhospho [S2702; S2706]	0.0860225	0.0025315	1	1	1	Q9UQ35	Q9UQ35 [2699-2708]	1	1566.75	0	94	78.3	108.3	80.8	101.7	169.6		Not Found	Not Found	Not Found	Not Found	Not Found	Not Found	Not Found	Not Found	Not Found	Not Found	High	High	0.0009113	0.01312	2.98
FALSE	High	[K].MPLDLSPLATPIIR.[S]	1xPhospho [S6]; 1xTMT6plex [N-Term]	P15336 1xPhospho [S112]	4.20384e-06	0	1	1	2	P15336	P15336 [107-120]	0	1846.01	0	112.3	97.5	107.3	88.7	109.4	101.3		Not Found	Not Found	Not Found	Not Found	Not Found	Not Found	High	High	Not Found	Not Found	Not Found	High	0	4.907e-07	4.39
FALSE	High	[R].RRPSPQPSPR.[D]	1xPhospho [S4]; 1xTMT6plex [N-Term]	Q9UQ35 1xPhospho [S2702]	0.0763257	0.00210549	1	1	1	Q9UQ35	Q9UQ35 [2699-2708]	1	1486.78	0	87.3	67.6	91.8	100.1	110.8	132.7		Not Found	Not Found	Not Found	Not Found	Not Found	High	Not Found	Not Found	Not Found	Not Found	Not Found	High	0.0007236	0.01084	2.67
FALSE	High	[R].RRPSDENTIAPSEVQK.[W]	1xPhospho [S4]; 1xTMT6plex [K16]; 1xTMT6plex [N-Term]	Q86W92 1xPhospho [S794]	0.00202205	0.000108793	1	1	2	Q86W92	Q86W92 [791-806]	1	2365.23	0	98.4	90.4	100	102.6	90.3	99.6		Not Found	Not Found	Not Found	Not Found	High	High	Not Found	Not Found	Not Found	Not Found	Not Found	High	3.165e-05	0.0001249	3.98
FALSE	High	[K].RQSVSGLHR.[Y]	1xPhospho [S3]; 1xTMT6plex [N-Term]	Q8N1G4 1xPhospho [S431]	0.00361634	0.000108793	1	1	1	Q8N1G4	Q8N1G4 [429-437]	1	1348.7	0	79.6	86.3	107.6	84	135.4	97.4		Not Found	Not Found	Not Found	Not Found	High	Not Found	Not Found	Not Found	Not Found	Not Found	Not Found	High	3.165e-05	0.0002075	3.15
FALSE	High	[R].RQSSPSCGPVAETSSIGNGDGISK.[L]	1xCarbamidomethyl [C7]; 1xPhospho [S3]; 1xTMT6plex [K24]; 1xTMT6plex [N-Term]	Q9Y4K4 1xPhospho [S433]	1.40266e-06	0	1	1	2	Q9Y4K4	Q9Y4K4 [431-454]	1	2929.41	0	92.8	100.6	97.3	113.7	98.1	94.3		Not Found	Not Found	Not Found	Not Found	High	Not Found	Not Found	Not Found	Not Found	Not Found	Not Found	High	0	1.773e-07	4.53
FALSE	High	[K].MPLVEQSPEDSEGQDYVETVIPSNR.[L]	1xPhospho [T/S]; 1xTMT6plex [N-Term]	Q9P2K8 1xPhospho [S/T]	0.0243958	0.000295797	1	1	4	Q9P2K8	Q9P2K8 [545-569]	0	3128.43	0	90.9	91.1	102.6	88.3	102.8	120.7		Not Found	Not Found	High	High	Not Found	Not Found	Not Found	Not Found	Not Found	Not Found	Not Found	High	0.005203	0.07861	2.7
FALSE	High	[R].RQSSGSATNVASTPDNR.[G]	2xPhospho [S4; S6]; 1xTMT6plex [N-Term]	Q7Z460 2xPhospho [S647; S649]	3.80127e-05	0	1	1	1	Q7Z460	Q7Z460 [644-660]	1	2136.93	0	95.2	88.6	87	93.3	97	166.6		Not Found	Not Found	Not Found	Not Found	Not Found	Not Found	Not Found	Not Found	Not Found	Not Found	High	High	0	3.751e-06	5.16
FALSE	High	[R].RQSSGSATNVASTPDNR.[G]	1xPhospho [S/T]; 1xTMT6plex [N-Term]	Q7Z460 1xPhospho [S/T]	4.65121e-09	0	1	1	14	Q7Z460	Q7Z460 [644-660]	1	2056.96	0	87.2	83.6	82.1	91.4	102.6	155.5		High	High	High	High	Not Found	High	High	High	Not Found	Not Found	High	High	0	8.93e-10	6.16
FALSE	High	[R].RQSPSPSTRPIR.[R]	2xPhospho [S3; S5]; 1xTMT6plex [N-Term]	Q8IYB3 2xPhospho [S713; S715]	0.160295	0.00556977	1	1	1	Q8IYB3	Q8IYB3 [711-722]	1	1770.86	0	104.6	86.1	107.7	73.5	100	160.6		Not Found	Not Found	High	Not Found	Not Found	Not Found	Not Found	Not Found	Not Found	Not Found	Not Found	High	0.002159	0.03566	3.52
FALSE	High	[K].RQSPLPPQKK.[K]	1xPhospho [S3]; 2xTMT6plex [K9; K10]; 1xTMT6plex [N-Term]	Q01105 1xPhospho [S7]	0.0317327	0.000389981	1	1	1	Q01105	Q01105 [5-14]	2	1946.16	0	89.8	83.1	107.6	125.8	112.1	104.2		Not Found	Not Found	Not Found	Not Found	Not Found	Not Found	Not Found	High	Not Found	Not Found	Not Found	High	0.0001904	0.002667	3.41
FALSE	High	[K].RQSPLPPQK.[K]	1xPhospho [S3]; 1xTMT6plex [K9]; 1xTMT6plex [N-Term]	Q01105 1xPhospho [S7]	0.000493194	0	1	1	15	Q01105	Q01105 [5-13]	1	1588.9	0	98.9	95.4	100.2	91.2	109.5	120.6		Not Found	Not Found	Not Found	Not Found	High	High	High	High	Not Found	Not Found	Not Found	High	0	3.87e-05	3.65
FALSE	High	[K].RQSLPASPR.[A]	1xPhospho [S3]; 1xTMT6plex [N-Term]	Q3KQU3 1xPhospho [S442]	0.164117	0.00589781	1	1	1	Q3KQU3	Q3KQU3 [440-448]	1	1320.7	0	82	84.3	83.9	78.4	94.5	122.7		Not Found	Not Found	Not Found	Not Found	High	Not Found	Not Found	Not Found	Not Found	Not Found	Not Found	High	0.002245	0.03667	2.63
FALSE	High	[R].RQSEDPSCPNER.[Y]	1xCarbamidomethyl [C8]; 1xPhospho [S3]; 1xTMT6plex [N-Term]	Q4KMQ2 1xPhospho [S256]	0.0103053	0.000209539	1	1	1	Q4KMQ2	Q4KMQ2 [254-265]	1	1783.76	0	102.2	85.5	97.9	92.4	113.1	153.8		Not Found	Not Found	Not Found	Not Found	Not Found	Not Found	Not Found	Not Found	Not Found	Not Found	High	High	6.142e-05	0.0006254	3.04
FALSE	High	[K].RQPSMSETMPLYTLCK.[E]	1xCarbamidomethyl [C15]; 1xPhospho [S4]; 1xOxidation [M5]; 1xTMT6plex [K16]; 1xTMT6plex [N-Term]	Q9Y5B0 1xPhospho [S839]	0.0181206	0.000295797	1	1	1	Q9Y5B0	Q9Y5B0 [836-851]	1	2496.21	0	90.4	74.5	92.4	93	124.3	128.9		Not Found	Not Found	Not Found	Not Found	Not Found	Not Found	High	Not Found	Not Found	Not Found	Not Found	High	0.000144	0.001231	2.73
FALSE	High	[R].RQDLEDSLQAQQYFADANEAESWMR.[E]	1xTMT6plex [N-Term]		2.19903e-11	0	1	1	1	Q13813	Q13813 [883-907]	1	3230.5	0	87.6	73.6	110.9	100.5	115.3	134.6		Not Found	Not Found	Not Found	Not Found	Not Found	Not Found	Not Found	Not Found	Not Found	High	Not Found	High	0	6.269e-12	6.33
FALSE	High	[K].RQDEDYDEQVEESLQDEDDNDVYILTK.[V]	1xTMT6plex [K27]; 1xTMT6plex [N-Term]		2.91067e-08	0	1	1	4	O00410	O00410 [815-841]	1	3761.76	0	85.9	87.1	96.2	95.3	103.1	132.2		Not Found	Not Found	Not Found	Not Found	Not Found	Not Found	Not Found	Not Found	Not Found	High	Not Found	High	0	4.881e-09	6.21
FALSE	High	[R].RPTETNPVTSNSDEECNETVK.[E]	1xCarbamidomethyl [C16]; 1xPhospho [S/T]; 1xTMT6plex [K21]; 1xTMT6plex [N-Term]	P46100 1xPhospho [S/T]	5.53256e-07	0	1	1	9	P46100	P46100 [666-686]	0	2945.36	0	99	94.9	94.7	99.9	110.3	116.9		Not Found	High	High	Not Found	Not Found	Not Found	Not Found	Not Found	Not Found	Not Found	High	High	0	7.467e-08	4.81
FALSE	High	[R].RPSYTLGMK.[S]	1xPhospho [S3]; 1xTMT6plex [K9]; 1xTMT6plex [N-Term]	O43166 1xPhospho [S1632]	0.00243818	0.000108793	1	1	8	O43166	O43166 [1630-1638]	0	1590.85	0	98.5	93	95.6	103	113.2	113.8		Not Found	Not Found	Not Found	Not Found	Not Found	Not Found	High	High	Not Found	Not Found	Not Found	High	3.165e-05	0.0001702	3.59
FALSE	High	[R].MPQDGSDDEDEEWPTLEK.[A]	1xPhospho [S6]; 1xTMT6plex [K18]; 1xTMT6plex [N-Term]	Q13895 1xPhospho [S98]	1.04486e-06	0	1	1	4	Q13895	Q13895 [93-110]	0	2659.15	0	100.7	103.8	103.1	98	96.5	70.3		Not Found	High	High	Not Found	High	Not Found	Not Found	Not Found	Not Found	Not Found	High	High	0	1.351e-07	5.05
FALSE	High	[R].RPSYLEWQAR.[L]	1xPhospho [S3]; 1xTMT6plex [N-Term]	Q96KS9 1xPhospho [S45]	0.000300605	0	1	1	1	Q96KS9	Q96KS9 [43-52]	0	1614.8	0	96.1	96.6	81.7	95.2	121.2	100.5		Not Found	Not Found	Not Found	Not Found	Not Found	High	Not Found	Not Found	Not Found	Not Found	Not Found	High	0	2.492e-05	4.31
FALSE	High	[R].MPQDGSDDEDEEWPTLEK.[A]	1xPhospho [S6]; 1xOxidation [M1]; 1xTMT6plex [K18]; 1xTMT6plex [N-Term]	Q13895 1xPhospho [S98]	0.0159768	0.000295797	1	1	2	Q13895	Q13895 [93-110]	0	2675.15	0	109.6	95.1	96.1	94.9	106.1	89.2		Not Found	Not Found	High	Not Found	Not Found	Not Found	Not Found	Not Found	Not Found	Not Found	High	High	0.0001658	0.001761	2.88
FALSE	High	[R].RSLTNSHLEK.[K]	1xPhospho [S2]; 1xTMT6plex [K10]; 1xTMT6plex [N-Term]	Q9H2H9 1xPhospho [S52]	6.23756e-05	0	1	1	3	Q9H2H9	Q9H2H9 [51-60]	1	1722.93	0	100.8	90.7	94.5	117.5	104.6	92.1		Not Found	Not Found	Not Found	Not Found	Not Found	High	Not Found	High	Not Found	Not Found	Not Found	High	0	6.63e-06	4.39
FALSE	High	[R].RSPASIDR.[Q]	1xPhospho [S2]; 1xTMT6plex [N-Term]	O43166 1xPhospho [S1181]	0.0915754	0.0025315	1	1	3	O43166	O43166 [1180-1187]	1	1210.61	0	100.3	80.1	93.2	96.4	109.1	131.3		Not Found	High	High	Not Found	Not Found	Not Found	Not Found	Not Found	Not Found	Not Found	High	High	0.00406	0.05565	2.56
FALSE	High	[R].RSPERPTGDLR.[E]	1xPhospho [S2]; 1xTMT6plex [N-Term]	Q5T200 1xPhospho [S77]	0.0533853	0.0010351	1	1	3	Q5T200	Q5T200 [76-86]	1	1592.81	0	99.7	79.8	104.2	85.2	106.9	137.4		Not Found	High	High	Not Found	Not Found	Not Found	Not Found	Not Found	Not Found	Not Found	High	High	0.0003628	0.006055	3.42
FALSE	High	[R].RSPILLPK.[G]	1xPhospho [S2]; 1xTMT6plex [K8]; 1xTMT6plex [N-Term]	Q8TD16 1xPhospho [S582]	0.0309114	0.000389981	1	1	5	Q8TD16	Q8TD16 [581-588]	1	1461.9	0	94.1	93.2	102.5	96.7	104.7	83.3		Not Found	Not Found	Not Found	Not Found	Not Found	Not Found	High	High	Not Found	Not Found	Not Found	High	0.0001904	0.002572	2.84
FALSE	High	[R].RSSLLNAK.[K]	1xPhospho [S3]; 1xTMT6plex [K8]; 1xTMT6plex [N-Term]	Q8TEU7 1xPhospho [S1094]	0.00165463	0.000108793	1	1	2	Q8TEU7	Q8TEU7 [1092-1099]	1	1426.82	0	97.8	101.7	96.3	107.1	95.1	93.5		Not Found	Not Found	Not Found	Not Found	Not Found	Not Found	High	Not Found	Not Found	Not Found	Not Found	High	3.165e-05	0.0001059	3.47
FALSE	High	[R].RSSFLNAK.[K]	1xPhospho [S]; 1xTMT6plex [K8]; 1xTMT6plex [N-Term]	Q9Y4G8 1xPhospho [S]	0.0093883	0.000209539	1	1	3	Q9Y4G8	Q9Y4G8 [958-965]	1	1460.8	0	103.7	98.7	103.5	107.3	96	90.9		Not Found	Not Found	Not Found	Not Found	Not Found	Not Found	High	High	Not Found	Not Found	Not Found	High	6.142e-05	0.0005614	2.98
FALSE	High	[R].RSSDSWEVWGSASTNR.[N]	1xPhospho [S]; 1xTMT6plex [N-Term]	Q8N6T3 1xPhospho [S]	0.00690965	0.000108793	1	1	2	Q8N6T3	Q8N6T3 [359-374]	1	2133.96	0	79.7	106.9	97.7	130.5	98.9	77		Not Found	Not Found	Not Found	Not Found	Not Found	High	Not Found	Not Found	Not Found	Not Found	Not Found	High	6.142e-05	0.0005222	3.44
FALSE	High	[K].MLVLDEADEMLNK.[G]	1xTMT6plex [K13]; 1xTMT6plex [N-Term]		3.43819e-05	0	1	1	1	P38919	P38919 [183-195]	0	1979.06	0	88.4	91.9	94	96.7	101.4	118		Not Found	Not Found	Not Found	Not Found	Not Found	Not Found	Not Found	Not Found	Not Found	High	Not Found	High	0	3.437e-06	4.05
FALSE	High	[R].RSSDPVPGPPADTQPSASHPGGQSLK.[L]	1xPhospho [S]; 1xTMT6plex [K26]; 1xTMT6plex [N-Term]	Q8TEW8 1xPhospho [S]	2.43007e-09	0	1	1	4	Q8TEW8	Q8TEW8 [139-164]	1	3108.55	0	92.9	102.2	97.7	115.3	97.9	108.1		Not Found	Not Found	Not Found	Not Found	High	High	Not Found	Not Found	Not Found	Not Found	Not Found	High	0	4.903e-10	7.7
FALSE	High	[R].RSSDPALIGLSTSVSDSNFSSEEPSR.[K]	1xPhospho [S3]; 1xTMT6plex [N-Term]	Q8TEW0 1xPhospho [S144]	8.90033e-08	0	1	1	1	Q8TEW0	Q8TEW0 [142-167]	1	3034.42	0	95.9	100	102.5	106.7	99.2	109.5		Not Found	Not Found	Not Found	Not Found	High	Not Found	Not Found	Not Found	Not Found	Not Found	Not Found	High	0	1.378e-08	5.29
FALSE	High	[K].RSSDGSLSHEEDLAK.[V]	2xPhospho [S6; S]; 1xTMT6plex [K15]; 1xTMT6plex [N-Term]	Q13136 2xPhospho [S242; S]	6.27944e-05	0	1	1	4	Q13136	Q13136 [237-251]	1	2249.03	0	102.8	105.1	94.9	99.1	100.1	106.8		Not Found	Not Found	High	Not Found	Not Found	Not Found	Not Found	Not Found	Not Found	Not Found	High	High	0	5.975e-06	4.58
FALSE	High	[K].MMDYLQGSGETPQTDVR.[W]	1xOxidation [M]; 1xTMT6plex [N-Term]		8.43214e-06	0	1	1	3	Q14697	Q14697 [338-354]	0	2173.01	0	94.4	93.7	91.8	98.6	110	128.5		Not Found	Not Found	Not Found	Not Found	Not Found	Not Found	Not Found	Not Found	Not Found	High	Not Found	High	0	9.325e-07	4.35
FALSE	High	[R].RSPVSTRPLPSASQK.[A]	1xPhospho [S2]; 1xTMT6plex [K15]; 1xTMT6plex [N-Term]	Q8ND56 1xPhospho [S216]	0.0823236	0.00245983	1	1	1	Q8ND56	Q8ND56 [215-229]	1	2149.19	0	88.9	94.6	109.1	106.5	105.1	76.8		Not Found	Not Found	Not Found	Not Found	Not Found	Not Found	High	Not Found	Not Found	Not Found	Not Found	High	0.0008413	0.01222	3.06
FALSE	High	[R].RSPVSPQLQQQHQAAAAAFLQQR.[N]	1xPhospho [S]; 1xTMT6plex [N-Term]	Q7Z5Q1 1xPhospho [S]	1.88344e-07	0	1	1	2	Q7Z5Q1	Q7Z5Q1 [88-110]	1	2869.48	0	94	87.8	90.9	119	94.6	103.7		Not Found	Not Found	Not Found	Not Found	Not Found	Not Found	Not Found	High	Not Found	Not Found	Not Found	High	0	2.755e-08	4.69
FALSE	High	[R].MNGVMFPGNSPSYTER.[S]	1xPhospho [S10]; 1xTMT6plex [N-Term]	Q9NY27 1xPhospho [S159]	0.00084785	0	1	1	1	Q9NY27	Q9NY27 [150-165]	0	2095.92	0	99.8	102.2	93.5	99.2	97.6	97.3		Not Found	Not Found	Not Found	Not Found	Not Found	High	Not Found	Not Found	Not Found	Not Found	Not Found	High	0	6.157e-05	3.88
FALSE	High	[R].RSPVPAQIAITVPK.[T]	1xPhospho [S2]; 1xTMT6plex [K14]; 1xTMT6plex [N-Term]	O43432 1xPhospho [S495]	6.07603e-07	0	1	1	4	O43432	O43432 [494-507]	1	2015.18	0	91.9	91	101	98.9	106.1	103.3		Not Found	Not Found	Not Found	Not Found	Not Found	Not Found	High	High	High	Not Found	Not Found	High	0	1.036e-06	5.4
FALSE	High	[K].MNIASPGTVHK.[R]	1xPhospho [S5]; 1xTMT6plex [K11]; 1xTMT6plex [N-Term]	Q9NRH2 1xPhospho [S518]	0.000327924	0	1	1	1	Q9NRH2	Q9NRH2 [514-524]	0	1692.89	0	91.4	105	91.9	110.8	96.8	97.5		Not Found	Not Found	Not Found	Not Found	Not Found	Not Found	High	Not Found	Not Found	Not Found	Not Found	High	0	2.685e-05	3.33
FALSE	High	[R].RSSLPLDHGSPAQENPESEK.[S]	1xPhospho [S]; 1xTMT6plex [K20]; 1xTMT6plex [N-Term]	Q5VZ89 1xPhospho [S]	7.47881e-08	0	1	1	4	Q5VZ89	Q5VZ89 [1276-1295]	1	2716.33	0	110.1	73.5	115.9	85.6	113.5	91.3		Not Found	High	High	Not Found	Not Found	Not Found	Not Found	Not Found	Not Found	Not Found	High	High	0	1.173e-08	6.79
FALSE	High	[K].MNLSEEVDLEDYVARPDK.[I]	1xTMT6plex [K18]; 1xTMT6plex [N-Term]		1.11691e-05	0	1	1	1	P43686	P43686 [352-369]	0	2581.32	0	90.2	84.9	95	100.3	101.2	122.4		Not Found	Not Found	Not Found	Not Found	Not Found	Not Found	Not Found	Not Found	Not Found	High	Not Found	High	0	1.213e-06	4.96
FALSE	High	[K].MNPQSAFFQGK.[L]	1xPhospho [S5]; 1xTMT6plex [K11]; 1xTMT6plex [N-Term]	P22307 1xPhospho [S516]	0.197595	0.00837906	1	1	1	P22307	P22307 [512-522]	0	1792.89	0	94.6	91.6	96.3	92.2	107.3	93.7		Not Found	Not Found	Not Found	Not Found	Not Found	Not Found	Not Found	High	Not Found	Not Found	Not Found	High	0.003271	0.04793	1.63
FALSE	High	[R].MNSLTFK.[K]	1xPhospho [S3]; 1xTMT6plex [K7]; 1xTMT6plex [N-Term]	Q96N67 1xPhospho [S1383]	0.0854848	0.0025315	1	1	3	Q96N67	Q96N67 [1381-1387]	0	1378.72	0	95.8	96.5	97	100.6	104	96		Not Found	Not Found	Not Found	Not Found	Not Found	Not Found	High	High	High	Not Found	Not Found	High	0.009783	0.152	2.54
FALSE	High	[R].RSPSPYYSR.[YG]	2xPhospho [S2; S4]; 1xTMT6plex [N-Term]	P62995 2xPhospho [S264; S266]	0.0039708	0.000108793	1	2	1	P62995	P62995 [263-271]	1	1501.64	0	90	93.5	101.6	86.1	101	144.2		Not Found	Not Found	Not Found	Not Found	Not Found	Not Found	Not Found	Not Found	Not Found	Not Found	High	High	3.165e-05	0.0002281	3.17
FALSE	High	[R].RSPSPAPPPR.[R]	2xPhospho [S2; S4]; 1xTMT6plex [N-Term]	Q8IYB3 2xPhospho [S560; S562]	0.0378592	0.00057911	1	1	1	Q8IYB3	Q8IYB3 [559-568]	1	1450.68	0	121.9	91.6	92.5	67.8	91.8	146.9		Not Found	Not Found	Not Found	Not Found	Not Found	Not Found	Not Found	Not Found	Not Found	Not Found	High	High	0.0002417	0.003494	3.14
FALSE	High	[R].MNSTGGQTPR.[R]	1xPhospho [T8]; 1xOxidation [M1]; 1xTMT6plex [N-Term]	Q96ST2 1xPhospho [T725]	0.0992905	0.00260894	1	1	2	Q96ST2	Q96ST2 [718-727]	0	1373.61	0	117.9	110.2	106.7	96.9	107	82.1		High	Not Found	Not Found	Not Found	Not Found	Not Found	Not Found	Not Found	Not Found	Not Found	High	High	0.0009733	0.01652	2.18
FALSE	High	[K].RSPSAPAATSSASSSTSSYK.[R]	1xPhospho [S]; 1xTMT6plex [K20]; 1xTMT6plex [N-Term]	Q15345 1xPhospho [S]	0.000112405	0	1	1	2	Q15345	Q15345 [356-375]	1	2468.21	0	84	85.3	106.4	109.6	88.3	104.8		Not Found	Not Found	Not Found	Not Found	High	Not Found	Not Found	Not Found	Not Found	Not Found	Not Found	High	0	1.336e-05	3.13
FALSE	High	[K].MPDEPEEPVVAVSSPAVPPPTK.[V]	1xPhospho [S]; 1xTMT6plex [K22]; 1xTMT6plex [N-Term]	O60885 1xPhospho [S]	9.4506e-07	0	1	1	4	O60885	O60885 [457-478]	0	2811.43	0	94.8	99.6	97.3	96.7	99	106.8		Not Found	Not Found	Not Found	High	High	Not Found	Not Found	Not Found	Not Found	Not Found	Not Found	High	0	1.233e-07	5.3
FALSE	High	[R].RSPPPSLAK.[Q]	1xPhospho [S2]; 1xTMT6plex [K9]; 1xTMT6plex [N-Term]	P54284 1xPhospho [S152]	0.000548912	0	1	1	1	P54284	P54284 [151-159]	1	1490.85	0	92.3	75.3	95.5	98.2	116.9	121.6		Not Found	Not Found	Not Found	Not Found	Not Found	High	Not Found	Not Found	Not Found	Not Found	Not Found	High	0	4.246e-05	3.12
FALSE	High	[K].MPFLSISSPK.[V]	1xPhospho [S]; 1xTMT6plex [K10]; 1xTMT6plex [N-Term]	Q09666 1xPhospho [S]	0.00681811	0.000108793	1	1	3	Q09666	Q09666 [3405-3414]	0	1644.88	0	95.9	101.2	109.9	97.9	82.5	90.6		Not Found	Not Found	Not Found	Not Found	Not Found	Not Found	Not Found	Not Found	High	Not Found	Not Found	High	3.165e-05	0.0003932	2.95
FALSE	High	[R].RSPPEEPPDFCCPK.[C]	2xCarbamidomethyl [C11; C12]; 1xPhospho [S2]; 1xTMT6plex [K14]; 1xTMT6plex [N-Term]	Q9Y6K9 1xPhospho [S387]	6.45167e-06	0	1	1	2	Q9Y6K9	Q9Y6K9 [386-399]	1	2254.04	0	89.3	105.7	99.6	122.5	91	72.4		Not Found	Not Found	Not Found	Not Found	High	Not Found	Not Found	Not Found	Not Found	Not Found	Not Found	High	0	7.294e-07	5.45
FALSE	High	[R].RSPPAPGLQPMR.[S]	1xPhospho [S2]; 1xOxidation [M11]; 1xTMT6plex [N-Term]	P15408 1xPhospho [S200]	0.0319413	0.000389981	1	1	1	P15408	P15408 [199-210]	1	1631.83	0	104.5	85.7	99.5	89.5	124.1	112		Not Found	Not Found	Not Found	Not Found	Not Found	High	Not Found	Not Found	Not Found	Not Found	Not Found	High	0.0001904	0.002716	3.26
FALSE	High	[R].RSPPAPGLQPMR.[S]	1xPhospho [S2]; 1xTMT6plex [N-Term]	P15408 1xPhospho [S200]	0.00139996	0.000108793	1	1	3	P15408	P15408 [199-210]	1	1615.83	0	89	81	92.7	86.7	117.3	121		Not Found	Not Found	Not Found	Not Found	Not Found	High	High	High	Not Found	Not Found	Not Found	High	3.165e-05	9.258e-05	4.56
FALSE	High	[R].RSPPADAIPK.[S]	1xPhospho [S2]; 1xTMT6plex [K10]; 1xTMT6plex [N-Term]	P18754 1xPhospho [S11]	0.0431227	0.000856746	1	1	1	P18754	P18754 [10-19]	1	1589.88	0	98.3	99.9	90.9	123.5	109.1	81.5		Not Found	Not Found	Not Found	Not Found	High	Not Found	Not Found	Not Found	Not Found	Not Found	Not Found	High	0.0003161	0.004298	2.46
FALSE	High	[R].RSPTEDFR.[Q]	1xPhospho [S2]; 1xTMT6plex [N-Term]	Q8IXT5 1xPhospho [S638]	0.0659584	0.00175403	1	1	3	Q8IXT5	Q8IXT5 [637-644]	1	1316.62	0	92.7	82.1	96.5	86.3	102.7	148.5		High	Not Found	Not Found	Not Found	Not Found	Not Found	Not Found	Not Found	Not Found	Not Found	High	High	0.002445	0.03877	2.49
FALSE	High	[K].SDISPLTPR.[E]	2xPhospho [S4; T7]; 1xTMT6plex [N-Term]	P46821 2xPhospho [S1785; T1788]	0.205635	0.00868388	1	1	5	P46821	P46821 [1782-1790]	0	1374.63	0	99.4	89	104.3	87	100.6	115.7		Not Found	Not Found	Not Found	Not Found	Not Found	Not Found	Not Found	Not Found	Not Found	Not Found	High	High	0.005718	0.08813	2.39
FALSE	High	[K].SEEMQTVQQEQLLQETQALQQSFLSEK.[D]	1xTMT6plex [K27]; 1xTMT6plex [N-Term]		2.79541e-07	0	1	1	1	Q15149	Q15149 [2610-2636]	0	3638.86	0	102	94.8	96.2	103	102	95.8		Not Found	Not Found	Not Found	Not Found	Not Found	Not Found	Not Found	Not Found	Not Found	High	Not Found	High	0	3.988e-08	5.66
FALSE	High	[R].SDPLLIGIPTSENPFK.[D]	1xPhospho [S1]; 1xTMT6plex [K16]; 1xTMT6plex [N-Term]	Q9UBI6 1xPhospho [S49]	9.83784e-07	0	1	1	2	Q9UBI6	Q9UBI6 [49-64]	0	2266.21	0	127.1	127.6	106.4	85.4	95.9	100.2		Not Found	Not Found	Not Found	Not Found	Not Found	High	High	Not Found	Not Found	Not Found	Not Found	High	0	1.279e-07	4.63
FALSE	High	[R].SKSLQLTGK.[E]	1xPhospho [S3]; 2xTMT6plex [K2; K9]; 1xTMT6plex [N-Term]	Q9UBS9 1xPhospho [S1081]	0.0490897	0.000948301	1	1	1	Q9UBS9	Q9UBS9 [1079-1087]	1	1729.02	0	124.7	102.5	104.5	106.7	115.7	74.9		Not Found	Not Found	Not Found	Not Found	Not Found	Not Found	Not Found	High	Not Found	Not Found	Not Found	High	0.0003407	0.005299	2.7
FALSE	High	[R].LVSPEQPPK.[A]	1xPhospho [S3]; 1xTMT6plex [K9]; 1xTMT6plex [N-Term]	O43491 1xPhospho [S499]	0.192013	0.00779766	1	1	1	O43491	O43491 [497-505]	0	1532.85	0	103.6	92.9	97	107.8	104.5	80.5		Not Found	Not Found	Not Found	Not Found	High	Not Found	Not Found	Not Found	Not Found	Not Found	Not Found	High	0.003075	0.04598	2.65
FALSE	High	[R].SKSLADIK.[E]	1xPhospho [S3]; 2xTMT6plex [K2; K8]; 1xTMT6plex [N-Term]	Q08AD1 1xPhospho [S844]	0.0938881	0.0025315	1	1	1	Q08AD1	Q08AD1 [842-849]	1	1628.96	0	102.1	101.5	92	111.7	89.5	50.2		Not Found	Not Found	Not Found	Not Found	Not Found	Not Found	High	Not Found	Not Found	Not Found	Not Found	High	0.0009733	0.01516	2.18
FALSE	High	[R].LVSPGSANETSSILVESVTR.[S]	1xPhospho [S]; 1xTMT6plex [N-Term]	O75369 1xPhospho [S]	8.10822e-10	0	1	1	13	O75369	O75369 [2476-2495]	0	2355.2	0	86.8	88.7	91.8	93	102.7	138.3		Not Found	Not Found	Not Found	Not Found	Not Found	High	High	High	Not Found	Not Found	Not Found	High	0	1.98e-09	6.67
FALSE	High	[R].SKSHESQLGNR.[I]	1xPhospho [S]; 1xTMT6plex [K2]; 1xTMT6plex [N-Term]	Q8IVT5 1xPhospho [S]	0.163155	0.00582095	1	1	2	Q8IVT5	Q8IVT5 [309-319]	1	1780.91	0	94.3	103.3	96.4	98.1	93	80.7		Not Found	Not Found	Not Found	Not Found	High	Not Found	Not Found	Not Found	Not Found	Not Found	Not Found	High	0.004792	0.07263	3.19
FALSE	High	[R].LVSQDNFGFDLPAVEAATK.[K]	1xTMT6plex [K19]; 1xTMT6plex [N-Term]		1.90883e-07	0	1	1	1	Q01082	Q01082 [444-462]	0	2480.34	0	86.1	94.2	81.7	96.4	114	131.3		Not Found	Not Found	Not Found	Not Found	Not Found	Not Found	Not Found	Not Found	Not Found	High	Not Found	High	0	2.797e-08	5
FALSE	High	[R].SKSETGDSSIFR.[K]	1xPhospho [S3]; 1xTMT6plex [K2]; 1xTMT6plex [N-Term]	O43166 1xPhospho [S288]	0.176057	0.00689042	1	1	1	O43166	O43166 [286-297]	1	1851.93	0	104	115.2	90.8	115	99.9	88.7		Not Found	Not Found	Not Found	Not Found	Not Found	High	Not Found	Not Found	Not Found	Not Found	Not Found	High	0.002712	0.04092	3.23
FALSE	High	[K].LVSSAVSPSIIPQEDPSQQFLQQSLER.[V]	1xPhospho [S7]; 1xTMT6plex [N-Term]	Q96HW7 1xPhospho [S600]	0.000162418	0	1	1	1	Q96HW7	Q96HW7 [594-620]	0	3292.67	0	96.8	96.2	89.3	111.4	88	134.6		Not Found	Not Found	Not Found	Not Found	Not Found	High	Not Found	Not Found	Not Found	Not Found	Not Found	High	0	1.429e-05	4.37
FALSE	High	[K].LVSYTNLTQGAK.[E]	1xPhospho [S3]; 1xTMT6plex [K12]; 1xTMT6plex [N-Term]	Q9UP95 1xPhospho [S88]	9.83538e-06	0	1	1	1	Q9UP95	Q9UP95 [86-97]	0	1832.99	0	104.1	86.7	113	93.9	99.2	108.1		Not Found	Not Found	Not Found	Not Found	Not Found	Not Found	Not Found	High	Not Found	Not Found	Not Found	High	0	1.074e-06	3.85
FALSE	High	[R].SKSEDMDNVQSK.[R]	1xPhospho [S3]; 1xOxidation [M6]; 2xTMT6plex [K2; K12]; 1xTMT6plex [N-Term]	Q6VMQ6 1xPhospho [S559]	0.166058	0.00598264	1	1	1	Q6VMQ6	Q6VMQ6 [557-568]	1	2151.06	0	120.7	118.3	127.7	95.8	92.6	51.1		Not Found	Not Found	Not Found	Not Found	High	Not Found	Not Found	Not Found	Not Found	Not Found	Not Found	High	0.002381	0.0376	2.71
FALSE	High	[K].SKSEASLLQLLAGAGTHGTPSAPSR.[S]	1xPhospho [S]; 1xTMT6plex [K2]; 1xTMT6plex [N-Term]	O94827 1xPhospho [S]	6.11531e-06	0	1	1	2	O94827	O94827 [876-900]	1	2974.58	0	89.1	90.3	103.9	108.9	117.7	96.3		Not Found	Not Found	Not Found	Not Found	Not Found	Not Found	Not Found	High	Not Found	Not Found	Not Found	High	0	6.954e-07	5.09
FALSE	High	[K].LVTSGAESGNLNTSPSSNQTR.[N]	1xPhospho [T/S]; 1xTMT6plex [N-Term]	Q8NHV4 1xPhospho [S/T]	1.7265e-07	0	1	1	2	Q8NHV4	Q8NHV4 [503-523]	0	2429.15	0	94.7	104.3	110	119.5	82	81.1		Not Found	Not Found	Not Found	Not Found	High	Not Found	Not Found	Not Found	Not Found	Not Found	Not Found	High	0	2.54e-08	4.76
FALSE	High	[R].SKSDATASISLSSNLK.[R]	1xPhospho [S]; 2xTMT6plex [K2; K16]; 1xTMT6plex [N-Term]	Q9UBF8 1xPhospho [S]	9.58031e-08	0	1	1	2	Q9UBF8	Q9UBF8 [275-290]	1	2376.3	0	104.3	103.4	97.4	97.4	94.9	79.7		Not Found	Not Found	Not Found	Not Found	Not Found	Not Found	Not Found	High	Not Found	Not Found	Not Found	High	0	1.472e-08	5.39
FALSE	High	[R].SKSATLLYDQPLQVFTGSSSSSDLISGTK.[A]	1xPhospho [S/T]; 2xTMT6plex [K2; K29]; 1xTMT6plex [N-Term]	Q96RT1 1xPhospho [S/T]	0.000230015	0	1	1	3	Q96RT1	Q96RT1 [913-941]	1	3784.99	0	105.5	105.6	96.8	113.9	103.3	83.3		Not Found	Not Found	Not Found	Not Found	Not Found	Not Found	Not Found	High	Not Found	Not Found	Not Found	High	0	1.958e-05	4.28
FALSE	High	[K].SKPPPTYESEEEDKCKPMSYEEK.[R]	1xCarbamidomethyl [C15]; 1xPhospho [S9]; 1xOxidation [M18]; 4xTMT6plex [K2; K14; K16; K23]; 1xTMT6plex [N-Term]	O60885 1xPhospho [S601]	0.00391812	0.000108793	1	1	3	O60885	O60885 [593-615]	1	4030.01	0	95.7	118.5	107.6	135.1	81	47.1		Not Found	Not Found	Not Found	Not Found	Not Found	Not Found	High	Not Found	Not Found	Not Found	Not Found	High	3.165e-05	0.0002249	3.28
FALSE	High	[K].SKPPPTYESEEEDKCKPMSYEEK.[R]	1xCarbamidomethyl [C15]; 1xPhospho [S/Y]; 4xTMT6plex [K2; K14; K16; K23]; 1xTMT6plex [N-Term]	O60885 1xPhospho [S/Y]	5.10433e-06	0	1	1	9	O60885	O60885 [593-615]	1	4014.01	0	98.3	129.3	106.9	143.7	76.3	28.4		Not Found	Not Found	Not Found	Not Found	Not Found	High	High	High	Not Found	Not Found	Not Found	High	0	2.413e-05	5.42
FALSE	High	[K].SKPPPTYESEEEDK.[C]	1xPhospho [S9]; 2xTMT6plex [K2; K14]; 1xTMT6plex [N-Term]	O60885 1xPhospho [S601]	5.72084e-07	0	1	1	1	O60885	O60885 [593-606]	0	2403.19	0	107.2	134.3	97.1	96.6	83.7	50.9		Not Found	Not Found	Not Found	Not Found	High	Not Found	Not Found	Not Found	Not Found	Not Found	Not Found	High	0	7.745e-08	6.21
FALSE	High	[K].SKPIPIMPASPQK.[G]	1xPhospho [S10]; 1xOxidation [M7]; 2xTMT6plex [K2; K13]; 1xTMT6plex [N-Term]	O00429 1xPhospho [S616]	9.32262e-06	0	1	1	6	O00429	O00429 [607-619]	0	2177.24	0	93.6	106.8	97.4	109.7	94.2	68.6		Not Found	Not Found	Not Found	Not Found	Not Found	Not Found	Not Found	High	High	Not Found	Not Found	High	0	1.022e-06	4.33
[truncated: 8,399 more rows]
