# Supplementary material for: Integrative Proteomic and Phosphoproteomic Analyses of Hypoxia-Treated Pulmonary Artery Smooth Muscle Cells
Source: Proteomes. 2022 Jun 28;10(3):23. doi: 10.3390/proteomes10030023 (PMC9326561; doi:10.3390/proteomes10030023)
Supplement: Supplementary file 1 [file proteomes-10-00023-s001.zip › Table S4.xls]

## Sheet: up
List of significantly upregulated phosphopeptides
Annotated Sequence	Modifications in Master Proteins	Master Protein Accessions	Positions in Master Proteins	Fold change	Gene name	Protein names	Novel site
[R].SSGMSSLLGK.[I]	Q9UEE9 1xPhospho [S221]	Q9UEE9	Q9UEE9 [221-230]	1.76588	CFDP1	Craniofacial development protein 1
[R].LLGPSAAADILQLSSSLPLQSR.[G]	Q7Z6Z7 1xPhospho [S]	Q7Z6Z7	Q7Z6Z7 [2580-2601]	1.71936	HUWE1	E3 ubiquitin-protein ligase HUWE1
[R].GGNFGFGDSR.[G]	P22626 1xPhospho [S212]	P22626	P22626 [204-213]	1.67975	HNRNPA2B1	Heterogeneous nuclear ribonucleoproteins A2/B1
[R].TVIIEQSWGSPK.[V]	P10809 1xPhospho [S70]	P10809	P10809 [61-72]	1.67463	HSPD1	60 kDa heat shock protein, mitochondrial
[R].EVSKPVGGAEGVEVPRSPVLLCK.[L]	Q8TED9 1xPhospho [S329]	Q8TED9	Q8TED9 [313-335]	1.6382	AFAP1L1	Actin filament-associated protein 1-like 1
[K].GGVSYRPAEVAETGA.[-]	Q16790 1xPhospho [S/T]	Q16790	Q16790 [445-459]	1.58711	CA9	Carbonic anhydrase 9
[K].VDGPRSPSYGR.[S]	Q07955 1xPhospho [S199]	Q07955	Q07955 [194-204]	1.52296	SRSF1	Serine/arginine-rich splicing factor 1
[R].TFDATNPLNLCVK.[I]	Q8TD19 1xPhospho [T254]	Q8TD19	Q8TD19 [250-262]	1.51201	NEK9	Serine/threonine-protein kinase Nek9
[R].RASAPHGPLDMAPFAR.[L]	Q8N4B1 1xPhospho [S213]	Q8N4B1	Q8N4B1 [211-226]	1.48824	PHETA1	Sesquipedalian-1
[K].ENLRPSSPHR.[S]	Q9H2D6 1xPhospho [S882]	Q9H2D6	Q9H2D6 [876-885]	1.4788	TRIOBP	TRIO and F-actin-binding protein
[R].RDSSEGPPGSEGDGGGQSKPSNASGGVDK.[A]	Q9NRH2 1xPhospho [S]	Q9NRH2	Q9NRH2 [567-595]	1.46388	SNRK	SNF-related serine/threonine-protein kinase
[R].ELDELMASLSDFK.[I]	P49023 1xPhospho [S272]	P49023	P49023 [265-277]	1.45235	PXN	Paxillin
[R].GSYGSDAEEEEYRQQLSEHSK.[R]	Q9UDY2 1xPhospho [S/Y]	Q9UDY2	Q9UDY2 [1155-1175]	1.41644	TJP2	Tight junction protein ZO-2
[K].GGSCGLPLMNSFNLK.[D]	Q96S15 1xPhospho [S484]	Q96S15	Q96S15 [474-488]	1.41352	WDR24	GATOR complex protein WDR24
[R].KQSAGPNSPTGGGGGGGSGGTR.[M]	A7E2V4 1xPhospho [S]	A7E2V4	A7E2V4 [46-67]	1.40555	ZSWIM8	Zinc finger SWIM domain-containing protein 8
[R].SLSFSEPQQPAPAMK.[S]	Q9H8N7 1xPhospho [S]	Q9H8N7	Q9H8N7 [447-461]	1.38859	ZNF395	Zinc finger protein 395
[K].SLSETTATMLWK.[S]	Q93073 1xPhospho [S]	Q93073	Q93073 [231-242]	1.38819	SECISBP2L	Selenocysteine insertion sequence-binding protein 2-like
[R].QQDLHLESPQRQPEYSPESPR.[C]	Q9H6F5 1xPhospho [S102]	Q9H6F5	Q9H6F5 [95-115]	1.38633	CCDC86	Coiled-coil domain-containing protein 86
[R].SFSLPADPILQAAK.[F]	B7ZBB8 1xPhospho [S]	B7ZBB8	B7ZBB8 [84-97]	1.37299	PPP1R3G	Protein phosphatase 1 regulatory subunit 3G
[R].RLSPGSDIYVTVSSMALAR.[S]	O43166 1xPhospho [S]	O43166	O43166 [1125-1143]	1.36943	SIPA1L1	Signal-induced proliferation-associated 1-like protein 1
[R].MGPSGGEGMEPERRDSQDGSSYR.[R]	Q14847 1xPhospho [S146]	Q14847	Q14847 [131-153]	1.36419	LASP1	LIM and SH3 domain protein 1
[R].TVPPAVTGITFLSGGQSEEEASINLNAINK.[C]	P04075 1xPhospho [S/T]	P04075	P04075 [260-289]	1.36388	ALDOA	Fructose-bisphosphate aldolase A
[R].QENCGAQQVPAGPGTSTPPSSPVR.[T]	Q96G46 2xPhospho [S/T]	Q96G46	Q96G46 [257-280]	1.3592	DUS3L	tRNA-dihydrouridine
[R].RDSTSSLQR.[K]	Q96CC6 1xPhospho [S8]	Q96CC6	Q96CC6 [6-14]	1.35768	RHBDF1	Inactive rhomboid protein 1
[R].KSTGQLNLSTSPINSSSYLGYNSNAR.[S]	O94915 1xPhospho [S/T]	O94915	O94915 [1913-1938]	1.35521	FRYL	Protein furry homolog-like
[K].DFQDYMEPEEGCQGSPQRR.[G]	O43237 1xPhospho [S194]	O43237	O43237 [180-198]	1.35039	DYNC1LI2	Cytoplasmic dynein 1 light intermediate chain 2
[R].SSPHGSLGSVVNSLSGLK.[L]	Q5VZ89 1xPhospho [S]	Q5VZ89	Q5VZ89 [1332-1349]	1.35006	DENND4C	DENN domain-containing protein 4C
[R].TASGSSVTSLDGTR.[S]	Q92597 1xPhospho [S/T]	Q92597	Q92597 [328-341]	1.34298	NDRG1	Protein NDRG1
[R].RIDISPSTFR.[K]	Q9Y2W1 1xPhospho [S682]	Q9Y2W1	Q9Y2W1 [678-687]	1.33924	THRAP3	Thyroid hormone receptor-associated protein 3
[R].TEAQDLCRASPEPPGPESSSR.[W]	Q9C0C2 1xPhospho [S672]	Q9C0C2	Q9C0C2 [663-683]	1.33863	TNKS1BP1	182 kDa tankyrase-1-binding protein
[R].GDSETDLEALFNAVMNPK.[T]	P46937 1xPhospho [S/T]	P46937	P46937 [59-76]	1.32378	YAP1	Transcriptional coactivator YAP1
[K].TSWAGAPVHLGQGQFLK.[F]	P48681 1xPhospho [S/T]	P48681	P48681 [1589-1605]	1.31861	NES	Nestin
[K].VPPREPLSPSNSR.[T]	Q9UJM3 1xPhospho [S326]	Q9UJM3	Q9UJM3 [319-331]	1.31576	ERRFI1	ERBB receptor feedback inhibitor 1
[K].ALESPERPFLAILGGAK.[V]	P00558 1xPhospho [S203]	P00558	P00558 [200-216]	1.31462	PGK1	Phosphoglycerate kinase 1
[R].RFSADEQFFSVGQAASSSAHSSK.[S]	P46019 1xPhospho [S1015]	P46019	P46019 [1013-1035]	1.31453	PHKA2	Phosphorylase b kinase regulatory subunit alpha, liver isoform
[R].SPFEIISPPASPPEMVGQR.[V]	P78559 2xPhospho [S1797;S1801]	P78559	P78559 [1791-1809]	1.30169	MAP1A	Microtubule-associated protein 1A
[R].LSGSRQDLIPSYSLGSNK.[G]	Q9NQT8 1xPhospho [S1391]	Q9NQT8	Q9NQT8 [1388-1405]	1.29346	KIF13B	Kinesin-like protein KIF13B
[K].LCAGIMITASHNPK.[Q]	Q96G03 1xPhospho [S165]	Q96G03	Q96G03 [156-169]	1.2916	PGM2	Phosphopentomutase
[R].RPPGPTTSPASTSLSSPGQR.[D]	Q01970 1xPhospho [T/S]	Q01970	Q01970 [919-938]	1.28572	PLCB3	1-phosphatidylinositol 4,5-bisphosphate phosphodiesterase beta-3
[R].SWHDVQVSSAYVK.[T]	O43399 1xPhospho [S96]	O43399	O43399 [96-108]	1.28415	TPD52L2	Tumor protein D54
[R].AGSPNTPPPR.[E]	Q1RMZ1 1xPhospho [S18]	Q1RMZ1	Q1RMZ1 [16-25]	1.27826	BMT2	S-adenosylmethionine sensor upstream of mTORC1
[R].KMSGGSTMSSGGGNTNNSNSK.[K]	Q86U70 1xPhospho [S]	Q86U70	Q86U70 [300-320]	1.27686	LDB1	LIM domain-binding protein 1
[R].IIYCSPGLVPTANLNHSVGK.[G]	Q96S15 1xPhospho [S470]	Q96S15	Q96S15 [454-473]	1.27446	WDR24	GATOR complex protein WDR24
[R].LQTICLSGTGMK.[S]	Q9Y2U5 1xPhospho [S514]	Q9Y2U5	Q9Y2U5 [508-519]	1.27185	MAP3K2	Mitogen-activated protein kinase kinase kinase 2
[K].KVNVTVDYIRPASPATETVPAFSER.[T]	Q7KZF4 1xPhospho [S426]	Q7KZF4	Q7KZF4 [414-438]	1.26653	SND1	Staphylococcal nuclease domain-containing protein 1
[K].QICLVMLETLSQSPQGR.[V]	Q15365 1xPhospho [S173]	Q15365	Q15365 [161-177]	1.25824	PCBP1	Poly
[R].AVTTVTQSTPVPGPSVPPPEELQVSPGPR.[Q]	P51610 1xPhospho [S1507]	P51610	P51610 [1483-1511]	1.25807	HCFC1	Host cell factor 1
[R].QPPGTQQSHSSPGEITSSPQGLDNPALLR.[D]	Q5TDH0 1xPhospho [S]	Q5TDH0	Q5TDH0 [111-139]	1.25072	DDI2	Protein DDI1 homolog 2
[K].LDVSRSPPLMVK.[K]	Q8N264 1xPhospho [S]	Q8N264	Q8N264 [410-421]	1.24837	ARHGAP24	Rho GTPase-activating protein 24
[R].SKSPVGNPQLIQFSR.[E]	Q9Y4F3 1xPhospho [S]	Q9Y4F3	Q9Y4F3 [1091-1105]	1.2478	MARF1	Meiosis regulator and mRNA stability factor 1
[K].AIGGIILTASHNPGGPNGDFGIK.[F]	P36871 1xPhospho [S/T]	P36871	P36871 [108-130]	1.24708	PGM1	Phosphoglucomutase-1
[R].FLAAVQLPDGFNLLCPTPPPPPDTGPEK.[L]	Q96PE2 1xPhospho [T1991]	Q96PE2	Q96PE2 [1975-2002]	1.24702	ARHGEF17	Rho guanine nucleotide exchange factor 17
[R].STSPIIGSPPVR.[A]	Q86TB9 1xPhospho [T/S]	Q86TB9	Q86TB9 [177-188]	1.2464	PATL1	Protein PAT1 homolog 1
[R].AASLDSVATSR.[V]	Q9Y2J4 1xPhospho [S759]	Q9Y2J4	Q9Y2J4 [757-767]	1.243	AMOTL2	Angiomotin-like protein 2
[K].SEPISPPRDR.[M]	Q02078 1xPhospho [S]	Q02078	Q02078 [404-413]	1.24164	MEF2A	Myocyte-specific enhancer factor 2A
[K].LDFCSALSSQGSSPR.[M]	Q14938 1xPhospho [S]	Q14938	Q14938 [329-343]	1.23914	NFIX	Nuclear factor 1 X-type
[K].LFAPVPFPSGSTEDVSPSGPQQPPPLPQK.[K]	Q86YV5 1xPhospho [S/T]	Q86YV5	Q86YV5 [790-818]	1.23744	PRAG1	Inactive tyrosine-protein kinase PRAG1
[R].LLLERPSPIRDR.[R]	Q96T37 1xPhospho [S700]	Q96T37	Q96T37 [694-705]	1.23719	RBM15	RNA-binding protein 15
[R].QPASAQSTPSTTPHSSPK.[Q]	Q96A73 2xPhospho [S/T]	Q96A73	Q96A73 [168-185]	1.2363	KIAA1191	Putative monooxygenase p33MONOX
[R].RGSSGSVDETLFALPAASEPVIR.[S]	Q9NQC3 2xPhospho [S182;S]	Q9NQC3	Q9NQC3 [179-201]	1.23628	RTN4	Reticulon-4
[R].MQEAMTQEVSDVFSDTTTPIK.[L]	P18206 1xPhospho [T/S]	P18206	P18206 [587-607]	1.23517	VCL	Vinculin
[R].GGPISFSSSR.[S]	P35580 1xPhospho [S]	P35580	P35580 [1931-1940]	1.22802	MYH10	Myosin-10
[K].AAPEASSPPASPLQHLLPGK.[A]	Q96TA1 1xPhospho [S]	Q96TA1	Q96TA1 [686-705]	1.22709	NIBAN2	Protein Niban 2
[R].KTVSLTPSPTTQVETPDLVDHDNTSPLFR.[T]	Q05209 1xPhospho [S/T]	Q05209	Q05209 [564-592]	1.22681	PTPN12	Tyrosine-protein phosphatase non-receptor type 12
[K].KSVSSENPTYPSAPLKPVTVPPR.[L]	Q5HYK7 1xPhospho [S]	Q5HYK7	Q5HYK7 [147-169]	1.22499	SH3D19	SH3 domain-containing protein 19
[R].GPDEAMEDGEEGSDDEAEWVVTK.[D]	Q9NZN4 1xPhospho [S438]	Q9NZN4	Q9NZN4 [426-448]	1.22492	EHD2	EH domain-containing protein 2
[R].SPSQNSQQSFDSSSPPTPQCHK.[R]	P11274 1xPhospho [S]	P11274	P11274 [369-390]	1.22426	BCR	Breakpoint cluster region protein
[K].IGTLQDRPPSPFREPPGSER.[V]	Q86UU1 1xPhospho [S404]	Q86UU1	Q86UU1 [395-414]	1.22377	PHLDB1	Pleckstrin homology-like domain family B member 1
[R].KLTSGSLSTSGILLDSER.[R]	Q6IQ26 1xPhospho [T/S]	Q6IQ26	Q6IQ26 [831-848]	1.22288	DENND5A	DENN domain-containing protein 5A
[K].GKLEAIITPPPAK.[K]	O75367 1xPhospho [T129]	O75367	O75367 [122-134]	1.22257	MACROH2A1	Core histone macro-H2A.1
[R].TPSIQPSLLPHAAPFAK.[S]	P35658 1xPhospho [S/T]	P35658	P35658 [1021-1037]	1.21907	NUP214	Nuclear pore complex protein Nup214
[K].CDSVEHLR.[G]	Q7L8J4 1xPhospho [S350]	Q7L8J4	Q7L8J4 [348-355]	1.21841	SH3BP5L	SH3 domain-binding protein 5-like
[K].LVGTPNPSTPLPNTVPQFIAR.[E]	Q93062 1xPhospho [T/S]	Q93062	Q93062 [110-130]	1.21177	RBPMS	RNA-binding protein with multiple splicing
[R].RGSSGSVDETLFALPAASEPVIR.[S]	Q9NQC3 1xPhospho [S]	Q9NQC3	Q9NQC3 [179-201]	1.20952	RTN4	Reticulon-4
[R].LTGSQLSITQVASIK.[Q]	Q9UJF2 1xPhospho [S/T]	Q9UJF2	Q9UJF2 [733-747]	1.20904	RASAL2	Ras GTPase-activating protein nGAP
[K].ALIQTCLNSPDSPPRSDPTTDQR.[M]	P11831 1xPhospho [S]	P11831	P11831 [213-235]	1.20641	SRF	Serum response factor
[K].ASLVALPEQTASEEETPPPLLTK.[E]	Q9UKV3 1xPhospho [T/S]	Q9UKV3	Q9UKV3 [399-421]	1.20618	ACIN1	Apoptotic chromatin condensation inducer in the nucleus
[R].SIEDLQPPSALSAPFTNSLAR.[S]	Q8IVF7 1xPhospho [S174]	Q8IVF7	Q8IVF7 [174-194]	1.20612	FMNL3	Formin-like protein 3
[R].MSSHTETSSFLQTLTGR.[L]	Q96N67 1xPhospho [S]	Q96N67	Q96N67 [962-978]	1.20369	DOCK7	Dedicator of cytokinesis protein 7
[R].MPSARPPSPPLSSWER.[V]	O43896 1xPhospho [S915]	O43896	O43896 [908-923]	1.20346	KIF1C	Kinesin-like protein KIF1C
[K].WVEENVPSSVTDVALPALLDSDEER.[M]	Q8NBN3 1xPhospho [S540]	Q8NBN3	Q8NBN3 [520-544]	1.20078	TMEM87A	Transmembrane protein 87A
[R].ASTNAMLISAGLPPLK.[A]	O43143 1xPhospho [S/T]	O43143	O43143 [63-78]	1.20063	DHX15	ATP-dependent RNA helicase DHX15
[R].MAPTPIPTRSPSDSSTASTPVAEQIER.[A]	Q16643 1xPhospho [S/T]	Q16643	Q16643 [328-354]	1.19766	DBN1	Drebrin
[K].TQSASPPPKER.[S]	Q9UN81 1xPhospho [S18]	Q9UN81	Q9UN81 [14-24]	1.19495	L1RE1	LINE-1 retrotransposable element ORF1 protein	Yes
[R].RLSPPGGSGSGVPGGGPLLPAAGR.[E]	Q8NFZ4 1xPhospho [S713]	Q8NFZ4	Q8NFZ4 [711-734]	1.19409	NLGN2	Neuroligin-2
[K].TVSSPPTSPRPGSAATVSASTSNIIPPR.[H]	O76094 1xPhospho [S/T]	O76094	O76094 [618-645]	1.19134	SRP72	Signal recognition particle subunit SRP72
[R].RSDSASSEPVGIYQGFEK.[K]	Q05655 1xPhospho [S]	Q05655	Q05655 [301-318]	1.19124	PRKCD	Protein kinase C delta type
[K].ICTLPSPPSPLASLAPVADSSTR.[V]	Q9UER7 1xPhospho [S]	Q9UER7	Q9UER7 [663-685]	1.18663	DAXX	Death domain-associated protein 6
[R].RVSLSEIGFGK.[L]	Q00536 1xPhospho [S153]	Q00536	Q00536 [151-161]	1.18395	CDK16	Cyclin-dependent kinase 16
[K].ELLSPLSEPDDRYPLIVK.[I]	Q9UHB7 1xPhospho [S]	Q9UHB7	Q9UHB7 [700-717]	1.18348	AFF4	AF4/FMR2 family member 4
[R].RFSDGAASIQAFK.[A]	Q9Y2K2 1xPhospho [S626]	Q9Y2K2	Q9Y2K2 [624-636]	1.18338	SIK3	Serine/threonine-protein kinase SIK3
[R].AASDPLLSSVSPAVSK.[A]	P19532 1xPhospho [S]	P19532	P19532 [546-561]	1.17665	TFE3	Transcription factor E3
[K].LAAGHELQPLAIVDQRPSSR.[A]	P17302 1xPhospho [S]	P17302	P17302 [347-366]	1.17511	GJA1	Gap junction alpha-1 protein
[R].ERSPSPPTIQSK.[R]	Q14687 2xPhospho [S826;S828]	Q14687	Q14687 [824-835]	1.17271	GSE1	Genetic suppressor element 1
[R].TSCSGSGERESPER.[K]	Q9H8Y5 1xPhospho [S56]	Q9H8Y5	Q9H8Y5 [46-59]	1.17231	ANKZF1	Ankyrin repeat and zinc finger domain-containing protein 1
[R].RDSPLQGSGQQNSQAGQR.[N]	O95819 1xPhospho [S639]	O95819	O95819 [637-654]	1.16874	MAP4K4	Mitogen-activated protein kinase kinase kinase kinase 4
[R].GVGDDQLGEESEERDDHLLPM.[-]	P20645 1xPhospho [S267]	P20645	P20645 [257-277]	1.16843	M6PR	Cation-dependent mannose-6-phosphate receptor
[K].YLSDSCSPR.[S]	P83436 1xPhospho [S]	P83436	P83436 [500-508]	1.16823	COG7	Conserved oligomeric Golgi complex subunit 7
[K].ASALLFSSDEEDQWNIPASQTHLASDSR.[S]	Q641Q2 1xPhospho [S]	Q641Q2	Q641Q2 [613-640]	1.16812	WASHC2A	WASH complex subunit 2A
[K].ASALLFSSDEEDQWNIPASQTHLASDSR.[S]	Q9Y4E1 1xPhospho [S]	Q9Y4E1	Q9Y4E1 [613-640]	1.16812	WASHC2C	WASH complex subunit 2C
[R].SLSAPGNLLTK.[K]	Q96RR4 1xPhospho [S511]	Q96RR4	Q96RR4 [509-519]	1.16654	CAMKK2	Calcium/calmodulin-dependent protein kinase kinase 2
[R].LFVGSIPK.[NS]	O43390 1xPhospho [S252]	O43390	O43390 [248-255]	1.16512	HNRNPR	Heterogeneous nuclear ribonucleoprotein R
[R].LFVGSIPK.[NS]	O60506 1xPhospho [S249]	O60506	O60506 [245-252]	1.16512	SYNCRIP	Heterogeneous nuclear ribonucleoprotein Q
[R].SAFTPATATGSSPSPVLGQGEK.[V]	Q15811 2xPhospho [S902;S]	Q15811	Q15811 [891-912]	1.16359	ITSN1	Intersectin-1
[R].RLSDSPVFDAPPSPPDSLSDR.[D]	P47974 1xPhospho [S438]	P47974	P47974 [436-456]	1.15817	ZFP36L2	mRNA decay activator protein ZFP36L2
[R].SSELLVR.[K]	Q9NSK0 1xPhospho [S565]	Q9NSK0	Q9NSK0 [565-571]	1.15675	KLC4	Kinesin light chain 4
[R].KPSVGVPPPASPSYPR.[A]	Q9P206 1xPhospho [S]	Q9P206	Q9P206 [969-984]	1.15513	KIAA1522	Uncharacterized protein KIAA1522
[R].RPILQLSPPGPR.[G]	Q8N3X1 1xPhospho [S18]	Q8N3X1	Q8N3X1 [12-23]	1.15418	FNBP4	Formin-binding protein 4
[R].RDSFIGTPYWMAPEVVMCETSK.[D]	Q9H2G2 1xPhospho [S189]	Q9H2G2	Q9H2G2 [187-208]	1.15337	SLK	STE20-like serine/threonine-protein kinase
[R].RISFSASHR.[L]	Q03393 1xPhospho [S19]	Q03393	Q03393 [17-25]	1.15282	PTS	6-pyruvoyl tetrahydrobiopterin synthase
[K].TSDVNETQPPQSE.[-]	P35580 1xPhospho [S1975]	P35580	P35580 [1964-1976]	1.15245	MYH10	Myosin-10
[R].GTPGPDSSGSLGSGEFTGVK.[E]	Q9UBC2 1xPhospho [T/S]	Q9UBC2	Q9UBC2 [365-384]	1.15199	EPS15L1	Epidermal growth factor receptor substrate 15-like 1
[K].AKSESLELPQAAPPQIYHEK.[Q]	Q15040 1xPhospho [S]	Q15040	Q15040 [11-30]	1.15137	JOSD1	Josephin-1
[K].FICVTPTTCSNTIDLPMSPR.[T]	P40763 1xPhospho [S]	P40763	P40763 [710-729]	1.14552	STAT3	Signal transducer and activator of transcription 3
[K].ADTSSQGALVFLSK.[D]	Q7Z417 1xPhospho [S/T]	Q7Z417	Q7Z417 [604-617]	1.14348	NUFIP2	Nuclear fragile X mental retardation-interacting protein 2
[K].LSSPIDMTSK.[R]	Q16649 1xPhospho [S]	Q16649	Q16649 [351-360]	1.14311	NFIL3	Nuclear factor interleukin-3-regulated protein
[R].QPSPSHDGSLSPLQDR.[A]	Q96A00 1xPhospho [S]	Q96A00	Q96A00 [126-141]	1.14182	PPP1R14A	Protein phosphatase 1 regulatory subunit 14A
[R].SQSFSEAEPQLPPAPVR.[G]	Q9HBL0 1xPhospho [S]	Q9HBL0	Q9HBL0 [619-635]	1.14065	TNS1	Tensin-1
[R].TPGTPGTPSYPR.[T]	P11137 1xPhospho [T]	P11137	P11137 [1613-1624]	1.1405	MAP2	Microtubule-associated protein 2
[K].EYPSPPPSPLRR.[G]	Q9HCD6 2xPhospho [S1530;S1534]	Q9HCD6	Q9HCD6 [1527-1538]	1.13892	TANC2	Protein TANC2
[K].VSGPDLDLNLK.[G]	Q09666 1xPhospho [S5298]	Q09666	Q09666 [5297-5307]	1.13706	AHNAK	Neuroblast differentiation-associated protein AHNAK
[R].ASPAPGSGHPEGPGAHLDMNSLDR.[A]	O94826 1xPhospho [S91]	O94826	O94826 [90-113]	1.13616	TOMM70	Mitochondrial import receptor subunit TOM70
[K].QTPMASSPRPK.[M]	Q5SSJ5 1xPhospho [S]	Q5SSJ5	Q5SSJ5 [150-160]	1.13584	HP1BP3	Heterochromatin protein 1-binding protein 3
[R].RPSSMYSTGGK.[R]	O75382 1xPhospho [S]	O75382	O75382 [452-462]	1.13565	TRIM3	Tripartite motif-containing protein 3
[R].LKSLNANTDITSLAR.[K]	Q92845 1xPhospho [S60]	Q92845	Q92845 [58-72]	1.13315	KIFAP3	Kinesin-associated protein 3
[R].KTSGLVSLHSR.[R]	Q13237 1xPhospho [S110]	Q13237	Q13237 [108-118]	1.13281	PRKG2	cGMP-dependent protein kinase 2
[R].MSADMSEIEAR.[I]	O43318 1xPhospho [S389]	O43318	O43318 [388-398]	1.13065	MAP3K7	Mitogen-activated protein kinase kinase kinase 7
[K].EVGWVQQVPNATTPPATLPSSGP.[-]	Q8WWM9 1xPhospho [T]	Q8WWM9	Q8WWM9 [168-190]	1.12909	CYGB	Cytoglobin
[R].AQGVRSPLLR.[Q]	O60343 1xPhospho [S666]	O60343	O60343 [661-670]	1.12712	TBC1D4	TBC1 domain family member 4
[R].QRSPSPAPAPAPAAAAGPPTR.[K]	Q9H7N4 2xPhospho [S498;S500]	Q9H7N4	Q9H7N4 [496-516]	1.12585	SCAF1	Splicing factor, arginine/serine-rich 19
[K].RPISDDDCPSASK.[V]	Q96PU4 1xPhospho [S667]	Q96PU4	Q96PU4 [664-676]	1.12475	UHRF2	E3 ubiquitin-protein ligase UHRF2
[R].KPPLSPAQTNPVVQR.[R]	Q8IY33 1xPhospho [S153]	Q8IY33	Q8IY33 [149-163]	1.1241	MICALL2	MICAL-like protein 2
[R].TLENSPISSCDTSDTEGPVPVNSAAVLK.[K]	Q8N556 1xPhospho [S/T]	Q8N556	Q8N556 [675-702]	1.12328	AFAP1	Actin filament-associated protein 1
[K].RPASPSSPEHLPATPAESPAQR.[F]	Q9H7L9 2xPhospho [S234;S236]	Q9H7L9	Q9H7L9 [231-252]	1.12242	SUDS3	Sin3 histone deacetylase corepressor complex component SDS3
[R].TTSRSPVLSR.[R]	O95819 1xPhospho [S]	O95819	O95819 [627-636]	1.12122	MAP4K4	Mitogen-activated protein kinase kinase kinase kinase 4
[R].ENSPAAFPDR.[E]	Q9Y5B0 1xPhospho [S740]	Q9Y5B0	Q9Y5B0 [738-747]	1.1189	CTDP1	RNA polymerase II subunit A C-terminal domain phosphatase
[K].EERSPQTLAPVGEDAMK.[T]	Q92797 1xPhospho [S1243]	Q92797	Q92797 [1240-1256]	1.11648	SYMPK	Symplekin
[K].IPGTPGAGGRLSPENNQVLTK.[K]	Q16514 1xPhospho [S51]	Q16514	Q16514 [40-60]	1.11516	TAF12	Transcription initiation factor TFIID subunit 12
[R].GSSDGFIVPPNK.[D]	Q9HAR2 1xPhospho [S]	Q9HAR2	Q9HAR2 [1417-1428]	1.11389	ADGRL3	Adhesion G protein-coupled receptor L3
[K].EDNSEGEEILEEVGGDLEEEDDHHMEFCR.[V]	Q14839 1xPhospho [S428]	Q14839	Q14839 [425-453]	1.11054	CHD4	Chromodomain-helicase-DNA-binding protein 4
[R].RSTQGVTLTDLQEAEK.[T]	O14974 1xPhospho [T/S]	O14974	O14974 [694-709]	1.11045	PPP1R12A	Protein phosphatase 1 regulatory subunit 12A
[R].STDSPVPGSEDDLVAGATLHSPEWSEER.[F]	Q9H694 1xPhospho [S26]	Q9H694	Q9H694 [23-50]	1.10699	BICC1	Protein bicaudal C homolog 1
[R].GGFDSPFYR.[D]	Q92574 1xPhospho [S505]	Q92574	Q92574 [501-509]	1.10596	TSC1	Hamartin
[R].RWSAEVTSSTYSDEDRPPK.[V]	Q9UJM3 1xPhospho [S/T/Y]	Q9UJM3	Q9UJM3 [300-318]	1.10469	ERRFI1	ERBB receptor feedback inhibitor 1
[K].ELVGPPLAETVFTPK.[T]	P49792 1xPhospho [T1396]	P49792	P49792 [1384-1398]	1.10418	RANBP2	E3 SUMO-protein ligase RanBP2
[R].RPSYTLGMK.[S]	O43166 1xPhospho [S1632]	O43166	O43166 [1630-1638]	1.10413	SIPA1L1	Signal-induced proliferation-associated 1-like protein 1
[R].RTSIHDFLTK.[D]	Q3V6T2 1xPhospho [S/T]	Q3V6T2	Q3V6T2 [1818-1827]	1.10405	CCDC88A	Girdin
[K].VSSPVASGMSSPSGGSTVSFSHTLPDFSK.[Y]	Q9HBL0 1xPhospho [S/T]	Q9HBL0	Q9HBL0 [1411-1439]	1.10345	TNS1	Tensin-1
[R].VDSLVSLSEEDLESDQR.[E]	Q12802 1xPhospho [S]	Q12802	Q12802 [1640-1656]	1.10137	AKAP13	A-kinase anchor protein 13

## Sheet: down
List of significantly downregulated phosphopeptides
Annotated Sequence	Modifications in Master Proteins	Master Protein Accessions	Positions in Master Proteins	Fold change	Gene name	Protein names	Novel site
[K].GEAEQSEEEADEEDKAEDAREEEYEPEK.[M]	P46821 1xPhospho [S1016]	P46821	P46821 [1011-1038]	0.501998	MAP1B	Microtubule-associated protein 1B
[K].ALGVISNFQSSPK.[Y]	O94876 1xPhospho [S]	O94876	O94876 [404-416]	0.560178	TMCC1	Transmembrane and coiled-coil domains protein 1
[R].WNTLNK.[K]	Q9UPN3 1xPhospho [T5327]	Q9UPN3	Q9UPN3 [5325-5330]	0.575319	MACF1	Microtubule-actin cross-linking factor 1, isoforms 1/2/3/4/5	Yes
[K].EEDCHSPTSKPPKPDQPLK.[V]	P23588 1xPhospho [S459]	P23588	P23588 [454-472]	0.595154	EIF4B	Eukaryotic translation initiation factor 4B
[R].ENSTVDFSK.[VG]	Q9Y6M7 1xPhospho [T/S]	Q9Y6M7	Q9Y6M7 [405-413]	0.606407	SLC4A7	Sodium bicarbonate cotransporter 3
[R].SPEDQLGK.[H]	Q9UK61 1xPhospho [S927]	Q9UK61	Q9UK61 [927-934]	0.625588	TASOR	Protein TASOR
[R].QPSEEEIIK.[L]	Q15121 1xPhospho [S116]	Q15121	Q15121 [114-122]	0.631979	PEA15	Astrocytic phosphoprotein PEA-15
[R].HELSPPQK.[R]	Q9BXP5 1xPhospho [S74]	Q9BXP5	Q9BXP5 [71-78]	0.632571	SRRT	Serrate RNA effector molecule homolog
[R].EENLPDENEEQKQSNQK.[Q]	O00461 1xPhospho [S583]	O00461	O00461 [570-586]	0.634523	GOLIM4	Golgi integral membrane protein 4
[K].EEPSPVKAEVAEK.[Q]	P46821 1xPhospho [S614]	P46821	P46821 [611-623]	0.643968	MAP1B	Microtubule-associated protein 1B
[K].DLGHPVEEEDELESGDQEDEDDESEDPGK.[D]	O60763 1xPhospho [S942]	O60763	O60763 [929-957]	0.64652	USO1	General vesicular transport factor p115
[K].IHSPIIR.[S]	O60885 1xPhospho [S1117]	O60885	O60885 [1115-1121]	0.649087	BRD4	Bromodomain-containing protein 4
[R].ASDPGLPAEEPK.[E]	P27708 1xPhospho [S1859]	P27708	P27708 [1858-1869]	0.651473	CAD	CAD protein [Includes: Glutamine-dependent carbamoyl-phosphate synthase
[R].SGSGNFGGGR.[G]	P09651 1xPhospho [S199]	P09651	P09651 [197-206]	0.65509	HNRNPA1	Heterogeneous nuclear ribonucleoprotein A1
[R].DNSPEPNDPEEPQEVSSTPSDK.[K]	Q9HB58 1xPhospho [S256]	Q9HB58	Q9HB58 [254-275]	0.659827	SP110	Sp110 nuclear body protein
[K].AGAEDDEEKGEGTPR.[E]	Q86VM9 1xPhospho [T162]	Q86VM9	Q86VM9 [150-164]	0.659909	ZC3H18	Zinc finger CCCH domain-containing protein 18
[R].RGSGHPAYAEVEPVGEK.[E]	Q6UX71 1xPhospho [S506]	Q6UX71	Q6UX71 [504-520]	0.66567	PLXDC2	Plexin domain-containing protein 2
[K].LSGFSFK.[K]	P29966 1xPhospho [S170]	P29966	P29966 [166-172]	0.6664	MARCKS	Myristoylated alanine-rich C-kinase substrate
[K].ESEELLK.[S]	O43303 1xPhospho [S641]	O43303	O43303 [640-646]	0.669323	CCP110	Centriolar coiled-coil protein of 110 kDa
[R].SSTSPCGTSK.[S]	O75376 1xPhospho [S992]	O75376	O75376 [989-998]	0.671516	NCOR1	Nuclear receptor corepressor 1
[R].NSPSAASTSSNDSK.[A]	Q9P2R6 1xPhospho [S613]	Q9P2R6	Q9P2R6 [612-625]	0.673275	RERE	Arginine-glutamic acid dipeptide repeats protein
[R].AVVVSPK.[E]	O75909 1xPhospho [S340]	O75909	O75909 [336-342]	0.676518	CCNK	Cyclin-K
[K].DGFPSGTPALNAK.[G]	Q13177 1xPhospho [S/T]	Q13177	Q13177 [148-160]	0.6823	PAK2	Serine/threonine-protein kinase PAK 2
[K].LLVDSQGLSGCSPR.[D]	O94885 1xPhospho [S721]	O94885	O94885 [710-723]	0.68387	SASH1	SAM and SH3 domain-containing protein 1
[K].EEPLSEEEPCTSTAIASPEK.[K]	Q9Y2X3 2xPhospho [S502;S509]	Q9Y2X3	Q9Y2X3 [498-517]	0.684634	NOP58	Nucleolar protein 58
[K].SLSTEVEPK.[E]	Q8IWB9 1xPhospho [S/T]	Q8IWB9	Q8IWB9 [194-202]	0.686937	TEX2	Testis-expressed protein 2
[R].FSPPPVGGQGK.[E]	Q9HCD6 1xPhospho [S1517]	Q9HCD6	Q9HCD6 [1516-1526]	0.687382	TANC2	Protein TANC2
[R].EDSGTFSLGK.[M]	O75569 1xPhospho [S/T]	O75569	O75569 [16-25]	0.691388	PRKRA	Interferon-inducible double-stranded RNA-dependent protein kinase activator A
[K].QQQEPTGEPSPK.[R]	P52926 1xPhospho [S44]	P52926	P52926 [35-46]	0.6935	HMGA2	High mobility group protein HMGI-C
[K].SPEPEVLSTQEDLFDQSNK.[T]	Q12888 1xPhospho [S294]	Q12888	Q12888 [294-312]	0.693798	TP53BP1	TP53-binding protein 1
[R].VSPPPPSDTSSK.[D]	O43623 1xPhospho [S87]	O43623	O43623 [86-97]	0.69451	SNAI2	Zinc finger protein SNAI2
[R].VHSPCPTSGSEK.[K]	Q96LT9 1xPhospho [S108]	Q96LT9	Q96LT9 [106-117]	0.701959	RNPC3	RNA-binding region-containing protein 3
[R].LTPVSPESSSTEEK.[S]	Q13501 1xPhospho [S272]	Q13501	Q13501 [268-281]	0.703435	SQSTM1	Sequestosome-1
[K].QPSSPYEDK.[D]	Q9UQ35 1xPhospho [S333]	Q9UQ35	Q9UQ35 [330-338]	0.703758	SRRM2	Serine/arginine repetitive matrix protein 2
[K].ISMQDVDLSLGSPK.[L]	Q09666 1xPhospho [S511]	Q09666	Q09666 [500-513]	0.705278	AHNAK	Neuroblast differentiation-associated protein AHNAK
[R].SPDEEDYDYESYEK.[T]	P46821 1xPhospho [S1881]	P46821	P46821 [1881-1894]	0.708293	MAP1B	Microtubule-associated protein 1B
[K].SSSLGNLK.[K]	Q86W92 1xPhospho [S466]	Q86W92	Q86W92 [464-471]	0.709655	PPFIBP1	Liprin-beta-1
[R].TPTQPLLESGFR.[S]	Q9HBL0 1xPhospho [T]	Q9HBL0	Q9HBL0 [1105-1116]	0.710252	TNS1	Tensin-1
[R].SGEGEVSGLMR.[K]	Q13263 1xPhospho [S473]	Q13263	Q13263 [473-483]	0.715138	TRIM28	Transcription intermediary factor 1-beta
[R].QSGDGQESTEPVENK.[V]	O15234 1xPhospho [S148]	O15234	O15234 [147-161]	0.715357	CASC3	Protein CASC3
[K].SDGAPASDSKPGSSEAAPSSK.[E]	P80723 1xPhospho [S177]	P80723	P80723 [164-184]	0.717785	BASP1	Brain acid soluble protein 1
[R].EESDGEYDEFGR.[K]	O95218 1xPhospho [S120]	O95218	O95218 [118-129]	0.718271	ZRANB2	Zinc finger Ran-binding domain-containing protein 2
[R].SNSNSSSVITTEDNK.[I]	Q4L180 1xPhospho [S]	Q4L180	Q4L180 [1047-1061]	0.718964	FILIP1L	Filamin A-interacting protein 1-like
[K].EEPLSEEEPCTSTAIASPEKK.[K]	Q9Y2X3 2xPhospho [S514;T/S]	Q9Y2X3	Q9Y2X3 [498-518]	0.719106	NOP58	Nucleolar protein 58
[K].SPSWMSK.[S]	Q8WYL5 1xPhospho [S1042]	Q8WYL5	Q8WYL5 [1042-1048]	0.722639	SSH1	Protein phosphatase Slingshot homolog 1
[K].QEDTENHPKTPESAPENK.[D]	Q96T58 1xPhospho [T1619]	Q96T58	Q96T58 [1610-1627]	0.72282	SPEN	Msx2-interacting protein
[K].KESSSMLATVK.[E]	P28290 1xPhospho [S352]	P28290	P28290 [350-360]	0.724225	ITPRID2	Protein ITPRID2
[R].ASPGGVSTSSSDGK.[A]	P54259 1xPhospho [S34]	P54259	P54259 [33-46]	0.724243	ATN1	Atrophin-1
[K].DYNASASTISPPSSMEEDK.[F]	P46821 1xPhospho [S/T]	P46821	P46821 [1199-1217]	0.724599	MAP1B	Microtubule-associated protein 1B
[R].SAEEGELAESK.[S]	Q9C0C2 1xPhospho [S1666]	Q9C0C2	Q9C0C2 [1666-1676]	0.72693	TNKS1BP1	182 kDa tankyrase-1-binding protein
[R].RDSDGVDGFEAEGK.[K]	Q96KR1 1xPhospho [S1054]	Q96KR1	Q96KR1 [1052-1065]	0.727243	ZFR	Zinc finger RNA-binding protein
[R].NYQQNYQNSESGEK.[N]	P67809 1xPhospho [S]	P67809	P67809 [157-170]	0.728796	YBX1	Y-box-binding protein 1
[R].SSSETILSSLAGSDIVK.[G]	Q01850 1xPhospho [S/T]	Q01850	Q01850 [309-325]	0.730383	CDR2	Cerebellar degeneration-related protein 2
[R].SPSEAADEVCALEEK.[E]	Q9H6Z4 1xPhospho [S219]	Q9H6Z4	Q9H6Z4 [219-233]	0.730717	RANBP3	Ran-binding protein 3
[K].AKPVGSPLFK.[F]	Q92576 1xPhospho [S283]	Q92576	Q92576 [278-287]	0.731283	PHF3	PHD finger protein 3
[R].VTQGAASPGHGIQEK.[L]	Q9HB58 1xPhospho [S380]	Q9HB58	Q9HB58 [374-388]	0.732002	SP110	Sp110 nuclear body protein
[R].SVGDGETVEFDVVEGEK.[G]	P16989 1xPhospho [S134]	P16989	P16989 [134-150]	0.733472	YBX3	Y-box-binding protein 3
[R].SVGDGETVEFDVVEGEK.[G]	P67809 1xPhospho [S102]	P67809	P67809 [102-118]	0.733472	YBX1	Y-box-binding protein 1
[K].EVPWSPSAEK.[A]	Q5JSZ5 1xPhospho [S556]	Q5JSZ5	Q5JSZ5 [552-561]	0.738276	PRRC2B	Protein PRRC2B
[K].IESDVQEPTEPEDDLDIMLGNK.[K]	P20042 1xPhospho [T/S]	P20042	P20042 [103-124]	0.738779	EIF2S2	Eukaryotic translation initiation factor 2 subunit 2
[K].QETVADFTPK.[K]	O75400 1xPhospho [T373]	O75400	O75400 [366-375]	0.739723	PRPF40A	Pre-mRNA-processing factor 40 homolog A
[K].EETPGTPK.[K]	Q99442 1xPhospho [T158]	Q99442	Q99442 [153-160]	0.740236	SEC62	Translocation protein SEC62
[R].SQLDDHPESDDEENFIDANDDEDMEK.[F]	Q03701 1xPhospho [S629]	Q03701	Q03701 [621-646]	0.740868	CEBPZ	CCAAT/enhancer-binding protein zeta
[K].DLFDYSPPLHK.[N]	Q9NYF8 1xPhospho [S/Y]	Q9NYF8	Q9NYF8 [507-517]	0.741759	BCLAF1	Bcl-2-associated transcription factor 1
[R].QQLSEEEK.[A]	Q8WVC0 1xPhospho [S205]	Q8WVC0	Q8WVC0 [202-209]	0.74328	LEO1	RNA polymerase-associated protein LEO1
[R].SLSELESLK.[L]	P22059 1xPhospho [S240]	P22059	P22059 [238-246]	0.745578	OSBP	Oxysterol-binding protein 1
[R].YPSSISSSPQK.[D]	Q14157 1xPhospho [S]	Q14157	Q14157 [602-612]	0.748832	UBAP2L	Ubiquitin-associated protein 2-like
[K].LFEDDDSNEK.[L]	O43719 1xPhospho [S702]	O43719	O43719 [696-705]	0.749214	HTATSF1	HIV Tat-specific factor 1
[R].SDPLLIGIPTSENPFK.[D]	Q9UBI6 1xPhospho [S49]	Q9UBI6	Q9UBI6 [49-64]	0.750363	GNG12	Guanine nucleotide-binding protein G
[R].CVSVQTDPTDEIPTK.[K]	P18583 1xPhospho [S94]	P18583	P18583 [92-106]	0.753383	SON	Protein SON
[R].SLEEDLETLK.[S]	P48681 1xPhospho [S578]	P48681	P48681 [578-587]	0.758023	NES	Nestin
[K].YESQLSTNEEK.[V]	Q13433 1xPhospho [S/T]	Q13433	Q13433 [473-483]	0.758438	SLC39A6	Zinc transporter ZIP6
[R].SFPDIEDEEK.[F]	Q5VUA4 1xPhospho [S527]	Q5VUA4	Q5VUA4 [527-536]	0.758693	ZNF318	Zinc finger protein 318
[R].SGSSSPDSEITELK.[F]	P17812 2xPhospho [S]	P17812	P17812 [571-584]	0.759702	CTPS1	CTP synthase 1
[K].DRPSESDELQTIQEDSAATSESLDVMASQK.[R]	P02686 1xPhospho [S]	P02686	P02686 [109-138]	0.760122	MBP	Myelin basic protein
[R].KRTEEPDRDER.[L]	O95232 1xPhospho [T238]	O95232	O95232 [236-246]	0.760211	LUC7L3	Luc7-like protein 3
[R].SPSPEPIYNSEGK.[R]	Q15637 2xPhospho [S80;S82]	Q15637	Q15637 [80-92]	0.761036	SF1	Splicing factor 1
[K].VEQATKPSFESGR.[R]	P38159 1xPhospho [S88]	P38159	P38159 [81-93]	0.761251	RBMX	RNA-binding motif protein, X chromosome
[K].VISGTTLGYLSPK.[D]	Q9NUL3 1xPhospho [S440]	Q9NUL3	Q9NUL3 [430-442]	0.761278	STAU2	Double-stranded RNA-binding protein Staufen homolog 2
[K].KEESEESDDDMGFGLFD.[-]	P05387 1xPhospho [S105]	P05387	P05387 [99-115]	0.762994	RPLP2	60S acidic ribosomal protein P2
[R].SPLELEPEAK.[K]	Q92466 1xPhospho [S26]	Q92466	Q92466 [26-35]	0.764682	DDB2	DNA damage-binding protein 2
[R].EGSPAPLEPEPGAAQPK.[L]	Q01167 1xPhospho [S398]	Q01167	Q01167 [396-412]	0.764714	FOXK2	Forkhead box protein K2
[R].RVSEVEEEKEPVPQPLPSDDTR.[V]	O43290 1xPhospho [S448]	O43290	O43290 [446-467]	0.765651	SART1	U4/U6.U5 tri-snRNP-associated protein 1
[K].YGGSVGSQPPPVAPEPGPVPSSPSQEPPTK.[R]	Q04323 1xPhospho [S200]	Q04323	Q04323 [179-208]	0.765753	UBXN1	UBX domain-containing protein 1
[R].SQQQPTPVTPK.[K]	O95251 1xPhospho [T88]	O95251	O95251 [80-90]	0.767353	KAT7	Histone acetyltransferase KAT7
[K].SPALSDANK.[A]	P52701 1xPhospho [S14]	P52701	P52701 [14-22]	0.767575	MSH6	DNA mismatch repair protein Msh6
[R].DLQSPDFTTGFHSDK.[I]	Q9P2D0 1xPhospho [S1045]	Q9P2D0	Q9P2D0 [1042-1056]	0.770595	IBTK	Inhibitor of Bruton tyrosine kinase
[R].HSPTPQQSNR.[T]	Q8IYB3 1xPhospho [S414]	Q8IYB3	Q8IYB3 [413-422]	0.772714	SRRM1	Serine/arginine repetitive matrix protein 1
[R].SPGLPMSDLK.[T]	Q6WCQ1 1xPhospho [S619]	Q6WCQ1	Q6WCQ1 [619-628]	0.77345	MPRIP	Myosin phosphatase Rho-interacting protein
[K].EEPLSEEEPCTSTAIASPEK.[K]	Q9Y2X3 1xPhospho [S502]	Q9Y2X3	Q9Y2X3 [498-517]	0.773663	NOP58	Nucleolar protein 58
[R].SSPQLDPLRK.[S]	Q8ND56 1xPhospho [S]	Q8ND56	Q8ND56 [182-191]	0.775175	LSM14A	Protein LSM14 homolog A
[K].SQEMVHLVNK.[E]	P16070 1xPhospho [S706]	P16070	P16070 [706-715]	0.775471	CD44	CD44 antigen
[K].EYAENIGDGRSPEFR.[E]	Q8WYA6 1xPhospho [S545]	Q8WYA6	Q8WYA6 [535-549]	0.775957	CTNNBL1	Beta-catenin-like protein 1
[R].LSPIPEEVPK.[S]	Q96T23 1xPhospho [S604]	Q96T23	Q96T23 [603-612]	0.776753	RSF1	Remodeling and spacing factor 1
[-].MIPLEKPGSGGSSPGATSGSGR.[A]	Q9UEE5 1xPhospho [S]	Q9UEE5	Q9UEE5 [1-22]	0.777289	STK17A	Serine/threonine-protein kinase 17A
[R].SGGLQTPECLSR.[E]	P85037 1xPhospho [S441]	P85037	P85037 [431-442]	0.779679	FOXK1	Forkhead box protein K1
[R].SPALKSPLQSVVVR.[R]	Q9Y2W1 1xPhospho [S253]	Q9Y2W1	Q9Y2W1 [248-261]	0.779868	THRAP3	Thyroid hormone receptor-associated protein 3
[R].TPEEGGYSYDISEK.[T]	P46821 1xPhospho [T1949]	P46821	P46821 [1949-1962]	0.779998	MAP1B	Microtubule-associated protein 1B
[K].AEDEALLSEEDDPIDR.[R]	Q04721 1xPhospho [S1778]	Q04721	Q04721 [1771-1786]	0.780034	NOTCH2	Neurogenic locus notch homolog protein 2
[K].DMSPLSETEMALGK.[D]	P27816 2xPhospho [S507;S510]	P27816	P27816 [505-518]	0.78048	MAP4	Microtubule-associated protein 4
[K].AEAPLPSPK.[L]	Q09666 1xPhospho [S5110]	Q09666	Q09666 [5104-5112]	0.782076	AHNAK	Neuroblast differentiation-associated protein AHNAK
[R].AQTLPTSVVTITSESSPGK.[R]	Q01082 1xPhospho [S/T]	Q01082	Q01082 [2326-2344]	0.78308	SPTBN1	Spectrin beta chain, non-erythrocytic 1
[K].SPSSKPSLAVAVDSAPEVAVK.[E]	O60508 1xPhospho [S]	O60508	O60508 [43-63]	0.783725	CDC40	Pre-mRNA-processing factor 17
[R].QIASDSPHASPK.[H]	Q9HCD6 1xPhospho [S400]	Q9HCD6	Q9HCD6 [395-406]	0.784025	TANC2	Protein TANC2
[K].YESQLSTNEEKVDTDDR.[T]	Q13433 1xPhospho [T/S]	Q13433	Q13433 [473-489]	0.78484	SLC39A6	Zinc transporter ZIP6
[R].SVSPPPK.[R]	Q13247 2xPhospho [S314;S316]	Q13247	Q13247 [314-320]	0.785261	SRSF6	Serine/arginine-rich splicing factor 6
[RK].SPSLSSK.[HQ]	Q8IYB3 1xPhospho [S653]	Q8IYB3	Q8IYB3 [653-659]	0.785884	SRRM1	Serine/arginine repetitive matrix protein 1
[RK].SPSLSSK.[HQ]	Q9UPU5 1xPhospho [S1141]	Q9UPU5	Q9UPU5 [1141-1147]	0.785884	USP24	Ubiquitin carboxyl-terminal hydrolase 24
[R].SQEDLNEPIK.[R]	Q7Z460 1xPhospho [S1196]	Q7Z460	Q7Z460 [1196-1205]	0.786593	CLASP1	CLIP-associating protein 1
[R].TQPSSGVDSAVGTLPATSPQSTSVQAK.[G]	Q13428 1xPhospho [T/S]	Q13428	Q13428 [1094-1120]	0.786826	TCOF1	Treacle protein
[R].VSSPLPSPSAMTDAANSQAAAK.[L]	Q8WXI9 1xPhospho [S]	Q8WXI9	Q8WXI9 [332-353]	0.786827	GATAD2B	Transcriptional repressor p66-beta
[K].APIDTSDVEEK.[A]	Q06265 1xPhospho [S/T]	Q06265	Q06265 [301-311]	0.787922	EXOSC9	Exosome complex component RRP45
[R].KQSPAYMK.[E]	Q9UKS7 1xPhospho [S433]	Q9UKS7	Q9UKS7 [431-438]	0.788509	IKZF2	Zinc finger protein Helios
[R].LDIDSPPITAR.[N]	P14618 1xPhospho [S37]	P14618	P14618 [33-43]	0.788602	PKM	Pyruvate kinase PKM
[K].RASPSKPASAPASR.[S]	P27816 1xPhospho [S787]	P27816	P27816 [785-798]	0.789093	MAP4	Microtubule-associated protein 4
[R].SRLTPVSPESSSTEEK.[S]	Q13501 2xPhospho [S266;S272]	Q13501	Q13501 [266-281]	0.79065	SQSTM1	Sequestosome-1
[R].SLMSSPEDLTK.[D]	P46821 2xPhospho [S831;S832]	P46821	P46821 [828-838]	0.792365	MAP1B	Microtubule-associated protein 1B
[K].LSVHDMKPLDSPGR.[R]	Q15643 1xPhospho [S1891]	Q15643	Q15643 [1881-1894]	0.792593	TRIP11	Thyroid receptor-interacting protein 11
[R].SQEIEELER.[F]	O43310 1xPhospho [S18]	O43310	O43310 [18-26]	0.794003	CTIF	CBP80/20-dependent translation initiation factor
[R].FLPSPVVIK.[K]	Q13618 1xPhospho [S737]	Q13618	Q13618 [734-742]	0.797936	CUL3	Cullin-3	Yes
[K].SSSVSPSSWK.[S]	Q96JM3 1xPhospho [S376]	Q96JM3	Q96JM3 [372-381]	0.798156	CHAMP1	Chromosome alignment-maintaining phosphoprotein 1
[R].LYSSEESRPYTNK.[V]	Q14004 1xPhospho [T871]	Q14004	Q14004 [861-873]	0.800868	CDK13	Cyclin-dependent kinase 13
[K].SLLDASEEAIK.[K]	P18206 1xPhospho [S721]	P18206	P18206 [721-731]	0.801489	VCL	Vinculin
[R].EDEISPPPPNPVVK.[G]	P10644 1xPhospho [S83]	P10644	P10644 [79-92]	0.80501	PRKAR1A	cAMP-dependent protein kinase type I-alpha regulatory subunit
[K].FVPAENDSILMNPAQDGEVQLSQNDDK.[T]	Q12888 1xPhospho [S580]	Q12888	Q12888 [559-585]	0.806789	TP53BP1	TP53-binding protein 1
[R].YEDDGISDDEIEGK.[R]	Q9Y2K7 1xPhospho [S28]	Q9Y2K7	Q9Y2K7 [22-35]	0.80839	KDM2A	Lysine-specific demethylase 2A
[R].TPPKSPATPK.[Q]	P11137 1xPhospho [S/T]	P11137	P11137 [1649-1658]	0.808593	MAP2	Microtubule-associated protein 2
[K].GAAEEAELEDSDDEEKPVK.[Q]	Q9UBB9 1xPhospho [S98]	Q9UBB9	Q9UBB9 [88-106]	0.809119	TFIP11	Tuftelin-interacting protein 11
[K].AQTPPGPSLSGSK.[S]	Q9UQ35 1xPhospho [T1003]	Q9UQ35	Q9UQ35 [1001-1013]	0.809843	SRRM2	Serine/arginine repetitive matrix protein 2
[R].RLSQPESAEK.[H]	Q9UKV3 1xPhospho [S710]	Q9UKV3	Q9UKV3 [708-717]	0.810754	ACIN1	Apoptotic chromatin condensation inducer in the nucleus
[R].SGDETPGSEVPGDK.[A]	Q1KMD3 1xPhospho [T/S]	Q1KMD3	Q1KMD3 [161-174]	0.811007	HNRNPUL2	Heterogeneous nuclear ribonucleoprotein U-like protein 2
[R].APSPPPTASNSSNSQSEK.[E]	Q8N108 1xPhospho [S377]	Q8N108	Q8N108 [375-392]	0.811499	MIER1	Mesoderm induction early response protein 1
[K].QGSPDQVSPVSEMTSTSLYQDK.[Q]	P46821 2xPhospho [S1438;S1443]	P46821	P46821 [1436-1457]	0.81281	MAP1B	Microtubule-associated protein 1B
[R].SAGGSSPEGGEDSDREDGNYCPPVK.[R]	Q9H6Z4 1xPhospho [S108]	Q9H6Z4	Q9H6Z4 [96-120]	0.813234	RANBP3	Ran-binding protein 3
[R].SSPSARPPDVPGQQPQAAK.[S]	Q96JP5 1xPhospho [S]	Q96JP5	Q96JP5 [82-100]	0.813342	ZFP91	E3 ubiquitin-protein ligase ZFP91
[K].LSSQISAGEEK.[W]	Q86UE4 1xPhospho [S298]	Q86UE4	Q86UE4 [293-303]	0.815196	MTDH	Protein LYRIC
[K].DELHIVEAEAMNYEGSPIK.[V]	P06748 1xPhospho [S70]	P06748	P06748 [55-73]	0.815676	NPM1	Nucleophosmin
[K].VSPLTFGR.[K]	O95810 1xPhospho [S293]	O95810	O95810 [292-299]	0.818096	CAVIN2	Caveolae-associated protein 2
[R].ADSEYTDK.[L]	P29323 1xPhospho [S575]	P29323	P29323 [573-580]	0.818486	EPHB2	Ephrin type-B receptor 2
[R].SDDTLDEEDSFVMK.[A]	P53355 1xPhospho [S333]	P53355	P53355 [333-346]	0.819386	DAPK1	Death-associated protein kinase 1
[R].QGSEIQDSPDFR.[I]	Q8WX93 1xPhospho [S479]	Q8WX93	Q8WX93 [477-488]	0.819497	PALLD	Palladin
[K].EGPVASPPFMDLEQAVLPAVIPK.[K]	Q9H4A3 1xPhospho [S1978]	Q9H4A3	Q9H4A3 [1973-1995]	0.820157	WNK1	Serine/threonine-protein kinase WNK1
[K].EPSPPIDEVINTPR.[V]	O60684 1xPhospho [S113]	O60684	O60684 [111-124]	0.820631	KPNA6	Importin subunit alpha-7
[R].VGGSDEEASGIPSR.[T]	Q9NQ55 1xPhospho [S359]	Q9NQ55	Q9NQ55 [356-369]	0.821262	PPAN	Suppressor of SWI4 1 homolog
[K].SPSPPDGSPAATPEIR.[V]	O00499 2xPhospho [S298;S303]	O00499	O00499 [296-311]	0.821878	BIN1	Myc box-dependent-interacting protein 1
[K].EELMSSDLEETAGSTSIPK.[R]	O00567 1xPhospho [S]	O00567	O00567 [515-533]	0.821948	NOP56	Nucleolar protein 56
[K].LASPELER.[L]	P05412 1xPhospho [S73]	P05412	P05412 [71-78]	0.822547	JUN	Transcription factor Jun
[R].NMAPSQQSPVR.[T]	Q9NYB9 1xPhospho [S]	Q9NYB9	Q9NYB9 [220-230]	0.823012	ABI2	Abl interactor 2
[R].HNSASVENVSLR.[K]	Q9Y4H2 1xPhospho [S1176]	Q9Y4H2	Q9Y4H2 [1172-1183]	0.823353	IRS2	Insulin receptor substrate 2
[K].SSSPLPTVQLHPQSPTAGK.[K]	O60245 2xPhospho [S1000;S1011]	O60245	O60245 [998-1016]	0.8245	PCDH7	Protocadherin-7
[R].VSPAAAQLADTLFSK.[G]	O14686 1xPhospho [S4359]	O14686	O14686 [4358-4372]	0.824657	KMT2D	Histone-lysine N-methyltransferase 2D
[K].LNFDMTASPK.[I]	Q9ULU4 1xPhospho [S406]	Q9ULU4	Q9ULU4 [399-408]	0.824822	ZMYND8	Protein kinase C-binding protein 1
[R].ELSPEGPGK.[E]	Q14160 1xPhospho [S1232]	Q14160	Q14160 [1230-1238]	0.825225	SCRIB	Protein scribble homolog
[K].SPLIESTANMDNNQSQK.[T]	O14974 1xPhospho [S299]	O14974	O14974 [299-315]	0.825432	PPP1R12A	Protein phosphatase 1 regulatory subunit 12A
[R].SRESLNVDVVK.[Y]	Q07866 2xPhospho [S521;S524]	Q07866	Q07866 [521-531]	0.825564	KLC1	Kinesin light chain 1
[K].RESVASGDDRAEEDMDEAIEK.[G]	P46821 2xPhospho [S992;S995]	P46821	P46821 [990-1010]	0.826229	MAP1B	Microtubule-associated protein 1B
[K].DSKPSSTPR.[S]	P06748 1xPhospho [T/S]	P06748	P06748 [213-221]	0.827078	NPM1	Nucleophosmin
[K].LQGSGVSLASK.[K]	Q09666 1xPhospho [S]	Q09666	Q09666 [5848-5858]	0.827098	AHNAK	Neuroblast differentiation-associated protein AHNAK
[K].GKSSPICSTTGDDK.[L]	Q12802 1xPhospho [S650]	Q12802	Q12802 [647-660]	0.827152	AKAP13	A-kinase anchor protein 13
[R].QIVDTPPHVAAGLK.[D]	Q96I25 1xPhospho [T71]	Q96I25	Q96I25 [67-80]	0.827779	RBM17	Splicing factor 45
[K].LSPNPPK.[L]	P51531 1xPhospho [S1377]	P51531	P51531 [1376-1382]	0.828733	SMARCA2	Probable global transcription activator SNF2L2
[K].CSPSESPLMEK.[K]	Q8WUM9 1xPhospho [S]	Q8WUM9	Q8WUM9 [264-274]	0.828738	SLC20A1	Sodium-dependent phosphate transporter 1
[R].RLSESQLSFR.[R]	Q96PK6 1xPhospho [S618]	Q96PK6	Q96PK6 [616-625]	0.829093	RBM14	RNA-binding protein 14
[K].QPPVSPGTALVGSQK.[E]	P17096 1xPhospho [S36]	P17096	P17096 [32-46]	0.829181	HMGA1	High mobility group protein HMG-I/HMG-Y
[R].SAASPVVSSMPER.[A]	P18583 1xPhospho [S1769]	P18583	P18583 [1766-1778]	0.83041	SON	Protein SON
[K].SPSDSGYSYETIGK.[T]	P46821 1xPhospho [S]	P46821	P46821 [1915-1928]	0.831571	MAP1B	Microtubule-associated protein 1B
[R].SLENPTPPFTPK.[M]	O15085 1xPhospho [T668]	O15085	O15085 [663-674]	0.831677	ARHGEF11	Rho guanine nucleotide exchange factor 11
[K].EESEESDEDMGFGLFD.[-]	P05388 2xPhospho [S304;S307]	P05388	P05388 [302-317]	0.832499	RPLP0	60S acidic ribosomal protein P0
[R].SRSPPPVSK.[R]	Q01130 2xPhospho [S189;S191]	Q01130	Q01130 [189-197]	0.833649	SRSF2	Serine/arginine-rich splicing factor 2
[R].IESYEGR.[E]	O95772 1xPhospho [Y/S]	O95772	O95772 [37-43]	0.834372	STARD3NL	STARD3 N-terminal-like protein
[R].EDFDSTSSSSSTPPLQPR.[D]	Q13620 1xPhospho [T/S]	Q13620	Q13620 [74-91]	0.835298	CUL4B	Cullin-4B
[R].NPYLLSEEEDDDVDGDVNVEK.[N]	O60524 1xPhospho [S/Y]	O60524	O60524 [412-432]	0.836619	NEMF	Ribosome quality control complex subunit NEMF
[K].LGDVSPTQIDVSQFGSFK.[E]	P46821 1xPhospho [S1501]	P46821	P46821 [1497-1514]	0.838793	MAP1B	Microtubule-associated protein 1B
[R].SSTSGDTEEEEEEEVVPFSSDEQK.[R]	O15231 1xPhospho [S/T]	O15231	O15231 [152-175]	0.839909	ZNF185	Zinc finger protein 185
[K].ALSLEMIQLK.[E]	Q13237 1xPhospho [S431]	Q13237	Q13237 [429-438]	0.840233	PRKG2	cGMP-dependent protein kinase 2
[K].AEGEPQEESPLK.[S]	Q9NYF8 1xPhospho [S177]	Q9NYF8	Q9NYF8 [169-180]	0.840792	BCLAF1	Bcl-2-associated transcription factor 1
[R].QDSLSSEVDTLK.[Q]	Q08378 1xPhospho [S465]	Q08378	Q08378 [463-474]	0.840802	GOLGA3	Golgin subfamily A member 3
[R].TTPATGEQSPGAR.[S]	O00308 1xPhospho [S211]	O00308	O00308 [203-215]	0.841416	WWP2	NEDD4-like E3 ubiquitin-protein ligase WWP2
[K].EDTDHEEKASNEDVTK.[A]	O75475 1xPhospho [S129]	O75475	O75475 [120-135]	0.842435	PSIP1	PC4 and SFRS1-interacting protein
[K].GSSEQAESDNMDVPPEDDSK.[E]	Q12906 1xPhospho [S62]	Q12906	Q12906 [55-74]	0.84297	ILF3	Interleukin enhancer-binding factor 3
[R].TPETLLPFAEAEAFLK.[K]	Q3KQU3 1xPhospho [T813]	Q3KQU3	Q3KQU3 [813-828]	0.843507	MAP7D1	MAP7 domain-containing protein 1
[R].SESTENQSYAK.[H]	Q96RT1 1xPhospho [S1015]	Q96RT1	Q96RT1 [1013-1023]	0.847286	ERBIN	Erbin	Yes
[K].YATVSSPSK.[S]	Q01804 1xPhospho [S546]	Q01804	Q01804 [541-549]	0.848577	OTUD4	OTU domain-containing protein 4
[K].ESAAPASPAPSPAPSPTPAPPQK.[E]	Q3KQU3 2xPhospho [S548;S]	Q3KQU3	Q3KQU3 [538-560]	0.848971	MAP7D1	MAP7 domain-containing protein 1
[K].ELSPAALEK.[R]	O75683 1xPhospho [S138]	O75683	O75683 [136-144]	0.84904	SURF6	Surfeit locus protein 6
[R].EASQTSSSPAPK.[A]	P30281 1xPhospho [S]	P30281	P30281 [257-268]	0.849086	CCND3	G1/S-specific cyclin-D3
[R].SNSTTQVSQPR.[S]	Q9UPN4 1xPhospho [S/T]	Q9UPN4	Q9UPN4 [76-86]	0.849202	CEP131	Centrosomal protein of 131 kDa
[R].LNHSPPQSSSR.[Y]	Q5T8P6 1xPhospho [S127]	Q5T8P6	Q5T8P6 [124-134]	0.84923	RBM26	RNA-binding protein 26
[R].SGDLGDMEPLK.[G]	O60716 1xPhospho [S920]	O60716	O60716 [920-930]	0.849821	CTNND1	Catenin delta-1
[K].IESDVQEPTEPEDDLDIMLGNK.[K]	P20042 1xPhospho [T111]	P20042	P20042 [103-124]	0.849843	EIF2S2	Eukaryotic translation initiation factor 2 subunit 2
[K].KAASPSPQSVR.[R]	Q8IYB3 2xPhospho [S740;S]	Q8IYB3	Q8IYB3 [735-745]	0.850622	SRRM1	Serine/arginine repetitive matrix protein 1
[K].QMNMSPPPGNAGPVIMSIEEK.[M]	Q86U42 1xPhospho [S150]	Q86U42	Q86U42 [146-166]	0.851938	PABPN1	Polyadenylate-binding protein 2
[K].CSLPAEEDSVLEK.[L]	P27816 1xPhospho [S636]	P27816	P27816 [635-647]	0.852636	MAP4	Microtubule-associated protein 4
[R].SPPLMVK.[K]	Q8N264 1xPhospho [S415]	Q8N264	Q8N264 [415-421]	0.852735	ARHGAP24	Rho GTPase-activating protein 24
[R].QNGSNDSDRYSDNEEGK.[K]	P42166 1xPhospho [S/Y]	P42166	P42166 [174-190]	0.852814	TMPO	Lamina-associated polypeptide 2, isoform alpha
[R].EESLVEELSPASEK.[K]	Q9BXK5 1xPhospho [S426]	Q9BXK5	Q9BXK5 [418-431]	0.853073	BCL2L13	Bcl-2-like protein 13
[K].KVASGVLSPPPAAPPPSSSSVPEAGGPPIK.[K]	Q8IXM2 1xPhospho [S110]	Q8IXM2	Q8IXM2 [103-132]	0.854749	BAP18	Chromatin complexes subunit BAP18
[R].SPAGSQQQFGYSPGQQQTHPQGSPR.[T]	Q8TAP9 1xPhospho [S/T]	Q8TAP9	Q8TAP9 [93-117]	0.856076	MPLKIP	M-phase-specific PLK1-interacting protein
[R].SPEAVGPELEAEEK.[L]	Q96N64 1xPhospho [S81]	Q96N64	Q96N64 [81-94]	0.856141	PWWP2A	PWWP domain-containing protein 2A
[R].IDEDGENTQIEDTEPMSPVLNSK.[F]	Q12888 1xPhospho [T/S]	Q12888	Q12888 [536-558]	0.857217	TP53BP1	TP53-binding protein 1
[K].TIASDSEEEAGKELSDK.[K]	Q96ST2 2xPhospho [S438;S440]	Q96ST2	Q96ST2 [435-451]	0.857516	IWS1	Protein IWS1 homolog
[R].TIQEVLEEQSEDEDREAK.[R]	P18858 1xPhospho [S141]	P18858	P18858 [132-149]	0.858162	LIG1	DNA ligase 1
[R].GNIETTSEDGQVFSPK.[K]	Q5T200 1xPhospho [S/T]	Q5T200	Q5T200 [980-995]	0.858663	ZC3H13	Zinc finger CCCH domain-containing protein 13
[R].GFSFVASSLIQEPSQQDLHK.[V]	Q15349 1xPhospho [S377]	Q15349	Q15349 [375-394]	0.858806	RPS6KA2	Ribosomal protein S6 kinase alpha-2
[R].SISCEEATCSDTSESILEEEPQENQK.[K]	O94763 1xPhospho [S]	O94763	O94763 [440-465]	0.858821	URI1	Unconventional prefoldin RPB5 interactor 1
[R].GSPPVPSGPPMEEDGLR.[W]	Q9H4L4 1xPhospho [S212]	Q9H4L4	Q9H4L4 [211-227]	0.862703	SENP3	Sentrin-specific protease 3
[R].SRSESETSTMAAK.[K]	Q96B23 1xPhospho [S145]	Q96B23	Q96B23 [143-155]	0.86299	C18orf25	Uncharacterized protein C18orf25
[R].QISLPDLSQEEPQLK.[T]	Q15390 1xPhospho [S119]	Q15390	Q15390 [117-131]	0.863418	MTFR1	Mitochondrial fission regulator 1
[K].GHYEVTGSDDETGK.[L]	Q09666 1xPhospho [S/T]	Q09666	Q09666 [5834-5847]	0.865182	AHNAK	Neuroblast differentiation-associated protein AHNAK
[R].ESVASGDDRAEEDMDEAIEK.[G]	P46821 1xPhospho [S995]	P46821	P46821 [991-1010]	0.865981	MAP1B	Microtubule-associated protein 1B
[K].QEPCAQHNGSEPASPKR.[E]	Q8N6T7 1xPhospho [S330]	Q8N6T7	Q8N6T7 [317-333]	0.86621	SIRT6	NAD-dependent protein deacylase sirtuin-6
[R].VNDAEPGSPEAPQGK.[R]	Q8N8A6 1xPhospho [S83]	Q8N8A6	Q8N8A6 [76-90]	0.867903	DDX51	ATP-dependent RNA helicase DDX51
[K].AQAVSEEEEEEEGK.[S]	Q9GZR7 1xPhospho [S82]	Q9GZR7	Q9GZR7 [78-91]	0.86969	DDX24	ATP-dependent RNA helicase DDX24
[R].DAGDPSPPNK.[M]	Q9BTA9 1xPhospho [S53]	Q9BTA9	Q9BTA9 [48-57]	0.870036	WAC	WW domain-containing adapter protein with coiled-coil
[K].EENPESDGEPVVEDGTSVK.[T]	Q13439 1xPhospho [S266]	Q13439	Q13439 [261-279]	0.870151	GOLGA4	Golgin subfamily A member 4
[R].RSSTSGDTEEEEEEEVVPFSSDEQK.[R]	O15231 2xPhospho [T/S]	O15231	O15231 [151-175]	0.870373	ZNF185	Zinc finger protein 185
[K].DTQSPSTCSEGLLGWSQK.[D]	Q9C0C2 1xPhospho [S712]	Q9C0C2	Q9C0C2 [709-726]	0.871726	TTYH3	Protein tweety homolog 3
[R].GPGSWWTSTESLCSNASGDSR.[H]	Q63ZY3 1xPhospho [S/T]	Q63ZY3	Q63ZY3 [76-96]	0.871949	KANK2	KN motif and ankyrin repeat domain-containing protein 2
[K].TPPVVIK.[S]	Q96A49 1xPhospho [T248]	Q96A49	Q96A49 [248-254]	0.87276	SYAP1	Synapse-associated protein 1
[R].SGSMDPSGAHPSVR.[Q]	Q07666 1xPhospho [S]	Q07666	Q07666 [18-31]	0.873197	KHDRBS1	KH domain-containing, RNA-binding, signal transduction-associated protein 1
[R].VSPSDTTPLVSR.[S]	Q9HCK8 1xPhospho [S2046]	Q9HCK8	Q9HCK8 [2045-2056]	0.87354	CHD8	Chromodomain-helicase-DNA-binding protein 8
[R].KPDAEVLTVESPEEEAMTK.[Y]	Q8IVF2 1xPhospho [S5175]	Q8IVF2	Q8IVF2 [5165-5183]	0.873545	AHNAK2	Protein AHNAK2
[R].VSPSPSQESLSSSK.[S]	Q5JSH3 1xPhospho [S]	Q5JSH3	Q5JSH3 [560-573]	0.874057	WDR44	WD repeat-containing protein 44
[R].SEDMPFSPK.[A]	Q12888 1xPhospho [S265]	Q12888	Q12888 [259-267]	0.875182	TP53BP1	TP53-binding protein 1
[K].AGLESGAEPGDGDSDTTK.[K]	O60832 1xPhospho [S/T]	O60832	O60832 [481-498]	0.875333	DKC1	H/ACA ribonucleoprotein complex subunit DKC1
[R].RKPEDVLDDDDAGSAPLK.[S]	P35613 1xPhospho [S362]	P35613	P35613 [349-366]	0.87607	BSG	Basigin
[K].DSDQVAQSDGEESPAAEEQLLGEHIK.[E]	O94979 1xPhospho [S]	O94979	O94979 [520-545]	0.876434	SEC31A	Protein transport protein Sec31A
[R].SPTVLCQK.[V]	Q5VUA4 1xPhospho [S2035]	Q5VUA4	Q5VUA4 [2035-2042]	0.877447	ZNF318	Zinc finger protein 318
[R].TPDTSTYCYETAEK.[I]	P46821 1xPhospho [T/S]	P46821	P46821 [2034-2047]	0.878538	MAP1B	Microtubule-associated protein 1B
[R].SPISDNSGCDAPGNSNPSLSVPSSAESEK.[Q]	Q99590 1xPhospho [S338]	Q99590	Q99590 [338-366]	0.878781	SCAF11	Protein SCAF11
[K].ETIQGTGSWGPEPPGPGIPPAYSSPR.[R]	Q9H4L4 1xPhospho [Y/S]	Q9H4L4	Q9H4L4 [3-28]	0.879238	SENP3	Sentrin-specific protease 3
[R].LPSGSGAASPTGSAVDIR.[A]	Q09666 2xPhospho [S212;S216]	Q09666	Q09666 [208-225]	0.880206	AHNAK	Neuroblast differentiation-associated protein AHNAK
[R].KTSDANETEDHLESLICK.[V]	Q09161 1xPhospho [T/S]	Q09161	Q09161 [20-37]	0.881122	NCBP1	Nuclear cap-binding protein subunit 1
[R].QVLQSTQSPR.[T]	Q9Y2D5 1xPhospho [S/T]	Q9Y2D5	Q9Y2D5 [741-750]	0.881165	AKAP2	A-kinase anchor protein 2
[K].GYTSDDDTWEPEIHLEDCK.[E]	Q99549 1xPhospho [T/S]	Q99549	Q99549 [82-100]	0.881509	MPHOSPH8	M-phase phosphoprotein 8
[K].AEEPPSQLDQDTQVQDMDEGSDDEEEGQK.[V]	Q15459 1xPhospho [S/T]	Q15459	Q15459 [339-367]	0.881609	SF3A1	Splicing factor 3A subunit 1
[R].ASSLSESSPPK.[A]	Q9UHB6 1xPhospho [S]	Q9UHB6	Q9UHB6 [367-377]	0.882681	LIMA1	LIM domain and actin-binding protein 1
[K].STMPTSLPNLAK.[E]	Q04721 1xPhospho [S/T]	Q04721	Q04721 [2110-2121]	0.882743	NOTCH2	Neurogenic locus notch homolog protein 2
[R].LEDLDTCMMTPK.[S]	Q5VZK9 1xPhospho [T916]	Q5VZK9	Q5VZK9 [907-918]	0.88307	CARMIL1	F-actin-uncapping protein LRRC16A
[R].QNSSSSDSGGSIVR.[D]	Q12929 1xPhospho [S]	Q12929	Q12929 [657-670]	0.886631	EPS8	Epidermal growth factor receptor kinase substrate 8
[R].LVGATATSSPPPK.[A]	Q96QD9 1xPhospho [T/S]	Q96QD9	Q96QD9 [8-20]	0.886881	FYTTD1	UAP56-interacting factor
[R].SILSPGGSCGPIK.[V]	P78347 1xPhospho [S210]	P78347	P78347 [207-219]	0.88689	GTF2I	General transcription factor II-I
[R].AHAWPSPYK.[D]	Q8NFJ5 1xPhospho [S345]	Q8NFJ5	Q8NFJ5 [340-348]	0.887049	GPRC5A	Retinoic acid-induced protein 3
[R].DTSPSSGSAVSSSK.[V]	Q8NEY8 1xPhospho [S/T]	Q8NEY8	Q8NEY8 [203-216]	0.889647	PPHLN1	Periphilin-1
[R].CENTPLIGRESPPPSYTSSMR.[A]	Q9C0H2 1xPhospho [S496]	Q9C0H2	Q9C0H2 [486-506]	0.889747	DDX24	ATP-dependent RNA helicase DDX24
[R].QLSLEGSGLGVEDLK.[D]	Q9UMZ2 1xPhospho [S752]	Q9UMZ2	Q9UMZ2 [750-764]	0.890213	SYNRG	Synergin gamma
[R].YVGFGNTPPPQK.[K]	Q8N6T3 1xPhospho [T189]	Q8N6T3	Q8N6T3 [183-194]	0.891838	ARFGAP1	ADP-ribosylation factor GTPase-activating protein 1
[R].DGSKSEDELDQASTPTDVR.[D]	P30279 1xPhospho [S]	P30279	P30279 [267-285]	0.89188	CCND2	G1/S-specific cyclin-D2
[R].SPTGPSNSFLANMGGTVAHK.[I]	Q96I25 1xPhospho [S/T]	Q96I25	Q96I25 [222-241]	0.892373	CHAMP1	Chromosome alignment-maintaining phosphoprotein 1
[R].DLSPPDNHLSPQNDDALETR.[A]	O94972 1xPhospho [S454]	O94972	O94972 [452-471]	0.893785	TRIM37	E3 ubiquitin-protein ligase TRIM37
[R].SAMDSPVPASMFAPEPSSPGAAR.[A]	O00178 1xPhospho [S]	O00178	O00178 [8-30]	0.894035	GTPBP1	GTP-binding protein 1
[K].VEEESTGDPFGFDSDDESLPVSSK.[N]	Q7Z5K2 1xPhospho [S77]	Q7Z5K2	Q7Z5K2 [64-87]	0.894058	WAPL	Wings apart-like protein homolog
[R].RAEDGSVIDYELIDQDAR.[D]	P07355 1xPhospho [S184]	P07355	P07355 [179-196]	0.894175	ANXA2	Annexin A2
[R].SESLESPR.[G]	Q92974 1xPhospho [S645]	Q92974	Q92974 [643-650]	0.894229	ARHGEF2	Rho guanine nucleotide exchange factor 2
[R].SVNFSLTPNEIK.[V]	P46821 1xPhospho [T1282]	P46821	P46821 [1276-1287]	0.897057	MAP1B	Microtubule-associated protein 1B
[R].SPILLPK.[G]	Q8TD16 1xPhospho [S582]	Q8TD16	Q8TD16 [582-588]	0.897996	BICD2	Protein bicaudal D homolog 2
[R].DQTPDENDQVVVK.[I]	O00425 1xPhospho [T528]	O00425	O00425 [526-538]	0.898084	IGF2BP3	Insulin-like growth factor 2 mRNA-binding protein 3
[R].HPPSPPLR.[R]	Q5VY43 1xPhospho [S1029]	Q5VY43	Q5VY43 [1026-1033]	0.898912	PEAR1	Platelet endothelial aggregation receptor 1
[R].SPTNSLLK.[H]	Q14106 1xPhospho [S222]	Q14106	Q14106 [222-229]	0.900278	TOB2	Protein Tob2
[K].AEEPPSQLDQDTQVQDMDEGSDDEEEGQK.[V]	Q15459 1xPhospho [S359]	Q15459	Q15459 [339-367]	0.901165	SF3A1	Splicing factor 3A subunit 1
[K].EVDATSPAPSTSSTVK.[T]	Q16666 1xPhospho [S/T]	Q16666	Q16666 [101-116]	0.901479	IFI16	Gamma-interferon-inducible protein 16
[R].EPPSPSETGPNSLGTFK.[K]	Q52LW3 1xPhospho [S]	Q52LW3	Q52LW3 [586-602]	0.907931	ARHGAP29	Rho GTPase-activating protein 29
[K].LTPVSLSNSPIK.[G]	P46100 1xPhospho [S598]	P46100	P46100 [590-601]	0.908126	ATRX	Transcriptional regulator ATRX
